# Supplementary material for: Large domains of heterochromatin direct the formation of short mitotic chromosome loops
Source: eLife. 2020 Sep 11;9:e57212. doi: 10.7554/eLife.57212 (PMC7515631; doi:10.7554/eLife.57212)
Supplement: Figure 1—figure supplement 1—source data 1. [file elife-57212-fig1-figsupp1-data1.xlsx]

## Sheet: All Values
1	FISH	PI	2	FISH	PI	3	FISH	PI	4	FISH	PI	5	FISH	PI	6	FISH	PI	7	FISH	PI	9	FISH	PI	10	FISH	PI	11	FISH	PI	12	FISH	PI	13	FISH	PI	14	FISH	PI	15	FISH	PI	16	FISH	PI	17	FISH	PI	18	FISH
X	Y	Y	X	Y	Y	X	Y	Y	X	Y	Y	X	Y	Y	X	Y	Y	X	Y	Y	X	Y	Y	X	Y	Y	X	Y	Y	X	Y	Y	X	Y	Y	X	Y	Y	X	Y	Y	X	Y	Y	X	Y	Y	X	Y
0	19	179	0	25	189	0	19	183	0	32	156	0	21	157	0	39	162	0	35	200	0	24	203	0	9	229	0	9	167	0	20	160	0	13	146	0	17	139	0	21	147	0	30	167	0	30	147	0	17
1	18.954	182.465	1	26.349	198.125	1	16.305	195.748	1	31.337	164.515	1	21	164.663	1	37.318	186.867	1	30.477	204.221	1	22.985	206.534	1	10.83	221.042	1	4.474	168.941	1	23.039	178.987	1	11.766	167.384	1	17.046	149.747	1	23	163.48	1	29.363	174.677	1	29.091	179.751	1	16.4
2	17.476	179.996	2	24.376	204.11	2	10.334	203.731	2	32.474	173.304	2	20.0793	176.508	2	31.848	203.49	2	29.595	204.451	2	24.131	199.864	2	12.077	204.02	2	2.351	163.721	2	28.662	178.685	2	12.046	182.023	2	16.602	159.709	2	27.48	172.4	2	24.997	184.273	2	28.304	200.229	2	14.92
3	17.378	177.485	3	22.588	203.045	3	7.247	205.523	3	31.1	172.701	3	18.5261	186.519	3	23.931	216.051	3	27.779	201.428	3	25.374	193.374	3	16.359	189.341	3	1.501	156.184	3	36.824	173.184	3	12	188.134	3	15.839	166.811	3	36.76	172.76	3	19.275	200.056	3	26.112	209.603	3	14.36
4	14.765	181.391	4	22.18	200.081	4	9.652	207.376	4	27.659	179.091	4	18.3092	194.811	4	18.349	225.827	4	26.373	200.061	4	23.045	189.637	4	24.98	181.052	4	2.523	155.375	4	40.981	174.058	4	12.657	185.137	4	15.627	174.579	4	45.68	175.16	4	14.373	201.036	4	24.858	213.256	4	14
5	13.107	181.997	5	24.921	195.966	5	13.073	206.596	5	25.409	178.226	5	19.1822	193.856	5	17.976	231.818	5	22.224	199.242	5	22.06	192.545	5	40.184	171.332	5	6.288	156.123	5	30.831	175.477	5	14.586	170.635	5	16.195	170.343	5	48	179	5	10.733	199.156	5	26.01	211.767	5	15
6	13.519	183.243	6	31.747	194.318	6	16.26	208.194	6	27.904	174.373	6	20.0186	191.311	6	18.596	229.516	6	19.428	192.6	6	19.464	200.557	6	51.229	162.205	6	13.592	158.737	6	18.974	178.432	6	16.24	164.607	6	20.808	163.566	6	43.16	181.76	6	9.692	199.238	6	28.108	209.465	6	13.96
7	10.88	187.417	7	42.262	183.866	7	23.137	200.497	7	33.096	172.501	7	26.4598	190.417	7	20.958	225.628	7	17.302	193.732	7	21.643	203.54	7	50.305	154.005	7	28.973	156.689	7	16.005	171.987	7	14.288	160.72	7	28.11	158.948	7	40.44	180.96	7	14.359	193.573	7	33.625	201.548	7	14.56
8	7.25	180.077	8	46.126	169.203	8	33.161	185.883	8	38.443	168.635	8	33.8921	193.054	8	22.748	229.602	8	16.15	192.509	8	21.155	205.849	8	44.001	146.253	8	61.432	153.69	8	19.078	172.879	8	11.468	157.634	8	41.105	157.598	8	42.92	170.96	8	18.121	176.458	8	32.968	195.103	8	12.76
9	7.637	168.718	9	61.313	158.465	9	54.654	176.493	9	51.269	158.335	9	39.3606	194.927	9	26.524	232.064	9	18.72	189.96	9	21	200.073	9	36.913	140.094	9	114.791	152.154	9	25.927	171.226	9	10.491	155.082	9	52.308	159.566	9	52.2	152.28	9	20.025	152.733	9	28.14	188.682	9	19.04
10	13.252	160.66	10	96.904	158.213	10	80.827	164.516	10	71.277	150.925	10	42.1769	191.826	10	26.887	218.27	10	23.588	181.638	10	21.806	188.971	10	34.797	140.386	10	167.079	144.879	10	34.643	164.943	10	15.209	151.197	10	60.447	151.314	10	66	135	10	24.597	126.917	10	28.778	176.356	10	29
11	23.907	148.454	11	132.325	156.056	11	104.652	152.97	11	99.997	141.453	11	46.1769	184.49	11	28.943	203.726	11	33.873	165.395	11	19.57	175.66	11	35.422	139.373	11	206.86	136.351	11	44.499	157.403	11	24.544	148.309	11	67.135	132.447	11	71.364	118.405	11	34.945	106.14	11	38.648	160.427	11	43.32
12	35.965	128.801	12	164.053	148.58	12	126.723	138.993	12	125.981	124.24	12	50.2537	178.942	12	39.107	185.038	12	47.478	153.3	12	19.81	151.94	12	42.926	133.289	12	230.872	125.576	12	55.962	147.926	12	37.62	139.337	12	68.798	117.642	12	73.591	104.354	12	51.242	89.856	12	57.07	144.459	12	60.84
13	42.579	111.265	13	187.67	139.072	13	138.987	128.939	13	153.642	111.066	13	53.9819	176.386	13	52.456	155.44	13	71.213	139.409	13	22.43	134.04	13	54.332	122.995	13	222.739	112.136	13	69.714	137.333	13	50.505	123.587	13	70.113	105.774	13	75.61	94.116	13	73.162	78.186	13	85.33	134.13	13	80.56
14	62.753	95.462	14	175.85	131.508	14	131.048	118.962	14	167.647	103.273	14	60.52	170.348	14	60.234	136.655	14	99.348	126.881	14	29.48	122.09	14	69.934	122.018	14	202.167	97.11	14	98.413	126.539	14	55.824	114.035	14	74.538	94.72	14	75.238	87.58	14	88.473	71.127	14	111.746	117.656	14	101.4
15	80.472	81.538	15	142.564	127.213	15	122.756	105.976	15	165.089	96.786	15	75.6519	160.028	15	55.46	120.781	15	125.186	123.483	15	39.1	115.14	15	75.027	123.913	15	206.869	86.079	15	135.182	117.691	15	58.646	101.388	15	84.025	88.567	15	74.663	86.184	15	93.321	69.562	15	123.583	101.823	15	124
16	87.392	71.907	16	118.902	123.121	16	116.27	93.038	16	164.606	91.297	16	96.0902	149.206	16	60.371	107.254	16	126.013	122.29	16	58.01	112.38	16	72.956	124.577	16	230.468	84.073	16	138.243	112.05	16	62.726	89.407	16	97.122	84.378	16	76.532	88.653	16	73.271	70.338	16	109.407	97.912	16	133.12
17	87.034	67.166	17	98.648	118.727	17	109.214	86.931	17	161.244	88.444	17	110.861	135.974	17	75.632	97.574	17	118.487	119.496	17	80.63	111.19	17	70.217	122.706	17	233.038	88.944	17	112.936	105.004	17	73.273	79.122	17	104.726	81.451	17	86.393	94.607	17	54.996	70.686	17	93.558	96.039	17	127.44
18	83.202	68.629	18	90.353	117.176	18	107.87	84.746	18	157.484	85.599	18	117.454	123.024	18	90.403	93.373	18	108.7	115.293	18	107.68	111.81	18	69.014	120.778	18	219.069	94.241	18	92.635	102.623	18	79.26	72.612	18	95.598	81.339	18	89.823	98.754	18	45.04	71.136	18	83.149	92.334	18	102.72
19	81.264	70.676	19	92.697	118.091	19	102.535	83.141	19	151.457	78.927	19	117.764	112.591	19	109.17	94.028	19	97.901	110.966	19	119.48	112.81	19	69.476	118.288	19	183.632	99.952	19	82.861	102.988	19	74.451	66.767	19	93.323	83.995	19	82.367	96.974	19	47.501	70.23	19	75.86	90.158	19	82.72
20	81.402	73.624	20	86.593	115.975	20	92.798	81.768	20	131.264	77.085	20	111.424	103.573	20	121.051	95.66	20	86.294	106.591	20	116.95	112.19	20	80.373	115.453	20	154.296	104.982	20	79.656	102.417	20	67.486	64.991	20	107.975	87.368	20	70.723	95.368	20	51.402	71.92	20	82.741	95.009	20	67
21	76.217	77.574	21	76.553	112.254	21	81.609	84.492	21	96.867	78.481	21	110.667	99.582	21	125.112	94.626	21	81.852	103.062	21	103.04	110.38	21	101.865	107.914	21	133.752	108.461	21	79.392	100.765	21	58.069	65.877	21	141.086	88.146	21	65.001	95.774	21	61.848	74.647	21	92.566	101.636	21	68.28
22	73.448	77.521	22	69.262	112.145	22	80.3	91.796	22	67.024	79.766	22	113.593	104.827	22	113.078	92.395	22	71.6	100.689	22	82.99	111.62	22	121.899	103.098	22	114.071	109.436	22	86.189	102.111	22	59.092	65.62	22	165.617	88.107	22	63.161	96.496	22	79.578	78.671	22	86.634	110.012	22	70.44
23	65.944	80.073	23	67.678	114.587	23	99.561	99.37	23	59.034	78.474	23	96.9654	109.346	23	96.25	92.795	23	63.876	99.694	23	64.42	116.86	23	136.24	100.18	23	96.69	106.747	23	89.533	99.167	23	69.669	67.344	23	189.273	90.112	23	60.397	94.249	23	103.975	79.243	23	82.636	114.93	23	77.56
24	62.451	88.529	24	77.566	116.546	24	112.347	104.989	24	63.52	77.173	24	86.8436	109.391	24	96.229	91.284	24	62.922	97.074	24	53.049	119.961	24	140.473	100.035	24	79.556	105.573	24	108.844	96.115	24	80.425	69.781	24	180.509	91.638	24	59.239	91.551	24	142.312	83.024	24	87.775	113.75	24	80.52
25	67.225	92.693	25	92.295	116.385	25	111.153	110.493	25	85.625	77.001	25	85.5562	101.974	25	104.49	89.416	25	64.55	93.567	25	46.638	124.144	25	146.279	102.901	25	74.451	104.91	25	131.025	92.837	25	79.482	69.594	25	162.809	91.753	25	63.295	95.841	25	161.623	84.915	25	90.938	111.789	25	78
26	70.389	94.178	26	108.289	116.994	26	89.251	113.641	26	117.885	74.169	26	77.0726	99.078	26	118.882	89.784	26	61.684	89.939	26	51.263	129.198	26	144.195	104.004	26	99.148	103.522	26	135.552	91.279	26	82.576	70.494	26	141.817	93.4	26	75.614	103.567	26	164.301	85.992	26	91.691	113.713	26	87.64
27	73.039	97.737	27	111.788	118.386	27	76.341	112.357	27	147.774	73.112	27	69.0122	97.632	27	114.177	90.834	27	60.363	84.867	27	68.111	127.617	27	120.625	107.896	27	134.762	102.324	27	126.953	89.683	27	92.593	75.042	27	122.49	95.122	27	88.757	108.967	27	139.812	85.219	27	79.738	112.899	27	109.68
28	67.632	100.46	28	97.02	115.7	28	76.453	106.832	28	155.842	70.652	28	66.2786	99.93	28	109.001	93.789	28	60.65	81.305	28	78.498	122.646	28	95.451	107.148	28	153.333	98.948	28	109.835	89.768	28	94.792	75.499	28	112.717	96.674	28	105.336	113.982	28	102.327	83.57	28	88.703	118.243	28	148.04
29	58.995	100.8	29	74.02	113.3	29	82.896	102.981	29	162.19	69.551	29	62.6847	109.692	29	105.493	96.286	29	69.575	83.545	29	77.597	118.433	29	73.318	106.217	29	146.608	95.894	29	105.464	91.141	29	93.342	75.401	29	118.59	93.65	29	119.547	117.502	29	76.432	82.339	29	119.468	124.402	29	176.8
30	54.141	101.74	30	55.18	118.04	30	88.599	100.311	30	155.666	69.267	30	57.8808	112.842	30	100.202	97.492	30	90.95	88.767	30	73.537	115.238	30	67.808	107.653	30	125.848	96.702	30	102.933	92.86	30	92.19	73.157	30	127.183	91.235	30	123.047	117.04	30	73.48	81.012	30	150.388	127.022	30	174
31	53.733	102.526	31	50.26	121.78	31	88.272	97.282	31	144.796	66.243	31	59.5736	113.027	31	105.761	97.071	31	114.266	96.272	31	72.808	112.837	31	77.783	108.18	31	116.503	100.625	31	88.606	92.661	31	87.89	73.725	31	122.739	89.369	31	117.254	114.95	31	86.385	77.97	31	154.902	124.03	31	148.693
32	58.847	99.496	32	50.74	125.04	32	85.41	96.257	32	133.026	63.67	32	68.6054	112.075	32	124.279	99.594	32	128.672	98.685	32	71.22	115.97	32	103.059	107.807	32	123.135	105.957	32	75.118	94.194	32	90.435	75.377	32	101.62	88.239	32	102.849	111.749	32	98.921	74.506	32	129.819	122	32	117.16
33	66.782	100.266	33	51.3	128.78	33	84.112	96.876	33	127.341	63.271	33	80.0081	107.487	33	145.68	100.418	33	140.326	97.399	33	73.778	117.802	33	146.126	109.37	33	162.264	107.99	33	67.704	98.469	33	89.102	77.157	33	74.619	86.048	33	91.581	112.151	33	112.308	68.731	33	104.906	121.168	33	100.3
34	69.445	100.095	34	59.68	131.52	34	96.718	98.887	34	114.679	68.346	34	93.7383	104.813	34	143.599	98.44	34	136.078	99.29	34	73.611	115.573	34	169.138	112.527	34	223.942	108.888	34	69.722	103.571	34	85.213	81.454	34	54.274	82.181	34	77.372	113.992	34	121.157	64.533	34	80.98	117.685	34	107.07
35	62.254	96.549	35	77.94	134.82	35	109.748	100.026	35	114.137	74.393	35	101.898	103.634	35	134.917	95.168	35	140.573	101.49	35	69.908	117.312	35	150.353	112.491	35	247.973	104.539	35	74.868	106.4	35	74.287	84.328	35	41.799	78.495	35	67.172	118.058	35	123.149	61.92	35	63.582	114.985	35	104.407
36	57.314	93.76	36	97.72	141.56	36	109.833	103.383	36	100.491	80.798	36	103.406	107.597	36	117.592	94.349	36	149.737	103.944	36	76.372	113.702	36	132.466	114.228	36	237.532	98.934	36	86.296	110.505	36	60.622	82.436	36	36.432	76.345	36	63.771	121.75	36	130.406	60.254	36	64.174	115.431	36	98.067
37	50.75	92.705	37	114	143.92	37	104.647	101.8	37	85.426	85.781	37	98.4315	113.423	37	102.079	94.232	37	138.814	104.844	37	90.993	115.309	37	114.217	112.071	37	164.608	91.037	37	98.367	111.685	37	55.443	82.025	37	29.134	75.613	37	61.466	120.398	37	126.993	61.127	37	63.429	118.864	37	86.901
38	54.739	97.958	38	114.78	137.48	38	88.703	103.494	38	76.229	86.35	38	87.1266	115.019	38	83.922	96.766	38	116.991	101.869	38	97.492	119.848	38	106.359	107.591	38	94.769	83.582	38	101.459	107.783	38	63.394	79.378	38	19.385	71.658	38	60.734	109.025	38	110.783	61.881	38	60.05	114.63	38	70.598
39	74.559	103.317	39	115.44	133.66	39	66.544	103.772	39	66.801	81.816	39	73.6441	115.473	39	70.429	102.544	39	90.77	99.938	39	102.84	118.811	39	101.222	104.432	39	50.706	78.5	39	105.281	110.05	39	77.111	78.185	39	13.121	65.303	39	60.277	99.605	39	92.046	60.333	39	54.902	103.619	39	58.572
40	106.754	103.712	40	113.204	126.486	40	45.487	101.089	40	57.673	75.688	40	65.3864	115.195	40	72.812	111.153	40	77.415	97.675	40	103.555	115.588	40	85.326	101.699	40	29.044	71.743	40	106.733	112.624	40	85.742	80.519	40	12.861	62.097	40	51.932	87.864	40	69.353	62.374	40	45.487	95.154	40	43.286
41	128.591	106.973	41	121.071	122.278	41	30.652	98.685	41	51.982	70.056	41	60.886	111.834	41	87.732	110.208	41	80.769	93.72	41	80.165	106.086	41	62.503	98.595	41	22.599	66.549	41	105.821	111.425	41	90.382	79.773	41	18.817	63.698	41	44.041	79.894	41	48.441	62.987	41	43.748	91.777	41	30.826
42	120.018	113.435	42	124.034	112.944	42	21.093	97.178	42	39.175	66.033	42	58.7636	106.317	42	107.526	101.656	42	82.42	91.132	42	53.96	96.733	42	43.985	96.794	42	26.999	65.967	42	101.967	105.928	42	78.478	79.148	42	29.192	66.625	42	32.854	71.787	42	34.133	59.663	42	66.804	86.919	42	19.636
43	103.22	111.833	43	114.299	107.859	43	18.055	90.872	43	24.702	61.654	43	56.2279	101.653	43	119.266	96.347	43	78.135	90.062	43	35.465	93.875	43	34.802	98.03	43	37.121	65.905	43	95.185	100.478	43	55.204	78.594	43	41.468	64.87	43	21.342	70.749	43	20.681	54.942	43	96.343	83.842	43	10.421
44	83.561	105.82	44	91.052	105.509	44	11.561	84.974	44	23.669	58.806	44	52.3318	97.927	44	109.934	92.263	44	70.434	93.859	44	23.72	90.869	44	31.557	98.619	44	41.876	69.846	44	78.431	92.97	44	38.97	76.83	44	56.811	66.33	44	15.292	71.27	44	14.069	49.08	44	110.343	83.017	44	5.031
45	55.774	102.5	45	67.966	101.973	45	8.061	79.722	45	30.335	58.672	45	51.6439	93.472	45	97.64	88.112	45	59.449	99.932	45	21.995	89.292	45	31.036	97.364	45	51.142	72.016	45	54.316	81.834	45	32.87	73.024	45	72.755	66.877	45	12.392	72.721	45	13.965	45.117	45	109.187	80.398	45	5.195
46	44.13	95.81	46	74.13	101.825	46	6.607	77.005	46	41.038	61.19	46	53.4178	94.079	46	89.636	81.513	46	46.963	102.643	46	24.82	90.244	46	34.059	96.97	46	68.947	73.548	46	32.243	78.27	46	27.064	70.487	46	95.198	66.077	46	12.749	73.813	46	16.346	43.115	46	111.452	79.63	46	14.25
47	39.513	92.543	47	95.562	105.568	47	7.778	76.858	47	59.284	61.486	47	59.7582	94.997	47	90.073	77.706	47	50.388	103.646	47	27.444	93.126	47	44.104	98.665	47	92.22	75.747	47	18.11	75.923	47	23.642	68.582	47	103.659	65.731	47	15.066	73.683	47	19.88	43.804	47	117.358	79.182	47	32.069
48	31.189	91.904	48	123.2	110.335	48	15.048	77.894	48	78.276	61.141	48	68.5544	93.703	48	89.891	69.91	48	62.116	101.949	48	31.932	96.147	48	63.634	102.098	48	113.714	79.825	48	14.689	72.181	48	23.836	67.607	48	98.108	65.066	48	20.469	73.351	48	24.995	47.653	48	122.678	80.869	48	47.128
49	17.898	91.04	49	133.684	111.085	49	31.009	75.928	49	95.819	64.477	49	76.3414	91.529	49	90.479	66.136	49	80.987	102.202	49	36.273	97.714	49	93.488	102.344	49	132.941	87.17	49	19.411	67.644	49	25.469	65.91	49	92.758	67.595	49	38.981	74.053	49	35.634	53.316	49	123	85.7	49	57.559
50	9.986	94.652	50	126.757	109.776	50	50.293	71.49	50	102.402	69.344	50	74.1039	87.569	50	86.503	63.708	50	99.181	108.247	50	37.554	97.052	50	120.27	98.583	50	152.519	90.806	50	24.186	68.554	50	29.251	67.107	50	75.026	69.415	50	63.238	78.366	50	52.746	58.785	50	110.78	91.64	50	75.927
51	6.188	102.094	51	103.46	104.737	51	81.845	70.515	51	113.655	72.384	51	68.0049	82.961	51	71.663	59.963	51	112.042	109.593	51	39.526	94.774	51	141.53	98.286	51	170.078	92.036	51	30.396	68.865	51	37.781	71.175	51	68.914	70.941	51	90.939	81.657	51	75.15	61.291	51	91.2	97.64	51	85.312
52	5.836	108.11	52	69.389	98.526	52	114.05	69.611	52	119.639	74.581	52	63.7551	82.847	52	51.302	61.389	52	110.189	108.969	52	47.394	93.875	52	148.587	98.258	52	165.246	90.862	52	38.947	69.402	52	50.583	76.329	52	82.623	72.501	52	107.753	89.588	52	100.656	63.379	52	70.26	107.4	52	93.358
53	10.383	113.353	53	38.116	95.179	53	119.494	72.035	53	110.78	74.221	53	68.5618	85.812	53	42.851	63.226	53	102.741	108.18	53	60.656	93.346	53	153.171	98.323	53	151.338	85.786	53	48.266	71.544	53	59.484	78.091	53	107.326	75.499	53	113.082	95.246	53	127.316	66.304	53	57.72	109.88	53	100.708
54	18.404	118.346	54	16.397	93.225	54	123.907	75.181	54	94.123	76.619	54	76.6322	88.045	54	35.225	65.419	54	90.595	105.513	54	66.93	95.661	54	154.726	102.032	54	131.676	83.886	54	59.018	73.302	54	73.588	78.15	54	144.114	77.297	54	113.227	96.924	54	143.545	69.233	54	64.52	109.06	54	106.068
55	30.003	115.431	55	10.274	91.813	55	127.879	76.862	55	80.403	79.73	55	74.8409	88.521	55	35.185	67.597	55	77.576	100.264	55	64.613	97.371	55	165.419	109.416	55	118.637	85.628	55	64.424	75.33	55	98.075	80.42	55	163.333	77.88	55	106.111	94.818	55	142.291	70.209	55	85.68	102.42	55	102.526
56	44.142	114.325	56	8.411	96.156	56	133.119	76.546	56	79.853	78.571	56	68.16	89.481	56	42.481	70.005	56	75.708	99.302	56	61.554	99.763	56	168.619	113.25	56	116.103	87.491	56	57.791	77.219	56	119.058	83.489	56	151.173	77.031	56	99.119	93.25	56	130.154	69.966	56	122.72	96.36	56	101.685
57	54.442	112.911	57	8.455	99.174	57	142.539	75.412	57	77.416	75.713	57	62.3728	89.546	57	62.16	77.446	57	80.982	100.067	57	57.766	101.46	57	143.904	117.516	57	119.389	90.744	57	63.332	79.92	57	134.763	87.661	57	122.164	80.347	57	100.589	92.543	57	112.929	72.766				57	101.011
58	57.639	106.541	58	12.591	101.127	58	142.042	76.635	58	75.448	69.415	58	62.3493	87.456	58	80	82.181	58	85.734	104.79	58	53.887	97.804	58	106.328	119.584	58	127.126	93.252	58	78.876	83.687	58	125.202	90.541	58	98.835	83.732	58	103.853	88.258	58	90.733	77.887				58	99.273
59	55.033	103.279	59	19.544	103.28	59	127.663	79.965	59	75.594	63.763	59	68.3482	87.498	59	101.467	85.078	59	84.166	105.54	59	53.17	97.03	59	76.393	124.168	59	137.842	98.898	59	93.507	86.011	59	101.036	94.304	59	81.807	85.998	59	98.698	84.357	59	85.825	81.1				59	92.129
60	53.844	97.609	60	22.721	102.647	60	115.068	82.751	60	73.83	62.569	60	74.0782	89.034	60	117.305	87.055	60	78.728	102.469	60	55.413	97.099	60	71.183	130.964	60	144.933	99.49	60	106.77	87.989	60	84.26	98.547	60	73.806	88.622	60	89.335	84.073	60	80.771	86.224				60	83.118
61	46.855	93.52	61	31.391	100.954	61	103.282	83.126	61	75.762	60.903	61	82.6885	94.343	61	125.77	87.921	61	74.987	102.011	61	44.986	93.496	61	76.479	132.276	61	140.793	98.629	61	106.622	86.744	61	74.313	99.844	61	75.044	89.122	61	78.802	85.768	61	73.561	92.461				61	71.219
62	45.76	93.12	62	49.935	99.717	62	84.871	86.312	62	75.227	57.112	62	88.8134	97.413	62	136.088	89.713	62	67.609	100.911	62	38.68	91.798	62	80.233	128.153	62	125.881	96.355	62	96.521	80.58	62	71.855	100.439	62	65.377	86.476	62	66.639	88.804	62	69.268	95.221				62	57.586
63	49.52	92.174	63	72.392	97.219	63	68.295	87.881	63	94.221	55.755	63	89.9227	96.133	63	157.311	92.632				63	33.289	89.172	63	83.873	119.638	63	103.162	95.131	63	77.422	76.002	63	76.67	98.563	63	47.665	77.665	63	60.22	91.374	63	68.042	95.679				63	46.159
64	56.381	88.983	64	94.004	89.82	64	66.545	87.736	64	153.625	60.851	64	83.9122	95.532	64	181.466	94.671				64	32.544	90.557				64	76.872	94.355	64	64.712	72.312	64	73.716	96.517				64	60.071	91.675	64	64.073	96.586				64	49.517
65	67.708	87.798	65	104.1	89	65	68.496	89.905	65	207.662	70.157	65	72.7899	97.12	65	173.499	92.47				65	35.538	88.348				65	49.521	91.557	65	56.847	69.491	65	68.8	95.205				65	59.331	90.031							65	54.026
66	80.734	89.137	66	121.2	87.2	66	62.975	87.101	66	218.118	77.38	66	61.9817	99.727	66	164.022	91.254				66	35.762	86.351							66	54.27	71.622	66	70.464	93.388				66	58.022	90.161							66	55.476
67	91.772	91.325	67	158.1	87	67	57.716	84.503	67	179.92	81.399	67	49.9152	101.978	67	143.911	92.948				67	46.429	84.435							67	53.88	76.128	67	74.133	90.522				67	58.039	92.39
68	96.567	91.868	68	169.2	85.2	68	55.42	86.345	68	128.018	79.729	68	41.3687	102.419	68	111.381	96.962													68	51.019	76.949	68	77.557	90.246				68	57.858	92.771
69	96.821	92.607	69	151.1	87.7	69	49.544	87.518	69	92.371	80.57				69	100.21	102.682													69	46.667	75.073	69	80.03	90.268				69	55.943	93.691
70	105.098	93.473	70	127.4	92.5	70	55.654	87.205	70	75.091	77.107				70	96.853	108.712													70	44.439	74.745	70	84.559	88.812
71	110.791	93.622	71	101.6	98.4	71	73.5	84.236							71	95.533	114													71	39.463	75.16	71	87.018	89.469
72	105.103	97.733	72	96.3	102.6	72	94.154	83.19							72	91.374	110.466													72	33.274	74.352	72	83.68	90.281
73	90.895	101.65	73	100.5	106.6	73	116.381	85.456							73	83.611	100.709													73	25.294	71.994	73	76.374	92.371
			74	113.6	108.8	74	127.399	86.119																						74	22.153	71.962	74	69.836	97.851
			75	118.6	107.2	75	127.29	85.427																						75	22.5	65.5
			76	125.3	104.3
			77	108	100.4
			78	91.6	100
			79	84.6	96.4
			80	88.5	97.8
			81	106.1	100.7
			82	111.6	103.7
			83	121.9	104.9
			84	130.2	109.5
			85	104.9	119
			86	83.1	124.5
			87	59.4	124.1
[truncated: 64 more columns]

## Sheet: Binned Values
% Chr Length		2	FISH	PI	35	FISH	PI	40	FISH	PI	28	FISH	PI	25	FISH	PI	3	FISH	PI	12	FISH	PI	13	FISH	PI	20	FISH	PI	1	FISH	PI	6	FISH	PI	32	FISH	PI	34	FISH	PI	4	FISH	PI	29	FISH	PI	15	FISH	PI
		X	Y	Y	X	Y	Y	X	Y	Y	X	Y	Y	X	Y	Y	X	Y	Y	X	Y	Y	X	Y	Y	X	Y	Y	X	Y	Y	X	Y	Y	X	Y	Y	X	Y	Y	X	Y	Y	X	Y	Y	X	Y	Y
0-5		0	25	189	0	28	180	0	21	159	0	27	171	0	34	146	0	19	183	0	20	160	0	13	146	0	19	157	0	19	179	0	39	162	0	26	176	0	18	182	0	32	156	0	18	216	0	21	147
		1.14943	26.349	198.125	1.14943	25.424	171.348	1.17647	22.886	185.191	1.19048	27.579	173.002	1.31579	34.078	167.951	1.33333	16.305	195.748	1.33333	23.039	178.987	1.35135	11.766	167.384	1.35135	17.416	167.756	1.36986	18.954	182.465	1.36986	37.318	186.867	1.36986	23.765	180.773	1.36986	17.524	172.817	1.42857	31.337	164.515	1.42857	16.435	212.44	1.44928	23	163.48
		2.29885	24.376	204.11	2.29885	24.692	167.496	2.35294	22.562	202.77	2.38095	24.747	177.749	2.63158	30.572	179.71	2.66667	10.334	203.731	2.66667	28.662	178.685	2.7027	12.046	182.023	2.7027	15.562	174.427	2.73973	17.476	179.996	2.73973	31.848	203.49	2.73973	21.818	187.565	2.73973	17.972	170.09	2.85714	32.474	173.304	2.85714	14.838	208	2.89855	27.48	172.4
		3.44828	22.588	203.045	3.44828	23.411	167.52	3.52941	21.166	208.688	3.57143	21.228	187.344	3.94737	23.61	184.318	4	7.247	205.523	4	36.824	173.184	4.05405	12	188.134	4.05405	14.911	177.718	4.10959	17.378	177.485	4.10959	23.931	216.051	4.10959	21.696	190.507	4.10959	17.857	166.035	4.28571	31.1	172.701	4.28571	14.949	208.028	4.34783	36.76	172.76
		4.5977	22.18	200.081	4.5977	24.311	164.825	4.70588	20.628	207.808	4.7619	18.91	190.707
			24.0986	198.872		25.1676	170.238		21.6484	192.691		23.8928	179.96		30.565	169.495		13.2215	197.001		27.1312	172.714		12.203	170.885		16.7222	169.225		18.202	179.737		33.0243	192.102		23.3197	183.711		17.8383	172.736		31.7278	166.63		16.0555	211.117		27.06	163.91
5-10		5.74713	24.921	195.966	5.74713	26.752	155.805	5.88235	20.531	199.965	5.95238	20.487	197.203	5.26316	19.001	182.35	5.33333	9.652	207.376	5.33333	40.981	174.058	5.40541	12.657	185.137	5.40541	13.117	180.748	5.47945	14.765	181.391	5.47945	18.349	225.827	5.47945	21.895	192.952	5.47945	17.111	161.939	5.71429	27.659	179.091	5.71429	16.698	203.137	5.7971	45.68	175.16
		6.89655	31.747	194.318	6.89655	28.534	146.757	7.05882	19.781	195.534	7.14286	29.824	202.328	6.57895	15.829	183.796	6.66667	13.073	206.596	6.66667	30.831	175.477	6.75676	14.586	170.635	6.75676	12.679	186.941	6.84932	13.107	181.997	6.84932	17.976	231.818	6.84932	21.294	195.985	6.84932	15.254	156.605	7.14286	25.409	178.226	7.14286	13.404	195.062	7.24638	48	179
		8.04598	42.262	183.866	8.04598	27.514	142.144	8.23529	18.995	197.412	8.33333	44.502	208.364	7.89474	14.181	182.593	8	16.26	208.194	8	18.974	178.432	8.10811	16.24	164.607	8.10811	13.164	196.762	8.21918	13.519	183.243	8.21918	18.596	229.516	8.21918	20.878	200.656	8.21918	16.15	154.26	8.57143	27.904	174.373	8.57143	11.34	190.011	8.69565	43.16	181.76
		9.1954	46.126	169.203	9.1954	27.889	138.441	9.41176	16.52	202.226	9.52381	53.183	199.942	9.21053	12.073	178.89	9.33333	23.137	200.497	9.33333	16.005	171.987	9.45946	14.288	160.72	9.45946	13.469	194.575	9.58904	10.88	187.417	9.58904	20.958	225.628	9.58904	21.046	201.017	9.58904	19.306	158.296	10	33.096	172.501	10	11.137	185.309
			36.264	185.838		27.6722	145.787		18.9567	198.784		36.999	201.959		15.271	181.907		15.5305	205.666		26.6977	174.988		14.4428	170.275		13.1073	189.757		13.0678	183.512		18.9698	228.197		21.2782	197.653		16.9552	157.775		28.517	176.048		13.1448	193.38		45.6133	178.64
10-15		10.3448	61.313	158.465	10.3448	31.635	136.329	10.5882	15.461	206.783	10.7143	63.151	189.158	10.5263	10.891	171.03	10.6667	33.161	185.883	10.6667	19.078	172.879	10.8108	11.468	157.634	10.8108	14.008	188.088	10.9589	7.25	180.077	10.9589	22.748	229.602	10.9589	20.255	199.857	10.9589	25.041	161.072	11.4286	38.443	168.635	11.4286	14.789	179.256	10.1449	40.44	180.96
		11.4943	96.904	158.213	11.4943	36.586	139.109	11.7647	14.223	212.462	11.9048	73.028	177.272	11.8421	10.767	158.231	12	54.654	176.493	12	25.927	171.226	12.1622	10.491	155.082	12.1622	16.215	181.455	12.3288	7.637	168.718	12.3288	26.524	232.064	12.3288	18.181	195.473	12.3288	32.125	162.904	12.8571	51.269	158.335	12.8571	21.17	176.574	11.5942	42.92	170.96
		12.6437	132.325	156.056	12.6437	42.676	141.424	12.9412	14.978	214.242	13.0952	74.115	160.541	13.1579	12.233	145.265	13.3333	80.827	164.516	13.3333	34.643	164.943	13.5135	15.209	151.197	13.5135	18.902	168.262	13.6986	13.252	160.66	13.6986	26.887	218.27	13.6986	13.697	186.33	13.6986	37.558	165.191	14.2857	71.277	150.925	14.2857	24.728	173.925	13.0435	52.2	152.28
		13.7931	164.053	148.58	13.7931	47.813	155.613	14.1176	17.994	214.775	14.2857	79.147	145.498	14.4737	14.524	136.274	14.6667	104.652	152.97	14.6667	44.499	157.403	14.8649	24.544	148.309	14.8649	22.502	150.819																			14.4928	66	135
		14.9425	187.67	139.072	14.9425	52.379	169.678
			128.453	152.077		42.2178	148.431		15.664	212.065		72.3602	168.117		12.1038	152.7		68.3235	169.965		31.0367	166.613		15.428	153.055		17.9067	172.156		9.37967	169.818		25.3863	226.645		17.3777	193.887		31.5747	163.056		53.663	159.298		20.229	176.585		50.39	159.8
15-20		16.092	175.85	131.508	16.092	59.514	166.464	15.2941	23.66	211.456	15.4762	95.917	130.054	15.7895	18.609	120.813	16	126.723	138.993	16	55.962	147.926	16.2162	37.62	139.337	16.2162	26.314	138.815	15.0685	23.907	148.454	15.0685	28.943	203.726	15.0685	10.652	177.349	15.0685	45.558	162.044	15.7143	99.997	141.453	15.7143	24.044	164.491	15.942	71.364	118.405
		17.2414	142.564	127.213	17.2414	69.134	157.025	16.4706	35.47	209.194	16.6667	110.946	116.298	17.1053	25.593	103.617	17.3333	138.987	128.939	17.3333	69.714	137.333	17.5676	50.505	123.587	17.5676	33.515	134.785	16.4384	35.965	128.801	16.4384	39.107	185.038	16.4384	10.159	160.964	16.4384	64.321	149.953	17.1429	125.981	124.24	17.1429	18.705	150.5	17.3913	73.591	104.354
		18.3908	118.902	123.121	18.3908	78.373	152.12	17.6471	47.646	206.38	17.8571	115.711	106.781	18.4211	40.151	96.43	18.6667	131.048	118.962	18.6667	98.413	126.539	18.9189	55.824	114.035	18.9189	45.08	128.737	17.8082	42.579	111.265	17.8082	52.456	155.44	17.8082	11.699	147.5	17.8082	76.854	136.014	18.5714	153.642	111.066	18.5714	15.224	128.146	18.8406	75.61	94.116
		19.5402	98.648	118.727	19.5402	95.173	148.283	18.8235	65.44	197.601	19.0476	116.781	105.206	19.7368	63.428	90.975	20	122.756	105.976	20	135.182	117.691							19.1781	62.753	95.462	19.1781	60.234	136.655	19.1781	15.342	139.613	19.1781	89.157	123.843	20	167.647	103.273	20	17.377	105.361
								20	87.387	186.824
			133.991	125.142		75.5485	155.973		51.9206	202.291		109.839	114.585		36.9453	102.959		129.879	123.218		89.8177	132.372		47.983	125.653		34.9697	134.112		41.301	120.995		45.185	170.215		11.963	156.356		68.9725	142.964		136.817	120.008		18.8375	137.124		73.5217	105.625
20-25		20.6897	90.353	117.176	20.6897	124.899	138.855	21.1765	109.003	178.158	20.2381	101.289	110.136	21.0526	90.103	89.578	21.3333	116.27	93.038	21.3333	138.243	112.05	20.2703	58.646	101.388	20.2703	55.277	114.488	20.5479	80.472	81.538	20.5479	55.46	120.781	20.5479	22.723	127.801	20.5479	100.683	110.595	21.4286	165.089	96.786	21.4286	20.446	87.036	20.2899	75.238	87.58
		21.8391	92.697	118.091	21.8391	145.292	133.183	22.3529	121.516	169.287	21.4286	75.13	115.874	22.3684	109.202	92.033	22.6667	109.214	86.931	22.6667	112.936	105.004	21.6216	62.726	89.407	21.6216	55.593	104.496	21.9178	87.392	71.907	21.9178	60.371	107.254	21.9178	43.346	119.674	21.9178	100.19	98.337	22.8571	164.606	91.297	22.8571	28.498	73.797	21.7391	74.663	86.184
		22.9885	86.593	115.975	22.9885	153.845	130.881	23.5294	121.713	168.698	22.619	54.732	119.67	23.6842	110.944	93.616	24	107.87	84.746	24	92.635	102.623	22.973	73.273	79.122	22.973	56.412	102.657	23.2877	87.034	67.166	23.2877	75.632	97.574	23.2877	75.846	114.881	23.2877	89.005	88.27	24.2857	161.244	88.444	24.2857	36.172	66.537	23.1884	76.532	88.653
		24.1379	76.553	112.254	24.1379	157.088	124.036	24.7059	112.273	166.26	23.8095	58.339	120.359	25	97.184	96.865							24.3243	79.26	72.612	24.3243	60.319	103.149	24.6575	83.202	68.629	24.6575	90.403	93.373	24.6575	112.768	112.973	24.6575	74.086	82.38							24.6377	86.393	94.607
											25	67.956	119.382
			86.549	115.874		145.281	131.739		116.126	170.601		71.4892	117.084		101.858	93.023		111.118	88.2383		114.605	106.559		68.4762	85.6322		56.9002	106.197		84.525	72.31		70.4665	104.746		63.6707	118.832		90.991	94.8955		163.646	92.1757		28.372	75.79		78.2065	89.256
25-30		25.2874	69.262	112.145	25.2874	155.285	113.112	25.8824	101.84	153.865	26.1905	77.442	115.89	26.3158	79.502	99.257	25.3333	102.535	83.141	25.3333	82.861	102.988	25.6757	74.451	66.767	25.6757	68.226	101.705	26.0274	81.264	70.676	26.0274	109.17	94.028	26.0274	138.323	112.552	26.0274	60.758	81.365	25.7143	157.484	85.599	25.7143	42.826	63.728	26.087	89.823	98.754
		26.4368	67.678	114.587	26.4368	151.882	102.593	27.0588	107.458	145.441	27.381	87.282	109.567	27.6316	75.933	94.951	26.6667	92.798	81.768	26.6667	79.656	102.417	27.027	67.486	64.991	27.027	78.597	97.937	27.3973	81.402	73.624	27.3973	121.051	95.66	27.3973	139.75	112.008	27.3973	55.395	83.594	27.1429	151.457	78.927	27.1429	54.695	65.761	27.5362	82.367	96.974
		27.5862	77.566	116.546	27.5862	156.561	101.608	28.2353	106.27	142.704	28.5714	92.245	109.445	28.9474	82.391	91.168	28	81.609	84.492	28	79.392	100.765	28.3784	58.069	65.877	28.3784	80.169	97.157	28.7671	76.217	77.574	28.7671	125.112	94.626	28.7671	127.973	108.556	28.7671	54.014	84	28.5714	131.264	77.085	28.5714	64.665	71.864	28.9855	70.723	95.368
		28.7356	92.295	116.385	28.7356	154.829	100.658	29.4118	96.231	143.773	29.7619	95.771	114.506	30.2632	95.234	90.729	29.3333	80.3	91.796	29.3333	86.189	102.111	29.7297	59.092	65.62	29.7297	78.825	96.274													30	96.867	78.481	30	65.791	78.413
		29.8851	108.289	116.994	29.8851	147.452	103.198
			83.018	115.331		153.202	104.234		102.95	146.446		88.185	112.352		83.265	94.0262		89.3105	85.2993		82.0245	102.07		64.7745	65.8137		76.4542	98.2682		79.6277	73.958		118.444	94.7713		135.349	111.039		56.7223	82.9863		134.268	80.023		56.9943	69.9415		80.971	97.032
30-35		31.0345	111.788	118.386	31.0345	145.03	105.077	30.5882	94.03	137.716	30.9524	92.999	114.915	31.5789	91.14	88.057	30.6667	99.561	99.37	30.6667	89.533	99.167	31.0811	69.669	67.344	31.0811	78.173	95.428	30.137	73.448	77.521	30.137	113.078	92.395	30.137	112.794	104.344	30.137	59.554	90.493	31.4286	67.024	79.766	31.4286	69.207	84.314	30.4348	65.001	95.774
		32.1839	97.02	115.7	32.1839	150.247	104.957	31.7647	108.911	130.945	32.1429	94.718	117.944	32.8947	86.92	88.446	32	112.347	104.989	32	108.844	96.115	32.4324	80.425	69.781	32.4324	69.559	94.226	31.5068	65.944	80.073	31.5068	96.25	92.795	31.5068	108.032	98.657	31.5068	66.895	92.641	32.8571	59.034	78.474	32.8571	73.825	89.213	31.8841	63.161	96.496
		33.3333	74.02	113.3	33.3333	158.473	103.353	32.9412	135.924	124.882	33.3333	93.025	124.424	34.2105	78.109	96.523	33.3333	111.153	110.493	33.3333	131.025	92.837	33.7838	79.482	69.594	33.7838	68.402	95.27	32.8767	62.451	88.529	32.8767	96.229	91.284	32.8767	110.086	96.298	32.8767	71.946	89.774	34.2857	63.52	77.173	34.2857	76.315	89.245	33.3333	60.397	94.249
		34.4828	55.18	118.04	34.4828	163.649	103.787	34.1176	155.126	118.467	34.5238	76.763	122.516	35.5263	76.456	97.565	34.6667	89.251	113.641	34.6667	135.552	91.279							34.2466	67.225	92.693	34.2466	104.49	89.416	34.2466	114.027	97.633	34.2466	73.127	88.796							34.7826	59.239	91.551
			84.502	116.357		154.35	104.293		123.498	128.002		89.3762	119.95		83.1562	92.6477		103.078	107.123		116.239	94.8495		76.5253	68.9063		72.0447	94.9747		67.267	84.704		102.512	91.4725		111.235	99.233		67.8805	90.426		63.1927	78.471		73.1157	87.5907		61.9495	94.5175
35-40		35.6322	50.26	121.78	35.6322	161.468	107.687	35.2941	140.012	115.215	35.7143	62.983	119.626	36.8421	78.758	93.369	36	76.341	112.357	36	126.953	89.683	35.1351	82.576	70.494	35.1351	74.065	96.065	35.6164	70.389	94.178	35.6164	118.882	89.784	35.6164	104.831	97.719	35.6164	62.737	88.694	35.7143	85.625	77.001	35.7143	76.664	87.159	36.2319	63.295	95.841
		36.7816	50.74	125.04	36.7816	158.758	109.104	36.4706	111.906	114.802	36.9048	55.19	121.566	38.1579	71.411	89.128	37.3333	76.453	106.832	37.3333	109.835	89.768	36.4865	92.593	75.042	36.4865	68.863	91.262	36.9863	73.039	97.737	36.9863	114.177	90.834	36.9863	85.597	95.012	36.9863	58.481	87.434	37.1429	117.885	74.169	37.1429	76.766	86.046	37.6812	75.614	103.567
		37.931	51.3	128.78	37.931	160.942	111.059	37.6471	97.9	120.05	38.0952	49.791	125.06	39.4737	56.928	86.189	38.6667	82.896	102.981	38.6667	105.464	91.141	37.8378	94.792	75.499	37.8378	56.192	88.992	38.3562	67.632	100.46	38.3562	109.001	93.789	38.3562	64.856	93.96	38.3562	61.967	88.182	38.5714	147.774	73.112	38.5714	78.764	86.383	39.1304	88.757	108.967
		39.0805	59.68	131.52	39.0805	168.697	111.284	38.8235	88.11	123.79	39.2857	45.613	128.518				40	88.599	100.311	40	102.933	92.86	39.1892	93.342	75.401	39.1892	54.953	86.969	39.726	58.995	100.8	39.726	105.493	96.286	39.726	60.285	93.281	39.726	73.428	88.551	40	155.842	70.652	40	84.763	87.651
								40	79.74	123.21
			52.995	126.78		162.466	109.784		103.534	119.413		53.3942	123.692		69.0323	89.562		81.0722	105.62		111.296	90.863		90.8257	74.109		63.5183	90.822		67.5138	98.2938		111.888	92.6732		78.8922	94.993		64.1532	88.2152		126.781	73.7335		79.2392	86.8098		75.8887	102.792
40-45		40.2299	77.94	134.82	40.2299	186.551	111.376	41.1765	77.31	124.21	40.4762	46.562	131.381	40.7895	52.611	89.505	41.3333	88.272	97.282	41.3333	88.606	92.661	40.5405	92.19	73.157	40.5405	52.45	88.69	41.0959	54.141	101.74	41.0959	100.202	97.492	41.0959	69.378	94.893	41.0959	99.107	88.571	41.4286	162.19	69.551	41.4286	89.773	89.193	40.5797	105.336	113.982
		41.3793	97.72	141.56	41.3793	188.511	111.84	42.3529	88.1	124.58	41.6667	50.868	135.496	42.1053	60.174	93.476	42.6667	85.41	96.257	42.6667	75.118	94.194	41.8919	87.89	73.725	41.8919	54.411	89.888	42.4658	53.733	102.526	42.4658	105.761	97.071	42.4658	86.571	97.803	42.4658	118.76	90.659	42.8571	155.666	69.267	42.8571	83.627	89.44	42.029	119.547	117.502
		42.5287	114	143.92	42.5287	166.416	109.336	43.5294	98.1	122.79	42.8571	62.543	137.872	43.4211	78.593	97.32	44	84.112	96.876	44	67.704	98.469	43.2432	90.435	75.377	43.2432	54.822	90.64	43.8356	58.847	99.496	43.8356	124.279	99.594	43.8356	99	100.028	43.8356	126.81	94.91	44.2857	144.796	66.243	44.2857	87.274	90.984	43.4783	123.047	117.04
		43.6782	114.78	137.48	43.6782	166.942	104.832	44.7059	109.99	121.37	44.0476	69.088	133.931	44.7368	96.779	98.654							44.5946	89.102	77.157	44.5946	62.927	91.669																			44.9275	117.254	114.95
		44.8276	115.44	133.66	44.8276	173.406	102.484
			103.976	138.288		176.365	107.974		93.375	123.237		57.2653	134.67		72.0392	94.7387		85.9313	96.805		77.1427	95.108		89.9042	74.854		56.1525	90.2218		55.5737	101.254		110.081	98.0523		84.983	97.5747		114.892	91.38		154.217	68.3537		86.8913	89.8723		116.296	115.868
45-50		45.977	113.204	126.486	45.977	160.346	100.984	45.8824	128.99	118.79	45.2381	75.457	132.105	46.0526	103.25	102.032	45.3333	96.718	98.887	45.3333	69.722	103.571	45.9459	85.213	81.454	45.9459	75.044	93.497	45.2055	66.782	100.266	45.2055	145.68	100.418	45.2055	92.501	101.357	45.2055	128.55	94.999	45.7143	133.026	63.67	45.7143	86.962	92.697	46.3768	102.849	111.749
		47.1264	121.071	122.278	47.1264	147.899	103.332	47.0588	141.48	117.58	46.4286	92.847	136.818	47.3684	104.47	105.855	46.6667	109.748	100.026	46.6667	74.868	106.4	47.2973	74.287	84.328	47.2973	79.139	92.084	46.5753	69.445	100.095	46.5753	143.599	98.44	46.5753	82.79	102.128	46.5753	120.502	93.498	47.1429	127.341	63.271	47.1429	81.229	95.129	47.8261	91.581	112.151
		48.2759	124.034	112.944	48.2759	131.531	106.094	48.2353	129.06	114.95	47.619	108.712	135.196	48.6842	91.266	102.071	48	109.833	103.383	48	86.296	110.505	48.6486	60.622	82.436	48.6486	80.178	88.77	47.9452	62.254	96.549	47.9452	134.917	95.168	47.9452	83.71	104.174	47.9452	106.685	91.998	48.5714	114.679	68.346	48.5714	81.308	93.229	49.2754	77.372	113.992
		49.4253	114.299	107.859	49.4253	114.687	105.043	49.4118	115.06	110.79	48.8095	119.34	132.776	50	72.378	94.855	49.3333	104.647	101.8	49.3333	98.367	111.685	50	55.443	82.025	50	79.08	86.794	49.3151	57.314	93.76	49.3151	117.592	94.349	49.3151	94.842	104.834	49.3151	106.055	96.223	50	114.137	74.393	50	88.23	93.34
											50	117.739	138.415
			118.152	117.392		138.616	103.863		128.648	115.528		102.819	135.062		92.841	101.203		105.236	101.024		82.3132	108.04		68.8912	82.5607		78.3602	90.2862		63.9487	97.6675		135.447	97.0938		88.4607	103.123		115.448	94.1795		122.296	67.42		84.4323	93.5987		90.6007	112.631
50-55		50.5747	91.052	105.509	50.5747	101.316	105.703	50.5882	100.85	111.05	51.1905	108.247	142.249	51.3158	57.404	89.458	50.6667	88.703	103.494	50.6667	101.459	107.783	51.3514	63.394	79.378	51.3514	73.269	84.812	50.6849	50.75	92.705	50.6849	102.079	94.232	50.6849	104.144	100.85	50.6849	119.929	104.424	51.4286	100.491	80.798	51.4286	97.045	94.135	50.7246	67.172	118.058
		51.7241	67.966	101.973	51.7241	89.751	104.043	51.7647	89.63	114.37	52.381	92.656	137.11	52.6316	48.034	87.102	52	66.544	103.772	52	105.281	110.05	52.7027	77.111	78.185	52.7027	68.038	84.044	52.0548	54.739	97.958	52.0548	83.922	96.766	52.0548	105.523	94.886	52.0548	143.408	105.891	52.8571	85.426	85.781	52.8571	109.698	94.495	52.1739	63.771	121.75
		52.8736	74.13	101.825	52.8736	85.819	99.717	52.9412	93.47	110.53	53.5714	76.862	128.303	53.9474	45.402	88.179	53.3333	45.487	101.089	53.3333	106.733	112.624	54.0541	85.742	80.519	54.0541	67.17	86.15	53.4247	74.559	103.317	53.4247	70.429	102.544	53.4247	93.624	90.589	53.4247	169.763	106.123	54.2857	76.229	86.35	54.2857	123.821	94.069	53.6232	61.466	120.398
		54.023	95.562	105.568	54.023	85.723	100.19	54.1176	97.95	104.16	54.7619	67.116	121.802	55.2632	50.244	86.978	54.6667	30.652	98.685	54.6667	105.821	111.425							54.7945	106.754	103.712	54.7945	72.812	111.153	54.7945	78.605	87.234	54.7945	168.663	104.361
			82.1775	103.719		90.6523	102.413		95.475	110.028		86.2202	132.366		50.271	87.9293		57.8465	101.76		104.823	110.471		75.4157	79.3607		69.4923	85.002		71.7005	99.423		82.3105	101.174		95.474	93.3897		150.441	105.2		87.382	84.3097		110.188	94.233		64.1363	120.069
55-60		55.1724	123.2	110.335	55.1724	88.826	100.97	55.2941	94	100.37	55.9524	66.281	115.602	56.5789	63.045	81.844	56	21.093	97.178	56	101.967	105.928	55.4054	90.382	79.773	55.4054	73.819	88.168	56.1644	128.591	106.973	56.1644	87.732	110.208	56.1644	75.961	85.894	56.1644	134.821	101.189	55.7143	66.801	81.816	55.7143	157.491	92.231	55.0725	60.734	109.025
		56.3218	133.684	111.085	56.3218	95.141	99.753	56.4706	94.84	97.58	57.1429	76.565	110.586	57.8947	80.658	79.844	57.3333	18.055	90.872	57.3333	95.185	100.478	56.7568	78.478	79.148	56.7568	83.346	89.163	57.5342	120.018	113.435	57.5342	107.526	101.656	57.5342	83.984	91.075	57.5342	97.261	102.056	57.1429	57.673	75.688	57.1429	177.894	94.89	56.5217	60.277	99.605
		57.4713	126.757	109.776	57.4713	109.837	103.604	57.6471	98	96.84	58.3333	95.307	106.43	59.2105	103.346	81.949	58.6667	11.561	84.974	58.6667	78.431	92.97	58.1081	55.204	78.594	58.1081	92.702	89.557	58.9041	103.22	111.833	58.9041	119.266	96.347	58.9041	100.325	92.726	58.9041	73.103	101.885	58.5714	51.982	70.056	58.5714	165.055	94.119	57.971	51.932	87.864
		58.6207	103.46	104.737	58.6207	121.888	107.189	58.8235	98.63	99.79	59.5238	110.818	107.014	60.5263	106.262	85.348	60	8.061	79.722	60	54.316	81.834	59.4595	38.97	76.83	59.4595	111.111	88.963													60	39.175	66.033	60	143.959	91.222	59.4203	44.041	79.894
		59.7701	69.389	98.526	59.7701	111.513	106.905	60	101.42	98.79
			111.298	106.892		105.441	103.684		97.378	98.674		87.2428	109.908		88.3278	82.2463		14.6925	88.1865		82.4748	95.3025		65.7585	78.5862		90.2445	88.9627		117.276	110.747		104.841	102.737		86.7567	89.8983		101.728	101.71		53.9078	73.3983		161.1	93.1155		54.246	94.097
60-65		60.9195	38.116	95.179	60.9195	90.262	107.213	61.1765	99.43	97.58	60.7143	124.789	107.261	61.8421	96.12	83.699	61.3333	6.607	77.005	61.3333	32.243	78.27	60.8108	32.87	73.024	60.8108	133.853	88.728	60.274	83.561	105.82	60.274	109.934	92.263	60.274	121.014	89.99	60.274	54.915	96.087	61.4286	24.702	61.654	61.4286	124.757	87.724	60.8696	32.854	71.787
		62.069	16.397	93.225	62.069	64.644	104.055	62.3529	81.38	95.16	61.9048	108.609	101.773	63.1579	90.076	79.15	62.6667	7.778	76.858	62.6667	18.11	75.923	62.1622	27.064	70.487	62.1622	135.499	87.592	61.6438	55.774	102.5	61.6438	97.64	88.112	61.6438	127.366	86.276	61.6438	40.913	90.602	62.8571	23.669	58.806	62.8571	101.761	84.401	62.3188	21.342	70.749
		63.2184	10.274	91.813	63.2184	41.112	91.787	63.5294	60.43	91.16	63.0952	83.973	91.617	64.4737	85.897	74.15	64	15.048	77.894	64	14.689	72.181	63.5135	23.642	68.582	63.5135	120.534	84.005	63.0137	44.13	95.81	63.0137	89.636	81.513	63.0137	107.839	82.378	63.0137	30.659	85.287	64.2857	30.335	58.672	64.2857	74.916	81.221	63.7681	15.292	71.27
		64.3678	8.411	96.156	64.3678	28.435	81.433	64.7059	45.11	87.16	64.2857	60.99	81.71										64.8649	23.836	67.607	64.8649	101.635	83.45	64.3836	39.513	92.543	64.3836	90.073	77.706	64.3836	76.342	74.042	64.3836	23.642	79.246
			18.2995	94.0932		56.1133	96.122		71.5875	92.765		94.5902	95.5902		90.6977	78.9997		9.811	77.2523		21.6807	75.458		26.853	69.925		122.88	85.9437		55.7445	99.1683		96.8208	84.8985		108.14	83.1715		37.5322	87.8055		26.2353	59.7107		100.478	84.4487		23.1627	71.2687
65-70		65.5172	8.455	99.174	65.5172	21.6	73.589	65.8824	38	83.37	65.4762	38.37	75.95	65.7895	89.451	67.025	65.3333	31.009	75.928	65.3333	19.411	67.644	66.2162	25.469	65.91	66.2162	80.164	77.157	65.7534	31.189	91.904	65.7534	89.891	69.91	65.7534	49.895	64.017	65.7534	21.147	74.061	65.7143	41.038	61.19	65.7143	49.655	78.068	65.2174	12.392	72.721
		66.6667	12.591	101.127	66.6667	13.291	64.281	67.0588	38.84	81.42	66.6667	17.8	77.43	67.1053	86.873	62.706	66.6667	50.293	71.49	66.6667	24.186	68.554	67.5676	29.251	67.107	67.5676	72.162	67.734	67.1233	17.898	91.04	67.1233	90.479	66.136	67.1233	33.479	56.433	67.1233	20.228	69.982	67.1429	59.284	61.486	67.1429	25.517	75.959	66.6667	12.749	73.813
		67.8161	19.544	103.28	67.8161	9.287	58.551	68.2353	43.89	83.63	67.8571	4.28	82.05	68.4211	78.201	60.595	68	81.845	70.515	68	30.396	68.865	68.9189	37.781	71.175	68.9189	65.554	61.845	68.4932	9.986	94.652	68.4932	86.503	63.708	68.4932	25.75	52.002	68.4932	20.117	65.723	68.5714	78.276	61.141	68.5714	7.334	73.757	68.1159	15.066	73.683
		68.9655	22.721	102.647	68.9655	7.287	54.934	69.4118	53.397	86.151	69.0476	0.38	90.29	69.7368	58.835	62.446	69.3333	114.05	69.611	69.3333	38.947	69.402							69.863	6.188	102.094	69.863	71.663	59.963	69.863	28.466	54.899	69.863	23.053	63.676	70	95.819	64.477	70	0.08	73.68	69.5652	20.469	73.351
			15.8278	101.557		12.8663	62.8387		43.5318	83.6428		15.2075	81.43		78.34	63.193		69.2993	71.886		28.235	68.6162		30.8337	68.064		72.6267	68.912		16.3153	94.9225		84.634	64.9292		34.3975	56.8377		21.1363	68.3605		68.6043	62.0735		20.6465	75.366		15.169	73.392
70-75		70.1149	31.391	100.954	70.1149	4.251	53.581	70.5882	66.396	85.203	70.2381	0	99.29	71.0526	32.123	67.948	70.6667	119.494	72.035	70.6667	48.266	71.544	70.2703	50.583	76.329	70.2703	68.638	59.937	71.2329	5.836	108.11	71.2329	51.302	61.389	71.2329	41.866	63.373	71.2329	30.842	65.402	71.4286	102.402	69.344	71.4286	2.981	73.783	71.0145	38.981	74.053
		71.2644	49.935	99.717	71.2644	2.243	52.663	71.7647	79.964	82.725	71.4286	3.24	100.19	72.3684	17.53	74.097	72	123.907	75.181	72	59.018	73.302	71.6216	59.484	78.091	71.6216	67.402	59.124	72.6027	10.383	113.353	72.6027	42.851	63.226	72.6027	59.327	72.568	72.6027	42.115	67.801	72.8571	113.655	72.384	72.8571	11.747	71.808	72.4638	63.238	78.366
		72.4138	72.392	97.219	72.4138	2.784	52.644	72.9412	98.207	80.708	72.619	17.77	95.14	73.6842	19.81	76.486	73.3333	127.879	76.862	73.3333	64.424	75.33	72.973	73.588	78.15	72.973	66.631	57.793	73.9726	18.404	118.346	73.9726	35.225	65.419	73.9726	74.084	82.406	73.9726	59.265	72.711	74.2857	119.639	74.581	74.2857	25.252	71.588	73.913	90.939	81.657
		73.5632	94.004	89.82	73.5632	6.192	54.289	74.1176	103.647	75.656	73.8095	35.58	93.19	75	29.685	79.311	74.6667	133.119	76.546	74.6667	57.791	77.219	74.3243	98.075	80.42	74.3243	51.298	55.117
		74.7126	104.1	89	74.7126	15.945	58.505				75	62.49	93.81
			70.3644	95.342		6.283	54.3364		87.0535	81.073		23.816	96.324		24.787	74.4605		126.1	75.156		57.3747	74.3487		70.4325	78.2475		63.4923	57.9928		11.541	113.27		43.126	63.3447		58.4257	72.7823		44.074	68.638		111.899	72.103		13.3267	72.393		64.386	78.0253
75-80		75.8621	121.2	87.2	75.8621	34.09	64.996	75.2941	102.502	74.019	76.1905	85.82	90.76	76.3158	42.976	82.193	76	142.539	75.412	76	63.332	79.92	75.6757	119.058	83.489	75.6757	30.954	53	75.3425	30.003	115.431	75.3425	35.185	67.597	75.3425	75.688	86.782	75.3425	85.038	77.67	75.7143	110.78	74.221	75.7143	41.838	72.598	75.3623	107.753	89.588
		77.0115	158.1	87	77.0115	65.269	72.422	76.4706	107.352	79.375	77.381	98.91	89.19	77.6316	53.501	87.639	77.3333	142.042	76.635	77.3333	78.876	83.687	77.027	134.763	87.661	77.027	19.265	53.121	76.7123	44.142	114.325	76.7123	42.481	70.005	76.7123	70.528	89.045	76.7123	110.951	81.057	77.1429	94.123	76.619	77.1429	55.992	74.495	76.8116	113.082	95.246
		78.1609	169.2	85.2	78.1609	110.444	79.988	77.6471	112.162	85.012	78.5714	111.53	89.81	78.9474	64.665	93.211	78.6667	127.663	79.965	78.6667	93.507	86.011	78.3784	125.202	90.541	78.3784	17.582	54.677	78.0822	54.442	112.911	78.0822	62.16	77.446	78.0822	66.96	87.285	78.0822	126.078	86.788	78.5714	80.403	79.73	78.5714	62.777	75.763	78.2609	113.227	96.924
		79.3103	151.1	87.7	79.3103	155.262	87.344	78.8235	117.315	91.587	79.7619	124.53	88.38				80	115.068	82.751	80	106.77	87.989	79.7297	101.036	94.304	79.7297	23.271	55.631	79.4521	57.639	106.541	79.4521	80	82.181	79.4521	64.467	83.293	79.4521	125.741	91.884	80	79.853	78.571	80	67.435	72.871	79.7101	106.111	94.818
								80	127.688	96.797
			149.9	86.775		91.2662	76.1875		113.404	85.358		105.197	89.535		53.714	87.681		131.828	78.6908		85.6213	84.4017		120.015	88.9988		22.768	54.1073		46.5565	112.302		54.9565	74.3072		69.4107	86.6012		111.952	84.3498		91.2898	77.2852		57.0105	73.9318		110.043	94.144
80-85		80.4598	127.4	92.5	80.4598	190.458	90.043	81.1765	145.979	95.218	80.9524	143.2	83.14	80.2632	75.422	94.886	81.3333	103.282	83.126	81.3333	106.622	86.744	81.0811	84.26	98.547	81.0811	32.811	56.362	80.8219	55.033	103.279	80.8219	101.467	85.078	80.8219	71.158	80.59	80.8219	115.498	95.006	81.4286	77.416	75.713	81.4286	73.785	70.214	81.1594	99.119	93.25
		81.6092	101.6	98.4	81.6092	213.864	88.313	82.3529	151.198	91.07	82.1429	153.48	79.57	81.5789	79.54	87.754	82.6667	84.871	86.312	82.6667	96.521	80.58	82.4324	74.313	99.844	82.4324	41.705	55	82.1918	53.844	97.609	82.1918	117.305	87.055	82.1918	86.835	78.139	82.1918	98.654	95.748	82.8571	75.448	69.415	82.8571	81.642	69.083	82.6087	100.589	92.543
		82.7586	96.3	102.6	82.7586	214.152	90.173	83.5294	145.151	88.704	83.3333	135.56	80.62	82.8947	76.523	78.767	84	68.295	87.881	84	77.422	76.002	83.7838	71.855	100.439	83.7838	44.406	55.038	83.5616	46.855	93.52	83.5616	125.77	87.921	83.5616	107.73	78.976	83.5616	78.339	98.6	84.2857	75.594	63.763	84.2857	85.846	67.701	84.058	103.853	88.258
		83.908	100.5	106.6	83.908	186.109	92.045	84.7059	129.895	88.754	84.5238	109.94	85.05	84.2105	82.428	81.406													84.9315	45.76	93.12	84.9315	136.088	89.713	84.9315	107.855	84.912	84.9315	68.646	100.198
			106.45	100.025		201.146	90.1435		143.056	90.9365		135.545	82.095		78.4783	85.7032		85.4827	85.773		93.5217	81.1087		76.8093	99.61		39.6407	55.4667		50.373	96.882		120.157	87.4418		93.3945	80.6542		90.2843	97.388		76.1527	69.6303		80.4243	68.9993		101.187	91.3503
85-90		85.0575	113.6	108.8	85.0575	168.22	92.939	85.8824	116.186	90.809	85.7143	93.66	91.67	85.5263	96.417	80.71	85.3333	66.545	87.736	85.3333	64.712	72.312	85.1351	76.67	98.563	85.1351	45.986	55.644	86.3014	49.52	92.174	86.3014	157.311	92.632	86.3014	83.891	88.123	86.3014	81.675	97.158	85.7143	73.83	62.569	85.7143	94.046	64.962	85.5072	98.698	84.357
		86.2069	118.6	107.2	86.2069	148.2	91.12	87.0588	111.723	90.997	86.9048	76.42	92.19	86.8421	108.169	79.279	86.6667	68.496	89.905	86.6667	56.847	69.491	86.4865	73.716	96.517	86.4865	54.466	56.802	87.6712	56.381	88.983	87.6712	181.466	94.671	87.6712	64.11	90.786	87.6712	99.234	96.367	87.1429	75.762	60.903	87.1429	104.892	62.503	86.9565	89.335	84.073
		87.3563	125.3	104.3	87.3563	137.6	89.12	88.2353	118.084	89.608	88.0952	72.19	88.76	88.1579	94.514	81.822	88	62.975	87.101	88	54.27	71.622	87.8378	68.8	95.205	87.8378	71.279	59.653	89.0411	67.708	87.798	89.0411	173.499	92.47	89.0411	57.35	94.389	89.0411	116.193	99.017	88.5714	75.227	57.112	88.5714	108.525	60.9	88.4058	78.802	85.768
		88.5057	108	100.4	88.5057	131.36	87.12	89.4118	126.607	87.987	89.2857	73.62	89.62	89.4737	81.601	83.92	89.3333	57.716	84.503	89.3333	53.88	76.128	89.1892	70.464	93.388	89.1892	93.99	64.002													90	94.221	55.755	90	96.698	63.961	89.8551	66.639	88.804
		89.6552	91.6	100	89.6552	115.96	77.6
			111.42	104.14		140.268	87.5798		118.15	89.8502		78.9725	90.56		95.1753	81.4327		63.933	87.3113		57.4273	72.3882		72.4125	95.9183		66.4303	59.0252		57.8697	89.6517		170.759	93.2577		68.4503	91.0993		99.034	97.514		79.76	59.0847		101.04	63.0815		83.3685	85.7505
90-95		90.8046	84.6	96.4	90.8046	95.26	78.88	90.5882	142.52	84.419	90.4762	69.14	96.48	90.7895	72.805	79.686	90.6667	55.42	86.345	90.6667	51.019	76.949	90.5405	74.133	90.522	90.5405	116.408	69.134	90.411	80.734	89.137	90.411	164.022	91.254	90.411	62.832	95.035	90.411	120.385	101.187	91.4286	153.625	60.851	91.4286	77.968	69.667	91.3043	60.22	91.374
		91.954	88.5	97.8	91.954	82.72	81.82	91.7647	166.121	80.675	91.6667	68	95.57	92.1053	65.291	74.693	92	49.544	87.518	92	46.667	75.073	91.8919	77.557	90.246	91.8919	127.865	71.233	91.7808	91.772	91.325	91.7808	143.911	92.948	91.7808	80.063	92.317	91.7808	109.662	101.186	92.8571	207.662	70.157	92.8571	67.152	73.881	92.7536	60.071	91.675
		93.1034	106.1	100.7	93.1034	73.54	81.06	92.9412	180.898	78.636	92.8571	76.1	95	93.4211	57.746	73.282	93.3333	55.654	87.205	93.3333	44.439	74.745	93.2432	80.03	90.268	93.2432	121.704	74.743	93.1507	96.567	91.868	93.1507	111.381	96.962	93.1507	95.732	87.491	93.1507	89.746	100.991	94.2857	218.118	77.38	94.2857	66.903	75.662	94.2029	59.331	90.031
		94.2529	111.6	103.7	94.2529	78.64	87.58	94.1176	195.952	77.834	94.0476	95.82	91.76	94.7368	57.431	77.829	94.6667	73.5	84.236	94.6667	39.463	75.16	94.5946	84.559	88.812	94.5946	101.542	79.342	94.5205	96.821	92.607	94.5205	100.21	102.682	94.5205	102.748	88.916	94.5205	66.198	102.095
			97.7	99.65		82.54	82.335		171.373	80.391		77.265	94.7025		63.3183	76.3725		58.5295	86.326		45.397	75.4818		79.0697	89.962		116.88	73.613		91.4735	91.2343		129.881	95.9615		85.3438	90.9397		96.4977	101.365		193.135	69.4627		70.6743	73.07		59.874	91.0267
95-100		95.4023	121.9	104.9	95.4023	94.04	100.22	95.2941	197.391	75.692	95.2381	115.39	91	96.0526	67.01	78.916	96	94.154	83.19	96	33.274	74.352	95.9459	87.018	89.469	95.9459	87.198	83.78	95.8904	105.098	93.473	95.8904	96.853	108.712	95.8904	102.382	93.785	95.8904	50.149	103.856	95.7143	179.92	81.399	95.7143	67.524	79.828	95.6522	58.022	90.161
		96.5517	130.2	109.5	96.5517	112.86	103.82	96.4706	179.957	70.897	96.4286	115.76	89.38	97.3684	74.799	83.694	97.3333	116.381	85.456	97.3333	25.294	71.994	97.2973	83.68	90.281	97.2973	77.553	93.257	97.2603	110.791	93.622	97.2603	95.533	114	97.2603	103.904	93.977	97.2603	45.2	105.527	97.1429	128.018	79.729	97.1429	68.73	83.195	97.1014	58.039	92.39
		97.7011	104.9	119	97.7011	109.3	104	97.6471	159.802	70.14	97.619	112.57	84.95	98.6842	90.193	87.598	98.6667	127.399	86.119	98.6667	22.153	71.962	98.6486	76.374	92.371	98.6486	80.822	97.759	98.6301	105.103	97.733	98.6301	91.374	110.466	98.6301	99.378	88.797	98.6301	40.418	107.781	98.5714	92.371	80.57	98.5714	77.307	79.538	98.5507	57.858	92.771
		98.8506	83.1	124.5	98.8506	85.5	102.12	98.8235	145.578	72.738	98.8095	113.62	84.81	100	90.248	86.172	100	127.29	85.427	100	22.5	65.5	100	69.836	97.851	100	90.839	100.452	100	90.895	101.65	100	83.611	100.709	100	82.542	81.97	100	32.658	108.661	100	75.091	77.107	100	84.436	74.026	100	55.943	93.691
		100	59.4	124.1	100	60.5	98.24	100	126.624	74.958	100	108.33	86.62
			99.9	116.4		92.44	101.68		161.87	72.885		113.134	87.352		80.5625	84.095		116.306	85.048		25.8053	70.952		79.227	92.493		84.103	93.812		102.972	96.6195		91.8427	108.472		97.0515	89.6322		42.1063	106.456		118.85	79.7012		74.4993	79.1467		57.4655	92.2533
[truncated: 66 more columns]

## Sheet: Summary
% Chromosome Length		Mean	STDDEV	SEM
5	FISH	22.4734	7.17556	1.16403
	PI	178.418	15.4008	2.49835
10	FISH	23.7671	15.0072	2.43449
	PI	183.853	19.877	3.22448
15	FISH	37.0474	26.4298	4.28748
	PI	171.343	23.4292	3.80072
20	FISH	65.912	44.0259	7.14195
	PI	136.654	25.8437	4.19239
25	FISH	90.418	38.5187	6.24857
	PI	104.205	23.4146	3.79835
30	FISH	99.1118	37.3718	6.0625
	PI	94.1747	18.7395	3.03995
35	FISH	100.402	31.9863	5.18886
	PI	94.9029	16.0806	2.60862
40	FISH	96.3046	33.5701	5.44579
	PI	95.844	15.5991	2.5305
45	FISH	102.876	31.4538	5.10249
	PI	98.3148	16.9688	2.75271
50	FISH	98.8641	22.1139	3.58735
	PI	97.6771	14.3933	2.3349
55	FISH	96.5394	31.0707	5.04033
	PI	97.0146	15.6264	2.53493
60	FISH	95.8042	35.8906	5.82223
	PI	93.4001	15.574	2.52643
65	FISH	65.6714	38.0798	6.17735
	PI	82.9351	15.2698	2.47708
70	FISH	45.9483	26.1538	4.24271
	PI	74.5553	16.1326	2.61706
75	FISH	55.7362	31.5879	5.12423
	PI	76.1341	16.5842	2.69031
80	FISH	76.0833	37.8199	6.13521
	PI	78.3284	16.6663	2.70363
85	FISH	94.6641	31.8386	5.16491
	PI	84.2111	13.5028	2.19044
90	FISH	97.5493	30.4293	4.93628
	PI	84.7099	14.3628	2.32995
95	FISH	93.8353	34.9321	5.66673
	PI	89.4271	12.319	1.99841
100	FISH	81.8174	28.994	4.70345
	PI	93.3443	15.0269	2.43769
