# Supplementary material for: Large domains of heterochromatin direct the formation of short mitotic chromosome loops
Source: eLife. 2020 Sep 11;9:e57212. doi: 10.7554/eLife.57212 (PMC7515631; doi:10.7554/eLife.57212)
Supplement: Figure 1—figure supplement 1—source data 2. [file elife-57212-fig1-figsupp1-data2.xlsx]

## Sheet: All Values
1	FISH	PI	2	FISH	PI	3	FISH	PI	4	FISH	PI	5	FISH	PI	6	FISH	PI	7	FISH	PI	9	FISH	PI	10	FISH	PI	11	FISH	PI	12	FISH	PI	13	FISH	PI	14	FISH	PI	15	FISH	PI	16	FISH	PI	17	FISH	PI	18	FISH
X	Y	Y	X	Y	Y	X	Y	Y	X	Y	Y	X	Y	Y	X	Y	Y	X	Y	Y	X	Y	Y	X	Y	Y	X	Y	Y	X	Y	Y	X	Y	Y	X	Y	Y	X	Y	Y	X	Y	Y	X	Y	Y	X	Y
0	9	172	0	16	200	0	34	163	0	32	166	0	26	159	0	27	143	0	46	141	0	17	169	0	16	170	0	19	149	0	19	166	0	20	133	0	15	161	0	16	168	0	17	130	0	27	192	0	19
1	8.106	181.486	1	14.579	203.755	1	34.987	178.507	1	32	184.458	1	21.24	166.257	1	24.096	151.826	1	35.12	148.524	1	14.762	181.999	1	19.13	170.164	1	17.329	162.448	1	17.505	176.374	1	17.555	139.911	1	12.835	174.509	1	15	173	1	8.943	136.383	1	22.636	221.51	1	13.635
2	6.422	185.094	2	11.848	213.08	2	29.302	191.127	2	33.036	198.989	2	19.351	169.389	2	22.63	156.628	2	27.307	149.051	2	15.52	191.909	2	17.778	175.461	2	15.533	174.798	2	15.848	185.626	2	17.545	149.767	2	13.946	182.844	2	15	171	2	6.742	145.406	2	21.96	232.365	2	11.044
3	4.058	184.616	3	8.664	219.519	3	24.241	200.356	3	34.996	206.502	3	14.908	172.443	3	25.849	164.173	3	21.359	143.68	3	19.779	193.355	3	18.492	184.533	3	15.063	178.312	3	13.765	189.505	3	17.107	152.909	3	14.609	181.882	3	17	168	3	7.509	154.514	3	23.489	228.392	3	9.505
4	2.089	178.525	4	3.372	224.028	4	25.649	199.133	4	34.337	211.317	4	14.319	174.005	4	30.198	166.74	4	19.205	139.511	4	21.366	190.267	4	22.767	198.334	4	15.015	182.342	4	14.325	189.986	4	16.144	155.972	4	15.906	185.971	4	24	168	4	11.206	155.433	4	25.446	227.389	4	9.944
5	1.111	182.541	5	1.834	222.137	5	24.624	196.573	5	33.328	215.681	5	17.053	178.248	5	33.88	162.565	5	19	137.391	5	20.812	184.703	5	33.469	208.154	5	15.885	186.453	5	14.847	191.804	5	15.895	164.446	5	24.003	193.245	5	32	169	5	16.478	150.803	5	24.052	226.566	5	15.143
6	1.915	188.731	6	3.192	223.344	6	27.235	198.74	6	29.748	216.511	6	22.042	174.989	6	39.224	152.499	6	18.001	134.071	6	25.105	183.27	6	42.98	208.869	6	18.679	188.558	6	13.032	200.799	6	14.165	168.623	6	32.557	197.242	6	39	171	6	21.038	148.315	6	20.888	209.813	6	21.608
7	3.765	187.142	7	8.244	228.552	7	32.88	197.878	7	24.343	217.29	7	28.042	163.525	7	54.055	146.569	7	16.358	134.22	7	27.64	180.881	7	45.994	203.085	7	28.514	186.331	7	10.467	202.979	7	16.084	169.345	7	39.2	190.766	7	60	158	7	23.053	145.475	7	16.734	201.958	7	29.457
8	11.263	191.331	8	15.749	232.039	8	44.994	189.156	8	20.592	218.483	8	38.793	153.814	8	73.382	141.691	8	13.224	132.51	8	32.508	176.158	8	44.643	188.975	8	47.585	184.11	8	8.076	208.726	8	20.404	165.571	8	51.825	179.405	8	95	143	8	20.001	135.26	8	14.01	197.143	8	41.22
9	20.626	194.601	9	24.111	224.753	9	59.701	184.703	9	21.181	218.501	9	53.817	150.474	9	93.342	139.906	9	16.521	134.624	9	30.497	168.207	9	44.919	169.531	9	81.228	175.277	9	6.047	209.333	9	32.889	165.91	9	71.23	164.275	9	133	132	9	20.2	117.216	9	14.119	194.626	9	59.069
10	32.695	187.446	10	33.319	209.556	10	74.044	181.869	10	22.491	210.296	10	64.347	146.338	10	107.018	137.186	10	21.857	129.16	10	29.178	160.502	10	41.354	162.813	10	122.962	167.207	10	6.136	199.194	10	55.429	171.56	10	85.742	145.744	10	147	123	10	25.082	99.7928	10	20.02	191.149	10	84.064
11	41.535	180.02	11	53.427	195.15	11	74.005	182.603	11	22.121	201.182	11	73.576	139.257	11	100.33	133.109	11	25.3	122.333	11	30.851	151.399	11	33.316	160.539	11	149.126	157.814	11	9.631	189.5	11	83.075	162.671	11	97.778	132.368	11	138	118	11	36.226	87.4025	11	35.439	180.094	11	107.389
12	46.825	173.343	12	94.583	176.537	12	77.762	173.806	12	21.789	183.812	12	87.774	133.716	12	101.993	127.067	12	31.007	115.368	12	42.976	145.082	12	36.105	151.544	12	155.664	147.106	12	18.564	175.703	12	100.443	150.739	12	106.268	124.291	12	115	119	12	53.313	74.1044	12	55.49	160.435	12	121.051
13	58.102	171.572	13	138.355	159.492	13	79.745	163.736	13	21.114	162.564	13	98.667	128.67	13	107.032	117.454	13	37.31	108.809	13	54.87	139.451	13	47.733	143.278	13	141.118	138.525	13	27.74	163.347	13	105.979	138.592	13	104.367	121.69	13	91	119	13	80.376	68.6082	13	64.838	140.435	13	130.041
14	75.254	162.028	14	162.755	147.018	14	79.606	159.355	14	22.963	144.955	14	97.269	119.808	14	108.635	109.698	14	48.401	105.295	14	71.348	131.279	14	70.195	138.004	14	127.568	129.527	14	38.163	143.771	14	102.841	125.266	14	101.814	119.197	14	79	118	14	94.701	66.1246	14	66.048	129.913	14	129.548
15	100.562	155.398	15	169.308	146.081	15	78.716	150.461	15	32.524	133.066	15	98.058	107.883	15	109.879	111.642	15	60.787	98.7598	15	72.703	127.124	15	98.28	132.255	15	123.147	119.961	15	51.895	127.217	15	100.388	112.078	15	93.361	113.825	15	80	117	15	104.516	64.5589	15	70.127	121.772	15	127.435
16	158.849	146.776	16	152.323	151.138	16	74.916	141.976	16	43.193	124.297	16	105.949	100.047	16	109.979	114.02	16	79.483	93.9265	16	73.973	121.999	16	121.827	126.629	16	126.788	107.6	16	69.68	116.851	16	119.135	97.0131	16	108.969	111.146	16	95	118	16	98.969	63.3141	16	73.252	117.126	16	123.743
17	190.957	131.557	17	128.47	148.93	17	85.97	131.749	17	63.002	108.976	17	110.961	92.458	17	116.09	116.382	17	94.557	87.5749	17	84.003	116.761	17	131.821	126.411	17	129.228	100.99	17	98.067	112.736	17	136.862	90.7701	17	128.137	108.996	17	105.372	112.221	17	89.938	63.8524	17	93.325	118.348	17	116.404
18	176.519	116.594	18	125.092	145.897	18	102.669	121.547	18	86.1	98.33	18	108.366	89.742	18	114.389	121.774	18	109.791	84.1783	18	91.502	116.035	18	133.958	127.905	18	123.944	96.739	18	129.488	110.473	18	147.405	89.1413	18	144.316	104.41	18	112.012	110.475	18	92.876	64.5609	18	110.532	122.407	18	105.669
19	158.893	104.005	19	127.676	139.1	19	128.784	112.59	19	113.237	94.787	19	100.559	94.983	19	112.947	119.037	19	125.737	83.3919	19	96.032	115.916	19	120.612	127.5	19	117.705	97.794	19	152.421	113.094	19	146.141	87.2416	19	143.388	103.459	19	112.63	109.778	19	102.275	64.2286	19	124.925	128.085	19	105.771
20	157.03	98.04	20	130.907	127.35	20	144.787	109.763	20	144.361	95.951	20	83.799	94.351	20	112.003	114.828	20	138.861	85.9755	20	90.223	113.181	20	109.591	127.796	20	121.861	96.98	20	152.627	112.566	20	141.952	85.2218	20	115.828	102.462	20	113.493	111.377	20	119.586	63.2459	20	141.384	126.487	20	112.842
21	158.11	95.667	21	128.226	121.879	21	149.733	107.162	21	159.191	99.936	21	72.313	92.724	21	118.7	115.785	21	144.221	88.9907	21	81.784	114.087	21	110.771	122.887	21	124.048	93.372	21	142.552	107.466	21	143.861	83.9219	21	86.13	100.412	21	114.248	114.182	21	134.608	63.1608	21	143.287	124.908	21	107.644
22	147.626	95	22	109.827	120.572	22	124.184	105.345	22	154.856	104.874	22	70.893	98.071	22	124.153	118.445	22	141.416	95.4881	22	61.736	116.015	22	123.784	120.533	22	124.959	91.516	22	135.563	105.486	22	152.493	87.4964	22	69.39	98.015	22	116.606	117.331	22	126.055	61.8536	22	129.267	125.092	22	89.783
23	116.074	97.335	23	78.758	120.542	23	102.141	109.642	23	176.714	109.222	23	66.434	102.381	23	127.511	119.322	23	141.491	97.0458	23	46.782	113.753	23	136.597	117.676	23	129.629	90.177	23	137.811	108.034	23	168.343	92.163	23	63.011	98.794	23	130.478	119.386	23	104.755	61.8331	23	104.586	127.838	23	70.563
24	79.568	101.256	24	56.587	122.325	24	109.836	115.546	24	181.459	110.657	24	66.032	103.692	24	128.351	117.727	24	141.34	92.6084	24	40.007	112.167	24	149.081	115.451	24	134.066	91.807	24	154.968	109.595	24	174.142	97.2615	24	60.775	101.327	24	146.052	124.561	24	91.867	64.0008	24	84.697	135.562	24	61.129
25	59.918	101.476	25	46.688	122.769	25	139.582	119.098	25	159.938	110.617	25	64.735	104.621	25	119.959	115.357	25	134.904	89.8571	25	35.694	111.173	25	151.761	116.455	25	143.882	92.624	25	193.845	112.377	25	176.143	99.7786	25	64.411	97.175	25	138.566	129.346	25	95.258	65.3943	25	78.581	131.955	25	61.099
26	59.193	98.391	26	52.409	122.575	26	158.547	113.279	26	130.521	109.96	26	46.842	104.378	26	113.756	114.37	26	129.613	89.5606	26	38.701	111.823	26	129.341	117.261	26	146.29	92.163	26	219.892	114.868	26	158.401	99.0817	26	78.247	94.649	26	111.7	128.109	26	133.571	65.1999	26	89.787	126.134	26	65.357
27	70.452	94.284	27	62.74	123.555	27	158.235	106.476	27	101.797	109.505	27	34.247	97.381	27	115.924	112.323	27	118.636	90.0828	27	48.396	113.44	27	108.122	115.23	27	153.689	91.686	27	197.589	118.117	27	131.689	100.451	27	82.604	94.107	27	85.1371	124.965	27	172.152	66.3696	27	108.337	130.165	27	75.234
28	82.34	90.715	28	63.226	124.11	28	140.308	104.047	28	94.182	106.7	28	33.359	95.019	28	115.791	111.478	28	114.744	94.4567	28	60.747	112.372	28	97.728	118.316	28	182.895	93.075	28	155.628	116.369	28	101.943	98.6961	28	77.85	94.785	28	68.9516	124.716	28	185.742	68.0808	28	127.432	126.721	28	93.889
29	85.333	90.453	29	64.883	121.194	29	107.769	105.181	29	107.235	108.285	29	39.495	88.981	29	101.673	111.689	29	118.543	100.973	29	74.278	112.5	29	105.86	119.553	29	214.776	98.826	29	120.035	110.637	29	75.008	94.7624	29	75.333	97.351	29	72.6217	125.035	29	182.091	70.5044	29	138.394	128.249	29	114.679
30	79.427	93.896	30	93.059	114.004	30	76.661	108.905	30	128.241	108.221	30	45.432	85.861	30	84.001	112.108	30	112.484	104.966	30	90.131	117.578	30	117.63	118.032	30	228.401	103.202	30	104.331	109.222	30	67.572	95.5582	30	80.66	97.217	30	80.1436	126.282	30	170.774	74.1597	30	144.342	129.415	30	130.923
31	69.565	98.207	31	128.201	103.384	31	47.824	109.201	31	152.688	107.902	31	45.461	89.032	31	70.48	114.892	31	102.418	104.949	31	94.994	122.861	31	115.897	114.362	31	215.556	102.86	31	102.179	105.597	31	70.727	94.8137	31	90.751	100.128	31	86.0138	122.955	31	152.101	77.0574	31	132.756	123.992	31	155.476
32	62.296	98.905	32	137.892	100.283	32	36.426	101.162	32	169.928	108.218	32	44.426	91.583	32	67.649	118.657	32	85.367	102.925	32	90.294	120.802	32	109.683	107.604	32	185.193	102.241	32	108.325	102.499	32	76.08	93.4778	32	91.646	102.07	32	90.094	121.018	32	141.888	78.9683	32	122.281	118.365	32	177.799
33	61.657	94.446	33	138.887	105.141	33	46.275	94.479	33	167.935	109.26	33	57.69	93.346	33	65.77	116.844	33	75.69	99.3391	33	85.84	119.606	33	106.073	104.844	33	141.776	100.231	33	119.344	103.733	33	78.476	94.3645	33	84.838	105.205	33	84.271	118.513	33	142.292	81.3979	33	126.086	114.507	33	185.496
34	70.251	85.311	34	124.118	113.76	34	65.906	99.127	34	153.739	113.657	34	76.688	95.708	34	63.876	114.444	34	83.622	97.5845	34	90.292	119.965	34	116.207	105.948	34	121.042	97.604	34	134.726	104.412	34	80.656	92.3059	34	79.923	105.223	34	74.6262	111.295	34	140.792	84.357	34	120.519	113.977	34	187.584
35	82.685	77.702	35	102.007	115.503	35	87.527	106.897	35	129.882	117.047	35	91.56	95.396	35	66.205	114.076	35	103.477	101.978	35	100.816	118.636	35	125.232	111.645	35	128.213	95.259	35	155.654	106.533	35	76.51	90.9205	35	82.186	104.245	35	76.1749	105.546	35	143.188	81.7407	35	126.668	111.633	35	193.103
36	95.7	77.719	36	92.207	120.223	36	96.755	109.311	36	111.401	116.31	36	92.735	96.788	36	69.73	112.318	36	132.714	108.914	36	105.888	110.719	36	123.602	118.688	36	151.148	95.227	36	169.726	107.176	36	76.987	91.906	36	91.453	102.541	36	87.1709	102.789	36	162.329	82.6738	36	142.715	112.116	36	184.909
37	107.337	82.31	37	82.454	127.056	37	109.927	107.117	37	102.43	111.694	37	77.954	100.253	37	72.251	112.461	37	161.659	111.478	37	108.449	101.247	37	121.015	122.331	37	184.244	97.215	37	168.212	106.767	37	83.34	95.448	37	103.188	101.051	37	109.621	100.765	37	153.926	84.2725	37	140.063	116.678	37	159.821
38	109.178	83.594	38	77.463	118.322	38	125.946	105.819	38	99.345	108.353	38	56.602	102.532	38	84.072	116.13	38	195.712	113.059	38	101.687	97.9981	38	128.719	124.189	38	204.371	98.234	38	162.238	107.826	38	90.705	99.1635	38	105.878	99.077	38	132.502	100.808	38	129.018	83.6014	38	120.097	119.945	38	137.036
39	94.641	84.34	39	86.011	108.803	39	142.103	106.152	39	95.218	109.42	39	43.416	103.353	39	98.342	123.198	39	226.201	111.703	39	86.222	98.9118	39	142.406	123.594	39	197.224	96.829	39	151.421	109.672	39	95.876	99.7129	39	93.441	96.276	39	148.336	100.221	39	114.819	81.2595	39	111.253	117.752	39	107.114
40	76.902	84.822	40	100.108	104.88	40	156.244	102.687	40	90.142	108.395	40	39.813	103.016	40	104.034	128.435	40	252.913	112.285	40	78.441	105.865	40	157.986	122.302	40	179.124	97.827	40	138.361	107.507	40	90	103	40	80.975	94.594	40	161.38	103.178	40	106.466	79.2813	40	128.949	117.2	40	94.299
41	53.733	86.039	41	117.676	108.917	41	161.521	94.341	41	90.271	108.105	41	40.936	104.388	41	107.1	134.441	41	253.001	114.984	41	81.378	112.771	41	172.815	120.511	41	167.117	102.435	41	133.994	103.394	41	83.701	102.475	41	78.458	92.054	41	155.064	102.053	41	99.981	79.2525	41	150.571	114.18	41	102.932
42	36.857	92.204	42	120.616	118.949	42	149.042	92.923	42	91.963	105.863	42	52.349	103.552	42	98.572	135.319	42	215.685	121.537	42	98.362	116.257	42	181.92	122.608	42	147.42	109.521	42	126.844	101.703	42	72.258	101.928	42	89.797	90.639	42	140.786	98.983	42	111.792	82.0651	42	168.361	111.607	42	118.293
43	38.241	96.423	43	104.637	127.32	43	136.553	94.386	43	95.375	103.471	43	75.153	97.904	43	78.836	130.931	43	168.361	126.966	43	111.788	117.512	43	172.637	126.101	43	129.448	109.613	43	124.242	100.068	43	71.616	104.448	43	106.407	91.717	43	119.022	97.7042	43	144	81.8716	43	159.474	106.877	43	135.739
44	51.572	96.776	44	91.771	131.119	44	108.996	96.86	44	103.732	104.17	44	102.61	92.861	44	76.661	127.383	44	134.03	126.73	44	119.759	118.552	44	160.28	131.043	44	122.408	104.299	44	120.824	101.429	44	75.945	108.958	44	113.894	93.327	44	94.5296	96.4623	44	182.774	82.9713	44	132.697	104.059	44	147.588
45	63.884	96.11	45	89.744	127.614	45	88.1	101.811	45	114.893	104.74	45	118.838	88.822	45	102.39	123.749	45	121.924	120.566	45	103.19	112.457	45	150.59	134.363	45	132.06	100.684	45	126.598	100.583	45	84.789	110.466	45	109.725	95.908	45	64.5821	89.5474	45	217.89	84.25	45	102.313	97.235	45	142.856
46	89.681	93.745	46	95.892	121.707	46	76.657	105.915	46	137.056	105.458	46	105.461	82.775	46	129.16	114.521	46	119.76	110.508	46	89.054	109.145	46	150.901	128.462	46	156.372	98.638	46	138.952	100.184	46	96.406	108.036	46	98.109	101.318				46	208.614	83.3831	46	105.796	92.375	46	135.864
47	114.975	88.561	47	101.055	113.651	47	68.571	113.992	47	165.042	106.549	47	78.172	80.67	47	136.112	107.234	47	137.69	103.454	47	78.523	107.077	47	153.086	121.665	47	165.021	97.39	47	140.795	97.568	47	102.902	107.137	47	81.053	106.342				47	176.202	83.4074	47	103.374	93.763	47	130.57
48	133.924	84.624	48	116.26	105.867	48	71.547	111.424	48	178.243	109.061	48	57.595	81.193	48	125.769	105.496	48	166.124	100.023	48	68.67	105.219	48	147.319	116.849	48	149.953	98.946	48	128.401	94.845	48	106.077	106.664							48	144.802	85.126	48	105.52	96.476	48	123.324
49	143.036	83.564	49	120.184	105.712	49	77.943	108.089	49	184.87	109.048	49	55.374	80.006	49	110.593	104.977	49	179.887	101.986	49	58.946	107.651	49	138.1	114.437	49	126.17	101.258	49	110.268	94.366	49	98.752	100.976							49	122.334	83.1377	49	116.866	96.687	49	116.46
50	148.758	85.946	50	105.246	107.013	50	80.885	105.716	50	190.439	106.527	50	50.399	82.719	50	96.848	106.022	50	175.423	106.964	50	55.391	106.62	50	122.405	108.446	50	98.716	100.089	50	90.316	95.161	50	83.607	100.086							50	113.142	79.5193	50	139.834	92.391	50	104.387
51	147.722	87.892	51	83.623	108.878	51	79.508	103.363	51	182.961	106.43	51	40.699	85.998	51	84.654	105.398	51	145.358	110.836	51	57.863	111.534	51	110.193	104.968	51	79.894	93.97	51	79.623	95.61										51	130.163	75.8439	51	151.374	89.351	51	93.273
52	168.471	89.949	52	67.361	111.629	52	75.003	103.635	52	151.47	106.49	52	28.556	82.875	52	86.756	99.7061	52	117.278	111.756	52	73.206	115.916	52	105.347	102.365	52	72.07	84.029	52	76.227	97.405										52	136.113	69.5023	52	156.82	88.339	52	87.345
53	140.225	89.671	53	65.608	113.968	53	78.707	102.589	53	118.673	104	53	25.111	82.33	53	86.175	101.927	53	98.18	114.185	53	86.408	115.403	53	107.172	102.782	53	67.513	72.792	53	73.589	98.377													53	141.212	86.824	53	86.195
54	106.655	90.515	54	70.959	113.967	54	82.842	96.712	54	104.684	101.813	54	26.625	82.144	54	91.518	100.956	54	102.172	116.323	54	87.84	113.673	54	132.151	101.588				54	77.345	96.648													54	106.882	88.628
55	83.953	89.537	55	74.315	114.522	55	80.441	90.028	55	107.648	103.511	55	33.545	83.929	55	95.236	98.7111	55	128.688	126.848	55	84.616	118.144	55	164.941	102.446				55	75.361	92.395													55	87.754	91.156
56	66.652	92.69	56	69.282	109.466	56	71.016	91.637	56	124.687	106.618	56	42.635	84.642	56	106.842	96.3442	56	166.324	135.725	56	73.475	119.211	56	183.419	111.615				56	68.793	88.337													56	74.318	86.97
57	69.348	94.935	57	78.347	105.562	57	49.856	90.049	57	150.067	110.567	57	52.702	83.897	57	124.441	97.2673	57	189.454	137.915	57	57.99	111.214	57	181.556	118.031				57	72.505	88.273													57	62.276	84.793
58	79.277	92.449	58	103.605	107.943	58	49.699	89.061	58	178.054	114.385	58	59.993	82.421				58	205.912	140				58	150.358	122.436				58	78.401	90.13													58	58.647	82.094
59	93.133	89.628	59	133.027	113.114	59	61.849	89.821	59	189.163	110.915	59	57.688	78.4				59	184.187	133.06				59	116.387	122.896				59	83.748	93.719													59	62.99	79.733
60	89.659	92.148	60	152.624	119.128	60	79.272	89.679				60	51.544	75.795										60	92.065	117.326				60	80.727	97.687
61	74.631	94.186	61	158.452	120.825	61	98.684	88.219				61	45.251	71.349																61	69.113	97.036
62	55.394	97.714	62	153.095	124.346	62	110.284	86.85																						62	55.245	88.203
63	47.502	98.024	63	134.559	123.979	63	112.813	88.054
			64	113.138	121.113	64	101.445	90.396
			65	104.072	117.476	65	95.029	91.388
			66	103.971	113.806	66	110.551	93.256
			67	99.642	108.639	67	127.798	95.819
			68	82.039	107.085	68	126.541	97.825
			69	60.389	108.099	69	116.635	98.359
			70	45.43	110.731	70	105.264	98.07
			71	42.172	110.258
			72	49.213	107.03
			73	56.369	103.828
			74	55.573	102.029
			75	49.981	104.42
			76	53.303	111.135
			77	67.145	116.451
			78	83.537	116.422
			79	95.084	112.485
			80	90.307	107.28
[truncated: 64 more columns]

## Sheet: Binned Values
% Chr Length		2	FISH	PI	3	FISH	PI	40	FISH	PI	25	FISH	PI	28	FISH	PI	1	FISH	PI	12	FISH	PI	35	FISH	PI	36	FISH	PI	34	FISH	PI	5	FISH	PI	10	FISH	PI	4	FISH	PI	7	FISH	PI	17	FISH	PI	33	FISH	PI
		X	Y	Y	X	Y	Y	X	Y	Y	X	Y	Y	X	Y	Y	X	Y	Y	X	Y	Y	X	Y	Y	X	Y	Y	X	Y	Y	X	Y	Y	X	Y	Y	X	Y	Y	X	Y	Y	X	Y	Y	X	Y	Y
0-5		0	16	200	0	34	163	0	26	164	0	24	152	0	30	161	0	9	172	0	19	166	0	9	166	0	12	166	0	26	164	0	26	159	0	16	170	0	32	166	0	46	141	0	27	192	0	23	129
		1.25	14.579	203.755	1.42857	34.987	178.507	1.47059	31.551	161.419	1.49254	24.615	159.805	1.53846	23.147	167.784	1.5873	8.106	181.486	1.6129	17.505	176.374	1.6129	8	164	1.63934	11.742	165.046	1.63934	26.286	177.469	1.63934	21.24	166.257	1.66667	19.13	170.164	1.69492	32	184.458	1.69492	35.12	148.524	1.69492	22.636	221.51	1.72414	20.682	149.426
		2.5	11.848	213.08	2.85714	29.302	191.127	2.94118	35.397	167.688	2.98507	20.938	163.272	3.07692	26.65	170.19	3.1746	6.422	185.094	3.22581	15.848	185.626	3.22581	11	160	3.27869	11.946	161.364	3.27869	31.057	190.479	3.27869	19.351	169.389	3.33333	17.778	175.461	3.38983	33.036	198.989	3.38983	27.307	149.051	3.38983	21.96	232.365	3.44828	21.391	164.569
		3.75	8.664	219.519	4.28571	24.241	200.356	4.41176	32.672	177.557	4.47761	19.46	165.317	4.61538	26.401	163.642	4.7619	4.058	184.616	4.83871	13.765	189.505	4.83871	19	157	4.91803	13.636	156.32	4.91803	34.152	199.825	4.91803	14.908	172.443	5	18.492	184.533
		5	3.372	224.028
			10.8926	212.076		30.6325	183.248		31.405	167.666		22.2533	160.099		26.5495	165.654		6.8965	180.799		16.5295	179.376		11.75	161.75		12.331	162.182		29.3738	182.943		20.3747	166.772		17.85	175.04		32.3453	183.149		36.1423	146.192		23.8653	215.292		21.691	147.665
5-10		6.25	1.834	222.137	5.71429	25.649	199.133	5.88235	30.486	182.749	5.97015	17.406	170.15	6.15385	21.379	164.459	6.34921	2.089	178.525	6.45161	14.325	189.986	6.45161	26	152	6.55738	16.454	161.452	6.55738	34.355	198.945	6.55738	14.319	174.005	6.66667	22.767	198.334	5.08475	34.996	206.502	5.08475	21.359	143.68	5.08475	23.489	228.392	5.17241	21.424	174.315
		7.5	3.192	223.344	7.14286	24.624	196.573	7.35294	32.562	178.854	7.46269	14.989	176.629	7.69231	19.027	167.635	7.93651	1.111	182.541	8.06452	14.847	191.804	8.06452	32	150	8.19672	19.291	162.884	8.19672	33.808	199.344	8.19672	17.053	178.248	8.33333	33.469	208.154	6.77966	34.337	211.317	6.77966	19.205	139.511	6.77966	25.446	227.389	6.89655	20.969	180.241
		8.75	8.244	228.552	8.57143	27.235	198.74	8.82353	32.218	174.036	8.95522	15.827	174.433	9.23077	19.003	172.534	9.52381	1.915	188.731	9.67742	13.032	200.799	9.67742	42	140	9.83607	25.635	160.093	9.83607	31.572	194.965	9.83607	22.042	174.989	10	42.98	208.869	8.47458	33.328	215.681	8.47458	19	137.391	8.47458	24.052	226.566	8.62069	22.97	172.695
		10	15.749	232.039	10	32.88	197.878
			7.25475	226.518		27.597	198.081		31.7553	178.546		16.074	173.737		19.803	168.209		1.705	183.266		14.068	194.196		33.3333	147.333		20.46	161.476		33.245	197.751		17.8047	175.747		33.072	205.119		34.2203	211.167		19.8547	140.194		24.329	227.449		21.7877	175.75
10-15		11.25	24.111	224.753	11.4286	44.994	189.156	10.2941	32.145	173.574	10.4478	16.669	175.663	10.7692	22.48	177.196	11.1111	3.765	187.142	11.2903	10.467	202.979	11.2903	56	138	11.4754	36.817	150.286	11.4754	34.79	183.602	11.4754	28.042	163.525	11.6667	45.994	203.085	10.1695	29.748	216.511	10.1695	18.001	134.071	10.1695	20.888	209.813	10.3448	23.581	172.061
		12.5	33.319	209.556	12.8571	59.701	184.703	11.7647	29.104	167.856	11.9403	17.439	174.087	12.3077	22.071	177.455	12.6984	11.263	191.331	12.9032	8.076	208.726	12.9032	70.635	139.865	13.1148	51.405	143.106	13.1148	41.156	169.482	13.1148	38.793	153.814	13.3333	44.643	188.975	11.8644	24.343	217.29	11.8644	16.358	134.22	11.8644	16.734	201.958	12.069	19.376	176.841
		13.75	53.427	195.15	14.2857	74.044	181.869	13.2353	23.269	159.435	13.4328	15.363	170.762	13.8462	23.964	172.108	14.2857	20.626	194.601	14.5161	6.047	209.333	14.5161	88.226	132.868	14.7541	68.068	134.977	14.7541	57.392	153.21	14.7541	53.817	150.474	15	44.919	169.531	13.5593	20.592	218.483	13.5593	13.224	132.51	13.5593	14.01	197.143	13.7931	15.812	176.797
		15	94.583	176.537				14.7059	20.822	159.244	14.9254	11.639	164.684
			51.36	201.499		59.5797	185.243		26.335	165.027		15.2775	171.299		22.8383	175.586		11.8847	191.025		8.19667	207.013		71.6203	136.911		52.0967	142.79		44.446	168.765		40.2173	155.938		45.1853	187.197		24.8943	217.428		15.861	133.6		17.2107	202.971		19.5897	175.233
15-20		16.25	138.355	159.492	15.7143	74.005	182.603	16.1765	27.718	162.949	16.4179	9.096	144.814	15.3846	30.526	175.584	15.873	32.695	187.446	16.129	6.136	199.194	16.129	106.702	122.144	16.3934	78.93	125.43	16.3934	83.83	132.899	16.3934	64.347	146.338	16.6667	41.354	162.813	15.2542	21.181	218.501	15.2542	16.521	134.624	15.2542	14.119	194.626	15.5172	18.612	183.637
		17.5	162.755	147.018	17.1429	77.762	173.806	17.6471	38.762	159.068	17.9104	10.319	127.69	16.9231	42.192	180.205	17.4603	41.535	180.02	17.7419	9.631	189.5	17.7419	114.738	106.502	18.0328	75.148	115.865	18.0328	114.51	115.318	18.0328	73.576	139.257	18.3333	33.316	160.539	16.9492	22.491	210.296	16.9492	21.857	129.16	16.9492	20.02	191.149	17.2414	20.475	188.383
		18.75	169.308	146.081	18.5714	79.745	163.736	19.1176	46.701	146.132	19.403	16.889	117.131	18.4615	51.554	179.812	19.0476	46.825	173.343	19.3548	18.564	175.703	19.3548	106.116	101.068	19.6721	66.579	107.344	19.6721	134.953	101.639	19.6721	87.774	133.716	20	36.105	151.544	18.6441	22.121	201.182	18.6441	25.3	122.333	18.6441	35.439	180.094	18.9655	19.651	183.388
		20	152.323	151.138	20	79.606	159.355							20	60.92	172.428
			155.685	150.932		77.7795	169.875		37.727	156.05		12.1013	129.878		46.298	177.007		40.3517	180.27		11.4437	188.132		109.185	109.905		73.5523	116.213		111.098	116.619		75.2323	139.77		36.925	158.299		21.931	209.993		21.226	128.706		23.1927	188.623		19.5793	185.136
20-25		21.25	128.47	148.93	21.4286	78.716	150.461	20.5882	56.597	135.183	20.8955	32.554	106.862	21.5385	74.354	158.319	20.6349	58.102	171.572	20.9677	27.74	163.347	20.9677	104.558	98.5935	21.3115	66.405	98.9586	21.3115	134.947	89.517	21.3115	98.667	128.67	21.6667	47.733	143.278	20.339	21.789	183.812	20.339	31.007	115.368	20.339	55.49	160.435	20.6897	22.59	172.471
		22.5	125.092	145.897	22.8571	74.916	141.976	22.0588	66.81	126.151	22.3881	55.296	97.298	23.0769	88.518	136.731	22.2222	75.254	162.028	22.5806	38.163	143.771	22.5806	116.26	101.549	22.9508	76.876	92.5203	22.9508	124.152	80.187	22.9508	97.269	119.808	23.3333	70.195	138.004	22.0339	21.114	162.564	22.0339	37.31	108.809	22.0339	64.838	140.435	22.4138	32.093	158.331
		23.75	127.676	139.1	24.2857	85.97	131.749	23.5294	81.833	112.75	23.8806	68.989	91.515	24.6154	97.09	119.442	23.8095	100.562	155.398	24.1935	51.895	127.217	24.1935	118.869	102.901	24.5902	92.457	85.9916	24.5902	115.047	79.318	24.5902	98.058	107.883	25	98.28	132.255	23.7288	22.963	144.955	23.7288	48.401	105.295	23.7288	66.048	129.913	24.1379	47.013	146.728
		25	130.907	127.35				25	88.127	109.797
			128.036	140.319		79.8673	141.395		73.3418	120.97		52.2797	98.5583		86.654	138.164		77.9727	162.999		39.266	144.778		113.229	101.014		78.5793	92.4902		124.715	83.0073		97.998	118.787		72.0693	137.846		21.9553	163.777		38.906	109.824		62.1253	143.594		33.8987	159.177
25-30		26.25	128.226	121.879	25.7143	102.669	121.547	26.4706	93.618	105.868	25.3731	84.305	89.212	26.1538	106.815	108.004	25.3968	158.849	146.776	25.8065	69.68	116.851	25.8065	130.388	101.469	26.2295	95.968	81.8926	26.2295	119.264	78.472	26.2295	105.949	100.047	26.6667	121.827	126.629	25.4237	32.524	133.066	25.4237	60.787	98.7598	25.4237	70.127	121.772	25.8621	62.445	137.539
		27.5	109.827	120.572	27.1429	128.784	112.59	27.9412	87.42	101.735	26.8657	94.808	86.55	27.6923	112.269	102.221	26.9841	190.957	131.557	27.4194	98.067	112.736	27.4194	127.855	101.325	27.8689	85.618	81.2959	27.8689	128.909	74.277	27.8689	110.961	92.458	28.3333	131.821	126.411	27.1186	43.193	124.297	27.1186	79.483	93.9265	27.1186	73.252	117.126	27.5862	77.697	124.315
		28.75	78.758	120.542	28.5714	144.787	109.763	29.4118	80.811	98.074	28.3582	95.093	81.944	29.2308	112.093	101.909	28.5714	176.519	116.594	29.0323	129.488	110.473	29.0323	103.936	100.051	29.5082	73.776	78.9408	29.5082	131.207	73.441	29.5082	108.366	89.742	30	133.958	127.905	28.8136	63.002	108.976	28.8136	94.557	87.5749	28.8136	93.325	118.348	29.3103	95.678	110.546
		30	56.587	122.325	30	149.733	107.162				29.8507	97.375	79.702
			93.3495	121.33		131.493	112.766		87.283	101.892		92.8953	84.352		110.392	104.045		175.442	131.642		99.0783	113.353		120.726	100.948		85.1207	80.7098		126.46	75.3967		108.425	94.0823		129.202	126.982		46.2397	122.113		78.2757	93.4204		78.9013	119.082		78.6067	124.133
30-35		31.25	46.688	122.769	31.4286	124.184	105.345	30.8824	73.34	97.178	31.3433	104.925	79.008	30.7692	113.907	99.352	30.1587	158.893	104.005	30.6452	152.421	113.094	30.6452	72.633	97.6231	31.1475	67.72	79.4314	31.1475	120.765	74.121	31.1475	100.559	94.983	31.6667	120.612	127.5	30.5085	86.1	98.33	30.5085	109.791	84.1783	30.5085	110.532	122.407	31.0345	109.466	99.656
		32.5	52.409	122.575	32.8571	102.141	109.642	32.3529	68.66	94.531	32.8358	107.347	76.979	32.3077	118.677	97.245	31.746	157.03	98.04	32.2581	152.627	112.566	32.2581	54.743	93.8041	32.7869	64.43	84.2427	32.7869	109.24	76.677	32.7869	83.799	94.351	33.3333	109.591	127.796	32.2034	113.237	94.787	32.2034	125.737	83.3919	32.2034	124.925	128.085	32.7586	112.455	95.247
		33.75	62.74	123.555	34.2857	109.836	115.546	33.8235	69.848	88.903	34.3284	96.843	76.57	33.8462	122.795	96.729	33.3333	158.11	95.667	33.871	142.552	107.466	33.871	58.455	91.7329	34.4262	61.79	88.9557	34.4262	111.747	83.898	34.4262	72.313	92.724	35	110.771	122.887	33.8983	144.361	95.951	33.8983	138.861	85.9755	33.8983	141.384	126.487	34.4828	116.732	90.158
		35	63.226	124.11													34.9206	147.626	95
			56.2658	123.252		112.054	110.178		70.616	93.5373		103.038	77.519		118.46	97.7753		155.415	98.178		149.2	111.042		61.9437	94.3867		64.6467	84.2099		113.917	78.232		85.557	94.0193		113.658	126.061		114.566	96.356		124.796	84.5152		125.614	125.66		112.884	95.0203
35-40		36.25	64.883	121.194	35.7143	139.582	119.098	35.2941	67.719	85.032	35.8209	71.852	78.602	35.3846	119.949	99.709	36.5079	116.074	97.335	35.4839	135.563	105.486	35.4839	77.424	91.798	36.0656	56.01	91.2999	36.0656	115.182	92.922	36.0656	70.893	98.071	36.6667	123.784	120.533	35.5932	159.191	99.936	35.5932	144.221	88.9907	35.5932	143.287	124.908	36.2069	124.962	88.885
		37.5	93.059	114.004	37.1429	158.547	113.279	36.7647	64.53	84.794	37.3134	49.988	80.31	36.9231	115.179	101.528	38.0952	79.568	101.256	37.0968	137.811	108.034	37.0968	92.447	93.1717	37.7049	55.952	89.2719	37.7049	107.462	101.483	37.7049	66.434	102.381	38.3333	136.597	117.676	37.2881	154.856	104.874	37.2881	141.416	95.4881	37.2881	129.267	125.092	37.931	126.995	92.915
		38.75	128.201	103.384	38.5714	158.235	106.476	38.2353	67.327	87.615	38.806	40.12	79.646	38.4615	112.539	100.96	39.6825	59.918	101.476	38.7097	154.968	109.595	38.7097	94.521	93.3538	39.3443	54.745	88.5263	39.3443	99.348	105.682	39.3443	66.032	103.692	40	149.081	115.451	38.9831	176.714	109.222	38.9831	141.491	97.0458	38.9831	104.586	127.838	39.6552	113.868	98.672
		40	137.892	100.283	40	140.308	104.047	39.7059	76.169	90.289				40	112.461	102.06
			106.009	109.716		149.168	110.725		68.9363	86.9325		53.9867	79.5193		115.032	101.064		85.1867	100.022		142.781	107.705		88.1307	92.7745		55.569	89.6994		107.331	100.029		67.7863	101.381		136.487	117.887		163.587	104.677		142.376	93.8415		125.713	125.946		121.942	93.4907
40-45		41.25	138.887	105.141	41.4286	107.769	105.181	41.1765	91.532	90.276	40.2985	45.859	77.397	41.5385	118.293	101.291	41.2698	59.193	98.391	40.3226	193.845	112.377	40.3226	82.157	92.4792	40.9836	53.056	87.3241	40.9836	91.207	106.367	40.9836	64.735	104.621	41.6667	151.761	116.455	40.678	181.459	110.657	40.678	141.34	92.6084	40.678	84.697	135.562	41.3793	103.297	105.46
		42.5	124.118	113.76	42.8571	76.661	108.905	42.6471	104.328	87.893	41.791	59.749	75.976	43.0769	133.163	99.467	42.8571	70.452	94.284	41.9355	219.892	114.868	41.9355	65.731	91.8178	42.623	49.725	87.0159	42.623	90.4	109.216	42.623	46.842	104.378	43.3333	129.341	117.261	42.3729	159.938	110.617	42.3729	134.904	89.8571	42.3729	78.581	131.955	43.1034	114.032	106.37
		43.75	102.007	115.503	44.2857	47.824	109.201	44.1176	110.729	83.342	43.2836	76.463	82.639	44.6154	149.622	98.8	44.4444	82.34	90.715	43.5484	197.589	118.117	43.5484	46.712	93.5364	44.2623	48.911	88.4963	44.2623	103.04	107.602	44.2623	34.247	97.381	45	108.122	115.23	44.0678	130.521	109.96	44.0678	129.613	89.5606	44.0678	89.787	126.134	44.8276	122.95	103.524
		45	92.207	120.223							44.7761	85.864	88.316
			114.305	113.657		77.418	107.762		102.196	87.1703		66.9838	81.082		133.693	99.8527		70.6617	94.4633		203.775	115.121		64.8667	92.6111		50.564	87.6121		94.8823	107.728		48.608	102.127		129.741	116.315		157.306	110.411		135.286	90.6754		84.355	131.217		113.426	105.118
45-50		46.25	82.454	127.056	45.7143	36.426	101.162	45.5882	126.505	79.709	46.2687	82.716	91.729	46.1538	140.414	100.819	46.0317	85.333	90.453	45.1613	155.628	116.369	45.1613	33.75	96.047	45.9016	56.41	91.568	45.9016	117.735	97.581	45.9016	33.359	95.019	46.6667	97.728	118.316	45.7627	101.797	109.505	45.7627	118.636	90.0828	45.7627	108.337	130.165	46.5517	131.116	102.548
		47.5	77.463	118.322	47.1429	46.275	94.479	47.0588	135.264	77.604	47.7612	81.232	94.217	47.6923	119.014	103.476	47.619	79.427	93.896	46.7742	120.035	110.637	46.7742	29.02	96.9957	47.541	72.336	88.5699	47.541	130.28	87.735	47.541	39.495	88.981	48.3333	105.86	119.553	47.4576	94.182	106.7	47.4576	114.744	94.4567	47.4576	127.432	126.721	48.2759	148.41	103.626
		48.75	86.011	108.803	48.5714	65.906	99.127	48.5294	122.256	74.939	49.2537	80.825	94.815	49.2308	109.485	105.607	49.2063	69.565	98.207	48.3871	104.331	109.222	48.3871	27.374	100.095	49.1803	85.341	86.5101	49.1803	140.465	84.553	49.1803	45.432	85.861	50	117.63	118.032	49.1525	107.235	108.285	49.1525	118.543	100.973	49.1525	138.394	128.249	50	148.569	101.5
		50	100.108	104.88	50	87.527	106.897	50	100.14	72.446										50	102.179	105.597	50	30.31	100.493
			86.509	114.765		59.0335	100.416		121.041	76.1745		81.591	93.587		122.971	103.301		78.1083	94.1853		120.543	110.456		30.1135	98.4076		71.3623	88.8827		129.493	89.9563		39.4287	89.9537		107.073	118.634		101.071	108.163		117.308	95.1708		124.721	128.378		142.698	102.558
50-55		51.25	117.676	108.917	51.4286	96.755	109.311	51.4706	92.114	76.044	50.7463	79.367	96.897	50.7692	118.644	104.684	50.7937	62.296	98.905	51.6129	108.325	102.499	51.6129	41.979	99.1222	50.8197	84.309	83.3722	50.8197	147.949	83.91	50.8197	45.461	89.032	51.6667	115.897	114.362	50.8475	128.241	108.221	50.8475	112.484	104.966	50.8475	144.342	129.415	51.7241	133.328	97.715
		52.5	120.616	118.949	52.8571	109.927	107.117	52.9412	97.944	83.911	52.2388	76.697	95.938	52.3077	136.996	100.621	52.381	61.657	94.446	53.2258	119.344	103.733	53.2258	56.74	99.6491	52.459	75.051	82.4336	52.459	152.919	83.9	52.459	44.426	91.583	53.3333	109.683	107.604	52.5424	152.688	107.902	52.5424	102.418	104.949	52.5424	132.756	123.992	53.4483	107.336	97
		53.75	104.637	127.32	54.2857	125.946	105.819	54.4118	112.414	84.762	53.7313	70.388	92.765	53.8462	154.872	95.93	53.9683	70.251	85.311	54.8387	134.726	104.412	54.8387	71.642	99.856	54.0984	77.197	84.5663	54.0984	158.174	87.737	54.0984	57.69	93.346	55	106.073	104.844	54.2373	169.928	108.218	54.2373	85.367	102.925	54.2373	122.281	118.365	55.1724	78.364	96.756
		55	91.771	131.119
			108.675	121.576		110.876	107.416		100.824	81.5723		75.484	95.2		136.837	100.412		64.7347	92.8873		120.798	103.548		56.787	99.5424		78.8523	83.4574		153.014	85.1823		49.1923	91.3203		110.551	108.937		150.286	108.114		100.09	104.28		133.126	123.924		106.343	97.157
55-60		56.25	89.744	127.614	55.7143	142.103	106.152	55.8824	123.206	88.824	55.2239	57.708	90.95	55.3846	154.36	92.252	55.5556	82.685	77.702	56.4516	155.654	106.533	56.4516	80.695	100.121	55.7377	76.202	86.3021	55.7377	158.082	94.767	55.7377	76.688	95.708	56.6667	116.207	105.948	55.9322	167.935	109.26	55.9322	75.69	99.3391	55.9322	126.086	114.507	56.8966	61.376	97.961
		57.5	95.892	121.707	57.1429	156.244	102.687	57.3529	124.471	91.219	56.7164	49.067	90.347	56.9231	145.938	90.234	57.1429	95.7	77.719	58.0645	169.726	107.176	58.0645	83.751	100.506	57.377	68.603	87.3763	57.377	151.146	99.69	57.377	91.56	95.396	58.3333	125.232	111.645	57.6271	153.739	113.657	57.6271	83.622	97.5845	57.6271	120.519	113.977	58.6207	63.194	97.24
		58.75	101.055	113.651	58.5714	161.521	94.341	58.8235	131.818	90.815	58.209	49.668	89.746	58.4615	130.576	89.27	58.7302	107.337	82.31	59.6774	168.212	106.767	59.6774	85.993	97.9608	59.0164	70.923	86.9107	59.0164	140.95	100.341	59.0164	92.735	96.788	60	123.602	118.688	59.322	129.882	117.047	59.322	103.477	101.978	59.322	126.668	111.633	60.3448	75.965	98.762
		60	116.26	105.867	60	149.042	92.923							60	107.7	93.17
			100.738	117.21		152.227	99.0258		126.498	90.286		52.1477	90.3477		134.644	91.2315		95.2407	79.2437		164.531	106.825		83.4797	99.5295		71.9093	86.863		150.059	98.266		86.9943	95.964		121.68	112.094		150.519	113.321		87.5963	99.6338		124.424	113.372		66.845	97.9877
60-65		61.25	120.184	105.712	61.4286	136.553	94.386	60.2941	147.115	88.975	59.7015	60.87	91.516	61.5385	85.109	99.402	60.3175	109.178	83.594	61.2903	162.238	107.826	61.2903	83.099	97.8584	60.6557	82.061	87.9719	60.6557	124.732	97.333	60.6557	77.954	100.253	61.6667	121.015	122.331	61.0169	111.401	116.31	61.0169	132.714	108.914	61.0169	142.715	112.116	62.069	89.137	97.027
		62.5	105.246	107.013	62.8571	108.996	96.86	61.7647	160.829	90.868	61.194	73.614	91.937	63.0769	76.867	101.091	61.9048	94.641	84.34	62.9032	151.421	109.672	62.9032	78.522	94.9733	62.2951	82.75	86.7113	62.2951	112.128	92.382	62.2951	56.602	102.532	63.3333	128.719	124.189	62.7119	102.43	111.694	62.7119	161.659	111.478	62.7119	140.063	116.678	63.7931	107.538	98.742
		63.75	83.623	108.878	64.2857	88.1	101.811	63.2353	159.808	89.042	62.6866	81.216	94.95	64.6154	81.672	101.13	63.4921	76.902	84.822	64.5161	138.361	107.507	64.5161	77.76	90.8425	63.9344	78.402	86.1543	63.9344	107.602	87.784	63.9344	43.416	103.353	65	142.406	123.594	64.4068	99.345	108.353	64.4068	195.712	113.059	64.4068	120.097	119.945
		65	67.361	111.629				64.7059	159.81	90.413	64.1791	80.493	96.885
			94.1035	108.308		111.216	97.6857		156.891	89.8245		74.0482	93.822		81.216	100.541		93.5737	84.252		150.673	108.335		79.7937	94.5581		81.071	86.9458		114.821	92.4997		59.324	102.046		130.713	123.371		104.392	112.119		163.362	111.15		134.292	116.246		98.3375	97.8845
65-70		66.25	65.608	113.968	65.7143	76.657	105.915	66.1765	142.585	87.876	65.6716	66.286	99.418	66.1538	95.537	100.03	65.0794	53.733	86.039	66.129	133.994	103.394	66.129	79.348	93.0473	65.5738	78.551	86.5657	65.5738	111.824	86.384	65.5738	39.813	103.016	66.6667	157.986	122.302	66.1017	95.218	109.42	66.1017	226.201	111.703	66.1017	111.253	117.752	65.5172	109.094	97.065
		67.5	70.959	113.967	67.1429	68.571	113.992	67.6471	112.023	89.775	67.1642	53.158	97.276	67.6923	106.631	96.085	66.6667	36.857	92.204	67.7419	126.844	101.703	67.7419	74.917	98.2547	67.2131	85.294	87.3617	67.2131	118.166	87.176	67.2131	40.936	104.388	68.3333	172.815	120.511	67.7966	90.142	108.395	67.7966	252.913	112.285	67.7966	128.949	117.2	67.2414	115.2	98.067
		68.75	74.315	114.522	68.5714	71.547	111.424	69.1176	94.691	87.745	68.6567	47.115	97.92	69.2308	115.117	91.805	68.254	38.241	96.423	69.3548	124.242	100.068	69.3548	72.555	104.509	68.8525	102.421	87.3952	68.8525	125.379	89.726	68.8525	52.349	103.552	70	181.92	122.608	69.4915	90.271	108.105	69.4915	253.001	114.984	69.4915	150.571	114.18	68.9655	123.906	100.288
		70	69.282	109.466	70	77.943	108.089										69.8413	51.572	96.776
			70.041	112.981		73.6795	109.855		116.433	88.4653		55.5197	98.2047		105.762	95.9733		45.1008	92.8605		128.36	101.722		75.6067	98.6036		88.7553	87.1075		118.456	87.762		44.366	103.652		170.907	121.807		91.877	108.64		244.038	112.99		130.258	116.377		116.067	98.4733
70-75		71.25	78.347	105.562	71.4286	80.885	105.716	70.5882	83.276	88.165	70.1493	44.936	98.358	70.7692	118.074	90.104	71.4286	63.884	96.11	70.9677	120.824	101.429	70.9677	75.929	106.471	70.4918	114.135	88.1324	70.4918	142.684	92.256	70.4918	75.153	97.904	71.6667	172.637	126.101	71.1864	91.963	105.863	71.1864	215.685	121.537	71.1864	168.361	111.607	70.6897	118.835	99.571
		72.5	103.605	107.943	72.8571	79.508	103.363	72.0588	81.316	92.195	71.6418	46.835	98.69	72.3077	115.505	88.53	73.0159	89.681	93.745	72.5806	126.598	100.583	72.5806	94.799	101.931	72.1311	113.238	86.0789	72.1311	154.005	94.532	72.1311	102.61	92.861	73.3333	160.28	131.043	72.8814	95.375	103.471	72.8814	168.361	126.966	72.8814	159.474	106.877	72.4138	96.201	94.489
		73.75	133.027	113.114	74.2857	75.003	103.635	73.5294	86.813	94.814	73.1343	56.094	98	73.8462	119.443	86.148	74.6032	114.975	88.561	74.1935	138.952	100.184	74.1935	101.528	97.5317	73.7705	106.077	81.4466	73.7705	161.67	95.346	73.7705	118.838	88.822	75	150.59	134.363	74.5763	103.732	104.17	74.5763	134.03	126.73	74.5763	132.697	104.059	74.1379	74.522	91.709
		75	152.624	119.128				75	87.166	92.116	74.6269	67.895	98.786
			116.901	111.437		78.4653	104.238		84.6427	91.8225		53.94	98.4585		117.674	88.2607		89.5133	92.8053		128.791	100.732		90.752	101.978		111.15	85.2193		152.786	94.0447		98.867	93.1957		161.169	130.502		97.0233	104.501		172.692	125.078		153.511	107.514		96.5193	95.2563
75-80		76.25	158.452	120.825	75.7143	78.707	102.589	76.4706	85.187	85.531	76.1194	81.321	100.814	75.3846	120.645	86.061	76.1905	133.924	84.624	75.8065	140.795	97.568	75.8065	95.238	94.5955	75.4098	93.145	81.9941	75.4098	158.956	99.43	75.4098	105.461	82.775	76.6667	150.901	128.462	76.2712	114.893	104.74	76.2712	121.924	120.566	76.2712	102.313	97.235	75.8621	56.991	91.882
		77.5	153.095	124.346	77.1429	82.842	96.712	77.9412	83.796	84.481	77.6119	93.823	95.178	76.9231	129.954	86.075	77.7778	143.036	83.564	77.4194	128.401	94.845	77.4194	82.947	92.7067	77.0492	86.076	83.2091	77.0492	149.938	100.457	77.0492	78.172	80.67	78.3333	153.086	121.665	77.9661	137.056	105.458	77.9661	119.76	110.508	77.9661	105.796	92.375	77.5862	47.035	89.582
		78.75	134.559	123.979	78.5714	80.441	90.028	79.4118	88.353	82.679	79.1045	97.851	91.045	78.4615	136.731	86.29	79.3651	148.758	85.946	79.0323	110.268	94.366	79.0323	67	88.5082	78.6885	86.173	83.3648	78.6885	138.035	96.483	78.6885	57.595	81.193	80	147.319	116.849	79.661	165.042	106.549	79.661	137.69	103.454	79.661	103.374	93.763	79.3103	50.894	85.253
		80	113.138	121.113	80	71.016	91.637							80	132.938	88.702
			139.811	122.566		78.2515	95.2415		85.7787	84.2303		90.9983	95.679		130.067	86.782		141.906	84.7113		126.488	95.593		81.7283	91.9368		88.4647	82.856		148.976	98.79		80.4093	81.546		150.435	122.325		138.997	105.582		126.458	111.509		103.828	94.4577		51.64	88.9057
80-85		81.25	104.072	117.476	81.4286	49.856	90.049	80.8824	96.321	82.903	80.597	95.577	90.056	81.5385	119.783	91.16	80.9524	147.722	87.892	80.6452	90.316	95.161	80.6452	61.168	85.2514	80.3279	96.222	83.6557	80.3279	137.05	92.184	80.3279	55.374	80.006	81.6667	138.1	114.437	81.3559	178.243	109.061	81.3559	166.124	100.023	81.3559	105.52	96.476	81.0345	62.085	82.614
		82.5	103.971	113.806	82.8571	49.699	89.061	82.3529	104.4	87.715	82.0896	94.384	89.608	83.0769	108.114	90.303	82.5397	168.471	89.949	82.2581	79.623	95.61	82.2581	68.344	86.0278	81.9672	117.914	82.144	81.9672	141.542	89.396	81.9672	50.399	82.719	83.3333	122.405	108.446	83.0508	184.87	109.048	83.0508	179.887	101.986	83.0508	116.866	96.687	82.7586	69.882	78.649
		83.75	99.642	108.639	84.2857	61.849	89.821	83.8235	110.882	90.575	83.5821	98.474	88.04	84.6154	100.952	86.975	84.127	140.225	89.671	83.871	76.227	97.405	83.871	78.268	88.8458	83.6066	135.749	81.7952	83.6066	153.295	88.48	83.6066	40.699	85.998	85	110.193	104.968	84.7458	190.439	106.527	84.7458	175.423	106.964	84.7458	139.834	92.391	84.4828	67.439	75.438
		85	82.039	107.085
			97.431	111.751		53.8013	89.6437		103.868	87.0643		96.145	89.2347		109.616	89.4793		152.139	89.1707		82.0553	96.0587		69.26	86.7083		116.628	82.5316		143.962	90.02		48.824	82.9077		123.566	109.284		184.517	108.212		173.811	102.991		120.74	95.1847		66.4687	78.9003
85-90		86.25	60.389	108.099	85.7143	79.272	89.679	85.2941	114.605	91.942	85.0746	105.624	91.033	86.1538	96.334	84.978	85.7143	106.655	90.515	85.4839	73.589	98.377	85.4839	88.402	89.5167	85.2459	129.305	83.8954	85.2459	147.492	90.81	85.2459	28.556	82.875	86.6667	105.347	102.365	86.4407	182.961	106.43	86.4407	145.358	110.836	86.4407	151.374	89.351	86.2069	64.758	74.106
		87.5	45.43	110.731	87.1429	98.684	88.219	86.7647	109.424	90.666	86.5672	103.54	96.143	87.6923	86.462	84.246	87.3016	83.953	89.537	87.0968	77.345	96.648	87.0968	102.627	87.3859	86.8852	107.487	85.9296	86.8852	137.423	91.627	86.8852	25.111	82.33	88.3333	107.172	102.782	88.1356	151.47	106.49	88.1356	117.278	111.756	88.1356	156.82	88.339	87.931	72.732	74.37
		88.75	42.172	110.258	88.5714	110.284	86.85	88.2353	107.793	90.758	88.0597	94.558	97.254	89.2308	78.226	82.634	88.8889	66.652	92.69	88.7097	75.361	92.395	88.7097	120.033	83.4551	88.5246	88.034	88.528	88.5246	129.775	89.304	88.5246	26.625	82.144	90	132.151	101.588	89.8305	118.673	104	89.8305	98.18	114.185	89.8305	141.212	86.824	89.6552	86.085	76.561
		90	49.213	107.03	90	112.813	88.054	89.7059	108.733	86.898	89.5522	80.463	95.508
			49.301	109.029		100.263	88.2005		110.139	90.066		96.0462	94.9845		87.0073	83.9527		85.7533	90.914		75.4317	95.8067		103.687	86.7859		108.275	86.1177		138.23	90.5803		26.764	82.4497		114.89	102.245		151.035	105.64		120.272	112.259		149.802	88.1713		74.525	75.0123
90-95		91.25	56.369	103.828	91.4286	101.445	90.396	91.1765	101.841	83.945	91.0448	68.435	94.135	90.7692	72.233	81.487	90.4762	69.348	94.935	90.3226	68.793	88.337	90.3226	141.684	82.4595	90.1639	76.375	90.7751	90.1639	117.604	90.362	90.1639	33.545	83.929	91.6667	164.941	102.446	91.5254	104.684	101.813	91.5254	102.172	116.323	91.5254	106.882	88.628	91.3793	98.224	80.27
		92.5	55.573	102.029	92.8571	95.029	91.388	92.6471	92.329	85.395	92.5373	64.118	93.061	92.3077	65.816	83.543	92.0635	79.277	92.449	91.9355	72.505	88.273	91.9355	162.351	85.2308	91.8033	79.713	91.1734	91.8033	116.368	94.853	91.8033	42.635	84.642	93.3333	183.419	111.615	93.2203	107.648	103.511	93.2203	128.688	126.848	93.2203	87.754	91.156	93.1034	101.68	87.179
		93.75	49.981	104.42	94.2857	110.551	93.256	94.1176	84.458	86.385	94.0299	64.112	91.939	93.8462	52.495	81.304	93.6508	93.133	89.628	93.5484	78.401	90.13	93.5484	169.941	88.9482	93.4426	93.649	95.7711	93.4426	124.529	96.545	93.4426	52.702	83.897	95	181.556	118.031	94.9153	124.687	106.618	94.9153	166.324	135.725	94.9153	74.318	86.97	94.8276	92.266	97.246
		95	53.303	111.135
			53.8065	105.353		102.342	91.68		92.876	85.2417		65.555	93.045		63.5147	82.1113		80.586	92.3373		73.233	88.9133		157.992	85.5462		83.2457	92.5732		119.5	93.92		42.9607	84.156		176.639	110.697		112.34	103.981		132.395	126.298		89.6513	88.918		97.39	88.2317
95-100		96.25	67.145	116.451	95.7143	127.798	95.819	95.5882	81.044	89.684	95.5224	72.427	93.815	95.3846	38.451	76.962	95.2381	89.659	92.148	95.1613	83.748	93.719	95.1613	175.281	92.0126	95.082	105.217	105.651	95.082	120.152	96.476	95.082	59.993	82.421	96.6667	150.358	122.436	96.6102	150.067	110.567	96.6102	189.454	137.915	96.6102	62.276	84.793	96.5517	78.55	103.355
		97.5	83.537	116.422	97.1429	126.541	97.825	97.0588	79.309	94.419	97.0149	82.474	96.249	96.9231	32.901	76.635	96.8254	74.631	94.186	96.7742	80.727	97.687	96.7742	170.407	91.6477	96.7213	115.156	104.684	96.7213	101.354	94.603	96.7213	57.688	78.4	98.3333	116.387	122.896	98.3051	178.054	114.385	98.3051	205.912	140	98.3051	58.647	82.094	98.2759	70.056	101.457
		98.75	95.084	112.485	98.5714	116.635	98.359	98.5294	63.793	95.97	98.5075	100.958	98.575	98.4615	35.402	75.291	98.4127	55.394	97.714	98.3871	69.113	97.036	98.3871	161.325	93.1724	98.3607	118.216	99.9753	98.3607	86.404	89.603	98.3607	51.544	75.795	100	92.065	117.326	100	189.163	110.915	100	184.187	133.06	100	62.99	79.733	100	72.897	98.373
		100	90.307	107.28	100	105.264	98.07	100	43.656	94.318	100	109.723	93.812	100	42.834	69.987	100	47.502	98.024	100	55.245	88.203	100	140.69	91.5289	100	115.623	98.3976	100	73.113	83.907	100	45.251	71.349
			84.0183	113.16		119.059	97.5182		66.9505	93.5977		91.3955	95.6128		37.397	74.7188		66.7965	95.518		72.2083	94.1612		161.926	92.0904		113.553	102.177		95.2557	91.1472		53.619	76.9913		119.603	120.886		172.428	111.956		193.184	136.992		61.3043	82.2067		73.8343	101.062
[truncated: 66 more columns]

## Sheet: Summary
% Chromosome Length		Mean	STDDEV	SEM
5	FISH	20.566	7.74274	1.25604
	PI	172.055	21.4344	3.47712
10	FISH	21.5371	10.5069	1.70444
	PI	181.332	24.6177	3.99352
15	FISH	31.027	17.7458	2.87875
	PI	173.835	24.5756	3.98668
20	FISH	53.4059	34.6514	5.62121
	PI	155.892	25.8132	4.18745
25	FISH	79.1002	34.9028	5.66199
	PI	128.209	22.8263	3.70291
30	FISH	102.566	26.6219	4.31865
	PI	107.48	16.348	2.652
35	FISH	110.057	32.7175	5.30749
	PI	98.3383	16.5953	2.69212
40	FISH	114.528	32.8986	5.33686
	PI	97.4573	16.7088	2.71052
45	FISH	105.162	32.9472	5.34474
	PI	98.5368	17.6283	2.85969
50	FISH	100.299	32.318	5.24267
	PI	98.4481	16.5459	2.6841
55	FISH	107.582	33.6357	5.45642
	PI	99.7697	16.8756	2.73759
60	FISH	109.436	38.815	6.29663
	PI	100.412	16.4245	2.66441
65	FISH	111.073	36.3509	5.8969
	PI	100.86	15.2287	2.47042
70	FISH	115.945	44.0743	7.1498
	PI	100.284	16.1522	2.62024
75	FISH	118.195	35.3678	5.73742
	PI	99.8046	17.8026	2.88797
80	FISH	109.165	30.5675	4.9587
	PI	97.6991	16.8849	2.73909
85	FISH	105.722	34.0961	5.53111
	PI	94.4671	13.8727	2.25045
90	FISH	102.558	38.1165	6.18332
	PI	93.4843	13.9142	2.25718
95	FISH	99.4835	32.6313	5.2935
	PI	95.6378	12.7163	2.06285
100	FISH	90.9337	34.5545	5.60548
	PI	95.8363	14.7992	2.40075
