# Supplementary material for: Large domains of heterochromatin direct the formation of short mitotic chromosome loops
Source: eLife. 2020 Sep 11;9:e57212. doi: 10.7554/eLife.57212 (PMC7515631; doi:10.7554/eLife.57212)
Supplement: Figure 1—source data 1. [file elife-57212-fig1-data1.xlsx]

## Sheet: All Values
	B4 FISH	B4 PI		B5 FISH	B5 PI		B6 FISH	B6 PI		B7 FISH	B7 PI		B8 FISH	B8 PI		B9 FISH	B9 PI		B10 FISH	B10 PI		B12 FISH	B12 PI		B13 FISH	B13 PI		B14 FISH	B14 PI		B15 FISH	B15 PI		B16 FISH	B16 PI		B20 FISH	B20 PI		B24 FISH	B24 PI		B25 FISH	B25 PI		B26 FISH	B26 PI
X	Y	Y	X	Y	Y	X	Y	Y	X	Y	Y	X	Y	Y	X	Y	Y	X	Y	Y	X	Y	Y	X	Y	Y	X	Y	Y	X	Y	Y	X	Y	Y	X	Y	Y	X	Y	Y	X	Y	Y	X	Y	Y
0	48	148	0	17	159	0	16	192	0	75	203	0	22	139	0	52	165	0	36	185	0	28	216	0	58	181	0	25	160	0	29	190	0	24	211	0	45	156	0	21	166	0	39	192	0	40	168
1	47.5579	161.134	1	17.7783	165.859	1	12.8534	211.946	1	83.1969	227.176	1	23.4645	156.25	1	52.5514	154.462	1	41	205	1	37.752	212.371	1	47.3175	190.689	1	20.721	166.207	1	32	192	1	23.2041	212.366	1	39.757	189.858	1	19.916	199.154	1	32.114	190.629	1	39.9496	186.286
2	46.824	169.987	2	17.3027	173.542	2	12.3319	222.19	2	79.5543	247.519	2	25.9836	165.35	2	62.6511	157.947	2	40	222	2	49.2449	204.013	2	44.927	195.142	2	22.0581	166.635	2	35	188	2	20.5285	211.891	2	49.7758	210.648	2	15.3908	211.216	2	27.5924	186.254	2	27.3138	184.076
3	39.1419	169.794	3	20.0939	183.994	3	17.688	223.313	3	77.3215	245.335	3	25.041	171.684	3	48.2455	157.102	3	43	215	3	50.0169	198.913	3	49.4063	199.222	3	22.3162	165.648	3	33	181	3	21.3958	190.007	3	46.4112	216.677	3	12.4584	216.708	3	24.2232	181.248	3	25.0279	169.604
4	38.4846	168.915	4	23.2411	193.277	4	21.6457	210.114	4	72.6369	241.55	4	23.4714	175.41	4	48.8356	160.344	4	50	209	4	48.0851	195.478	4	54.991	200.973	4	17.3565	157.535	4	36	170	4	22.3194	168.589	4	42.6185	216.999	4	11.4913	221.184	4	26.2744	171.977	4	26.2766	160.428
5	31.8775	167.371	5	25.7602	200.709	5	23.0232	193.416	5	74.9747	248.812	5	20.2488	178.762	5	59.8092	155.818	5	49	210	5	50.0399	198.154	5	60.8841	195.474	5	17.8467	146.596	5	30	151	5	21.5918	156.865	5	36.7849	212.279	5	13.7955	215.484	5	31.5704	158.77	5	31.4947	148.979
6	26.4903	157.597	6	25.2507	217.777	6	24.5579	172.004	6	73.152	242.003	6	21.6727	183.384	6	47.6975	149.405	6	51	212	6	57.0244	200.371	6	60.8314	194.823	6	19.0555	134.596	6	24	130	6	18.7579	140.206	6	46.1289	199.593	6	17.846	206.935	6	26.7047	152.087	6	34.0183	132.568
7	24.2348	144.827	7	29.6681	212.657	7	25.934	152.609	7	51.9234	233.56	7	27.1182	183.436	7	32.5944	145.374	7	63	198	7	60.5903	203.309	7	78.1114	182.03	7	20.4238	124.864	7	24	118	7	19.396	128.597	7	52.1528	189.19	7	16.8011	198.551	7	29.3292	150.275	7	29.437	120.933
8	28.7751	134.172	8	36.8967	206.458	8	24.8008	144.053	8	44.2668	229.044	8	27.5145	169.699	8	29.5155	142.381	8	64	189	8	62.392	197.544	8	90.2983	168.017	8	17.2378	108.458	8	31	118	8	16.4859	121.268	8	49.8165	179.298	8	13.2901	186.111	8	30.1732	145.573	8	29.2668	109.231
9	39.3834	127.933	9	36.8674	191.513	9	21.8583	144.021	9	42.4062	228.677	9	21.309	161.75	9	36.1056	136.752	9	83	192	9	52.9001	191.699	9	84.0022	159.844	9	16.7544	96.2204	9	33	120	9	14.8742	114.968	9	46.8354	165.108	9	13.5223	175.684	9	29.301	140.264	9	35.0265	98.4684
10	43.0563	127.791	10	40.2598	173.733	10	19.7843	144.991	10	43.3725	227.65	10	18.1057	158.296	10	35.8188	138.696	10	83	192	10	43.4932	189.305	10	84.1046	157.729	10	20.0168	83.2187	10	32	119	10	16.6027	113.978	10	57.3622	147.716	10	15.7765	162.012	10	24.3489	136.798	10	39.56	88.7209
11	56.222	119.036	11	47.7831	162.959	11	18.4628	139.258	11	49.6541	203.268	11	14.8789	152.707	11	31.8675	137.332	11	85	190	11	38.9947	177.151	11	76.3733	161.768	11	23.4881	72.2296	11	26	126	11	17.7809	114.195	11	62.682	140.348	11	20.0637	142.688	11	24.5863	137.392	11	34.346	86.9809
12	56.4708	118.769	12	57.1144	157.406	12	15.5881	133.958	12	74.2599	190.608	12	16.2436	141.019	12	40.8021	132.565	12	73	184	12	37.0624	164.193	12	92.6963	153.203	12	26.2353	68.6812	12	27	130	12	15.6745	113.324	12	52.7512	137.045	12	21.4323	129.361	12	23.9616	139.498	12	30.2322	86.3511
13	52.7411	112.345	13	52.3125	149.485	13	16.4512	136.314	13	95.117	183.938	13	21.0502	134.242	13	41.5079	121.896	13	62	182	13	32.665	156.462	13	93.3612	148.047	13	25.5648	64.7986	13	35	132	13	20.7856	115.849	13	61.4556	129.285	13	18.0074	117.983	13	26.8946	142.22	13	28.971	84.3031
14	50.6216	113.447	14	46.9906	136.472	14	21.6271	138.878	14	78.2154	177.273	14	21.3915	139.513	14	40.377	109.949	14	51	181	14	26.4838	151.444	14	80.2186	144.981	14	22.3127	60.3067	14	47	132	14	20.2371	117.537	14	59.9271	118.882	14	14.2127	108.867	14	28.0397	149.917	14	33.4445	82.6758
15	50.5928	112.498	15	53.8934	127.956	15	21.8097	140.737	15	62.684	160.135	15	19.2443	137.759	15	44.1268	118.133	15	47	175	15	26.1655	152.246	15	71.7718	145.799	15	20.8144	61.9767	15	44.4633	134.683	15	28.7481	122.714	15	57.2996	113.348	15	14.7763	106.673	15	25.1879	143.963	15	44.4939	83.1986
16	53.8001	113.966	16	42.9812	129.31	16	18.2383	139.47	16	81.2564	161.893	16	22.4159	135.707	16	43.2931	130.902	16	42	181	16	30.1885	154.399	16	67.9678	147.885	16	21.3286	66.3788	16	42.3747	138.145	16	32.549	123.557	16	51.5158	113.985	16	13.7519	112.849	16	22.3215	137.748	16	46.3212	86.9329
17	63.4125	114.499	17	31.367	129.847	17	17.1393	141.141	17	97.6628	170.219	17	22.6828	135.339	17	38.9574	126.986	17	48	179	17	33.8195	149.381	17	68.4097	148.995	17	20.1486	68.6724	17	42.7017	143.63	17	43.3973	124.68	17	47.9888	113.072	17	14.6273	114.373	17	19.8159	132.308	17	44.4006	90.2445
18	80.9944	117.949	18	25.5796	129.03	18	15.6945	144.933	18	82.679	180.864	18	25.622	141.024	18	40.3414	115.79	18	41	181	18	34.206	149.918	18	56.6179	143.982	18	18.2315	69.877	18	45.5221	152.64	18	50.9085	126.867	18	48.9687	113.982	18	20.0516	118.609	18	20.1516	131.696	18	49.7941	84.4559
19	97.1202	124.74	19	24.8366	124.096	19	13.7136	146.834	19	58.739	190.289	19	27.7054	133.095	19	45.6925	117.427	19	37	178	19	29.4736	153.902	19	41.594	146.164	19	16.0178	74.2251	19	44.7729	156.79	19	50.1511	129.016	19	44.2684	119.519	19	19.2047	123.261	19	16.4573	131.229	19	38.5039	82.7772
20	95.8285	124.802	20	38.6199	124.239	20	14.0453	140.886	20	63.1802	194.646	20	30.2377	127.645	20	49.2338	120.105	20	37	175	20	36.336	148.843	20	38.0017	150.908	20	14.6313	79.697	20	33.8709	154.711	20	47.7932	129.692	20	29.3756	124.869	20	17.0803	126.124	20	20.1197	129.604	20	44.383	83.0845
21	75.6939	120.999	21	38.8225	125.518	21	15.337	132.598	21	57.1939	194.652	21	26.8547	131.374	21	51.0896	118.361	21	30	178	21	44.0187	145.709	21	38.4353	161.453	21	15.3296	83.3817	21	26.4446	159.164	21	43.2313	125.094	21	32.356	133.077	21	16.3482	126.167	21	20.2914	130.519	21	35.9718	83.5065
22	61.1552	117.669	22	34.695	128.136	22	20.525	131.239	22	62.5001	198.81	22	24.5915	127.499	22	48.2193	118.747	22	30	169	22	55.1789	145.532	22	37.7114	171.122	22	14.7304	91.4005	22	27.2634	160.081	22	36.5541	121.699	22	34.11	141.846	22	16.5676	125.053	22	16.9729	130.482	22	34.5014	84.5674
23	50.7275	124.736	23	42.398	130.318	23	26.1024	126.176	23	57.4419	206.998	23	25.2661	127.108	23	47.65	118.179	23	28.2978	166.426	23	76.8672	144.725	23	41.9535	172.193	23	16.2074	101.866	23	26.1999	168.433	23	25.3179	115.345	23	37.7477	152.744	23	14.8041	121.667	23	15.4718	130.187	23	42.8349	85.9908
24	42.2349	119.327	24	40.3938	129.388	24	30.5159	121.258	24	67.6255	210.531	24	30.51	133.929	24	53.2534	114.196	24	34.2602	169.069	24	115.167	143.583	24	53.4815	175.118	24	18.296	104.974	24	31.858	167.892	24	27.2258	111.19	24	29.0701	156.335	24	15.1162	113.787	24	17.1778	128.114	24	44.5545	87.1676
25	35.7389	118.359	25	33.395	126.207	25	40.8795	111.751	25	70.9719	207.525	25	24.9266	130.78	25	51.2209	115.153	25	38.3723	170.569	25	140.404	143.511	25	60.1529	179.34	25	18.1948	105.639	25	38.7792	168.036	25	35.2632	106.426	25	28.8124	159.522	25	17.6434	108.435	25	21.5448	124.564	25	41.4923	88.6923
26	32.9809	117.608	26	29.483	120.535	26	53.7524	104.56	26	64.4119	206.346	26	26.8419	130.017	26	37.9573	117.41	26	47.6984	170.388	26	144.989	142.905	26	61.4898	177.78	26	15.9216	107.461	26	31.9113	166.708	26	41.6393	98.9354	26	31.6039	161.919	26	15.6264	108.453	26	23.2013	118.199	26	39.8269	88.3341
27	41.0413	121.491	27	22.4409	115.692	27	62.5747	91.4475	27	57.2939	209.429	27	25.7094	131.615	27	41.0329	119.597	27	55.4788	164.566	27	151.688	141.297	27	63.5812	183.728	27	14.6498	103.369	27	34.3295	169.299	27	58.7956	97.055	27	35.0761	167.083	27	18.8387	112.195	27	24.8506	121.171	27	46.6757	93.4122
28	59.5298	119.646	28	24.8086	119.158	28	72.1812	78.1668	28	57.225	214.441	28	23.9704	134.249	28	47.4742	118.906	28	64.4357	158.431	28	151.741	137.329	28	59.5223	182.111	28	14.4703	109.247	28	46.4633	161.796	28	81.2636	93.9908	28	38.5616	166.216	28	19.349	113.598	28	29.8428	124.353	28	55.5476	99.1516
29	77.4915	120.683	29	29.9865	121.061	29	75.9631	71.1982	29	45.4698	205.785	29	19.7614	131.517	29	43.5881	123.304	29	75.2657	147.04	29	170.563	133.573	29	59.2219	182.919	29	15.6595	114.808	29	66.2711	147.409	29	101.522	94.4277	29	35.8478	161.859	29	14.9384	112.147	29	31.0777	132.12	29	56.9161	100.903
30	97.7402	123.534	30	35.653	119.585	30	71.0029	68.3393	30	48.2275	206.263	30	19.7244	133.855	30	36.4712	119.144	30	100.149	132.957	30	182.005	131.218	30	55.609	194.03	30	13.5438	113.625	30	103.025	134.924	30	110.194	100.745	30	34.049	156.965	30	12.0441	111.274	30	34.6385	138.72	30	55.5421	104.946
31	131.303	120.171	31	35.9239	122.059	31	63.1709	66.8195	31	47.4936	210.946	31	19.8467	139.209	31	30.4058	111.318	31	134.809	123.431	31	180.212	126.626	31	59.3721	188.771	31	10.0935	113.963	31	151.685	121.252	31	103.594	105.178	31	34.6199	150.419	31	13.926	112.862	31	40.0577	146.267	31	50.9207	111.888
32	183.804	116.088	32	37.4213	122.717	32	52.2127	73.7647	32	55.0074	207.077	32	18.0673	137.144	32	21.0511	107.582	32	179.527	117.49	32	172.957	121.568	32	43.9943	178.796	32	9.2313	113.554	32	191.078	105.594	32	92.6561	106.992	32	36.197	139.641	32	10.5707	115.081	32	41.247	147.248	32	49.8819	109.075
33	215.404	125.2	33	46.9031	114.332	33	38.2792	86.3902	33	52.6309	198.861	33	20.3249	133.808	33	16.3434	109.694	33	230.513	115.368	33	158.2	121.439	33	33.0001	169.317	33	7.3658	110.791	33	183.885	95.2952	33	69.1471	108.424	33	42.8614	125.24	33	7.7252	113.176	33	45.6011	147.214	33	46.047	103.423
34	211.956	130.872	34	59.784	99.6732	34	32.6443	98.1065	34	59.7943	195.993	34	17.5473	137.085	34	18.1182	116.447	34	251.59	112.85	34	129.565	123.374	34	29.1706	164.113	34	9.5744	106.84	34	186.707	80.1389	34	42.9234	107.44	34	52.7909	118.23	34	9.568	112.156	34	53.225	148.301	34	42.7912	99.74
35	224.154	123.281	35	66.8808	89.2015	35	24.764	108.433	35	95.9131	187.465	35	14.0134	139.996	35	32.6216	117.976	35	242.915	110.335	35	97.2941	122.174	35	38.8813	160.913	35	18.3099	103.642	35	181.181	69.0787	35	26.4177	106.479	35	56.8483	113.554	35	7.5338	115.805	35	68.6779	144.304	35	47.54	92.2246
36	217.072	120.859	36	83.3383	84.3594	36	22.1482	115.299	36	126.978	176.706	36	22.6625	138.114	36	49.6504	110.308	36	220.406	107.336	36	70.754	123.953	36	44.9926	157.719	36	32.7453	97.8229	36	177.071	65.8956	36	15.2823	102.572	36	69.7562	104.382	36	6.5372	118.211	36	79.8176	140.279	36	56.4726	82.796
37	196.676	118.557	37	109.818	77.2562	37	13.5752	122.514	37	161.355	159.139	37	47.2722	139.936	37	71.7887	107.026	37	189.509	106.893	37	45.3139	128.077	37	31.5643	147.305	37	54.6459	89.7809	37	169.037	63.0507	37	7.6316	99.3526	37	85.5923	97.9617	37	3.7934	118.947	37	89.5893	144.484	37	74.0829	82.2068
38	178.076	119.774	38	139.288	77.7233	38	10.6353	130.839	38	198.628	159.452	38	74.9568	136.724	38	97.5486	109.39	38	150.641	111.221	38	26.0119	133.035	38	43.5477	127.963	38	78.318	82.6239	38	144.548	63.2432	38	7.3334	102.665	38	103.067	94.7133	38	3.318	113.056	38	113.439	147.778	38	85.8906	77.451
39	166.751	119.482	39	157.443	78.1839	39	11.4629	128.874	39	223.696	160.759	39	103.284	139.775	39	146.493	102.389	39	104.45	116.427	39	14.5119	139.743	39	53.7873	109.267	39	94.578	74.4728	39	114.565	67.945	39	11.2661	104.931	39	126.116	92.838	39	6.3395	107.052	39	115.163	140.093	39	91.706	76.0218
40	148.387	118.67	40	186.577	80.924	40	11.3359	123.644	40	234.251	151.894	40	138.168	137.347	40	181.133	91.3067	40	73.2845	116.237	40	9.8483	140.597	40	56.7134	91.2847	40	98.0526	67.096	40	83.1538	73.7817	40	17.2674	103.131	40	149.752	90.8467	40	13.6656	99.1952	40	109.68	132.736	40	107.498	78.4768
41	125.388	116.814	41	228.987	85.8397	41	10.8102	118.821	41	181.817	148.968	41	178.058	130.811	41	204.615	85.3262	41	50.019	114.276	41	14.5871	137.339	41	77.6374	77.9674	41	85.3447	60.5837	41	75.1065	86.5116	41	23.3065	99.2737	41	162.348	95.4069	41	24.2315	93.3936	41	93.1374	124.711	41	106.585	80.6285
42	110.924	112.319	42	248.836	88.8904	42	10.7101	118.044	42	169.6	144.182	42	193.147	131.512	42	225.452	87.7208	42	29.9837	119.214	42	19.2224	136.103	42	109.522	74.5966	42	74.4316	55.2984	42	70.1922	100.173				42	166.132	102.293	42	39.3482	87.6071	42	89.1109	117.552	42	92.9413	79.6359
43	81.1835	107.706	43	227.86	89.9997	43	11.8884	119.708	43	187.047	137.679	43	192.922	135.387	43	246.369	93.0848	43	21.719	131.086	43	20.6976	135.142	43	138.079	74.6713	43	71.7231	55.2781	43	58.0553	112.367				43	179.959	108.976	43	57.1412	78.9099	43	85.0311	114.496	43	85.1832	80.6832
44	57.4092	100.149	44	231.998	90	44	13.9729	117.341	44	172.656	136.58	44	196.975	138.591	44	218.387	98.2066	44	22.2377	138.349	44	21.9804	133.858	44	165.373	72.3125	44	73.2063	62.2658	44	45.5166	123.681				44	187.729	114.303	44	70.874	70.9713	44	83.7734	111.713	44	94.1564	83.2031
45	39.6271	95.3543	45	240.165	84.5035	45	18.1318	113.417	45	168.177	134.425	45	175.091	133.631	45	186.645	105.862	45	23.2954	144.556	45	21.0664	127.521	45	167.852	71.7082	45	86.0974	67.1118	45	31.8241	134.05				45	188.961	120.609	45	89.285	64.9691	45	80.1985	105.527	45	102.202	86.3388
46	42.7487	93.2914	46	217.858	87.2265	46	22.2202	111.3	46	150.626	125.553	46	160.064	139.066	46	159.986	108.071	46	31.0231	149.537	46	19.0875	129.107	46	161.543	75.2622	46	105.322	72.0104	46	23.6168	140.172				46	180.854	126.592	46	116.983	60.8139	46	67.3492	103.589	46	98.4706	91.2239
47	52.2246	87.3334	47	202.526	87.0728				47	129.442	120.194	47	152.563	140.532	47	136.74	115.787	47	38.0341	146.749				47	152.931	80.2675	47	138.896	77.043	47	19.0679	149.23				47	152.04	130.427	47	143.57	61.6611	47	51.6319	105.226	47	75.0908	94.926
48	59.5962	83.5645	48	185.072	87.8074				48	129.597	113.877	48	138.271	140.69	48	129.757	126.041	48	40.402	154.589				48	142.386	88.9438	48	167.16	85.5894	48	18.3518	157.423				48	113.019	135.364	48	151.495	62.5072	48	38.4894	104.758	48	76.941	98.1748
49	69.6315	82.4553	49	158.405	97.192				49	150.152	117.152	49	123.865	139.269	49	125.632	139.078	49	39.7607	160.445				49	115.981	103.298	49	180.086	95.0973	49	24.6349	164.357				49	86.7646	144.699	49	155.751	65.235	49	34.8204	98.1433	49	67.8256	100.953
50	80.1067	83.3161	50	133.767	103.316				50	149.669	112.682	50	99.3405	141.629	50	113.993	142.997	50	37.0728	155.231				50	110.267	116.54	50	173.926	98.6452	50	33.6068	171.271				50	68.9765	154.76	50	163.806	70.082	50	28.3251	95.8695	50	61.2313	101.932
51	75.1694	87.3995	51	105.373	104.776				51	122.024	110.567	51	75.4702	143.99	51	102.734	144.206	51	34.2617	150.337				51	93.8762	122.444	51	160.099	96.4447	51	36.802	174.433				51	59.6795	162.492	51	175.996	75.6546	51	22.2542	96.4811	51	57.0244	104.082
52	66.9752	88.6973	52	81.4804	108.354				52	109.142	112.979	52	69.3817	138.623	52	94.4138	148.429	52	35.4069	148.137				52	96.5685	133.597	52	141.488	90.5374	52	34.5016	163.933				52	51.9303	164.257	52	189.064	83.928	52	19.1255	90.2175	52	52.0683	104.294
53	54.9867	87.8963	53	66.0315	111.615				53	96.6709	117.405	53	58.5262	130.378	53	86.3538	148.179	53	37.0451	144.665				53	89.7715	141.912	53	110.861	84.0034	53	33.991	163.75				53	45.9809	162.178	53	204.597	91.6925	53	20.371	84.5131	53	47.3477	102.587
54	40.5231	86.1511	54	52.3827	113.356				54	82.7916	126.01	54	38.4367	132.574	54	62.2721	143.132							54	72.5896	143.084	54	73.1745	81.5971	54	42.6853	161.29				54	39.3984	162.546	54	189.76	98.4141	54	21.0989	79.6113	54	37.1817	99.5627
			55	52.9459	114.785				55	84.2592	131.052	55	29.1366	123.461	55	58.233	144.346							55	54.786	143.285	55	36.8231	82.4662	55	41.3901	157.912				55	25.399	164.076	55	159.001	102.918	55	22.9695	76.6253	55	45.6803	95.6292
			56	63.9966	113.501				56	67.0672	136.123	56	25.3045	122	56	62.2272	136.004							56	41.0784	143.925	56	15.5557	83.4602							56	29.9876	159.256	56	113.375	107.49				56	42.5232	88.713
			57	64.7473	110.807				57	68.6137	142	57	28.6828	117.71	57	76.9659	131.729							57	35.3432	143.728	57	4.3444	83.425							57	34.7019	154.485	57	63.8452	118.095				57	37.4309	82.2343
			58	58.9342	103.186				58	62.3735	141.615	58	26.4951	120.389										58	37.0995	140.206	58	2.3096	83.4385							58	44.4225	153.905	58	32.1477	124.976				58	41.1207	80.3063
			59	49.6351	93.5099				59	55.9859	141.546	59	28.5345	123.96										59	42.736	138.172	59	6.1114	83.5809							59	40.0528	149.541	59	23.1914	129.215				59	44.6777	77.5044
									60	63.2133	140.479	60	29.5198	125.837										60	44.9867	138.288	60	8.8271	78.7914										60	14.8008	127.672
									61	79.2976	132.255	61	30.0349	123.06										61	42.952	132.611	61	7.842	78.8931										61	13.0375	121.904
																								62	31.6175	131.972	62	6.368	82.7376										62	16.6549	117.77
																								63	34.7417	129.065													63	11.2015	115.209
																								64	36.4185	130.094													64	7.5144	114.929
																								65	39.1902	136.848													65	5.8214	112.885
																								66	36.7942	138.14													66	7.263	112.679
																								67	35.3705	129.46													67	9.9885	114.035
																								68	35.9529	119.189													68	12.0487	117.002
																																							69	13.6524	119.624

## Sheet: Binned values
% Chr Length			B24 FISH	B24 PI		B13 FISH	B13 PI		B14 FISH	B14 PI		B7 FISH	B7 PI		B8 FISH	B8 PI		B5 FISH	B5 PI		B20 FISH	B20 PI		B26 FISH	B26 PI		B9 FISH	B9 PI		B15 FISH	B15 PI		B25 FISH	B25 PI		B4 FISH	B4 PI		B10 FISH	B10 PI		B6 FISH	B6 PI		B12 FISH	B12 PI		B16 FISH	B16 PI
		X	Y	Y	X	Y	Y	X	Y	Y	X	Y	Y	X	Y	Y	X	Y	Y	X	Y	Y	X	Y	Y	X	Y	Y	X	Y	Y	X	Y	Y	X	Y	Y	X	Y	Y	X	Y	Y	X	Y	Y	X	Y	Y
0-5		0	21	166	0	58	181	0	25	160	0	75	203	0	22	139	0	17	159	0	45	156	0	40	168	0	52	165	0	29	190	0	39	192	0	48	148	0	36	185	0	16	192	0	28	216	0	24	211
		1.44928	19.916	199.154	1.47059	47.3175	190.689	1.6129	20.721	166.207	1.63934	83.1969	227.176	1.63934	23.4645	156.25	1.69492	17.7783	165.859	1.69492	39.757	189.858	1.69492	39.9496	186.286	1.75439	52.5514	154.462	1.81818	32	192	1.81818	32.114	190.629	1.85185	47.5579	161.134	1.88679	41	205	2.17391	12.8534	211.946	2.17391	37.752	212.371	2.43902	23.2041	212.366
		2.89855	15.3908	211.216	2.94118	44.927	195.142	3.22581	22.0581	166.635	3.27869	79.5543	247.519	3.27869	25.9836	165.35	3.38983	17.3027	173.542	3.38983	49.7758	210.648	3.38983	27.3138	184.076	3.50877	62.6511	157.947	3.63636	35	188	3.63636	27.5924	186.254	3.7037	46.824	169.987	3.77358	40	222	4.34783	12.3319	222.19	4.34783	49.2449	204.013	4.87805	20.5285	211.891
		4.34783	12.4584	216.708	4.41176	49.4063	199.222	4.83871	22.3162	165.648	4.91803	77.3215	245.335	4.91803	25.041	171.684
Average			17.1913	198.27		49.9127	191.513		22.5238	164.622		78.7682	230.758		24.1223	158.071		17.3603	166.133		44.8443	185.502		35.7545	179.454		55.7342	159.136		32	190		32.9021	189.628		47.4606	159.707		39	204		13.7284	208.712		38.3323	210.795		22.5775	211.752
5-10		5.7971	11.4913	221.184	5.88235	54.991	200.973	6.45161	17.3565	157.535	6.55738	72.6369	241.55	6.55738	23.4714	175.41	5.08475	20.0939	183.994	5.08475	46.4112	216.677	5.08475	25.0279	169.604	5.26316	48.2455	157.102	5.45455	33	181	5.45455	24.2232	181.248	5.55556	39.1419	169.794	5.66038	43	215	6.52174	17.688	223.313	6.52174	50.0169	198.913	7.31707	21.3958	190.007
		7.24638	13.7955	215.484	7.35294	60.8841	195.474	8.06452	17.8467	146.596	8.19672	74.9747	248.812	8.19672	20.2488	178.762	6.77966	23.2411	193.277	6.77966	42.6185	216.999	6.77966	26.2766	160.428	7.01754	48.8356	160.344	7.27273	36	170	7.27273	26.2744	171.977	7.40741	38.4846	168.915	7.54717	50	209	8.69565	21.6457	210.114	8.69565	48.0851	195.478	9.7561	22.3194	168.589
		8.69565	17.846	206.935	8.82353	60.8314	194.823	9.67742	19.0555	134.596	9.83607	73.152	242.003	9.83607	21.6727	183.384	8.47458	25.7602	200.709	8.47458	36.7849	212.279	8.47458	31.4947	148.979	8.77193	59.8092	155.818	9.09091	30	151	9.09091	31.5704	158.77	9.25926	31.8775	167.371	9.43396	49	210
Average			14.3776	214.534		58.9022	197.09		18.0862	146.243		73.5879	244.122		21.7976	179.185		23.0317	192.66		41.9382	215.319		27.5997	159.67		52.2968	157.755		33	167.333		27.356	170.665		36.5013	168.693		47.3333	211.333		19.6669	216.714		49.051	197.196		21.8576	179.298
10-15		10.1449	16.8011	198.551	10.2941	78.1114	182.03	11.2903	20.4238	124.864	11.4754	51.9234	233.56	11.4754	27.1182	183.436	10.1695	25.2507	217.777	10.1695	46.1289	199.593	10.1695	34.0183	132.568	10.5263	47.6975	149.405	10.9091	24	130	10.9091	26.7047	152.087	11.1111	26.4903	157.597	11.3208	51	212	10.8696	23.0232	193.416	10.8696	50.0399	198.154	12.1951	21.5918	156.865
		11.5942	13.2901	186.111	11.7647	90.2983	168.017	12.9032	17.2378	108.458	13.1148	44.2668	229.044	13.1148	27.5145	169.699	11.8644	29.6681	212.657	11.8644	52.1528	189.19	11.8644	29.437	120.933	12.2807	32.5944	145.374	12.7273	24	118	12.7273	29.3292	150.275	12.963	24.2348	144.827	13.2075	63	198	13.0435	24.5579	172.004	13.0435	57.0244	200.371	14.6341	18.7579	140.206
		13.0435	13.5223	175.684	13.2353	84.0022	159.844	14.5161	16.7544	96.2204	14.7541	42.4062	228.677	14.7541	21.309	161.75	13.5593	36.8967	206.458	13.5593	49.8165	179.298	13.5593	29.2668	109.231	14.0351	29.5155	142.381	14.5455	31	118	14.5455	30.1732	145.573	14.8148	28.7751	134.172
		14.4928	15.7765	162.012	14.7059	84.1046	157.729
Average			14.8475	180.59		84.1291	166.905		18.1387	109.847		46.1988	230.427		25.3139	171.628		30.6052	212.297		49.3661	189.36		30.9074	120.911		36.6025	145.72		26.3333	122		28.7357	149.312		26.5001	145.532		57	205		23.7905	182.71		53.5322	199.262		20.1748	148.535
15-20		15.942	20.0637	142.688	16.1765	76.3733	161.768	16.129	20.0168	83.2187	16.3934	43.3725	227.65	16.3934	18.1057	158.296	15.2542	36.8674	191.513	15.2542	46.8354	165.108	15.2542	35.0265	98.4684	15.7895	36.1056	136.752	16.3636	33	120	16.3636	29.301	140.264	16.6667	39.3834	127.933	15.0943	64	189	15.2174	25.934	152.609	15.2174	60.5903	203.309	17.0732	19.396	128.597
		17.3913	21.4323	129.361	17.6471	92.6963	153.203	17.7419	23.4881	72.2296	18.0328	49.6541	203.268	18.0328	14.8789	152.707	16.9492	40.2598	173.733	16.9492	57.3622	147.716	16.9492	39.56	88.7209	17.5439	35.8188	138.696	18.1818	32	119	18.1818	24.3489	136.798	18.5185	43.0563	127.791	16.9811	83	192	17.3913	24.8008	144.053	17.3913	62.392	197.544	19.5122	16.4859	121.268
		18.8406	18.0074	117.983	19.1176	93.3612	148.047	19.3548	26.2353	68.6812	19.6721	74.2599	190.608	19.6721	16.2436	141.019	18.6441	47.7831	162.959	18.6441	62.682	140.348	18.6441	34.346	86.9809	19.2982	31.8675	137.332										18.8679	83	192	19.5652	21.8583	144.021	19.5652	52.9001	191.699
Average			19.8345	130.011		87.4769	154.339		23.2467	74.7098		55.7622	207.175		16.4094	150.674		41.6368	176.069		55.6265	151.058		36.3108	91.3901		34.5973	137.593		21.6667	79.6667		17.8833	92.354		27.4799	85.2412		76.6667	191		24.1977	146.895		58.6275	197.517		17.941	124.932
20-25		20.2899	14.2127	108.867	20.5882	80.2186	144.981	20.9677	25.5648	64.7986	21.3115	95.117	183.938	21.3115	21.0502	134.242	20.339	57.1144	157.406	20.339	52.7512	137.045	20.339	30.2322	86.3511	21.0526	40.8021	132.565	20	26	126	20	24.5863	137.392	20.3704	56.222	119.036	20.7547	85	190	21.7391	19.7843	144.991	21.7391	43.4932	189.305	21.9512	14.8742	114.968
		21.7391	14.7763	106.673	22.0588	71.7718	145.799	22.5806	22.3127	60.3067	22.9508	78.2154	177.273	22.9508	21.3915	139.513	22.0339	52.3125	149.485	22.0339	61.4556	129.285	22.0339	28.971	84.3031	22.807	41.5079	121.896	21.8182	27	130	21.8182	23.9616	139.498	22.2222	56.4708	118.769	22.6415	73	184	23.913	18.4628	139.258	23.913	38.9947	177.151	24.3902	16.6027	113.978
		23.1884	13.7519	112.849	23.5294	67.9678	147.885	24.1935	20.8144	61.9767	24.5902	62.684	160.135	24.5902	19.2443	137.759	23.7288	46.9906	136.472	23.7288	59.9271	118.882	23.7288	33.4445	82.6758	24.5614	40.377	109.949	23.6364	35	132	23.6364	26.8946	142.22	24.0741	52.7411	112.345	24.5283	62	182
		24.6377	14.6273	114.373
Average			14.342	110.69		73.3194	146.222		22.8973	62.3607		78.6721	173.782		20.562	137.171		52.1392	147.788		58.0446	128.404		30.8826	84.4433		40.8957	121.47		29.3333	129.333		25.1475	139.703		55.1446	116.717		73.3333	185.333		19.1236	142.124		41.2439	183.228		15.7385	114.473
25-30		26.087	20.0516	118.609	25	68.4097	148.995	25.8065	21.3286	66.3788	26.2295	81.2564	161.893	26.2295	22.4159	135.707	25.4237	53.8934	127.956	25.4237	57.2996	113.348	25.4237	44.4939	83.1986	26.3158	44.1268	118.133	25.4545	47	132	25.4545	28.0397	149.917	25.9259	50.6216	113.447	26.4151	51	181	26.087	15.5881	133.958	26.087	37.0624	164.193	26.8293	17.7809	114.195
		27.5362	19.2047	123.261	26.4706	56.6179	143.982	27.4194	20.1486	68.6724	27.8689	97.6628	170.219	27.8689	22.6828	135.339	27.1186	42.9812	129.31	27.1186	51.5158	113.985	27.1186	46.3212	86.9329	28.0702	43.2931	130.902	27.2727	44.4633	134.683	27.2727	25.1879	143.963	27.7778	50.5928	112.498	28.3019	47	175	28.2609	16.4512	136.314	28.2609	32.665	156.462	29.2683	15.6745	113.324
		28.9855	17.0803	126.124	27.9412	41.594	146.164	29.0323	18.2315	69.877	29.5082	82.679	180.864	29.5082	25.622	141.024	28.8136	31.367	129.847	28.8136	47.9888	113.072	28.8136	44.4006	90.2445	29.8246	38.9574	126.986	29.0909	42.3747	138.145	29.0909	22.3215	137.748	29.6296	53.8001	113.966
					29.4118	38.0017	150.908
Average			18.7789	122.665		51.1558	147.512		19.9029	68.3094		87.1994	170.992		23.5736	137.357		42.7472	129.037		52.2681	113.469		45.0719	86.792		42.1258	125.34		44.6127	134.943		25.183	143.876		51.6715	113.304		49	178		16.0196	135.136		34.8637	160.327		16.7277	113.759
30-35		30.4348	16.3482	126.167	30.8824	38.4353	161.453	30.6452	16.0178	74.2251	31.1475	58.739	190.289	31.1475	27.7054	133.095	30.5085	25.5796	129.03	30.5085	48.9687	113.982	30.5085	49.7941	84.4559	31.5789	40.3414	115.79	30.9091	42.7017	143.63	30.9091	19.8159	132.308	31.4815	63.4125	114.499	30.1887	42	181	30.4348	21.6271	138.878	30.4348	26.4838	151.444	31.7073	20.7856	115.849
		31.8841	16.5676	125.053	32.3529	37.7114	171.122	32.2581	14.6313	79.697	32.7869	63.1802	194.646	32.7869	30.2377	127.645	32.2034	24.8366	124.096	32.2034	44.2684	119.519	32.2034	38.5039	82.7772	33.3333	45.6925	117.427	32.7273	45.5221	152.64	32.7273	20.1516	131.696	33.3333	80.9944	117.949	32.0755	48	179	32.6087	21.8097	140.737	32.6087	26.1655	152.246	34.1463	20.2371	117.537
		33.3333	14.8041	121.667	33.8235	41.9535	172.193	33.871	15.3296	83.3817	34.4262	57.1939	194.652	34.4262	26.8547	131.374	33.8983	38.6199	124.239	33.8983	29.3756	124.869	33.8983	44.383	83.0845				34.5455	44.7729	156.79	34.5455	16.4573	131.229				33.9623	41	181	34.7826	18.2383	139.47	34.7826	30.1885	154.399
		34.7826	15.1162	113.787
Average			15.709	121.668		39.3667	168.256		15.3262	79.1013		59.7044	193.196		28.2659	130.705		29.6787	125.789		40.8709	119.457		44.227	83.4392		28.678	77.7388		44.3322	151.02		18.8083	131.744		72.2035	116.224		43.6667	180.333		20.5584	139.695		27.6126	152.696		20.5114	116.693
35-40		36.2319	17.6434	108.435	35.2941	53.4815	175.118	35.4839	14.7304	91.4005	36.0656	62.5001	198.81	36.0656	24.5915	127.499	35.5932	38.8225	125.518	35.5932	32.356	133.077	35.5932	35.9718	83.5065	35.0877	49.2338	120.105	36.3636	33.8709	154.711	36.3636	20.1197	129.604	35.1852	97.1202	124.74	35.8491	37	178	36.9565	17.1393	141.141	36.9565	33.8195	149.381	36.5854	28.7481	122.714
		37.6812	15.6264	108.453	36.7647	60.1529	179.34	37.0968	16.2074	101.866	37.7049	57.4419	206.998	37.7049	25.2661	127.108	37.2881	34.695	128.136	37.2881	34.11	141.846	37.2881	34.5014	84.5674	36.8421	51.0896	118.361	38.1818	26.4446	159.164	38.1818	20.2914	130.519	37.037	95.8285	124.802	37.7358	37	175	39.1304	15.6945	144.933	39.1304	34.206	149.918	39.0244	32.549	123.557
		39.1304	18.8387	112.195	38.2353	61.4898	177.78	38.7097	18.296	104.974	39.3443	67.6255	210.531	39.3443	30.51	133.929	38.9831	42.398	130.318	38.9831	37.7477	152.744	38.9831	42.8349	85.9908	38.5965	48.2193	118.747							38.8889	75.6939	120.999	39.6226	30	178
					39.7059	63.5812	183.728
Average			17.3695	109.694		59.6763	178.992		16.4113	99.4136		62.5225	205.446		26.7892	129.512		38.6385	127.991		34.7379	142.555		37.7694	84.6882		49.5142	119.071		30.1578	156.937		20.2056	130.062		89.5475	123.514		34.6667	177		16.4169	143.037		34.0127	149.649		30.6486	123.136
40-45		40.5797	19.349	113.598	41.1765	59.5223	182.111	40.3226	18.1948	105.639	40.9836	70.9719	207.525	40.9836	24.9266	130.78	40.678	40.3938	129.388	40.678	29.0701	156.335	40.678	44.5545	87.1676	40.3509	47.65	118.179	40	27.2634	160.081	40	16.9729	130.482	40.7407	61.1552	117.669	41.5094	30	169	41.3043	13.7136	146.834	41.3043	29.4736	153.902	41.4634	43.3973	124.68
		42.029	14.9384	112.147	42.6471	59.2219	182.919	41.9355	15.9216	107.461	42.623	64.4119	206.346	42.623	26.8419	130.017	42.3729	33.395	126.207	42.3729	28.8124	159.522	42.3729	41.4923	88.6923	42.1053	53.2534	114.196	41.8182	26.1999	168.433	41.8182	15.4718	130.187	42.5926	50.7275	124.736	43.3962	28.2978	166.426	43.4783	14.0453	140.886	43.4783	36.336	148.843	43.9024	50.9085	126.867
		43.4783	12.0441	111.274	44.1176	55.609	194.03	43.5484	14.6498	103.369	44.2623	57.2939	209.429	44.2623	25.7094	131.615	44.0678	29.483	120.535	44.0678	31.6039	161.919	44.0678	39.8269	88.3341	43.8596	51.2209	115.153	43.6364	31.858	167.892	43.6364	17.1778	128.114	44.4444	42.2349	119.327
		44.9275	13.926	112.862
Average			15.0644	112.47		58.1177	186.353		16.2554	105.49		64.2259	207.766		25.826	130.804		34.4239	125.377		29.8288	159.259		41.9579	88.0647		50.7081	115.843		28.4404	165.469		16.5408	129.594		51.3725	120.577		29.1489	167.713		13.8794	143.86		32.9048	151.372		47.1529	125.773
45-50		46.3768	10.5707	115.081	45.5882	59.3721	188.771	45.1613	14.4703	109.247	45.9016	57.225	214.441	45.9016	23.9704	134.249	45.7627	22.4409	115.692	45.7627	35.0761	167.083	45.7627	46.6757	93.4122	45.614	37.9573	117.41	45.4545	38.7792	168.036	45.4545	21.5448	124.564	46.2963	35.7389	118.359	45.283	34.2602	169.069	45.6522	15.337	132.598	45.6522	44.0187	145.709	46.3415	50.1511	129.016
		47.8261	7.7252	113.176	47.0588	43.9943	178.796	46.7742	15.6595	114.808	47.541	45.4698	205.785	47.541	19.7614	131.517	47.4576	24.8086	119.158	47.4576	38.5616	166.216	47.4576	55.5476	99.1516	47.3684	41.0329	119.597	47.2727	31.9113	166.708	47.2727	23.2013	118.199	48.1481	32.9809	117.608	47.1698	38.3723	170.569	47.8261	20.525	131.239	47.8261	55.1789	145.532	48.7805	47.7932	129.692
		49.2754	9.568	112.156	48.5294	33.0001	169.317	48.3871	13.5438	113.625	49.1803	48.2275	206.263	49.1803	19.7244	133.855	49.1525	29.9865	121.061	49.1525	35.8478	161.859	49.1525	56.9161	100.903	49.1228	47.4742	118.906	49.0909	34.3295	169.299	49.0909	24.8506	121.171				49.0566	47.6984	170.388
Average			9.28797	113.471		45.4555	178.961		14.5579	112.56		50.3074	208.83		21.1521	133.207		25.7453	118.637		36.4952	165.053		53.0465	97.8223		42.1548	118.638		35.0067	168.014		23.1989	121.311		34.3599	117.983		40.1103	170.008		17.931	131.919		49.5988	145.62		48.9721	129.354
50-55		50.7246	7.5338	115.805	50	29.1706	164.113	50	10.0935	113.963	50.8197	47.4936	210.946	50.8197	19.8467	139.209	50.8475	35.653	119.585	50.8475	34.049	156.965	50.8475	55.5421	104.946	50.8772	43.5881	123.304	50.9091	46.4633	161.796	50.9091	29.8428	124.353	50	41.0413	121.491	50.9434	55.4788	164.566	50	26.1024	126.176	50	76.8672	144.725	51.2195	43.2313	125.094
		52.1739	6.5372	118.211	51.4706	38.8813	160.913	51.6129	9.2313	113.554	52.459	55.0074	207.077	52.459	18.0673	137.144	52.5424	35.9239	122.059	52.5424	34.6199	150.419	52.5424	50.9207	111.888	52.6316	36.4712	119.144	52.7273	66.2711	147.409	52.7273	31.0777	132.12	51.8519	59.5298	119.646	52.8302	64.4357	158.431	52.1739	30.5159	121.258	52.1739	115.167	143.583	53.6585	36.5541	121.699
		53.6232	3.7934	118.947	52.9412	44.9926	157.719	53.2258	7.3658	110.791	54.0984	52.6309	198.861	54.0984	20.3249	133.808	54.2373	37.4213	122.717	54.2373	36.197	139.641	54.2373	49.8819	109.075	54.386	30.4058	111.318	54.5455	103.025	134.924	54.5455	34.6385	138.72	53.7037	77.4915	120.683	54.717	75.2657	147.04	54.3478	40.8795	111.751	54.3478	140.404	143.511
					54.4118	31.5643	147.305	54.8387	9.5744	106.84
Average			5.9548	117.654		36.1522	157.513		9.06625	111.287		51.7106	205.628		19.413	136.72		36.3327	121.454		34.9553	149.008		52.1149	108.636		36.8217	117.922		71.9197	148.043		31.853	131.731		59.3542	120.607		65.0601	156.679		32.4993	119.728		110.813	143.94		39.8927	123.397
55-60		55.0725	3.318	113.056	55.8824	43.5477	127.963	56.4516	18.3099	103.642	55.7377	59.7943	195.993	55.7377	17.5473	137.085	55.9322	46.9031	114.332	55.9322	42.8614	125.24	55.9322	46.047	103.423	56.1404	21.0511	107.582	56.3636	151.685	121.252	56.3636	40.0577	146.267	55.5556	97.7402	123.534	56.6038	100.149	132.957	56.5217	53.7524	104.56	56.5217	144.989	142.905	56.0976	25.3179	115.345
		56.5217	6.3395	107.052	57.3529	53.7873	109.267	58.0645	32.7453	97.8229	57.377	95.9131	187.465	57.377	14.0134	139.996	57.6271	59.784	99.6732	57.6271	52.7909	118.23	57.6271	42.7912	99.74	57.8947	16.3434	109.694	58.1818	191.078	105.594	58.1818	41.247	147.248	57.4074	131.303	120.171	58.4906	134.809	123.431	58.6957	62.5747	91.4475	58.6957	151.688	141.297	58.5366	27.2258	111.19
		57.971	13.6656	99.1952	58.8235	56.7134	91.2847	59.6774	54.6459	89.7809	59.0164	126.978	176.706	59.0164	22.6625	138.114	59.322	66.8808	89.2015	59.322	56.8483	113.554	59.322	47.54	92.2246	59.6491	18.1182	116.447							59.2593	183.804	116.088
		59.4203	24.2315	93.3936
Average			11.8887	103.174		51.3495	109.505		35.2337	97.0821		94.2284	186.721		18.0744	138.398		57.856	101.069		50.8335	119.008		45.4594	98.4626		18.5042	111.241		171.382	113.423		40.6523	146.757		137.616	119.931		117.479	128.194		58.1636	98.0039		148.339	142.101		26.2719	113.267
60-65		60.8696	39.3482	87.6071	60.2941	77.6374	77.9674	61.2903	78.318	82.6239	60.6557	161.355	159.139	60.6557	47.2722	139.936	61.0169	83.3383	84.3594	61.0169	69.7562	104.382	61.0169	56.4726	82.796	61.4035	32.6216	117.976	60	183.885	95.2952	60	45.6011	147.214	61.1111	215.404	125.2	60.3774	179.527	117.49	60.8696	72.1812	78.1668	60.8696	151.741	137.329	60.9756	35.2632	106.426
		62.3188	57.1412	78.9099	61.7647	109.522	74.5966	62.9032	94.578	74.4728	62.2951	198.628	159.452	62.2951	74.9568	136.724	62.7119	109.818	77.2562	62.7119	85.5923	97.9617	62.7119	74.0829	82.2068	63.1579	49.6504	110.308	61.8182	186.707	80.1389	61.8182	53.225	148.301	62.963	211.956	130.872	62.2642	230.513	115.368	63.0435	75.9631	71.1982	63.0435	170.563	133.573	63.4146	41.6393	98.9354
		63.7681	70.874	70.9713	63.2353	138.079	74.6713	64.5161	98.0526	67.096	63.9344	223.696	160.759	63.9344	103.284	139.775	64.4068	139.288	77.7233	64.4068	103.067	94.7133	64.4068	85.8906	77.451	64.9123	71.7887	107.026	63.6364	181.181	69.0787	63.6364	68.6779	144.304	64.8148	224.154	123.281	64.1509	251.59	112.85
					64.7059	165.373	72.3125
Average			55.7878	79.1628		122.653	74.8869		90.3162	74.7309		194.56	159.783		75.1708	138.812		110.815	79.7796		86.1384	99.0192		72.1487	80.8179		51.3536	111.77		183.924	81.5043		55.8347	146.606		217.171	126.451		220.543	115.236		74.0721	74.6825		161.152	135.451		38.4513	102.681
65-70		65.2174	89.285	64.9691	66.1765	167.852	71.7082	66.129	85.3447	60.5837	65.5738	234.251	151.894	65.5738	138.168	137.347	66.1017	157.443	78.1839	66.1017	126.116	92.838	66.1017	91.706	76.0218	66.6667	97.5486	109.39	65.4545	177.071	65.8956	65.4545	79.8176	140.279	66.6667	217.072	120.859	66.0377	242.915	110.335	65.2174	71.0029	68.3393	65.2174	182.005	131.218	65.8537	58.7956	97.055
		66.6667	116.983	60.8139	67.6471	161.543	75.2622	67.7419	74.4316	55.2984	67.2131	181.817	148.968	67.2131	178.058	130.811	67.7966	186.577	80.924	67.7966	149.752	90.8467	67.7966	107.498	78.4768	68.4211	146.493	102.389	67.2727	169.037	63.0507	67.2727	89.5893	144.484	68.5185	196.676	118.557	67.9245	220.406	107.336	67.3913	63.1709	66.8195	67.3913	180.212	126.626	68.2927	81.2636	93.9908
		68.1159	143.57	61.6611	69.1176	152.931	80.2675	69.3548	71.7231	55.2781	68.8525	169.6	144.182	68.8525	193.147	131.512	69.4915	228.987	85.8397	69.4915	162.348	95.4069	69.4915	106.585	80.6285				69.0909	144.548	63.2432	69.0909	113.439	147.778				69.8113	189.509	106.893	69.5652	52.2127	73.7647	69.5652	172.957	121.568
		69.5652	151.495	62.5072
Average			125.333	62.4878		160.776	75.746		77.1665	57.0534		195.223	148.348		169.791	133.223		191.002	81.6492		146.072	93.0305		101.93	78.3757		122.021	105.89		163.552	64.0632		94.2821	144.18		206.874	119.708		217.61	108.188		62.1288	69.6412		178.391	126.47		70.0296	95.5229
70-75		71.0145	155.751	65.235	70.5882	142.386	88.9438	70.9677	73.2063	62.2658	70.4918	187.047	137.679	70.4918	192.922	135.387	71.1864	248.836	88.8904	71.1864	166.132	102.293	71.1864	92.9413	79.6359	70.1754	181.133	91.3067	70.9091	114.565	67.945	70.9091	115.163	140.093	70.3704	178.076	119.774	71.6981	150.641	111.221	71.7391	38.2792	86.3902	71.7391	158.2	121.439	70.7317	101.522	94.4277
		72.4638	163.806	70.082	72.0588	115.981	103.298	72.5806	86.0974	67.1118	72.1311	172.656	136.58	72.1311	196.975	138.591	72.8814	227.86	89.9997	72.8814	179.959	108.976	72.8814	85.1832	80.6832	71.9298	204.615	85.3262	72.7273	83.1538	73.7817	72.7273	109.68	132.736	72.2222	166.751	119.482	73.5849	104.45	116.427	73.913	32.6443	98.1065	73.913	129.565	123.374	73.1707	110.194	100.745
		73.913	175.996	75.6546	73.5294	110.267	116.54	74.1935	105.322	72.0104	73.7705	168.177	134.425	73.7705	175.091	133.631	74.5763	231.998	90	74.5763	187.729	114.303	74.5763	94.1564	83.2031	73.6842	225.452	87.7208	74.5455	75.1065	86.5116	74.5455	93.1374	124.711	74.0741	148.387	118.67
Average			165.185	70.3239		122.878	102.927		88.2086	67.1293		175.96	136.228		188.329	135.87		236.231	89.63		177.94	108.524		90.7603	81.1741		203.733	88.1179		90.9418	76.0794		105.993	132.513		164.405	119.309		127.546	113.824		35.4618	92.2483		143.882	122.406		105.858	97.5863
75-80		75.3623	189.064	83.928	75	93.8762	122.444	75.8065	138.896	77.043	75.4098	150.626	125.553	75.4098	160.064	139.066	76.2712	240.165	84.5035	76.2712	188.961	120.609	76.2712	102.202	86.3388	75.4386	246.369	93.0848	76.3636	70.1922	100.173	76.3636	89.1109	117.552	75.9259	125.388	116.814	75.4717	73.2845	116.237	76.087	24.764	108.433	76.087	97.2941	122.174	75.6098	103.594	105.178
		76.8116	204.597	91.6925	76.4706	96.5685	133.597	77.4194	167.16	85.5894	77.0492	129.442	120.194	77.0492	152.563	140.532	77.9661	217.858	87.2265	77.9661	180.854	126.592	77.9661	98.4706	91.2239	77.193	218.387	98.2066	78.1818	58.0553	112.367	78.1818	85.0311	114.496	77.7778	110.924	112.319	77.3585	50.019	114.276	78.2609	22.1482	115.299	78.2609	70.754	123.953	78.0488	92.6561	106.992
		78.2609	189.76	98.4141	77.9412	89.7715	141.912	79.0323	180.086	95.0973	78.6885	129.597	113.877	78.6885	138.271	140.69	79.661	202.526	87.0728	79.661	152.04	130.427	79.661	75.0908	94.926	78.9474	186.645	105.862										79.2453	29.9837	119.214
		79.7101	159.001	102.918	79.4118	72.5896	143.084
Average			185.605	94.2381		88.2015	135.259		162.047	85.9099		136.555	119.874		150.299	140.096		220.183	86.2676		173.952	125.876		91.9212	90.8296		217.134	99.0511		64.1238	106.27		87.071	116.024		118.156	114.566		51.0957	116.576		23.4561	111.866		84.0241	123.063		98.125	106.085
80-85		81.1594	113.375	107.49	80.8824	54.786	143.285	80.6452	173.926	98.6452	80.3279	150.152	117.152	80.3279	123.865	139.269	81.3559	185.072	87.8074	81.3559	113.019	135.364	81.3559	76.941	98.1748	80.7018	159.986	108.071	80	45.5166	123.681	80	83.7734	111.713	79.6296	81.1835	107.706	81.1321	21.719	131.086	80.4348	13.5752	122.514	80.4348	45.3139	128.077	80.4878	69.1471	108.424
		82.6087	63.8452	118.095	82.3529	41.0784	143.925	82.2581	160.099	96.4447	81.9672	149.669	112.682	81.9672	99.3405	141.629	83.0508	158.405	97.192	83.0508	86.7646	144.699	83.0508	67.8256	100.953	82.4561	136.74	115.787	81.8182	31.8241	134.05	81.8182	80.1985	105.527	81.4815	57.4092	100.149	83.0189	22.2377	138.349	82.6087	10.6353	130.839	82.6087	26.0119	133.035	82.9268	42.9234	107.44
		84.058	32.1477	124.976	83.8235	35.3432	143.728	83.871	141.488	90.5374	83.6066	122.024	110.567	83.6066	75.4702	143.99	84.7458	133.767	103.316	84.7458	68.9765	154.76	84.7458	61.2313	101.932	84.2105	129.757	126.041	83.6364	23.6168	140.172	83.6364	67.3492	103.589	83.3333	39.6271	95.3543	84.9057	23.2954	144.556	84.7826	11.4629	128.874	84.7826	14.5119	139.743
Average			69.7893	116.854		43.7359	143.646		158.504	95.2091		140.615	113.467		99.5586	141.629		159.082	96.105		89.5866	144.941		68.666	100.353		142.161	116.633		33.6525	132.634		77.107	106.943		59.4066	101.07		22.4174	137.997		11.8911	127.409		28.6126	133.618		56.0352	107.932
85-90		85.5072	23.1914	129.215	85.2941	37.0995	140.206	85.4839	110.861	84.0034	85.2459	109.142	112.979	85.2459	69.3817	138.623	86.4407	105.373	104.776	86.4407	59.6795	162.492	86.4407	57.0244	104.082	85.9649	125.632	139.078	85.4545	19.0679	149.23	85.4545	51.6319	105.226	85.1852	42.7487	93.2914	86.7925	31.0231	149.537	86.9565	11.3359	123.644	86.9565	9.8483	140.597	85.3659	26.4177	106.479
		86.9565	14.8008	127.672	86.7647	42.736	138.172	87.0968	73.1745	81.5971	86.8852	96.6709	117.405	86.8852	58.5262	130.378	88.1356	81.4804	108.354	88.1356	51.9303	164.257	88.1356	52.0683	104.294	87.7193	113.993	142.997	87.2727	18.3518	157.423	87.2727	38.4894	104.758	87.037	52.2246	87.3334	88.6792	38.0341	146.749	89.1304	10.8102	118.821	89.1304	14.5871	137.339	87.8049	15.2823	102.572
		88.4058	13.0375	121.904	88.2353	44.9867	138.288	88.7097	36.8231	82.4662	88.5246	82.7916	126.01	88.5246	38.4367	132.574	89.8305	66.0315	111.615	89.8305	45.9809	162.178	89.8305	47.3477	102.587	89.4737	102.734	144.206	89.0909	24.6349	164.357	89.0909	34.8204	98.1433	88.8889	59.5962	83.5645
		89.8551	16.6549	117.77	89.7059	42.952	132.611
Average			16.9212	124.14		41.9436	137.319		73.6196	82.6889		96.2016	118.798		55.4482	133.859		84.2949	108.248		52.5302	162.976		52.1468	103.654		114.119	142.094		20.6849	157.003		41.6472	102.709		51.5232	88.0631		34.5286	148.143		11.0731	121.233		12.2177	138.968		20.85	104.525
90-95		91.3043	11.2015	115.209	91.1765	31.6175	131.972	90.3226	15.5557	83.4602	90.1639	84.2592	131.052	90.1639	29.1366	123.461	91.5254	52.3827	113.356	91.5254	39.3984	162.546	91.5254	37.1817	99.5627	91.2281	94.4138	148.429	90.9091	33.6068	171.271	90.9091	28.3251	95.8695	90.7407	69.6315	82.4553	90.566	40.402	154.589	91.3043	10.7101	118.044	91.3043	19.2224	136.103	90.2439	7.6316	99.3526
		92.7536	7.5144	114.929	92.6471	34.7417	129.065	91.9355	4.3444	83.425	91.8033	67.0672	136.123	91.8033	25.3045	122	93.2203	52.9459	114.785	93.2203	25.399	164.076	93.2203	45.6803	95.6292	92.9825	86.3538	148.179	92.7273	36.802	174.433	92.7273	22.2542	96.4811	92.5926	80.1067	83.3161	92.4528	39.7607	160.445	93.4783	11.8884	119.708	93.4783	20.6976	135.142	92.6829	7.3334	102.665
		94.2029	5.8214	112.885	94.1176	36.4185	130.094	93.5484	2.3096	83.4385	93.4426	68.6137	142	93.4426	28.6828	117.71	94.9153	63.9966	113.501	94.9153	29.9876	159.256	94.9153	42.5232	88.713	94.7368	62.2721	143.132	94.5455	34.5016	163.933	94.5455	19.1255	90.2175	94.4444	75.1694	87.3995	94.3396	37.0728	155.231
Average			8.1791	114.341		34.2592	130.377		7.40323	83.4412		73.3134	136.391		27.708	121.057		56.4417	113.881		31.595	161.96		41.7951	94.635		81.0132	146.58		34.9701	169.879		23.2349	94.1894		74.9692	84.3903		39.0785	156.755		11.2993	118.876		19.96	135.623		7.4825	101.009
95-100		95.6522	7.263	112.679	95.5882	39.1902	136.848	95.1613	6.1114	83.5809	95.082	62.3735	141.615	95.082	26.4951	120.389	96.6102	64.7473	110.807	96.6102	34.7019	154.485	96.6102	37.4309	82.2343	96.4912	58.233	144.346	96.3636	33.991	163.75	96.3636	20.371	84.5131	96.2963	66.9752	88.6973	96.2264	34.2617	150.337	95.6522	13.9729	117.341	95.6522	21.9804	133.858	95.122	11.2661	104.931
		97.1014	9.9885	114.035	97.0588	36.7942	138.14	96.7742	8.8271	78.7914	96.7213	55.9859	141.546	96.7213	28.5345	123.96	98.3051	58.9342	103.186	98.3051	44.4225	153.905	98.3051	41.1207	80.3063	98.2456	62.2272	136.004	98.1818	42.6853	161.29	98.1818	21.0989	79.6113	98.1481	54.9867	87.8963	98.1132	35.4069	148.137	97.8261	18.1318	113.417	97.8261	21.0664	127.521	97.561	17.2674	103.131
		98.5507	12.0487	117.002	98.5294	35.3705	129.46	98.3871	7.842	78.8931	98.3607	63.2133	140.479	98.3607	29.5198	125.837	100	49.6351	93.5099	100	40.0528	149.541	100	44.6777	77.5044	100	76.9659	131.729	100	41.3901	157.912	100	22.9695	76.6253	100	40.5231	86.1511	100	37.0451	144.665	100	22.2202	111.3	100	19.0875	129.107	100	23.3065	99.2737
		100	13.6524	119.624	100	35.9529	119.189	100	6.368	82.7376	100	79.2976	132.255	100	30.0349	123.06
Average			10.7382	115.835		36.8269	130.909		7.28712	81.0007		65.2176	138.974		28.6461	123.312		57.7722	102.501		39.7257	152.643		41.0764	80.015		65.8087	137.36		39.3555	160.984		21.4798	80.2499		54.1617	87.5816		35.5712	147.713		18.1083	114.019		20.7114	130.162		17.28	102.445

## Sheet: Summary
% Chromosome Length		Mean	STDDEV	SEM
5	FISH	35.7633	16.5094	4.12735
	PI	188.003	21.44	5.35999
10	FISH	35.399	16.4142	4.10355
	PI	188.613	26.0608	6.5152
15	FISH	35.761	17.5331	4.38328
	PI	167.502	33.9961	8.49903
20	FISH	38.4602	21.5172	5.3793
	PI	136.914	41.7783	10.4446
25	FISH	40.6762	21.1908	5.2977
	PI	132.703	31.7054	7.92635
30	FISH	38.8064	18.1019	4.52548
	PI	130.051	27.4694	6.86736
35	FISH	34.345	15.6054	3.90136
	PI	130.485	32.6883	8.17207
40	FISH	37.4428	19.055	4.76375
	PI	137.544	30.0459	7.51147
45	FISH	34.7405	15.4655	3.86638
	PI	139.737	30.5037	7.62594
50	FISH	34.2113	13.5432	3.38579
	PI	139.462	29.3711	7.34278
55	FISH	43.3696	24.8299	6.20748
	PI	135.622	23.753	5.93825
60	FISH	67.7081	48.7701	12.1925
	PI	120.396	22.9811	5.74529
65	FISH	113.131	60.3459	15.0865
	PI	105.086	28.1038	7.02594
70	FISH	142.636	48.9932	12.2483
	PI	97.7236	28.9688	7.24219
75	FISH	138.957	50.5164	12.6291
	PI	102.118	22.2683	5.56707
80	FISH	121.997	56.6974	14.1743
	PI	110.741	15.9447	3.98617
85	FISH	78.8013	47.239	11.8097
	PI	119.778	17.1063	4.27659
90	FISH	48.7344	29.7042	7.42606
	PI	123.401	23.1015	5.77538
95	FISH	35.7939	23.618	5.9045
	PI	122.712	26.4048	6.60121
100	FISH	34.9854	18.0506	4.51266
	PI	117.857	25.9237	6.48093
