# Supplementary material for: Large domains of heterochromatin direct the formation of short mitotic chromosome loops
Source: eLife. 2020 Sep 11;9:e57212. doi: 10.7554/eLife.57212 (PMC7515631; doi:10.7554/eLife.57212)
Supplement: Figure 1—source data 2. [file elife-57212-fig1-data2.xlsx]

## Sheet: All Values
	A1	FISH	IF	A2	FISH	IF	A3	FISH	IF	A4	FISH	IF	A6	IF	FISH	A12	FISH	IF	A18	FISH	IF	A20	FISH	IF	A23	FISH	IF	A24	FISH	IF	A26	FISH	IF	B02	FISH	IF	B06	FISH	IF	B08	FISH	IF	B10	FISH	IF	B11	FISH	IF	B12
	X	Y	Y	X	Y	Y	X	Y	Y	X	Y	Y	X	Y	Y	X	Y	Y	X	Y	Y	X	Y	Y	X	Y	Y	X	Y	Y	X	Y	Y	X	Y	Y	X	Y	Y	X	Y	Y	X	Y	Y	X	Y	Y	X
	0	1	117	0	21	123	0	10	105	0	26	113	0	8	89	0	6	79	0	7	102	0	18	88	0	18	106	0	17	116	0	12	112	0	43	134	0	13	109	0	42	122	0	8	56	0	7	156	0
	1	1.922	120.912	1	22.604	126.543	1	11.789	107.88	1	31.233	121.24	1	7.8216	100.884	1	6	83.4203	1	7	102.611	1	19.345	86.439	1	18.6027	103.3	1	15.9733	113.893	1	10.772	109.12	1	41.596	135.11	1	13.5651	100.185	1	40.018	121.36	1	9.397	56.5586	1	7.9285	160.722	1
	2	2	125.16	2	23.246	126.623	2	13.351	110.026	2	26.464	117.873	2	8.3057	106.532	2	6.2804	87.3127	2	7.714	108.31	2	20.455	87.079	2	18.577	104.769	2	14.9467	118.78	2	10.024	105.812	2	32.2202	129.552	2	14.6958	100.294	2	36.696	121.447	2	11.405	58.5383	2	7.3635	162.714	2
	3	2	126.791	3	22.954	128.535	3	15.934	110.819	3	32.434	122.069	3	8.209	105.663	3	6.9206	91.9072	3	8.535	106.899	3	21.684	88.951	3	19.0108	103.103	3	14.9999	120.16	3	10.743	102.724	3	26.5962	125.285	3	14.3752	98.8628	3	33.653	119.976	3	12.201	55.0415	3	7	157.01	3
	4	2	124.593	4	23.66	137.209	4	15.668	109.467	4	31.491	124.448	4	8.9453	109.21	4	6.4481	94.5414	4	7.898	105.626	4	22.722	96.29	4	19.6779	106.458	4	15.8906	123.887	4	10.041	103.533	4	22.9888	112.43	4	14.4426	103.318	4	31.302	123.501	4	14.14	55.4811	4	7.0206	155.029	4
	5	2	126.499	5	22.648	147.665	5	13.649	108.391	5	31.364	122.73	5	9.2985	109.987	5	6.8411	106.659	5	8.221	101.843	5	21.944	100.937	5	19.7249	106.297	5	15.9998	123.136	5	8.79	102.044	5	19.2427	107.581	5	15.5689	102.512	5	30.456	127.718	5	14.713	60.0757	5	6.6528	154.378	5
	6	2	127.487	6	22.457	152.337	6	11.269	108.233	6	43.474	119.266	6	9.3582	111.597	6	6.3907	119.784	6	8.492	97.772	6	23.784	104.738	6	19	105.301	6	14.3279	123.675	6	9.959	101.474	6	17.8197	101.078	6	18.5568	103.751	6	32.669	130.18	6	14.084	67.1476	6	7.6689	152.401	6
	7	2.0687	129.915	7	23.92	154.252	7	10.198	109.437	7	53.062	116.474	7	9.15	112.44	7	6	133.147	7	9.143	99.294	7	24.896	108.156	7	19.1063	112.021	7	15.8072	123.567	7	9.972	100.055	7	18.0381	104.982	7	20.0577	105.714	7	32.514	133.367	7	13.394	71.7166	7	8.1999	150.803	7
	8	2.3185	134.906	8	24.905	156.639	8	9.626	110.761	8	60.826	119.965	8	8.0642	115.363	8	6.0743	139.402	8	10.903	100.339	8	23.415	112.413	8	19.5044	113.966	8	15.9994	129.28	8	9.103	98.5072	8	17.2377	109.843	8	20.3793	97.9254	8	33.251	136.386	8	12.114	80.2781	8	8.0165	147.889	8
	9	2.0748	139.296	9	25.016	156.169	9	9.759	114.28	9	63.193	122.595	9	8.5708	113.302	9	6.6592	136.521	9	9.168	94.794	9	24.248	119.316	9	19.6562	117.625	9	15.7576	128.947	9	9	101.336	9	17.704	112.628	9	20.6327	93.9354	9	31.061	133.145	9	13.116	89.1843	9	7.7657	148.063	9
	10	2.7008	140.872	10	23.395	155.125	10	9.306	117.969	10	53.175	119.583	10	8.2337	109.781	10	6.3527	131.682	10	9.603	95.066	10	31.092	121.79	10	21.1922	119.278	10	14.4643	127.896	10	9	104.418	10	17.3832	111.11	10	18.5924	94.2567	10	30.713	132.545	10	13.061	106.538	10	7.9987	146.391	10
	11	1.6746	142.854	11	23.737	157.67	11	10.042	119.042	11	41.179	122.592	11	8.3988	109.946	11	6.9051	130.708	11	10.829	99.689	11	38.445	126.64	11	20.0041	123	11	14.9976	131.176	11	9	109.749	11	18.134	104.145	11	17.5573	96.4172	11	32.023	131.202	11	13.011	109.906	11	9.2496	142.824	11
	12	1.7707	142.401	12	24.313	159.916	12	10.984	121.557	12	37.626	119.945	12	8.264	108.906	12	6.8209	127.102	12	9.565	106.48	12	46.78	135.31	12	19.7301	130.159	12	15.3228	128.283	12	9.735	116.572	12	19.2349	99.2954	12	15.8965	97.5489	12	32.736	131.242	12	13.472	112.328	12	11.1968	141.329	12
	13	1.7432	143.322	13	24.697	158.067	13	11.58	117.799	13	36.438	120.022	13	8.6795	105.489	13	7.4606	125.635	13	8.976	109.657	13	49.287	138.201	13	21.7783	132.852	13	14.356	128.352	13	10.923	120.943	13	19.5454	99.4926	13	15.5034	96.9651	13	35.977	131.318	13	14.306	116.449	13	13.598	145.528	13
	14	2	141.567	14	23.988	156.09	14	12.038	120.821	14	31.036	121.107	14	9.3101	103.215	14	7.1648	129.127	14	9.254	113.794	14	42.877	136.421	14	22.8691	131.081	14	15.2391	126.791	14	11.116	119.216	14	20.9069	101.559	14	13.4925	98.6128	14	35.217	134.2	14	13.691	124.393	14	13.0011	148.198	14
	15	2	136.659	15	23.607	159.087	15	11.811	120.587	15	31.789	123.408	15	10.0978	100.07	15	7.1293	127.064	15	9.286	113.779	15	34.203	135.347	15	22.4038	134.832	15	15.5925	135.145	15	11.624	120.315	15	24.4484	104.581	15	14.0364	93.6901	15	35.367	135.97	15	14.429	129.827	15	13.3979	142.212	15
	16	2	129.227	16	24.254	165.411	16	10.584	118.807	16	35.428	121.297	16	9.3995	99.627	16	7.9576	125.578	16	9.839	113.55	16	27.9	131.429	16	23.6271	135.925	16	15.0033	132.448	16	12.103	116.221	16	25.9822	104.463	16	15.0254	97.6097	16	35.304	138.747	16	13.209	136.441	16	12.1527	148.109	16
	17	2	127.281	17	22.595	171.661	17	10.49	115.966	17	30.414	118.555	17	8.5001	96.652	17	8.1526	121.061	17	9.975	110.77	17	24.104	130.01	17	24.5486	136.399	17	15	134.204	17	14.742	118.583	17	26.489	98.6043	17	13.9611	100.249	17	32.323	145.154	17	12.29	138.811	17	11.7541	152.65	17
	18	2	124.504	18	23.205	177.634	18	10.363	110.358	18	29.328	118.466	18	8.4331	93.964	18	8.2131	116.186	18	8.321	121.953	18	23.999	125.127	18	24.062	137.214	18	15	140.474	18	17.725	120.542	18	24.8859	93.3074	18	14.1718	100.707	18	32.613	152.027	18	12.753	140.738	18	13.0038	154.937	18
	19	2	121.496	19	23.841	179.525	19	10.261	105.305	19	31.448	121.673	19	7.1455	91.045	19	8	117.702	19	8.319	124.177	19	24.524	125.98	19	25.4315	140.567	19	14.5167	144.995	19	18.712	125.493	19	25.6433	88.7964	19	14.6289	102.257	19	31.672	156.486	19	10.517	129.031	19	13.8872	154.072	19
	20	1.8969	120.101	20	23.897	178.611	20	10.808	103.666	20	31.317	127.508	20	8.1134	93.25	20	7.9859	121.946	20	8.806	142.043	20	23.673	125.891	20	22.0107	138.274	20	14.0039	149.588	20	18.106	129.801	20	27.1427	84.696	20	16.0375	108.499	20	32.022	154.61	20	10.294	125.074	20	12.249	154.238	20
	21	2	117.682	21	23.386	181.261	21	10.493	108.093	21	32.632	132.034	21	8.0587	93.249	21	8.5585	125.857	21	8.571	150.619	21	24.411	120.371	21	22.3793	137.426	21	13.437	156.944	21	18.289	135.893	21	29.406	84.1104	21	16.341	112.883	21	30.14	148.878	21	9.859	114.627	21	10.7028	154.413	21
	22	2	111.859	22	23.73	179.135	22	11.218	109.814	22	32.212	132.741	22	7.9085	94.248	22	9.9323	127.777	22	7.596	158.604	22	25.648	118.562	22	23.9892	136.998	22	13.4056	163.326	22	18.225	139.809	22	28.5388	85.3368	22	16.4368	112.547	22	30.955	145.615	22	9.436	108.703	22	9.4029	150.246	22
	23	2	109.568	23	23.029	181.864	23	13.128	109.134	23	32.734	129.026	23	8	95.011	23	8.9639	124.888	23	7.342	157.777	23	26.499	119.906	23	23.2787	131.502	23	15.978	163.486	23	18.189	136.887	23	27.6775	88.1247	23	14.937	112.041	23	31.534	144.681	23	9.235	103.168	23	8.1031	150.203	23
	24	2	110.615	24	24.223	184.483	24	14.567	106.678	24	34.703	123.603	24	8.9109	97.535	24	9.1891	128.125	24	7.325	152.156	24	28.635	116.075	24	22.5328	127.435	24	14.7145	165.042	24	16.862	139.599	24	21.3249	100.404	24	14.1865	113.88	24	30.258	142.401	24	10.319	99.3267	24	7.321	152.445	24
	25	2	111.818	25	23.732	185.472	25	13.294	100.208	25	31.527	122.487	25	9.5419	100.381	25	10.1615	131.159	25	7.298	140.475	25	27.028	122.065	25	23.0016	122.289	25	16.9525	166.634	25	16	140.953	25	19.8299	102.448	25	13.2311	110.846	25	29.002	138.233	25	10.799	95.3034	25	7.624	151.363	25
	26	2	111.299	26	23.922	190.977	26	13.252	95.9272	26	32.814	122.109	26	9.5923	102.21	26	10.834	137.199	26	6.111	122.927	26	28.428	119.63	26	22.6059	129.455	26	19.8642	169.46	26	15.869	143.808	26	17.338	101.878	26	14.9339	111.325	26	30.256	142.843	26	9.191	93	26	7.7044	152.532	26
	27	2	111.769	27	24.551	202.439	27	14.359	95.5289	27	34.141	123.13	27	9.7632	100.449	27	10.8102	140.761	27	6.541	113.854	27	25.87	119.532	27	21.7032	129.323	27	18.3671	173.232	27	15.817	143.449	27	16.2893	95.9454	27	18.0552	119.671	27	30.724	140.544	27	9.011	93.3722	27	8	152.81	27
	28	1.898	109.636	28	23.506	211.555	28	15.139	97.8577	28	30.9	118.869	28	9.638	104.443	28	10.5333	143.951	28	6.016	100.334	28	27.078	120.95	28	21	130.539	28	19.2074	175.731	28	15.698	135.853	28	16.7842	90.9926	28	16.2411	124.253	28	30.056	144.139	28	9.9	92.5043	28	7.9457	150.833	28
	29	1.6549	105.993	29	23.622	216.696	29	14.989	100.846	29	31.048	113.996	29	9.5978	108.012	29	10.9974	144.775	29	6.225	97.162	29	27.814	121.179	29	20.7724	134.271	29	18.4399	183.566	29	16.52	136.726	29	17.871	87.6012	29	15.1999	123.394	29	34.533	148.681	29	12.687	96.7331	29	7.0334	152.064	29
	30	1.893	106.459	30	23.763	222.219	30	14.92	97.4279	30	31.345	109.024	30	10.3617	110.665	30	11.3076	145.209	30	5.773	88.849	30	27.883	121.513	30	20.5231	138.621	30	17.3899	187.389	30	17.587	133.496	30	17.0075	94.3862	30	14.0071	121.157	30	35.177	157.083	30	10.333	98.4212	30	7.6726	153.677	30
	31	1.1558	106.825	31	24.006	218.467	31	14.587	93.7712	31	34.136	106.752	31	10.9957	114.998	31	12.3394	150.184	31	6	83.34	31	28.216	119.223	31	21.7161	145.421	31	17.6711	183.854	31	16.376	134.81	31	17.6532	100.779	31	15.18	119.011	31	41.362	159.102	31	11.136	97.0342	31	8.9696	153.908	31
	32	2	107.451	32	24.527	208.907	32	14.664	94.8107	32	33.892	105.755	32	10.4375	117.28	32	12.6797	153.075	32	5.39	80.39	32	30.823	125.143	32	21.9691	150.398	32	17.863	189.257	32	17.265	131.102	32	16.8019	105.701	32	15.2298	115.523	32	40.294	158.45	32	13.771	93.3291	32	9	158.08	32
	33	2	108.7	33	25.459	201.891	33	16.841	92.5294	33	32.644	105.004	33	10.431	120.411	33	14.0384	153.869	33	5.61	75.12	33	33.896	129.863	33	20.8874	153.352	33	17.9987	193.731	33	18.772	132.378	33	17.2731	108.866	33	14.8858	111.449	33	41.608	154.646	33	14.004	88.9841	33	9.6369	165.068	33
	34	1.9644	108.897	34	26.995	195.343	34	15.124	93.0911	34	32.525	104.671	34	10.0105	119.964	34	14.8667	148.691	34	5.39	65.29	34	35.199	129.471	34	21.4257	157.098	34	17.0928	192.023	34	19	133.677	34	16.3811	108.941	34	14.691	108.253	34	36.819	154.227	34	15.548	87.7921	34	11.71	164.082	34
	35	1.3027	107.775	35	26.521	190.509	35	17.524	93.5938	35	32.134	102.647	35	11.3638	118.909	35	16.145	146.728	35	5	59.17	35	38.861	130.262	35	20.2858	159.409	35	18.0953	189.253	35	19.224	135.595	35	15.6027	107.727	35	13.4136	104.746	35	36.278	154.85	35	16.854	88.1215	35	13.2696	162.883	35
	36	1.1494	110.201	36	25.777	192.03	36	18.509	99.1307	36	29.665	102.377	36	11.3157	117.418	36	17.6113	142.64	36	5.61	54.95	36	42.295	132.268	36	20.6622	160.416	36	17.0949	188.15	36	20.721	135.999	36	15.3082	106.283	36	14.5551	100.369	36	37.111	150.651	36	15.063	87.0286	36	12.2752	163.688	36
	37	2	108.045	37	27.13	195.694	37	18.48	104.828	37	28.72	102.122	37	11.227	117.111	37	19.722	143.263	37	6	54.83	37	49.817	137.45	37	20.2731	157.251	37	17.9865	191.944	37	25.214	135.304	37	15.1437	114.38	37	13.0037	101.143	37	35.997	147.222	37	14.086	82.7286	37	13.1498	161.353	37
	38	2	104.249	38	29.347	193.073	38	19.419	107.783	38	31.205	99.5668	38	10.5848	117.911	38	20.8871	140.14	38	6	55.39	38	63.101	140.335	38	20.8692	155.946	38	19.5317	187.205	38	28.461	135.842	38	16.2861	120.823	38	11.6614	99.7498	38	36.57	137.708	38	12.749	80.3856	38	10.8422	158.177	38
	39	2	103.334	39	28.795	187.566	39	22.258	111.534	39	27.8	96.8168	39	11.2652	117.022	39	23.8369	137.111	39	6	54.39	39	81.339	135.138	39	19.4195	157.872	39	20.4938	183.525	39	34.48	134.901	39	18.2126	124.619	39	12.16	106.491	39	42.535	141.715	39	12.052	80.2362	39	11.4129	152.783	39
	40	2	106.756	40	30.71	185.657	40	24.369	114.066	40	29.016	98.0267	40	10.9705	123.566	40	25.6632	132.274	40	6	52.17	40	100.462	126.374	40	20.3371	155.807	40	19.9887	182.6	40	41.901	129.916	40	17.9921	122.611	40	13.1066	113.532	40	45.136	133.835	40	12.314	78.4074	40	11.1938	151.912	40
	41	2	104.374	41	33.551	182.396	41	29.034	112.794	41	30.06	105.506	41	10.2584	128.026	41	26.7143	126.777	41	5.39	53.44	41	102.401	128.728	41	20.3412	151.42	41	19.5751	181.447	41	55.52	126.683	41	19.7852	117.229	41	12.9054	114.359	41	44.331	132.993	41	12.106	80.5915	41	10.9734	150.455	41
	42	2	104.973	42	37.239	180.331	42	35.543	109.747	42	28.661	110.786	42	10.3872	140.156	42	30.6204	122.529	42	5.61	55	42	94.503	122.519	42	20.7584	155.193	42	18.8473	179.976	42	73.129	126.659	42	21.5292	108.506	42	13.0654	116.548	42	43.128	130.369	42	12.036	91.2488	42	9.4825	148.558	42
	43	2	104.814	43	43.972	179.445	43	41.149	104.228	43	32.993	109.971	43	10.3687	152.531	43	34.8754	119.065	43	5.39	56.22	43	92.357	112.789	43	20.3645	156.106	43	18.617	177.619	43	85.667	124.95	43	25.012	104.932	43	14.0775	116.254	43	40.635	129.799	43	10.795	98.4389	43	9.6971	149.037	43
	44	2	100.534	44	49.284	185.416	44	47.828	96.6219	44	31.73	112.799	44	10.8625	160.663	44	36.1656	117.188	44	5.61	56.39	44	90.632	106.373	44	20.4547	152.943	44	17.5416	175.303	44	100.773	123.253	44	26.9321	109.915	44	15.7821	112.282	44	41.853	138.698	44	11.968	103.643	44	9.603	152.398	44
	45	2.4759	98.7878	45	55.738	190.64	45	58.248	88.5593	45	32.259	108.522	45	11.5225	170.3	45	32.313	110.397	45	6	60.88	45	109.671	98.818	45	19.4182	153.883	45	17.164	176.086	45	106.377	122.806	45	27.8738	112.945	45	16.2235	106.098	45	39.912	146.375	45	11.637	112.305	45	9.2959	155.272	45
	46	2.0986	95.2691	46	69.671	192.082	46	64.146	74.2135	46	36.065	109.776	46	11.9839	174.732	46	31.4097	106.363	46	5.39	66.44	46	144.879	96.702	46	20	148.933	46	16.0895	173.806	46	108.625	119.804	46	33.405	119.419	46	17.5086	102.151	46	38.68	148.541	46	11.285	113.451	46	9.052	158.467	46
	47	2.8467	94.2166	47	95.578	185.612	47	75.799	67.6766	47	37.189	113.486	47	12.6074	173.445	47	32.1245	95.8	47	5	72.88	47	193.964	97.811	47	20.1765	143.335	47	16.2749	165.21	47	109.2	119.709	47	35.819	122.724	47	17.2891	99.2598	47	38.724	154.384	47	14.025	123.949	47	9.3876	156.424	47
	48	2.9841	91.7904	48	117.293	175.696	48	86.84	62.5318	48	39.727	118.073	48	14.2106	166.294	48	34.3665	86.5988	48	5.61	76.61	48	229.786	98.4	48	20.2228	141.873	48	17.9517	159.361	48	107.443	119.673	48	41.6786	123.19	48	16.1322	100.915	48	37.848	155.408	48	14.941	121.105	48	9.5114	156.656	48
	49	3	93.0063	49	117.93	168.747	49	95.594	58.5839	49	44.983	124.434	49	16.0924	162.367	49	36.7754	81.2641	49	6	77	49	242.937	102.139	49	19.3162	140.048	49	18.0327	156.162	49	100.505	117.497	49	46.2276	114.669	49	15.7479	101.76	49	37.978	155.786	49	18.1	116.702	49	9.9063	156.266	49
	50	3.7953	94.441	50	103.509	169.064	50	100.522	61.8159	50	49.513	133.608	50	17.495	154.994	50	38.4395	76.8991	50	6.61	73.34	50	210.706	105.064	50	20.1129	139.729	50	18.6022	153.925	50	91.339	116.225	50	51.4429	111.064	50	17.3569	97.4223	50	37.661	160.197	50	19.918	112.626	50	10.5268	151.305	50
	51	4	98.9561	51	90.418	168.955	51	108.95	70.5224	51	55.316	142.237	51	18.5568	153.029	51	39.2321	73.9163	51	6.39	69.17	51	156.118	110.378	51	20.8089	136.809	51	19.8085	153.523	51	83.546	116.856	51	62.7984	105.898	51	19.5338	93.6558	51	41.953	163.501	51	19.618	111.628	51	10.383	150.802	51
	52	5.3929	105.394	52	86.972	165.471	52	118.143	79.9537	52	61.381	143.923	52	19.5004	148.938	52	39.5738	74.1618	52	6.61	66.78	52	104.119	114.388	52	20.2721	139.796	52	20	152.74	52	79.883	119.345	52	73.2722	98.6841	52	22.2565	91.7539	52	42.8	163.422	52	20.084	109.099	52	10.2127	153.848	52
	53	6.0216	109.586	53	92.283	163.219	53	120.251	87.7453	53	77.574	145.487	53	21.0842	148.519	53	40.6981	77.673	53	6.39	63.56	53	71.481	119.175	53	22.0438	138.629	53	20.26	150.48	53	79.313	115.512	53	84.9382	90.6331	53	23.5645	91.3782	53	46.922	163.765	53	19.999	104.986	53	11.2737	156.771	53
	54	8.1402	110.954	54	99.694	162.894	54	111.429	97.0862	54	97.58	141.297	54	25.1866	144.771	54	41.2727	80.673	54	5.39	63.22	54	53.13	123.309	54	22.1796	139.882	54	22.78	145.96	54	79.638	115.776	54	84.9533	84.6748	54	23.706	102.925	54	46.114	171.565	54	18.056	104.638	54	12.761	161.603	54
	55	11.6614	113.051	55	125.815	165.528	55	99.25	106.384	55	123.066	133.643	55	27.1303	142.713	55	43.2121	85.095	55	5.61	58.51	55	39.477	131.001	55	23.1782	136.87	55	28.52	138.74	55	82.091	115.57	55	82.7325	81.8425	55	20.5354	106.313	55	46.6	171.817	55	17.757	111.275	55	14.3575	162.099	55
	56	15.8334	113.132	56	168.385	168.759	56	91.688	110.648	56	140.112	127.094	56	31.1107	136.104	56	45.9765	91.2066	56	6	56.22	56	33.534	127.083	56	24.1392	131.938	56	33.56	137	56	92.824	119.286	56	83.51	76.9903	56	19.1924	120.744	56	48.43	168.894	56	19.217	115.03	56	15.3585	163.371	56
	57	18.0938	109.542	57	198.902	169.042	57	81.955	112.128	57	149.643	120.726	57	36.7588	125.56	57	53.1309	95.6113	57	6.61	55.78	57	31.581	126.092	57	24.5577	124.573	57	44.91	137.39	57	89.398	112.886	57	90.4231	74.2634	57	20.8382	137.965	57	49.789	165.392	57	20.219	113.873	57	17.6485	167.309	57
	58	17.7234	107.916	58	196.21	173.693	58	74.548	111.592	58	137.425	112.602	58	39.5799	113.907	58	54.2927	101.901	58	6.39	56.83	58	29.919	126.734	58	25.8212	123.092	58	52.04	139.61	58	78.696	120.23	58	92.8054	70.5269	58	20.33	143.964	58	55.181	166.998	58	20.703	113.439	58	21.771	167.227	58
	59	20.5006	106.808	59	162.613	177.888	59	71.485	113.111	59	118.536	105.214	59	42.4802	99.202	59	48.753	111.368	59	6	61.05	59	28.192	122.359	59	28.5578	116.396	59	60.43	137.78	59	64.76	128.398	59	85.2824	70.0823	59	20.2982	149.678	59	62.843	171.158	59	26.596	116.804	59	28.06	170.012	59
	60	20.5069	105.098	60	123.181	176.51	60	72.735	108.825	60	109.185	98.9834	60	46.637	89.321	60	43.5153	118.554	60	6.61	66.66	60	26.805	132.522	60	32.0727	115.239	60	72.21	144.3	60	52.457	126.877	60	79.4826	71.9172	60	18.4579	149.757	60	63.186	172.652	60	28.091	122.143	60	33.7501	176.362	60
	61	18.7904	105.473	61	109.48	175.247	61	65.684	99.2366	61	102.212	93.3847	61	53.3155	83.363	61	44.0031	121.001	61	5.78	72.66	61	25.565	133.751	61	32.8877	113.049	61	89.21	154.04	61	42.727	129.683	61	69.3228	75.5221	61	16.4747	146.35	61	71.632	173.115	61	32.541	124.212	61	41.9306	177.029	61
	62	14.7352	109.052	62	110.89	168.634	62	59.439	92.9759	62	85.042	86.1926	62	57.3013	75.626	62	49.0826	121.985	62	6.22	75.61	62	27.403	139.819	62	36.7096	115.01	62	104.91	161.26	62	35.222	136.613	62	60.7121	77.3868	62	18.1951	134.51	62	78.79	165.236	62	36.995	122.71	62	50.9244	176.689	62
	63	12.7823	108.121	63	103.377	155.037	63	55.072	86.8893	63	72.958	82.2493	63	61.2129	70.614	63	47.119	113.988	63	7	79.05	63	33.977	137.633	63	40.8561	115.388	63	110.22	163.65	63	29.222	139.039	63	51.2832	81.1834	63	17.1754	122.205	63	82.99	154.664	63	41.8	118.895	63	56.7673	176.529	63
	64	9.7001	109.784	64	101.288	139.56	64	50.089	87.0247	64	65.006	78.4331	64	62.3944	70.277	64	41.903	108.676	64	7	79.791	64	40.74	136.034	64	38.8104	115.926	64	101.88	168.78	64	23.476	141.201	64	47.3603	82.1142	64	18.4279	111.189	64	87.102	145.206	64	48.781	111.039	64	61.9563	175.857	64
	65	8.3294	111.686	65	114.195	126.236	65	50.889	90.387	65	57.765	75.6935	65	66.9459	67.497	65	31.5978	100.151	65	7	75.698	65	45.926	136.932	65	46.3879	115.251	65	77.75	173.87	65	20.015	148.932	65	45.4833	86.0339	65	16.9786	101.781	65	92.141	140.072	65	59.619	105.707	65	64.2537	168.096	65
	66	7.7536	112.349	66	129.552	120.125	66	55.119	89.2247	66	56.377	73.0873	66	73.7442	68.506	66	27.5408	101.735	66	6.469	69.225	66	44.621	132.819	66	62.0143	109.308	66	54.31	175.34	66	15.245	154.845	66	43.8478	89.4686	66	19.2303	95.5797	66	93.993	136.175	66	76.521	99.6688	66	68.9354	156.095	66
	67	7.5208	113.286	67	121.923	119.576	67	61.599	92.8186	67	51.238	74.6121	67	77.7281	70.696	67	23.7139	107.01	67	6.527	62.549	67	35.751	133.688	67	76.6782	110.331	67	41.57	190.48	67	13.598	152.459	67	41.7092	93.5974	67	20.6611	93.1259	67	108.722	130.32	67	95.304	93.2305	67	70.3593	148.444	67
	68	5.4772	114.999	68	100.222	124.134	68	59.392	95.6057	68	47.63	74.8929	68	74.7028	69.041	68	19.2808	114.572	68	6.818	59.674	68	29.603	132.282	68	83.078	107.403	68	31.09	186.74	68	13	153.671	68	33.5352	89.5771	68	24.462	94.7341	68	110.475	122.32	68	108	90	68	72.3571	139.994	68
	69	4.1373	115.751	69	83.048	128.12	69	64.362	101.269	69	46.256	74.6819	69	71.592	69.478	69	15.6834	123.632	69	6.478	55.947	69	27.186	132.522	69	81.0756	103.853	69	24.48	183.44	69	12.153	149.088	69	30.9329	84.713	69	29.4825	95.2371	69	138.13	119.074	69	121.28	85.0043	69	73.6023	137.626	69
	70	3.3166	113.098	70	78.865	135.741	70	72.584	112.465	70	39.177	73.844	70	69.8265	72.398				70	6.888	51.893	70	24.406	130.737	70	68.3067	107.148	70	20.74	170.79	70	10.715	142.783	70	31.5921	77.8931	70	37.6116	94.8907	70	167.338	115.578	70	136.89	81.2563	70	72.6191	133.089	70
	71	3.1656	110.172	71	80.074	142.216	71	73.489	117.767	71	35.64	77.9056	71	68.3202	78.235				71	6.633	50.732	71	20.995	128.224	71	51.2269	97.413	71	18.907	154.864				71	25.9178	75.952	71	45.2472	101.115	71	196.587	107.804	71	161.56	75.1411	71	74.244	124.972	71
	72	3.4842	106.928	72	77.824	146.012	72	62.121	124.253	72	35.978	81.9729	72	67.79	87.687				72	6	50.816	72	19.059	132.665	72	41.5755	101.763	72	18.7946	145.769				72	24.9598	78.9257	72	51.7608	107.062	72	198.163	107.221	72	179.604	74.3359	72	76.5396	119.227	72
	73	2.9526	104.64	73	75.844	147.099	73	45.271	122.511	73	31.308	84.2718	73	68.7513	94.703				73	6.144	49.378	73	18.527	142.399	73	40.9305	99.659	73	17.5421	136.401				73	21.4863	81.2518	73	63.2036	113.886	73	186.306	101.22	73	179.085	71.4293	73	78.7648	113.297	73
	74	2.1544	104.847	74	72.435	143.213	74	31.261	120.165	74	30.83	84.3827	74	66.2942	98.531				74	6.945	47.735	74	17.924	146.754	74	39.1738	102.143	74	17.4515	128.674				74	23.6733	87.2544	74	72.7893	127.468	74	172.638	98.0566	74	168.803	74.2363	74	83.4467	110.583	74
	75	2.551	106.024	75	63.942	140.897	75	24.971	117.238	75	28.022	86.9464	75	57.8267	107.281				75	7.545	46.232	75	16.478	151.728	75	41.8947	105.639	75	17.33	122.607				75	21.1563	94.5237	75	75.6296	131.57	75	169.007	94.0779	75	153.093	79.3851	75	79.8626	115.1	75
	76	2.6358	104.372	76	53.616	142.95				76	28.269	85.0602	76	47.9762	109.672				76	6	47.327	76	17.779	152.939	76	46.2667	107.566	76	18.2993	117.32				76	19.0688	93.9941	76	74.2725	135.551	76	194.827	89.9507	76	144.062	83.9668	76	74.0095	118.076	76
	77	2.533	101.005	77	50.116	136.897				77	27.987	85.996	77	40.7003	113.309				77	6	49.154	77	15.898	154.438	77	48.7642	112.381	77	19.1192	112.209				77	19.086	90.4704	77	71.4478	142.739	77	231.636	89.9251	77	142.018	93.3025	77	68.7061	119.853	77
	78	2.3702	100.002	78	44.925	141.076				78	35.835	84.5447	78	34.4922	117.443				78	6	51.777	78	15.725	161.028	78	50.0017	117.062	78	19.089	108.554				78	17.3675	89.1423	78	67.5113	141.498	78	245.752	87.3682	78	139.278	98.0454	78	64.0526	120.383	78
	79	3	101.647	79	40.959	135.77				79	31.763	88.1526	79	33.1977	117.962				79	5.914	49.99	79	16.235	171.26	79	53.3668	119.555	79	20.3748	105.671				79	19.5595	80.5834	79	64.7439	139.357	79	236.777	88.9257	79	129.636	101.053	79	55.8019	123.308	79
	80	3	104.308	80	40.121	132.346				80	26.448	91.3954	80	30.9386	112.113				80	5.052	52.262	80	18.273	180.34	80	53.8442	122.683	80	18.2784	100.562				80	16.9844	79.3688	80	67.0082	136.082	80	210.616	89.5895	80	106.744	97.0416	80	47.7781	128.027	80
	81	3.7719	112.7	81	40.136	135.023				81	26.569	96.2245	81	29.2214	109.331				81	6.021	49.951	81	19.669	187.699	81	48.5112	125.987	81	17.2306	98.4571				81	15.1242	77.3397	81	66.1987	136.799	81	173.679	91.0532	81	91.914	98.198	81	43.2151	130.432	81
	82	4	117.68	82	41.044	137.431				82	26.446	101.049	82	26.6656	107.031				82	7.624	46.581	82	20.735	202.897	82	41.3805	133.232	82	15.6124	98.1178				82	17.5741	76.9203	82	62.7135	142.988	82	133.958	92.127	82	77.34	93.8839	82	41.2372	136.405	82
	83	4.8171	121.307	83	41.964	142.659				83	23.175	107.819	83	25.9496	108.474				83	6.878	44.874	83	22	215.042	83	35.0683	138.266							83	14.6768	82.0441	83	60.6516	132.416	83	113.948	97.31	83	66.146	99.6773	83	37.7652	141.78	83
	84	4.8939	126.309	84	37.064	141.922				84	22.835	111.034	84	23.8011	111.87				84	6.026	43.398	84	22	223.566	84	33.7881	145.861							84	15.0699	89.5151	84	57.5529	120.182	84	103.449	99.2754	84	52.853	103.939	84	34.2002	145.797	84
				85	31.959	148.981				85	22.971	108.196	85	22.9233	115.299				85	5.649	44.919	85	17.697	232.923	85	32.0381	147.503							85	15.8864	97.6564	85	57.3631	111.001	85	96.31	97.7049	85	46.794	100.51	85	31.0871	148.831	85
				86	30.015	153.316							86	21.9415	116.688				86	6.709	47.183	86	16.501	214.888	86	26.5662	157.983							86	16.4321	106.566	86	63.2761	102.897	86	95.278	99.3121	86	35.921	93.126	86	30.8313	152.899	86
				87	24.709	162.392							87	21.9891	118.743				87	6.142	48.919	87	15.577	202.955	87	24.7702	166.248							87	15.8798	111.488	87	68.1006	95.6368	87	91.325	102.497	87	29.934	93.3977	87	29.714	154.137	87
				88	24.013	169.606							88	22.7389	114.872				88	5.221	52.284	88	15.323	189.687	88	21.293	174.063							88	15.777	111.346	88	70.6907	93.5341	88	96.472	106.625	88	25.735	86.4519	88	26.4935	150.698	88
				89	20.787	177.233													89	6.221	53.207	89	14.553	183.524	89	18.1487	188.37							89	15.3373	106.368	89	73.7133	86.8058	89	108.423	110.255	89	23.174	76.8084	89	21.4084	148.658	89
				90	19.991	176.923													90	5.622	53.651	90	13.557	174.135	90	18.7575	200.616							90	15.9072	97.8791	90	72.6248	84.9967	90	126.93	113.026	90	20.957	79.8492	90	18.6083	150.599	90
				91	18.268	180.256													91	5.106	56.344				91	17.2172	214.344							91	16.6643	95.4527	91	70.9387	85.4212	91	139.291	119.23	91	21.041	76.2039	91	18.5131	151.334	91
																			92	6.166	58.315				92	16.1803	223.65							92	17.1369	100.546	92	71.1001	83.3675	92	145.86	120.148	92	18.064	78.9385	92	16.9869	153.199	92
																			93	6.325	60.165				93	16.6338	226.371							93	17.1835	107.963	93	70.4345	82.2676	93	146.099	114.557	93	16.04	79	93	16.5289	152.605	93
																			94	7.139	62.443				94	15.2265	229.915										94	73.4704	80.998	94	131.964	108.43	94	18.94	83.9	94	14.959	158.39	94
																			95	9.652	62.903				95	14	225.275										95	81.3556	85.8623	95	111.492	106.505	95	16.06	87.92	95	13.6211	159.397	95
																			96	10.876	63.3				96	13.74	208.967										96	82.8812	79.9874	96	92.428	106.266	96	15.02	93.88	96	12.0248	155.383	96
																			97	12.303	64.048				97	14.6435	196.948										97	85.6684	75.8814	97	82.591	108.224	97	15	81.26	97	11.1783	143.385	97
																			98	12.532	67.46				98	14.5352	193.124										98	80.4956	72.6656	98	77.063	112.643	98	12.06	90.8	98	11.101	130.157	98
																			99	11.423	73.862				99	13.1715	196.926										99	75.5027	71.9692	99	75.188	121.264	99	14.94	90.02	99	9.3282	118.73	99
																			100	8.772	74.596				100	12.7094	203.053										100	67.761	69.6207	100	79.299	127.64	100	15	105.68				100
																			101	7.252	75.16				101	11.8248	205.139										101	61.3982	67.4083	101	78.499	131.742	101	12.06	100.12				101
																			102	7	70.426																102	54.6626	64.5905	102	73.829	137.738	102	12.98	96.08				102
																			103	7.071	66.324																103	47.3375	62.2171	103	67.298	137.919	103	11.04	97.96				103
																			104	7.514	66.179																104	35.3493	66.0674	104	55.764	132.863	104	11	107.8				104
																			105	7.172	68.508																105	27.458	65.0818	105	46.994	123.991	105	9.04	109.96				105
																			106	7.361	73.591																106	18.5102	66.7861	106	40.922	112.052	106	9.98	106.08				106
																			107	9.616	76.043																107	18.3849	66.8671	107	36.206	95.612	107	10	105.02				107
																			108	12.147	74.066																108	17.141	68.7446	108	35.776	80.4497	108	10	106.96				108
																			109	15.135	68.119																109	16.0491	70.1897				109	10	101.12				109
																			110	16.215	61.941																110	16.3973	71.2284				110	9.02	107.86				110
																			111	11.936	55.654																111	14.1243	73.5706				111	9	110.94				111
																			112	9.677	50.438																112	13.9596	72.6717				112	9.98	106.1				112
																			113	7.795	50.914																113	12.5524	70.8875				113	10	98.16				113
																			114	6.337	49.772																114	11.2853	68.0722										114
																			115	7.532	51.087																115	11.0488	66.4843										115
																			116	6.004	52.976																116	12.2208	63.5467										116
																			117	5.801	54.308																117	12.0479	66.3686										117
																			118	6.264	60.104																118	11.1421	71.4404										118
																			119	6.987	59.791																119	11.2495	72.5053										119
																			120	8.866	54.968																120	10.4375	69.4908										120
																			121	7.984	52.998																121	10.2242	63.3023										121
																			122	7.34	53.714																122	10.3716	59.6091										122
																			123	7.001	56.51																												123
																			124	8.614	51.586																												124
																			125	11.275	55.149																												125
																			126	13.625	57.645																												126
																			127	15.027	64.828																												127
																			128	15.412	67.426																												128
																			129	16.649	72.353																												129
																			130	20.246	69.389																												130
																			131	21.522	66.77																												131
																			132	24.911	59.134																												132
																			133	28.366	58.398																												133
																			134	32.428	56.339																												134
																			135	31.481	64.376																												135
																			136	29.166	66.315																												136
																			137	25.539	68.923																												137
																			138	22.814	69.523																												138
																			139	21.708	67.299																												139
																			140	20.342	61.957																												140
																			141	24.346	61.054																												141
																			142	40.546	53.621																												142
																			143	57.183	49.306																												143
																			144	66.823	48.466																												144
																			145	60.375	48.693																												145
																			146	48.838	46.521																												146
																			147	38.549	46.064
																			148	32.273	44.584
																			149	34.108	42.697
																			150	30.943	42.825
																			151	34.2	43.955
																			152	50.501	43.695
																			153	72.18	44.266
																			154	96.324	41.892
																			155	109.319	37.666
																			156	111.086	36.648
																			157	129.87	36.66
																			158	150.989	37.345
																			159	154.801	38.952
																			160	136.601	38.731
																			161	102.82	39.64
																			162	62.988	38.904
																			163	50.897	39.587
																			164	45.591	41.758
																			165	35.602	43.566
																			166	26.593	48.197
																			167	23.924	54.744
																			168	22.638	60.537
																			169	22.482	63.04
																			170	32.137	64.957
																			171	52.294	64.742
																			172	70.98	63.321
																			173	77.915	63.009
																			174	65.814	65.908
																			175	46.272	62.959
																			176	30.442	61.84
																			177	26.208	59.275
																			178	22.594	53.855
																			179	18.388	51.247
																			180	17.462	50.812
																			181	16.044	51.228
																			182	15.063	53.322
																			183	14.648	56.673
																			184	14.304	59.338
																			185	13.098	63.24
																			186	12.206	66.063
																			187	12.441	68.521
																			188	13.244	73.541
																			189	13.299	78.28
																			190	16.61	75.136
																			191	24.948	72.144
																			192	36.597	70.67
																			193	41.104	69.536
																			194	35.482	70.067
																			195	24.547	68.834
																			196	16.341	64.586
																			197	12.839	60.68
																			198	12.007	61.686
																			199	10.016	62.638
																			200	8.499	63.304
																			201	8.112	63.87
																			202	7.752	63.771
																			203	7.002	65.136
																			204	6.004	64.73
																			205	6.322	65.285
																			206	6.498	69.862
																			207	5.456	76.775
																			208	5.124	87.354
																			209	5.669	95.093
																			210	6.674	99.483
																			211	7.065	100.94
																			212	6.319	97.255
																			213	5.542	93.373
																			214	5.031	94.378
																			215	4.756	92.568
																			216	4.454	92.572
																			217	4.203	89.74
																			218	3.84	84.463
																			219	4.212	77.099
																			220	3.638	67.36
																			221	3.325	58.223
[truncated: 38 more columns]

## Sheet: Binned Values
% Chr Length		B12	FISH	IF	B45	FISH	IF	B26	FISH	IF	B06	FISH	IF	B46	FISH	IF	B34	FISH	IF	B10	FISH	IF	B20	FISH	IF	B08	FISH	IF	B28	FISH	IF	B44	FISH	IF	B39	FISH	IF	A23	FISH	IF	B11	FISH	IF	B02	FISH	IF	A2	FISH	IF
		X	Y	Y	X	Y	Y	X	Y	Y	X	Y	Y	X	Y	Y	X	Y	Y	X	Y	Y	X	Y	Y	X	Y	Y	X	Y	Y	X	Y	Y	X	Y	Y	X	Y	Y	X	Y	Y	X	Y	Y	X	Y	Y
0-5		0	20	113	0	25	77	0	17	111	0	13	109	0	25	104	0	18	202	0	8	56	0	22	139	0	42	122	0	14	132	0	25	145	0	11	105	0	18	106	0	7	156	0	43	134	0	21	123
		0.684932	19.478	119.493	0.699301	25	78.6901	0.75188	19.582	111.787	0.819672	13.5651	100.185	0.862069	25	103.448	0.869565	18.496	196.647	0.884956	9.397	56.5586	0.884956	19.674	142.175	0.925926	40.018	121.36	0.925926	15.217	131.024	0.980392	25	141.69	0.990099	10.449	110.744	0.990099	18.6027	103.3	1.0101	7.9285	160.722	1.07527	41.596	135.11	1.0989	22.604	126.543
		1.36986	19.626	123.619	1.3986	25	79.2741	1.50376	19.744	115.183	1.63934	14.6958	100.294	1.72414	25	108.932	1.73913	18.816	190.427	1.76991	11.405	58.5383	1.76991	19.784	150.114	1.85185	36.696	121.447	1.85185	15.229	136.523	1.96078	25	148.319	1.9802	10	114.367	1.9802	18.577	104.769	2.0202	7.3635	162.714	2.15054	32.2202	129.552	2.1978	23.246	126.623
		2.05479	21.179	128.809	2.0979	25	80.4073	2.25564	17.685	117.073	2.45902	14.3752	98.8628	2.58621	25	111.791	2.6087	19.228	177.441	2.65487	12.201	55.0415	2.65487	20.744	151.638	2.77778	33.653	119.976	2.77778	16.652	141.927	2.94118	25	148.871	2.9703	9.777	118.438	2.9703	19.0108	103.103	3.0303	7	157.01	3.22581	26.5962	125.285	3.2967	22.954	128.535
		2.73973	21.727	132.506	2.7972	25	82.1039	3.00752	18.619	120.43	3.27869	14.4426	103.318	3.44828	25	109.641	3.47826	20.634	169.624	3.53982	14.14	55.4811	3.53982	20.287	154.502	3.7037	31.302	123.501	3.7037	16.023	147.321	3.92157	25	150.012	3.9604	9.691	118.895	3.9604	19.6779	106.458	4.0404	7.0206	155.029	4.30108	22.9888	112.43	4.3956	23.66	137.209
		3.42466	22.624	136.556	3.4965	25	82.278	3.7594	18.769	126.158	4.09836	15.5689	102.512	4.31034	25	109.292	4.34783	20.468	166.516	4.42478	14.713	60.0757	4.42478	20.899	156.043	4.62963	30.456	127.718	4.62963	18.358	147.815	4.90196	25	152.59	4.9505	9.331	119.87	4.9505	19.7249	106.297
		4.10959	23.225	136.868	4.1958	25	86.0066	4.51128	18.061	127.233	4.91803	18.5568	103.751
		4.79452	23.869	133.77	4.8951	25	87.9283
Average			21.466	128.078		25	81.711		18.4943	118.409		14.8863	102.56		25	107.851		19.2737	183.776		11.6427	56.9492		20.5647	148.912		35.6875	122.667		15.9132	139.435		25	147.747		10.0413	114.552		18.9322	104.988		7.26252	158.295		33.2802	127.275		22.6928	128.382
5-10		5.47945	22.253	128.004	5.59441	25	88	5.26316	19.094	132.38	5.7377	20.0577	105.714	5.17241	25	110.801	5.21739	21.424	165.506	5.30973	14.084	67.1476	5.30973	19.923	155.075	5.55556	32.669	130.18	5.55556	17.671	150.931	5.88235	25	150.159	5.94059	8.05	120.538	5.94059	19	105.301	5.05051	6.6528	154.378	5.37634	19.2427	107.581	5.49451	22.648	147.665
		6.16438	22.864	120.495	6.29371	25	89.4397	6.01504	21.093	131.472	6.55738	20.3793	97.9254	6.03448	25	112.951	6.08696	22.778	164.075	6.19469	13.394	71.7166	6.19469	19.084	153.332	6.48148	32.514	133.367	6.48148	16.064	149.661	6.86275	25	152.218	6.93069	8.099	118.634	6.93069	19.1063	112.021	6.06061	7.6689	152.401	6.45161	17.8197	101.078	6.59341	22.457	152.337
		6.84932	20.759	114.705	6.99301	25	91.881	6.76692	18.677	131.977	7.37705	20.6327	93.9354	6.89655	25	116.223	6.95652	23.736	158.115	7.07965	12.114	80.2781	7.07965	19	152.32	7.40741	33.251	136.386	7.40741	15.235	148.001	7.84314	25	152.731	7.92079	8.541	119.107	7.92079	19.5044	113.966	7.07071	8.1999	150.803	7.52688	18.0381	104.982	7.69231	23.92	154.252
		7.53425	22.585	106.611	7.69231	25	94.2752	7.5188	19.125	131.291	8.19672	18.5924	94.2567	7.75862	25	120.492	7.82609	23.828	158.695	7.9646	13.116	89.1843	7.9646	20.378	152.464	8.33333	31.061	133.145	8.33333	15.975	144.185	8.82353	25	152.388	8.91089	8.521	119.719	8.91089	19.6562	117.625	8.08081	8.0165	147.889	8.60215	17.2377	109.843	8.79121	24.905	156.639
		8.21918	22.053	106.817	8.39161	25	96.3192	8.27068	20.304	129.672	9.01639	17.5573	96.4172	8.62069	25	122.751	8.69565	22.619	158.437	8.84956	13.061	106.538	8.84956	20.142	157.55	9.25926	30.713	132.545	9.25926	16.953	132.984	9.80392	25	152.374	9.90099	8.195	119.877	9.90099	21.1922	119.278	9.09091	7.7657	148.063	9.67742	17.704	112.628	9.89011	25.016	156.169
		8.90411	20.356	101.97	9.09091	25	94.4815	9.02256	18.195	129.175	9.83607	15.8965	97.5489	9.48276	25	124.551	9.56522	23.978	157.803	9.73451	13.011	109.906	9.73451	20.091	161.032
		9.58904	19.809	101.035	9.79021	25	96.5622	9.77444	16.54	129.753
Average			21.5256	111.377		25	92.9941		19.004	130.817		18.8527	97.6329		25	117.961		23.0605	160.438		13.13	87.4617		19.7697	155.295		32.0416	133.125		16.3796	145.152		25	151.974		8.2812	119.575		19.6918	113.638		7.66076	150.707		18.0084	107.222		23.7892	153.412
10-15		10.274	20.209	104.043	10.4895	25	96.9926	10.5263	16.551	131.311	10.6557	15.5034	96.9651	10.3448	25	127.524	10.4348	25.935	155.475	10.6195	13.472	112.328	10.6195	19.542	166.963	10.1852	32.023	131.202	10.1852	15.591	125.526	10.7843	25	155.109	10.8911	8.061	119.642	10.8911	20.0041	123	10.101	7.9987	146.391	10.7527	17.3832	111.11	10.989	23.395	155.125
		10.9589	17.619	108.665	11.1888	25	96.8398	11.2782	18.008	130.549	11.4754	13.4925	98.6128	11.2069	25	127.37	11.3043	26.771	156.164	11.5044	14.306	116.449	11.5044	21.021	169.497	11.1111	32.736	131.242	11.1111	16.365	118.597	11.7647	25	157.12	11.8812	8.662	123.655	11.8812	19.7301	130.159	11.1111	9.2496	142.824	11.828	18.134	104.145	12.0879	23.737	157.67
		11.6438	18.052	109.741	11.8881	25	97.311	12.0301	18.637	133.407	12.2951	14.0364	93.6901	12.069	25	129.224	12.1739	26.834	154.229	12.3894	13.691	124.393	12.3894	23.121	173.411	12.037	35.977	131.318	12.037	17.965	116.94	12.7451	25	155.223	12.8713	8.154	128.444	12.8713	21.7783	132.852	12.1212	11.1968	141.329	12.9032	19.2349	99.2954	13.1868	24.313	159.916
		12.3288	18.469	113.65	12.5874	25	96.3183	12.782	18.564	136.601	13.1148	15.0254	97.6097	12.931	25	124.086	13.0435	28.336	155.062	13.2743	14.429	129.827	13.2743	21.939	175.968	12.963	35.217	134.2	12.963	15.93	118.248	13.7255	25	156.455	13.8614	8.922	132.746	13.8614	22.8691	131.081	13.1313	13.598	145.528	13.9785	19.5454	99.4926	14.2857	24.697	158.067
		13.0137	16.527	109.463	13.2867	25	94.2389	13.5338	20.952	132.762	13.9344	13.9611	100.249	13.7931	25	119.546	13.913	31.553	154.307	14.1593	13.209	136.441	14.1593	21.491	172.42	13.8889	35.367	135.97	13.8889	18.72	122.741	14.7059	25	162.31	14.8515	10.984	135.777	14.8515	22.4038	134.832	14.1414	13.0011	148.198
		13.6986	18.726	109.849	13.986	25	90.0106	14.2857	18.431	133.059	14.7541	14.1718	100.707	14.6552	25	118.189	14.7826	28.97	156.249							14.8148	35.304	138.747	14.8148	15.757	121.841
		14.3836	19.144	106.149	14.6853	25	87.1961
Average			18.3923	108.794		25	94.1296		18.5238	132.948		14.3651	97.9723		25	124.323		28.0665	155.248		13.8214	123.888		21.4228	171.652		34.4373	133.78		16.7213	120.649		25	157.243		8.9566	128.053		21.3571	130.385		11.0088	144.854		18.5744	103.511		24.0355	157.695
15-20		15.0685	20.258	103.936	15.3846	25	81.7915	15.0376	17.975	130.109	15.5738	14.6289	102.257	15.5172	25	110.835	15.6522	27.076	152.568	15.0442	12.29	138.811	15.0442	22.004	167.956	15.7407	32.323	145.154	15.7407	17.548	125.332	15.6863	25	165.359	15.8416	11.643	135.756	15.8416	23.6271	135.925	15.1515	13.3979	142.212	15.0538	20.9069	101.559	15.3846	23.988	156.09
		15.7534	21.76	104.05	16.0839	25	79.4324	15.7895	18.695	131.881	16.3934	16.0375	108.499	16.3793	25	110.295	16.5217	23.925	151.397	15.9292	12.753	140.738	15.9292	23.03	162.353	16.6667	32.613	152.027	16.6667	16.08	128.734	16.6667	25	166.046	16.8317	13.901	133.924	16.8317	24.5486	136.399	16.1616	12.1527	148.109	16.129	24.4484	104.581	16.4835	23.607	159.087
		16.4384	21.819	109.701	16.7832	25	77.9014	16.5414	18.835	133.722	17.2131	16.341	112.883	17.2414	25	105.96	17.3913	24.551	152.595	16.8142	10.517	129.031	16.8142	24.472	159.207	17.5926	31.672	156.486	17.5926	14.027	127.038	17.6471	25	171.406	17.8218	14.476	133.747	17.8218	24.062	137.214	17.1717	11.7541	152.65	17.2043	25.9822	104.463	17.5824	24.254	165.411
		17.1233	16.976	115.015	17.4825	25	78.1547	17.2932	18.535	134.703	18.0328	16.4368	112.547	18.1034	25	106.443	18.2609	21.729	143.685	17.6991	10.294	125.074	17.6991	25.221	157.144	18.5185	32.022	154.61	18.5185	15.711	131.173	18.6275	25	175.646	18.8119	13.088	130.775	18.8119	25.4315	140.567	18.1818	13.0038	154.937	18.2796	26.489	98.6043	18.6813	22.595	171.661
		17.8082	15.06	114.92	18.1818	25	77.1975	18.0451	19.809	134.517	18.8525	14.937	112.041	18.9655	25	105.157	19.1304	20.975	141.168	18.5841	9.859	114.627	18.5841	25	156.283	19.4444	30.14	148.878	19.4444	14.492	127.693	19.6078	25	176.86	19.802	10.549	133.016	19.802	22.0107	138.274	19.1919	13.8872	154.072	19.3548	24.8859	93.3074	19.7802	23.205	177.634
		18.4932	17.261	112.899	18.8811	25	75.5704	18.797	20.747	131.248	19.6721	14.1865	113.88	19.8276	25	104.046				19.469	9.436	108.703	19.469	25	156.991
		19.1781	15.839	106.417	19.5804	25	75.6256	19.5489	21.165	127.84
		19.863	17.092	103.097	20.2797	25	76.0934
Average			18.2581	108.754		25	77.7209		19.3944	132.003		15.428	110.351		25	107.123		23.6512	148.283		10.8582	126.164		24.1212	159.989		31.754	151.431		15.5716	127.994		25	171.064		12.7314	133.444		23.936	137.676		12.8391	150.396		24.5425	100.503		23.5298	165.977
20-25		20.5479	15.945	97.4196	20.979	25	75.5803	20.3008	18.662	125.757	20.4918	13.2311	110.846	20.6897	25	101.668	20	20.542	139.463	20.354	9.235	103.168	20.354	26.361	159.383	20.3704	30.955	145.615	20.3704	15.723	127.547	20.5882	25	174.885	20.7921	8.391	128.201	20.7921	22.3793	137.426	20.202	12.249	154.238	20.4301	25.6433	88.7964	20.8791	23.841	179.525
		21.2329	15.827	95.9398	21.6783	25	76.2371	21.0526	22.76	126.038	21.3115	14.9339	111.325	21.5517	25	103.035	20.8696	19.137	140.531	21.2389	10.319	99.3267	21.2389	28.056	160.44	21.2963	31.534	144.681	21.2963	13.95	126.623	21.5686	25	175.744	21.7822	8	128.098	21.7822	23.9892	136.998	21.2121	10.7028	154.413	21.5054	27.1427	84.696	21.978	23.897	178.611
		21.9178	14.843	98.3503	22.3776	25	76.2382	21.8045	22.328	128.182	22.1311	18.0552	119.671	22.4138	25	101.556	21.7391	17.72	141.835	22.1239	10.799	95.3034	22.1239	26.842	160.033	22.2222	30.258	142.401	22.2222	14.447	124.927	22.549	25	175.032	22.7723	8.399	129.964	22.7723	23.2787	131.502	22.2222	9.4029	150.246	22.5806	29.406	84.1104	23.0769	23.386	181.261
		22.6027	18.392	103.587	23.0769	25	75.2508	22.5564	19.605	130.308	22.9508	16.2411	124.253	23.2759	25	101.041	22.6087	17.449	145.675	23.0088	9.191	93	23.0088	24.521	161.351	23.1481	29.002	138.233	23.1481	13.663	121.632	23.5294	25	173.274	23.7624	8.977	129.492	23.7624	22.5328	127.435	23.2323	8.1031	150.203	23.6559	28.5388	85.3368	24.1758	23.73	179.135
		23.2877	16.966	104.46	23.7762	25	75.0046	23.3083	21.758	130.202	23.7705	15.1999	123.394	24.1379	25	103.937	23.4783	16.438	148.672	23.8938	9.011	93.3722	23.8938	24.959	157.597	24.0741	30.256	142.843	24.0741	12.978	117.51	24.5098	25	171.848	24.7525	10	130.962	24.7525	23.0016	122.289	24.2424	7.321	152.445	24.7312	27.6775	88.1247
		23.9726	18.058	103.822	24.4755	25	75.7198	24.0602	21.007	130.114	24.5902	14.0071	121.157				24.3478	16.562	150.022	24.7788	9.9	92.5043	24.7788	25.33	151.519
		24.6575	16.151	106.64				24.812	20.255	132.056
Average			16.5974	101.46		25	75.6718		20.9107	128.951		15.278	118.441		25	102.247		17.9747	144.366		9.7425	96.1124		26.0115	158.387		30.401	142.755		14.1522	123.648		25	174.157		8.7534	129.344		23.0363	131.13		9.55576	152.309		27.6817	86.2129		23.7135	179.633
25-30		25.3425	16.102	108.784	25.1748	25	75.8944	25.5639	19.832	138.836	25.4098	15.18	119.011	25	25	102.308	25.2174	17.797	154.601	25.6637	12.687	96.7331	25.6637	25.443	148.454	25	30.724	140.544	25	14.712	110.632	25.4902	25	169.669	25.7426	10.022	132.991	25.7426	22.6059	129.455	25.2525	7.624	151.363	25.8065	21.3249	100.404	25.2747	23.029	181.864
		26.0274	15.275	109.979	25.8741	25	76.0133	26.3158	18.589	137.694	26.2295	15.2298	115.523	25.8621	25	99.3438	26.087	18.782	155.594	26.5487	10.333	98.4212	26.5487	26.017	145.572	25.9259	30.056	144.139	25.9259	13.785	107.079	26.4706	25	168.049	26.7327	10.998	132.888	26.7327	21.7032	129.323	26.2626	7.7044	152.532	26.8817	19.8299	102.448	26.3736	24.223	184.483
		26.7123	14.704	111.898	26.5734	25	74.6228	27.0677	18.909	137.93	27.0492	14.8858	111.449	26.7241	25	96.787	26.9565	20.061	156.731	27.4336	11.136	97.0342	27.4336	25.407	142.647	26.8519	34.533	148.681	26.8519	13.376	105.05	27.451	25	165.992	27.7228	13.084	130.875	27.7228	21	130.539	27.2727	8	152.81	27.957	17.338	101.878	27.4725	23.732	185.472
		27.3973	15.677	115.731	27.2727	25	73.466	27.8195	19.378	141.071	27.8689	14.691	108.253	27.5862	25	94.7581	27.8261	21.058	155.175	28.3186	13.771	93.3291	28.3186	24	143.343	27.7778	35.177	157.083	27.7778	14.378	104.072	28.4314	25	164.019	28.7129	14.588	126.491	28.7129	20.7724	134.271	28.2828	7.9457	150.833	29.0323	16.2893	95.9454	28.5714	23.922	190.977
		28.0822	16.245	119.156	27.972	25	74.6072	28.5714	19.482	139.258	28.6885	13.4136	104.746	28.4483	25	95.8759	28.6957	22.42	152.221	29.2035	14.004	88.9841	29.2035	24.097	144.857	28.7037	41.362	159.102	28.7037	14.099	105.203	29.4118	25	160.215	29.703	14.125	123.672	29.703	20.5231	138.621	29.2929	7.0334	152.064				29.6703	24.551	202.439
		28.7671	15.357	123.467	28.6713	25	73.7886	29.3233	19.661	134.838	29.5082	14.5551	100.369	29.3103	25	97.7051	29.5652	21.475	148.782							29.6296	40.294	158.45	29.6296	13.774	104.121
		29.4521	15.288	118.767	29.3706	18.988	73.304
Average			15.5211	115.397		24.1411	74.528		19.3085	138.271		14.6592	109.892		25	97.7964		20.2655	153.851		12.3862	94.9003		24.9928	144.974		35.3577	151.333		14.0207	106.026		25	165.589		12.5634	129.383		21.3209	132.442		7.6615	151.921		18.6955	100.169		23.8914	189.047
30-35		30.137	16.366	111.528	30.0699	12.393	73.7874	30.0752	21.52	133.429	30.3279	13.0037	101.143	30.1724	25	98.5487	30.4348	22.601	145.571	30.0885	15.548	87.7921	30.0885	24.84	146.682	30.5556	41.608	154.646	30.5556	14.769	105.361	30.3922	25	156.469	30.6931	12.664	124.173	30.6931	21.7161	145.421	30.303	7.6726	153.677	30.1075	16.7842	90.9926	30.7692	23.506	211.555
		30.8219	16.965	104.325	30.7692	10.421	74.186	30.8271	20.466	133.974	31.1475	11.6614	99.7498	31.0345	25	101.043	31.3043	22.643	144.764	30.9735	16.854	88.1215	30.9735	24.3	152.264	31.4815	36.819	154.227	31.4815	13.736	102.003	31.3725	25	153.213	31.6832	11.187	124.564	31.6832	21.9691	150.398	31.3131	8.9696	153.908	31.1828	17.871	87.6012	31.8681	23.622	216.696
		31.5068	19.909	100.744	31.4685	9.884	73.1496	31.5789	20.405	134.43	31.9672	12.16	106.491	31.8966	25	105.786	32.1739	21.38	141.718	31.8584	15.063	87.0286	31.8584	23.907	157.98	32.4074	36.278	154.85	32.4074	15.361	96.9962	32.3529	25	149.126	32.6733	10.279	127.189	32.6733	20.8874	153.352	32.3232	9	158.08	32.2581	17.0075	94.3862	32.967	23.763	222.219
		32.1918	20.99	97.9894	32.1678	9.368	72.4842	32.3308	21.381	133.593	32.7869	13.1066	113.532	32.7586	25	107.927	33.0435	21.526	139.91	32.7434	14.086	82.7286	32.7434	25.611	165.059	33.3333	37.111	150.651	33.3333	15.2	96.2241	33.3333	25	147.845	33.6634	10.991	123.564	33.6634	21.4257	157.098	33.3333	9.6369	165.068	33.3333	17.6532	100.779	34.0659	24.006	218.467
		32.8767	22.436	99.5429	32.8671	9.437	74.6922	33.0827	22.723	133.783	33.6066	12.9054	114.359	33.6207	25	105.788	33.913	21.103	138.627	33.6283	12.749	80.3856	33.6283	25.943	169.604	34.2593	35.997	147.222	34.2593	15.763	92.9369	34.3137	25	145.715	34.6535	10.318	122.058	34.6535	20.2858	159.409	34.3434	11.71	164.082	34.4086	16.8019	105.701
		33.5616	24.122	104.307	33.5664	9.517	76.6034	33.8346	23.064	136.035	34.4262	13.0654	116.548	34.4828	25	104.004	34.7826	21	137.066	34.5133	12.052	80.2362	34.5133	26.727	169.987
		34.2466	26.533	109.559	34.2657	9.481	77.229	34.5865	24.759	137.642
		34.9315	25.411	117.723	34.965	9.363	78.1507
Average			21.5915	105.715		9.983	75.0353		22.0454	134.698		12.6504	108.637		25	103.849		21.7088	141.276		14.392	84.3821		25.2213	160.263		37.5626	152.319		14.9658	98.7044		25	150.473		11.0878	124.31		21.2568	153.136		9.39782	158.963		17.2236	95.8919		23.7243	217.234
35-40		35.6164	23.882	109.102	35.6643	9.686	78.2376	35.3383	26.722	137.452	35.2459	14.0775	116.254	35.3448	25	104.258	35.6522	21.008	134.853	35.3982	12.314	78.4074	35.3982	27.533	170.122	35.1852	36.57	137.708	35.1852	14.829	91.4895	35.2941	25	142.094	35.6436	10.285	123.004	35.6436	20.6622	160.416	35.3535	13.2696	162.883	35.4839	17.2731	108.866	35.1648	24.527	208.907
		36.3014	21.786	105.013	36.3636	9.941	78.7854	36.0902	26.426	139.177	36.0656	15.7821	112.282	36.2069	25	103.861	36.5217	21	129.561	36.2832	12.106	80.5915	36.2832	28.382	167.476	36.1111	42.535	141.715	36.1111	13.951	90.5873	36.2745	25	139.569	36.6337	11.045	123.983	36.6337	20.2731	157.251	36.3636	12.2752	163.688	36.5591	16.3811	108.941	36.2637	25.459	201.891
		36.9863	21.175	102.619	37.0629	9.661	79.7402	36.8421	24.656	140.424	36.8852	16.2235	106.098	37.069	25	102.472	37.3913	20.811	127.396	37.1681	12.036	91.2488	37.1681	30.882	161.347	37.037	45.136	133.835	37.037	15.765	91.1117	37.2549	25	136.863	37.6238	11.539	130.102	37.6238	20.8692	155.946	37.3737	13.1498	161.353	37.6344	15.6027	107.727	37.3626	26.995	195.343
		37.6712	18.322	95.1404	37.7622	10.05	78.9429	37.594	25.418	140.592	37.7049	17.5086	102.151	37.931	25	101.14	38.2609	19.02	128.044	38.0531	10.795	98.4389	38.0531	29.64	157.682	37.963	44.331	132.993	37.963	15.686	90.5353	38.2353	25	135.24	38.6139	12	132.461	38.6139	19.4195	157.872	38.3838	10.8422	158.177	38.7097	15.3082	106.283	38.4615	26.521	190.509
		38.3562	16.868	91.4525	38.4615	10.389	76.7626	38.3459	27.939	142.093	38.5246	17.2891	99.2598	38.7931	25	98.7819	39.1304	19.121	129.363	38.9381	11.968	103.643	38.9381	30.808	153.606	38.8889	43.128	130.369	38.8889	14.753	94.7452	39.2157	25	134.715	39.604	12.25	132.25	39.604	20.3371	155.807	39.3939	11.4129	152.783	39.7849	15.1437	114.38	39.5604	25.777	192.03
		39.0411	17.311	91.3517	39.1608	11.169	75.4173	39.0977	27.954	143.722	39.3443	16.1322	100.915	39.6552	25	96.287				39.823	11.637	112.305	39.823	35.245	150.788	39.8148	40.635	129.799	39.8148	16.055	94.6004
		39.726	18.808	94.559	39.8601	11.954	73.5593	39.8496	28.186	146.757
Average			19.736	98.4624		10.4071	77.3493		26.7573	141.46		16.1688	106.16		25	101.133		20.192	129.843		11.8093	94.1058		30.415	160.17		42.0558	134.403		15.1732	92.1782		25	137.696		11.4238	128.36		20.3122	157.458		12.1899	159.777		15.9418	109.239		25.8558	197.736
40-45		40.411	15.721	91.8257	40.5594	11.352	71.6629	40.6015	29.528	151.958	40.1639	15.7479	101.76	40.5172	25	94.1952	40	19.379	127.891	40.708	11.285	113.451	40.708	39.276	154.871	40.7407	41.853	138.698	40.7407	17.623	98.7916	40.1961	25	136.282	40.5941	12.785	131.649	40.5941	20.3412	151.42	40.404	11.1938	151.912	40.8602	16.2861	120.823	40.6593	27.13	195.694
		41.0959	16.772	99.555	41.2587	11	70.3864	41.3534	30.057	153.842	40.9836	17.3569	97.4223	41.3793	25	94.7521	40.8696	18.674	128.982	41.5929	14.025	123.949	41.5929	45.703	157.563	41.6667	39.912	146.375	41.6667	15.994	99.5324	41.1765	25	133.272	41.5842	13.47	128.615	41.5842	20.7584	155.193	41.4141	10.9734	150.455	41.9355	18.2126	124.619	41.7582	29.347	193.073
		41.7808	14.951	98.8569	41.958	10.959	66.9795	42.1053	31.129	155.881	41.8033	19.5338	93.6558	42.2414	25	96.2625	41.7391	18.531	133.281	42.4779	14.941	121.105	42.4779	53.153	158.103	42.5926	38.68	148.541	42.5926	15.708	98.3075	42.1569	25	132.455	42.5743	14.039	126.469	42.5743	20.3645	156.106	42.4242	9.4825	148.558	43.0108	17.9921	122.611	42.8571	28.795	187.566
		42.4658	17.643	103.859	42.6573	11.374	66.0532	42.8571	29.136	154.033	42.623	22.2565	91.7539	43.1034	33.233	96.5549	42.6087	17.341	128.974	43.3628	18.1	116.702	43.3628	61.754	159.412	43.5185	38.724	154.384	43.5185	16.003	95.7209	43.1373	25	132.027	43.5644	15.13	123.722	43.5644	20.4547	152.943	43.4343	9.6971	149.037	44.086	19.7852	117.229	43.956	30.71	185.657
		43.1507	15.31	106.946	43.3566	11.279	67.3897	43.609	28.961	151.608	43.4426	23.5645	91.3782	43.9655	38.906	99.513	43.4783	16.431	129.696	44.2478	19.918	112.626	44.2478	68.759	155.349	44.4444	37.848	155.408	44.4444	16.688	92.5555	44.1176	25	130.645	44.5545	16.69	122.241	44.5545	19.4182	153.883	44.4444	9.603	152.398
		43.8356	14.467	106.67	44.0559	11.799	67.5513	44.3609	30.119	154.692	44.2623	23.706	102.925	44.8276	33.637	101.791	44.3478	16.879	132.011
		44.5205	14.673	106.932	44.7552	12.654	69.725
Average			15.6481	102.092		11.4881	68.5354		29.8217	153.669		20.3609	96.4825		30.1293	97.1781		17.8725	130.139		15.6538	117.567		53.729	157.06		39.4034	148.681		16.4032	96.9816		25	132.936		14.4228	126.539		20.2674	153.909		10.19	150.472		18.069	121.32		28.9955	190.498
45-50		45.2055	15.219	105.851	45.4545	12.751	72.304	45.1128	31.512	155.094	45.082	20.5354	106.313	45.6897	30.639	103.406	45.2174	16.676	134.063	45.1327	19.618	111.628	45.1327	74.602	154.465	45.3704	37.978	155.786	45.3704	17.353	89.7705	45.098	25	132.947	45.5446	17.644	124.581	45.5446	20	148.933	45.4545	9.2959	155.272	45.1613	21.5292	108.506	45.0549	33.551	182.396
		45.8904	15.521	104.635	46.1538	12.744	74.7349	45.8647	34.035	156.158	45.9016	19.1924	120.744	46.5517	30.115	105.315	46.087	15.24	137.123	46.0177	20.084	109.099	46.0177	74.115	151.093	46.2963	37.661	160.197	46.2963	17.598	88.081	46.0784	25	134.038	46.5347	18.873	127.573	46.5347	20.1765	143.335	46.4646	9.052	158.467	46.2366	25.012	104.932	46.1538	37.239	180.331
		46.5753	17.022	103.3	46.8531	13	75.3339	46.6165	38.226	157.419	46.7213	20.8382	137.965	47.4138	28.905	105.337	46.9565	15.479	135.855	46.9027	19.999	104.986	46.9027	74.925	154.02	47.2222	41.953	163.501	47.2222	17.834	91.9242	47.0588	25	135.417	47.5248	19.024	131.883	47.5248	20.2228	141.873	47.4747	9.3876	156.424	47.3118	26.9321	109.915	47.2527	43.972	179.445
		47.2603	18.245	109.093	47.5524	13.463	74.9922	47.3684	41.333	152.471	47.541	20.33	143.964	48.2759	27.86	104.988	47.8261	14.755	134.289	47.7876	18.056	104.638	47.7876	74.762	161.748	48.1481	42.8	163.422	48.1481	18.767	90.8639	48.0392	25	138.003	48.5149	19.591	135.167	48.5149	19.3162	140.048	48.4848	9.5114	156.656	48.3871	27.8738	112.945	48.3516	49.284	185.416
		47.9452	19.14	112.343	48.2517	14.512	75.2786	48.1203	44.79	151.158	48.3607	20.2982	149.678	49.1379	27.361	104.142	48.6957	14.943	131.847	48.6726	17.757	111.275	48.6726	74.005	167.426	49.0741	46.922	163.765	49.0741	18.641	93.2065	49.0196	25	138.575	49.505	20.791	137.67	49.505	20.1129	139.729	49.4949	9.9063	156.266	49.4624	33.405	119.419	49.4505	55.738	190.64
		48.6301	23.103	119.461	48.951	16.201	74.7848	48.8722	49.31	151.259	49.1803	18.4579	149.757				49.5652	14.497	128.091	49.5575	19.217	115.03	49.5575	69.706	169.798
		49.3151	33.153	118.567	49.6503	17.613	74.1837	49.6241	53.406	151.648
Average			20.2004	110.464		14.3263	74.516		41.8017	153.601		19.942	134.737		28.976	104.638		15.265	133.545		19.1218	109.443		73.6858	159.758		41.4628	161.334		18.0386	90.7692		25	135.796		19.1846	131.375		19.9657	142.784		9.43064	156.617		26.9504	111.143		43.9568	183.646
50-55		50	48.113	118.387	50.3497	20.162	71.4362	50.3759	58.298	149.476	50	16.4747	146.35	50	27.949	103.614	50.4348	14.104	126.606	50.4425	20.219	113.873	50.4425	69.318	167.291	50	46.114	171.565	50	18.528	96.5414	50	25	143.731	50.495	22.007	140.384	50.495	20.8089	136.809	50.5051	10.5268	151.305	50.5376	35.819	122.724	50.5495	69.671	192.082
		50.6849	62.954	116.568	51.049	22.491	70.997	51.1278	67.39	148.409	50.8197	18.1951	134.51	50.8621	29.497	104	51.3043	13.971	129.186	51.3274	20.703	113.439	51.3274	71.142	164.78	50.9259	46.6	171.817	50.9259	18.769	97.3176	50.9804	25	142.005	51.4851	23.664	143.56	51.4851	20.2721	139.796	51.5152	10.383	150.802	51.6129	41.6786	123.19	51.6484	95.578	185.612
		51.3699	69.31	108.89	51.7483	29.599	70.3252	51.8797	78.106	145.26	51.6393	17.1754	122.205	51.7241	31.061	105.625	52.1739	14.575	133.488	52.2124	26.596	116.804	52.2124	73.189	157.774	51.8519	48.43	168.894	51.8519	20.717	97.9707	51.9608	23.328	138.987	52.4752	23.781	146.295	52.4752	22.0438	138.629	52.5253	10.2127	153.848	52.6882	46.2276	114.669	52.7473	117.293	175.696
		52.0548	65.451	108.023	52.4476	40.21	70.059	52.6316	82.782	139.265	52.459	18.4279	111.189	52.5862	33.531	105.21	53.0435	14.965	139.201	53.0973	28.091	122.143	53.0973	75.527	150.851	52.7778	49.789	165.392	52.7778	18.904	92.9626	52.9412	15.701	139.035	53.4653	26.229	152.349	53.4653	22.1796	139.882	53.5354	11.2737	156.771	53.7634	51.4429	111.064	53.8462	117.93	168.747
		52.7397	54.464	102.939	53.1469	43.72	68.9232	53.3835	89.662	135.051	53.2787	16.9786	101.781	53.4483	37.399	104.904	53.913	15.537	142.624	53.9823	32.541	124.212	53.9823	78.76	144.459	53.7037	55.181	166.998	53.7037	19.697	89.0209	53.9216	14.708	139.799	54.4554	27.535	152.21	54.4554	23.1782	136.87	54.5455	12.761	161.603	54.8387	62.7984	105.898	54.9451	103.509	169.064
		53.4247	37.184	102.892	53.8462	46.207	66.8089	54.1353	94.586	129.903	54.0984	19.2303	95.5797	54.3103	43.409	107.091	54.7826	16.195	147.197	54.8673	36.995	122.71	54.8673	92.161	137.685	54.6296	62.843	171.158	54.6296	21.07	84.9525	54.902	13.542	142.914
		54.1096	25.123	110.06	54.5455	43.997	67.3197	54.8872	105.544	128.436	54.918	20.6611	93.1259
		54.7945	20.711	124.517
Average			47.9138	111.534		35.198	69.4099		82.3383	139.4		18.1633	114.963		33.8077	105.074		14.8912	136.384		27.5242	118.863		76.6828	153.807		51.4928	169.304		19.6142	93.1276		19.5465	141.078		24.6432	146.96		21.6965	138.397		11.0314	154.866		47.5933	115.509		100.796	178.24
55-60		55.4795	20.661	133.758	55.2448	46.708	66.035	55.6391	116.807	128.558	55.7377	24.462	94.7341	55.1724	50.227	105.907	55.6522	17.022	150.286	55.7522	41.8	118.895	55.7522	108.75	133.917	55.5556	63.186	172.652	55.5556	21.829	82.9841	55.8824	12.884	147.114	55.4455	29.984	154.413	55.4455	24.1392	131.938	55.5556	14.3575	162.099	55.914	73.2722	98.6841	56.044	90.418	168.955
		56.1644	21.659	133.414	55.9441	60.093	65.4927	56.391	138.755	127.728	56.5574	29.4825	95.2371	56.0345	59.823	104.523	56.5217	17.747	145.471	56.6372	48.781	111.039	56.6372	127.757	129.974	56.4815	71.632	173.115	56.4815	22.502	80.22	56.8627	11.817	148.459	56.4356	33.373	155.454	56.4356	24.5577	124.573	56.5657	15.3585	163.371	56.9892	84.9382	90.6331	57.1429	86.972	165.471
		56.8493	21.172	139.709	56.6434	72.212	65.9479	57.1429	149.682	128.508	57.377	37.6116	94.8907	56.8966	76.233	101.574	57.3913	18	142.136	57.5221	59.619	105.707	57.5221	139.527	126.228	57.4074	78.79	165.236	57.4074	23.811	77.2832	57.8431	10.407	150.995	57.4257	36.627	158.011	57.4257	25.8212	123.092	57.5758	17.6485	167.309	58.0645	84.9533	84.6748	58.2418	92.283	163.219
		57.5342	22.398	128.367	57.3427	75.816	67.5986	57.8947	165.248	132.221	58.1967	45.2472	101.115	57.7586	98.181	96.6092	58.2609	18.53	138.916	58.4071	76.521	99.6688	58.4071	148.116	123.255	58.3333	82.99	154.664	58.3333	22.69	78.6796	58.8235	11.033	152.761	58.4158	40.399	158.766	58.4158	28.5578	116.396	58.5859	21.771	167.227	59.1398	82.7325	81.8425	59.3407	99.694	162.894
		58.2192	25.547	129.442	58.042	71.036	69.6506	58.6466	172.929	133.296	59.0164	51.7608	107.062	58.6207	123.835	93.7274	59.1304	19.908	135.324	59.292	95.304	93.2305	59.292	146.035	122.633	59.2593	87.102	145.206	59.2593	24.487	76.7247	59.8039	11.389	156.45	59.4059	43.764	162.958	59.4059	32.0727	115.239	59.596	28.06	170.012
		58.9041	27.776	122.23	58.7413	63.04	70.215	59.3985	176.159	137.938	59.8361	63.2036	113.886	59.4828	144.69	91.3509
		59.589	28.752	118.861	59.4406	55.08	68.6849
Average			23.995	129.397		63.4264	67.6607		153.263	131.375		41.9613	101.154		92.1648	98.9487		18.2414	142.427		64.405	105.708		134.037	127.201		76.74	162.175		23.0638	79.1783		11.506	151.156		36.8294	157.92		27.0297	122.248		19.4391	166.004		81.4741	88.9586		92.3418	165.135
60-65		60.274	27.486	112.897	60.1399	53.081	69.6476	60.1504	161.765	141.082	60.6557	72.7893	127.468	60.3448	153.868	88.4975	60	20.905	136.213	60.177	108	90	60.177	149.516	119.333	60.1852	92.141	140.072	60.1852	27	75.3851	60.7843	12.933	156.483	60.396	48.81	164.624	60.396	32.8877	113.049	60.6061	33.7501	176.362	60.2151	83.51	76.9903	60.4396	125.815	165.528
		60.9589	27.761	110.321	60.8392	60.264	68.93	60.9023	138.298	144.303	61.4754	75.6296	131.57	61.2069	156.062	88.1368	60.8696	21.434	140.934	61.0619	121.28	85.0043	61.0619	160.33	114.383	61.1111	93.993	136.175	61.1111	27	75.5481	61.7647	11.045	156.08	61.3861	55.327	164.521	61.3861	36.7096	115.01	61.6162	41.9306	177.029	61.2903	90.4231	74.2634	61.5385	168.385	168.759
		61.6438	26.288	105.307	61.5385	72.498	69.4822	61.6541	113.335	145.36	62.2951	74.2725	135.551	62.069	157.291	89.1003	61.7391	23.575	143.991	61.9469	136.89	81.2563	61.9469	178.084	114.527	62.037	108.722	130.32	62.037	29.338	76.1385	62.7451	12.998	157.932	62.3762	62.399	157.707	62.3762	40.8561	115.388	62.6263	50.9244	176.689	62.3656	92.8054	70.5269	62.6374	198.902	169.042
		62.3288	28.167	109.709	62.2378	89.031	69.1404	62.406	95.932	147.864	63.1148	71.4478	142.739	62.931	159.276	88.3846	62.6087	24.438	147.83	62.8319	161.56	75.1411	62.8319	199.093	114.272	62.963	110.475	122.32	62.963	29.299	74.9362	63.7255	13.212	161.002	63.3663	74.687	154.901	63.3663	38.8104	115.926	63.6364	56.7673	176.529	63.4409	85.2824	70.0823	63.7363	196.21	173.693
		63.0137	29.558	110.715	62.9371	93.585	66.4399	63.1579	87.389	145.301	63.9344	67.5113	141.498	63.7931	165.005	88.9894	63.4783	25.849	151.275	63.7168	179.604	74.3359	63.7168	216.972	112.314	63.8889	138.13	119.074	63.8889	32.05	76.0274	64.7059	14.404	161.998	64.3564	91.694	153.27	64.3564	46.3879	115.251	64.6465	61.9563	175.857	64.5161	79.4826	71.9172	64.8352	162.613	177.888
		63.6986	31.87	112.328	63.6364	91.751	68.4108	63.9098	86.774	146.708	64.7541	64.7439	139.357	64.6552	173.853	89.0726	64.3478	27.5	153.758	64.6018	179.085	71.4293	64.6018	216.156	115.158	64.8148	167.338	115.578	64.8148	36.108	75.8933
		64.3836	31.532	116.204	64.3357	76.827	64.7934	64.6617	89.748	148.14
Average			28.9517	111.069		76.7196	68.1206		110.463	145.537		71.0657	136.364		160.893	88.6969		23.9502	145.667		147.737	79.5278		186.692	114.998		118.466	127.256		30.1325	75.6548		12.9184	158.699		66.5834	159.004		39.1303	114.925		49.0657	176.493		86.3007	72.756		170.385	170.982
65-70		65.0685	36.925	120.462	65.035	70.102	63.0841	65.4135	87.239	151.088	65.5738	67.0082	136.082	65.5172	180.281	87.0919	65.2174	31.361	152.869	65.4867	168.803	74.2363	65.4867	186.404	115.301	65.7407	196.587	107.804	65.7407	38.584	74.0844	65.6863	16.657	162.235	65.3465	117.009	148.993	65.3465	62.0143	109.308	65.6566	64.2537	168.096	65.5914	69.3228	75.5221	65.9341	123.181	176.51
		65.7534	52.119	122.513	65.7343	67.592	62.536	66.1654	83.829	151.834	66.3934	66.1987	136.799	66.3793	183.042	86.5935	66.087	35.437	151.274	66.3717	153.093	79.3851	66.3717	157.045	116.5	66.6667	198.163	107.221	66.6667	40.178	71.0523	66.6667	16.051	163.894	66.3366	152.804	147.037	66.3366	76.6782	110.331	66.6667	68.9354	156.095	66.6667	60.7121	77.3868	67.033	109.48	175.247
		66.4384	72.067	122.654	66.4336	64.419	61.0272	66.9173	70.06	155.84	67.2131	62.7135	142.988	67.2414	180.428	85.6467	66.9565	38.906	149.948	67.2566	144.062	83.9668	67.2566	127.267	117.423	67.5926	186.306	101.22	67.5926	45.761	70.1656	67.6471	18.69	165.533	67.3267	187.193	138.552	67.3267	83.078	107.403	67.6768	70.3593	148.444	67.7419	51.2832	81.1834	68.1319	110.89	168.634
		67.1233	87.842	122.269	67.1329	67.893	60.6944	67.6692	64.82	159.742	68.0328	60.6516	132.416	68.1034	173.568	84.4237	67.8261	43.983	148.93	68.1416	142.018	93.3025	68.1416	101.971	117.225	68.5185	172.638	98.0566	68.5185	51.626	69.546	68.6275	19.89	163.983	68.3168	210.472	134.228	68.3168	81.0756	103.853	68.6869	72.3571	139.994	68.8172	47.3603	82.1142	69.2308	103.377	155.037
		67.8082	92.629	124.438	67.8322	74.264	61.3902	68.4211	70.128	159.116	68.8525	57.5529	120.182	68.9655	171.839	84.4123	68.6957	51.241	147.371	69.0265	139.278	98.0454	69.0265	81.721	116.344	69.4444	169.007	94.0779	69.4444	54.071	72.5821	69.6078	20.488	163.171	69.3069	206.014	129.912	69.3069	68.3067	107.148	69.697	73.6023	137.626	69.8925	45.4833	86.0339
		68.4932	86.552	122.892	68.5315	80.092	59.9211	69.1729	82.148	158.659	69.6721	57.3631	111.001	69.8276	183.189	82.7836	69.5652	62.481	145.203	69.9115	129.636	101.053	69.9115	67.525	116.391
		69.1781	75.733	119.864	69.2308	83.473	58.5987	69.9248	95.585	154.66
		69.863	61.881	120.583	69.9301	91.792	57.2588
Average			70.7185	121.959		74.9534	60.5638		79.1156	155.848		61.9147	129.911		178.725	85.1586		43.9015	149.266		146.148	88.3315		120.322	116.531		184.54	101.676		46.044	71.4861		18.3552	163.763		174.698	139.744		74.2306	107.609		69.9016	150.051		54.8323	80.4481		111.732	168.857
70-75		70.5479	53.16	117.579	70.6294	107.448	59.4882	70.6767	93.662	155.377	70.4918	63.2761	102.897	70.6897	197.118	80.9063	70.4348	76.213	145.564	70.7965	106.744	97.0416	70.7965	57.222	117.099	70.3704	194.827	89.9507	70.3704	54.731	74.9021	70.5882	23.017	164.939	70.297	184.312	129.071	70.297	51.2269	97.413	70.7071	72.6191	133.089	70.9677	43.8478	89.4686	70.3297	101.288	139.56
		71.2329	53.227	118.723	71.3287	121.988	59.0651	71.4286	74.22	151.562	71.3115	68.1006	95.6368	71.5517	204.366	81.3577	71.3043	85.471	140.366	71.6814	91.914	98.198	71.6814	51.955	118.262	71.2963	231.636	89.9251	71.2963	62.126	76.6179	71.5686	27.363	156.774	71.2871	158.543	127.358	71.2871	41.5755	101.763	71.7172	74.244	124.972	72.043	41.7092	93.5974	71.4286	114.195	126.236
		71.9178	57.062	117.601	72.028	135.935	58.9636	72.1805	58.004	153.567	72.1311	70.6907	93.5341	72.4138	210.961	80.7225	72.1739	92.789	138.852	72.5664	77.34	93.8839	72.5664	49.622	119.917	72.2222	245.752	87.3682	72.2222	68.893	77.3457	72.549	35.627	153.38	72.2772	139.37	128.6	72.2772	40.9305	99.659	72.7273	76.5396	119.227	73.1183	33.5352	89.5771	72.5275	129.552	120.125
		72.6027	62.104	112.158	72.7273	141.312	59.2944	72.9323	43.578	154.023	72.9508	73.7133	86.8058	73.2759	213.572	80.2288	73.0435	100.346	136.015	73.4513	66.146	99.6773	73.4513	48.688	120.309	73.1481	236.777	88.9257	73.1481	87.399	78.503	73.5294	49.296	148.392	73.2673	131.282	129.846	73.2673	39.1738	102.143	73.7374	78.7648	113.297	74.1935	30.9329	84.713	73.6264	121.923	119.576
		73.2877	67.087	108.94	73.4266	152.31	61.8132	73.6842	35.015	156.711	73.7705	72.6248	84.9967	74.1379	204.992	78.6578	73.913	113.444	132.454	74.3363	52.853	103.939	74.3363	46.25	121.572	74.0741	210.616	89.5895	74.0741	106.772	77.0429	74.5098	65.483	143.443	74.2574	130.837	130.64	74.2574	41.8947	105.639	74.7475	83.4467	110.583				74.7253	100.222	124.134
		73.9726	76.563	108.886	74.1259	165.205	61.8185	74.4361	28.566	159.176	74.5902	70.9387	85.4212				74.7826	131.252	130.335
		74.6575	88.608	109.937	74.8252	183.537	63.5023
Average			65.4016	113.404		143.962	60.5636		55.5075	155.069		69.8907	91.5485		206.202	80.3746		99.9192	137.264		78.9994	98.5479		50.7474	119.432		223.922	89.1518		75.9842	76.8823		40.1572	153.386		148.869	129.103		42.9603	101.323		77.1228	120.234		37.5063	89.339		113.436	125.926
75-80		75.3425	99.439	106.999	75.5245	198.52	63.2208	75.188	25.538	163.75	75.4098	71.1001	83.3675	75	193.443	76.7813	75.6522	152.659	127.287	75.2212	46.794	100.51	75.2212	44.817	121.794	75	173.679	91.0532	75	135.819	74.1078	75.4902	81.544	140.144	75.2475	124.82	131.456	75.2475	46.2667	107.566	75.7576	79.8626	115.1	75.2688	31.5921	77.8931	75.8242	83.048	128.12
		76.0274	123.092	103.434	76.2238	209.827	64.3253	75.9398	22.308	162.794	76.2295	70.4345	82.2676	75.8621	179.787	75.0983	76.5217	163.143	126.345	76.1062	35.921	93.126	76.1062	41.505	121.515	75.9259	133.958	92.127	75.9259	156.905	74.2104	76.4706	97.944	139.203	76.2376	118.331	138.173	76.2376	48.7642	112.381	76.7677	74.0095	118.076	76.3441	25.9178	75.952	76.9231	78.865	135.741
		76.7123	132.658	107.246	76.9231	211.935	65.8279	76.6917	22.497	166.503	77.0492	73.4704	80.998	76.7241	166.06	74.5136	77.3913	159.638	121.901	76.9912	29.934	93.3977	76.9912	37.272	123.173	76.8519	113.948	97.31	76.8519	172.029	75.879	77.451	111.662	133.849	77.2277	117.496	142.986	77.2277	50.0017	117.062	77.7778	68.7061	119.853	77.4194	24.9598	78.9257	78.022	80.074	142.216
		77.3973	151.39	103.415	77.6224	199.581	66.5472	77.4436	23.907	166.512	77.8689	81.3556	85.8623	77.5862	160.056	73.4073	78.2609	154.185	120.901	77.8761	25.735	86.4519	77.8761	36.718	121.902	77.7778	103.449	99.2754	77.7778	176.825	74.7808	78.4314	118.862	134.286	78.2178	111.397	150.746	78.2178	53.3668	119.555	78.7879	64.0526	120.383	78.4946	21.4863	81.2518	79.1209	77.824	146.012
		78.0822	171.782	101.61	78.3217	184.175	66.1369	78.1955	22.413	164.37	78.6885	82.8812	79.9874	78.4483	170.25	74.1445	79.1304	158.264	124.292	78.7611	23.174	76.8084	78.7611	36.34	118.863	78.7037	96.31	97.7049	78.7037	162.183	75.8582	79.4118	117.416	137.502	79.2079	105.806	155.638	79.2079	53.8442	122.683	79.798	55.8019	123.308	79.5699	23.6733	87.2544
		78.7671	197.131	96.8811	79.021	162.274	66.3662	78.9474	20.545	169.121	79.5082	85.6684	75.8814	79.3103	183.875	75.6214				79.646	20.957	79.8492	79.646	37.353	116.726	79.6296	95.278	99.3121	79.6296	146.076	74.3633
		79.4521	223.076	92.7525	79.7203	144.031	69.495	79.6992	20.451	168.459
Average			156.938	101.762		187.192	65.9885		22.5227	165.93		77.485	81.394		175.578	74.9277		157.578	124.145		30.4192	88.3572		39.0008	120.662		119.437	96.1304		158.306	74.8666		105.486	136.997		115.57	143.8		50.4487	115.849		68.4865	119.344		25.5259	80.2554		79.9528	138.022
80-85		80.137	243.297	87.3318	80.4196	134.981	71.9258	80.4511	20.753	165.637	80.3279	80.4956	72.6656	80.1724	180.246	74.6888	80	168.301	122.603	80.531	21.041	76.2039	80.531	38.334	113.933	80.5556	91.325	102.497	80.5556	126.85	74.4443	80.3922	108.332	136.664	80.198	95.55	159.242	80.198	48.5112	125.987	80.8081	47.7781	128.027	80.6452	21.1563	94.5237	80.2198	75.844	147.099
		80.8219	252.496	90.2694	81.1189	143.705	72.8778	81.203	19.736	164.274	81.1475	75.5027	71.9692	81.0345	157.388	75.4617	80.8696	179.143	122.264	81.4159	18.064	78.9385	81.4159	40.574	113.909	81.4815	96.472	106.625	81.4815	116.807	75.1291	81.3725	98.983	135.563	81.1881	84.946	158.741	81.1881	41.3805	133.232	81.8182	43.2151	130.432	81.7204	19.0688	93.9941	81.3187	72.435	143.213
		81.5068	226.19	90.1767	81.8182	144.942	75.0969	81.9549	21.79	163.067	81.9672	67.761	69.6207	81.8966	123.885	77.461	81.7391	171.339	122.845	82.3009	16.04	79	82.3009	43.831	117.037	82.4074	108.423	110.255	82.4074	107.253	73.8975	82.3529	93.577	137.502	82.1782	79	157.44	82.1782	35.0683	138.266	82.8283	41.2372	136.405	82.7957	19.086	90.4704	82.4176	63.942	140.897
		82.1918	176.463	89.939	82.5175	141.717	75.5069	82.7068	18.006	168.811	82.7869	61.3982	67.4083	82.7586	95.441	76.8547	82.6087	152.686	123.367	83.1858	18.94	83.9	83.1858	46.47	117.034	83.3333	126.93	113.026	83.3333	95.596	73.2172	83.3333	97.919	139.685	83.1683	78.3	154	83.1683	33.7881	145.861	83.8384	37.7652	141.78	83.871	17.3675	89.1423	83.5165	53.616	142.95
		82.8767	137.136	89.7312	83.2168	124.333	75.44	83.4586	17.308	168.059	83.6066	54.6626	64.5905	83.6207	79.403	78.0218	83.4783	117.26	126.332	84.0708	16.06	87.92	84.0708	44.213	121.517	84.2593	139.291	119.23	84.2593	73.724	72.2182	84.3137	111.13	141.583	84.1584	72.6	153.3	84.1584	32.0381	147.503	84.8485	34.2002	145.797	84.9462	19.5595	80.5834	84.6154	50.116	136.897
		83.5616	106.651	89.3762	83.9161	98.528	75.1813	84.2105	18.235	168.773	84.4262	47.3375	62.2171	84.4828	67.957	78.4894	84.3478	84.001	130.21	84.9558	15.02	93.88	84.9558	41.145	122.296
		84.2466	108.687	90.2926	84.6154	71.781	75.2728	84.9624	17.312	170.362
		84.9315	118.296	85.4573
Average			171.152	89.0718		122.855	74.4716		19.02	166.998		64.5263	68.0786		117.387	76.8296		145.455	124.604		17.5275	83.3071		42.4278	117.621		112.488	110.327		104.046	73.7813		101.988	138.2		82.0792	156.545		38.1572	138.17		40.8392	136.488		19.2476	89.7428		63.1906	142.211
85-90		85.6164	123.527	87.457	85.3147	55.787	75.7678	85.7143	16.013	168.559	85.2459	35.3493	66.0674	85.3448	60.987	76.1575	85.2174	60.008	132.828	85.8407	15	81.26	85.8407	36.766	127.218	85.1852	145.86	120.148	85.1852	55.573	74.3162	85.2941	133.433	141.329	85.1485	63.16	149.42	85.1485	26.5662	157.983	85.8586	31.0871	148.831	86.0215	16.9844	79.3688	85.7143	44.925	141.076
		86.3014	112.202	89.8362	86.014	48.82	78.516	86.4662	17.062	166.812	86.0656	27.458	65.0818	86.2069	56.875	77.4673	86.087	46.046	136.227	86.7257	12.06	90.8	86.7257	31.934	129.988	86.1111	146.099	114.557	86.1111	40.504	75.5746	86.2745	151.082	142.981	86.1386	57.02	152.28	86.1386	24.7702	166.248	86.8687	30.8313	152.899	87.0968	15.1242	77.3397	86.8132	40.959	135.77
		86.9863	91.214	89.2246	86.7133	41.784	81.2275	87.218	16	161.004	86.8852	18.5102	66.7861	87.069	49.638	78.1879	86.9565	40.098	134.758	87.6106	14.94	90.02	87.6106	27.625	132.496	87.037	131.964	108.43	87.037	31.805	77.162	87.2549	164.265	143.865	87.1287	50.3	154.14	87.1287	21.293	174.063	87.8788	29.714	154.137	88.172	17.5741	76.9203	87.9121	40.121	132.346
		87.6712	69.221	92.2399	87.4126	34.183	83.3407	87.9699	15.97	161.178	87.7049	18.3849	66.8671	87.931	42.254	77.3578	87.8261	34.014	133.695	88.4956	15	105.68	88.4956	26.051	134.083	87.963	111.492	106.505	87.963	29.759	78.7094	88.2353	168.113	148.453	88.1188	45.02	155	88.1188	18.1487	188.37	88.8889	26.4935	150.698	89.2473	14.6768	82.0441	89.011	40.136	135.023
		88.3562	50.453	93.8516	88.1119	29.133	84.9793	88.7218	15.156	155.016	88.5246	17.141	68.7446	88.7931	32.576	79.2527	88.6957	29.481	131.716	89.3805	12.06	100.12	89.3805	23.925	134.277	88.8889	92.428	106.266	88.8889	29.775	83.0242	89.2157	166.657	151.451	89.1089	38.44	154.58	89.1089	18.7575	200.616	89.899	21.4084	148.658
		89.0411	36.581	95.9573	88.8112	23.889	86.54	89.4737	8.869	152.6	89.3443	16.0491	70.1897	89.6552	25.297	77.488	89.5652	25.974	131.288							89.8148	82.591	108.224	89.8148	28.374	85.4644
		89.726	30.368	101.784	89.5105	20.002	85.9399
Average			73.3666	92.9072		36.2283	82.3302		14.845	160.861		22.1488	67.2895		44.6045	77.6519		39.2702	133.419		13.812	93.576		29.2602	131.613		118.406	110.688		35.965	79.0418		156.71	145.616		50.788	153.084		21.9071	177.456		27.9069	151.045		16.0899	78.9182		41.5352	136.054
90-95		90.411	26.573	103.811	90.2098	17.327	82.8736	90.2256	0	151.616	90.1639	16.3973	71.2284	90.5172	20.853	79.9918	90.4348	23.088	130.05	90.2655	12.98	96.08	90.2655	23.976	133.112	90.7407	77.063	112.643	90.7407	26.826	85.6564	90.1961	154.167	152.112	90.099	34.72	151.16	90.099	17.2172	214.344	90.9091	18.6083	150.599	90.3226	15.0699	89.5151	90.1099	41.044	137.431
		91.0959	24.236	111.041	90.9091	15.666	80.2817	90.9774	0	151.203	90.9836	14.1243	73.5706	91.3793	17.842	80.5811	91.3043	23.718	130.898	91.1504	11.04	97.96	91.1504	22.323	136.73	91.6667	75.188	121.264	91.6667	25.246	85.038	91.1765	135.567	155.101	91.0891	32.72	145.3	91.0891	16.1803	223.65	91.9192	18.5131	151.334	91.3978	15.8864	97.6564	91.2088	41.964	142.659
		91.7808	23.722	118.817	91.6084	15	79.7756	91.7293	0	156.719	91.8033	13.9596	72.6717	92.2414	16.953	79.5258	92.1739	21.85	136.436	92.0354	11	107.8	92.0354	21.757	131.919	92.5926	79.299	127.64	92.5926	24.71	87.7065	92.1569	119.772	155.48	92.0792	30.44	139.88	92.0792	16.6338	226.371	92.9293	16.9869	153.199	92.4731	16.4321	106.566	92.3077	37.064	141.922
		92.4658	19.186	120.972	92.3077	14.201	77.8492	92.4812	0	166.76	92.623	12.5524	70.8875	93.1034	16.885	79.6965	93.0435	20.039	141.436	92.9204	9.04	109.96	92.9204	22.468	131.019	93.5185	78.499	131.742	93.5185	23.175	88.6809	93.1373	101.573	156.946	93.0693	26.72	132.02	93.0693	15.2265	229.915	93.9394	16.5289	152.605	93.5484	15.8798	111.488	93.4066	31.959	148.981
		93.1507	18.532	118.652	93.007	12	76.5383	93.2331	0	172.378	93.4426	11.2853	68.0722	93.9655	15.698	83.0601	93.913	19.648	145.78	93.8053	9.98	106.08	93.8053	22.094	134.505	94.4444	73.829	137.738	94.4444	22.116	88.2942	94.1176	80.384	159.431	94.0594	25.217	125.241	94.0594	14	225.275	94.9495	14.959	158.39	94.6237	15.777	111.346	94.5055	30.015	153.316
		93.8356	17.758	120.404	93.7063	12.14	75.61	93.985	0	170.957	94.2623	11.0488	66.4843	94.8276	14.073	81.1459	94.7826	18.579	152.712	94.6903	10	105.02	94.6903	21.25	133.899
		94.5205	17.139	116.679	94.4056	11.5	76.25	94.7368	0	170.272
Average			21.0209	115.768		13.9763	78.4541		0	162.844		13.2279	70.4858		17.0507	80.6669		21.1537	139.552		10.6733	103.817		22.3113	133.53		76.7756	126.205		24.4146	87.0752		118.293	155.814		29.9634	138.72		15.8516	223.911		17.1192	153.225		15.809	103.314		36.4092	144.862
95-100		95.2055	17	112.628	95.1049	12.04	76.31	95.4887	0	163.249	95.082	12.2208	63.5467	95.6897	14.635	83.4191	95.6522	17.492	156.423	95.5752	10	106.96	95.5752	20.186	134.567	95.3704	67.298	137.919	95.3704	19.337	90.4894	95.098	60.018	156.99	95.0495	25.43	120.297	95.0495	13.74	208.967	95.9596	13.6211	159.397	95.6989	15.3373	106.368	95.6044	24.709	162.392
		95.8904	18.089	105.621	95.8042	11.04	76.68	96.2406	0	159.995	95.9016	12.0479	66.3686	96.5517	13.292	86.3452	96.5217	16.759	161.342	96.4602	10	101.12	96.4602	22.88	131.905	96.2963	55.764	132.863	96.2963	18.316	92.9335	96.0784	43.204	154	96.0396	23.64	115.67	96.0396	14.6435	196.948	96.9697	12.0248	155.383	96.7742	15.9072	97.8791	96.7033	24.013	169.606
		96.5753	17.46	101.619	96.5035	11.22	76.34	96.9925	0	149.018	96.7213	11.1421	71.4404	97.4138	12.469	87.9772	97.3913	16.024	165.885	97.3451	9.02	107.86	97.3451	20.963	130.332	97.2222	46.994	123.991	97.2222	19.281	91.1216	97.0588	31.744	152.9	97.0297	23.008	108.089	97.0297	14.5352	193.124	97.9798	11.1783	143.385	97.8495	16.6643	95.4527	97.8022	20.787	177.233
		97.2603	14.961	99.8444	97.2028	11.68	75.89	97.7444	0	136.805	97.541	11.2495	72.5053	98.2759	11.002	91.2517	98.2609	14.271	168.005	98.2301	9	110.94	98.2301	21.383	124.98	98.1481	40.922	112.052	98.1481	17.666	91.5528	98.0392	25.359	150.557	98.0198	21.146	102.457	98.0198	13.1715	196.926	98.9899	11.101	130.157	98.9247	17.1369	100.546	98.9011	19.991	176.923
		97.9452	15.518	97.0914	97.9021	11	73.25	98.4962	0	128.218	98.3607	10.4375	69.4908	99.1379	11.813	90.9812	99.1304	13.237	163.282	99.115	9.98	106.1	99.115	21.351	120.232	99.0741	36.206	95.612	99.0741	17.337	93.2477	99.0196	21.979	149.4	99.0099	20.342	90.9412	99.0099	12.7094	203.053	100	9.3282	118.73	100	17.1835	107.963	100	18.268	180.256
		98.6301	14.829	95.3	98.6014	11.73	73.27	99.2481	0	119.198	99.1803	10.2242	63.3023	100	11.04	89.0744	100	13.941	150.736	100	10	98.16	100	20.258	114.142	100	35.776	80.4497	100	17.359	97.7715	100	19.312	147.868	100	18.432	81.0427	100	11.8248	205.139
		99.3151	12.666	97.3068	99.3007	11.97	75.28	100	0	114.552	100	10.3716	59.6091
		100	13.681	97.9009	100	12.8	76.64
Average			15.5255	100.914		11.685	75.4575		0	138.719		11.0991	66.609		12.3752	88.1748		15.2873	160.945		9.66667	105.19		21.1702	126.026		47.16	113.815		18.216	92.8528		33.6027	151.952		21.9997	103.083		13.4374	200.693		11.4507	141.41		16.4458	101.642		21.5536	173.282
[truncated: 36 more columns]

## Sheet: Summary
% Chromosome Length		Mean	STDDEV	SEM
5	FISH	17.2868	8.57348	1.62024
	IF	119.442	25.3742	4.79527
10	FISH	17.8098	9.4284	1.7818
	IF	124.172	20.948	3.9588
15	FISH	19.1135	10.0213	1.89386
	IF	127.833	21.1189	3.99109
20	FISH	19.6563	8.35205	1.57839
	IF	129.262	23.8549	4.50815
25	FISH	19.3407	8.87013	1.6763
	IF	127.041	26.575	5.02221
30	FISH	19.452	8.50297	1.60691
	IF	127.892	28.1213	5.31442
35	FISH	20.0987	8.9132	1.68444
	IF	128.385	32.3821	6.11964
40	FISH	21.7178	10.4808	1.98069
	IF	127.996	30.2827	5.7229
45	FISH	25.085	15.6881	2.96476
	IF	128.271	29.7565	5.62346
50	FISH	30.3307	23.3496	4.41267
	IF	130	28.0454	5.30008
55	FISH	44.6896	41.2442	7.79442
	IF	129.38	28.4194	5.37076
60	FISH	58.8353	44.1488	8.34334
	IF	125.476	28.4613	5.37869
65	FISH	81.1187	56.1059	10.603
	IF	122.491	30.9934	5.8572
70	FISH	91.7895	52.6506	9.95004
	IF	116.023	30.2062	5.70844
75	FISH	89.2937	49.3767	9.33133
	IF	108.48	26.6069	5.02824
80	FISH	87.5661	49.8343	9.41779
	IF	108.061	27.9411	5.28037
85	FISH	69.6562	42.5591	8.04291
	IF	112.677	30.237	5.71425
90	FISH	46.1058	36.0833	6.8191
	IF	117.012	30.6291	5.78836
95	FISH	31.3878	25.9866	4.91101
	IF	123.323	36.6965	6.93499
100	FISH	19.9232	10.7071	2.02345
	IF	120.432	33.9557	6.41702
