# Supplementary material for: Large domains of heterochromatin direct the formation of short mitotic chromosome loops
Source: eLife. 2020 Sep 11;9:e57212. doi: 10.7554/eLife.57212 (PMC7515631; doi:10.7554/eLife.57212)
Supplement: Figure 1—source data 3. [file elife-57212-fig1-data3.xlsx]

## Sheet: All data - Binned
	2A	GFP	FISH	2B	GFP	FISH	4A	GFP	FISH	4B	GFP	FISH	6A	GFP	FISH	6B	GFP	FISH	7	GFP	FISH	13	GFP	FISH	14A	GFP	FISH	14B	GFP	FISH	15	GFP	FISH	17	GFP	FISH	18	GFP	FISH	20	GFP	FISH	21	GFP	FISH	23	GFP	FISH	35
	X	Y	Y	X	Y	Y	X	Y	Y	X	Y	Y	X	Y	Y	X	Y	Y	X	Y	Y	X	Y	Y	X	Y	Y	X	Y	Y	X	Y	Y	X	Y	Y	X	Y	Y	X	Y	Y	X	Y	Y	X	Y	Y	X
0	0	122	27	0	213	34	0	103	16	0	122	23	0	71	9	0	75	14	0	103	34	0	85	33	0	114	19	0	159	29	0	139	37	0	100	75	0	105	41	0	124	28	0	139	52	0	152	29	0
1	2.5	121.303	26.4083	2.43902	211.773	42.5612	2.22222	99.409	16.7782	2.17391	125.268	21.3678	2.27273	77.2743	8.3053	2.5641	79.46	13.1708	1.40845	104.165	33.1688	1.92308	85.6213	29.4289	2.38095	118.649	21.0844	2.04082	152.234	29.8963	3.0303	139.796	34.9724	2.77778	101.986	76.4897	2.63158	102.083	38.8408	2.77778	127.183	29.7507	2.17391	137.288	37.846	1.72414	150.33	28.8389	1.75439
2	5	121.641	33.5188	4.87805	209.15	40.1783	4.44444	96.3404	18.7362	4.34783	122.359	21.3344	4.54545	79.0103	8.6905	5.12821	81.2566	11.0461	2.8169	107.989	27.7952	3.84615	86.3137	29.6863	4.7619	119.238	18.4237	4.08163	147.427	27.9113	6.06061	139.29	33.6646	5.55556	106.831	72.206	5.26316	102.332	40.1589	5.55556	130.901	21.6756	4.34783	137.001	45.6889	3.44828	149.566	30.6676	3.50877
3	7.5	124.66	33.1641	7.31707	203.208	43.5194	6.66667	93.7409	20.2311	6.52174	121.146	20.914	6.81818	80.1608	8.9373	7.69231	79.2156	11.7377	4.22535	105.18	31.8128	5.76923	87.136	30.6213	7.14286	115.701	19.8624	6.12245	141.705	23.6361	9.09091	138.193	36.2527	8.33333	109.581	62.1709	7.89474	103.727	38.2357	8.33333	132.674	21.9952	6.52174	133.98	43.0174	5.17241	146.308	30.5008	5.26316
4	10	134.727	31.1387	9.7561	194.427	40.7406	8.88889	93.7883	18.9472	8.69565	121.334	20.7748	9.09091	79.478	10.5636	10.2564	79.0813	12.0553	5.6338	104.56	30.2335	7.69231	88.5147	27.8284	9.52381	115.483	18.8971	8.16327	137.501	28.4185	12.1212	133.345	37.3562	11.1111	113.339	66.75	10.5263	103.681	38.9964	11.1111	135.578	22.542	8.69565	135.468	49.4327	6.89655	144.394	28.1477	7.01754
5	12.5	139.437	30.5031	12.1951	188.502	37.6923	11.1111	93.5253	19.7309	10.8696	120.666	21.1573	11.3636	78.1532	9.3296	12.8205	80.9832	12.6844	7.04225	103.895	28.8432	9.61538	89.2107	25.4315	11.9048	112.007	18.0077	10.2041	135.566	30.4307	15.1515	128.018	39.7918	13.8889	115.632	63.8797	13.1579	108.693	39.5506	13.8889	135.899	23.4187	10.8696	137.616	55.2122	8.62069	141.199	28.9119	8.77193
6	15	145.576	33.9469	14.6341	177.1	39.7768	13.3333	94.6682	19.1949	13.0435	121.789	24.1326	13.6364	77.5518	8.4591	15.3846	82.2326	13.0836	8.4507	100.032	37.2589	11.5385	89.7574	24.1989	14.2857	112.513	22.2251	12.2449	132.49	36.9333	18.1818	126	38.8067	16.6667	120.304	67.0347	15.7895	111.054	43.0432	16.6667	136.073	26.0667	13.0435	135.235	47.4258	10.3448	136.75	29.6895	10.5263
7	17.5	144.151	32.196	17.0732	170.971	39.7486	15.5556	98.2972	19.4146	15.2174	121.658	24.283	15.9091	76.3181	11.4938	17.9487	82.1282	11.2603	9.85915	97.1972	29.692	13.4615	95.5503	26.5654	16.6667	115.57	23.1685	14.2857	127.119	31.7923	21.2121	120.835	38.7159	19.4444	121.029	63.4553	18.4211	110.37	37.1536	19.4444	135.117	28.7214	15.2174	135.065	40.3261	12.069	131.785	31.2708	12.2807
8	20	145.115	34.3374	19.5122	169.849	45.9751	17.7778	102.955	19.2675	17.3913	125.967	25.174	18.1818	77.7935	10.9041	20.5128	86.0215	12.7814	11.2676	98.4301	36.6922	15.3846	95.9807	25.873	19.0476	116.158	24.0298	16.3265	124.765	24.7059	24.2424	116.844	43.9981	22.2222	116.561	61.6	21.0526	110.351	35.9854	22.2222	132.173	26.625	17.3913	134.404	37.418	13.7931	126.308	33.7115	14.0351
9	22.5	145.82	31.9117	21.9512	169.817	42.7293	20	106.828	20.1287	19.5652	129.31	20.8207	20.4545	76.6937	9.354	23.0769	89.8735	15.8208	12.6761	98.0069	30.5794	17.3077	97.6289	25.7435	21.4286	116.27	26.4511	18.3673	119.151	25.4327	27.2727	112.481	45.0496	25	110.948	65.2858	23.6842	113.841	40.6927	25	135.125	25.455	19.5652	133.831	44.515	15.5172	122.646	31.7515	15.7895
10	25	142.491	33.7436	24.3902	169.873	41.3903	22.2222	112.393	17.7349	21.7391	132.308	21.3269	22.7273	78.2399	8.5361	25.641	88.6069	15.9148	14.0845	99.9692	32.7503	19.2308	100.223	27.3095	23.8095	117.246	25.8619	20.4082	120.154	27.5883	30.303	108.871	40.5599	27.7778	107.001	60.8711	26.3158	116.457	46.8277	27.7778	135.264	27.542	21.7391	130.448	36.1485	17.2414	121.063	33.4996	17.5439
11	27.5	136.062	28.2903	26.8293	167.306	40.9045	24.4444	120.991	20.0715	23.913	134.864	22.3802	25	77.5118	9.2369	28.2051	91.2375	15.4576	15.493	103.549	33.6424	21.1538	103.546	22.6405	26.1905	114.572	23.025	22.449	122.454	23.0493	33.3333	108.476	48.0729	30.5556	103.53	65.0042	28.9474	116.061	49.8239	30.5556	133.159	25.8504	23.913	130.123	38.0219	18.9655	122.154	36.9305	19.2982
12	30	130.952	33.3993	29.2683	164.86	38.8235	26.6667	130.972	18.6305	26.087	137.702	23.2619	27.2727	81.5572	9.5927	30.7692	94.8524	15.1698	16.9014	103.341	24.5128	23.0769	110.89	25.065	28.5714	114.521	24.9664	24.4898	121.654	19.4528	36.3636	109.181	52.0774	33.3333	102.149	68.8813	31.5789	116.859	49.7245	33.3333	128.704	30.5502	26.087	133.279	35.7434	20.6897	121.349	33.7471	21.0526
13	32.5	125.248	37.2758	31.7073	163.639	38.0853	28.8889	135.154	20.2655	28.2609	134.414	24.0104	29.5455	83.777	10.5581	33.3333	90.0577	14.9889	18.3099	104.692	29.6122	25	114.731	26.5867	30.9524	113.145	30.4906	26.5306	121.912	22.747	39.3939	110.921	56.0081	36.1111	100.152	67.6638	34.2105	114.307	44.786	36.1111	121.12	23.866	28.2609	133.853	36.2327	22.4138	121.121	39.4319	22.807
14	35	122.272	33.487	34.1463	162.715	41.9236	31.1111	131.828	21.0971	30.4348	132.754	24.8784	31.8182	84.3406	10.4803	35.8974	88.1846	17.7877	19.7183	103.361	36.2925	26.9231	119.825	26.8379	33.3333	113.73	27.8425	28.5714	122.88	25.3274	42.4242	111.142	71.4898	38.8889	97.413	72.2577	36.8421	115.658	43.1453	38.8889	118.816	26.6669	30.4348	135.162	40.6175	24.1379	116.535	33.1969	24.5614
15	37.5	119.436	34.1047	36.5854	159.621	38.299	33.3333	130.906	20.2502	32.6087	128.229	25.7591	34.0909	84.5756	10.8155	38.4615	88.5789	18.8547	21.1268	105.614	34.3934	28.8462	124.412	26.7024	35.7143	113.54	26.1911	30.6122	121.481	22.3076	45.4545	110.476	91.6824	41.6667	95.1762	73.3298	39.4737	108.574	44.6343	41.6667	113.141	24.7795	32.6087	137	40.972	25.8621	113.079	31.1842	26.3158
16	40	116.76	37.7422	39.0244	157.308	40.5805	35.5556	130.114	19.1493	34.7826	127.055	23.2701	36.3636	86.5447	11.3277	41.0256	83.2839	20.939	22.5352	105.556	32.5913	30.7692	124.033	23.252	38.0952	117.393	26.6846	32.6531	118.456	24.4015	48.4848	109.145	100.742	44.4444	94.0778	68.8773	42.1053	108.458	44.8497	44.4444	110.353	30.0599	34.7826	136.91	40.3212	27.5862	111.497	28.8915	28.0702
17	42.5	113.963	39.986	41.4634	157.347	42.211	37.7778	125.235	22.2567	36.9565	129.37	23.8405	38.6364	82.9829	10.8193	43.5897	86.4565	25.2253	23.9437	104.965	42.2326	32.6923	123.97	23.8479	40.4762	118.423	25.8985	34.6939	118.085	23.5252	51.5152	110.495	110.973	47.2222	94.8241	75.0825	44.7368	106.412	48.0771	47.2222	110.22	32.1576	36.9565	134.549	45.8958	29.3103	110.727	28.8783	29.8246
18	45	113.137	42.711	43.9024	153.686	43.9408	40	123.559	23.8647	39.1304	127.76	23.5574	40.9091	82.336	11.6468	46.1538	86.2284	33.1982	25.3521	104.994	34.2475	34.6154	125.297	23.9598	42.8571	122.218	28.3378	36.7347	115.833	25.6338	54.5455	109.73	120.795	50	93.3767	70.3902	47.3684	104.834	56.1923	50	105.552	37.3496	39.1304	133.317	36.9158	31.0345	110.517	29.9895	31.5789
19	47.5	113.865	50.5955	46.3415	148.637	49.2688	42.2222	126.182	23.5255	41.3043	128.356	27.817	43.1818	81.067	13.7776	48.7179	90.042	35.2774	26.7606	105.109	33.307	36.5385	123.221	25.4368	45.2381	124.86	29.3808	38.7755	113.606	26.9603	57.5758	109.475	121.454	52.7778	92.6836	67.664	50	101.39	61.4121	52.7778	102.7	35.2014	41.3043	129.726	38.8797	32.7586	113.244	25.4004	33.3333
20	50	115.482	60.1935	48.7805	144.25	50.7535	44.4444	129.774	26.1114	43.4783	126.737	30.3602	45.4545	81.4631	13.4478	51.2821	89.8295	36.8985	28.169	106.68	36.2004	38.4615	120.031	26.7148	47.619	125.087	25.0813	40.8163	114.455	24.0388	60.6061	108.653	132.127	55.5556	92.4454	78.3367	52.6316	98.6311	60.6566	55.5556	101.206	41.0391	43.4783	130.453	43.5088	34.4828	115.011	23.0339	35.0877
21	52.5	114.697	67.3268	51.2195	139.361	55.213	46.6667	124.31	27.2034	45.6522	124.935	31.6574	47.7273	84.321	14.1672	53.8462	90.831	42.7752	29.5775	107.797	38.0995	40.3846	119.525	25.4219	50	120.911	30.0552	42.8571	109.984	24.9436	63.6364	104.708	144.271	58.3333	93.8024	87.8141	55.2632	96.764	71.0534	58.3333	101.45	41.2636	45.6522	129.448	42.2686	36.2069	111.622	25.2617	36.8421
22	55	115.641	80.4273	53.6585	133.784	60.6049	48.8889	120.819	30.1533	47.8261	127.639	33.4839	50	86.7032	15.1176	56.4103	88.2598	47.5031	30.9859	107.034	32.998	42.3077	116.487	26.172	52.381	116.59	34.8995	44.898	108.747	24.1305	66.6667	102.428	142.193	61.1111	97.6272	92.941	57.8947	95.7228	94.6471	61.1111	96.4043	46.2703	47.8261	130.077	40.4484	37.931	115.612	24.5579	38.5965
23	57.5	113.988	97.0578	56.0976	124.635	66.0618	51.1111	120.263	36.4486	50	125.828	42.4493	52.2727	86.5226	17.7298	58.9744	83.9951	53.5272	32.3944	105.164	31.27	44.2308	114.675	32.2919	54.7619	112.987	37.8523	46.9388	104.254	28.0798	69.697	102.528	150.045	63.8889	91.8201	107.011	60.5263	92.9617	127.533	63.8889	91.4857	51.2311	50	133.795	48.6945	39.6552	107.636	27.6113	40.3509
24	60	109.36	109.649	58.5366	115.478	70.5377	53.3333	120.195	35.2177	52.1739	124.606	49.7653	54.5455	87.1845	17.3281	61.5385	81.7455	55.726	33.8028	103.4	31	46.1538	115.629	27.3506	57.1429	108.633	32.0858	48.9796	102.918	31.3518	72.7273	104.651	149.361	66.6667	91.1271	114.762	63.1579	93.3623	149.267	66.6667	88.4291	47.7109	52.1739	132.536	52.8169	41.3793	107.168	23.6119	42.1053
25	62.5	104.39	120.86	60.9756	108.973	96.1239	55.5556	115.869	40.8366	54.3478	123.195	53.7385	56.8182	84.6243	23.0686	64.1026	83.9502	68.4167	35.2113	104.8	32.6	48.0769	114.704	25.8152	59.5238	108.352	37.855	51.0204	102.9	32.4	75.7576	110.419	138.192	69.4444	87.2056	150.662	65.7895	97.8158	154.788	69.4444	85.5493	48.225	54.3478	135.7	58.0838	43.1034	105.882	26.4286	43.8596
26	65	97.1977	128.691	63.4146	101.782	118.793	57.7778	122.32	44.0163	56.5217	124.118	53.498	59.0909	83.8625	30.0738	66.6667	81.2228	71.2707	36.6197	104.8	34.2	50	115.106	30.9247	61.9048	108.296	39.8355	53.0612	105.372	32.1062	78.7879	113.605	113.475	72.2222	81.1197	182.239	68.4211	101.986	139.982	72.2222	88.7379	51.2084	56.5217	135.393	56.2051	44.8276	108.477	27.7867	45.614
27	67.5	95.9102	135.984	65.8537	99.5719	149.561	60	115.146	50.7294	58.6957	125.167	63.0576	61.3636	82.4723	37.7742	69.2308	79.6189	80.6573	38.0282	103.4	32.2	51.9231	116.695	28.6498	64.2857	110.898	44.6289	55.102	107.995	37.3756	81.8182	117.838	108.189	75	78.7953	219.317	71.0526	109.828	138.079	75	90.5807	51.3751	58.6957	131.129	63.1315	46.5517	108.988	28.6037	47.3684
28	70	96	128	68.2927	100.822	163.534	62.2222	115.316	56.7413	60.8696	126.141	75.0164	63.6364	85.7028	40.7488	71.7949	76.9176	82.6528	39.4366	102.4	32.6	53.8462	117.289	33.1013	66.6667	109.834	48.3567	57.1429	109.323	37.7147	84.8485	121.516	89.5309	77.7778	79.2795	221.038	73.6842	111.622	132.321	77.7778	94.1016	51.0008	60.8696	124.994	69.9497	48.2759	109.906	28.552	49.1228
29	72.5	100.927	99.2503	70.7317	104.6	167.931	64.4444	116.928	66.7841	63.0435	130.082	94.8437	65.9091	87.0387	41.6532	74.359	80.9268	73.5606	40.8451	99.6	35.4	55.7692	116.438	40.5632	69.0476	109.988	55.4852	59.1837	111.04	40.2786	87.8788	125.334	83.4318	80.5556	81.6033	195.798	76.3158	114.827	112.175	80.5556	98.4872	53.5772	63.0435	125.119	76.8453	50	114.725	28.5535	50.8772
30	75	107.823	74.0052	73.1707	108.734	161.251	66.6667	115.915	76.1984	65.2174	129.392	102.118	68.1818	81.4008	41.5544	76.9231	81.2215	65.8999	42.2535	98.2	36	57.6923	114.792	47.2211	71.4286	110.87	55.8803	61.2245	114.179	44.3623	90.9091	125.51	73.765	83.3333	87.7323	176.823	78.9474	115.437	83.6394	83.3333	103.767	46.4832	65.2174	127.018	87.2211	51.7241	116.645	26.2617	52.6316
31	77.5	116.153	66.7985	75.6098	115.18	152.547	68.8889	114.465	72.4078	67.3913	121.635	104.374	70.4545	76.869	41.2773	79.4872	86.9787	56.1434	43.662	96.6	34.8	59.6154	114.77	62.0205	73.8095	114.609	53.6784	63.2653	114.611	41.5595	93.9394	124.533	61.6156	86.1111	92.599	141.534	81.5789	118.254	69.5124	86.1111	104.928	40.0369	67.3913	124.563	107.724	53.4483	118.187	26.1909	54.386
32	80	121.999	56.3335	78.0488	122.16	150.433	71.1111	112.012	67.6429	69.5652	122.185	99.9599	72.7273	74.8831	46.0632	82.0513	91.0458	44.9929	45.0704	95.2	34.2	61.5385	112.609	74.612	76.1905	116.158	56.2088	65.3061	113.904	46.7233	96.9697	121.224	52.5799	88.8889	96.8685	139.45	84.2105	118.383	59.8066	88.8889	104.374	32.9664	69.5652	121.669	132.631	55.1724	119.728	29.4756	56.1404
33	82.5	125.574	51.9599	80.4878	124.456	134.993	73.3333	110.113	60.0307	71.7391	116.959	98.0764	75	77.4989	47.4989	84.6154	89.9802	35.9213	46.4789	93.6	36	63.4615	108.866	87.8172	78.5714	118.217	53.6239	67.3469	113.789	50.7357	100	120.6	57.2835	91.6667	100.972	128.294	86.8421	117.103	60.4676	91.6667	102.684	35.1306	71.7391	119.457	133.538	56.8966	121.045	31.2509	57.8947
34	85	125.068	45.4943	82.9268	126.825	120.294	75.5556	112.632	56.2185	73.913	118.604	101.191	77.2727	76.9473	48.461	87.1795	91.7357	31.0197	47.8873	93	36.8	65.3846	102.853	94.7085	80.9524	120.113	40.7341	69.3878	112.768	59.4082				94.4444	100.047	120.131	89.4737	115.314	57.9142	94.4444	102.247	34.6299	73.913	118.396	134.298	58.6207	123.674	33.9401	59.6491
35	87.5	124.849	46.8683	85.3659	127.335	96.1638	77.7778	119.153	51.5578	76.087	124.658	89.1703	79.5455	78.9207	44.2611	89.7436	91.8202	28.9347	49.2958	92.6	37.2	67.3077	97.0746	105.322	83.3333	118.091	45.4373	71.4286	113.8	71.728				97.2222	99.1372	107.565	92.1053	113.002	51.6073	97.2222	100.542	27.5236	76.087	119.34	141.207	60.3448	116.534	30.2657	61.4035
36	90	120.684	40.8712	87.8049	128.365	80.5653	80	124.859	47.0666	78.2609	129.875	74.3975	81.8182	71.8555	38.1175	92.3077	86.0956	24.1182	50.7042	92.7915	37.7519	69.2308	97.0437	106.978	85.7143	116.052	37.1589	73.4694	115.408	84.7185				100	95.2137	104.142	94.7368	106.255	50.3936	100	101.922	28.282	78.2609	121.483	141.072	62.069	116.468	32.0754	63.1579
37	92.5	121.043	41.7605	90.2439	125.987	69.8799	82.2222	131.188	41.5966	80.4348	133.556	62.3076	84.0909	69.4603	34.2387	94.8718	86.5846	19.547	52.1127	95.4599	41.0664	71.1538	93.6794	106.182	88.0952	114.465	39.4721	75.5102	117.437	93.7304							97.3684	100.327	38.4991				80.4348	122.936	145.668	63.7931	116.549	30.7766	64.9123
38	95	119.132	39.4	92.6829	127.192	60.9333	84.4444	138.018	35.4733	82.6087	134.723	53.1106	86.3636	70.5596	30.772	97.4359	87.052	18.6401	53.5211	97.1775	38.0626	73.0769	94.493	106.233	90.4762	116.686	38.9901	77.551	120.322	96.0875							100	100	40.8558				82.6087	120.716	128.566	65.5172	111.002	35.879	66.6667
39	97.5	112.612	34.2078	95.122	127.256	56.0751	86.6667	139.699	35.1824	84.7826	136.921	47.0996	88.6364	72.6613	32.5354	100	79.2034	17.3883	54.9296	98.8571	35.4033	75	95.0194	89.714	92.8571	116.824	35.0487	79.5918	119.497	90.7031													84.7826	116.817	111.432	67.2414	105.928	46.2508	68.4211
40	100	108.499	35.5943	97.561	123.311	53.7688	88.8889	138.691	33.1509	86.9565	139.451	46.8934	90.9091	69.9774	30.3101				56.338	99.6001	45.2833	76.9231	96.1501	82.2985	95.2381	114.668	28.4395	81.6327	122.921	78.5947													86.9565	118.316	90.9784	68.9655	101.223	53.6608	70.1754
41				100	119.254	45.6362	91.1111	139.454	27.427	89.1304	140.705	44.6436	93.1818	70.8211	28.8448				57.7465	99.4781	47.5233	78.8462	96.0856	66.8615	97.619	112.933	24.9897	83.6735	124.843	78.3933													89.1304	121.537	73.4928	70.6897	100.86	60.7673	71.9298
42							93.3333	139.451	25.8486	91.3043	139.026	38.8986	95.4545	68.8988	25.8268				59.1549	99.8065	44.8319	80.7692	95.9634	55.8497	100	109.839	25.159	85.7143	128.77	81.5283													91.3043	122.735	74.2076	72.4138	100.142	69.9584	73.6842
43							95.5556	134.511	26.1881	93.4783	135.777	32.5399	97.7273	67.5655	26.0401				60.5634	100.216	45.7325	82.6923	97.0871	52.0042				87.7551	129.409	80.7094													93.4783	127.533	90.6586	74.1379	103.193	66.9835	75.4386
44							97.7778	128.537	24.1646	95.6522	135.015	34.8786	100	63.0186	23.602				61.9718	100.295	59.6201	84.6154	98.0861	48.59				89.7959	128.016	72.4889													95.6522	127.614	84.5261	75.8621	106.186	63.3176	77.193
45							100	118.911	24.0551	97.8261	130.478	32.2691							63.3803	99.07	70.1985	86.5385	100.178	47.9362				91.8367	128.434	58.8213													97.8261	128.443	86.1056	77.5862	109.643	51.4931	78.9474
46										100	124.469	28.0878							64.7887	96.52	83.6047	88.4615	96.4454	47.7974				93.8776	130.968	51.1606													100	127.145	89.0938	79.3103	116.405	48.6221	80.7018
47																			66.1972	93.4197	102.019	90.3846	93.9415	45.6686				95.9184	130.03	46.3693																81.0345	122.078	46.0506	82.4561
48																			67.6056	90.4873	122.992	92.3077	93.0604	41.7573				97.9592	129.445	42.9958																82.7586	125.9	43.8058	84.2105
49																			69.0141	88.8093	143.069	94.2308	95.9922	38.6112				100	124.035	39.8763																84.4828	130.824	38.9169	85.9649
50																			70.4225	86.9549	147.679	96.1538	97.6503	36.6442																						86.2069	133.882	39.1654	87.7193
51																			71.831	88.9982	135.815	98.0769	98.3754	38.5482																						87.931	132.728	38.7791	89.4737
52																			73.2394	88.9786	133.917	100	96.0614	36.2968																						89.6552	130.444	36.016	91.2281
53																			74.6479	87.5894	131.684																									91.3793	129.021	31.0211	92.9825
54																			76.0563	89.1132	129.614																									93.1034	128.601	30.7353	94.7368
55																			77.4648	89.6706	145.979																									94.8276	128.962	32.7629	96.4912
56																			78.8732	91.8485	153.562																									96.5517	126.795	32.4074	98.2456
57																			80.2817	90.6556	153.049																									98.2759	124.625	38.0787	100
58																			81.6901	88.3471	151.113																									100	122.111	35.1265
59																			83.0986	85.7968	136.549
60																			84.507	85.1976	142.409
61																			85.9155	84.9213	114.81
62																			87.3239	84.9613	98.1401
63																			88.7324	86.2898	78.0195
64																			90.1408	88.0011	66.9308
65																			91.5493	89.0694	57.4046
66																			92.9577	88.7224	55.5636
67																			94.3662	88.5406	47.2842
68																			95.7746	90.5552	46.816
69																			97.1831	90.8014	44.4547
70																			98.5915	88.8812	43.0376
71																			100	87.0806	43.6258
72
73
74
75
76
77
78
79
80
81
82
83
84
85
86
87
88
89
90
91
92
	0			0			0			0			0			0			0			0			0			0			0			0			0			0			0			0			0
	5	121.648	28.9757	5	211.308	38.9132	5	99.5831	17.1715	5	123.209	21.9007	5	75.7615	8.66527	5	77.23	13.5854	5	105.083	31.6942	5	85.645	30.7051	5	117.296	19.5027	5	152.887	28.9359	5	139.398	35.9862	5	100.993	75.7448	5	103.542	39.9204	5	125.592	28.8753	5	137.763	45.1783	5	150.632	29.5022	5
	10	127.009	32.6072	10	198.818	42.13	10	93.7646	19.5892	10	121.24	20.8444	10	79.8194	9.75045	10	80.2361	11.3919	10	101.421	31.5069	10	88.2871	27.9604	10	115.592	19.3798	10	139.603	26.0273	10	138.742	34.9586	10	108.206	67.1885	10	103.029	39.1973	10	131.787	21.8354	10	134.724	46.225	10	143.967	29.1868	10
	15	139.913	31.8629	15	182.801	38.7345	15	94.0968	19.4629	15	121.227	22.645	15	77.8525	8.89435	15	80.0323	12.3698	15	98.8021	33.3406	15	92.6539	25.3821	15	112.26	20.1164	15	131.725	33.0521	15	133.345	37.3562	15	114.485	65.3149	15	106.187	39.2735	15	135.738	22.9804	15	136.426	51.319	15	131.614	31.5573	15
	20	144.947	33.4934	20	170.41	42.8619	20	102.693	19.6036	20	125.645	23.4259	20	77.0558	11.1989	20	82.1804	12.172	20	103.736	31.015	20	97.9443	26.3087	20	115.864	23.5992	20	121.958	25.0693	20	127.009	39.2993	20	120.666	65.245	20	110.712	40.0984	20	135.595	27.3941	20	134.433	40.753	20	121.955	34.0605	20
	25	144.475	33.3309	25	169.845	42.0598	25	113.404	19.3117	25	133.586	21.8535	25	77.4818	9.04233	25	87.9475	14.3011	25	105.378	36.4058	25	109.722	24.7641	25	116.758	26.1565	25	121.421	23.3635	25	118.839	41.357	25	113.754	63.4429	25	112.096	38.3391	25	133.649	26.04	25	130.285	37.0852	25	119.668	35.4586	25
	30	136.502	31.8111	30	166.083	39.864	30	133.063	19.448	30	136.058	23.6362	30	80.9487	9.7959	30	89.9222	15.6862	30	106.145	35.4636	30	119.656	26.709	30	114.547	23.9957	30	122.396	24.0372	30	112.481	45.0496	30	108.975	63.0784	30	116.259	48.3258	30	135.195	26.4985	30	133.566	35.9881	30	111.768	29.6513	30
	35	126.158	34.7207	35	163.177	40.0044	35	131.367	20.6737	35	129.346	24.6359	35	84.4581	10.6479	35	92.455	15.0793	35	105.2	31.756	35	124.433	23.6866	35	113.437	29.1666	35	119.341	23.4114	35	108.674	44.3164	35	102.839	66.9427	35	115.583	47.2553	35	130.931	28.2003	35	136.357	40.6369	35	112.924	26.1413	35
	40	119.49	35.1113	40	158.465	39.4398	40	126.303	21.7569	40	128.565	23.6989	40	84.7638	11.0735	40	88.3818	18.3212	40	103.85	32.9	40	121.626	26.0758	40	115.466	26.4378	40	114.72	26.297	40	110.051	54.0427	40	98.7826	69.9607	40	112.116	43.8898	40	119.968	25.2664	40	133.933	41.4058	40	111.623	25.8103	40
	45	114.62	40.1464	45	155.517	43.0759	45	126.505	24.5005	45	127.547	29.0886	45	81.7015	12.7122	45	84.8702	23.0821	45	98.1333	35.4	45	116.896	27.9619	45	120.321	27.1181	45	111.062	24.371	45	111.142	71.4898	45	94.627	71.1036	45	107.435	46.4634	45	111.747	27.4197	45	130.09	41.1942	45	107.176	25.9424	45
	50	114.161	51.1667	50	146.443	50.0112	50	122.564	28.6784	50	126.134	35.8635	50	84.1624	14.2442	50	88.1352	34.2378	50	93.6	36.05	50	115.146	28.0302	50	123.619	28.1724	50	103.586	29.7158	50	109.811	96.2122	50	94.1004	72.7363	50	103.112	58.8022	50	107.886	34.7536	50	131.107	43.8038	50	111.206	28.5697	50
	55	115.273	69.3159	55	136.573	57.909	55	120.229	35.8332	55	124.543	48.651	55	86.8034	16.7252	55	90.3303	39.8368	55	96.0715	38.071	55	116.363	30.8919	55	116.829	34.269	55	104.136	32.2531	55	110.112	115.884	55	93.0301	69.0271	55	100.01	61.0344	55	104.126	36.2755	55	134.01	53.1984	55	116.519	27.002	55
	60	112.996	95.7115	60	120.057	68.2998	60	117.778	45.1941	60	124.642	58.2778	60	84.2434	26.5712	60	86.1274	50.5152	60	99.6282	45.8795	60	115.333	49.9349	60	108.493	34.9704	60	109.453	38.4563	60	109.475	121.454	60	93.1239	83.0754	60	96.2434	82.8502	60	101.328	41.1513	60	133.261	59.6683	60	121.483	31.5555	60
	65	103.649	119.733	65	105.377	107.458	65	115.797	58.0849	65	128.111	84.93	65	84.0875	39.2615	65	82.8478	62.0714	65	99.0253	64.7889	65	110.737	81.2146	65	109.597	42.2322	65	114.395	42.9609	65	106.681	138.199	65	94.7236	99.9761	65	93.162	138.4	65	93.945	48.7507	65	125.056	73.3975	65	116.517	31.0392	65
	70	96.3693	130.891	70	100.197	156.548	70	115.19	74.3031	70	124.404	102.151	70	84.2198	41.6038	70	80.4209	75.964	70	90.9054	122.693	70	98.9903	102.336	70	109.911	51.9209	70	113.487	52.2891	70	102.478	146.119	70	89.1663	132.712	70	99.9011	147.385	70	86.9892	47.968	70	124.416	109.192	70	106.051	45.2635	70
	75	101.583	100.418	75	106.667	164.591	75	111.063	63.8368	75	117.782	99.6336	75	76.417	44.9465	75	78.9222	78.1067	75	88.1303	137.274	75	94.3973	100.71	75	112.739	54.7794	75	114.604	78.2233	75	104.651	149.361	75	79.9575	200.778	75	110.725	135.2	75	89.6593	51.2918	75	118.926	133.918	75	101.398	65.9031	75
	80	115.325	65.7124	80	118.67	151.49	80	118.882	51.6143	80	127.266	81.7839	80	77.789	46.7403	80	84.1001	61.0217	80	90.2108	143.052	80	95.7517	79.6247	80	117.187	54.9163	80	119.085	93.507	80	112.012	125.834	80	79.0374	220.177	80	115.132	97.907	80	92.3411	51.188	80	120.412	141.14	80	110.745	54.4776	80
	85	124.214	51.2626	85	125.64	127.643	85	131.355	41.3788	85	135.067	54.1726	85	70.6579	36.1781	85	90.513	40.4571	85	87.4993	145.78	85	97.0455	52.148	85	119.102	43.0857	85	123.882	78.494	85	119.677	98.8599	85	84.6678	186.311	85	118.319	64.6595	85	101.127	50.0302	85	120.156	128.556	85	126.267	42.9244	85
	90	123.534	44.4113	90	127.85	88.3645	90	139.195	34.1667	90	140.078	45.7685	90	71.6105	31.6537	90	91.778	29.9772	90	85.3908	96.9899	90	98.3118	47.8668	90	115.259	38.3155	90	128.731	78.2422	90	125.334	83.4318	90	94.7338	140.492	90	116.209	59.1909	90	104.651	36.5016	90	119.927	82.2356	90	132.351	37.9868	90
	95	120.286	40.6772	95	126.589	65.4066	95	139.452	26.6378	95	137.401	35.7193	95	70.3992	29.5774	95	86.3401	21.8326	95	88.5834	56.7958	95	94.3314	42.0124	95	116.755	37.0194	95	129.701	54.9909	95	125.022	67.6903	95	100.51	124.212	95	109.628	51.0005	95	102.465	34.8803	95	125.134	82.4331	95	128.861	31.5064	95
	100	113.414	36.4007	100	123.273	51.8267	100	127.319	24.8026	100	129.987	31.7452	100	66.4943	25.1563	100	83.1277	18.0142	100	89.3296	44.4835	100	97.3624	37.1631	100	112.48	26.1961	100	127.837	43.0805	100	120.912	54.9317	100	97.1755	105.853	100	100.164	39.6775	100	101.232	27.9028	100	127.734	86.5752	100	124.511	35.2042	100
[truncated: 40 more columns]

## Sheet: Summary
% Chromosome Length		Mean	STDDEV	SEM		Mean	STDDEV	SEM
0-5	GFP	115.693	31.4232	6.0474	FISH	29.5633	14.9701	2.881
5-10		117.019	27.1128	5.21785		29.4347	14.622	2.81401
10-15		117.634	25.1581	4.84169		29.8023	14.322	2.75627
15-20		118.121	22.2524	4.28248		29.5712	13.9773	2.68993
20-25		118.694	20.5948	3.96347		29.9903	14.4506	2.78102
25-30		117.836	19.9748	3.84416		30.7647	12.9181	2.48609
30-35		117.273	20.1155	3.87123		32.038	13.0274	2.50712
35-40		116.734	21.6032	4.15754		32.4573	13.8836	2.6719
40-45		116.009	25.6709	4.94036		35.4277	16.7784	3.229
45-50		115.565	26.0963	5.02224		41.1057	19.4892	3.75069
50-55		114.091	20.9285	4.0277		47.2017	22.6547	4.3599
55-60		110.256	18.7646	3.61125		56.8487	25.8502	4.97488
60-65		105.727	17.172	3.30476		71.4613	31.4826	6.05884
65-70		101.161	15.3069	2.94581		86.2524	35.3851	6.80986
70-75		101.139	15.4186	2.96732		91.0123	41.923	8.06808
75-80		106.845	17.4832	3.36465		84.2828	47.0515	9.05506
80-85		113.743	20.3121	3.90907		70.1842	41.8924	8.0622
85-90		118.663	22.1479	4.26236		56.8042	31.2098	6.00633
90-95		118.946	22.9483	4.4164		46.9479	23.9146	4.60237
95-100		113.587	21.2908	4.09741		40.6631	19.9207	3.83375
