# Supplementary material for: Large domains of heterochromatin direct the formation of short mitotic chromosome loops
Source: eLife. 2020 Sep 11;9:e57212. doi: 10.7554/eLife.57212 (PMC7515631; doi:10.7554/eLife.57212)
Supplement: Figure 2—figure supplement 1—source data 1. [file elife-57212-fig2-figsupp1-data1.xlsx]

## Sheet: Sheet1
		%IP 1 (ChIP 27)	%IP 2 (ChIP 28)	%IP 3 (ChIP29)	Mean %IP	STDEV	SEM		% Sat 1	% Sat 2	% Sat 3	Mean %Sat	STDEV	SEM
-500kb	C127 No Antibody	0.00305842	0.00874288	0.00171101	0.0045041	0.00304733	0.00175938	-500kb	0.000358402	0.00167519	0.000384313	0.000805968	0.000614723	0.00035491	-500kb
	C127 Ab H3K9me3	1.65108	0.983082	0.796616	1.14359	0.366833	0.211791		0.193482	0.188364	0.178929	0.186925	0.00602762	0.00348005
	F1.1 No Antibody	0.000238398	0.00131595	0.000686827	0.000747059	0.000441966	0.000255169		4.0044e-05	0.00025361	0.000324432	0.000206028	0.000120878	6.97887e-05
	F1.1 Ab H3K9me3	0.507817	0.722634	0.331155	0.520535	0.160074	0.0924187		0.0852986	0.139266	0.156425	0.126997	0.0303057	0.017497
-100kb	C127 No Antibody	0.0015825	0.0121036	0.00109691	0.00492768	0.00507803	0.0029318	-100kb	0.000185446	0.00231913	0.000246379	0.000916983	0.000991776	0.000572602	-100kb
	C127 Ab H3K9me3	2.14771	1.71897	1.044	1.63689	0.454308	0.262295		0.25168	0.329364	0.234496	0.271847	0.0412717	0.0238282
	F1.1 No Antibody	0.000741964	0.00410803	0.000513543	0.00178785	0.00164327	0.00094874		0.000124628	0.000791698	0.000242579	0.000386302	0.000290675	0.000167821
	F1.1 Ab H3K9me3	1.09741	1.17959	1.02252	1.09984	0.0641488	0.0370363		0.184333	0.227331	0.482999	0.298221	0.131832	0.0761131
-10kb	C127 No Antibody	0.430498	0.00350514	0.000563027	0.144856	0.201984	0.116615	-10kb	0.0504481	0.000671605	0.000126463	0.017082	0.0235944	0.0136222	-10kb
	C127 Ab H3K9me3	3.13051	2.17141	1.62347	2.30846	0.62283	0.359591		0.366849	0.416055	0.364651	0.382518	0.023731	0.0137011
	F1.1 No Antibody	0.000662974	0.00152119	0.000772257	0.000985475	0.000381428	0.000220218		0.000111361	0.000293164	0.000364786	0.000256437	0.00010667	6.1586e-05
	F1.1 Ab H3K9me3	1.06371	1.26101	0.737123	1.02061	0.216034	0.124727		0.178672	0.24302	0.34819	0.256627	0.0698708	0.0403399
-2kb	C127 No Antibody	0.000607115	0.00471173	0.00090518	0.00207467	0.00186864	0.00107886	-2kb	7.1145e-05	0.000902795	0.000203314	0.000392418	0.000364903	0.000210677	-2kb
	C127 Ab H3K9me3	2.2196	1.78523	1.19305	1.73262	0.420735	0.242911		0.260104	0.34206	0.267973	0.290046	0.0369197	0.0213156
	F1.1 No Antibody	0.000698568	0.00200864	0.00158181	0.00142967	0.000545548	0.000314973		0.000117339	0.000387105	0.00074719	0.000417211	0.000258015	0.000148965
	F1.1 Ab H3K9me3	0.981131	1.1319	0.786322	0.96645	0.141462	0.081673		0.164802	0.218139	0.371429	0.251457	0.0875835	0.0505664
-1kb	C127 No Antibody	0.00155031	0.0102525	0.0012256	0.00434281	0.0041809	0.00241384	-1kb	0.000181674	0.00196444	0.000275285	0.000807134	0.000819234	0.000472985	-1kb
	C127 Ab H3K9me3	1.99051	1.99041	1.70954	1.89682	0.132428	0.0764572		0.233258	0.381374	0.383982	0.332872	0.0704453	0.0406716
	F1.1 No Antibody	0.00139096	0.0048449	0.0020938	0.00277655	0.00149042	0.000860496		0.000233641	0.000933707	0.000989032	0.000718794	0.000343797	0.000198491
	F1.1 Ab H3K9me3	1.13418	1.47869	0.89524	1.16937	0.239486	0.138267		0.19051	0.284972	0.422878	0.299453	0.0954149	0.0550878
0kb	C127 No Antibody	0.00200413	0.00822486	0.00204786	0.00409228	0.00292223	0.00168715	0kb	0.000234854	0.00157593	0.000459973	0.00075692	0.000586376	0.000338545	0kb
	C127 Ab H3K9me3	2.64006	1.9483	1.15464	1.91433	0.606899	0.350393		0.309377	0.373307	0.259345	0.314009	0.0466397	0.0269274
	F1.1 No Antibody	0.000509954	0.00111004	0.001753	0.00112433	0.000507573	0.000293047		8.56576e-05	0.000213927	0.000828054	0.00037588	0.000323995	0.000187059
	F1.1 Ab H3K9me3	1.27026	1.41723	0.747028	1.14484	0.287622	0.166059		0.213368	0.273127	0.352868	0.279788	0.0571454	0.0329929
Rad3	C127 No Antibody	1.56715	2.4334	1.91767	1.97274	0.355781	0.20541	Rad3	0.183647	0.466254	0.430732	0.360211	0.125689	0.0725665	Rad3
	C127 Ab H3K9me3	2.05513	5.47456	2.82352	3.45107	1.46481	0.845708		0.240831	1.04896	0.634195	0.641329	0.329955	0.1905		0
	F1.1 No Antibody	0.0700533	0.0281013	0.00454441	0.034233	0.0270931	0.0156422		0.0117669	0.00541567	0.00214661	0.00644307	0.0039941	0.002306
	F1.1 Ab H3K9me3	3.90105	4.27673	3.02559	3.73446	0.524183	0.302637		0.655263	0.82421	1.42918	0.96955	0.332243	0.191821
Hut1	C127 No Antibody	2.20844	12.195	1.74836	5.38392	4.81979	2.78271	Hut1	0.258797	2.33663	0.392703	0.996042	0.949511	0.5482	Hut1
	C127 Ab H3K9me3	4.51588	17.4351	11.8693	11.2734	5.29106	3.05479		0.529195	3.34067	2.66599	2.17862	1.1984	0.691897		0
	F1.1 No Antibody	0.0602146	0.0155057	0.00720317	0.0276412	0.023281	0.0134413		0.0101143	0.00298826	0.00340251	0.00550169	0.00326599	0.00188562
	F1.1 Ab H3K9me3	3.95727	4.30763	2.66546	3.64345	0.706183	0.407715		0.664707	0.830165	1.25906	0.917979	0.250464	0.144606
Ura4	C127 No Antibody	1.04722	4.98166	0.996322	2.34173	1.86683	1.07781	Ura4	0.122719	0.954516	0.223786	0.433673	0.370595	0.213963	Ura4
	C127 Ab H3K9me3	3.41646	7.11739	1.86778	4.13387	2.20237	1.27154		0.400358	1.36373	0.419525	0.727873	0.44969	0.259629		0
	F1.1 No Antibody	0.00842569	0.0139856	0.0063573	0.00958953	0.00322114	0.00185972		0.00141527	0.0026953	0.00300295	0.00237117	0.000687495	0.000396926
	F1.1 Ab H3K9me3	3.60538	4.75787	3.11143	3.82489	0.689847	0.398283		0.6056	0.916935	1.46972	0.99742	0.357338	0.206309
+1kb	C127 No Antibody	0.00166123	0.00833429	0.00148267	0.00382606	0.00318863	0.00184096	+1kb	0.000194671	0.0015969	0.000333026	0.000708199	0.00063094	0.000364273	+1kb
	C127 Ab H3K9me3	2.97141	2.49479	1.57603	2.34741	0.579118	0.334354		0.348206	0.478018	0.353995	0.393406	0.059876	0.0345694
	F1.1 No Antibody	0.00138636	0.00500408	0.0024522	0.00294755	0.00151789	0.000876355		0.000232869	0.000964384	0.00115833	0.000785194	0.000398498	0.000230073
	F1.1 Ab H3K9me3	1.43206	2.03925	1.23188	1.56773	0.343286	0.198196		0.240545	0.393004	0.581894	0.405148	0.139619	0.0806092
+2kb	C127 No Antibody	0.000195554	0.00613715	0.00169245	0.00267505	0.00252319	0.00145677	+2kb	2.29161e-05	0.00117591	0.000380144	0.000526325	0.000481925	0.00027824	+2kb
	C127 Ab H3K9me3	3.19549	2.54616	1.46242	2.40136	0.714893	0.412743		0.374464	0.48786	0.328477	0.396934	0.0669794	0.0386706
	F1.1 No Antibody	0.000978413	0.0013042	0.00116434	0.00114899	0.000133446	7.7045e-05		0.000164345	0.000251346	0.000549992	0.000321894	0.000165154	9.53515e-05
	F1.1 Ab H3K9me3	1.43106	1.59265	1.1458	1.38983	0.184738	0.106659		0.240376	0.306934	0.541234	0.362848	0.129031	0.0744963
+10kb	C127 No Antibody	0.000861538	0.00607365	0.00296845	0.00330121	0.0021408	0.00123599	+10kb	0.00010096	0.00116375	0.000666749	0.000643818	0.000434184	0.000250676	+10kb
	C127 Ab H3K9me3	1.92593	1.44799	1.36798	1.58063	0.246338	0.142223		0.225691	0.277443	0.307264	0.270132	0.0337009	0.0194572
	F1.1 No Antibody	0.00104056	0.00247281	0.00147039	0.00166125	0.000600091	0.000346462		0.000174783	0.00047656	0.000694557	0.000448633	0.000213114	0.000123041
	F1.1 Ab H3K9me3	0.670663	1.01261	0.625461	0.769576	0.172835	0.0997865		0.112652	0.195149	0.295445	0.201082	0.0747427	0.0431527
+100kb	C127 No Antibody	0.0021772	0.0103834	0.00259231	0.00505098	0.00377442	0.00217916	+100kb	0.000255135	0.00198953	0.000582264	0.000942309	0.000752442	0.000434423	+100kb
	C127 Ab H3K9me3	6.85801	4.14908	3.77639	4.92783	1.3733	0.792873		0.803657	0.794989	0.848223	0.815623	0.0233217	0.0134648
	F1.1 No Antibody	0.0020067	0.00245712	0.0026649	0.00237624	0.000274725	0.000158613		0.000337068	0.000473536	0.0012588	0.000689801	0.000406181	0.000234509
	F1.1 Ab H3K9me3	3.92491	4.46703	2.98126	3.79107	0.613902	0.354436		0.659271	0.860885	1.40824	0.976132	0.316438	0.182696
+500kb	C127 No Antibody	0.00219371	0.00525307	0.000904166	0.00278365	0.00182378	0.00105296	+500kb	0.00025707	0.00100652	0.000203086	0.000488892	0.000366681	0.000211703	+500kb
	C127 Ab H3K9me3	3.45978	2.44003	0.734938	2.21158	1.12408	0.648987		0.405435	0.467524	0.165076	0.346012	0.130428	0.0753024
	F1.1 No Antibody	0.00151376	0.00272719	0.0027143	0.00231842	0.000569003	0.000328514		0.000254268	0.000525584	0.00128213	0.000687329	0.000434932	0.000251108
	F1.1 Ab H3K9me3	1.56104	1.50498	1.201	1.42234	0.158174	0.0913221		0.262209	0.29004	0.567309	0.373186	0.137735	0.0795214
mAct	C127 No Antibody	0.0442335	0.00673329	0.00417337	0.0183801	0.018311	0.0105719	mAct	0.00518352	0.00129014	0.000937389	0.00247035	0.0019239	0.00111076	mAct
	C127 Ab H3K9me3	1.21241	1.32333	1.02254	1.1861	0.124198	0.0717055		0.142077	0.253558	0.229676	0.208437	0.0479258	0.02767
	F1.1 No Antibody	0.00252053	0.000981292	0.00460175	0.00270119	0.00148356	0.000856531		0.000423377	0.000189114	0.0021737	0.000928729	0.000885505	0.000511246
	F1.1 Ab H3K9me3	0.495851	0.936303	0.469614	0.633923	0.214083	0.123601		0.0832886	0.180444	0.221828	0.161854	0.0580661	0.0335245
Sat	C127 No Antibody	0.000758581	0.00407745	0.00127369	0.00203657	0.00145836	0.000841984	Sat	8.88945e-05	0.000781264	0.000286086	0.000385415	0.000291254	0.000168156	Sat
	C127 Ab H3K9me3	8.5335	5.21904	4.45212	6.06822	1.77111	1.02255		1	1	1	1	0	0
	F1.1 No Antibody	0.00142664	0.00193005	0.00100427	0.00145365	0.000378432	0.000218488		0.000239634	0.000371958	0.000474378	0.00036199	9.60929e-05	5.54792e-05
	F1.1 Ab H3K9me3	5.95341	5.18889	2.11702	4.41977	1.65794	0.95721		1	1	1	1	0	0
