# Supplementary material for: Large domains of heterochromatin direct the formation of short mitotic chromosome loops
Source: eLife. 2020 Sep 11;9:e57212. doi: 10.7554/eLife.57212 (PMC7515631; doi:10.7554/eLife.57212)
Supplement: Figure 2—source data 1. [file elife-57212-fig2-data1.xlsx]

## Sheet: H3K9me3
		%IP 1 (ChIP 20)	%IP 2 (ChIP 21)	%IP 3 (ChIP22)	Mean %IP	STDEV	SEM		% Sat 1	% Sat 2	% Sat 3	Mean %Sat	STDEV	SEM
Rad3	No Antibody	0.00102626	0.00159911	0.0115905	0.00473862	0.00485064	0.00280052		0.000195448	0.00198734	0.00922463	0.00380247	0.00390321	0.00225352
	H3K9me3	5.1907	0.556831	1.03253	2.26002	2.08138	1.20169		0.988547	0.69202	0.82177	0.834112	0.121371	0.0700733
Mac1	No Antibody	0.000674839	1.25875e-05	0.0060986	0.00226201	0.00272632	0.00157404		0.00012852	1.56436e-05	0.00485376	0.00166597	0.00225457	0.00130168
	H3K9me3	3.7602	1.01453	1.50275	2.0925	1.19597	0.690496		0.716115	1.26084	1.19601	1.05766	0.242951	0.140268
ChrI_Inter	No Antibody	0.0185032	0.00992897	0.0172928	0.0152417	0.003789	0.00218758		0.00352386	0.0123396	0.013763	0.00987546	0.00452869	0.00261464
	H3K9me3	3.99577	0.812431	0.86228	1.89016	1.48903	0.859692		0.760978	1.00968	0.686271	0.818975	0.138252	0.0798198
Hut1	No Antibody	0.024692	0.000369391	0.0124752	0.0125122	0.00992971	0.00573292		0.0047025	0.000459073	0.00992876	0.00503011	0.00387292	0.00223603
	H3K9me3	4.39842	0.831323	1.09944	2.10973	1.62205	0.936491		0.837662	1.03315	0.875023	0.915279	0.0847337	0.048921
Pol5	No Antibody	0.0124674	2.89551e-05	0.0123696	0.00828864	0.00584062	0.00337208		0.00237436	3.59849e-05	0.0098447	0.00408502	0.0041831	0.00241511
	H3K9me3	3.78144	0.680421	1.03659	1.83282	1.38553	0.799939		0.72016	0.845615	0.825005	0.796927	0.0549308	0.0317143
Pcn1	No Antibody	0.0150365	0.0100917	0.00918941	0.0114392	0.00257022	0.00148391		0.00286364	0.0125418	0.00731366	0.00757305	0.00395536	0.00228363
	H3K9me3	2.9062	0.92398	0.740021	1.5234	0.980668	0.566189		0.553474	1.14831	0.588968	0.763583	0.272427	0.157286
Ura4	No Antibody	0.0681994	0.0407389	0.0470968	0.0520117	0.0117371	0.00677639		0.0129883	0.0506296	0.0374834	0.0337004	0.0155981	0.00900555
	H3K9me3	3.88364	1.08112	1.26275	2.07584	1.28046	0.739272		0.739623	1.3436	1.005	1.02941	0.247177	0.142708
Omh3	No Antibody	0.000131984	4.78141e-05	0.0124733	0.0042177	0.00583769	0.00337039		2.51358e-05	5.94226e-05	0.00992725	0.00333727	0.00465984	0.00269036
	H3K9me3	5.39978	0.976393	1.0651	2.48042	2.06462	1.19201		1.02837	1.21344	0.84769	1.02983	0.149322	0.0862112
Mpg1	No Antibody	0.0173004	0.00601914	0.0136193	0.0123129	0.00469727	0.00271197		0.00329478	0.00748048	0.0108393	0.00720487	0.00308621	0.00178182
	H3K9me3	6.13758	1.95966	1.3305	3.14258	2.1333	1.23166		1.16888	2.43544	1.05892	1.55441	0.624594	0.360609
ChrI_LTR	No Antibody	6.6807e-05	0.00652973	0.0149946	0.00719704	0.00611248	0.00352904		1.27231e-05	0.00811504	0.0119339	0.00668722	0.00497042	0.00286967
	H3K9me3	3.9335	0.838317	1.07059	1.94747	1.40753	0.81264		0.749119	1.04185	0.852061	0.881009	0.121246	0.0700015
ChrII_LTR	No Antibody	0.0384854	0.0098395	0.0055329	0.0179526	0.014625	0.00844373		0.00732939	0.0122284	0.00440352	0.00798709	0.00322815	0.00186377
	H3K9me3	3.26112	0.783092	0.927687	1.6573	1.13561	0.655643		0.621067	0.973214	0.738328	0.777536	0.146412	0.0845312
ChrIII_LTR	No Antibody	0.00631286	0.000219323	0.0111301	0.00588743	0.00446446	0.00257755		0.00120226	0.000272571	0.00885823	0.00344435	0.00384696	0.00222104
	H3K9me3	3.9932	1.08274	1.34161	2.13918	1.31524	0.759356		0.760489	1.34561	1.06776	1.05795	0.238976	0.137973
NeoS	No Antibody	0.230652	0.00821627	0.0617544	0.100208	0.0947924	0.0547284		0.0439267	0.010211	0.0491491	0.0344289	0.0172568	0.00996325
	H3K9me3	6.18755	1.35001	1.85479	3.13078	2.17126	1.25358		1.17839	1.67777	1.47619	1.44412	0.205127	0.11843
mAct	No Antibody	0.000519674	3.58961e-05	0.00548687	0.00201415	0.00246352	0.00142231		9.89697e-05	4.46111e-05	0.00436689	0.00150349	0.00202485	0.00116905
	H3K9me3	0.907593	0.184387	0.132693	0.408224	0.353737	0.20423		0.172847	0.229153	0.105608	0.169203	0.0505029	0.0291579
Hoxc8	No Antibody	0.0102022	0.00145034	0.00631074	0.00598777	0.00358024	0.00206705		0.00194297	0.00180246	0.00502259	0.00292268	0.00148597	0.000857928
	H3K9me3	1.53096	0.600951	0.29426	0.808724	0.525822	0.303584		0.291565	0.746852	0.234195	0.424204	0.229346	0.132413
mSat	No Antibody	0.0142343	0.00282398	0.00826307	0.00844044	0.00465992	0.0026904		0.00271086	0.0035096	0.00657641	0.00426562	0.0016662	0.000961978
	H3K9me3	5.25084	0.804646	1.25647	2.43732	1.99799	1.15354		1	1	1	1	0	0

## Sheet: HP1a
		%IP 1 (ChIP 20)	%IP 2 (ChIP 21)	%IP 3 (ChIP22)	Mean %IP	STDEV	SEM		% Sat 1	% Sat 2	% Sat 3	Mean %Sat	STDEV	SEM
Rad3	No Antibody	0.00102626	0.00159911	0.0115905	0.00473862	0.00485064	0.00280052		0.000257698	0.00598494	0.0211333	0.00912531	0.00880697	0.00508471
	HP1	4.35528	0.165592	0.423463	1.64811	1.91715	1.10687		1.09362	0.619756	0.772114	0.828498	0.197522	0.114039
Mac1	No Antibody	0.000674839	1.25875e-05	0.0060986	0.00226201	0.00272632	0.00157404		0.000169454	4.7111e-05	0.0111198	0.00377878	0.00519111	0.00299709
	HP1	2.69738	0.237456	0.446042	1.12696	1.11372	0.643005		0.677322	0.88872	0.813282	0.793108	0.0874739	0.0505031
ChrI_Inter	No Antibody	0.0185032	0.00992897	0.0172928	0.0152417	0.003789	0.00218758		0.00464622	0.0371609	0.0315304	0.0244459	0.0141879	0.00819139
	HP1	5.36543	0.330902	0.280726	1.99235	2.38521	1.3771		1.34728	1.23846	0.511857	1.03253	0.370843	0.214106
Hut1	No Antibody	0.024692	0.000369391	0.0124752	0.0125122	0.00992971	0.00573292		0.00620025	0.00138251	0.0227464	0.0101097	0.00914939	0.00528241
	HP1	4.31823	0.284244	0.400347	1.66761	1.87487	1.08246		1.08432	1.06383	0.729965	0.959373	0.162431	0.0937798
Pol5	No Antibody	0.0124674	2.89551e-05	0.0123696	0.00828864	0.00584062	0.00337208		0.0031306	0.00010837	0.0225539	0.00859761	0.00994539	0.00574197
	HP1	3.56785	0.242592	0.433742	1.41473	1.52449	0.880162		0.895899	0.907942	0.790856	0.864899	0.0525869	0.030361
Pcn1	No Antibody	0.0150365	0.0100917	0.00918941	0.0114392	0.00257022	0.00148391		0.00377572	0.0377701	0.0167553	0.0194337	0.0140068	0.00808681
	HP1	3.5338	0.314264	0.320856	1.38964	1.51615	0.87535		0.887347	1.17619	0.585027	0.882855	0.241362	0.13935
Ura4	No Antibody	0.0681994	0.0407389	0.0470968	0.0520117	0.0117371	0.00677639		0.0171251	0.152472	0.0858731	0.0851568	0.0552576	0.031903
	HP1	2.94998	0.298297	0.499776	1.24935	1.20534	0.695901		0.740749	1.11643	0.911257	0.922811	0.153587	0.0886738
Omh3	No Antibody	0.000131984	4.78141e-05	0.0124733	0.0042177	0.00583769	0.00337039		3.31416e-05	0.000178953	0.022743	0.00765169	0.0106713	0.00616109
	HP1	5.35214	0.260338	0.334161	1.98221	2.38309	1.37588		1.34394	0.974359	0.609287	0.975862	0.299923	0.17316
Mpg1	No Antibody	0.0173004	0.00601914	0.0136193	0.0123129	0.00469727	0.00271197		0.00434418	0.0225277	0.0248325	0.0172348	0.00916348	0.00529054
	HP1	3.58704	0.258586	0.405706	1.41711	1.53555	0.886549		0.900718	0.967802	0.739737	0.869419	0.0957013	0.0552531
ChrI_LTR	No Antibody	6.6807e-05	0.00652973	0.0149946	0.00719704	0.00611248	0.00352904		1.67754e-05	0.0244387	0.0273401	0.0172652	0.0122538	0.00707476
	HP1	4.55197	0.315022	0.347565	1.73819	1.98969	1.14875		1.14302	1.17903	0.633727	0.985256	0.249003	0.143762
ChrII_LTR	No Antibody	0.0384854	0.0098395	0.0055329	0.0179526	0.014625	0.00844373		0.00966381	0.036826	0.0100883	0.0188594	0.0127055	0.00733554
	HP1	2.70356	0.210592	0.331849	1.082	1.14768	0.662615		0.678872	0.788176	0.605072	0.690707	0.0752188	0.0434276
ChrIII_LTR	No Antibody	0.00631286	0.000219323	0.0111301	0.00588743	0.00446446	0.00257755		0.00158518	0.000820854	0.0202939	0.00756664	0.00900493	0.005199
	HP1	3.07911	0.348945	0.436871	1.28831	1.26679	0.731384		0.773173	1.30599	0.79656	0.958574	0.245844	0.141938
NeoS	No Antibody	0.230652	0.00821627	0.0617544	0.100208	0.0947924	0.0547284		0.0579175	0.0307508	0.112599	0.067089	0.0340378	0.0196517
	HP1	13.8686	0.33488	0.53897	4.91415	6.3323	3.65595		3.48245	1.25335	0.982721	1.90617	1.12006	0.646665
mAct	No Antibody	0.000519674	3.58961e-05	0.00548687	0.00201415	0.00246352	0.00142231		0.000130492	0.000134348	0.0100044	0.00342307	0.00465369	0.00268681
	HP1	1.41372	0.0938356	0.143861	0.550472	0.610749	0.352616		0.354989	0.351196	0.262306	0.322831	0.0428251	0.0247251
Hoxc8	No Antibody	0.0102022	0.00145034	0.00631074	0.00598777	0.00358024	0.00206705		0.00256181	0.00542815	0.0115066	0.00649885	0.00372934	0.00215314
	HP1	2.65457	0.183527	0.336336	1.05814	1.13057	0.652732		0.666571	0.686881	0.613252	0.655568	0.0310494	0.0179264
mSat	No Antibody	0.0142343	0.00282398	0.00826307	0.00844044	0.00465992	0.0026904		0.00357427	0.0105692	0.0150663	0.00973661	0.00472841	0.00272995
	HP1	3.98243	0.267189	0.548446	1.59935	1.68899	0.975141		1	1	1	1	0	0

## Sheet: H3K4me3
		%IP 1 (ChIP 24)	%IP 3 (ChIP25)	%IP 4 (ChIP26)	Mean %IP	STDEV	SEM		% Act 1	% Act 2	% Act 3	Mean %Act	STDEV	SEM
Rad3	No Antibody	0.111445	0.00809154	0.0101709	0.0432357	0.0482385	0.0278505		0.00545169	0.00211234	0.000916944	0.00282699	0.00191903	0.00110795
	H3K4me3	0.232396	0.0282666	0.10201	0.120891	0.0843983	0.0487274		0.0113684	0.00737916	0.00919655	0.00931472	0.00163076	0.000941522
Mac1	No Antibody	0.0795226	0.00389915	0.00640469	0.0299422	0.0350736	0.0202498		0.00389012	0.0010179	0.000577404	0.00182847	0.00146885	0.000848042
	H3K4me3	0.235863	0.0373663	0.0907356	0.121322	0.0838724	0.0484237		0.011538	0.00975469	0.00818011	0.00982428	0.00137175	0.000791978
ChrI_Inter	No Antibody	0.200139	0.0516679	0.0226885	0.0914984	0.0777261	0.0448752		0.00979047	0.0134882	0.00204544	0.00844138	0.0047679	0.00275275
	H3K4me3	0.272223	0.0374498	0.162469	0.15738	0.0959132	0.0553755		0.0133167	0.00977649	0.0146471	0.0125801	0.0020555	0.00118674
Hut1	No Antibody	0.0924002	0.00306959	0.00661434	0.034028	0.0413007	0.023845		0.00452007	0.000801335	0.000596305	0.00197257	0.0018033	0.00104113
	H3K4me3	0.273418	0.0326832	0.104862	0.136988	0.100871	0.0582377		0.0133751	0.00853215	0.00945363	0.0104536	0.00209979	0.00121231
Pol5	No Antibody	0.121158	0.0366133	0.00445476	0.0540755	0.0492181	0.0284161		0.00592687	0.00955811	0.000401611	0.00529553	0.00376469	0.00217354
	H3K4me3	0.243018	0.0230886	0.0924894	0.119532	0.0917996	0.0530005		0.0118881	0.00602741	0.00833823	0.00875123	0.00241036	0.00139162
Pcn1	No Antibody	0.134149	0.00766818	0.00712336	0.0496469	0.0597525	0.0344981		0.00656235	0.00200182	0.000642194	0.00306879	0.00253191	0.0014618
	H3K4me3	0.223701	0.0288205	0.078051	0.110191	0.0827418	0.047771		0.0109431	0.00752376	0.00703655	0.00850113	0.00173814	0.00100351
Ura4	No Antibody	0.0779805	0.0434297	0.0819018	0.0677707	0.017286	0.00998005		0.00381468	0.0113376	0.00738372	0.00751199	0.00307255	0.00177394
	H3K4me3	0.293281	0.0967532	0.163846	0.184627	0.0815667	0.0470925		0.0143468	0.025258	0.0147713	0.0181254	0.00504649	0.00291359
Omh3	No Antibody	0.123738	0.0144604	0.00487194	0.0476902	0.0539163	0.0311286		0.00605307	0.00377498	0.000439221	0.00342242	0.00230536	0.001331
	H3K4me3	0.264737	0.0357787	0.0758794	0.125465	0.0998314	0.0576377		0.0129505	0.00934025	0.00684078	0.0097105	0.00250798	0.00144798
Mpg1	No Antibody	0.0346778	0.00441721	0.00891737	0.0160041	0.0133315	0.00769694		0.00169638	0.00115314	0.00080393	0.00121782	0.000367201	0.000212004
	H3K4me3	0.227053	0.0288586	0.083604	0.113172	0.0835701	0.0482492		0.0111071	0.00753372	0.00753717	0.00872599	0.00168368	0.000972072
ChrI_LTR	No Antibody	0.0981808	0.00337494	0.00574553	0.0357671	0.0441438	0.0254864		0.00480285	0.000881048	0.000517978	0.00206729	0.00194	0.00112006
	H3K4me3	0.191618	0.034051	0.159423	0.128364	0.0679721	0.0392437		0.00937362	0.0088892	0.0143725	0.0108784	0.00247858	0.00143101
ChrII_LTR	No Antibody	0.0888451	0.00805616	0.00985765	0.0355863	0.0376668	0.021747		0.00434616	0.00210311	0.0008887	0.00244599	0.00143217	0.000826866
	H3K4me3	0.239707	0.0411327	0.109784	0.130208	0.0823439	0.0475413		0.0117261	0.0107379	0.00989738	0.0107871	0.000747368	0.000431493
ChrIII_LTR	No Antibody	0.0396561	0.00297395	0.00350583	0.0153786	0.0171681	0.00991203		0.00193991	0.000776368	0.000316063	0.00101078	0.000683342	0.000394527
	H3K4me3	0.187634	0.0316495	0.107209	0.108831	0.0636908	0.0367719		0.00917876	0.00826228	0.00966527	0.00903543	0.000581667	0.000335825
NeoS	No Antibody	0.022472	0.00491833	0.00249122	0.00996052	0.00890227	0.00513973		0.00109929	0.00128396	0.000224592	0.000869282	0.000462056	0.000266768
	H3K4me3	1.5791	0.281514	0.870521	0.910379	0.530487	0.306277		0.0772471	0.073491	0.0784804	0.0764062	0.00212195	0.00122511
mAct	No Antibody	0.0119589	0.0216183	0.192512	0.0753631	0.0829307	0.0478801		0.000585009	0.00564357	0.0173556	0.0078614	0.00702388	0.00405524
	H3K4me3	20.4422	3.8306	11.0922	11.7883	6.79951	3.9257		1	1	1	1	0	0
Hoxc8	No Antibody	0.0248656	0.000894626	0.00173093	0.00916373	0.0111082	0.0064133		0.00121639	0.000233547	0.000156049	0.000535327	0.000482619	0.00027864
	H3K4me3	0.223204	0.0515247	0.132217	0.135648	0.0701296	0.0404894		0.0109188	0.0134508	0.0119198	0.0120965	0.00104123	0.000601156
mSat	No Antibody	0.0198793	0.00114625	0.00233047	0.00778533	0.00856535	0.00494521		0.000972461	0.000299236	0.0002101	0.000493932	0.000340322	0.000196485
	H3K4me3	0.143055	0.0298564	0.0662458	0.079719	0.0471849	0.0272422		0.00699801	0.0077942	0.00597228	0.0069215	0.000745762	0.000430566

## Sheet: H3K36me3
		%IP 1 (ChIP 24)	%IP 3 (ChIP25)	%IP 4 (ChIP26)	Mean %IP	STDEV	SEM		% Act 1	% Act 2	% Act 3	Mean %Act	STDEV	SEM
Rad3	No Antibody	0.111445	0.00809154	0.0101709	0.0432357	0.0482385	0.0278505		0.0590715	0.00134039	0.000695501	0.0203691	0.027368	0.0158009
	H3K36me3	0.293371	0.254805	1.54329	0.697156	0.598516	0.345553		0.155502	0.0422092	0.105532	0.101081	0.0463584	0.026765
Mac1	No Antibody	0.0795226	0.00389915	0.00640469	0.0299422	0.0350736	0.0202498		0.0421511	0.000645907	0.00043796	0.0144117	0.0196149	0.0113247
	H3K36me3	0.340898	0.23601	0.749574	0.442161	0.221552	0.127913		0.180694	0.0390958	0.0512568	0.0903488	0.0640762	0.0369944
ChrI_Inter	No Antibody	0.200139	0.0516679	0.0226885	0.0914984	0.0777261	0.0448752		0.106084	0.00855895	0.00155147	0.0387315	0.0477113	0.0275461
	H3K36me3	0.392545	0.21761	1.04308	0.551077	0.35515	0.205046		0.208069	0.0360477	0.0713268	0.105148	0.0741879	0.0428324
Hut1	No Antibody	0.0924002	0.00306959	0.00661434	0.034028	0.0413007	0.023845		0.0489769	0.000508487	0.000452297	0.0166459	0.0228615	0.0131991
	H3K36me3	0.412867	0.259802	0.914089	0.528919	0.279433	0.16133		0.218841	0.043037	0.0625065	0.108128	0.0786883	0.0454307
Pol5	No Antibody	0.121158	0.0366133	0.00445476	0.0540755	0.0492181	0.0284161		0.0642202	0.00606511	0.000304622	0.02353	0.0288683	0.0166671
	H3K36me3	0.387719	0.206165	0.651831	0.415238	0.18298	0.105644		0.205511	0.0341518	0.044573	0.0947453	0.0784387	0.0452866
Pcn1	No Antibody	0.134149	0.00766818	0.00712336	0.0496469	0.0597525	0.0344981		0.0711059	0.00127026	0.000487104	0.0242878	0.033107	0.0191143
	H3K36me3	0.354628	0.185545	0.611146	0.383773	0.174969	0.101018		0.187971	0.0307361	0.0417909	0.0868327	0.0716579	0.0413717
Ura4	No Antibody	0.0779805	0.0434297	0.0819018	0.0677707	0.017286	0.00998005		0.0413337	0.00719427	0.00560055	0.0180428	0.016482	0.00951587
	H3K36me3	0.270267	0.524222	1.42142	0.738634	0.493805	0.285099		0.143255	0.086839	0.0971981	0.109097	0.0245207	0.014157
Omh3	No Antibody	0.123738	0.0144604	0.00487194	0.0476902	0.0539163	0.0311286		0.0655876	0.00239541	0.000333149	0.0227721	0.0302869	0.0174861
	H3K36me3	0.322118	0.10016	0.63773	0.353336	0.220569	0.127346		0.170739	0.0165918	0.0436087	0.07698	0.0672091	0.0388032
Mpg1	No Antibody	0.0346778	0.00441721	0.00891737	0.0160041	0.0133315	0.00769694		0.018381	0.000731725	0.00060978	0.00657418	0.00834886	0.00482022
	H3K36me3	0.298772	0.197753	0.721709	0.406078	0.226963	0.131037		0.158364	0.0327585	0.0493514	0.0801581	0.0557136	0.0321663
ChrI_LTR	No Antibody	0.0981808	0.00337494	0.00574553	0.0357671	0.0441438	0.0254864		0.0520409	0.00055907	0.000392886	0.0176643	0.024308	0.0140343
	H3K36me3	0.218299	0.208286	0.689311	0.371965	0.224434	0.129577		0.11571	0.0345032	0.0471359	0.065783	0.0356784	0.0205989
ChrII_LTR	No Antibody	0.0888451	0.00805616	0.00985765	0.0355863	0.0376668	0.021747		0.0470925	0.00133453	0.000674078	0.016367	0.0217279	0.0125446
	H3K36me3	0.185148	0.130613	0.554693	0.290151	0.18838	0.108761		0.0981378	0.0216365	0.0379306	0.0525683	0.032902	0.018996
ChrIII_LTR	No Antibody	0.0396561	0.00297395	0.00350583	0.0153786	0.0171681	0.00991203		0.0210198	0.000492645	0.000239733	0.00725072	0.00973675	0.00562151
	H3K36me3	0.184658	0.202695	0.635363	0.340905	0.208343	0.120287		0.0978783	0.033577	0.0434469	0.0583007	0.0282741	0.0163241
NeoS	No Antibody	0.022472	0.00491833	0.00249122	0.00996052	0.00890227	0.00513973		0.0119113	0.000814737	0.000170353	0.0042988	0.00538929	0.00311151
	H3K36me3	0.422559	0.131672	0.641469	0.398567	0.208814	0.120559		0.223978	0.021812	0.0438645	0.0965514	0.0905528	0.0522807
mAct	No Antibody	0.0119589	0.0216183	0.192512	0.0753631	0.0829307	0.0478801		0.00633883	0.00358113	0.0131642	0.00769473	0.00402805	0.00232559
	H3K36me3	1.88661	6.03671	14.6239	7.51574	5.3041	3.06233		1	1	1	1	0	0
Hoxc8	No Antibody	0.0248656	0.000894626	0.00173093	0.00916373	0.0111082	0.0064133		0.0131801	0.000148198	0.000118363	0.00448221	0.00615033	0.00355089
	H3K36me3	0.501736	0.79692	2.2931	1.19725	0.784196	0.452756		0.265946	0.132012	0.156805	0.184921	0.0581803	0.0335904
mSat	No Antibody	0.0198793	0.00114625	0.00233047	0.00778533	0.00856535	0.00494521		0.010537	0.000189881	0.000159361	0.00362876	0.0048849	0.0028203
	H3K36me3	0.279925	0.1758	0.585642	0.347122	0.173933	0.10042		0.148375	0.0291218	0.0400469	0.0725145	0.0538264	0.0310767

## Sheet: H3K9ac
		%IP 1 (ChIP 23)	%IP 2 (ChIP 24)	%IP 3 (ChIP25)	%IP 4 (ChIP26)	Mean %IP	STDEV	SEM		% act 1	% act 2	% act 3	% act 4	Mean %Act	STDEV	SEM
Rad3	No Antibody	0.00687357	0.111445	0.00809154	0.0101709	0.0341452	0.0446445	0.0223222		0.0003455	0.00336532	0.00105344	0.000542806	0.00132677	0.00120498	0.000602488
	H3K9ac	0.636668	0.712998	0.122066	0.408233	0.469991	0.230054	0.115027		0.0320022	0.0215305	0.0158917	0.0217867	0.0228028	0.00581038	0.00290519
Mac1	No Antibody	0.00377395	0.0795226	0.00389915	0.00640469	0.0234001	0.0324193	0.0162097		0.000189698	0.00240136	0.000507631	0.000341807	0.000860124	0.000896909	0.000448454
	H3K9ac	0.551773	0.719948	0.101623	0.369397	0.435685	0.229278	0.114639		0.0277349	0.0217404	0.0132303	0.0197141	0.0206049	0.0051794	0.0025897
ChrI_Inter	No Antibody	0.0110107	0.200139	0.0516679	0.0226885	0.0713765	0.0758003	0.0379002		0.000553451	0.00604363	0.00672665	0.00121085	0.00363364	0.00277183	0.00138592
	H3K9ac	0.765666	0.566097	0.152394	0.539997	0.506039	0.222053	0.111027		0.0384862	0.0170945	0.0198402	0.0288187	0.0260599	0.00838282	0.00419141
Hut1	No Antibody	0.00521655	0.0924002	0.00306959	0.00661434	0.0268252	0.0378808	0.0189404		0.00026221	0.00279022	0.00039963	0.000352996	0.000951265	0.00106287	0.000531437
	H3K9ac	0.572582	0.898097	0.124548	0.504068	0.524824	0.274893	0.137447		0.0287809	0.02712	0.0162149	0.0269012	0.0247543	0.00498348	0.00249174
Pol5	No Antibody	0.00765436	0.121158	0.0366133	0.00445476	0.0424702	0.047126	0.023563		0.000384747	0.00365864	0.00476669	0.000237743	0.00226195	0.00199034	0.000995168
	H3K9ac	0.61759	0.860174	0.114475	0.340103	0.483085	0.281338	0.140669		0.0310432	0.0259748	0.0149036	0.0181507	0.0225181	0.00635768	0.00317884
Pcn1	No Antibody	0.00207914	0.134149	0.00766818	0.00712336	0.0377549	0.0556958	0.0278479		0.000104508	0.00405092	0.000998321	0.000380161	0.00138348	0.00157369	0.000786846
	H3K9ac	0.559944	0.766622	0.112347	0.319435	0.439587	0.246455	0.123227		0.0281456	0.0231498	0.0146265	0.0170477	0.0207424	0.00528343	0.00264171
Ura4	No Antibody	0.0351845	0.0779805	0.0434297	0.0819018	0.0596241	0.0205719	0.0102859		0.00176855	0.00235479	0.00565412	0.00437096	0.00353711	0.00155746	0.000778729
	H3K9ac	0.569863	0.66126	0.159451	0.3998	0.447594	0.190993	0.0954966		0.0286442	0.0199682	0.0207589	0.0213367	0.022677	0.00347925	0.00173962
Omh3	No Antibody	9.36018e-05	0.123738	0.0144604	0.00487194	0.035791	0.0510392	0.0255196		4.7049e-06	0.00373654	0.0018826	0.000260007	0.00147096	0.0014932	0.000746602
	H3K9ac	0.611616	0.850938	0.120933	0.282616	0.466525	0.283761	0.14188		0.0307429	0.0256959	0.0157442	0.0150827	0.0218164	0.00665106	0.00332553
Mpg1	No Antibody	0.00225769	0.0346778	0.00441721	0.00891737	0.0125675	0.0129895	0.00649475		0.000113483	0.00104717	0.000575078	0.000475905	0.000552909	0.000333096	0.000166548
	H3K9ac	0.582466	0.654488	0.138027	0.36977	0.436187	0.201472	0.100736		0.0292777	0.0197637	0.0179697	0.019734	0.0216863	0.00444269	0.00222134
ChrI_LTR	No Antibody	0.00190381	0.0981808	0.00337494	0.00574553	0.0273013	0.0409453	0.0204726		9.56951e-05	0.00296478	0.000439384	0.000306629	0.000951623	0.00116874	0.000584371
	H3K9ac	0.634216	0.749756	0.115245	0.350765	0.462495	0.247524	0.123762		0.0318789	0.0226405	0.0150037	0.0187197	0.0220607	0.00627887	0.00313943
ChrII_LTR	No Antibody	5.37341e-05	0.0888451	0.00805616	0.00985765	0.0267032	0.0360669	0.0180335		2.70095e-06	0.00268287	0.00104883	0.000526086	0.00106512	0.00100457	0.000502287
	H3K9ac	0.519342	0.924317	0.133987	0.311722	0.472342	0.294437	0.147219		0.0261047	0.0279118	0.0174438	0.0166361	0.0220241	0.00503304	0.00251652
ChrIII_LTR	No Antibody	0.000109091	0.0396561	0.00297395	0.00350583	0.0115612	0.0162719	0.00813597		5.48345e-06	0.0011975	0.000387179	0.0001871	0.000444316	0.000455326	0.000227663
	H3K9ac	0.474684	0.684722	0.146481	0.3646	0.417622	0.194247	0.0971234		0.02386	0.0206767	0.0190704	0.0194581	0.0207663	0.00188194	0.000940972
NeoP	No Antibody	0.525354	0.022472	0.00491833	0.00249122	0.138809	0.223305	0.111652		0.0264069	0.000678591	0.000640318	0.000132952	0.0069647	0.011227	0.00561352
	H3K9ac	3.41777	2.28713	0.337699	0.96366	1.75157	1.19194	0.595969		0.171794	0.069065	0.0439651	0.0514289	0.0840633	0.0514649	0.0257324
mAct	No Antibody	0.000104433	0.0119589	0.0216183	0.192512	0.0565484	0.0788676	0.0394338		5.24931e-06	0.000361125	0.00281448	0.010274	0.00336373	0.00413368	0.00206684
	H3K9ac	19.8945	33.1157	7.68108	18.7377	19.8573	9.01803	4.50902		1	1	1	1	1	0	0
Hoxc8	No Antibody	3.75916e-05	0.0248656	0.000894626	0.00173093	0.00688219	0.0104	0.00519999		1.88954e-06	0.000750872	0.000116471	9.23769e-05	0.000240402	0.000297799	0.0001489
	H3K9ac	0.847593	1.29616	0.282117	0.524057	0.737482	0.379854	0.189927		0.0426043	0.0391404	0.0367289	0.027968	0.0366104	0.00540908	0.00270454
mSat	No Antibody	0.000913489	0.0198793	0.00114625	0.00233047	0.00606737	0.00799238	0.00399619		4.59166e-05	0.000600297	0.000149231	0.000124373	0.000229955	0.000217191	0.000108595
	H3K9ac	0.421686	0.570932	0.120235	0.229778	0.335658	0.173473	0.0867366		0.0211961	0.0172405	0.0156535	0.0122629	0.0165882	0.00321092	0.00160546

## Sheet: H3K27ac
		%IP 1 (ChIP 23)	%IP 2 (ChIP25)	%IP 3 (ChIP26)	Mean %IP	STDEV	SEM		% Act 1	% Act 2	% Act 3	Mean %Act	STDEV	SEM
Rad3	No Antibody	0.00687357	0.00809154	0.0101709	0.00837868	0.00136137	0.000785988		0.00016559	0.000350091	0.000116388	0.00021069	0.000100597	5.808e-05
	H3K27ac	4.22292	0.926447	4.3806	3.17665	1.59244	0.919395		0.101734	0.0400839	0.0501281	0.0639818	0.0270076	0.0155928
Mac1	No Antibody	0.00377395	0.00389915	0.00640469	0.0046926	0.00121171	0.000699582		9.09174e-05	0.000168702	7.32902e-05	0.00011097	4.14521e-05	2.39324e-05
	H3K27ac	4.20275	0.853217	4.11535	3.0571	1.55879	0.899969		0.101248	0.0369155	0.0470928	0.061752	0.028235	0.0163015
ChrI_Inter	No Antibody	0.0110107	0.0516679	0.0226885	0.0284557	0.0170919	0.009868		0.000265256	0.00223548	0.000259629	0.000920122	0.000930102	0.000536994
	H3K27ac	3.74023	0.811454	5.7667	3.43946	2.03412	1.1744		0.0901051	0.0351086	0.0659895	0.0637344	0.0225088	0.0129954
Hut1	No Antibody	0.00521655	0.00306959	0.00661434	0.00496683	0.00145787	0.000841703		0.000125671	0.00013281	7.56893e-05	0.00011139	2.54119e-05	1.46715e-05
	H3K27ac	3.63548	0.875143	4.81762	3.10941	1.65194	0.953746		0.0875816	0.0378642	0.055129	0.0601916	0.0206103	0.0118994
Pol5	No Antibody	0.00765436	0.0366133	0.00445476	0.0162408	0.0144646	0.00835116		0.0001844	0.00158412	5.09767e-05	0.000606499	0.000693426	0.00040035
	H3K27ac	4.05073	0.809277	4.27105	3.04369	1.58252	0.913671		0.0975854	0.0350144	0.0488746	0.0604915	0.0268328	0.0154919
Pcn1	No Antibody	0.00207914	0.00766818	0.00712336	0.00562356	0.00251614	0.00145269		5.00881e-05	0.000331774	8.15141e-05	0.000154459	0.000126035	7.27666e-05
	H3K27ac	3.72297	0.825791	3.57122	2.70666	1.33142	0.768695		0.0896894	0.0357289	0.0408663	0.0554282	0.0243169	0.0140394
Ura4	No Antibody	0.0351845	0.0434297	0.0819018	0.0535053	0.0203595	0.0117546		0.000847623	0.00187904	0.00093722	0.0012213	0.000466534	0.000269354
	H3K27ac	4.74501	1.14225	3.89451	3.26059	1.53761	0.887738		0.114311	0.0494209	0.0445657	0.0694325	0.0317958	0.0183573
Omh3	No Antibody	9.36018e-05	0.0144604	0.00487194	0.00647532	0.0059738	0.00344898		2.25494e-06	0.000625649	5.57506e-05	0.000227885	0.000282108	0.000162875
	H3K27ac	4.08063	0.997517	3.33779	2.80531	1.31378	0.758514		0.0983056	0.0431589	0.0381951	0.0598865	0.0272419	0.0157281
Mpg1	No Antibody	0.00225769	0.00441721	0.00891737	0.00519742	0.00277421	0.00160169		5.43895e-05	0.000191117	0.000102043	0.00011585	5.66659e-05	3.27161e-05
	H3K27ac	3.89698	0.972713	4.05388	2.97452	1.41694	0.818072		0.0938814	0.0420857	0.0463894	0.0607855	0.0234682	0.0135494
ChrI_LTR	No Antibody	0.00190381	0.00337494	0.00574553	0.00367476	0.00158264	0.000913736		4.58643e-05	0.000146021	6.57473e-05	8.58776e-05	4.32957e-05	2.49968e-05
	H3K27ac	4.34785	0.946723	3.89077	3.06178	1.50717	0.870165		0.104743	0.0409612	0.044523	0.0634092	0.0292638	0.0168955
ChrII_LTR	No Antibody	5.37341e-05	0.00805616	0.00985765	0.00598918	0.00426095	0.00246006		1.2945e-06	0.00034856	0.000112803	0.000154219	0.000144764	8.35794e-05
	H3K27ac	4.00182	0.773026	4.04975	2.94153	1.53349	0.88536		0.096407	0.033446	0.0463421	0.0587317	0.0271557	0.0156784
ChrIII_LTR	No Antibody	0.000109091	0.00297395	0.00350583	0.00219629	0.00149176	0.00086127		2.62808e-06	0.000128672	4.0118e-05	5.71393e-05	5.28461e-05	3.05107e-05
	H3K27ac	4.05234	1.1658	4.48834	3.23549	1.47428	0.851175		0.097624	0.0504398	0.051361	0.066475	0.0220289	0.0127184
NeoS	No Antibody	0.525354	0.00491833	0.00249122	0.177588	0.24591	0.141976		0.0126562	0.000212798	2.85075e-05	0.00429917	0.00590979	0.00341202
	H3K27ac	14.9583	3.46825	18.4895	12.3053	6.41291	3.7025		0.360357	0.150058	0.211579	0.240665	0.0882831	0.0509703
mAct	No Antibody	0.000104433	0.0216183	0.192512	0.0714116	0.0860803	0.0496985		2.51587e-06	0.000935342	0.00220296	0.00104694	0.000901786	0.000520646
	H3K27ac	41.5096	23.1127	87.3881	50.6701	27.028	15.6046		1	1	1	1	0	0
Hoxc8	No Antibody	3.75916e-05	0.000894626	0.00173093	0.000887717	0.00069132	0.000399134		9.05612e-07	3.87072e-05	1.98074e-05	1.98067e-05	1.54324e-05	8.90991e-06
	H3K27ac	8.46565	2.66352	7.19527	6.10815	2.49032	1.43779		0.203944	0.115241	0.082337	0.133841	0.0513585	0.0296519
mSat	No Antibody	0.000913489	0.00114625	0.00233047	0.00146341	0.000620431	0.000358206		2.20067e-05	4.95942e-05	2.66681e-05	3.27563e-05	1.20573e-05	6.96128e-06
	H3K27ac	4.70111	0.804427	4.05948	3.18834	1.70591	0.984907		0.113253	0.0348046	0.0464535	0.0648371	0.0345642	0.0199556
