# Supplementary material for: Large domains of heterochromatin direct the formation of short mitotic chromosome loops
Source: eLife. 2020 Sep 11;9:e57212. doi: 10.7554/eLife.57212 (PMC7515631; doi:10.7554/eLife.57212)
Supplement: Figure 2—source data 2. [file elife-57212-fig2-data2.xlsx]

## Sheet: FISH Binned
		1		2		3		5		7		8		11		12		14		17		18		25		27		29		30
X	X	Y	X	Y	X	Y	X	Y	X	Y	X	Y	X	Y	X	Y	X	Y	X	Y	X	Y	X	Y	X	Y	X	Y	X	Y
0	0	56	0	68	0	104	0	55.2222	0	67	0	16	0	81	0	58.625	0	80	0	79.2222	0	87	0	82.6667	0	61	0	83.2222	0	72
1	1.36986	64.6224	1.23457	64.8568	1.63934	107.153	1.51515	55.5126	1.35135	65.2216	0.78125	17.9902	2.7027	85.0643	1.66667	60.3944	2.12766	85.8124	1.44928	75.5724	1.13636	86.2117	1.40845	75.9542	1.6129	59.1401	1.28205	89.2937	1.69492	65.0493
2	2.73973	71.7043	2.46914	61.0419	3.27869	101.147	3.0303	55.6798	2.7027	59.5756	1.5625	17.4251	5.40541	85.3287	3.33333	63.8889	4.25532	90.2454	2.89855	75.0048	2.27273	71.3906	2.8169	70.1809	3.22581	55.7368	2.5641	96.6989	3.38983	63.0385
3	4.10959	72.4592	3.7037	60.1524	4.91803	89.5271	4.54545	52.697	4.05405	60.7862	2.34375	15.0433	8.10811	87.0468	5	66.575	6.38298	89.5171	4.34783	77.6749	3.40909	59.1005	4.22535	71.2179	4.83871	54.0526	3.84615	100.704	5.08475	60.8078
4	5.47945	65.5281	4.93827	61.127	6.55738	87.1441	6.06061	48.2626	5.40541	58.0586	3.125	14.022	10.8108	89.6297	6.66667	65.8417	8.51064	87.8092	5.7971	82.3361	4.54545	48.3404	5.6338	72.5538	6.45161	53.9768	5.12821	98.1378	6.77966	60.0232
5	6.84932	63.6989	6.17284	64.7036	8.19672	87.7872	7.57576	46.6717	6.75676	55.0439	3.90625	14	13.5135	91.7911	8.33333	64.3472	10.6383	92.2253	7.24638	89.0106	5.68182	49.73	7.04225	70.7747	8.06452	52.9534	6.41026	84.6995	8.47458	60.9707
6	8.21918	63.8598	7.40741	63.6679	9.83607	89.0782	9.09091	46.0643	8.10811	52.328	4.6875	15.2148	16.2162	94.0468	10	65.7	12.766	94.074	8.69565	94.4669	6.81818	47.1523	8.4507	67.9491	9.67742	50.9862	7.69231	74.2847	10.1695	61.7097
7	9.58904	60.9916	8.64198	60.9958	11.4754	88.5846	10.6061	46.2885	9.45946	56.5946	5.46875	15.0179	18.9189	94.8444	11.6667	66.8764	14.8936	106.07	10.1449	97.7774	7.95455	48.3553	9.85915	65.6441	11.2903	47.7742	8.97436	69.1307	11.8644	61.619
8	10.9589	58.9615	9.87654	59.7265	13.1148	87.0304	12.1212	49.1457	10.8108	65.5951	6.25	15	21.6216	90.4134	13.3333	71.5917	17.0213	116.137	11.5942	99.4611	9.09091	49.3922	11.2676	64.4601	12.9032	45.2772	10.2564	66.5187	13.5593	56.3475
9	12.3288	55.2447	11.1111	61.7627	14.7541	91.0612	13.6364	55.0432	12.1622	75.5227	7.03125	16.8461	24.3243	86.7115	15	72.45	19.1489	121.302	13.0435	99.7687	10.2273	55.8348	12.6761	68.2084	14.5161	47.1025	11.5385	65.7518	15.2542	53.2004
10	13.6986	55.1424	12.3457	64.8193	16.3934	105.392	15.1515	60.9103	13.5135	73.8378	7.8125	16.0524	27.027	82.1344	16.6667	74.8889	21.2766	118.661	14.4928	94.57	11.3636	57.1403	14.0845	78.2352	16.129	50.621	12.8205	62.9833	16.9492	49.9742
11	15.0685	53.5507	13.5802	69.0551	18.0328	120.262	16.6667	69.3704	14.8649	68.742	8.59375	16.9396	29.7297	85.1161	18.3333	73.5806	23.4043	107.658	15.942	84.9257	12.5	58.7529	15.493	81.4227	17.7419	51.7742	14.1026	59.0076	18.6441	49.7597
12	16.4384	52.8018	14.8148	70.3754	19.6721	123.281	18.1818	69.3251	16.2162	58.013	9.375	17.9341	32.4324	88.4777	20	66.15	25.5319	95.7824	17.3913	74.9996	13.6364	61.7366	16.9014	77.1838	19.3548	49.0209	15.3846	58.9645	20.339	52.2136
13	17.8082	54.179	16.0494	67.1584	21.3115	119.2	19.697	65.4447	17.5676	49.9642	10.1562	18.3351	35.1351	95.5413	21.6667	57.8264	27.6596	90.1197	18.8406	68.6536	14.7727	66.7387	18.3099	70.6261	20.9677	46.9542	16.6667	58.0926	22.0339	58.6063
14	19.1781	59.0046	17.284	62.309	22.9508	119.097	21.2121	59.5556	18.9189	47.7772	10.9375	18.5291	37.8378	105.322	23.3333	49.0111	29.7872	85.2352	20.2899	67.684	15.9091	85.6992	19.7183	67.3436	22.5806	47.4433	17.9487	57.8547	23.7288	69.2356
15	20.5479	62.9865	18.5185	60.0988	24.5902	123.919	22.7273	53.4472	20.2703	46.7276	11.7188	18.4297	40.5405	118.153	25	43.0625	31.9149	86.3658	21.7391	66.7303	17.0455	108.853	21.1268	67.4104	24.1935	48.5843	19.2308	60.0674	25.4237	78.4831
16	21.9178	63.2911	19.7531	59.8511	26.2295	127.482	24.2424	53	21.6216	45.1673	12.5	19.5336	43.2432	134.977	26.6667	40.3944	34.0426	92.1558	23.1884	66.3092	18.1818	114.193	22.5352	68.1657	25.8065	53.9356	20.5128	64.2043	27.1186	86.0869
17	23.2877	62.9237	20.9877	64.818	27.8689	121.33	25.7576	51.8838	22.973	43.139	13.2812	23.9737	45.9459	153.342	28.3333	39.4944	36.1702	95.5963	24.6377	66.4927	19.3182	104.622	23.9437	69.0614	27.4194	58.4856	21.7949	70.2308	28.8136	80.7676
18	24.6575	58.7896	22.2222	70.6639	29.5082	101.988	27.2727	53.1341	24.3243	42.8466	14.0625	28.3199	48.6486	170.112	30	39.1	38.2979	97	26.087	65.2294	20.4545	85.9566	25.3521	70.6817	29.0323	61.5019	23.0769	73.9928	30.5085	75.7225
19	26.0274	54.3983	23.4568	78.9434	31.1475	82.7532	28.7879	58.1691	25.6757	41.9552	14.8438	31.6451	51.3514	189.047	31.6667	39.5681	40.4255	94.5187	27.5362	64.821	21.5909	78.4524	26.7606	73.7498	30.6452	62.9227	24.359	74.0556	32.2034	68.9644
20	27.3973	56.9548	24.6914	83.2499	32.7869	73.9336	30.303	61.1833	27.027	42.9595	15.625	31.9166	54.0541	206.508	33.3333	41.4444	42.5532	96.9936	28.9855	62.7874	22.7273	75.2225	28.169	75.6469	32.2581	60.2564	25.641	70.1867	33.8983	68.8782
21	28.7671	61.9426	25.9259	81.5626	34.4262	73.0072	31.8182	58.5854	28.3784	43.1153	16.4062	30.0324	56.7568	225.044	35	42	44.6809	94.278	30.4348	62.5268	23.8636	72.5309	29.5775	79.4871	33.871	57.8113	26.9231	67.2791	35.5932	71.3239
22	30.137	66.3854	27.1605	79.4439	36.0656	76.5574	33.3333	54.7407	29.7297	43.7027	17.1875	24.6088	59.4595	239.618	36.6667	40.0444	46.8085	93.6748	31.8841	63.8221	25	73.2559	30.9859	79.1505	35.4839	55.6367	28.2051	63.0874	37.2881	81.3175
23	31.5068	67.722	28.3951	75.7706	37.7049	72.9918	34.8485	52.0678	31.0811	45.9306	17.9688	20.3725	62.1622	251.05	38.3333	38.1972	48.9362	99.3884	33.3333	64.7037	26.1364	73.9882	32.3944	76.5794	37.0968	57.1994	29.4872	64.7942	38.9831	92.1205
24	32.8767	62.5224	29.6296	78.1579	39.3443	73.8146	36.3636	53.0569	32.4324	50.91	18.75	19.1567	64.8649	246.245	40	34.375	51.0638	102.772	34.7826	67.2798	27.2727	70.7602	33.8028	80.0212	38.7097	55.9893	30.7692	64.4707	40.678	91.7679
25	34.2466	64.6967	30.8642	88.6323	40.9836	82.8938	37.8788	54.4394	33.7838	56.8648	19.5312	18.1695	67.5676	222.055	41.6667	32.4097	53.1915	111.879	36.2319	72.7005	28.4091	65.3247	35.2113	82.8904	40.3226	60.1438	32.0513	61.7952	42.3729	91.2239
26	35.6164	69.6737	32.0988	96.1166	42.623	97.23	39.3939	52.697	35.1351	58.5303	20.3125	17.7615	70.2703	198.525	43.3333	31.9556	55.3191	124.174	37.6812	75.7408	29.5455	62.4039	36.6197	86.8241	41.9355	64.7049	33.3333	60.1111	44.0678	87.5185
27	36.9863	70.8219	33.3333	94.358	44.2623	104.815	40.9091	52.792	36.4865	56.4212	21.0938	17.8265	72.973	179.495	45	31.325	57.4468	145.796	39.1304	73.9273	30.6818	62.0689	38.0282	90.5603	43.5484	67.2803	34.6154	60.4359	45.7627	81.2855
28	38.3562	67.5591	34.5679	87.337	45.9016	99.3808	42.4242	54.375	37.8378	56.2703	21.875	17.9894	75.6757	180.169	46.6667	31	59.5745	156.02	40.5797	74.9607	31.8182	58.7457	39.4366	96.1834	45.1613	68.7469	35.8974	60.7057	47.4576	82.2233
29	39.726	63.9839	35.8025	77.5954	47.541	85.47	43.9394	57.6316	39.1892	55.6142	22.6562	17.1838	78.3784	182.99	48.3333	31.3917	61.7021	163.842	42.029	75.9556	32.9545	55.4616	40.8451	104.029	46.7742	70.7798	37.1795	60.1433	49.1525	86.2366
30	41.0959	67.7123	37.037	65.3277	49.1803	75.9129	45.4545	59.1377	40.5405	53.4711	23.4375	17.0232	81.0811	176.284	50	31	63.8298	167.804	43.4783	76.5026	34.0909	54.0973	42.2535	125.406	48.3871	73.105	38.4615	60.0592	50.8475	99.1803
31	42.4658	71.3762	38.2716	60.8828	50.8197	75.4434	46.9697	62.9747	41.8919	58.4689	24.2188	17	83.7838	160.312	51.6667	30.9764	65.9574	177.261	44.9275	76.4825	35.2273	52.6182	43.662	149.701	50	77.6876	39.7436	60.5897	52.5424	101.581
32	43.8356	70.243	39.5062	61.4708	52.459	76.9567	48.4848	73.3557	43.2432	58.4783	25	17.5768	86.4865	134.975	53.3333	32.0639	68.0851	192.955	46.3768	78.7923	36.3636	51.6588	45.0704	178.557	51.6129	86.3509	41.0256	61.192	54.2373	103.743
33	45.2055	70.0383	40.7407	64.1605	54.0984	76.2737	50	81.0556	44.5946	57.7432	25.7812	18.3557	89.1892	114.34	55	32.5	70.2128	207.178	47.8261	81.6169	37.5	52.1536	46.4789	214.006	53.2258	99.3882	42.3077	62.2765	55.9322	107.46
34	46.5753	71.2185	41.9753	64.9835	55.7377	78.8173	51.5152	84.5491	45.9459	61.1709	26.5625	18.9177	91.8919	100.21	56.6667	32.4333	72.3404	218.498	49.2754	84.8192	38.6364	53.5795	47.8873	242.246	54.8387	112.567	43.5897	63.7778	57.6271	111.093
35	47.9452	74.1561	43.2099	66.5169	57.377	82.0656	53.0303	83.4166	47.2973	69.5305	27.3438	19	94.5946	89.7115	58.3333	33.5833	74.4681	221.883	50.7246	90.0057	39.7727	58.2809	49.2958	252.61	56.4516	124.585	44.8718	65.7567	59.322	111.314
36	49.3151	74.8187	44.4444	66.6296	59.0164	87.4133	54.5455	80.9734	48.6486	74.0418	28.125	19	97.2973	83.6019	60	35.65	76.5957	215.519	52.1739	101.719	40.9091	62.8005	50.7042	240.155	58.0645	129.338	46.1538	69.6121	61.0169	105.088
37	50.6849	70.0541	45.679	64.0433	60.6557	88.6596	56.0606	83.8762	50	79.75	28.9062	18.2033	100	81	61.6667	37.0625	78.7234	211.931	53.6232	124.758	42.0455	64.8738	52.1127	209.748	59.6774	133.868	47.4359	76.6092	62.7119	108.217
38	52.0548	66.1125	46.9136	62.0686	62.2951	89.1153	57.5758	87.7677	51.3514	95.2243	29.6875	18.7738			63.3333	40.5278	80.8511	214.959	55.0725	152.763	43.1818	64.3384	53.5211	176.042	61.2903	137.087	48.7179	79.7061	64.4068	124.836
39	53.4247	65.5121	48.1481	61.7622	63.9344	92.4043	59.0909	94.219	52.7027	109.603	30.4688	19.462			65	43.9375	82.9787	217.731	56.5217	173.097	44.3182	63.4103	54.9296	152.432	62.9032	139.495	50	76.8333	66.1017	149.314
40	54.7945	67.5177	49.3827	59.8734	65.5738	97.7151	60.6061	98.4053	54.0541	116.78	31.25	20.0257			66.6667	49.7222	85.1064	214.096	57.971	185.259	45.4545	64.2247	56.338	138.692	64.5161	142.277	51.2821	73.2439	67.7966	176.643
41	56.1644	72.0822	50.6173	63.144	67.2131	106.051	62.1212	103.717	55.4054	117.029	32.0312	19.7894			68.3333	58.1514	87.234	205.647	59.4203	195.578	46.5909	63.7554	57.7465	132.209	66.129	143.545	52.5641	72.4885	69.4915	194.266
42	57.5342	77.1999	51.8519	64.642	68.8525	110.905	63.6364	115.769	56.7568	121.6	32.8125	21.1385			70	66.7	89.3617	195.414	60.8696	200.358	47.7273	62.9912	59.1549	129.458	67.7419	140.64	53.8462	77.0776	71.1864	207.454
43	58.9041	82.8338	53.0864	65.6749	70.4918	123.348	65.1515	134.2	58.1081	137.708	33.5938	26.4364			71.6667	76.9222	91.4894	174.138	62.3188	203.557	48.8636	63.8129	60.5634	127.268	69.3548	136.263	55.1282	83.5575	72.8814	211.499
44	60.274	93.3201	54.321	67.0372	72.1311	143.053	66.6667	151.444	59.4595	151.414	34.375	29.7064			73.3333	88.2194	93.617	144.458	63.7681	213.555	50	63.2582	61.9718	122.489	70.9677	128.442	56.4103	89.3669	74.5763	193.666
45	61.6438	104.611	55.5556	69.5295	73.7705	168.12	68.1818	159.959	60.8108	158.755	35.1562	31.4791			75	98.0625	95.7447	113.437	65.2174	215.175	51.1364	64.7036	63.3803	115.757	72.5806	120.797	57.6923	102.359	76.2712	171.085
46	63.0137	121.061	56.7901	71.9217	75.4098	188.498	69.697	155.5	62.1622	166.086	35.9375	28.2515			76.6667	109.239	97.8723	99.932	66.6667	208.222	52.2727	74.7571	64.7887	111.945	74.1935	118.601	58.9744	117.711	77.9661	147.141
47	64.3836	131.383	58.0247	74.5075	77.0492	201.871	71.2121	143.106	63.5135	176.453	36.7188	23.7927			78.3333	128.881	100	94.2984	68.1159	213.172	53.4091	96.4828	66.1972	97.652	75.8065	118.754	60.2564	136.905	79.661	124.176
48	65.7534	140.949	59.2593	78.5493	78.6885	213.407	72.7273	137.989	64.8649	180.039	37.5	21.8981			80	147.475			69.5652	224.076	54.5455	113.162	67.6056	88.1033	77.4194	121.676	61.5385	152.785	81.3559	108.989
49	67.1233	155.84	60.4938	84.4061	80.3279	213.85	74.2424	147.62	66.2162	166.621	38.2812	22.4898			81.6667	153.832			71.0145	223.01	55.6818	117.095	69.0141	83.7795	79.0323	121.611	62.8205	166.371	83.0508	106.552
50	68.4932	179.731	61.7284	90.8001	81.9672	204.129	75.7576	167.693	67.5676	137.52	39.0625	23.8241			83.3333	141			72.4638	221.367	56.8182	115.752	70.4225	84.8483	80.6452	118.302	64.1026	179.938	84.7458	104.26
51	69.863	197.589	62.963	108.809	83.6066	190.418	77.2727	192.07	68.9189	111.186	39.8438	25.4015			85	116.775			73.913	211.253	57.9545	112.2	71.831	87.8595	82.2581	109.478	65.3846	193.32	86.4407	110.688
52	71.2329	204.904	64.1975	127.069	85.2459	174.559	78.7879	206.707	70.2703	102.42	40.625	24.7787			86.6667	97.9111			75.3623	202.68	59.0909	131.419	73.2394	84.057	83.871	96.3859	66.6667	212.185	88.1356	112.765
53	72.6027	207.993	65.4321	145.973	86.8852	166.803	80.303	205.285	71.6216	99.0076	41.4062	22.1384			88.3333	82.2306			76.8116	184.446	60.2273	137.596	74.6479	78.2418	85.4839	86.393	67.9487	223.264	89.8305	110.012
54	73.9726	206.329	66.6667	157	88.5246	167.315	81.8182	187.165	72.973	91.9679	42.1875	22.4493			90	68.95			78.2609	159.041	61.3636	134.065	76.0563	67.9746	87.0968	78.197	69.2308	221.712	91.5254	103.735
55	75.3425	204.308	67.9012	168.274	90.1639	164.644	83.3333	158.5	74.3243	79.2878	42.9688	22.0793			91.6667	55.9514			79.7101	130.106	62.5	130.797	77.4648	60.4445	88.7097	74.0517	70.5128	237.947	93.2203	101.186
56	76.7123	190.736	69.1358	196.397	91.8033	148.195	84.8485	135.718	75.6757	71.2894	43.75	21.3641			93.3333	47.3333			81.1594	116.278	63.6364	134.582	78.8732	55.4984	90.3226	70.9105	71.7949	235.113	94.9153	99.8248
57	78.0822	171.571	70.3704	230.353	93.4426	134.638	86.3636	119.627	77.027	67.9237	44.5312	21.4968			95	46.575			82.6087	121.088	64.7727	147.548	80.2817	55.312	91.9355	69.4858	73.0769	226.34	96.6102	90.7771
58	79.4521	166.776	71.6049	246.99	95.082	126.297	87.8788	106.081	78.3784	62.9408	45.3125	21.7468			96.6667	42.3			84.058	120.331	65.9091	161.608	81.6901	56.2335	93.5484	65.5693	74.359	221.418	98.3051	93.7677
59	80.8219	164.093	72.8395	245.921	96.7213	125.358	89.3939	96.7374	79.7297	58.177	46.0938	20.3696			98.3333	36.3806			85.5072	109.177	67.0455	167.866	83.0986	56.8605	95.1613	66.7796	75.641	224.753	100	96.4251
60	82.1918	157.703	74.0741	237.557	98.3607	127.77	90.9091	89.5188	81.0811	52.3104	46.875	20.7014			100	33.625			86.9565	87.1248	68.1818	176.022	84.507	54.7817	96.7742	70.3412	76.9231	207.968
61	83.5616	149.509	75.3086	220.052	100	124.75	92.4242	78.1459	82.4324	46.9073	47.6562	20.757							88.4058	68.2901	69.3182	165.257	85.9155	56.2486	98.3871	74.12	78.2051	166.866
62	84.9315	137.773	76.5432	199.612			93.9394	65.8121	83.7838	41.3046	48.4375	20.7931							89.8551	58.5859	70.4545	143.257	87.3239	60.2961	100	74.3875	79.4872	128.01
63	86.3014	123.493	77.7778	159.036			95.4545	59.6786	85.1351	36.9275	49.2188	21.5846							91.3043	53.9462	71.5909	123.428	88.7324	59.0078			80.7692	103.799
64	87.6712	103.701	79.0123	129.833			96.9697	57.333	86.4865	37.5542	50	22.3292							92.7536	50.8576	72.7273	115.103	90.1408	55.0209			82.0513	89.7528
65	89.0411	80.0384	80.2469	113.516			98.4848	56.5173	87.8378	35.4522	50.7812	21.2442							94.2029	46.6951	73.8636	105.186	91.5493	51.9415			83.3333	82.3333
66	90.411	57.4721	81.4815	107.531			100	58.6667	89.1892	33.6581	51.5625	21.2879							95.6522	42.8782	75	95.7292	92.9577	51.0751			84.6154	77.9645
67	91.7808	49.1359	82.716	102.368					90.5405	30.2905	52.3438	22.2516							97.1014	38.7778	76.1364	86.5568	94.3662	54.5872			85.8974	74.9738
68	93.1507	45.0837	83.9506	93.1015					91.8919	31.0111	53.125	23.4512							98.5507	37.0893	77.2727	78.7819	95.7746	59.0145			87.1795	71.7258
69	94.5205	39.8966	85.1852	89.7546					93.2432	28.5846	53.9062	22.6026							100	36.3333	78.4091	72.9408	97.1831	70.2327			88.4615	66.9224
70	95.8904	36.1474	86.4198	94.1707					94.5946	27.1826	54.6875	23.8824									79.5455	68.2459	98.5915	78.9123			89.7436	60.577
71	97.2603	33.1644	87.6543	104.796					95.9459	25.5774	55.4688	27.1653									80.6818	66.9579	100	78.8889			91.0256	58.1792
72	98.6301	30.4795	88.8889	110.626					97.2973	25.7	56.25	29.6254									81.8182	63.0949					92.3077	57.025
73	100	28.6667	90.1235	106.868					98.6486	24.9658	57.0312	31.4184									82.9545	59.3006					93.5897	54.9576
74			91.358	92.0105					100	25	57.8125	29.4953									84.0909	57.3477					94.8718	53.6029
75			92.5926	77.6722							58.5938	29.0826									85.2273	58.9953					96.1538	52.7446
76			93.8272	75.7696							59.375	29.9534									86.3636	55.4088					97.4359	51.3101
77			95.0617	83.2081							60.1562	31.682									87.5	54.152					98.7179	49.0345
78			96.2963	89.4896							60.9375	32.7182									88.6364	52.201					100	55.2222
79			97.5309	89.672							61.7188	35.0341									89.7727	51.6837
80			98.7654	77.9036							62.5	38.1988									90.9091	62.1534
81			100	65							63.2812	48.2799									92.0455	77.8696
82											64.0625	62.878									93.1818	87.9314
83											64.8438	76.6367									94.3182	93.2692
84											65.625	84.343									95.4545	94.4389
85											66.4062	88.6458									96.5909	87.19
86											67.1875	93.8891									97.7273	74.412
87											67.9688	92.4958									98.8636	64.3346
88											68.75	88.8679									100	55.3186
89											69.5312	87.0654
90											70.3125	90.212
91											71.0938	92.7255
92											71.875	94.0318
93											72.6562	93.7638
94											73.4375	96.1271
95											74.2188	104.404
96											75	114.554
97											75.7812	128.315
98											76.5625	128.775
99											77.3438	120.855
100											78.125	105.93
101											78.9062	92.0603
102											79.6875	78.6545
103											80.4688	64.4226
104											81.25	52.7555
105											82.0312	45.1522
106											82.8125	41.2491
107											83.5938	37.2139
108											84.375	34.8822
109											85.1562	33.0956
110											85.9375	31.4316
111											86.7188	30.9932
112											87.5	29.5128
113											88.2812	28.6713
114											89.0625	27.2872
115											89.8438	28.4192
116											90.625	29.8841
117											91.4062	30.6091
118											92.1875	29.033
119											92.9688	26.7767
120											93.75	27.2168
121											94.5312	26.0676
122											95.3125	24.5039
123											96.0938	24.4366
124											96.875	25.5408
125											97.6562	27.5603
126											98.4375	27.9872
127											99.2188	28.678
128											100	27.3186
	0		0		0		0		0		0		0		0		0		0		0		0		0		0		0				Mean	STDDEV	SEM
	5	66.1965	5	63.0356	5	100.457	5	54.7779	5	63.1459	5	15.6708	5	83.0322	5	62.3708	5	85.3526	5	76.8686	5	70.4086	5	75.0049	5	57.4824	5	92.4797	5	66.6959		FISH	68.8653	18.9925	4.90384
	10	63.5196	10	62.2734	10	88.0032	10	46.9995	10	55.5063	10	16.2983	10	86.1877	10	65.616	10	88.6632	10	88.6045	10	48.6574	10	69.2304	10	52.6388	10	81.5632	10	60.6006			64.9575	19.3608	4.99895
	15	56.4495	15	66.5031	15	88.8921	15	50.1591	15	70.9244	15	22.6809	15	90.7104	15	69.1545	15	97.4563	15	97.8943	15	60.0407	15	70.3012	15	46.718	15	63.5654	15	59.8921			67.4228	19.7201	5.0917
	20	54.884	20	62.3543	20	116.312	20	66.2626	20	51.9181	20	24.0428	20	94.4456	20	71.7674	20	118.719	20	76.193	20	103.342	20	74.144	20	50.472	20	58.7448	20	50.9781			71.6387	25.6331	6.61843
	25	61.9977	25	74.4188	25	120.738	25	55.3343	25	44.4701	25	17.4802	25	88.5624	25	54.0125	25	113.16	25	66.8041	25	77.0837	25	68.2125	25	47.6606	25	70.6209	25	60.0185			68.0383	24.968	6.4467
	30	57.7652	30	78.7338	30	116.933	30	54.3957	30	42.9332	30	18.5468	30	83.6252	30	40.5128	30	90.3791	30	64.2793	30	69.1466	30	74.8914	30	57.9744	30	66.3368	30	81.7792			66.5489	22.6542	5.8493
	35	65.3316	35	91.611	35	76.5647	35	56.6443	35	51.2351	35	22.7597	35	88.4777	35	40.5281	35	89.2608	35	64.5831	35	57.5934	35	78.5837	35	60.3301	35	61.7032	35	71.1884			65.093	18.1376	4.6831
	40	68.0096	40	66.3192	40	74.4546	40	53.3978	40	56.709	40	25.3053	40	100.432	40	38.6542	40	96.2981	40	74.1229	40	53.6582	40	89.1145	40	56.2751	40	60.3745	40	81.5873			66.3141	19.9139	5.14174
	45	69.7772	45	65.5726	45	94.9795	45	54.9329	45	57.0404	45	22.3844	45	126.565	45	32.5163	45	95.2634	45	75.9754	45	63.8558	45	126.379	45	64.043	45	63.2508	45	90.1701			73.5137	28.4059	7.33437
	50	72.5579	50	61.9369	50	86.9212	50	69.1309	50	71.1233	50	21.1831	50	161.727	50	31.1792	50	96.5316	50	81.7428	50	63.6085	50	221.855	50	72.5798	50	75.6902	50	83.2485			84.7344	47.3036	12.2137
	55	67.2991	55	65.1245	55	76.2246	55	82.4987	55	100.339	55	22.4356	55	197.777	55	31.6351	55	107.326	55	105.494	55	82.4727	55	194.594	55	93.9984	55	74.9108	55	101.502			93.5754	46.7585	12.073
	60	77.372	60	73.627	60	82.7654	60	88.621	60	131.938	60	29.4567	60	232.331	60	33.5417	60	141.996	60	176.674	60	119.117	60	133.453	60	129.263	60	98.2485	60	109.956			110.557	50.314	12.991
	65	112.594	65	102.771	65	90.0597	65	105.964	65	170.333	65	46.4897	65	248.647	65	39.2944	65	165.823	65	205.823	65	136.918	65	119.365	65	139.62	65	159	65	112.714			130.361	53.2582	13.7512
	70	168.527	70	166.911	70	104.89	70	150.276	70	138.443	70	89.2178	70	222.055	70	54.6278	70	185.108	70	215.161	70	167.688	70	89.8449	70	140.149	70	212.62	70	173.407			151.928	48.0975	12.4187
	75	206.409	75	240.205	75	144.84	75	142.905	75	93.1709	75	97.9741	75	189.01	75	82.476	75	215.853	75	218.543	75	116.54	75	83.7516	75	122.613	75	230.205	75	204.206			159.247	55.8541	14.4215
	80	183.348	80	177.133	80	201.259	80	188.823	80	65.0827	80	109.878	80	181.579	80	120.914	80	213.725	80	169.068	80	80.4509	80	61.3058	80	120.68	80	181.899	80	147.467			146.841	48.6546	12.5626
	85	152.27	85	104.129	85	202.799	85	171.667	85	46.8408	85	45.9459	85	168.298	85	139.77	85	216.345	85	119.232	85	61.6753	85	55.7969	85	108.056	85	88.4625	85	106.6			119.193	53.2241	13.7424
	90	102.411	90	99.8368	90	169.559	90	107.482	90	35.898	90	29.9158	90	124.657	90	91.4667	90	205.053	90	80.7944	90	54.4882	90	58.5175	90	79.5472	90	68.5498	90	111.155			94.6221	45.385	11.7184
	95	47.8971	95	88.0801	95	149.159	95	77.8256	95	29.2672	95	28.2645	95	94.9605	95	54.7024	95	159.298	95	50.4996	95	80.3059	95	53.1562	95	68.6552	95	55.9412	95	101.582			75.973	37.2442	9.61641
	100	32.1145	100	81.0547	100	126.044	100	58.0489	100	25.3108	100	26.5751	100	82.301	100	39.7202	100	102.556	100	38.7697	100	75.1388	100	71.7621	100	71.4071	100	52.0778	100	93.6566			65.1024	28.7287	7.41771

## Sheet: IF Binned
		1		2		3		5		7		8		11		12		14		17		18		25		27		29		30
X	X	Y	X	Y	X	Y	X	Y	X	Y	X	Y	X	Y	X	Y	X	Y	X	Y	X	Y	X	Y	X	Y	X	Y	X	Y
0	0	138	0	152	0	85	0	114.889	0	103.5	0	61	0	68	0	57.125	0	85	0	104.444	0	77	0	64.6667	0	117	0	137	0	125
1	1.36986	147.288	1.23457	142.092	1.63934	87.0492	1.51515	118.462	1.35135	117.5	0.78125	73.1423	2.7027	70.1841	1.66667	76.6764	2.12766	97.4146	1.44928	113.628	1.13636	91.6859	1.40845	77.6652	1.6129	115.853	1.28205	135.315	1.69492	137.897
2	2.73973	152.93	2.46914	135.753	3.27869	96.3015	3.0303	118.514	2.7027	135.211	1.5625	85.9081	5.40541	73.534	3.33333	94.4556	4.25532	105.778	2.89855	128.662	2.27273	104.043	2.8169	90.7827	3.22581	111.99	2.5641	134.629	3.38983	151.043
3	4.10959	150.693	3.7037	137.535	4.91803	103.23	4.54545	115.952	4.05405	138.8	2.34375	97.6409	8.10811	73.9883	5	111.8	6.38298	112.791	4.34783	145.435	3.40909	111.722	4.22535	99.1322	4.83871	103.914	3.84615	132.05	5.08475	159.05
4	5.47945	148.033	4.93827	146.702	6.55738	104.782	6.06061	106.692	5.40541	141.73	3.125	108.39	10.8108	73.3426	6.66667	120.439	8.51064	118.153	5.7971	157.501	4.54545	118.909	5.6338	109.144	6.45161	93.1625	5.12821	131.71	6.77966	165.318
5	6.84932	149.215	6.17284	154.268	8.19672	98.499	7.57576	94.9313	6.75676	140.412	3.90625	116.938	13.5135	72.9584	8.33333	120.66	10.6383	118.4	7.24638	163.214	5.68182	126.369	7.04225	117.029	8.06452	77.9192	6.41026	128.772	8.47458	158.498
6	8.21918	155.425	7.40741	155.317	9.83607	85.8057	9.09091	80.4013	8.10811	139.788	4.6875	121.413	16.2162	72.1154	10	122.6	12.766	114.508	8.69565	160.927	6.81818	128.434	8.4507	123.009	9.67742	66.9604	7.69231	122.039	10.1695	146.601
7	9.58904	158.643	8.64198	148.85	11.4754	73.3748	10.6061	66.4047	9.45946	134.642	5.46875	127.153	18.9189	78.3448	11.6667	123.115	14.8936	105.006	10.1449	151.696	7.95455	123.495	9.85915	131.642	11.2903	61.8542	8.97436	108.104	11.8644	128.126
8	10.9589	164.288	9.87654	135.549	13.1148	63.2362	12.1212	56.3104	10.8108	125.376	6.25	129.665	21.6216	78.7648	13.3333	120.903	17.0213	93.1104	11.5942	139.162	9.09091	116.395	11.2676	132.885	12.9032	59.1715	10.2564	89.2643	13.5593	110.127
9	12.3288	158.093	11.1111	113.722	14.7541	55.9601	13.6364	48.3636	12.1622	113.374	7.03125	124.591	24.3243	81.1826	15	112.938	19.1489	81.5444	13.0435	125.522	10.2273	104.028	12.6761	129.11	14.5161	55.5889	11.5385	74.9872	15.2542	81.5534
10	13.6986	140.712	12.3457	90.8848	16.3934	52.5765	15.1515	47.2238	13.5135	92.2243	7.8125	110.965	27.027	80.8919	16.6667	96.6111	21.2766	71.1213	14.4928	110.885	11.3636	81.7459	14.0845	123.572	16.129	54.2279	12.8205	61.947	16.9492	64.2927
11	15.0685	117.241	13.5802	77.32	18.0328	48.9607	16.6667	49.1852	14.8649	73.5724	8.59375	98.5251	29.7297	78.0811	18.3333	79.1014	23.4043	63.9972	15.942	100.775	12.5	66.7541	15.493	113.707	17.7419	53.1721	14.1026	53.1091	18.6441	55.222
12	16.4384	98.9809	14.8148	71.1235	19.6721	40.4878	18.1818	55.6639	16.2162	58.0778	9.375	84.9416	32.4324	75.8897	20	63.2	25.5319	61.9985	17.3913	92.5362	13.6364	54.9851	16.9014	98.19	19.3548	52.4103	15.3846	47.4004	20.339	49.0034
13	17.8082	85.0649	16.0494	69.0254	21.3115	35.7039	19.697	60.9953	17.5676	50.5096	10.1562	67.0274	35.1351	76.1724	21.6667	52.1486	27.6596	57.5488	18.8406	82.8234	14.7727	46.3804	18.3099	83.6244	20.9677	51.3608	16.6667	43.3519	22.0339	45.9136
14	19.1781	73.561	17.284	66.7844	22.9508	32.6348	21.2121	66.1916	18.9189	44.3981	10.9375	53.0716	37.8378	85.2126	23.3333	47.6611	29.7872	56.7405	20.2899	75.8462	15.9091	44.19	19.7183	68.0648	22.5806	50.5258	17.9487	41.954	23.7288	41.277
15	20.5479	66.3288	18.5185	63.7104	24.5902	32.7541	22.7273	61.0588	20.2703	40.9759	11.7188	42.4299	40.5405	94.3696	25	46.25	31.9149	59.8415	21.7391	69.104	17.0455	38.4712	21.1268	57.2878	24.1935	48.6175	19.2308	39.6894	25.4237	38.9689
16	21.9178	62.484	19.7531	59.1442	26.2295	31.3346	24.2424	60.4347	21.6216	35.7201	12.5	34.6747	43.2432	107.793	26.6667	42.9806	34.0426	60.5838	23.1884	62.8358	18.1818	34.1128	22.5352	52.9826	25.8065	48.792	20.5128	39.9064	27.1186	38.0656
17	23.2877	58.5064	20.9877	55.5	27.8689	30.524	25.7576	55.7758	22.973	31.9266	13.2812	30.3736	45.9459	126.291	28.3333	39.2514	36.1702	63.0325	24.6377	59.6937	19.3182	31.3231	23.9437	50.5315	27.4194	46.8099	21.7949	39.7041	28.8136	35.7997
18	24.6575	54.0561	22.2222	53.1248	29.5082	30.9815	27.2727	52.0174	24.3243	29.4266	14.0625	26.4998	48.6486	137.309	30	34.1	38.2979	62.1727	26.087	59.5917	20.4545	28.1059	25.3521	48.1925	29.0323	47.7419	23.0769	39.0329	30.5085	37.6525
19	26.0274	47.6164	23.4568	54.358	31.1475	30.1477	28.7879	50.0002	25.6757	28.0608	14.8438	25.0957	51.3514	146.026	31.6667	29.9542	40.4255	61.2087	27.5362	61.9998	21.5909	25.7863	26.7606	46.5768	30.6452	50.9723	24.359	40.1659	32.2034	40.0735
20	27.3973	41.4931	24.6914	57.4993	32.7869	29.0986	30.303	47.4904	27.027	26.2177	15.625	24.0265	54.0541	157.255	33.3333	27.5139	42.5532	60.7756	28.9855	62.8133	22.7273	23.9178	28.169	44.6854	32.2581	53.1452	25.641	40.8166	33.8983	41.7327
21	28.7671	39.7795	25.9259	60.7878	34.4262	27.2571	31.8182	49.3196	28.3784	25.6968	16.4062	22.2079	56.7568	149.696	35	27.0625	44.6809	57.6847	30.4348	64.3718	23.8636	23.1491	29.5775	40.7214	33.871	55.8661	26.9231	39.6282	35.5932	41.3716
22	30.137	40.4095	27.1605	60.3269	36.0656	25.5902	33.3333	50.3704	29.7297	25	17.1875	22.6127	59.4595	147.541	36.6667	28.4278	46.8085	54.5075	31.8841	65.5262	25	22.0241	30.9859	38.1119	35.4839	57.9487	28.2051	40.5759	37.2881	40.4728
23	31.5068	42.2668	28.3951	54.1693	37.7049	23.8443	34.8485	49.9697	31.0811	24.4017	17.9688	23.4659	62.1622	144.756	38.3333	30.9972	48.9362	52.3459	33.3333	67.1852	26.1364	22.8359	32.3944	40.2993	37.0968	57.4855	29.4872	42.0371	38.9831	40.1472
24	32.8767	43.7926	29.6296	51.9239	39.3443	23.0822	36.3636	50.3939	32.4324	23.0362	18.75	24.8006	64.8649	135.64	40	31.7	51.0638	50.3372	34.7826	66.6087	27.2727	24.305	33.8028	43.4717	38.7097	58.7647	30.7692	43.9389	40.678	41.6336
25	34.2466	45.8098	30.8642	49.3349	40.9836	26.7369	37.8788	48.7701	33.7838	23.3221	19.5312	24.7979	67.5676	129.306	41.6667	30.2708	53.1915	53.3893	36.2319	64.8568	28.4091	24.2179	35.2113	49.9342	40.3226	61.2025	32.0513	41.2607	42.3729	40.6981
26	35.6164	45.4483	32.0988	50.7751	42.623	26.2174	39.3939	49.1252	35.1351	23.9094	20.3125	24.3179	70.2703	118.763	43.3333	29.6222	55.3191	58.7661	37.6812	60.7826	29.5455	23.05	36.6197	61.4385	41.9355	63.0164	33.3333	39.5556	44.0678	41.9985
27	36.9863	46.0465	33.3333	55.3827	44.2623	26.1623	40.9091	50.9086	36.4865	22.2432	21.0938	23.4696	72.973	109.248	45	27.65	57.4468	64.992	39.1304	59.5969	30.6818	22.4698	38.0282	61.7418	43.5484	59.9343	34.6154	38.2025	45.7627	39.8878
28	38.3562	46.7763	34.5679	55.7627	45.9016	27.6012	42.4242	53.6985	37.8378	24.0992	21.875	22.2333	75.6757	97.0752	46.6667	25.2528	59.5745	71.6086	40.5797	57.6482	31.8182	22.2496	39.4366	59.3897	45.1613	54.4268	35.8974	38.5067	47.4576	40.3604
29	39.726	47.5724	35.8025	53.5634	47.541	28.4772	43.9394	51.184	39.1892	25.8253	22.6562	21.934	78.3784	90.057	48.3333	25.0431	61.7021	79.8975	42.029	56.5585	32.9545	22.8116	40.8451	54.8675	46.7742	47.7708	37.1795	38.4753	49.1525	45.8799
30	41.0959	46.0597	37.037	51.7671	49.1803	28.9914	45.4545	48.7603	40.5405	27.7297	23.4375	21.7189	81.0811	85.0131	50	27.5	63.8298	86.0863	43.4783	58.482	34.0909	23.3982	42.2535	52.6843	48.3871	43.8336	38.4615	40.3452	50.8475	51.2413
31	42.4658	47.3351	38.2716	51.6083	50.8197	30.8355	46.9697	50.3898	41.8919	29.3954	24.2188	20.8833	83.7838	86.2286	51.6667	29.5111	65.9574	93.5315	44.9275	60.2516	35.2273	22.7133	43.662	50.8873	50	41.0934	39.7436	40.1155	52.5424	57.0249
32	43.8356	49.4913	39.5062	52.4416	52.459	33.6512	48.4848	53.547	43.2432	28.0184	25	22.5868	86.4865	85.7641	53.3333	31.4472	68.0851	100.397	46.3768	61.8953	36.3636	23.0998	45.0704	51.4684	51.6129	39.3727	41.0256	41.2308	54.2373	62.5799
33	45.2055	51.3425	40.7407	51.2404	54.0984	32.5851	50	52.2222	44.5946	24.9797	25.7812	25.0095	89.1892	85.3148	55	33.15	70.2128	103.687	47.8261	65.54	37.5	24.1695	46.4789	56.2682	53.2258	37.6576	42.3077	44.3892	55.9322	65.4825
34	46.5753	54.6021	41.9753	47.1011	55.7377	31.0656	51.5152	49.4279	45.9459	24.3543	26.5625	26.8273	91.8919	84.0234	56.6667	33.3222	72.3404	108.032	49.2754	63.0536	38.6364	24.7808	47.8873	63.0685	54.8387	38.9329	43.5897	46.4916	57.6271	68.7313
35	47.9452	57.6946	43.2099	45.7951	57.377	28.8686	53.0303	45.7091	47.2973	25.4234	27.3438	27.8642	94.5946	82.2162	58.3333	30.9583	74.4681	110.203	50.7246	67.9212	39.7727	26.2378	49.2958	71.5494	56.4516	41.0418	44.8718	46.8679	59.322	72.4009
36	49.3151	58.9805	44.4444	42.749	59.0164	28.459	54.5455	44.1791	48.6486	26.441	28.125	27.2583	97.2973	80.767	60	29.75	76.5957	106.646	52.1739	69.1149	40.9091	29	50.7042	77.8184	58.0645	46.8278	46.1538	46.3688	61.0169	79.8061
37	50.6849	56.8591	45.679	40.8971	60.6557	28.1791	56.0606	46.8952	50	26.25	28.9062	26.2033	100	76	61.6667	24.8611	78.7234	101.884	53.6232	70.912	42.0455	28.9349	52.1127	85.9953	59.6774	57.113	47.4359	43.2748	62.7119	94.5374
38	52.0548	57.9605	46.9136	39.8491	62.2951	29.6555	57.5758	46.4212	51.3514	28.2235	29.6875	25.9652			63.3333	22.1389	80.8511	98.7383	55.0725	71.362	43.1818	29.6442	53.5211	93.814	61.2903	70.5204	48.7179	41.8902	64.4068	103.108
39	53.4247	57.6217	48.1481	40.8817	63.9344	30.1932	59.0909	48.438	52.7027	29.1543	30.4688	23.9388			65	22.0125	82.9787	95.9745	56.5217	74.3235	44.3182	30.8191	54.9296	98.084	62.9032	84.4884	50	39.8333	66.1017	113.564
40	54.7945	56.1983	49.3827	44.5522	65.5738	30.7665	60.6061	51.4962	54.0541	29.5387	31.25	22.5593			66.6667	24.5	85.1064	92.798	57.971	76.4203	45.4545	30.9321	56.338	98.6729	64.5161	99.5211	51.2821	40.2167	67.7966	122.975
41	56.1644	57.8685	50.6173	48.2115	67.2131	31.4621	62.1212	54.6192	55.4054	32.6101	32.0312	22.908			68.3333	31.3417	87.234	89.7992	59.4203	84.2937	46.5909	30.3993	57.7465	93.3318	66.129	103.538	52.5641	42.2673	69.4915	132.745
42	57.5342	62.8626	51.8519	46.2736	68.8525	34.3894	63.6364	59.2746	56.7568	36.9883	32.8125	22.7852			70	39	89.3617	83.6927	60.8696	96.4178	47.7273	31.7194	59.1549	87.9556	67.7419	105.269	53.8462	45.7133	71.1864	139.854
43	58.9041	72.3557	53.0864	42.8278	70.4918	37.538	65.1515	65.0695	58.1081	47.3111	33.5938	23.6788			71.6667	47.9764	91.4894	75.8593	62.3188	113.15	48.8636	31.2276	60.5634	83.0393	69.3548	103.366	55.1282	52.0608	72.8814	140.507
44	60.274	88.7244	54.321	42.0923	72.1311	40.7834	66.6667	71.2222	59.4595	55.5524	34.375	25.9724			73.3333	57.9917	93.617	69.9077	63.7681	131.169	50	30.9671	61.9718	74.0992	70.9677	98.2074	56.4103	60.286	74.5763	132.793
45	61.6438	107.194	55.5556	40.4705	73.7705	45.6666	68.1818	81.3802	60.8108	61.4723	35.1562	29.3567			75	69.25	95.7447	66.6713	65.2174	143.117	51.1364	29.8366	63.3803	70.0485	72.5806	95.0459	57.6923	69.2433	76.2712	121.617
46	63.0137	115.482	56.7901	43.2634	75.4098	52.2327	69.697	95.5354	62.1622	62.9474	35.9375	30.8553			76.6667	79.3333	97.8723	67.602	66.6667	146	52.2727	32.045	64.7887	67.9735	74.1935	90.7756	58.9744	78.9849	77.9661	111.209
47	64.3836	116.591	58.0247	44.6283	77.0492	61.0737	71.2121	112.584	63.5135	62.5518	36.7188	29.8531			78.3333	89.9194	100	69.6208	68.1159	142.222	53.4091	32.7397	66.1972	60.4273	75.8065	83.0807	60.2564	84.7804	79.661	103.746
48	65.7534	115.365	59.2593	48.0677	78.6885	69.9468	72.7273	126.496	64.8649	59.6622	37.5	28.077			80	94.325			69.5652	127.911	54.5455	34.1611	67.6056	58.6761	77.4194	73.927	61.5385	93.1716	81.3559	99.6294
49	67.1233	116.892	60.4938	54.5391	80.3279	76.3934	74.2424	137.05	66.2162	57.2905	38.2812	26.7312			81.6667	91.0778			71.0145	121.586	55.6818	33.9409	69.0141	54.3717	79.0323	62.5635	62.8205	101.81	83.0508	93.306
50	68.4932	122.401	61.7284	59.8925	81.9672	77.0615	75.7576	145.158	67.5676	55.9007	39.0625	27.5378			83.3333	84.3333			72.4638	116.457	56.8182	32.4239	70.4225	52.1191	80.6452	56.9197	64.1026	112.696	84.7458	84.0179
51	69.863	128.491	62.963	67.8869	83.6066	74.6204	77.2727	144.228	68.9189	53.1648	39.8438	29.0069			85	73.1125			73.913	105.094	57.9545	33.9961	71.831	49.0326	82.2581	51.8138	65.3846	122.7	86.4407	71.3714
52	71.2329	128.964	64.1975	74.5272	85.2459	70.2623	78.7879	129.921	70.2703	48.4459	40.625	33.5315			86.6667	64.0806			75.3623	100.413	59.0909	33.2117	73.2394	46.5339	83.871	48.1781	66.6667	128.185	88.1356	60.5363
53	72.6027	126.191	65.4321	85.4861	86.8852	65.4571	80.303	117.266	71.6216	43.4257	41.4062	39.6948			88.3333	55.2153			76.8116	93.7989	60.2273	34.7476	74.6479	43.5032	85.4839	44.2843	67.9487	129.023	89.8305	55.8042
54	73.9726	119.066	66.6667	94.0123	88.5246	60.8285	81.8182	97.7254	72.973	39.3251	42.1875	45.9084			90	47.8			78.2609	83.1441	61.3636	42.4479	76.0563	41.3047	87.0968	43.7177	69.2308	128.441	91.5254	54.7695
55	75.3425	107.829	67.9012	112.15	90.1639	53.04	83.3333	83.1111	74.3243	36.3965	42.9688	47.1468			91.6667	42.375			79.7101	72.502	62.5	48.7517	77.4648	40.1816	88.7097	44.1459	70.5128	123.077	93.2203	54.0411
56	76.7123	98.4188	69.1358	136.933	91.8033	50.1513	84.8485	74.7964	75.6757	32.8881	43.75	45.9411			93.3333	40.2167			81.1594	64.5169	63.6364	60.0795	78.8732	39.5587	90.3226	46.1171	71.7949	119.371	94.9153	54.7396
57	78.0822	89.2719	70.3704	149.069	93.4426	46.048	86.3636	69.4022	77.027	29.473	44.5312	43.3186			95	38.1875			82.6087	59.4348	64.7727	65.051	80.2817	40.9593	91.9355	47.5803	73.0769	112.635	96.6102	53.8228
58	79.4521	80.2922	71.6049	150.393	95.082	43.3461	87.8788	62.3734	78.3784	28.3272	45.3125	40.5679			96.6667	38.6667			84.058	55.3022	65.9091	66.9979	81.6901	42.1976	93.5484	44.6073	74.359	99.8597	98.3051	53.2917
59	80.8219	71.0627	72.8395	141.746	96.7213	42.5483	89.3939	57.1876	79.7297	26.2432	46.0938	36.0751			98.3333	38.3583			85.5072	54.2363	67.0455	73.6924	83.0986	42.4286	95.1613	41.653	75.641	87.8895	100	51.0823
60	82.1918	59.4834	74.0741	126.112	98.3607	43.8565	90.9091	49.9174	81.0811	24.094	46.875	33.9661			100	37.375			86.9565	55.8645	68.1818	80.4233	84.507	47.2464	96.7742	38.8483	76.9231	75.6693
61	83.5616	52.6128	75.3086	104.314	100	45.5	92.4242	46.3134	82.4324	23.1187	47.6562	32.0517							88.4058	54.2899	69.3182	90.6317	85.9155	52.3758	98.3871	37.5164	78.2051	65.3964
62	84.9315	51.3309	76.5432	79.5617			93.9394	40.6302	83.7838	20.8649	48.4375	32.8384							89.8551	53.9451	70.4545	89.9695	87.3239	55.5225	100	33.1463	79.4872	56.7508
63	86.3014	52.7906	77.7778	59.4787			95.4545	36.6878	85.1351	20.4459	49.2188	33.7353							91.3043	50.1949	71.5909	91.4357	88.7324	57.7449			80.7692	51.1177
64	87.6712	55.5952	79.0123	52.4022			96.9697	35.2675	86.4865	20.1894	50	33.3507							92.7536	49.0781	72.7273	91.0093	90.1408	59.9701			82.0513	48.8966
65	89.0411	60.2211	80.2469	52.4988			98.4848	32.8838	87.8378	19.5767	50.7812	30.2513							94.2029	47.1446	73.8636	82.9853	91.5493	58.3679			83.3333	52.8333
66	90.411	63.8767	81.4815	52.9364			100	31.3333	89.1892	19.523	51.5625	29.7264							95.6522	47.5883	75	73.5431	92.9577	58.4918			84.6154	54.4418
67	91.7808	67.1279	82.716	57.0811					90.5405	19.0337	52.3438	26.6227							97.1014	49.6131	76.1364	65.0167	94.3662	56.5059			85.8974	54.6979
68	93.1507	67.9954	83.9506	61.536					91.8919	19.6622	53.125	25.0195							98.5507	48.517	77.2727	54.4831	95.7746	57.4502			87.1795	54.9172
69	94.5205	66.0199	85.1852	63.8677					93.2432	20.9493	53.9062	25.0064							100	47.6667	78.4091	47.842	97.1831	58.5178			88.4615	52.0904
70	95.8904	58.803	86.4198	57.9195					94.5946	21.4032	54.6875	23.973									79.5455	42.0752	98.5915	55.9129			89.7436	50.7094
71	97.2603	52.4346	87.6543	50.8268					95.9459	21.2826	55.4688	24.8431									80.6818	38.0803	100	51.4444			91.0256	48.548
72	98.6301	43.8169	88.8889	44.096					97.2973	19.6897	56.25	25.9533									81.8182	33.9708					92.3077	47.0664
73	100	39	90.1235	39.7882					98.6486	18.358	57.0312	26.2789									82.9545	31.4072					93.5897	43.9568
74			91.358	42.7725					100	16	57.8125	26.154									84.0909	29.0236					94.8718	41.0756
75			92.5926	45.4926							58.5938	27.0974									85.2273	27.631					96.1538	38.499
76			93.8272	47.1482							59.375	27.0524									86.3636	25.9682					97.4359	38.547
77			95.0617	46.348							60.1562	27.8769									87.5	25.4895					98.7179	39.3064
78			96.2963	45.3827							60.9375	28.8993									88.6364	25.0795					100	41.6667
79			97.5309	44.3951							61.7188	31.6178									89.7727	24.2066
80			98.7654	41.3366							62.5	34.8589									90.9091	25.3376
81			100	40.3333							63.2812	41.6868									92.0455	25.6912
82											64.0625	50.2482									93.1818	24.6798
83											64.8438	60.6257									94.3182	23.4101
84											65.625	65.5787									95.4545	22.1004
85											66.4062	71.3251									96.5909	21.8788
86											67.1875	73.8603									97.7273	23.3648
87											67.9688	75.8523									98.8636	23.2389
88											68.75	80.5746									100	23.8539
89											69.5312	86.4923
90											70.3125	94.9641
91											71.0938	96.5676
92											71.875	90.4293
93											72.6562	83.819
94											73.4375	77.5211
95											74.2188	73.7315
96											75	71.857
97											75.7812	70.1076
98											76.5625	69.2927
99											77.3438	66.7074
100											78.125	62.2622
101											78.9062	57.8198
102											79.6875	49.9874
103											80.4688	45.2287
104											81.25	41.8672
105											82.0312	40.9889
106											82.8125	40.5972
107											83.5938	40.3433
108											84.375	38.9155
109											85.1562	37.4256
110											85.9375	35.9681
111											86.7188	36.542
112											87.5	37.0181
113											88.2812	39.1643
114											89.0625	40.6222
115											89.8438	42.7359
116											90.625	43.9455
117											91.4062	46.7117
118											92.1875	48.2201
119											92.9688	47.5868
120											93.75	48.9633
121											94.5312	47.1934
122											95.3125	45.6621
123											96.0938	44.5563
124											96.875	43.4637
125											97.6562	42.0317
126											98.4375	40.7609
127											99.2188	39.6624
128											100	39.0092
	0		0		0		0		0		0		0		0		0		0		0		0		0		0		0				Mean	STDDEV	SEM
	5	147.228	5	142.816	5	92.895	5	116.954	5	123.753	5	94.9189	5	69.0921	5	85.0143	5	96.0641	5	123.042	5	100.672	5	83.0617	5	112.189	5	134.749	5	137.98		IF	110.695	23.2207	5.99555
	10	152.829	10	148.496	10	96.3623	10	94.0082	10	139.143	10	112.64	10	73.7612	10	118.875	10	115.472	10	160.547	10	123.673	10	120.206	10	79.3474	10	122.656	10	160.955			121.265	26.6773	6.88804
	15	154.364	15	88.2625	15	64.1904	15	57.0262	15	101.137	15	39.8818	15	73.1505	15	119.889	15	112.638	15	131.816	15	70.7788	15	128.522	15	58.8715	15	69.8269	15	128.285			93.2427	33.1771	8.56628
	20	93.7119	20	64.6661	20	47.3417	20	53.267	20	50.9952	20	23.6519	20	75.2301	20	87.9625	20	87.3274	20	92.0449	20	37.0243	20	90.8965	20	53.2701	20	43.0989	20	67.0227			64.5007	21.7754	5.62238
	25	60.3438	25	55.1205	25	33.6976	25	62.5617	25	34.5123	25	22.4491	25	79.9737	25	52.3149	25	67.5593	25	66.8699	25	24.5966	25	53.6006	25	50.168	25	39.7023	25	45.398			49.9246	15.9955	4.13003
	30	42.963	30	56.802	30	30.9467	30	52.5978	30	26.2438	30	25.9592	30	79.4865	30	40.6455	30	58.7626	30	61.4683	30	23.2866	30	45.044	30	47.7813	30	40.7645	30	37.6114			44.6909	14.9046	3.84835
	35	43.0697	35	52.8139	35	28.8345	35	49.2875	35	23.5867	35	23.6404	35	75.8897	35	29.6577	35	60.2126	35	65.923	35	22.7323	35	40.6276	35	53.3279	35	40.7394	35	39.8196			43.3442	15.7188	4.05857
	40	46.4609	40	52.3451	40	24.1722	40	49.4297	40	24.0193	40	28.774	40	80.6925	40	29.5469	40	62.6026	40	61.7454	40	24.2002	40	58.126	40	58.0663	40	39.3607	40	40.6639			45.3471	16.6141	4.28975
	45	47.6287	45	46.7214	45	26.3722	45	51.9304	45	27.5308	45	42.5902	45	101.081	45	29.8107	45	59.8897	45	58.2351	45	29.5996	45	52.813	45	61.3844	45	44.7449	45	41.4434			48.1184	18.1146	4.67716
	50	55.6549	50	41.545	50	28.3566	50	51.2298	50	25.6172	50	34.655	50	131.8	50	26.3615	50	53.4267	50	63.4963	50	31.0491	50	60.5886	50	46.7811	50	42.8418	50	42.0427			49.0298	25.0724	6.47365
	55	57.1599	55	44.8513	55	32.3573	55	47.8846	55	28.2916	55	27.7071	55	151.641	55	30.4021	55	51.8633	55	69.316	55	31.9499	55	88.9279	55	39.2642	55	42.0077	55	56.9487			53.3715	30.9314	7.98647
	60	64.3623	60	44.1075	60	29.4644	60	47.2515	60	43.1155	60	26.2298	60	148.618	60	31.7951	60	65.1222	60	76.5999	60	33.3931	60	93.3201	60	48.3275	60	65.1437	60	68.8716			59.0482	30.3189	7.82831
	65	106.998	65	64.2114	65	29.3426	65	55.13	65	61.6584	65	39.4019	65	140.198	65	24.6906	65	82.9919	65	113.579	65	50.2155	65	73.7901	65	84.8433	65	98.1144	65	92.4838			74.5099	31.5678	8.15077
	70	120.787	70	107.145	70	32.206	70	78.3018	70	55.452	70	75.6139	70	129.306	70	29.2136	70	96.9641	70	139.813	70	77.9363	70	57.825	70	104.058	70	127.087	70	123.094			90.3202	34.3867	8.8786
	75	124.74	75	141.83	75	41.3293	75	125.377	75	41.8983	75	84.1271	75	114.005	75	53.5545	75	107.308	75	114.379	75	85.7886	75	47.7972	75	94.6763	75	113.736	75	137.718			95.2176	33.5787	8.66999
	80	93.9529	80	73.9391	80	61.0844	80	139.769	80	29.2329	80	64.0049	80	93.5661	80	83.2069	80	104.265	80	87.4646	80	56.592	80	40.3483	80	73.1904	80	71.4265	80	112.191			78.9489	27.1947	7.02163
	85	58.6225	85	56.0131	85	76.0251	85	93.2247	85	22.6925	85	41.3235	85	85.6208	85	85.7122	85	97.3564	85	59.7513	85	33.1205	85	43.208	85	52.3039	85	51.8224	85	92.3178			63.2743	22.8713	5.90535
	90	56.2023	90	54.1775	90	65.516	90	62.9877	90	19.9337	90	38.4966	90	85.5395	90	60.0521	90	88.7633	90	54.5839	90	25.675	90	55.2144	90	44.0493	90	53.1037	90	62.5706			55.1244	17.921	4.62718
	95	66.255	95	43.8004	95	49.7464	95	45.6203	95	20.2621	95	47.1035	95	83.1198	95	42.1448	95	72.8835	95	48.8059	95	24.7797	95	58.3339	95	46.1016	95	45.1617	95	54.5167			49.909	15.6264	4.03471
	100	48.5136	100	43.5591	100	43.8127	100	34.0431	100	18.8326	100	42.1638	100	78.3835	100	38.1469	100	67.9647	100	48.3463	100	22.8874	100	55.8313	100	37.791	100	39.5048	100	52.7323			44.8342	14.7795	3.81604

## Sheet: If Normalised
	0		0		0		0		0		0		0		0		0		0		0		0		0		0		0
	5	147.228	5	142.816	5	92.895	5	116.954	5	123.753	5	94.9189	5	69.0921	5	85.0143	5	96.0641	5	123.042	5	100.672	5	83.0617	5	112.189	5	134.749	5	137.98
	10	152.829	10	148.496	10	96.3623	10	94.0082	10	139.143	10	112.64	10	73.7612	10	118.875	10	115.472	10	160.547	10	123.673	10	120.206	10	79.3474	10	122.656	10	160.955
	15	154.364	15	88.2625	15	64.1904	15	57.0262	15	101.137	15	39.8818	15	73.1505	15	119.889	15	112.638	15	131.816	15	70.7788	15	128.522	15	58.8715	15	69.8269	15	128.285
	20	93.7119	20	64.6661	20	47.3417	20	53.267	20	50.9952	20	23.6519	20	75.2301	20	87.9625	20	87.3274	20	92.0449	20	37.0243	20	90.8965	20	53.2701	20	43.0989	20	67.0227
	25	60.3438	25	55.1205	25	33.6976	25	62.5617	25	34.5123	25	22.4491	25	79.9737	25	52.3149	25	67.5593	25	66.8699	25	24.5966	25	53.6006	25	50.168	25	39.7023	25	45.398
	30	42.963	30	56.802	30	30.9467	30	52.5978	30	26.2438	30	25.9592	30	79.4865	30	40.6455	30	58.7626	30	61.4683	30	23.2866	30	45.044	30	47.7813	30	40.7645	30	37.6114
	35	43.0697	35	52.8139	35	28.8345	35	49.2875	35	23.5867	35	23.6404	35	75.8897	35	29.6577	35	60.2126	35	65.923	35	22.7323	35	40.6276	35	53.3279	35	40.7394	35	39.8196
	40	46.4609	40	52.3451	40	24.1722	40	49.4297	40	24.0193	40	28.774	40	80.6925	40	29.5469	40	62.6026	40	61.7454	40	24.2002	40	58.126	40	58.0663	40	39.3607	40	40.6639
	45	47.6287	45	46.7214	45	26.3722	45	51.9304	45	27.5308	45	42.5902	45	101.081	45	29.8107	45	59.8897	45	58.2351	45	29.5996	45	52.813	45	61.3844	45	44.7449	45	41.4434
	50	55.6549	50	41.545	50	28.3566	50	51.2298	50	25.6172	50	34.655	50	131.8	50	26.3615	50	53.4267	50	63.4963	50	31.0491	50	60.5886	50	46.7811	50	42.8418	50	42.0427
	55	57.1599	55	44.8513	55	32.3573	55	47.8846	55	28.2916	55	27.7071	55	151.641	55	30.4021	55	51.8633	55	69.316	55	31.9499	55	88.9279	55	39.2642	55	42.0077	55	56.9487
	60	64.3623	60	44.1075	60	29.4644	60	47.2515	60	43.1155	60	26.2298	60	148.618	60	31.7951	60	65.1222	60	76.5999	60	33.3931	60	93.3201	60	48.3275	60	65.1437	60	68.8716
	65	106.998	65	64.2114	65	29.3426	65	55.13	65	61.6584	65	39.4019	65	140.198	65	24.6906	65	82.9919	65	113.579	65	50.2155	65	73.7901	65	84.8433	65	98.1144	65	92.4838
	70	120.787	70	107.145	70	32.206	70	78.3018	70	55.452	70	75.6139	70	129.306	70	29.2136	70	96.9641	70	139.813	70	77.9363	70	57.825	70	104.058	70	127.087	70	123.094
	75	124.74	75	141.83	75	41.3293	75	125.377	75	41.8983	75	84.1271	75	114.005	75	53.5545	75	107.308	75	114.379	75	85.7886	75	47.7972	75	94.6763	75	113.736	75	137.718
	80	93.9529	80	73.9391	80	61.0844	80	139.769	80	29.2329	80	64.0049	80	93.5661	80	83.2069	80	104.265	80	87.4646	80	56.592	80	40.3483	80	73.1904	80	71.4265	80	112.191
	85	58.6225	85	56.0131	85	76.0251	85	93.2247	85	22.6925	85	41.3235	85	85.6208	85	85.7122	85	97.3564	85	59.7513	85	33.1205	85	43.208	85	52.3039	85	51.8224	85	92.3178
	90	56.2023	90	54.1775	90	65.516	90	62.9877	90	19.9337	90	38.4966	90	85.5395	90	60.0521	90	88.7633	90	54.5839	90	25.675	90	55.2144	90	44.0493	90	53.1037	90	62.5706
	95	66.255	95	43.8004	95	49.7464	95	45.6203	95	20.2621	95	47.1035	95	83.1198	95	42.1448	95	72.8835	95	48.8059	95	24.7797	95	58.3339	95	46.1016	95	45.1617	95	54.5167
	100	48.5136	100	43.5591	100	43.8127	100	34.0431	100	18.8326	100	42.1638	100	78.3835	100	38.1469	100	67.9647	100	48.3463	100	22.8874	100	55.8313	100	37.791	100	39.5048	100	52.7323
	0		0		0		0		0		0		0		0		0		0		0		0		0		0		0				Mean	STDDEV	SEM
	5	1	5	1	5	1	5	1	5	1	5	1	5	1	5	1	5	1	5	1	5	1	5	1	5	1	5	1	5	1		IF	1	0	0
	10	1.03804	10	1.03977	10	1.03732	10	0.803805	10	1.12436	10	1.1867	10	1.06758	10	1.39829	10	1.20203	10	1.30481	10	1.22848	10	1.44719	10	0.707264	10	0.91026	10	1.16651			1.11083	0.196567	0.0507534
	15	1.04847	15	0.618013	15	0.690999	15	0.487595	15	0.817247	15	0.420167	15	1.05874	15	1.41022	15	1.17253	15	1.07131	15	0.703062	15	1.54731	15	0.524752	15	0.518202	15	0.929733			0.867891	0.333801	0.0861872
	20	0.63651	20	0.452792	20	0.509625	20	0.455453	20	0.412072	20	0.24918	20	1.08884	20	1.03468	20	0.909053	20	0.748075	20	0.36777	20	1.09433	20	0.474824	20	0.319847	20	0.485742			0.615919	0.277789	0.0717249
	25	0.409867	25	0.385954	25	0.362749	25	0.534925	25	0.278881	25	0.236508	25	1.15749	25	0.615367	25	0.703273	25	0.543471	25	0.244324	25	0.645311	25	0.447173	25	0.29464	25	0.329019			0.479264	0.23131	0.0597239
	30	0.291813	30	0.397727	30	0.333136	30	0.44973	30	0.212066	30	0.273489	30	1.15044	30	0.478102	30	0.611702	30	0.49957	30	0.231311	30	0.542296	30	0.425899	30	0.302522	30	0.272586			0.431493	0.224233	0.0578968
	35	0.292538	35	0.369802	35	0.310398	35	0.421426	35	0.190595	35	0.249059	35	1.09839	35	0.348855	35	0.626797	35	0.535775	35	0.225805	35	0.489126	35	0.475339	35	0.302337	35	0.288589			0.414988	0.217617	0.0561884
	40	0.315572	40	0.36652	40	0.26021	40	0.422642	40	0.19409	40	0.303143	40	1.1679	40	0.347552	40	0.651675	40	0.501823	40	0.240386	40	0.699794	40	0.517575	40	0.292105	40	0.294708			0.43838	0.241664	0.0623973
	45	0.323504	45	0.327143	45	0.283892	45	0.444024	45	0.222466	45	0.448701	45	1.46299	45	0.350656	45	0.623434	45	0.473293	45	0.294019	45	0.635829	45	0.547151	45	0.332062	45	0.300358			0.471301	0.29154	0.0752753
	50	0.378019	50	0.290898	50	0.305254	50	0.438034	50	0.207002	50	0.365102	50	1.9076	50	0.310083	50	0.556157	50	0.516052	50	0.308418	50	0.729441	50	0.416984	50	0.317939	50	0.304701			0.490112	0.399273	0.103092
	55	0.388241	55	0.314048	55	0.348321	55	0.409431	55	0.228614	55	0.291903	55	2.19476	55	0.357612	55	0.539882	55	0.563351	55	0.317366	55	1.07062	55	0.349982	55	0.311749	55	0.412731			0.539908	0.482629	0.124614
	60	0.437161	60	0.30884	60	0.317179	60	0.404017	60	0.3484	60	0.27634	60	2.15102	60	0.373998	60	0.677904	60	0.622549	60	0.331702	60	1.1235	60	0.430768	60	0.483447	60	0.499141			0.585731	0.465936	0.120304
	65	0.72675	65	0.449608	65	0.315868	65	0.471382	65	0.498238	65	0.415112	65	2.02915	65	0.290429	65	0.863922	65	0.923088	65	0.498802	65	0.888377	65	0.756252	65	0.728129	65	0.670269			0.701692	0.406357	0.104921
	70	0.82041	70	0.75023	70	0.346692	70	0.669509	70	0.448086	70	0.796616	70	1.8715	70	0.343631	70	1.00937	70	1.1363	70	0.774159	70	0.69617	70	0.927519	70	0.943143	70	0.892118			0.828364	0.356577	0.0920678
	75	0.847262	75	0.993092	75	0.444904	75	1.07202	75	0.338564	75	0.886305	75	1.65005	75	0.629948	75	1.11704	75	0.929589	75	0.852157	75	0.575442	75	0.843899	75	0.844059	75	0.998099			0.868162	0.300594	0.077613
	80	0.638147	80	0.517721	80	0.657564	80	1.19508	80	0.23622	80	0.674311	80	1.35422	80	0.978741	80	1.08537	80	0.71085	80	0.562141	80	0.485763	80	0.652384	80	0.530073	80	0.813092			0.739445	0.287464	0.0742229
	85	0.398175	85	0.392203	85	0.818398	85	0.797106	85	0.18337	85	0.435356	85	1.23923	85	1.00821	85	1.01345	85	0.485616	85	0.328993	85	0.520191	85	0.466211	85	0.384586	85	0.669066			0.609344	0.291891	0.0753658
	90	0.381737	90	0.37935	90	0.705269	90	0.538568	90	0.161077	90	0.405574	90	1.23805	90	0.706377	90	0.924001	90	0.443619	90	0.255035	90	0.66474	90	0.392634	90	0.394095	90	0.453476			0.53624	0.265653	0.0685912
	95	0.450017	95	0.30669	95	0.535512	95	0.39007	95	0.16373	95	0.49625	95	1.20303	95	0.495738	95	0.758697	95	0.396659	95	0.246142	95	0.702296	95	0.410927	95	0.335155	95	0.395106			0.485735	0.243119	0.062773
	100	0.329514	100	0.305001	100	0.471637	100	0.291081	100	0.152179	100	0.444208	100	1.13448	100	0.448712	100	0.707493	100	0.392924	100	0.227345	100	0.672167	100	0.336851	100	0.293174	100	0.382173			0.439263	0.234843	0.0606363

## Sheet: Summary
% Chromosome Length		Mean	STDDEV	SEM		Mean	STDDEV	SEM
0-5	IF	1	0	0	FISH	68.8653	18.9925	4.90384
5-10		1.11083	0.196567	0.0507534		64.9575	19.3608	4.99895
10-15		0.867891	0.333801	0.0861872		67.4228	19.7201	5.0917
15-20		0.615919	0.277789	0.0717249		71.6387	25.6331	6.61843
20-25		0.479264	0.23131	0.0597239		68.0383	24.968	6.4467
25-30		0.431493	0.224233	0.0578968		66.5489	22.6542	5.8493
30-35		0.414988	0.217617	0.0561884		65.093	18.1376	4.6831
35-40		0.43838	0.241664	0.0623973		66.3141	19.9139	5.14174
40-45		0.471301	0.29154	0.0752753		73.5137	28.4059	7.33437
45-50		0.490112	0.399273	0.103092		84.7344	47.3036	12.2137
50-55		0.539908	0.482629	0.124614		93.5754	46.7585	12.073
55-60		0.585731	0.465936	0.120304		110.557	50.314	12.991
60-65		0.701692	0.406357	0.104921		130.361	53.2582	13.7512
65-70		0.828364	0.356577	0.0920678		151.928	48.0975	12.4187
70-75		0.868162	0.300594	0.077613		159.247	55.8541	14.4215
75-80		0.739445	0.287464	0.0742229		146.841	48.6546	12.5626
80-85		0.609344	0.291891	0.0753658		119.193	53.2241	13.7424
85-90		0.53624	0.265653	0.0685912		94.6221	45.385	11.7184
90-95		0.485735	0.243119	0.062773		75.973	37.2442	9.61641
95-100		0.439263	0.234843	0.0606363		65.1024	28.7287	7.41771
