# Supplementary material for: Large domains of heterochromatin direct the formation of short mitotic chromosome loops
Source: eLife. 2020 Sep 11;9:e57212. doi: 10.7554/eLife.57212 (PMC7515631; doi:10.7554/eLife.57212)
Supplement: Figure 2—source data 3. [file elife-57212-fig2-data3.xlsx]

## Sheet: All data
	2	FISH	IF	4	FISH	IF	8	FISH	IF	9	FISH	IF	12	FISH	IF	13	FISH	IF	14	FISH	IF	15	FISH	IF	16	FISH	IF	17	FISH	IF	19	FISH	IF	20	FISH	IF	22	FISH	IF	23	FISH	IF
	X	Y	Y	X	Y	Y	X	Y	Y	X	Y	Y	X	Y	Y	X	Y	Y	X	Y	Y	X	Y	Y	X	Y	Y	X	Y	Y	X	Y	Y	X	Y	Y	X	Y	Y	X	Y	Y
0	0	4	10	0	3	21	0	13	22	0	3	32	0	10.5	21	0	6	53	0	11.3333	69.6667	0	8	34	0	15	121	0	3	9	0	9	30	0	4	18	0	5.4444	46.2222	0	5	20
1	1.78571	3.0077	12.1237	0.787402	4.1364	22.1349	1.0989	9.9436	21.9998	1.38889	2.4917	37.1555	1.42857	10.1463	21.7071	1.51515	5.2137	50.245	1.38889	9.3763	62.4302	1.5625	7.0668	40.8906	1.53846	16.8143	118.802	0.943396	3.4918	9.7704	1.85185	9.0436	36.6691	0.909091	4.9348	17.0652	1.25	5.0881	49.5095	0.943396	4.2216	19.5141
2	3.57143	3	12.2857	1.5748	4.7001	22.291	2.1978	13.7354	22.2485	2.77778	3	44.75	2.85714	8.4141	21.8286	3.0303	5.2356	48.4513	2.77778	10.1193	52.1492	3.125	7.7338	48.6477	3.07692	19.9592	114.104	1.88679	3.6088	10.1271	3.7037	9.6092	45.4315	1.81818	4.1297	18.9925	2.5	4.9885	55.974	1.88679	4.72	21.4002
3	5.35714	3.9732	14.375	2.3622	4.018	22.982	3.2967	13.4397	23.9905	4.16667	3	55.0829	4.28571	8.4308	21.4237	4.54545	5.8535	47.9364	4.16667	9.0833	45.9572	4.6875	7.8947	60.063	4.61538	19.4923	106.774	2.83019	3.6302	10.2849	5.55556	9.9722	55.6864	2.72727	4.1901	19.1889	3.75	4.9792	59.5581	2.83019	5.315	20.9449
4	7.14286	3.0357	16.3622	3.14961	4	25.1581	4.3956	10.5205	24.9922	5.55556	3	73.2948	5.71429	7.8286	20.6571	6.06061	5.6656	47.4299	5.55556	9.5741	46.4527	6.25	7.5263	70.2888	6.15385	19.4058	100.614	3.77358	3.0365	10.9635	7.40741	9.152	72.6908	3.63636	4.994	20.2454	5	4.7764	64.9056	3.77358	5.346	21.7338
5	8.92857	3	20.2436	3.93701	4.9468	26.3678	5.49451	12.0503	25.6177	6.94444	3	94.1595	7.14286	7.3827	22.5714	7.57576	6.8693	46.6508	6.94444	8.1714	47.2217	7.8125	7.8269	79.7816	7.69231	19.3895	90.0324	4.71698	3.1918	11.1635	9.25926	8.822	86.9229	4.54545	4.6864	23.963	6.25	4.918	73.5664	4.71698	6.0739	21.2549
6	10.7143	3.8112	24.6352	4.72441	4.0638	28.0389	6.59341	11.9986	26.7369	8.33333	3	110.287	8.57143	6.8161	24.4267	9.09091	8.2254	48.9404	8.33333	8.0185	52.0185	9.375	8.7875	91.4944	9.23077	19.0323	82.4851	5.66038	3.9359	11.9359	11.1111	9.0669	98.2113	5.45455	4.6198	26.9638	7.5	5	86.9056	5.66038	5.7701	21.2149
7	12.5	4	29.6875	5.51181	4	30.7622	7.69231	10.5829	28.971	9.72222	3.1676	125.786	10	6.04	27.74	10.6061	9.6837	52.081	9.72222	9.7119	58.3555	10.9375	7.5776	92.3447	10.7692	16.2067	79.412	6.60377	4.2597	11.5067	12.963	10.1944	103.852	6.36364	5.4311	29.8465	8.75	4.7506	106.207	6.60377	5.0074	21.3661
8	14.2857	3.0612	32.7857	6.29921	4.15	34.4955	8.79121	11.9747	31.9513	11.1111	3.9506	134.161	11.4286	6.1571	36.311	12.1212	10.3647	56.0429	11.1111	8.107	63.5638	12.5	8.8599	93.0798	12.3077	15.8077	78.8771	7.54717	4.747	12.0175	14.8148	10.7142	103.036	7.27273	4.523	36.4161	10	4.9167	124.9	7.54717	5.0266	22.5342
9	16.0714	3.9196	34.9707	7.08661	4.0296	39.1469	9.89011	11.4506	30.899	12.5	3.2383	144.09	12.8571	6.8441	46.9251	13.6364	9.3188	57.386	12.5	8.8438	67.2917	14.0625	7.8078	94.772	13.8462	15.007	80.7715	8.49057	4.0168	12.6961	16.6667	11.0584	104.327	8.18182	4.5703	42.1804	11.25	4.8895	140.562	8.49057	5	21.4123
10	17.8571	3.4796	32.7628	7.87402	4	44.8649	10.989	13.6966	33.9368	13.8889	3.2351	155.452	14.2857	5.9337	57.0714	15.1515	7.8218	59.2722	13.8889	8.0098	68.8374	15.625	7.6537	97.1984	15.3846	15	78.8279	9.43396	4.1134	14.4088	18.5185	11.4954	105.532	9.09091	4.9926	51.3537	12.5	5	153.875	9.43396	5.4339	21.7764
11	19.6429	3.9579	30.4962	8.66142	4.5302	53.1942	12.0879	12.3525	35.9572	15.2778	3.8984	158.739	15.7143	6	64.6206	16.6667	7.0715	56.286	15.2778	8.2778	68.3301	17.1875	8.277	99.9469	16.9231	12.8538	79.016	10.3774	4.4748	15.9822	20.3704	11.5346	105.127	10	5	60.8854	13.75	4.4792	162.56	10.3774	5.2806	21.6239
12	21.4286	4.6378	28.5816	9.44882	4.0952	59.2825	13.1868	11.7603	39.9065	16.6667	4.0139	168.549	17.1429	6	71.4498	18.1818	6.1503	55.7675	16.6667	8.6667	74.0741	18.75	8.0036	103	18.4615	12.1876	76.2906	11.3208	4.9167	19.0566	22.2222	12.7029	106.599	10.9091	5	71.5077	15	4.2514	168.343	11.3208	4.8095	21.6301
13	23.2143	4.9834	27.588	10.2362	3.9064	61.3338	14.2857	12.9699	42.7398	18.0556	4.2294	170.936	18.5714	6.9429	76.9539	19.697	5.2468	51.4677	18.0556	7.9906	79.8434	20.3125	8.7499	102.96	20	12.682	71.4502	12.2642	4.4009	23.5519	24.0741	14.4834	106.715	11.8182	5	75.3759	16.25	5	170.813	12.2642	4.9433	21.8891
14	25	5	26.125	11.0236	3.1804	65.463	15.3846	11.1778	46.7642	19.4444	3.9342	168.756	20	6.18	81.75	21.2121	5.9945	48.6951	19.4444	8.1055	86.5514	21.875	9.8419	103.972	21.5385	11.5921	71.6223	13.2075	4.5498	29.0935	25.9259	14.8902	104.97	12.7273	4.8903	75.9905	17.5	5	176.23	13.2075	6.3936	22.144
15	26.7857	5	27.0944	11.811	3.1824	62.7469	16.4835	12.8186	48.9397	20.8333	4.2292	158.731	21.4286	6.9133	88.7857	22.7273	5.5753	48.6922	20.8333	8.4734	91.8414	23.4375	9.4772	104.483	23.0769	11.3348	70.3984	14.1509	4.4245	34.5283	27.7778	15.4796	102.213	13.6364	4.0287	79.6873	18.75	5.9957	169.026	14.1509	5.7248	20.4391
16	28.5714	5.8571	26.2041	12.5984	3.6135	63.253	17.5824	11.0641	49.9688	22.2222	4.4414	142.46	22.8571	6.4416	96.8857	24.2424	5.8083	50.7889	22.2222	9.0412	94.4691	25	9.1476	96.1048	24.6154	11.6467	73.138	15.0943	3.8561	38.7547	29.6296	16.0002	94.2946	14.5455	3.9866	71.3166	20	6.3556	162.911	15.0943	6.1067	20.1062
17	30.3571	6.3635	25.2296	13.3858	3.483	60.6172	18.6813	12.8734	46.9785	23.6111	4	126.283	24.2857	6.7763	104.341	25.7576	5.6856	53.1923	23.6111	9.4289	94.1283	26.5625	10.3742	87.128	26.1538	11.0971	70.7033	16.0377	4	40.5238	31.4815	16.8606	88.7884	15.4545	3.1061	63.6514	21.25	6	161.061	16.0377	6.3177	19.9161
18	32.1429	6.9311	25.2168	14.1732	3.927	60.4756	19.7802	12.8772	44.943	25	4.3281	113.891	25.7143	8.4571	109.286	27.2727	6	54.4232	25	11.125	93.625	28.125	11.7739	81.3575	27.6923	10.5032	72.4687	16.9811	4.4258	39.6251	33.3333	20.3286	86.2636	16.3636	3.0051	59.0191	22.5	5.5417	158.374	16.9811	5.4002	20.1224
19	33.9286	7.8304	25.213	14.9606	3.3902	59.228	20.8791	11.7805	46.0275	26.3889	4.0368	108.47	27.1429	8.6131	108.758	28.7879	6	53.6842	26.3889	11.2079	88.6713	29.6875	12.0307	76.3943	29.2308	11.3561	73.5858	17.9245	4.3507	40.0823	35.1852	21.0711	82.0077	17.2727	3.1961	54.2183	23.75	5.0194	152.694	17.9245	5.2298	19.5372
20	35.7143	8.8214	24.3214	15.748	3.8064	59.0518	21.978	10.7913	43.8307	27.7778	4.9722	107.262	28.5714	8.6939	102.194	30.303	6.0975	55.8416	27.7778	12.0412	84.463	31.25	13.004	72.9451	30.7692	11.7449	73.55	18.8679	4.4536	41.68	37.037	21.9818	80.5753	18.1818	3.0107	51.457	25	4.7083	149.458	18.8679	6.315	19.2186
21	37.5	9.8125	21.5625	16.5354	4	59.2339	23.0769	11.659	41.4073	29.1667	4.5707	103.609	30	9.21	95.72	31.8182	6.0132	57.0379	29.1667	11.9456	80.9491	32.8125	17.0056	68.052	32.3077	11.6129	74.9843	19.8113	4.1065	42.9528	38.8889	22.7839	76.2765	19.0909	3	50.0621	26.25	4.7167	145.738	19.8113	5.9807	19.8103
22	39.2857	11.0332	20.7143	17.3228	4	62.5594	24.1758	12.3404	39.1016	30.5556	4.163	101.263	31.4286	10.3104	90.1649	33.3333	6.5921	60.3132	30.5556	11.1703	77.1034	34.375	22.122	60.5637	33.8462	13.4485	77.2845	20.7547	4	43.818	40.7407	25.0819	76.2344	20	3	47.8939	27.5	5.4309	138.573	20.7547	5.3731	20.7982
23	41.0714	11.912	19.861	18.1102	4	67.9332	25.2747	14.3451	39.9552	31.9444	5.0278	99.324	32.8571	10.8641	85.4212	34.8485	7.2594	57.2526	31.9444	12.5649	76.9356	35.9375	24.4462	53.3847	35.3846	16.6072	87.2532	21.6981	4.4914	44.3042	42.5926	29.3647	75.2054	20.9091	3.5175	47.3972	28.75	5.2701	133.279	21.6981	5.3389	21.3223
24	42.8571	13.9082	20.3571	18.8976	4.3662	71.2259	26.3736	14.4859	39.0467	33.3333	5.6667	96.1111	34.2857	12.4596	84.3992	36.3636	7.2564	54.5536	33.3333	12.8148	76.7778	37.5	29.29	51.1789	36.9231	21.2831	95.2648	22.6415	4.346	45.0061	44.4444	33.6722	75.3506	21.8182	3.0231	47.0666	30	6.8056	123.856	22.6415	5.5	21.9993
25	44.6429	15.3482	21.6492	19.685	4.1695	74.8799	27.4725	15.8283	38.1618	34.7222	5.4185	94.7991	35.7143	13.2653	88.5714	37.8788	8.6207	51.3682	34.7222	15.7874	78.3597	39.0625	51.7616	50.7974	38.4615	26.702	104.324	23.5849	4.2503	44.6535	46.2963	39.5463	76.7427	22.7273	3	45.5039	31.25	6.4839	102.549	23.5849	5.3553	21.3563
26	46.4286	16.9209	21.4515	20.4724	4.5663	75.5645	28.5714	16.219	38.2437	36.1111	5.7232	87.8821	37.1429	13.0439	92.6227	39.3939	9.1478	49.7318	36.1111	20.3601	79.036	40.625	80.0783	53.0211	40	32.9343	103.878	24.5283	4.9686	47.2203	48.1481	52.2584	76.8217	23.6364	3	48.1958	32.5	6.3677	90.2948	24.5283	5.497	20.9705
27	48.2143	20.1786	22.6607	21.2598	4.9283	72.2009	29.6703	21.4546	38.0194	37.5	5.918	82.168	38.5714	12.3084	94.6884	40.9091	11.8718	48.3082	37.5	29.6771	83.1146	42.1875	98.2737	56.0324	41.5385	39.4258	103.276	25.4717	4.1514	48	50	79.6392	74.9625	24.5455	3	48.688	33.75	8.2546	82.1408	25.4717	6.8616	21.1263
28	50	24.75	23.75	22.0472	4.8743	69.5519	30.7692	26.9404	38	38.8889	6.1944	77.3086	40	12.18	93.16	42.4242	13.6031	45.9899	38.8889	40.3477	83.0103	43.75	95.8439	59.5233	43.0769	47.3982	96.0751	26.4151	4	50.0013	51.8519	131.488	74.3722	25.4545	3	50.8748	35	8.6333	83.5736	26.4151	6	21.7785
29	51.7857	28.9962	24.6352	22.8346	5.2528	64.6999	31.8681	32.3804	38.9435	40.2778	6.697	75.3143	41.4286	11.3661	87.5804	43.9394	15.5701	44.5272	40.2778	60.7497	77.089	45.3125	76.312	60.3053	44.6154	55.1394	89.2208	27.3585	4	51.1533	53.7037	192.418	76.0421	26.3636	3	47.0801	36.25	10.1776	88.1333	27.3585	6.2468	20.1182
30	53.5714	35.8291	25.2372	23.622	4.8379	60.8412	32.967	36.2601	42.1606	41.6667	7	79.6337	42.8571	10.8316	80.4949	45.4545	16.5346	41.6967	41.6667	115.046	74.9259	46.875	54.5845	60.1523	46.1538	56.6998	82.3519	28.3019	4.0961	50.9074	55.5556	238.834	80.7404	27.2727	2.1534	43.3283	37.5	11.7083	90.5573	28.3019	8.1833	20.7699
31	55.3571	44.6913	26.0727	24.4094	4.8317	58.9741	34.0659	34.0067	41.163	43.0556	7.4273	83.0449	44.2857	10.25	75.9484	46.9697	18.6092	39.9805	43.0556	159.138	75.4154	48.4375	51.996	61.4096	47.6923	53.1642	71.978	29.2453	4.1862	49.3245	57.4074	247.934	78.4257	28.1818	3.8442	41.0933	38.75	11.8298	97.1874	29.2453	10.0357	19.7655
32	57.1429	55.2041	26.4694	25.1969	5.4325	57.8271	35.1648	27.4318	39.1322	44.4444	8.0401	88.4938	45.7143	11.4853	76.3237	48.4848	22.652	38.0101	44.4444	172.222	82.4938	50	56.6708	59.6394	49.2308	49.6772	64.8121	30.1887	4.6541	49.1108	59.2593	222.657	74.4396	29.0909	3.0625	39.1857	40	14.2	98.4	30.1887	8.4207	18.3964
33	58.9286	72.9311	25.7819	25.9843	5.8013	56.7356	36.2637	23.6061	39.524	45.8333	9.1875	91.464	47.1429	11.7284	76	50	27.0525	35.1345	45.8333	135.05	90.7211	51.5625	59.889	55.9247	50.7692	44.8282	62.239	31.1321	4.5655	46.1229	61.1111	172.79	71.6092	30	3	39.8608	41.25	16.0815	99.971	31.1321	9.8064	19.6344
34	60.7143	101.775	23.8929	26.7717	5.9808	56.8318	37.3626	16.7969	39.9318	47.2222	10.4111	95.7502	48.5714	12.1678	76	51.5152	27.8894	40.1426	47.2222	75.1337	94.2994	53.125	59.6844	54.0546	52.3077	43.7893	61.9574	32.0755	4.5671	44.0209	62.963	128.623	67.2225	30.9091	3.1438	40.421	42.5	16.1986	102.364	32.0755	8.376	18.7348
35	62.5	134.625	21.625	27.5591	6.5671	57.1121	38.4615	16.623	39.2319	48.6111	11.6042	99.3687	50	15	75.75	53.0303	25.1102	41.7013	48.6111	39.3108	96.9065	54.6875	62.5518	53.7743	53.8462	46.3572	61.4481	33.0189	4.0346	43.0856	64.8148	104.161	63.1618	31.8182	3.0153	41.5829	43.75	16.2669	107.206	33.0189	7.2668	18.3425
36	64.2857	148.056	18.7296	28.3465	7.5248	58.5263	39.5604	15.4015	39.817	50	11.5	102.375	51.4286	16.4767	79.6412	54.5455	21.3936	41.4108	50	29.8333	98	56.25	68.8995	53.6405	55.3846	49.0955	60.3337	33.9623	4	43.4995	66.6667	87.6273	59.3409	32.7273	3	45.0324	45	18.5708	105.736	33.9623	7.0423	18.5997
37	66.0714	136.654	17.0446	29.1339	8.3121	60.3556	40.6593	15.4118	38.1568	51.3889	12.0576	105.713	52.8571	20.3427	83.542	56.0606	19.6242	41.602	51.3889	30.965	100.785	57.8125	83.8119	50.4552	56.9231	49.9786	60.2568	34.9057	4.1926	44.2312	68.5185	81.0341	58.0369	33.6364	3.6068	48.4403	46.25	21.4017	107.469	34.9057	7.333	18.0762
38	67.8571	109.763	14.8724	29.9213	9.3293	62.5502	41.7582	14.2173	37.3452	52.7778	13.0556	108.128	54.2857	22.7263	86.5398	57.5758	19.1888	41.1816	52.7778	27.4959	96.9892	59.375	100.795	46.4443	58.4615	45.2623	62.4254	35.8491	4.2054	44.9453	70.3704	84.9649	55.6281	34.5455	3.0452	51.9633	47.5	22.6333	111.3	35.8491	7.1222	18.4607
39	69.6429	78.727	14	30.7087	10.5287	63.9097	42.8571	14.4558	36.226	54.1667	14.898	111.329	55.7143	25.9651	83.1904	59.0909	19.4933	38.9015	54.1667	26.9317	92.9873	60.9375	105.256	40.9046	60	37.6537	65.0422	36.7925	4.0989	46.0045	72.2222	82.9229	51.8675	35.4545	3	52.3606	48.75	23.7375	120.047	36.7925	7.9337	17.4681
40	71.4286	53.2551	14.4592	31.4961	11.1155	64.5353	43.956	13.9955	35.9798	55.5556	16.7778	109.852	57.1429	31.3367	77.1633	60.6061	26.874	37.5157	55.5556	28.3909	86.0782	62.5	96.7266	37.6871	61.5385	32.978	69.3251	37.7358	4	43.9277	74.0741	87.0327	48.8883	36.3636	3	49.4224	50	25.3889	131.25	37.7358	7.4326	17.0473
41	73.2143	40.5906	15.6722	32.2835	11.7061	68.3559	45.0549	14.074	35.7616	56.9444	18.8472	100.31	58.5714	38.1786	69.5265	62.1212	40.7194	36.9119	56.9444	32.3525	82.4774	64.0625	80.4798	37.0939	63.0769	30.235	78.2127	38.6792	4.5881	41.4475	75.9259	102.544	45.561	37.2727	3.3689	46.6389	51.25	26.7966	137.714	38.6792	6.9435	17.4776
42	75	32.375	18.5	33.0709	9.8718	70.1396	46.1538	13.5468	35.1925	58.3333	20.3333	87.9323	60	43.72	67.42	63.6364	47.6245	35.1048	58.3333	37.4167	77.7176	65.625	63.2032	36.5521	64.6154	27.1237	91.7338	39.6226	4.6415	37.8491	77.7778	125.106	43.0354	38.1818	3.9442	41.4765	52.5	28.725	144.167	39.6226	6.6187	17.6187
43	76.7857	27.3163	23.6084	33.8583	9.1969	69.5119	47.2527	14.5327	34.8457	59.7222	20.9697	79.6016	61.4286	57.5502	68.9071	65.1515	44.2653	33.2876	59.7222	45.2443	76.1777	67.1875	52.6976	35.8797	66.1538	23.9202	110.263	40.566	4	35.2166	79.6296	135.189	41.5141	39.0909	4	36.0215	53.75	31.6277	140.941	40.566	7.0717	18
44	78.5714	23.9184	26.6684	34.6457	8.3308	68.6692	48.3516	14.9929	35.0012	61.1111	23.0015	72.0864	62.8571	79.9057	68.7273	66.6667	33.5173	32.8023	61.1111	48.7963	74.8416	68.75	40.5385	35.0479	67.6923	21.1074	132.362	41.5094	4.0881	35.6492	81.4815	120.603	42.3558	40	4	32.496	55	37.2792	134.417	41.5094	7.6754	18
45	80.3571	21.4043	28.2832	35.4331	7.7078	69.5804	49.4505	15.5278	36.7967	62.5	25.9375	59.4375	64.2857	96.6531	66.4745	68.1818	24.5685	30.388	62.5	48.3125	75.9375	70.3125	37.2244	35.4251	69.2308	18.9761	151.788	42.4528	4.9097	35.0337	83.3333	93.9537	43.4123	40.9091	4.9096	30.6984	56.25	43.3668	116.987	42.4528	7.9961	17.8827
46	82.1429	19.3929	30.6582	36.2205	7	70.114	50.5495	14.2785	37.7433	63.8889	34.8899	50.9693	65.7143	106.777	61.1047	69.697	23.2883	29.6301	63.8889	44.2541	74.213	71.875	32.4631	35.8679	70.7692	17.3683	166.582	43.3962	5	34.5162	85.1852	74.3104	44.4358	41.8182	4.1698	27.4235	57.5	50.424	103.442	43.3962	7.7499	16.9164
47	83.9286	17.7194	32.6403	37.0079	6.9763	70.7412	51.6484	12.4654	39.0659	65.2778	45.1838	49.2759	67.1429	113.825	55.2002	71.2121	23.1362	29.8525	65.2778	41.7339	66.1941	73.4375	29.394	36.0419	72.3077	16.5167	179.53	44.3396	4.7925	34.788	87.037	72.957	44.9768	42.7273	4.9274	27.8878	58.75	69.7602	89.6542	44.3396	8.0285	16.1013
48	85.7143	16.4286	34.4694	37.7953	7.3083	70.6464	52.7473	14.3018	40.4272	66.6667	57.7222	47.6667	68.5714	113.292	49.6461	72.7273	23.141	30.6173	66.6667	43.7037	58.2593	75	27.2658	38.2877	73.8462	15.2488	183.323	45.283	4.6604	32.7601	88.8889	82.4822	44.6507	43.6364	5	28.9075	60	88.2444	81.2222	45.283	8.2082	15
49	87.5	15.4375	35.4375	38.5827	7.1489	67.5743	53.8462	15.2478	41.863	68.0556	65.2676	47.2431	70	103.43	43.83	74.2424	23.9054	30.4685	68.0556	46.6202	49.8846	76.5625	25.9966	45.5655	75.3846	13.7301	179.062	46.2264	5.5412	32.0695	90.7407	87.0713	43.9411	44.5455	5	27.386	61.25	93.1201	71.756	46.2264	8.3996	14.6566
50	89.2857	14.574	36.0281	39.3701	7	65.5131	54.9451	14.6212	44.1099	69.4444	59.4342	48.2288	71.4286	86.898	39.0561	75.7576	23.198	29.4953	69.4444	52.3266	45.2819	78.125	23.0077	50.4174	76.9231	12.5716	176.39	47.1698	5.5611	30.956	92.5926	76.8779	42.5811	45.4545	5.7482	29.7324	62.5	78.7969	64.9271	47.1698	10.6262	11.9848
51	91.0714	14	37.0255	40.1575	7.4559	62.844	56.044	15.8362	46.9184	70.8333	49.6875	49.2248	72.8571	70.3212	35.5	77.2727	20.6734	30.1183	70.8333	68.8171	45.2002	79.6875	23.5552	53.7858	78.4615	12.6415	170.659	48.1132	6.4269	29.9034	94.4444	59.5837	41.2017	46.3636	6.6659	29.5182	63.75	56.5574	60.6538	48.1132	14.6711	11.6998
52	92.8571	13.3878	37.352	40.9449	7.2258	60.3231	57.1429	21.2741	47.0199	72.2222	39.3611	55.6505	74.2857	60.0898	35.7518	78.7879	20.0579	32.0265	72.2222	93.9877	43.714	81.25	21.3718	55.4858	80	12.3147	162.749	49.0566	7.1321	30.6223	96.2963	46.4539	40.9186	47.2727	6.0737	30.8526	65	49.7208	57.6667	49.0566	15.1772	10.0452
53	94.6429	12.3151	37.639	41.7323	7.7861	60.6971	58.2418	21.7857	47.5536	73.6111	35.1723	62.668	75.7143	52.6061	39.2718	80.303	18.8073	36.1403	73.6111	104.109	45.601	82.8125	18.9536	55.5779	81.5385	12.6954	155.539	50	7	30.0278	98.1481	36.8606	40.3837	48.1818	7.5338	31.3202	66.25	48.7016	55.5151	50	16.5929	9.8699
54	96.4286	10.6786	37.3444	42.5197	9.7169	58.994	59.3407	22.4734	48.0232	75	35.8125	73.125	77.1429	46.8143	45.7429	81.8182	16.9809	42.147	75	98.1667	45.5417	84.375	17.8144	58.4287	83.0769	11.8985	151.792	50.9434	6.8679	32.053	100	32.9395	41.5559	49.0909	7.983	31.9372	67.5	45.7823	52.9424	50.9434	21.1628	9.0148
55	98.2143	8.9847	36.4911	43.3071	10.0628	57.2594	60.4396	23.2644	47.7753	76.3889	35.382	86.0458	78.5714	41.0153	53.4541	83.3333	14.1904	45.6838	76.3889	78.3266	51.5013	85.9375	14.9276	64.1221	84.6154	11.6714	145.155	51.8868	7.1101	33.6632				50	9.3475	31.542	68.75	45.0208	50.3911	51.8868	22.7498	9
56	100	7.5	34	44.0945	11.501	60.5473	61.5385	27.2194	48.0175	77.7778	31.6914	97.8519	80	36.52	65.02	84.8485	12.5973	47.6507	77.7778	73.856	61.6296	87.5	14.0795	68.7386	86.1538	11.1069	142.726	52.8302	7.4955	35.425				50.9091	9.8524	31.1476	70	45.4667	48.8167	52.8302	27.7087	9
57				44.8819	9.9331	63.7094	62.6374	35.5853	46.4117	79.1667	29.4023	106.554	81.4286	32.25	85.1863	86.3636	12.4914	47.81	79.1667	70.7569	71.2627	89.0625	13.8243	69.7056	87.6923	11.1146	143.173	53.7736	6.1698	35.8256				51.8182	10.3181	32.109	71.25	52.3266	47.36	53.7736	33.4554	9.0807
58				45.6693	9.3741	67.3451	63.7363	42.7425	43.4026	80.5556	25.8926	114.765	82.8571	26.0427	105.073	87.8788	11.959	46.9185	80.5556	61.0643	88.6862	90.625	12.2496	67.149	89.2308	10.4926	150.113	54.717	6.0424	36.3396				52.7273	12.0918	31.7538	72.5	68.6538	47.7872	54.717	40.5276	9.5948
59				46.4567	7.9776	72.9392	64.8352	50.3565	41.2124	81.9444	20.0553	126.168	84.2857	23.508	114.452	89.3939	14.5909	44.1083	81.9444	46.7497	105.526	92.1875	11.7568	63.7572	90.7692	10.7378	154.916	55.6604	7.1779	35.905				53.6364	14.6753	32.6199	73.75	89.7878	44.1818	55.6604	43.8791	8.9781
60				47.2441	7.6696	78.6268	65.9341	65.8637	38.9749	83.3333	18.2014	135.91	85.7143	22.1939	116.551	90.9091	20.3566	39.7358	83.3333	41.1481	126.519	93.75	10.6593	58.9874	92.3077	10.4519	159.574	56.6038	7.3702	35.0684				54.5455	15.8794	35.0917	75	101.431	46.3819	56.6038	49.5758	8.7585
61				48.0315	7.7159	84.6025	67.033	76.6759	36.733	84.7222	15.6484	139.061	87.1429	20.4382	116.948	92.4242	21.9579	36.4904	84.7222	39.3843	141.287	95.3125	9.5032	57.8784	93.8462	11.646	166.512	57.5472	8.8775	35.9373				55.4545	18.7505	34.0774	76.25	86.2858	55.723	57.5472	66.5302	8.7506
62				48.8189	7.0025	83.1168	68.1319	79.9742	34.5174	86.1111	14.2787	140.931	88.5714	20.239	118.942	93.9394	18.4628	36.1117	86.1111	33.6934	160.925	96.875	9.2394	61.6021	95.3846	11.3092	173.502	58.4906	8.8654	35.0981				56.3636	23.511	35.4919	77.5	61.4698	70.5344	58.4906	77.3566	8.8947
63				49.6063	8	84	69.2308	76.3403	34.0115	87.5	13.3125	140.836	90	18.68	119.17	95.4545	13.754	35.701	87.5	30.75	160.25	98.4375	10.7081	64.5737	96.9231	10.7636	176.702	59.434	9	35.8714				57.2727	34.56	38.588	78.75	39.0116	87.6828	59.434	83.8027	8.0676
64				50.3937	8	78.9532	70.3297	70.8926	32.1573	88.8889	12.3549	142.287	91.4286	16.1804	120.396	96.9697	10.1693	33.7882	88.8889	30.5638	156.56	100	10.1501	66.6688	98.4615	11.1579	180.246	60.3774	9	38.108				58.1818	50.111	41.176	80	28.7111	108.756	60.3774	76.1844	8.5454
65				51.1811	9.4507	73.2966	71.4286	69.6576	30.025	90.2778	10.7787	149.473	92.8571	14.2602	122.837	98.4848	8.9082	34.3914	90.2778	28.5833	146.496				100	10.7423	178.847	61.3208	10.067	39.2349				59.0909	70.0171	44.8592	81.25	25.3385	124.97	61.3208	68.835	7.9557
66				51.9685	11.1658	65.5863	72.5275	70.8989	30.7886	91.6667	9.5417	160.875	94.2857	14.3429	127.644	100	7.5891	35.1486	91.6667	26.8472	138.023							62.2642	11.1121	42.0598				60	76.7729	48.3037	82.5	21.7823	146.776	62.2642	62.6189	7.5815
67				52.7559	13.4387	61.6524	73.6264	68.2806	30.1729	93.0556	9.0558	171.153	95.7143	13.9027	135.786				93.0556	23.8101	133.695							63.2075	11.9127	42.405				60.9091	69.824	50.0949	83.75	18.9777	168.548	63.2075	55.9136	8
68				53.5433	16.5798	59.1989	74.7253	68.7915	29.2058	94.4444	8.6944	178.862	97.1429	13.3788	145.3				94.4444	21.8416	132.418							64.1509	13.0987	43.6016				61.8182	55.2008	49.8452	85	16.2917	184.508	64.1509	55.4058	7.9536
69				54.3307	20.2824	57.4088	75.8242	65.3304	28.617	95.8333	7.7708	177.287	98.5714	12.8106	148.425				95.8333	20.3762	133.773							65.0943	16.4075	44.034				62.7273	52.9181	47.4038	86.25	15.9915	198.65	65.0943	55.6023	7.5629
70				55.1181	24.0186	56.9936	76.9231	60.3449	28.635	97.2222	6.8472	163.719	100	12.5	144.5				97.2222	19.09	141.485							66.0377	18.5946	44.1504				63.6364	61.2027	44.1786	87.5	14.4167	197.054	66.0377	56.9368	7.4452
71				55.9055	34.144	52.1877	78.022	53.1275	28.1	98.6111	6	140.058							98.6111	17.412	142.971							66.9811	24.5368	43.2554				64.5455	78.5654	39.1929	88.75	13.2216	192.095	66.9811	50.993	8.099
72				56.6929	48.4011	50.1956	79.1209	53.6708	28.6681	100	6	111							100	16	135							67.9245	34.0744	42.5116				65.4545	92.5663	34.9183	90	12.1667	192.783	67.9245	47.5173	9.0679
73				57.4803	52.6568	49.9348	80.2198	45.1658	29.0913																			68.8679	44.1533	40.7138				66.3636	93.5296	31.0808	91.25	10.9012	198.923	68.8679	50.7432	9.7998
74				58.2677	45.3756	47.5799	81.3187	39.089	29																			69.8113	59.4039	37.5094				67.2727	81.2846	28.751	92.5	10	206.163	69.8113	55.3509	10.5034
75				59.0551	34.363	45.8479	82.4176	37.0405	30.0022																			70.7547	87.8943	35.4623				68.1818	58.4106	27.6537	93.75	9.4792	216.246	70.7547	79.5511	10.3699
76				59.8425	26.0821	42.7344	83.5165	35.3903	31.5394																			71.6981	101.098	31.2187				69.0909	42.2141	26.2416	95	8.1764	216.578	71.6981	119.269	12.0955
77				60.6299	25.4019	42.7794	84.6154	32.59	32.3846																			72.6415	90.7669	27.496				70	37.0806	25.0393	96.25	7.7013	201.94	72.6415	153.152	12.9885
78				61.4173	23.96	37.8392	85.7143	30.2581	33.2371																			73.5849	78.0705	24.8113				70.9091	35.2298	23.9449	97.5	7.567	180.705	73.5849	156.791	13.018
79				62.2047	27.6442	35.9259	86.8132	27.1043	34.2465																			74.5283	58.4765	22.7814				71.8182	32.676	23.009	98.75	6.2292	158.746	74.5283	130.642	13.911
80				62.9921	29.2846	34.2143	87.9121	24.5932	36.2409																			75.4717	41.5841	21.3648				72.7273	29.6148	23.8162	100	6.3333	144.333	75.4717	88.1471	13.1936
81				63.7795	34.6776	33.0168	89.011	23.7089	38.6655																			76.4151	35.713	21				73.6364	29.0993	25.4631				76.4151	55.5117	14.9716
82				64.5669	41.0085	30.5742	90.1099	21.8211	40.1944																			77.3585	35.1222	21.5763				74.5455	28.6386	27.5111				77.3585	41.3265	14.9401
83				65.3543	50.9634	28.734	91.2088	20.0295	42.4372																			78.3019	37.8029	22.014				75.4545	27.7469	30.7192				78.3019	35.2001	14.9094
84				66.1417	60.8028	30.4014	92.3077	18.7103	44.9874																			79.2453	46.591	24.9498				76.3636	25.99	35.7659				79.2453	27.8716	14.1025
85				66.9291	58.3079	29.4168	93.4066	16.6026	44.6158																			80.1887	58.7127	27.6241				77.2727	23.4973	41.0095				80.1887	23.4968	15.2516
86				67.7165	49.2206	28.0274	94.5055	14.8309	45.545																			81.1321	66.0259	31.9615				78.1818	20.7764	48.4593				81.1321	21.627	16.2463
87				68.5039	34.7346	28.3058	95.6044	16.0857	43.3952																			82.0755	60.2176	37.1625				79.0909	16.7798	56.7649				82.0755	17.3956	18.7467
88				69.2913	24.0334	29.9348	96.7033	14.6945	43.1527																			83.0189	45.323	41.4065				80	13.2851	63.9467				83.0189	13.4734	18.7599
89				70.0787	18.9849	31.5556	97.8022	13.0649	44.0324																			83.9623	33.4626	44.4164				80.9091	11.3179	70.4562				83.9623	10.942	19.3296
90				70.8661	15.157	35.3542	98.9011	14.2457	44.6974																			84.9057	26.0972	47.3905				81.8182	9.6095	77.7114				84.9057	10.2717	19.3312
91				71.6535	13.5843	37.4644	100	15.1041	47.4282																			85.8491	21.2062	49.5102				82.7273	8.6273	82.2458				85.8491	9.0922	19.9493
92				72.4409	12.2123	40.8675																						86.7925	17.3359	50.833				83.6364	7.8476	86.2223				86.7925	8.01	19.582
93				73.2283	11.2499	48.0709																						87.7358	15.6808	53.1001				84.5455	7.2535	88.6934				87.7358	8.0437	20.9166
94				74.0157	10.1013	54.4012																						88.6792	14.3045	54.1374				85.4545	6.7428	90.5992				88.6792	7.9688	19.4818
95				74.8031	10.1481	64.4536																						89.6226	11.219	51.8344				86.3636	6.3019	92.6423				89.6226	7.8484	19.5225
96				75.5906	11.6723	71.9814																						90.566	10.7277	51.9409				87.2727	6.0709	92.5198				90.566	7.2431	21.5906
97				76.378	9.4407	84.0284																						91.5094	8.5556	53.4078				88.1818	4.2717	91.4863				91.5094	7.3513	21.7482
98				77.1654	8.9844	93.0143																						92.4528	8	53.327				89.0909	4.1095	88.7375				92.4528	7.0565	23.03
99				77.9528	7.7175	94.1451																						93.3962	7.5283	53.5355				90	4.1371	81.8678				93.3962	7.6236	23.2735
100				78.7402	7.7366	95.045																						94.3396	6.1195	52.9273				90.9091	3.7501	79.2244				94.3396	6.6618	23.0786
101				79.5276	7.0212	98.132																						95.283	5.5723	50.305				91.8182	3	78.2186				95.283	5.674	24.0433
102				80.315	6.5872	100.218																						96.2264	5.9338	48.0093				92.7273	3	80.413				96.2264	4.4322	24.6308
103				81.1024	6.3441	99.8688																						97.1698	5.1602	45.9838				93.6364	3	87.9288				97.1698	5.2011	24.7057
104				81.8898	5.9287	98.4344																						98.1132	5.3899	43.9509				94.5455	3	95.2576				98.1132	5.8903	24.7807
105				82.6772	6	92.9472																						99.0566	5.9746	41.4711				95.4545	2.6315	96.1082				99.0566	6.0672	24.7162
106				83.4646	5.6565	93.066																						100	5.3333	38.4444				96.3636	0	96.4069				100	7.6778	23.0718
107				84.252	5.0225	92.8876																												97.2727	0	93.9074
108				85.0394	4.5557	89.0179																												98.1818	0	86.282
109				85.8268	4.5048	85.5264																												99.0909	0	78.2936
110				86.6142	4.8161	81.9885																												100	0	74.5622
111				87.4016	4.6141	77.7859
112				88.189	4.3379	78.1039
113				88.9764	4.882	78.2393
114				89.7638	4.706	79.8067
115				90.5512	4	84.5299
116				91.3386	4.0714	86.8515
117				92.126	4.245	90.4623
118				92.9134	4.9499	89.758
119				93.7008	4	92.8563
120				94.4882	4	91.6044
121				95.2756	4.91	91.4804
122				96.063	4.702	91.1185
123				96.8504	4.876	87.686
124				97.6378	5	83.3567
125				98.4252	4.8105	79.3702
126				99.2126	4.8094	76.001
127				100	4.3817	71.3658
128
129
130
131
132
133
134
135
136
137
138
139
140
141
142
143
144
145
146
147
148
149
150
151
152

## Sheet: Binned
% Chr Length		2	FISH	IF	4	FISH	IF	8	FISH	IF	9	FISH	IF	12	FISH	IF	13	FISH	IF	14	FISH	IF	15	FISH	IF	16	FISH	IF	17	FISH	IF	19	FISH	IF	20	FISH	IF	22	FISH	IF	23	FISH	IF
		X	Y	Y	X	Y	Y	X	Y	Y	X	Y	Y	X	Y	Y	X	Y	Y	X	Y	Y	X	Y	Y	X	Y	Y	X	Y	Y	X	Y	Y	X	Y	Y	X	Y	Y	X	Y	Y
0-5		0	4	10	0	3	21	0	13	22	0	3	32	0	10.5	21	0	6	53	0	11.3333	69.6667	0	8	34	0	15	121	0	3	9	0	9	30	0	4	18	0	5.4444	46.2222	0	5	20
		1.78571	3.0077	12.1237	0.787402	4.1364	22.1349	1.0989	9.9436	21.9998	1.38889	2.4917	37.1555	1.42857	10.1463	21.7071	1.51515	5.2137	50.245	1.38889	9.3763	62.4302	1.5625	7.0668	40.8906	1.53846	16.8143	118.802	0.943396	3.4918	9.7704	1.85185	9.0436	36.6691	0.909091	4.9348	17.0652	1.25	5.0881	49.5095	0.943396	4.2216	19.5141
		3.57143	3	12.2857	1.5748	4.7001	22.291	2.1978	13.7354	22.2485	2.77778	3	44.75	2.85714	8.4141	21.8286	3.0303	5.2356	48.4513	2.77778	10.1193	52.1492	3.125	7.7338	48.6477	3.07692	19.9592	114.104	1.88679	3.6088	10.1271	3.7037	9.6092	45.4315	1.81818	4.1297	18.9925	2.5	4.9885	55.974	1.88679	4.72	21.4002
					2.3622	4.018	22.982	3.2967	13.4397	23.9905	4.16667	3	55.0829	4.28571	8.4308	21.4237	4.54545	5.8535	47.9364	4.16667	9.0833	45.9572	4.6875	7.8947	60.063	4.61538	19.4923	106.774	2.83019	3.6302	10.2849	5.55556	9.9722	55.6864	2.72727	4.1901	19.1889	3.75	4.9792	59.5581	2.83019	5.315	20.9449
					3.14961	4	25.1581	4.3956	10.5205	24.9922																			3.77358	3.0365	10.9635				3.63636	4.994	20.2454				3.77358	5.346	21.7338
					3.93701	4.9468	26.3678																						4.71698	3.1918	11.1635				4.54545	4.6864	23.963				4.71698	6.0739	21.2549
					4.72441	4.0638	28.0389																																							Mean	STDDEV	SEM
Average			3.3359	11.4698		4.12359	23.9961		12.1278	23.0462		2.87292	42.2471		9.3728	21.4898		5.5757	49.9082		9.97805	57.5508		7.67382	45.9003		17.8164	115.17		3.32652	10.2182		9.40625	41.9468		4.48917	19.5758		5.12505	52.816		5.11275	20.808		FISH	7.16691	4.06448	1.08628
																																													IF	38.2959	26.1815	6.99729
5-10		5.35714	3.9732	14.375	5.51181	4	30.7622	5.49451	12.0503	25.6177	5.55556	3	73.2948	5.71429	7.8286	20.6571	6.06061	5.6656	47.4299	5.55556	9.5741	46.4527	6.25	7.5263	70.2888	6.15385	19.4058	100.614	5.66038	3.9359	11.9359	7.40741	9.152	72.6908	5.45455	4.6198	26.9638	5	4.7764	64.9056	5.66038	5.7701	21.2149
		7.14286	3.0357	16.3622	6.29921	4.15	34.4955	6.59341	11.9986	26.7369	6.94444	3	94.1595	7.14286	7.3827	22.5714	7.57576	6.8693	46.6508	6.94444	8.1714	47.2217	7.8125	7.8269	79.7816	7.69231	19.3895	90.0324	6.60377	4.2597	11.5067	9.25926	8.822	86.9229	6.36364	5.4311	29.8465	6.25	4.918	73.5664	6.60377	5.0074	21.3661
		8.92857	3	20.2436	7.08661	4.0296	39.1469	7.69231	10.5829	28.971	8.33333	3	110.287	8.57143	6.8161	24.4267	9.09091	8.2254	48.9404	8.33333	8.0185	52.0185	9.375	8.7875	91.4944	9.23077	19.0323	82.4851	7.54717	4.747	12.0175				7.27273	4.523	36.4161	7.5	5	86.9056	7.54717	5.0266	22.5342
					7.87402	4	44.8649	8.79121	11.9747	31.9513	9.72222	3.1676	125.786							9.72222	9.7119	58.3555							8.49057	4.0168	12.6961				8.18182	4.5703	42.1804	8.75	4.7506	106.207	8.49057	5	21.4123
					8.66142	4.5302	53.1942	9.89011	11.4506	30.899																			9.43396	4.1134	14.4088				9.09091	4.9926	51.3537				9.43396	5.4339	21.7764
					9.44882	4.0952	59.2825																																							Mean	STDDEV	SEM
Average			3.3363	16.9936		4.13417	43.6244		11.6114	28.8352		3.0419	100.882		7.34247	22.5517		6.9201	47.6737		8.86897	51.0121		8.0469	80.5216		19.2759	91.0439		4.21456	12.513		8.987	79.8068		4.82736	37.3521		4.86125	82.8961		5.2476	21.6608		FISH	7.19399	4.11897	1.10084
																																													IF	51.2405	29.1062	7.77896
10-15		10.7143	3.8112	24.6352	10.2362	3.9064	61.3338	10.989	13.6966	33.9368	11.1111	3.9506	134.161	10	6.04	27.74	10.6061	9.6837	52.081	11.1111	8.107	63.5638	10.9375	7.5776	92.3447	10.7692	16.2067	79.412	10.3774	4.4748	15.9822	11.1111	9.0669	98.2113	10	5	60.8854	10	4.9167	124.9	10.3774	5.2806	21.6239
		12.5	4	29.6875	11.0236	3.1804	65.463	12.0879	12.3525	35.9572	12.5	3.2383	144.09	11.4286	6.1571	36.311	12.1212	10.3647	56.0429	12.5	8.8438	67.2917	12.5	8.8599	93.0798	12.3077	15.8077	78.8771	11.3208	4.9167	19.0566	12.963	10.1944	103.852	10.9091	5	71.5077	11.25	4.8895	140.562	11.3208	4.8095	21.6301
		14.2857	3.0612	32.7857	11.811	3.1824	62.7469	13.1868	11.7603	39.9065	13.8889	3.2351	155.452	12.8571	6.8441	46.9251	13.6364	9.3188	57.386	13.8889	8.0098	68.8374	14.0625	7.8078	94.772	13.8462	15.007	80.7715	12.2642	4.4009	23.5519	14.8148	10.7142	103.036	11.8182	5	75.3759	12.5	5	153.875	12.2642	4.9433	21.8891
					12.5984	3.6135	63.253	14.2857	12.9699	42.7398				14.2857	5.9337	57.0714													13.2075	4.5498	29.0935				12.7273	4.8903	75.9905	13.75	4.4792	162.56	13.2075	6.3936	22.144
					13.3858	3.483	60.6172																						14.1509	4.4245	34.5283				13.6364	4.0287	79.6873				14.1509	5.7248	20.4391
					14.1732	3.927	60.4756																												14.5455	3.9866	71.3166
					14.9606	3.3902	59.228																																							Mean	STDDEV	SEM
Average			3.62413	29.0361		3.52613	61.8739		12.6948	38.1351		3.47467	144.568		6.24372	42.0119		9.78907	55.17		8.3202	66.5643		8.08177	93.3988		15.6738	79.6869		4.55334	24.4425		9.99183	101.7		4.65093	72.4606		4.82135	145.474		5.43036	21.5452		FISH	7.20544	3.60453	0.963351
																																													IF	69.719	38.8272	10.377
15-20		16.0714	3.9196	34.9707	15.748	3.8064	59.0518	15.3846	11.1778	46.7642	15.2778	3.8984	158.739	15.7143	6	64.6206	15.1515	7.8218	59.2722	15.2778	8.2778	68.3301	15.625	7.6537	97.1984	15.3846	15	78.8279	15.0943	3.8561	38.7547	16.6667	11.0584	104.327	15.4545	3.1061	63.6514	15	4.2514	168.343	15.0943	6.1067	20.1062
		17.8571	3.4796	32.7628	16.5354	4	59.2339	16.4835	12.8186	48.9397	16.6667	4.0139	168.549	17.1429	6	71.4498	16.6667	7.0715	56.286	16.6667	8.6667	74.0741	17.1875	8.277	99.9469	16.9231	12.8538	79.016	16.0377	4	40.5238	18.5185	11.4954	105.532	16.3636	3.0051	59.0191	16.25	5	170.813	16.0377	6.3177	19.9161
		19.6429	3.9579	30.4962	17.3228	4	62.5594	17.5824	11.0641	49.9688	18.0556	4.2294	170.936	18.5714	6.9429	76.9539	18.1818	6.1503	55.7675	18.0556	7.9906	79.8434	18.75	8.0036	103	18.4615	12.1876	76.2906	16.9811	4.4258	39.6251				17.2727	3.1961	54.2183	17.5	5	176.23	16.9811	5.4002	20.1224
					18.1102	4	67.9332	18.6813	12.8734	46.9785	19.4444	3.9342	168.756				19.697	5.2468	51.4677	19.4444	8.1055	86.5514							17.9245	4.3507	40.0823				18.1818	3.0107	51.457	18.75	5.9957	169.026	17.9245	5.2298	19.5372
					18.8976	4.3662	71.2259	19.7802	12.8772	44.943																			18.8679	4.4536	41.68				19.0909	3	50.0621				18.8679	6.315	19.2186
					19.685	4.1695	74.8799																						19.8113	4.1065	42.9528										19.8113	5.9807	19.8103			Mean	STDDEV	SEM
Average			3.7857	32.7432		4.05702	65.814		12.1622	47.5188		4.01898	166.745		6.3143	71.0081		6.5726	55.6983		8.26015	77.1997		7.9781	100.048		13.3471	78.0448		4.19878	40.6031		11.2769	104.93		3.0636	55.6816		5.06177	171.103		5.89168	19.7851		FISH	6.85635	3.21094	0.858159
																																													IF	77.6373	43.6803	11.6741
20-25		21.4286	4.6378	28.5816	20.4724	4.5663	75.5645	20.8791	11.7805	46.0275	20.8333	4.2292	158.731	20	6.18	81.75	21.2121	5.9945	48.6951	20.8333	8.4734	91.8414	20.3125	8.7499	102.96	20	12.682	71.4502	20.7547	4	43.818	20.3704	11.5346	105.127	20	3	47.8939	20	6.3556	162.911	20.7547	5.3731	20.7982
		23.2143	4.9834	27.588	21.2598	4.9283	72.2009	21.978	10.7913	43.8307	22.2222	4.4414	142.46	21.4286	6.9133	88.7857	22.7273	5.5753	48.6922	22.2222	9.0412	94.4691	21.875	9.8419	103.972	21.5385	11.5921	71.6223	21.6981	4.4914	44.3042	22.2222	12.7029	106.599	20.9091	3.5175	47.3972	21.25	6	161.061	21.6981	5.3389	21.3223
					22.0472	4.8743	69.5519	23.0769	11.659	41.4073	23.6111	4	126.283	22.8571	6.4416	96.8857	24.2424	5.8083	50.7889	23.6111	9.4289	94.1283	23.4375	9.4772	104.483	23.0769	11.3348	70.3984	22.6415	4.346	45.0061	24.0741	14.4834	106.715	21.8182	3.0231	47.0666	22.5	5.5417	158.374	22.6415	5.5	21.9993
					22.8346	5.2528	64.6999	24.1758	12.3404	39.1016				24.2857	6.7763	104.341										24.6154	11.6467	73.138	23.5849	4.2503	44.6535				22.7273	3	45.5039	23.75	5.0194	152.694	23.5849	5.3553	21.3563
					23.622	4.8379	60.8412																						24.5283	4.9686	47.2203				23.6364	3	48.1958				24.5283	5.497	20.9705
					24.4094	4.8317	58.9741																												24.5455	3	48.688									Mean	STDDEV	SEM
Average			4.8106	28.0848		4.88188	66.9721		11.6428	42.5918		4.22353	142.492		6.5778	92.9405		5.7927	49.3921		8.98117	93.4796		9.35633	103.805		11.8139	71.6522		4.41126	45.0004		12.907	106.147		3.0901	47.4576		5.72917	158.76		5.41286	21.2893		FISH	7.11651	3.0898	0.825784
																																													IF	76.4331	40.1172	10.7218
25-30		25	5	26.125	25.1969	5.4325	57.8271	25.2747	14.3451	39.9552	25	4.3281	113.891	25.7143	8.4571	109.286	25.7576	5.6856	53.1923	25	11.125	93.625	25	9.1476	96.1048	26.1538	11.0971	70.7033	25.4717	4.1514	48	25.9259	14.8902	104.97	25.4545	3	50.8748	25	4.7083	149.458	25.4717	6.8616	21.1263
		26.7857	5	27.0944	25.9843	5.8013	56.7356	26.3736	14.4859	39.0467	26.3889	4.0368	108.47	27.1429	8.6131	108.758	27.2727	6	54.4232	26.3889	11.2079	88.6713	26.5625	10.3742	87.128	27.6923	10.5032	72.4687	26.4151	4	50.0013	27.7778	15.4796	102.213	26.3636	3	47.0801	26.25	4.7167	145.738	26.4151	6	21.7785
		28.5714	5.8571	26.2041	26.7717	5.9808	56.8318	27.4725	15.8283	38.1618	27.7778	4.9722	107.262	28.5714	8.6939	102.194	28.7879	6	53.6842	27.7778	12.0412	84.463	28.125	11.7739	81.3575	29.2308	11.3561	73.5858	27.3585	4	51.1533	29.6296	16.0002	94.2946	27.2727	2.1534	43.3283	27.5	5.4309	138.573	27.3585	6.2468	20.1182
					27.5591	6.5671	57.1121	28.5714	16.219	38.2437	29.1667	4.5707	103.609							29.1667	11.9456	80.9491	29.6875	12.0307	76.3943				28.3019	4.0961	50.9074				28.1818	3.8442	41.0933	28.75	5.2701	133.279	28.3019	8.1833	20.7699
					28.3465	7.5248	58.5263	29.6703	21.4546	38.0194																			29.2453	4.1862	49.3245				29.0909	3.0625	39.1857				29.2453	10.0357	19.7655
					29.1339	8.3121	60.3556
					29.9213	9.3293	62.5502																																							Mean	STDDEV	SEM
Average			5.2857	26.4745		6.99256	58.5627		16.4666	38.6854		4.47695	108.308		8.58803	106.746		5.8952	53.7666		11.5799	86.9271		10.8316	85.2462		10.9855	72.2526		4.08674	49.8773		15.4567	100.493		3.01202	44.3124		5.0315	141.762		7.46548	20.7117		FISH	8.29674	4.05903	1.08482
																																													IF	71.0089	33.986	9.08314
30-35		30.3571	6.3635	25.2296	30.7087	10.5287	63.9097	30.7692	26.9404	38	30.5556	4.163	101.263	30	9.21	95.72	30.303	6.0975	55.8416	30.5556	11.1703	77.1034	31.25	13.004	72.9451	30.7692	11.7449	73.55	30.1887	4.6541	49.1108	31.4815	16.8606	88.7884	30	3	39.8608	30	6.8056	123.856	30.1887	8.4207	18.3964
		32.1429	6.9311	25.2168	31.4961	11.1155	64.5353	31.8681	32.3804	38.9435	31.9444	5.0278	99.324	31.4286	10.3104	90.1649	31.8182	6.0132	57.0379	31.9444	12.5649	76.9356	32.8125	17.0056	68.052	32.3077	11.6129	74.9843	31.1321	4.5655	46.1229	33.3333	20.3286	86.2636	30.9091	3.1438	40.421	31.25	6.4839	102.549	31.1321	9.8064	19.6344
		33.9286	7.8304	25.213	32.2835	11.7061	68.3559	32.967	36.2601	42.1606	33.3333	5.6667	96.1111	32.8571	10.8641	85.4212	33.3333	6.5921	60.3132	33.3333	12.8148	76.7778	34.375	22.122	60.5637	33.8462	13.4485	77.2845	32.0755	4.5671	44.0209				31.8182	3.0153	41.5829	32.5	6.3677	90.2948	32.0755	8.376	18.7348
					33.0709	9.8718	70.1396	34.0659	34.0067	41.163	34.7222	5.4185	94.7991	34.2857	12.4596	84.3992	34.8485	7.2594	57.2526	34.7222	15.7874	78.3597							33.0189	4.0346	43.0856				32.7273	3	45.0324	33.75	8.2546	82.1408	33.0189	7.2668	18.3425
					33.8583	9.1969	69.5119																						33.9623	4	43.4995				33.6364	3.6068	48.4403				33.9623	7.0423	18.5997
					34.6457	8.3308	68.6692																						34.9057	4.1926	44.2312				34.5455	3.0452	51.9633				34.9057	7.333	18.0762			Mean	STDDEV	SEM
Average			7.04167	25.2198		10.125	67.5203		32.3969	40.0668		5.069	97.8744		10.711	88.9263		6.49055	57.6113		13.0843	77.2941		13.0329	50.3902		9.20157	56.4547		4.33565	45.0118		18.5946	87.526		3.13518	44.5501		6.97795	99.7102		8.04087	18.6307		FISH	10.5884	7.21148	1.92735
																																													IF	61.199	25.1193	6.7134
35-40		35.7143	8.8214	24.3214	35.4331	7.7078	69.5804	35.1648	27.4318	39.1322	36.1111	5.7232	87.8821	35.7143	13.2653	88.5714	36.3636	7.2564	54.5536	36.1111	20.3601	79.036	35.9375	24.4462	53.3847	35.3846	16.6072	87.2532	35.8491	4.2054	44.9453	35.1852	21.0711	82.0077	35.4545	3	52.3606	35	8.6333	83.5736	35.8491	7.1222	18.4607
		37.5	9.8125	21.5625	36.2205	7	70.114	36.2637	23.6061	39.524	37.5	5.918	82.168	37.1429	13.0439	92.6227	37.8788	8.6207	51.3682	37.5	29.6771	83.1146	37.5	29.29	51.1789	36.9231	21.2831	95.2648	36.7925	4.0989	46.0045	37.037	21.9818	80.5753	36.3636	3	49.4224	36.25	10.1776	88.1333	36.7925	7.9337	17.4681
		39.2857	11.0332	20.7143	37.0079	6.9763	70.7412	37.3626	16.7969	39.9318	38.8889	6.1944	77.3086	38.5714	12.3084	94.6884	39.3939	9.1478	49.7318	38.8889	40.3477	83.0103	39.0625	51.7616	50.7974	38.4615	26.702	104.324	37.7358	4	43.9277	38.8889	22.7839	76.2765	37.2727	3.3689	46.6389	37.5	11.7083	90.5573	37.7358	7.4326	17.0473
					37.7953	7.3083	70.6464	38.4615	16.623	39.2319																			38.6792	4.5881	41.4475				38.1818	3.9442	41.4765	38.75	11.8298	97.1874	38.6792	6.9435	17.4776
					38.5827	7.1489	67.5743	39.5604	15.4015	39.817																			39.6226	4.6415	37.8491				39.0909	4	36.0215				39.6226	6.6187	17.6187
					39.3701	7	65.5131																																							Mean	STDDEV	SEM
Average			9.88903	22.1994		7.19022	69.0282		19.9719	39.5274		5.9452	82.4529		12.8725	91.9608		8.34163	51.8845		30.1283	81.7203		35.1659	51.787		21.5308	95.6139		4.30678	42.8348		21.9456	79.6198		3.46262	45.184		10.5872	89.8629		7.21014	17.6145		FISH	14.182	9.58924	2.56283
																																													IF	61.5207	25.1902	6.73236
40-45		41.0714	11.912	19.861	40.1575	7.4559	62.844	40.6593	15.4118	38.1568	40.2778	6.697	75.3143	40	12.18	93.16	40.9091	11.8718	48.3082	40.2778	60.7497	77.089	40.625	80.0783	53.0211	40	32.9343	103.878	40.566	4	35.2166	40.7407	25.0819	76.2344	40	4	32.496	40	14.2	98.4	40.566	7.0717	18
		42.8571	13.9082	20.3571	40.9449	7.2258	60.3231	41.7582	14.2173	37.3452	41.6667	7	79.6337	41.4286	11.3661	87.5804	42.4242	13.6031	45.9899	41.6667	115.046	74.9259	42.1875	98.2737	56.0324	41.5385	39.4258	103.276	41.5094	4.0881	35.6492	42.5926	29.3647	75.2054	40.9091	4.9096	30.6984	41.25	16.0815	99.971	41.5094	7.6754	18
		44.6429	15.3482	21.6492	41.7323	7.7861	60.6971	42.8571	14.4558	36.226	43.0556	7.4273	83.0449	42.8571	10.8316	80.4949	43.9394	15.5701	44.5272	43.0556	159.138	75.4154	43.75	95.8439	59.5233	43.0769	47.3982	96.0751	42.4528	4.9097	35.0337	44.4444	33.6722	75.3506	41.8182	4.1698	27.4235	42.5	16.1986	102.364	42.4528	7.9961	17.8827
					42.5197	9.7169	58.994	43.956	13.9955	35.9798	44.4444	8.0401	88.4938	44.2857	10.25	75.9484				44.4444	172.222	82.4938				44.6154	55.1394	89.2208	43.3962	5	34.5162				42.7273	4.9274	27.8878	43.75	16.2669	107.206	43.3962	7.7499	16.9164
					43.3071	10.0628	57.2594																						44.3396	4.7925	34.788				43.6364	5	28.9075				44.3396	8.0285	16.1013
					44.0945	11.501	60.5473																												44.5455	5	27.386
					44.8819	9.9331	63.7094																																							Mean	STDDEV	SEM
Average			13.7228	20.6224		9.09737	60.6249		14.5201	36.9269		7.2911	81.6217		11.1569	84.2959		13.6817	46.2751		126.789	77.481		91.3986	56.1923		43.7244	98.1125		4.55806	35.0407		29.3729	75.5968		4.6678	29.1332		15.6867	101.985		7.70432	17.3801		FISH	28.098	35.199	9.40732
																																													IF	58.6635	27.354	7.31065
45-50		46.4286	16.9209	21.4515	45.6693	9.3741	67.3451	45.0549	14.074	35.7616	45.8333	9.1875	91.464	45.7143	11.4853	76.3237	45.4545	16.5346	41.6967	45.8333	135.05	90.7211	45.3125	76.312	60.3053	46.1538	56.6998	82.3519	45.283	4.6604	32.7601	46.2963	39.5463	76.7427	45.4545	5.7482	29.7324	45	18.5708	105.736	45.283	8.2082	15
		48.2143	20.1786	22.6607	46.4567	7.9776	72.9392	46.1538	13.5468	35.1925	47.2222	10.4111	95.7502	47.1429	11.7284	76	46.9697	18.6092	39.9805	47.2222	75.1337	94.2994	46.875	54.5845	60.1523	47.6923	53.1642	71.978	46.2264	5.5412	32.0695	48.1481	52.2584	76.8217	46.3636	6.6659	29.5182	46.25	21.4017	107.469	46.2264	8.3996	14.6566
					47.2441	7.6696	78.6268	47.2527	14.5327	34.8457	48.6111	11.6042	99.3687	48.5714	12.1678	76	48.4848	22.652	38.0101	48.6111	39.3108	96.9065	48.4375	51.996	61.4096	49.2308	49.6772	64.8121	47.1698	5.5611	30.956				47.2727	6.0737	30.8526	47.5	22.6333	111.3	47.1698	10.6262	11.9848
					48.0315	7.7159	84.6025	48.3516	14.9929	35.0012																			48.1132	6.4269	29.9034				48.1818	7.5338	31.3202	48.75	23.7375	120.047	48.1132	14.6711	11.6998
					48.8189	7.0025	83.1168	49.4505	15.5278	36.7967																			49.0566	7.1321	30.6223				49.0909	7.983	31.9372				49.0566	15.1772	10.0452
					49.6063	8	84																																							Mean	STDDEV	SEM
Average			18.5497	22.0561		7.95662	78.4384		14.5348	35.5195		10.4009	95.5276		11.7938	76.1079		19.2653	39.8958		83.1648	93.9757		60.9642	60.6224		53.1804	73.0473		5.86434	31.2623		45.9023	76.7822		6.80092	30.6721		21.5858	111.138		11.4165	12.6773		FISH	26.5272	23.346	6.23949
																																													IF	59.8373	29.8228	7.97049
50-55		50	24.75	23.75	50.3937	8	78.9532	50.5495	14.2785	37.7433	50	11.5	102.375	50	15	75.75	50	27.0525	35.1345	50	29.8333	98	50	56.6708	59.6394	50.7692	44.8282	62.239	50	7	30.0278	50	79.6392	74.9625	50	9.3475	31.542	50	25.3889	131.25	50	16.5929	9.8699
		51.7857	28.9962	24.6352	51.1811	9.4507	73.2966	51.6484	12.4654	39.0659	51.3889	12.0576	105.713	51.4286	16.4767	79.6412	51.5152	27.8894	40.1426	51.3889	30.965	100.785	51.5625	59.889	55.9247	52.3077	43.7893	61.9574	50.9434	6.8679	32.053	51.8519	131.488	74.3722	50.9091	9.8524	31.1476	51.25	26.7966	137.714	50.9434	21.1628	9.0148
		53.5714	35.8291	25.2372	51.9685	11.1658	65.5863	52.7473	14.3018	40.4272	52.7778	13.0556	108.128	52.8571	20.3427	83.542	53.0303	25.1102	41.7013	52.7778	27.4959	96.9892	53.125	59.6844	54.0546	53.8462	46.3572	61.4481	51.8868	7.1101	33.6632	53.7037	192.418	76.0421	51.8182	10.3181	32.109	52.5	28.725	144.167	51.8868	22.7498	9
					52.7559	13.4387	61.6524	53.8462	15.2478	41.863	54.1667	14.898	111.329	54.2857	22.7263	86.5398	54.5455	21.3936	41.4108	54.1667	26.9317	92.9873	54.6875	62.5518	53.7743				52.8302	7.4955	35.425				52.7273	12.0918	31.7538	53.75	31.6277	140.941	52.8302	27.7087	9
					53.5433	16.5798	59.1989	54.9451	14.6212	44.1099																			53.7736	6.1698	35.8256				53.6364	14.6753	32.6199				53.7736	33.4554	9.0807
					54.3307	20.2824	57.4088																						54.717	6.0424	36.3396				54.5455	15.8794	35.0917				54.717	40.5276	9.5948			Mean	STDDEV	SEM
Average			29.8584	24.5408		13.1529	66.016		14.1829	40.6419		12.8778	106.886		18.6364	81.3683		25.3614	39.5973		28.8065	97.1903		59.699	55.8482		33.7437	46.4111		6.78095	33.889		100.886	56.3442		12.0274	32.3773		28.1346	138.518		27.0329	9.26003		FISH	29.3701	23.557	6.29588
																																													IF	59.2063	34.3443	9.1789
55-60		55.3571	44.6913	26.0727	55.1181	24.0186	56.9936	56.044	15.8362	46.9184	55.5556	16.7778	109.852	55.7143	25.9651	83.1904	56.0606	19.6242	41.602	55.5556	28.3909	86.0782	56.25	68.8995	53.6405	55.3846	49.0955	60.3337	55.6604	7.1779	35.905	55.5556	238.834	80.7404	55.4545	18.7505	34.0774	55	37.2792	134.417	55.6604	43.8791	8.9781
		57.1429	55.2041	26.4694	55.9055	34.144	52.1877	57.1429	21.2741	47.0199	56.9444	18.8472	100.31	57.1429	31.3367	77.1633	57.5758	19.1888	41.1816	56.9444	32.3525	82.4774	57.8125	83.8119	50.4552	56.9231	49.9786	60.2568	56.6038	7.3702	35.0684	57.4074	247.934	78.4257	56.3636	23.511	35.4919	56.25	43.3668	116.987	56.6038	49.5758	8.7585
		58.9286	72.9311	25.7819	56.6929	48.4011	50.1956	58.2418	21.7857	47.5536	58.3333	20.3333	87.9323	58.5714	38.1786	69.5265	59.0909	19.4933	38.9015	58.3333	37.4167	77.7176	59.375	100.795	46.4443	58.4615	45.2623	62.4254	57.5472	8.8775	35.9373	59.2593	222.657	74.4396	57.2727	34.56	38.588	57.5	50.424	103.442	57.5472	66.5302	8.7506
					57.4803	52.6568	49.9348	59.3407	22.4734	48.0232	59.7222	20.9697	79.6016							59.7222	45.2443	76.1777							58.4906	8.8654	35.0981				58.1818	50.111	41.176	58.75	69.7602	89.6542	58.4906	77.3566	8.8947
					58.2677	45.3756	47.5799																						59.434	9	35.8714				59.0909	70.0171	44.8592				59.434	83.8027	8.0676
					59.0551	34.363	45.8479
					59.8425	26.0821	42.7344																																							Mean	STDDEV	SEM
Average			57.6088	26.108		37.863	49.3534		20.3423	47.3788		19.232	94.4239		31.8268	76.6267		19.4354	40.5617		35.8511	80.6127		84.5022	50.18		48.1121	61.0053		8.2582	35.576		236.475	77.8686		39.3899	38.8385		50.2075	111.125		64.2289	8.6899		FISH	53.8095	54.3252	14.519
																																													IF	57.0249	27.0834	7.23834
60-65		60.7143	101.775	23.8929	60.6299	25.4019	42.7794	60.4396	23.2644	47.7753	61.1111	23.0015	72.0864	60	43.72	67.42	60.6061	26.874	37.5157	61.1111	48.7963	74.8416	60.9375	105.256	40.9046	60	37.6537	65.0422	60.3774	9	38.108	61.1111	172.79	71.6092	60	76.7729	48.3037	60	88.2444	81.2222	60.3774	76.1844	8.5454
		62.5	134.625	21.625	61.4173	23.96	37.8392	61.5385	27.2194	48.0175	62.5	25.9375	59.4375	61.4286	57.5502	68.9071	62.1212	40.7194	36.9119	62.5	48.3125	75.9375	62.5	96.7266	37.6871	61.5385	32.978	69.3251	61.3208	10.067	39.2349	62.963	128.623	67.2225	60.9091	69.824	50.0949	61.25	93.1201	71.756	61.3208	68.835	7.9557
		64.2857	148.056	18.7296	62.2047	27.6442	35.9259	62.6374	35.5853	46.4117	63.8889	34.8899	50.9693	62.8571	79.9057	68.7273	63.6364	47.6245	35.1048	63.8889	44.2541	74.213	64.0625	80.4798	37.0939	63.0769	30.235	78.2127	62.2642	11.1121	42.0598	64.8148	104.161	63.1618	61.8182	55.2008	49.8452	62.5	78.7969	64.9271	62.2642	62.6189	7.5815
					62.9921	29.2846	34.2143	63.7363	42.7425	43.4026				64.2857	96.6531	66.4745										64.6154	27.1237	91.7338	63.2075	11.9127	42.405				62.7273	52.9181	47.4038	63.75	56.5574	60.6538	63.2075	55.9136	8
					63.7795	34.6776	33.0168	64.8352	50.3565	41.2124																			64.1509	13.0987	43.6016				63.6364	61.2027	44.1786				64.1509	55.4058	7.9536
					64.5669	41.0085	30.5742																												64.5455	78.5654	39.1929									Mean	STDDEV	SEM
Average			128.152	21.4158		30.3295	35.725		35.8336	45.3639		27.943	60.8311		69.4572	67.8822		38.406	36.5108		47.121	74.9974		94.154	38.5619		31.9976	76.0785		11.0381	41.0819		135.191	67.3312		65.7473	46.5032		79.1797	69.6398		63.7915	8.00724		FISH	61.3101	36.1062	9.64979
																																													IF	49.2807	20.0556	5.36007
65-70		66.0714	136.654	17.0446	65.3543	50.9634	28.734	65.9341	65.8637	38.9749	65.2778	45.1838	49.2759	65.7143	106.777	61.1047	65.1515	44.2653	33.2876	65.2778	41.7339	66.1941	65.625	63.2032	36.5521	66.1538	23.9202	110.263	65.0943	16.4075	44.034	66.6667	87.6273	59.3409	65.4545	92.5663	34.9183	65	49.7208	57.6667	65.0943	55.6023	7.5629
		67.8571	109.763	14.8724	66.1417	60.8028	30.4014	67.033	76.6759	36.733	66.6667	57.7222	47.6667	67.1429	113.825	55.2002	66.6667	33.5173	32.8023	66.6667	43.7037	58.2593	67.1875	52.6976	35.8797	67.6923	21.1074	132.362	66.0377	18.5946	44.1504	68.5185	81.0341	58.0369	66.3636	93.5296	31.0808	66.25	48.7016	55.5151	66.0377	56.9368	7.4452
		69.6429	78.727	14	66.9291	58.3079	29.4168	68.1319	79.9742	34.5174	68.0556	65.2676	47.2431	68.5714	113.292	49.6461	68.1818	24.5685	30.388	68.0556	46.6202	49.8846	68.75	40.5385	35.0479	69.2308	18.9761	151.788	66.9811	24.5368	43.2554				67.2727	81.2846	28.751	67.5	45.7823	52.9424	66.9811	50.993	8.099
					67.7165	49.2206	28.0274	69.2308	76.3403	34.0115	69.4444	59.4342	48.2288				69.697	23.2883	29.6301	69.4444	52.3266	45.2819							67.9245	34.0744	42.5116				68.1818	58.4106	27.6537	68.75	45.0208	50.3911	67.9245	47.5173	9.0679
					68.5039	34.7346	28.3058																						68.8679	44.1533	40.7138				69.0909	42.2141	26.2416				68.8679	50.7432	9.7998
					69.2913	24.0334	29.9348																						69.8113	59.4039	37.5094										69.8113	55.3509	10.5034			Mean	STDDEV	SEM
Average			108.381	15.3057		46.3438	29.1367		74.7135	36.0592		56.902	48.1036		111.298	55.317		31.4098	31.527		46.0961	54.905		52.1464	35.8266		21.3346	131.471		32.8617	42.0291		84.3307	58.6889		73.601	29.7291		47.3064	54.1288		52.8573	8.74637		FISH	59.9702	26.2921	7.02685
																																													IF	45.0696	28.0273	7.49062
70-75		71.4286	53.2551	14.4592	70.0787	18.9849	31.5556	70.3297	70.8926	32.1573	70.8333	49.6875	49.2248	70	103.43	43.83	71.2121	23.1362	29.8525	70.8333	68.8171	45.2002	70.3125	37.2244	35.4251	70.7692	17.3683	166.582	70.7547	87.8943	35.4623	70.3704	84.9649	55.6281	70	37.0806	25.0393	70	45.4667	48.8167	70.7547	79.5511	10.3699
		73.2143	40.5906	15.6722	70.8661	15.157	35.3542	71.4286	69.6576	30.025	72.2222	39.3611	55.6505	71.4286	86.898	39.0561	72.7273	23.141	30.6173	72.2222	93.9877	43.714	71.875	32.4631	35.8679	72.3077	16.5167	179.53	71.6981	101.098	31.2187	72.2222	82.9229	51.8675	70.9091	35.2298	23.9449	71.25	52.3266	47.36	71.6981	119.269	12.0955
					71.6535	13.5843	37.4644	72.5275	70.8989	30.7886	73.6111	35.1723	62.668	72.8571	70.3212	35.5	74.2424	23.9054	30.4685	73.6111	104.109	45.601	73.4375	29.394	36.0419	73.8462	15.2488	183.323	72.6415	90.7669	27.496	74.0741	87.0327	48.8883	71.8182	32.676	23.009	72.5	68.6538	47.7872	72.6415	153.152	12.9885
					72.4409	12.2123	40.8675	73.6264	68.2806	30.1729				74.2857	60.0898	35.7518													73.5849	78.0705	24.8113				72.7273	29.6148	23.8162	73.75	89.7878	44.1818	73.5849	156.791	13.018
					73.2283	11.2499	48.0709	74.7253	68.7915	29.2058																			74.5283	58.4765	22.7814				73.6364	29.0993	25.4631				74.5283	130.642	13.911
					74.0157	10.1013	54.4012																												74.5455	28.6386	27.5111
					74.8031	10.1481	64.4536																																							Mean	STDDEV	SEM
Average			46.9228	15.0657		4.12359	23.9961		69.7042	30.4699		41.407	55.8478		80.1848	38.5345		23.3942	30.3128		88.9713	44.8384		33.0272	35.7783		16.3779	176.478		83.2612	28.3539		84.9735	52.128		32.0565	24.7973		64.0587	47.0364		127.881	12.4766		FISH	56.8817	33.149	8.85944
																																													IF	44.0081	38.8029	10.3705
75-80		75	32.375	18.5	75.5906	11.6723	71.9814	75.8242	65.3304	28.617	75	35.8125	73.125	75.7143	52.6061	39.2718	75.7576	23.198	29.4953	75	98.1667	45.5417	75	27.2658	38.2877	75.3846	13.7301	179.062	75.4717	41.5841	21.3648	75.9259	102.544	45.561	75.4545	27.7469	30.7192	75	101.431	46.3819	75.4717	88.1471	13.1936
		76.7857	27.3163	23.6084	76.378	9.4407	84.0284	76.9231	60.3449	28.635	76.3889	35.382	86.0458	77.1429	46.8143	45.7429	77.2727	20.6734	30.1183	76.3889	78.3266	51.5013	76.5625	25.9966	45.5655	76.9231	12.5716	176.39	76.4151	35.713	21	77.7778	125.106	43.0354	76.3636	25.99	35.7659	76.25	86.2858	55.723	76.4151	55.5117	14.9716
		78.5714	23.9184	26.6684	77.1654	8.9844	93.0143	78.022	53.1275	28.1	77.7778	31.6914	97.8519	78.5714	41.0153	53.4541	78.7879	20.0579	32.0265	77.7778	73.856	61.6296	78.125	23.0077	50.4174	78.4615	12.6415	170.659	77.3585	35.1222	21.5763	79.6296	135.189	41.5141	77.2727	23.4973	41.0095	77.5	61.4698	70.5344	77.3585	41.3265	14.9401
					77.9528	7.7175	94.1451	79.1209	53.6708	28.6681	79.1667	29.4023	106.554							79.1667	70.7569	71.2627	79.6875	23.5552	53.7858				78.3019	37.8029	22.014				78.1818	20.7764	48.4593	78.75	39.0116	87.6828	78.3019	35.2001	14.9094
					78.7402	7.7366	95.045																						79.2453	46.591	24.9498				79.0909	16.7798	56.7649				79.2453	27.8716	14.1025
					79.5276	7.0212	98.132																																							Mean	STDDEV	SEM
Average			27.8699	22.9256		8.76212	89.391		58.1184	28.505		33.0721	90.8941		46.8119	46.1563		21.3098	30.5467		80.2766	57.4838		24.9563	47.0141		12.9811	175.37		39.3626	22.181		120.946	43.3702		22.9581	42.5438		72.0494	65.0805		49.6114	14.4234		FISH	44.2204	29.504	7.88528
																																													IF	55.4204	40.1338	10.7262
80-85		80.3571	21.4043	28.2832	80.315	6.5872	100.218	80.2198	45.1658	29.0913	80.5556	25.8926	114.765	80	36.52	65.02	80.303	18.8073	36.1403	80.5556	61.0643	88.6862	81.25	21.3718	55.4858	80	12.3147	162.749	80.1887	58.7127	27.6241	81.4815	120.603	42.3558	80	13.2851	63.9467	80	28.7111	108.756	80.1887	23.4968	15.2516
		82.1429	19.3929	30.6582	81.1024	6.3441	99.8688	81.3187	39.089	29	81.9444	20.0553	126.168	81.4286	32.25	85.1863	81.8182	16.9809	42.147	81.9444	46.7497	105.526	82.8125	18.9536	55.5779	81.5385	12.6954	155.539	81.1321	66.0259	31.9615	83.3333	93.9537	43.4123	80.9091	11.3179	70.4562	81.25	25.3385	124.97	81.1321	21.627	16.2463
		83.9286	17.7194	32.6403	81.8898	5.9287	98.4344	82.4176	37.0405	30.0022	83.3333	18.2014	135.91	82.8571	26.0427	105.073	83.3333	14.1904	45.6838	83.3333	41.1481	126.519	84.375	17.8144	58.4287	83.0769	11.8985	151.792	82.0755	60.2176	37.1625				81.8182	9.6095	77.7114	82.5	21.7823	146.776	82.0755	17.3956	18.7467
					82.6772	6	92.9472	83.5165	35.3903	31.5394	84.7222	15.6484	139.061	84.2857	23.508	114.452	84.8485	12.5973	47.6507	84.7222	39.3843	141.287				84.6154	11.6714	145.155	83.0189	45.323	41.4065				82.7273	8.6273	82.2458	83.75	18.9777	168.548	83.0189	13.4734	18.7599
					83.4646	5.6565	93.066	84.6154	32.59	32.3846																			83.9623	33.4626	44.4164				83.6364	7.8476	86.2223				83.9623	10.942	19.3296
					84.252	5.0225	92.8876																						84.9057	26.0972	47.3905				84.5455	7.2535	88.6934				84.9057	10.2717	19.3312			Mean	STDDEV	SEM
Average			19.5055	30.5272		5.92317	96.2371		37.8551	30.4035		19.9494	128.976		29.5802	92.4326		15.644	42.9055		47.0866	115.504		19.3799	56.4975		12.145	153.809		48.3065	38.3269		107.278	42.8841		9.65682	78.2126		23.7024	137.263		16.2011	17.9442		FISH	29.4439	24.97	6.67351
																																													IF	75.8516	43.3979	11.5986
85-90		85.7143	16.4286	34.4694	85.0394	4.5557	89.0179	85.7143	30.2581	33.2371	86.1111	14.2787	140.931	85.7143	22.1939	116.551	86.3636	12.4914	47.81	86.1111	33.6934	160.925	85.9375	14.9276	64.1221	86.1538	11.1069	142.726	85.8491	21.2062	49.5102	85.1852	74.3104	44.4358	85.4545	6.7428	90.5992	85	16.2917	184.508	85.8491	9.0922	19.9493
		87.5	15.4375	35.4375	85.8268	4.5048	85.5264	86.8132	27.1043	34.2465	87.5	13.3125	140.836	87.1429	20.4382	116.948	87.8788	11.959	46.9185	87.5	30.75	160.25	87.5	14.0795	68.7386	87.6923	11.1146	143.173	86.7925	17.3359	50.833	87.037	72.957	44.9768	86.3636	6.3019	92.6423	86.25	15.9915	198.65	86.7925	8.01	19.582
		89.2857	14.574	36.0281	86.6142	4.8161	81.9885	87.9121	24.5932	36.2409	88.8889	12.3549	142.287	88.5714	20.239	118.942	89.3939	14.5909	44.1083	88.8889	30.5638	156.56	89.0625	13.8243	69.7056	89.2308	10.4926	150.113	87.7358	15.6808	53.1001	88.8889	82.4822	44.6507	87.2727	6.0709	92.5198	87.5	14.4167	197.054	87.7358	8.0437	20.9166
					87.4016	4.6141	77.7859	89.011	23.7089	38.6655																			88.6792	14.3045	54.1374				88.1818	4.2717	91.4863	88.75	13.2216	192.095	88.6792	7.9688	19.4818
					88.189	4.3379	78.1039																						89.6226	11.219	51.8344				89.0909	4.1095	88.7375				89.6226	7.8484	19.5225
					88.9764	4.882	78.2393
					89.7638	4.706	79.8067																																							Mean	STDDEV	SEM
Average			15.48	35.3117		4.63094	81.4955		26.4161	35.5975		13.3154	141.351		20.957	117.48		13.0138	46.2789		31.6691	159.245		14.2771	67.5221		10.9047	145.337		15.9493	51.883		76.5832	44.6878		5.49936	91.197		14.9804	193.077		8.19262	19.8904		FISH	19.4192	17.3865	4.64675
																																													IF	87.8825	52.5586	14.0469
90-95		91.0714	14	37.0255	90.5512	4	84.5299	90.1099	21.8211	40.1944	90.2778	10.7787	149.473	90	18.68	119.17	90.9091	20.3566	39.7358	90.2778	28.5833	146.496	90.625	12.2496	67.149	90.7692	10.7378	154.916	90.566	10.7277	51.9409	90.7407	87.0713	43.9411	90	4.1371	81.8678	90	12.1667	192.783	90.566	7.2431	21.5906
		92.8571	13.3878	37.352	91.3386	4.0714	86.8515	91.2088	20.0295	42.4372	91.6667	9.5417	160.875	91.4286	16.1804	120.396	92.4242	21.9579	36.4904	91.6667	26.8472	138.023	92.1875	11.7568	63.7572	92.3077	10.4519	159.574	91.5094	8.5556	53.4078	92.5926	76.8779	42.5811	90.9091	3.7501	79.2244	91.25	10.9012	198.923	91.5094	7.3513	21.7482
		94.6429	12.3151	37.639	92.126	4.245	90.4623	92.3077	18.7103	44.9874	93.0556	9.0558	171.153	92.8571	14.2602	122.837	93.9394	18.4628	36.1117	93.0556	23.8101	133.695	93.75	10.6593	58.9874	93.8462	11.646	166.512	92.4528	8	53.327	94.4444	59.5837	41.2017	91.8182	3	78.2186	92.5	10	206.163	92.4528	7.0565	23.03
					92.9134	4.9499	89.758	93.4066	16.6026	44.6158	94.4444	8.6944	178.862	94.2857	14.3429	127.644				94.4444	21.8416	132.418							93.3962	7.5283	53.5355				92.7273	3	80.413	93.75	9.4792	216.246	93.3962	7.6236	23.2735
					93.7008	4	92.8563	94.5055	14.8309	45.545																			94.3396	6.1195	52.9273				93.6364	3	87.9288				94.3396	6.6618	23.0786
					94.4882	4	91.6044																												94.5455	3	95.2576									Mean	STDDEV	SEM
Average			13.2343	37.3388		4.21105	89.3437		18.3989	43.556		9.51765	165.091		15.8659	122.512		20.2591	37.446		25.2706	137.658		11.5552	63.2979		10.9452	160.334		8.18622	53.0277		74.511	42.5746		3.31453	83.8184		10.6368	203.529		7.18726	22.5442		FISH	16.6495	17.0919	4.56799
																																													IF	90.1479	55.6857	14.8826
95-100		96.4286	10.6786	37.3444	95.2756	4.91	91.4804	95.6044	16.0857	43.3952	95.8333	7.7708	177.287	95.7143	13.9027	135.786	95.4545	13.754	35.701	95.8333	20.3762	133.773	95.3125	9.5032	57.8784	95.3846	11.3092	173.502	95.283	5.5723	50.305	96.2963	46.4539	40.9186	95.4545	2.6315	96.1082	95	8.1764	216.578	95.283	5.674	24.0433
		98.2143	8.9847	36.4911	96.063	4.702	91.1185	96.7033	14.6945	43.1527	97.2222	6.8472	163.719	97.1429	13.3788	145.3	96.9697	10.1693	33.7882	97.2222	19.09	141.485	96.875	9.2394	61.6021	96.9231	10.7636	176.702	96.2264	5.9338	48.0093	98.1481	36.8606	40.3837	96.3636	0	96.4069	96.25	7.7013	201.94	96.2264	4.4322	24.6308
		100	7.5	34	96.8504	4.876	87.686	97.8022	13.0649	44.0324	98.6111	6	140.058	98.5714	12.8106	148.425	98.4848	8.9082	34.3914	98.6111	17.412	142.971	98.4375	10.7081	64.5737	98.4615	11.1579	180.246	97.1698	5.1602	45.9838	100	32.9395	41.5559	97.2727	0	93.9074	97.5	7.567	180.705	97.1698	5.2011	24.7057
					97.6378	5	83.3567	98.9011	14.2457	44.6974	100	6	111	100	12.5	144.5	100	7.5891	35.1486	100	16	135	100	10.1501	66.6688	100	10.7423	178.847	98.1132	5.3899	43.9509				98.1818	0	86.282	98.75	6.2292	158.746	98.1132	5.8903	24.7807
					98.4252	4.8105	79.3702	100	15.1041	47.4282																			99.0566	5.9746	41.4711				99.0909	0	78.2936	100	6.3333	144.333	99.0566	6.0672	24.7162
					99.2126	4.8094	76.001																						100	5.3333	38.4444				100	0	74.5622				100	7.6778	23.0718
					100	4.3817	71.3658																																							Mean	STDDEV	SEM
Average			9.05443	35.9452		4.78423	82.9112		14.639	44.5412		6.6545	148.016		13.148	143.503		10.1052	34.7573		18.2195	138.307		9.9002	62.6808		10.9932	177.324		5.56068	44.6941		38.7513	40.9527		0.438583	87.5934		7.20144	180.46		5.82377	24.3247		FISH	11.091	8.80611	2.35353
																																													IF	89.0009	54.7532	14.6334

## Sheet: Summary
% Chromosome Length		Mean	STDEV	SEM
5	FISH	7.16691	4.06448	1.08628
	IF	38.2959	26.1815	6.99729
10	FISH	7.19399	4.11897	1.10084
	IF	51.2405	29.1062	7.77896
15	FISH	7.20544	3.60453	0.963351
	IF	69.719	38.8272	10.377
20	FISH	6.85635	3.21094	0.858159
	IF	77.6373	43.6803	11.6741
25	FISH	7.11651	3.0898	0.825784
	IF	76.4331	40.1172	10.7218
30	FISH	8.29674	4.05903	1.08482
	IF	71.0089	33.986	9.08314
35	FISH	10.5884	7.21148	1.92735
	IF	61.199	25.1193	6.7134
40	FISH	14.182	9.58924	2.56283
	IF	61.5207	25.1902	6.73236
45	FISH	28.098	35.199	9.40732
	IF	58.6635	27.354	7.31065
50	FISH	26.5272	23.346	6.23949
	IF	59.8373	29.8228	7.97049
55	FISH	29.3701	23.557	6.29588
	IF	59.2063	34.3443	9.1789
60	FISH	53.8095	54.3252	14.519
	IF	57.0249	27.0834	7.23834
65	FISH	61.3101	36.1062	9.64979
	IF	49.2807	20.0556	5.36007
70	FISH	59.9702	26.2921	7.02685
	IF	45.0696	28.0273	7.49062
75	FISH	56.8817	33.149	8.85944
	IF	44.0081	38.8029	10.3705
80	FISH	44.2204	29.504	7.88528
	IF	55.4204	40.1338	10.7262
85	FISH	29.4439	24.97	6.67351
	IF	75.8516	43.3979	11.5986
90	FISH	19.4192	17.3865	4.64675
	IF	87.8825	52.5586	14.0469
95	FISH	16.6495	17.0919	4.56799
	IF	90.1479	55.6857	14.8826
100	FISH	11.091	8.80611	2.35353
	IF	89.0009	54.7532	14.6334
