# Supplementary material for: Large domains of heterochromatin direct the formation of short mitotic chromosome loops
Source: eLife. 2020 Sep 11;9:e57212. doi: 10.7554/eLife.57212 (PMC7515631; doi:10.7554/eLife.57212)
Supplement: Figure 3—figure supplement 1—source data 1. [file elife-57212-fig3-figsupp1-data1.xlsx]

## Sheet: All
2	FISH		IF	5	FISH		IF	7	FISH		IF	12	FISH		IF	14	FISH		IF	18	FISH		IF	21	FISH		IF	26	FISH		IF	6	FISH		IF	7	FISH		IF	8	FISH		IF	13	FISH		IF	15	FISH
X	Y	X	Y	X	Y	X	Y	X	Y	X	Y	X	Y	X	Y	X	Y	X	Y	X	Y	X	Y	X	Y	X	Y	X	Y	X	Y	X	Y	X	Y	X	Y	X	Y	X	Y	X	Y	X	Y	X	Y	X	Y
0	10	0	120	0	15	0	82	0	8	0	145	0	7	0	77	0	18	0	168	0	22	0	106	0	15	0	123	0	22	0	199	0	7	0	133	0	16	0	115	0	10	0	124	0	12	0	158	0	6
1	9.984	1	113.91	1	16.899	1	82.2332	1	11	1	147	1	6.8242	1	82.8892	1	18.698	1	169.227	1	21.2705	1	103.262	1	13.83	1	132.704	1	18.353	1	202.574	1	6.51	1	138.179	1	15.402	1	119.322	1	8.3787	1	122	1	10.128	1	147.535	1	6.4238
2	8.865	2	116.297	2	14.0031	2	82.5995	2	7	2	153	2	9.2764	2	89.4755	2	17.492	2	163.678	2	20.8311	2	93.4974	2	13.841	2	139.962	2	21.426	2	198.926	2	7.267	2	143.919	2	17.677	2	116.241	2	7.9289	2	123.498	2	11.948	2	133.31	2	7.813
3	8.103	3	119.964	3	14.7988	3	92.8834	3	9	3	153	3	11.6498	3	99.8274	3	18.677	3	148.239	3	19.958	3	76.7333	3	15.406	3	142.233	3	21.957	3	187.115	3	6.488	3	139.664	3	15.352	3	110.445	3	8.6655	3	119.588	3	10.32	3	113.072	3	8.2477
4	8.421	4	124.619	4	14.2676	4	92.3349	4	10	4	154	4	10.9499	4	108.347	4	19.185	4	130.408	4	19.9398	4	61.9694	4	15.062	4	141.762	4	18.868	4	168.471	4	6.896	4	129.936	4	15.202	4	91.6283	4	7.8873	4	106.118	4	10.211	4	101.371	4	7.0241
5	8.73	5	129.127	5	12.5048	5	88.5099	5	11	5	158	5	8.6016	5	100.503	5	20.171	5	115.575	5	19.6242	5	48.2895	5	14.877	5	137.617	5	21.217	5	142.715	5	7.433	5	115.25	5	15.078	5	74.779	5	7.7513	5	87.5456	5	11.885	5	93.037	5	5.7628
6	8.347	6	124.379	6	12.5997	6	87.0053	6	12	6	141	6	7.4959	6	90.1215	6	23.727	6	104.099	6	19.8964	6	38.4257	6	15.277	6	125.461	6	20.869	6	117.672	6	7.54	6	97.17	6	14.903	6	66.4502	6	8.2498	6	70.2872	6	10.663	6	88.501	6	5.4983
7	8.384	7	114.045	7	13.9949	7	85.7047	7	9	7	132	7	6.4118	7	77.1154	7	23.198	7	95.596	7	19.1671	7	32.4237	7	15.106	7	111.759	7	22.018	7	93.64	7	8.88	7	77.585	7	13.347	7	61.6437	7	6.2914	7	57.6684	7	10.499	7	88.507	7	7.1503
8	6.891	8	98.5826	8	11.8093	8	84.2733	8	10.374	8	110.557	8	5.7215	8	63.1332	8	25.763	8	84.996	8	18.6057	8	31.2705	8	12.256	8	98.563	8	23.493	8	79.023	8	8.082	8	61.853	8	12.724	8	58.7382	8	6.6569	8	49.3238	8	9.411	8	85.323	8	7.0077
9	7.095	9	81.2297	9	12.8945	9	88.0815	9	9.74	9	92.0049	9	4.8259	9	53.9028	9	32.452	9	78.358	9	18.6333	9	29.6896	9	13.661	9	85.347	9	21.844	9	72.507	9	8.003	9	59.997	9	13.8	9	58.5582	9	7.6945	9	48.5477	9	8.177	9	77.745	9	7
10	7	10	70.9217	10	13.9944	10	91.9778	10	12.15	10	74.0617	10	4.9953	10	48.1065	10	34.763	10	74.474	10	19	10	28.5915	10	14.362	10	80.319	10	21.173	10	68.718	10	8.627	10	59.184	10	14.25	10	60.0994	10	6.9441	10	53.2082	10	9.35	10	70.339	10	6.7644
11	7.644	11	66.7364	11	14.6297	11	96.1422	11	10.404	11	57.097	11	5	11	41.2966	11	35.301	11	75.274	11	19.5234	11	27.9632	11	13.484	11	74.855	11	20.501	11	62.271	11	8.73	11	61.193	11	13.573	11	62.0264	11	8.0385	11	54.729	11	8.913	11	59.56	11	7.7512
12	7.947	12	64.5581	12	17.578	12	92.822	12	10.637	12	50.2451	12	4.0464	12	40.0515	12	36.629	12	77.57	12	20.1055	12	27.5583	12	13.927	12	71.148	12	20.749	12	54.67	12	9.65	12	64.78	12	14.701	12	63.9152	12	7.7511	12	54.9714	12	9.968	12	49.245	12	6.968
13	6.709	13	65.3729	13	19.4534	13	88.5653	13	10.901	13	49.8377	13	4	13	35.6579	13	31.382	13	83.727	13	20.0812	13	29.3191	13	14.631	13	67.31	13	24.213	13	48.94	13	9.372	13	66.865	13	13.755	13	61.6834	13	8.4598	13	56.926	13	8.831	13	41.896	13	6.8449
14	6.462	14	63.5834	14	18.4096	14	81.7193	14	10.866	14	53.7808	14	4.218	14	34.236	14	32.346	14	79.454	14	18.7865	14	30.0642	14	14.475	14	61.999	14	22.227	14	44.885	14	9.113	14	64.138	14	14.731	14	61.3567	14	7.1106	14	55.3818	14	9.313	14	38.659	14	6.4024
15	7.112	15	60.4442	15	16.0203	15	80.0136	15	10.034	15	53.3589	15	3.7186	15	34.9341	15	28.371	15	74.309	15	18.0569	15	32.4044	15	15.871	15	59.893	15	18.43	15	41.781	15	9.734	15	64.317	15	16.477	15	54.611	15	6.632	15	62.5179	15	7.736	15	39.217	15	7.1044
16	7.677	16	58.0351	16	15.075	16	80.2652	16	9.331	16	50.2857	16	4.5318	16	32.9616	16	24.998	16	65.834	16	17.3657	16	35.2313	16	16.01	16	58.501	16	16.684	16	40.037	16	9.017	16	57.01	16	19.171	16	49.9788	16	7.06	16	64.35	16	7.955	16	42.433	16	8.2391
17	6.948	17	53.2118	17	15.6937	17	84.5588	17	7.453	17	43.3289	17	4.0333	17	32.5267	17	26.898	17	58.508	17	18.3019	17	37.6355	17	14.55	17	60.545	17	23.245	17	39.652	17	9.653	17	53.16	17	17.946	17	48.6548	17	8	17	56.17	17	9.048	17	43.02	17	7.285
18	5.727	18	49.6188	18	14.8106	18	84.402	18	10.299	18	38.3526	18	3.6112	18	30.7214	18	25.566	18	56.909	18	18.0498	18	41	18	14.468	18	63.474	18	21.501	18	42.094	18	8.289	18	51.118	18	18.774	18	48.77	18	7.47	18	46.23	18	10.103	18	42.418	18	6.3246
19	6.166	19	46.9677	19	12.6551	19	82.4864	19	11.724	19	33.8169	19	3.9757	19	29.7435	19	23.982	19	60.384	19	17.1476	19	41	19	15.224	19	66.083	19	21.225	19	46.812	19	9.083	19	51.838	19	20.389	19	53.7715	19	7.53	19	43.06	19	9.019	19	44.097	19	7.1115
20	6.951	20	41.8674	20	11.6774	20	78.3792	20	10.694	20	30.5079	20	4.4758	20	31.6031	20	24.415	20	61.89	20	17.9566	20	42.3361	20	16.689	20	69.591	20	21.778	20	51.125	20	9.694	20	51.787	20	20.108	20	59.203	20	8	20	39.23	20	10.654	20	47.03	20	6.6227
21	6.675	21	39.7089	21	11.9965	21	73.0606	21	9.539	21	32.2613	21	3.9145	21	34.4603	21	25.885	21	65.047	21	18.3628	21	42.0879	21	15.712	21	73.095	21	27.383	21	53.996	21	8.265	21	48.91	21	21.072	21	63.1184	21	8	21	33.94	21	10.028	21	49.503	21	6.948
22	6.042	22	40.0246	22	11.7362	22	70.957	22	8.794	22	37.0119	22	3.9944	22	35.9036	22	23.59	22	65.638	22	18.9814	22	41.0142	22	16.807	22	78.128	22	27.831	22	54.211	22	7.976	22	47.734	22	22.439	22	67.4893	22	8	22	32.47	22	12.956	22	47.696	22	6.2692
23	7.255	23	42.7224	23	14.433	23	68.8597	23	12.544	23	42.145	23	4.0374	23	35.1106	23	23.346	23	64.886	23	19.6716	23	39.3064	23	17.52	23	81.008	23	22.11	23	52.974	23	9.552	23	43.772	23	25.029	23	70.5233	23	8	23	33.06	23	12.15	23	44.708	23	6.9722
24	6.752	24	47.9036	24	12.2298	24	69.1956	24	10.666	24	45.6264	24	4.8282	24	34.0038	24	23.116	24	64.668	24	18.7357	24	36.9352	24	18.358	24	80.414	24	24.185	24	49.922	24	9.377	24	43.591	24	25.671	24	69.5194	24	9.06	24	35.59	24	13.722	24	39.642	24	7.8218
25	6.94	25	49.2837	25	13.3153	25	63.9092	25	9.295	25	46.7623	25	4.2559	25	31.8179	25	23.253	25	64.756	25	19.4639	25	36.0167	25	17.911	25	76.398	25	25.166	25	46.844	25	8.686	25	48.903	25	27.911	25	68.7678	25	8.41	25	37.53	25	14.405	25	34.982	25	7.6163
26	5.856	26	48.6055	26	12.4168	26	60.7776	26	10.045	26	45.5412	26	4.2852	26	28.0886	26	21.23	26	67.699	26	19.929	26	34.8049	26	16.932	26	70.827	26	25.959	26	45.006	26	10.256	26	51.805	26	32.014	26	75.2235	26	9.12	26	40.12	26	15.525	26	30.506	26	7.5898
27	7.17	27	45.0872	27	12.1035	27	55.0869	27	10.272	27	42.5752	27	4.3731	27	26.17	27	23.729	27	68.238	27	20.2089	27	33.7856	27	16.96	27	67.174	27	23.611	27	42.447	27	8.909	27	53.688	27	37.643	27	86.393	27	9.94	27	42.53	27	14.788	27	28.5	27	9.2729
28	7.296	28	41.3334	28	12.0672	28	51.1945	28	10.018	28	38.1939	28	4.461	28	25.1084	28	25.782	28	67.918	28	20.8961	28	33.6682	28	17.121	28	63.793	28	20.1	28	38.485	28	10.412	28	51.734	28	47.631	28	106.74	28	9	28	41.94	28	17.015	28	27.946	28	10.4992
29	7	29	39.8265	29	12.0672	29	54.97	29	10.708	29	33.9513	29	4.0616	29	28.5511	29	26.023	29	69.431	29	19.2047	29	33.2971	29	17.465	29	64.764	29	19.977	29	37.697	29	11	29	46.332	29	64.721	29	121.633	29	8.47	29	41	29	20.108	29	29.115	29	10.3348
30	6.73	30	39.5935	30	13.9667	30	58.9339	30	11.849	30	31.8496	30	4.8839	30	30.4468	30	25.617	30	72.127	30	20.677	30	34.0732	30	16.483	30	68.941	30	20.167	30	36.012	30	10.868	30	43.899	30	85.051	30	132.732	30	8.53	30	43.65	30	17.719	30	33.103	30	10.1431
31	7.78	31	40.9208	31	12.095	31	64.7009	31	13.19	31	29.7501	31	3.8777	31	34.2448	31	25.417	31	75.998	31	19.7295	31	36.0241	31	15.679	31	73.203	31	21.034	31	36.511	31	9.702	31	40.154	31	96.922	31	125.894	31	10.59	31	44.41	31	18.92	31	38.804	31	10.4325
32	7.418	32	40.8713	32	13.3463	32	66.7059	32	13.036	32	31.7822	32	3.8126	32	37.4411	32	26.817	32	76.271	32	19.5339	32	37.64	32	16.259	32	76.62	32	22.512	32	36.739	32	11.072	32	44.119	32	91.094	32	118.687	32	10.41	32	44.06	32	16.448	32	42.521	32	9.9797
33	6.675	33	40.3276	33	13.2159	33	63.5455	33	13.234	33	31.3366	33	3.9005	33	39.4715	33	29.52	33	74.973	33	21.0831	33	40.3767	33	16.644	33	80.79	33	24.624	33	38.252	33	11.828	33	53.367	33	86.154	33	94.6162	33	10.59	33	43.41	33	16.015	33	45.588	33	10.9782
34	6.31	34	39.8579	34	12.1848	34	64.4004	34	14.58	34	32.377	34	3.1301	34	39.9551	34	32.128	34	75.803	34	22.2224	34	41.9328	34	17.373	34	85.002	34	22.965	34	38.542	34	11.953	34	56.977	34	73.89	34	81.0245	34	12	34	43.59	34	15.964	34	46.927	34	10.1963
35	7.427	35	40.037	35	13.42	35	63.2645	35	16.388	35	32.8602	35	3.0639	35	38.2119	35	33.368	35	75.697	35	21.0197	35	42.3072	35	17.996	35	85.979	35	21.317	35	41.959	35	12.038	35	57.078	35	60.682	35	69.7714	35	12	35	45	35	14.678	35	44.074	35	9.4611
36	7.231	36	39.3517	36	13.8677	36	65.2438	36	15.419	36	31.1785	36	4.3592	36	37.4997	36	36.052	36	73.991	36	21.3676	36	42.1565	36	19.192	36	84.144	36	23.375	36	48.324	36	12.387	36	49.746	36	61.175	36	60.2352	36	12	36	45	36	14.996	36	42.954	36	9.5455
37	7.24	37	39.7602	37	12.5319	37	71.6778	37	14.769	37	27.2633	37	3.6479	37	36.2141	37	43.221	37	70.22	37	21.3186	37	42.2804	37	18.185	37	79.896	37	24.907	37	54.464	37	12.675	37	43.276	37	77.722	37	58.9733	37	13.59	37	45.53	37	16.686	37	44.463	37	10.3314
38	8.413	38	38.5874	38	13.298	38	78.0021	38	13.834	38	23.4555	38	4.0378	38	34.9205	38	45.799	38	65.731	38	21.4123	38	40.5208	38	19.11	38	75.76	38	23.947	38	62.685	38	11.711	38	35.949	38	103.859	38	58.9652	38	16.06	38	48.65	38	14.91	38	48.748	38	12.3596
39	7.918	39	38.0661	39	13.6959	39	87.4545	39	13.571	39	20.9807	39	4.8696	39	33.1053	39	44.874	39	60.592	39	22.6921	39	39.6539	39	18.271	39	72.034	39	24.663	39	68.946	39	13.154	39	34.88	39	124.129	39	56.3779	39	15.94	39	48.35	39	16.111	39	54.819	39	12.5856
40	8.459	40	39.2627	40	12.7601	40	94.3024	40	13.858	40	20.2601	40	4.6025	40	31.9052	40	44.527	40	61.561	40	28.7932	40	38.1614	40	18.864	40	69.017	40	24.414	40	68.05	40	13.282	40	39.499	40	121.117	40	53.825	40	14.47	40	43.88	40	14.678	40	59.169	40	11.4721
41	7.35	41	39.1064	41	13.5893	41	98.7342	41	13.756	41	20.9181	41	4.0864	41	30.5929	41	49.144	41	63.382	41	38.5764	41	37.8364	41	18.623	41	69.245	41	23.984	41	65.629	41	13.383	41	45.078	41	113.908	41	57.6859	41	12.9616	41	42.3794	41	14.993	41	59.329	41	10.4858
42	7.132	42	38.0755	42	14.0556	42	99.6904	42	11.482	42	23.7006	42	4.8438	42	31.2958	42	49.06	42	68.662	42	48.9446	42	35.3555	42	18.9	42	68.785	42	26.634	42	63.525	42	14.546	42	51.298	42	113.285	42	67.7739	42	12.6841	42	46.133	42	15.987	42	55.809	42	11.092
43	7.792	43	37.7278	43	15.1655	43	95.5957	43	12.642	43	26.1396	43	5.2663	43	34.1469	43	50.424	43	75.47	43	53.844	43	32.7853	43	19.653	43	67.668	43	19.91	43	63.071	43	15.286	43	53.542	43	103.793	43	81.1767	43	13.0806	43	54.3676	43	15.82	43	54.977	43	13.1113
44	7.962	44	38.4819	44	15.6234	44	92.9725	44	11.526	44	28.2597	44	4.2348	44	39.3821	44	58.949	44	80.477	44	52.5484	44	30.0636	44	19.276	44	65.761	44	19.377	44	62.267	44	15.472	44	53.166	44	81.356	44	88.544	44	12.8129	44	59.4006	44	17.997	44	58.425	44	13.6497
45	8.274	45	43.6567	45	15.2051	45	94.003	45	10.774	45	29.6805	45	4.1916	45	40.7815	45	68.319	45	83.31	45	46.3579	45	29.6748	45	19.124	45	63.27	45	22.714	45	62.572	45	17.338	45	50.268	45	66.588	45	87.4094	45	13.2694	45	61.0483	45	20.559	45	63.974	45	16.2242
46	8.199	46	52.6032	46	14.0542	46	93.9071	46	11.95	46	29.3774	46	4.4743	46	41.5773	46	71.025	46	81.983	46	37.5462	46	30.7573	46	19.463	46	62.1	46	24.38	46	67.365	46	20.793	46	45.668	46	59.113	46	85.4753	46	12.1562	46	57.337	46	23.268	46	70.314	46	20.7851
47	8.315	47	66.0059	47	14.2024	47	96.2413	47	10.662	47	29.1598	47	5	47	38.9195	47	75.483	47	79.591	47	31.4615	47	34.7737	47	20.71	47	62.357	47	22.898	47	67.195	47	19.437	47	40.979	47	53.095	47	78.7935	47	12.3744	47	54.2708	47	26.559	47	80.222	47	24.4298
48	8.842	48	75.3911	48	15.8375	48	100.14	48	12.787	48	31.6109	48	4.6167	48	36.1729	48	81.48	48	78.186	48	28.0671	48	40.5802	48	21.577	48	62.584	48	25.693	48	61.23	48	19.828	48	40.083	48	48.275	48	75.7662	48	12.7501	48	49.2142	48	24.723	48	82.48	48	26.4515
49	8.737	49	77.6621	49	16.5064	49	99.9079	49	12	49	32.0373	49	4.8492	49	33.1171	49	88.99	49	75.89	49	25.6999	49	48.5793	49	22.504	49	60.731	49	25.925	49	57.061	49	20.896	49	43.143	49	44.15	49	77.3225	49	12.9339	49	47.5782	49	24.804	49	79.573	49	34.3278
50	8.005	50	72.7507	50	16.8344	50	95.5255	50	10.577	50	32.2259	50	4.7883	50	34.0156	50	97.362	50	74.996	50	24.2954	50	57.4247	50	22.003	50	57.028	50	27.615	50	52.922	50	20.666	50	48.71	50	38.165	50	85.4239	50	14.3728	50	45.1131	50	25.071	50	75.963	50	51.0278
51	8.295	51	62.6212	51	17.9421	51	89.1678	51	11.791	51	30.6798	51	4.8533	51	37.1159	51	105.639	51	74.421	51	24.875	51	64.1783	51	24.223	51	55.246	51	24.339	51	53.652	51	20.739	51	55.469	51	35.415	51	89.7124	51	15.2408	51	43.1371	51	27.854	51	70.262	51	75.805
52	9.619	52	53.5362	52	18.8978	52	80.5079	52	13.121	52	28.7624	52	6.1178	52	40.2071	52	108.906	52	78.112	52	28.0827	52	67.3901	52	25.961	52	51.926	52	23.932	52	55.283	52	21.981	52	62.17	52	37.08	52	78.6258	52	16.6758	52	40.3019	52	31.784	52	63.922	52	92.4354
53	8.73	53	48.7032	53	18.536	53	72.5364	53	14.19	53	26.945	53	5	53	42.9792	53	120.634	53	81.012	53	35.3076	53	66.0768	53	25.684	53	48.457	53	22.485	53	58.914	53	22.208	53	58.226	53	34.002	53	72.4622	53	16.6381	53	44.6729	53	29.489	53	59.07	53	91.3512
54	8.954	54	47.6702	54	19.1301	54	67.1638	54	15.257	54	26.9138	54	5	54	43.8701	54	118.65	54	90.084	54	45.4882	54	63.6279	54	28.548	54	46.245	54	23.463	54	56.437	54	24.325	54	50.317	54	31.236	54	66.4371	54	18.048	54	43.0457	54	30.966	54	51.966	54	84.306
55	9.289	55	44.308	55	19.466	55	64.4554	55	13.234	55	28.977	55	5.4527	55	41.2344	55	104.636	55	93.419	55	53.4998	55	57.7207	55	30.127	55	44.313	55	24.642	55	52.108	55	26.189	55	42.493	55	28.228	55	66.7726	55	18.049	55	44.0078	55	29.899	55	46.362	55	71.4809
56	8.672	56	41.6586	56	20.2847	56	62.8884	56	10.513	56	31.8	56	5.1096	56	37.4193	56	82.636	56	95.803	56	51.4886	56	53.6212	56	31.262	56	45.273	56	27.348	56	46.714	56	25.756	56	36.732	56	22.417	56	65.253	56	25.6868	56	44.2848	56	30.499	56	47.166	56	64.3579
57	9.927	57	39.292	57	22.9314	57	63.3719	57	8.637	57	37.2447	57	5.6243	57	36.8345	57	71.758	57	95.062	57	42.6762	57	51.1331	57	36.065	57	47.98	57	27.007	57	45.805	57	26.6	57	35.568	57	18.985	57	69.1266	57	29.3312	57	45.6061	57	30.444	57	53.319	57	69.1777
58	9.501	58	40.0572	58	24.3108	58	67.7437	58	11	58	39.0012	58	4.5646	58	36.5311	58	62.629	58	91.923	58	34.848	58	48.0885	58	45.25	58	50.575	58	22.996	58	47.465	58	25.472	58	37.224	58	18.089	58	76.1425	58	30.198	58	40.7997	58	35.139	58	59.436	58	83.9608
59	10.909	59	41.5373	59	27.6329	59	78.9363	59	10.622	59	39.9852	59	5.5508	59	39.8179	59	55.842	59	85.691	59	24.5007	59	45.1777	59	56.797	59	53.299	59	19.785	59	51.017	59	22.723	59	43.231	59	15.517	59	76.4762	59	30.2924	59	46.257	59	42.342	59	64.751	59	95.0058
60	9.475	60	45.0085	60	36.0156	60	92.8283	60	10.386	60	42.1312	60	5.2866	60	45.2201	60	51.782	60	78.258	60	21.2007	60	42.6673	60	65.698	60	52.332	60	25.699	60	50.944	60	24.127	60	54.676	60	14.227	60	72.1844	60	34.4169	60	51.9971	60	56.362	60	70.232	60	97.1641
61	9.287	61	47.4176	61	45.5615	61	103.386	61	10.201	61	43.4874	61	5.4465	61	47.8353	61	49.371	61	74.725	61	18.818	61	36.6629	61	67.568	61	51.22	61	27.699	61	47.88	61	26.758	61	63.032	61	13.956	61	67.0826	61	45.5306	61	64.8883	61	77.946	61	81.947	61	98.8723
62	10.026	62	44.9402	62	56.55	62	108.046	62	10.044	62	46.3557	62	4.2112	62	47.5808	62	43.958	62	74.51	62	18.9135	62	31.5899	62	60.599	62	51.512	62	22.432	62	41.103	62	28.718	62	65.943					62	70.256	62	87.5338	62	91.223	62	93.471	62	86.9183
63	9.75	63	40.7883	63	71.9699	63	103.16	63	12.677	63	49.6384	63	4.5007	63	44.933	63	41.779	63	75.116	63	17.8471	63	27.463	63	50.428	63	50.082	63	25.95	63	36.299	63	27.286	63	67.968					63	96.3395	63	109.544	63	88.712	63	103.526	63	73.0644
64	10.295	64	37.4513	64	90.5908	64	88.8959	64	8.768	64	48.6053	64	5.7133	64	42.3059	64	39.919	64	77.806	64	17.056	64	26.1449	64	44.013	64	51.939	64	26.956	64	34.429	64	29.704	64	65.395					64	105.572	64	116.062	64	84.542	64	106.794	64	54.5991
65	11.188	65	33.25	65	101.348	65	72.4825	65	9.508	65	45.2859	65	5.3029	65	41.1456	65	38.568	65	76.467	65	17.2245	65	25.7755	65	42.785	65	54.111	65	27.074	65	35.956	65	32.521	65	63.324					65	96.7498	65	111.413	65	95.213	65	104.621	65	33.5191
66	12.241	66	33.6633	66	99.5854	66	64.8191	66	9.548	66	40.1815	66	5.9347	66	40.4786	66	34.485	66	73.053	66	16.4332	66	26.5668	66	44.573	66	58.823	66	27.667	66	38.822	66	34.324	66	59.888					66	71.8927	66	99.5274	66	116.237	66	94.148	66	22.6902
67	10.957	67	36.2744	67	84.0281	67	69.0403	67	9.133	67	36.7562	67	6.6001	67	42.226	67	33.194	67	67.325	67	16.071	67	26.1052	67	52.006	67	65.571	67	26.092	67	42.815	67	36.627	67	56.62					67	45.6936	67	80.4625	67	115.451	67	77.235	67	19.9844
68	10.5	68	41.8462	68	58.3913	68	82.2912	68	9.776	68	35.9763	68	6.4776	68	43.949	68	33.949	68	59.169					68	77.386	68	71.898	68	27.531	68	46.848	68	40.528	68	52.637					68	31.116	68	69.0478	68	103.328	68	59.414	68	19.3361
69	11.607	69	48.0224	69	40.9289	69	96.0018	69	9.856	69	36.6382	69	6.5594	69	45.2483	69	28.406	69	49.822					69	108.99	69	77.325	69	28.582	69	54.527	69	43.774	69	52.758					69	24.0822	69	61.8554	69	80.265	69	48.975	69	18.0465
70	11.159	70	53.3806	70	33.9423	70	104.312	70	9.973	70	37.7966	70	5.8107	70	46.2071	70	28.034	70	43.872					70	131.487	70	78.642	70	29.071	70	57.239	70	44.777	70	50.274					70	20.6169	70	59.9555	70	59.273	70	42.846	70	16.3293
71	10.573	71	58.4183	71	30.4966	71	107.738	71	10.443	71	39.5445	71	5.7258	71	45.4117	71	23.495	71	41.228					71	135.512	71	81.291	71	29.887	71	57.065	71	51.643	71	46.973					71	16.937	71	60.9656	71	42.036	71	41.024	71	16.9555
72	12.694	72	60.6025	72	28.5015	72	106.548	72	11.367	72	39.1049	72	5.6115	72	43.2176	72	24.417	72	43.296					72	115.419	72	80.941	72	28.776	72	57.268	72	71.709	72	42.101					72	14.349	72	59.788	72	36.206	72	44.788
73	11.917	73	59.2001	73	27.0084	73	104.332	73	13.065	73	38.8724	73	6.2337	73	40.9745	73	25.069	73	46.636					73	96.142	73	81.104	73	31.21	73	53.412	73	93.59	73	38.975					73	12.9585	73	57.7767	73	33.924	73	47.227
74	12.312	74	59.0435	74	24.7068	74	103.96	74	10.28	74	37.3433	74	6.7582	74	38.641	74	25.799	74	50.354					74	77.233	74	82.69	74	31.432	74	48.913	74	123.427	74	36.754					74	14.3576	74	51.2349	74	35.036	74	48.107
75	12.981	75	58.8464	75	24.1134	75	101.08	75	10.952	75	36.0158	75	6.4951	75	38.2875	75	21.439	75	50.119					75	70.698	75	81.727	75	31.076	75	42.616	75	132.122	75	37.048					75	13.2098	75	47.5826	75	33.59	75	49.108
76	12.801	76	54.7716	76	23.863	76	94.9475	76	10.141	76	33.7978	76	6.1974	76	41.0613	76	22.102	76	46.181					76	67.396	76	78.133	76	34.861	76	37.606	76	120.175	76	43.271					76	11.8274	76	48.8003	76	36.088	76	48.003
77	15.095	77	47.9302	77	20.951	77	87.3091	77	10.482	77	32.9422	77	6.1837	77	47.486									77	65.036	77	70.851	77	31.633	77	33.914	77	93.066	77	49.415					77	10.9425	77	45.3221	77	36.751	77	41.966
78	15.824	78	40.222	78	18.681	78	79.3159	78	9.063	78	32.1019	78	7.5968	78	51.788									78	66.414	78	64.673	78	35.082	78	32.363	78	64.938	78	53.375					78	10.5604	78	41.9433
79	19.368	79	39.5394	79	17.7724	79	71.0288	79	11.697	79	32.3371	79	8.1204	79	55.323									79	67.546	79	59.211	79	39.928	79	29.434	79	54.659	79	55.91					79	10.7297	79	35.3104
80	20.43	80	39.6767	80	17.7781	80	68.0397	80	13.784	80	34.4903	80	8.1769	80	55.2988									80	69.345	80	59.454	80	44.777	80	27.512	80	49.872	80	57.406					80	10.7275	80	38.0867
81	22.214	81	45.6117	81	16.6163	81	73.8101	81	15.283	81	36.3819	81	8.2544	81	52.0004									81	86.346	81	62.515	81	50.397	81	26.432	81	45.847	81	54.265					81	10.5939	81	34.6506
82	20.093	82	57.4156	82	14.0955	82	82.351	82	13.774	82	38.9245	82	9.7601	82	48.8606									82	112.332	82	64.784	82	61.916	82	26.397	82	61.752	82	51.283					82	9.2105	82	35.6477
83	22.447	83	67.924					83	16.292	83	43.04	83	10.8201	83	50.2929									83	122.719	83	67.974	83	76.947	83	27.6	83	98.609	83	47.054					83	8.3978	83	40.3595
84	24.153	84	74.4438					84	17.817	84	45.6176	84	13.1114	84	53.5667									84	117.118	84	65.863	84	98.623	84	29.874	84	132.949	84	41.06					84	8.1916	84	43.5081
85	27.567	85	76.6683					85	17.875	85	48.3221	85	14.4335	85	58.3313									85	91.642	85	63.676	85	99.913	85	33.328	85	146.086	85	39.781					85	9.3034	85	47.7412
86	33.693	86	67.9453					86	16.098	86	49.5869	86	15.3614	86	64.5578									86	67.69	86	60.324	86	119.979	86	41.927	86	138.602	86	41.937					86	9.7832	86	49.571
87	37.255	87	59.6945					87	16.477	87	48.7878	87	19.3768	87	69.0461									87	57.089	87	56.91	87	172.145	87	50.671	87	114.231	87	46.175					87	8.9835	87	45.1847
88	35.819	88	52.5179					88	14.12	88	48.9705	88	25.283	88	74.9625									88	50.608	88	52.09	88	215.569	88	62.32	88	87.246	88	52.011					88	7.4604	88	41.909
89	33.175	89	47.5681					89	12.14	89	50.2224	89	31.4245	89	82.4293									89	44.552	89	47.438	89	244.313	89	76.215	89	82.147	89	53.765					89	8.7837	89	39.4145
90	26.353	90	43.7938					90	12.898	90	50.3523	90	35.679	90	83.8134									90	39.806	90	45.227	90	220.357	90	85.673	90	80.606	90	54.677					90	8.6135	90	35.736
91	23.113	91	40.5574					91	12.695	91	50.3048	91	39.0715	91	86.1284									91	34.452	91	40.422	91	184.872	91	90.589	91	86.894	91	57.027					91	7.4513	91	33.8871
92	19.77	92	36.9181					92	13.1	92	49.8415	92	50.125	92	88.8588									92	32.752	92	39.142	92	133.107	92	92.975	92	92.631	92	58.884
93	19.425	93	34.9471					93	13.264	93	46.4746	93	67.2516	93	90.4776									93	30.775	93	38.645	93	100.935	93	90.548	93	117.64	93	60.227
94	18.16	94	32.58					94	10.174	94	44.4501	94	75.6448	94	93.0488									94	26.845	94	37.426	94	94.772	94	82.945	94	137.923	94	61.423
95	18.42	95	34.13					95	10.155	95	45.1779	95	71.0789	95	92.4625													95	91.875	95	71.895	95	148.768	95	57.962
96	23.26	96	39.97					96	9.633	96	47.3223	96	55.3856	96	89.8038													96	102.887	96	64.779	96	131.284	96	56.674
97	29.26	97	44.84					97	12.173	97	50.7052	97	39.3556	97	82.8112													97	101.21	97	67.403	97	102.678	97	56.806
98	35.26	98	48.13					98	8.875	98	48.7981	98	28.5858	98	77.8853													98	94.242	98	68.888	98	69.857	98	61.003
99	35.58	99	51.84					99	8.504	99	47.0824	99	27.3037	99	74.1249													99	87.83	99	76.687	99	46.172	99	69.378
100	31.45	100	51.58					100	10.583	100	47.3018	100	24.3842	100	74.1893													100	93.849	100	79.901	100	33.482	100	64.515
101	35.68	101	50.29					101	11.669	101	47.3979	101	23.1681	101	75.5199													101	111.744	101	78.578	101	27.172	101	58.309
102	40.13	102	50					102	12.892	102	51.6243	102	22.1546	102	75.5972													102	111.634	102	76.254	102	21.006	102	50.075
103	53.78	103	50.71					103	10.935	103	57.4875	103	19.9032	103	73.9907													103	101.793	103	71.244	103	18.244	103	43.996
104	65.39	104	51					104	11.711	104	60.9716	104	17.9937	104	72.9099													104	87.657	104	65.008	104	15.436	104	42.831
105	63.03	105	53.84					105	11.945	105	61.7959	105	16.9223	105	69.6814													105	66.941	105	57.393	105	14.812	105	49.651
106	51.77	106	53.58					106	10.605	106	59.2791	106	15.4473	106	67.4336													106	55.799	106	51.725	106	13.538	106	59.986
107	40.19	107	53					107	13.936	107	56.5553	107	14.909	107	66.0911													107	49.614	107	48.896	107	12.989	107	64.753
108	42.946	108	53.9133					108	13.317	108	53.0255	108	13.2227	108	66.2462													108	43.889	108	45.439	108	13.466	108	66.803
109	44.784	109	57.107					109	13.969	109	50.7692	109	11.7013	109	71.1738													109	41.392	109	43.459	109	12.354	109	68.515
110	49.449	110	61.192					110	11.59	110	50.1087	110	10.9665	110	75.1836													110	41.452	110	42.726	110	11.16	110	64.211
111	55.683	111	65.4624					111	12.306	111	48.2735	111	9.2449	111	77.9575													111	35.621	111	43.868	111	11	111	58.516
112	69.088	112	68.4996					112	11.728	112	45.6702	112	9.1622	112	74.6215													112	33.183	112	49.338	112	10.45	112	49.085
113	91.628	113	71.1102					113	13.127	113	41.4936	113	8.8338	113	68.235													113	36.541	113	55.848	113	10.164	113	39.69
114	112.114	114	69.0685					114	13.258	114	39.1037	114	7.9152	114	58.8116													114	33.057	114	62.806	114	9.91	114	28.259
115	114.598	115	65.7612					115	13.97	115	39.65	115	6.1628	115	53.4416													115	30.229	115	64.866	115	9.789	115	20.803
116	97.993	116	67.3241					116	14.439	116	42.9723	116	6.6652	116	50.7543													116	26.06	116	62.718	116	10.019	116	18.151
117	72.421	117	71.5316					117	15.037	117	47.63	117	6.0595	117	50.3846													117	30.318	117	57.15	117	10	117	19.293
118	52.218	118	79.3113					118	16.047	118	50.8969																					118	9.363	118	19.84
119	40.161	119	84.6387					119	15.711	119	52.586																					119	8.893	119	20.47
120	36.011	120	89.8588					120	17.048	120	56.1408																					120	10.004	120	21.924
121	32.869	121	89.0898					121	24.184	121	57.8546																					121	10.641	121	26.303
122	28.101	122	83.2825					122	35.077	122	57.4416																					122	9.011	122	27.944
123	20.84	123	74.2207					123	58.441	123	58.8683																					123	9.366	123	31.572
124	15.726	124	63.6436					124	92.06	124	64.8231																					124	7.926	124	30.956
125	14.118	125	56.3434					125	118.775	125	70.8999																					125	7.837	125	29.621
126	14.12	126	50.2685					126	122.836	126	80.1189																					126	8.042	126	27.483
127	12.728	127	46.7125					127	115.783	127	89.8267																					127	8.053	127	25.767
128	11.507	128	47.2781					128	110.933	128	92.956																					128	8.05	128	25.204
129	11.764	129	46.86					129	85.705	129	99.8084																					129	7.125	129	22.123
130	10.334	130	48.1473					130	53.674	130	99.1809																					130	7.551	130	21.078
131	11.76	131	47.2149					131	37.68	131	97.2879																					131	6.975	131	21.448
132	11.347	132	48.2608					132	37.75	132	96.9151																					132	6.701	132	21.876
133	9.884	133	49.4473					133	37.569	133	96.7563																					133	7.416	133	22.136
134	9.481	134	50.6329					134	44.111	134	101.835																					134	8.347	134	24.546
135	9.243	135	51.2032					135	47.477	135	107.939																					135	6.961	135	24.639
136	9.419	136	51.7689					136	48.596	136	106.409																					136	7.412	136	24.46
								137	43.815	137	103.651																					137	6.829	137	22.666
								138	41.24	138	96.2712																					138	5.603	138	21.418
								139	40.585	139	90.0524
								140	37.749	140	89.3162
								141	33.937	141	91.9988
								142	31.961	142	100.424
								143	33.687	143	105.983
								144	33.659	144	104.999
								145	31.205	145	96.9274
								146	25.175	146	82.6285
								147	24.672	147	68.1339
								148	25.515	148	57.6704
								149	23.743	149	50.5027
								150	24.673	150	45.441
								151	30.239	151	46.795
								152	33.47	152	51.0259
								153	34.11	153	52.8063
								154	42.503	154	50.2136
[truncated: 74 more columns]

## Sheet: Binned
7	2	FISH	IF	5	FISH	IF	7	FISH	IF	12	FISH	IF	14	FISH	IF	18	FISH	IF	21	FISH	IF	26	FISH	IF	6	FISH	IF	7	FISH	IF	8	FISH	IF	13	FISH	IF	15	FISH	IF	16	FISH	IF	36	FISH	IF	38	FISH	IF	40
X	X	Y	Y	X	Y	Y	X	Y	Y	X	Y	Y	X	Y	Y	X	Y	Y	X	Y	Y	X	Y	Y	X	Y	Y	X	Y	Y	X	Y	Y	X	Y	Y	X	Y	Y	X	Y	Y	X	Y	Y	X	Y	Y	X
0	0	10	120	0	15	82	0	8	145	0	7	77	0	18	168	0	22	106	0	15	123	0	22	199	0	7	133	0	16	115	0	10	124	0	12	158	0	6	140	0	6	102	0	23	171	0	17	149	0
1	0.735294	9.984	113.91	1.21951	16.899	82.2332	0.649351	11	147	0.854701	6.8242	82.8892	1.31579	18.698	169.227	1.49254	21.2705	103.262	1.06383	13.83	132.704	0.854701	18.353	202.574	0.724638	6.51	138.179	1.63934	15.402	119.322	1.0989	8.3787	122	1.2987	10.128	147.535	1.40845	6.4238	139.329	1.03093	6.958	106.623	1.35135	23.414	169.172	1.40845	16.938	149.071	1.69492
2	1.47059	8.865	116.297	2.43902	14.0031	82.5995	1.2987	7	153	1.7094	9.2764	89.4755	2.63158	17.492	163.678	2.98507	20.8311	93.4974	2.12766	13.841	139.962	1.7094	21.426	198.926	1.44928	7.267	143.919	3.27869	17.677	116.241	2.1978	7.9289	123.498	2.5974	11.948	133.31	2.8169	7.813	133.401	2.06186	7.526	105.92	2.7027	21.828	176.243	2.8169	15.975	140.526	3.38983
3	2.20588	8.103	119.964	3.65854	14.7988	92.8834	1.94805	9	153	2.5641	11.6498	99.8274	3.94737	18.677	148.239	4.47761	19.958	76.7333	3.19149	15.406	142.233	2.5641	21.957	187.115	2.17391	6.488	139.664	4.91803	15.352	110.445	3.2967	8.6655	119.588	3.8961	10.32	113.072	4.22535	8.2477	122.181	3.09278	6.356	101.557	4.05405	19.713	190.419	4.22535	16.157	122.877	5.08475
4	2.94118	8.421	124.619	4.87805	14.2676	92.3349	2.5974	10	154	3.4188	10.9499	108.347	5.26316	19.185	130.408	5.97015	19.9398	61.9694	4.25532	15.062	141.762	3.4188	18.868	168.471	2.89855	6.896	129.936	6.55738	15.202	91.6283	4.3956	7.8873	106.118	5.19481	10.211	101.371	5.6338	7.0241	104.55	4.12371	7.589	91.5065	5.40541	23.284	199.892	5.6338	14.408	104.916	6.77966
5	3.67647	8.73	129.127	6.09756	12.5048	88.5099	3.24675	11	158	4.2735	8.6016	100.503	6.57895	20.171	115.575	7.46269	19.6242	48.2895	5.31915	14.877	137.617	4.2735	21.217	142.715	3.62319	7.433	115.25	8.19672	15.078	74.779	5.49451	7.7513	87.5456	6.49351	11.885	93.037	7.04225	5.7628	87.827	5.15464	7.119	77.3894	6.75676	28.685	204.995	7.04225	14.748	95.212	8.47458
6	4.41176	8.347	124.379	7.31707	12.5997	87.0053	3.8961	12	141	5.12821	7.4959	90.1215	7.89474	23.727	104.099	8.95522	19.8964	38.4257	6.38298	15.277	125.461	5.12821	20.869	117.672	4.34783	7.54	97.17	9.83607	14.903	66.4502	6.59341	8.2498	70.2872	7.79221	10.663	88.501	8.4507	5.4983	78.682	6.18557	6.253	62.981	8.10811	35.265	194.154	8.4507	15.553	92.7222	10.1695
7	5.14706	8.384	114.045	8.53659	13.9949	85.7047	4.54545	9	132	5.98291	6.4118	77.1154	9.21053	23.198	95.596	10.4478	19.1671	32.4237	7.44681	15.106	111.759	5.98291	22.018	93.64	5.07246	8.88	77.585	11.4754	13.347	61.6437	7.69231	6.2914	57.6684	9.09091	10.499	88.507	9.85915	7.1503	72.634	7.21649	5.321	51.1983	9.45946	37.334	168.919	9.85915	17.674	97.5824	11.8644
8	5.88235	6.891	98.5826	9.7561	11.8093	84.2733	5.19481	10.374	110.557	6.83761	5.7215	63.1332	10.5263	25.763	84.996	11.9403	18.6057	31.2705	8.51064	12.256	98.563	6.83761	23.493	79.023	5.7971	8.082	61.853	13.1148	12.724	58.7382	8.79121	6.6569	49.3238	10.3896	9.411	85.323	11.2676	7.0077	68.084	8.24742	5.202	42.0979	10.8108	36.435	144.795	11.2676	18.24	99.3073	13.5593
9	6.61765	7.095	81.2297	10.9756	12.8945	88.0815	5.84416	9.74	92.0049	7.69231	4.8259	53.9028	11.8421	32.452	78.358	13.4328	18.6333	29.6896	9.57447	13.661	85.347	7.69231	21.844	72.507	6.52174	8.003	59.997	14.7541	13.8	58.5582	9.89011	7.6945	48.5477	11.6883	8.177	77.745	12.6761	7	66.986	9.27835	5.364	38.3867	12.1622	31.261	125.564	12.6761	18.494	94.1562	15.2542
10	7.35294	7	70.9217	12.1951	13.9944	91.9778	6.49351	12.15	74.0617	8.54701	4.9953	48.1065	13.1579	34.763	74.474	14.9254	19	28.5915	10.6383	14.362	80.319	8.54701	21.173	68.718	7.24638	8.627	59.184	16.3934	14.25	60.0994	10.989	6.9441	53.2082	12.987	9.35	70.339	14.0845	6.7644	63.87	10.3093	5.947	37.3907	13.5135	24.062	116.42	14.0845	19.876	84.8015	16.9492
11	8.08824	7.644	66.7364	13.4146	14.6297	96.1422	7.14286	10.404	57.097	9.40171	5	41.2966	14.4737	35.301	75.274	16.4179	19.5234	27.9632	11.7021	13.484	74.855	9.40171	20.501	62.271	7.97101	8.73	61.193	18.0328	13.573	62.0264	12.0879	8.0385	54.729	14.2857	8.913	59.56	15.493	7.7512	64.055	11.3402	6.599	38.1258	14.8649	19.203	108.229	15.493	22.837	70.6699	18.6441
12	8.82353	7.947	64.5581	14.6341	17.578	92.822	7.79221	10.637	50.2451	10.2564	4.0464	40.0515	15.7895	36.629	77.57	17.9104	20.1055	27.5583	12.766	13.927	71.148	10.2564	20.749	54.67	8.69565	9.65	64.78	19.6721	14.701	63.9152	13.1868	7.7511	54.9714	15.5844	9.968	49.245	16.9014	6.968	61.184	12.3711	6.552	40.6823	16.2162	21.094	107.563	16.9014	20.086	60.0988	20.339
13	9.55882	6.709	65.3729	15.8537	19.4534	88.5653	8.44156	10.901	49.8377	11.1111	4	35.6579	17.1053	31.382	83.727	19.403	20.0812	29.3191	13.8298	14.631	67.31	11.1111	24.213	48.94	9.42029	9.372	66.865	21.3115	13.755	61.6834	14.2857	8.4598	56.926	16.8831	8.831	41.896	18.3099	6.8449	59.87	13.4021	6.477	44.9363	17.5676	21.712	106.824	18.3099	19.806	57.3984	22.0339
14	10.2941	6.462	63.5834	17.0732	18.4096	81.7193	9.09091	10.866	53.7808	11.9658	4.218	34.236	18.4211	32.346	79.454	20.8955	18.7865	30.0642	14.8936	14.475	61.999	11.9658	22.227	44.885	10.1449	9.113	64.138	22.9508	14.731	61.3567	15.3846	7.1106	55.3818	18.1818	9.313	38.659	19.7183	6.4024	56.282	14.433	6.996	50.6881	18.9189	18.289	99.442	19.7183	20.258	55.7336	23.7288
15	11.0294	7.112	60.4442	18.2927	16.0203	80.0136	9.74026	10.034	53.3589	12.8205	3.7186	34.9341	19.7368	28.371	74.309	22.3881	18.0569	32.4044	15.9574	15.871	59.893	12.8205	18.43	41.781	10.8696	9.734	64.317	24.5902	16.477	54.611	16.4835	6.632	62.5179	19.4805	7.736	39.217	21.1268	7.1044	50.061	15.4639	7.082	53.9565	20.2703	17.887	97.017	21.1268	21.667	59.7174	25.4237
16	11.7647	7.677	58.0351	19.5122	15.075	80.2652	10.3896	9.331	50.2857	13.6752	4.5318	32.9616	21.0526	24.998	65.834	23.8806	17.3657	35.2313	17.0213	16.01	58.501	13.6752	16.684	40.037	11.5942	9.017	57.01	26.2295	19.171	49.9788	17.5824	7.06	64.35	20.7792	7.955	42.433	22.5352	8.2391	44.122	16.4948	6.208	55.2464	21.6216	16.796	96.511	22.5352	20.158	64.254	27.1186
17	12.5	6.948	53.2118	20.7317	15.6937	84.5588	11.039	7.453	43.3289	14.5299	4.0333	32.5267	22.3684	26.898	58.508	25.3731	18.3019	37.6355	18.0851	14.55	60.545	14.5299	23.245	39.652	12.3188	9.653	53.16	27.8689	17.946	48.6548	18.6813	8	56.17	22.0779	9.048	43.02	23.9437	7.285	40.393	17.5258	5.415	57.2128	22.973	18.253	97.16	23.9437	19.414	63.8813	28.8136
18	13.2353	5.727	49.6188	21.9512	14.8106	84.402	11.6883	10.299	38.3526	15.3846	3.6112	30.7214	23.6842	25.566	56.909	26.8657	18.0498	41	19.1489	14.468	63.474	15.3846	21.501	42.094	13.0435	8.289	51.118	29.5082	18.774	48.77	19.7802	7.47	46.23	23.3766	10.103	42.418	25.3521	6.3246	42.053	18.5567	5.931	54.6106	24.3243	15.64	90.933	25.3521	20.278	62.1305	30.5085
19	13.9706	6.166	46.9677	23.1707	12.6551	82.4864	12.3377	11.724	33.8169	16.2393	3.9757	29.7435	25	23.982	60.384	28.3582	17.1476	41	20.2128	15.224	66.083	16.2393	21.225	46.812	13.7681	9.083	51.838	31.1475	20.389	53.7715	20.8791	7.53	43.06	24.6753	9.019	44.097	26.7606	7.1115	46.631	19.5876	5.567	49.6302	25.6757	16.055	87.274	26.7606	20.648	58.5928	32.2034
20	14.7059	6.951	41.8674	24.3902	11.6774	78.3792	12.987	10.694	30.5079	17.094	4.4758	31.6031	26.3158	24.415	61.89	29.8507	17.9566	42.3361	21.2766	16.689	69.591	17.094	21.778	51.125	14.4928	9.694	51.787	32.7869	20.108	59.203	21.978	8	39.23	25.974	10.654	47.03	28.169	6.6227	52.016	20.6186	5.96	45.1126	27.027	16.765	82.027	28.169	20.22	55.4845	33.8983
21	15.4412	6.675	39.7089	25.6098	11.9965	73.0606	13.6364	9.539	32.2613	17.9487	3.9145	34.4603	27.6316	25.885	65.047	31.3433	18.3628	42.0879	22.3404	15.712	73.095	17.9487	27.383	53.996	15.2174	8.265	48.91	34.4262	21.072	63.1184	23.0769	8	33.94	27.2727	10.028	49.503	29.5775	6.948	54.3	21.6495	6.149	38.6301	28.3784	17.969	77.64	29.5775	18.672	50.8049	35.5932
22	16.1765	6.042	40.0246	26.8293	11.7362	70.957	14.2857	8.794	37.0119	18.8034	3.9944	35.9036	28.9474	23.59	65.638	32.8358	18.9814	41.0142	23.4043	16.807	78.128	18.8034	27.831	54.211	15.942	7.976	47.734	36.0656	22.439	67.4893	24.1758	8	32.47	28.5714	12.956	47.696	30.9859	6.2692	54.247	22.6804	7.249	35.1495	29.7297	18.379	78.789	30.9859	20.631	52.6158	37.2881
23	16.9118	7.255	42.7224	28.0488	14.433	68.8597	14.9351	12.544	42.145	19.6581	4.0374	35.1106	30.2632	23.346	64.886	34.3284	19.6716	39.3064	24.4681	17.52	81.008	19.6581	22.11	52.974	16.6667	9.552	43.772	37.7049	25.029	70.5233	25.2747	8	33.06	29.8701	12.15	44.708	32.3944	6.9722	51.908	23.7113	6.627	31.1261	31.0811	21.455	81.414	32.3944	21.191	59.1528	38.9831
24	17.6471	6.752	47.9036	29.2683	12.2298	69.1956	15.5844	10.666	45.6264	20.5128	4.8282	34.0038	31.5789	23.116	64.668	35.8209	18.7357	36.9352	25.5319	18.358	80.414	20.5128	24.185	49.922	17.3913	9.377	43.591	39.3443	25.671	69.5194	26.3736	9.06	35.59	31.1688	13.722	39.642	33.8028	7.8218	49.44	24.7423	7.782	29.9014	32.4324	21.408	85.732	33.8028	21.885	73.6625	40.678
25	18.3824	6.94	49.2837	30.4878	13.3153	63.9092	16.2338	9.295	46.7623	21.3675	4.2559	31.8179	32.8947	23.253	64.756	37.3134	19.4639	36.0167	26.5957	17.911	76.398	21.3675	25.166	46.844	18.1159	8.686	48.903	40.9836	27.911	68.7678	27.4725	8.41	37.53	32.4675	14.405	34.982	35.2113	7.6163	50.358	25.7732	9.206	31.4668	33.7838	20.348	90.745	35.2113	24.783	94.2213	42.3729
26	19.1176	5.856	48.6055	31.7073	12.4168	60.7776	16.8831	10.045	45.5412	22.2222	4.2852	28.0886	34.2105	21.23	67.699	38.806	19.929	34.8049	27.6596	16.932	70.827	22.2222	25.959	45.006	18.8406	10.256	51.805	42.623	32.014	75.2235	28.5714	9.12	40.12	33.7662	15.525	30.506	36.6197	7.5898	55.38	26.8041	6.682	30.6585	35.1351	20.488	96.62	36.6197	27.487	101.014	44.0678
27	19.8529	7.17	45.0872	32.9268	12.1035	55.0869	17.5325	10.272	42.5752	23.0769	4.3731	26.17	35.5263	23.729	68.238	40.2985	20.2089	33.7856	28.7234	16.96	67.174	23.0769	23.611	42.447	19.5652	8.909	53.688	44.2623	37.643	86.393	29.6703	9.94	42.53	35.0649	14.788	28.5	38.0282	9.2729	61.664	27.8351	7.311	30.5503	36.4865	19.762	104.623	38.0282	28.56	104.412	45.7627
28	20.5882	7.296	41.3334	34.1463	12.0672	51.1945	18.1818	10.018	38.1939	23.9316	4.461	25.1084	36.8421	25.782	67.918	41.791	20.8961	33.6682	29.7872	17.121	63.793	23.9316	20.1	38.485	20.2899	10.412	51.734	45.9016	47.631	106.74	30.7692	9	41.94	36.3636	17.015	27.946	39.4366	10.4992	63.78	28.866	7.037	35.1453	37.8378	21.146	111.574	39.4366	28.59	93.1869	47.4576
29	21.3235	7	39.8265	35.3659	12.0672	54.97	18.8312	10.708	33.9513	24.7863	4.0616	28.5511	38.1579	26.023	69.431	43.2836	19.2047	33.2971	30.8511	17.465	64.764	24.7863	19.977	37.697	21.0145	11	46.332	47.541	64.721	121.633	31.8681	8.47	41	37.6623	20.108	29.115	40.8451	10.3348	67.078	29.8969	7.334	35.2225	39.1892	22.316	115.507	40.8451	29.774	79.6805	49.1525
30	22.0588	6.73	39.5935	36.5854	13.9667	58.9339	19.4805	11.849	31.8496	25.641	4.8839	30.4468	39.4737	25.617	72.127	44.7761	20.677	34.0732	31.9149	16.483	68.941	25.641	20.167	36.012	21.7391	10.868	43.899	49.1803	85.051	132.732	32.967	8.53	43.65	38.961	17.719	33.103	42.2535	10.1431	66.485	30.9278	6.201	36.4191	40.5405	26.071	114.282	42.2535	32.621	73.4542	50.8475
31	22.7941	7.78	40.9208	37.8049	12.095	64.7009	20.1299	13.19	29.7501	26.4957	3.8777	34.2448	40.7895	25.417	75.998	46.2687	19.7295	36.0241	32.9787	15.679	73.203	26.4957	21.034	36.511	22.4638	9.702	40.154	50.8197	96.922	125.894	34.0659	10.59	44.41	40.2597	18.92	38.804	43.662	10.4325	64.446	31.9588	5.499	39.1772	41.8919	27.421	114.071	43.662	32.022	76.1118	52.5424
32	23.5294	7.418	40.8713	39.0244	13.3463	66.7059	20.7792	13.036	31.7822	27.3504	3.8126	37.4411	42.1053	26.817	76.271	47.7612	19.5339	37.64	34.0426	16.259	76.62	27.3504	22.512	36.739	23.1884	11.072	44.119	52.459	91.094	118.687	35.1648	10.41	44.06	41.5584	16.448	42.521	45.0704	9.9797	64.535	32.9897	5.787	45.4669	43.2432	28.964	111.315	45.0704	35.218	88.8582	54.2373
33	24.2647	6.675	40.3276	40.2439	13.2159	63.5455	21.4286	13.234	31.3366	28.2051	3.9005	39.4715	43.4211	29.52	74.973	49.2537	21.0831	40.3767	35.1064	16.644	80.79	28.2051	24.624	38.252	23.913	11.828	53.367	54.0984	86.154	94.6162	36.2637	10.59	43.41	42.8571	16.015	45.588	46.4789	10.9782	67.584	34.0206	6.293	53.706	44.5946	28.653	109.656	46.4789	36.14	106.038	55.9322
34	25	6.31	39.8579	41.4634	12.1848	64.4004	22.0779	14.58	32.377	29.0598	3.1301	39.9551	44.7368	32.128	75.803	50.7463	22.2224	41.9328	36.1702	17.373	85.002	29.0598	22.965	38.542	24.6377	11.953	56.977	55.7377	73.89	81.0245	37.3626	12	43.59	44.1558	15.964	46.927	47.8873	10.1963	73.733	35.0515	6.334	60.364	45.9459	33.275	106.662	47.8873	37.87	111.919	57.6271
35	25.7353	7.427	40.037	42.6829	13.42	63.2645	22.7273	16.388	32.8602	29.9145	3.0639	38.2119	46.0526	33.368	75.697	52.2388	21.0197	42.3072	37.234	17.996	85.979	29.9145	21.317	41.959	25.3623	12.038	57.078	57.377	60.682	69.7714	38.4615	12	45	45.4545	14.678	44.074	49.2958	9.4611	79.564	36.0825	5.449	64.0871	47.2973	35.191	98.487	49.2958	40.388	101.837	59.322
36	26.4706	7.231	39.3517	43.9024	13.8677	65.2438	23.3766	15.419	31.1785	30.7692	4.3592	37.4997	47.3684	36.052	73.991	53.7313	21.3676	42.1565	38.2979	19.192	84.144	30.7692	23.375	48.324	26.087	12.387	49.746	59.0164	61.175	60.2352	39.5604	12	45	46.7532	14.996	42.954	50.7042	9.5455	84.697	37.1134	5.166	66.2841	48.6486	35.684	89.719	50.7042	40.979	92.9302	61.0169
37	27.2059	7.24	39.7602	45.122	12.5319	71.6778	24.026	14.769	27.2633	31.6239	3.6479	36.2141	48.6842	43.221	70.22	55.2239	21.3186	42.2804	39.3617	18.185	79.896	31.6239	24.907	54.464	26.8116	12.675	43.276	60.6557	77.722	58.9733	40.6593	13.59	45.53	48.0519	16.686	44.463	52.1127	10.3314	85.798	38.1443	6.395	71.263	50	39.658	86.323	52.1127	45.033	80.3548	62.7119
38	27.9412	8.413	38.5874	46.3415	13.298	78.0021	24.6753	13.834	23.4555	32.4786	4.0378	34.9205	50	45.799	65.731	56.7164	21.4123	40.5208	40.4255	19.11	75.76	32.4786	23.947	62.685	27.5362	11.711	35.949	62.2951	103.859	58.9652	41.7582	16.06	48.65	49.3506	14.91	48.748	53.5211	12.3596	82.419	39.1753	7.382	81.7096	51.3514	42.961	86.68	53.5211	40.858	78.2795	64.4068
39	28.6765	7.918	38.0661	47.561	13.6959	87.4545	25.3247	13.571	20.9807	33.3333	4.8696	33.1053	51.3158	44.874	60.592	58.209	22.6921	39.6539	41.4894	18.271	72.034	33.3333	24.663	68.946	28.2609	13.154	34.88	63.9344	124.129	56.3779	42.8571	15.94	48.35	50.6494	16.111	54.819	54.9296	12.5856	74.227	40.2062	7.303	95.4944	52.7027	46.25	90.716	54.9296	41.591	82.1329	66.1017
40	29.4118	8.459	39.2627	48.7805	12.7601	94.3024	25.974	13.858	20.2601	34.188	4.6025	31.9052	52.6316	44.527	61.561	59.7015	28.7932	38.1614	42.5532	18.864	69.017	34.188	24.414	68.05	28.9855	13.282	39.499	65.5738	121.117	53.825	43.956	14.47	43.88	51.9481	14.678	59.169	56.338	11.4721	63.766	41.2371	7.305	108.182	54.0541	48.035	94.285	56.338	41.76	86.2314	67.7966
41	30.1471	7.35	39.1064	50	13.5893	98.7342	26.6234	13.756	20.9181	35.0427	4.0864	30.5929	53.9474	49.144	63.382	61.194	38.5764	37.8364	43.617	18.623	69.245	35.0427	23.984	65.629	29.7101	13.383	45.078	67.2131	113.908	57.6859	45.0549	12.9616	42.3794	53.2468	14.993	59.329	57.7465	10.4858	58.36	42.268	8	113.788	55.4054	55.662	99.825	57.7465	44.725	90.8296	69.4915
42	30.8824	7.132	38.0755	51.2195	14.0556	99.6904	27.2727	11.482	23.7006	35.8974	4.8438	31.2958	55.2632	49.06	68.662	62.6866	48.9446	35.3555	44.6809	18.9	68.785	35.8974	26.634	63.525	30.4348	14.546	51.298	68.8525	113.285	67.7739	46.1538	12.6841	46.133	54.5455	15.987	55.809	59.1549	11.092	58.291	43.299	8.095	110.254	56.7568	62.246	105.087	59.1549	47.922	97.3809	71.1864
43	31.6176	7.792	37.7278	52.439	15.1655	95.5957	27.9221	12.642	26.1396	36.7521	5.2663	34.1469	56.5789	50.424	75.47	64.1791	53.844	32.7853	45.7447	19.653	67.668	36.7521	19.91	63.071	31.1594	15.286	53.542	70.4918	103.793	81.1767	47.2527	13.0806	54.3676	55.8442	15.82	54.977	60.5634	13.1113	64.017	44.3299	8.956	97.8437	58.1081	64.547	112.071	60.5634	50.071	108.881	72.8814
44	32.3529	7.962	38.4819	53.6585	15.6234	92.9725	28.5714	11.526	28.2597	37.6068	4.2348	39.3821	57.8947	58.949	80.477	65.6716	52.5484	30.0636	46.8085	19.276	65.761	37.6068	19.377	62.267	31.8841	15.472	53.166	72.1311	81.356	88.544	48.3516	12.8129	59.4006	57.1429	17.997	58.425	61.9718	13.6497	74.71	45.3608	8.331	77.402	59.4595	64.888	114.184	61.9718	55.582	117.797	74.5763
45	33.0882	8.274	43.6567	54.878	15.2051	94.003	29.2208	10.774	29.6805	38.4615	4.1916	40.7815	59.2105	68.319	83.31	67.1642	46.3579	29.6748	47.8723	19.124	63.27	38.4615	22.714	62.572	32.6087	17.338	50.268	73.7705	66.588	87.4094	49.4505	13.2694	61.0483	58.4416	20.559	63.974	63.3803	16.2242	85.119	46.3918	8.14	55.9097	60.8108	76.996	110.743	63.3803	67.755	124.658	76.2712
46	33.8235	8.199	52.6032	56.0976	14.0542	93.9071	29.8701	11.95	29.3774	39.3162	4.4743	41.5773	60.5263	71.025	81.983	68.6567	37.5462	30.7573	48.9362	19.463	62.1	39.3162	24.38	67.365	33.3333	20.793	45.668	75.4098	59.113	85.4753	50.5495	12.1562	57.337	59.7403	23.268	70.314	64.7887	20.7851	88.102	47.4227	8	40.2787	62.1622	86.297	104.172	64.7887	86.966	119.846	77.9661
47	34.5588	8.315	66.0059	57.3171	14.2024	96.2413	30.5195	10.662	29.1598	40.1709	5	38.9195	61.8421	75.483	79.591	70.1493	31.4615	34.7737	50	20.71	62.357	40.1709	22.898	67.195	34.058	19.437	40.979	77.0492	53.095	78.7935	51.6484	12.3744	54.2708	61.039	26.559	80.222	66.1972	24.4298	81.861	48.4536	8.358	31.7782	63.5135	87.81	95.8	66.1972	111.166	110.295	79.661
48	35.2941	8.842	75.3911	58.5366	15.8375	100.14	31.1688	12.787	31.6109	41.0256	4.6167	36.1729	63.1579	81.48	78.186	71.6418	28.0671	40.5802	51.0638	21.577	62.584	41.0256	25.693	61.23	34.7826	19.828	40.083	78.6885	48.275	75.7662	52.7473	12.7501	49.2142	62.3377	24.723	82.48	67.6056	26.4515	75.994	49.4845	9.596	29.601	64.8649	88.565	83.982	67.6056	118.908	89.384	81.3559
49	36.0294	8.737	77.6621	59.7561	16.5064	99.9079	31.8182	12	32.0373	41.8803	4.8492	33.1171	64.4737	88.99	75.89	73.1343	25.6999	48.5793	52.1277	22.504	60.731	41.8803	25.925	57.061	35.5072	20.896	43.143	80.3279	44.15	77.3225	53.8462	12.9339	47.5782	63.6364	24.804	79.573	69.0141	34.3278	73.558	50.5155	10.23	30.8417	66.2162	99.859	77.707	69.0141	110.257	78.1802	83.0508
50	36.7647	8.005	72.7507	60.9756	16.8344	95.5255	32.4675	10.577	32.2259	42.735	4.7883	34.0156	65.7895	97.362	74.996	74.6269	24.2954	57.4247	53.1915	22.003	57.028	42.735	27.615	52.922	36.2319	20.666	48.71	81.9672	38.165	85.4239	54.9451	14.3728	45.1131	64.9351	25.071	75.963	70.4225	51.0278	78.223	51.5464	11.689	30.1792	67.5676	115.98	75.651	70.4225	101.408	73.4828	84.7458
51	37.5	8.295	62.6212	62.1951	17.9421	89.1678	33.1169	11.791	30.6798	43.5897	4.8533	37.1159	67.1053	105.639	74.421	76.1194	24.875	64.1783	54.2553	24.223	55.246	43.5897	24.339	53.652	36.9565	20.739	55.469	83.6066	35.415	89.7124	56.044	15.2408	43.1371	66.2338	27.854	70.262	71.831	75.805	90.234	52.5773	11.859	30.3403	68.9189	127.317	93.153	71.831	93.654	76.786	86.4407
52	38.2353	9.619	53.5362	63.4146	18.8978	80.5079	33.7662	13.121	28.7624	44.4444	6.1178	40.2071	68.4211	108.906	78.112	77.6119	28.0827	67.3901	55.3191	25.961	51.926	44.4444	23.932	55.283	37.6812	21.981	62.17	85.2459	37.08	78.6258	57.1429	16.6758	40.3019	67.5325	31.784	63.922	73.2394	92.4354	105.681	53.6082	12.364	30.5127	70.2703	159.298	117.535	73.2394	101.32	89.4658	88.1356
53	38.9706	8.73	48.7032	64.6341	18.536	72.5364	34.4156	14.19	26.945	45.2991	5	42.9792	69.7368	120.634	81.012	79.1045	35.3076	66.0768	56.383	25.684	48.457	45.2991	22.485	58.914	38.4058	22.208	58.226	86.8852	34.002	72.4622	58.2418	16.6381	44.6729	68.8312	29.489	59.07	74.6479	91.3512	115.93	54.6392	14.189	29.1141	71.6216	215.859	143.463	74.6479	122.294	101.827	89.8305
54	39.7059	8.954	47.6702	65.8537	19.1301	67.1638	35.0649	15.257	26.9138	46.1538	5	43.8701	71.0526	118.65	90.084	80.597	45.4882	63.6279	57.4468	28.548	46.245	46.1538	23.463	56.437	39.1304	24.325	50.317	88.5246	31.236	66.4371	59.3407	18.048	43.0457	70.1299	30.966	51.966	76.0563	84.306	117.87	55.6701	16.938	29.7439	72.973	240.104	167.583	76.0563	132.748	113.942	91.5254
55	40.4412	9.289	44.308	67.0732	19.466	64.4554	35.7143	13.234	28.977	47.0085	5.4527	41.2344	72.3684	104.636	93.419	82.0896	53.4998	57.7207	58.5106	30.127	44.313	47.0085	24.642	52.108	39.8551	26.189	42.493	90.1639	28.228	66.7726	60.4396	18.049	44.0078	71.4286	29.899	46.362	77.4648	71.4809	111.466	56.701	17.317	30.3366	74.3243	207.87	181.993	77.4648	129.766	117.58	93.2203
56	41.1765	8.672	41.6586	68.2927	20.2847	62.8884	36.3636	10.513	31.8	47.8632	5.1096	37.4193	73.6842	82.636	95.803	83.5821	51.4886	53.6212	59.5745	31.262	45.273	47.8632	27.348	46.714	40.5797	25.756	36.732	91.8033	22.417	65.253	61.5385	25.6868	44.2848	72.7273	30.499	47.166	78.8732	64.3579	110.586	57.732	19.817	31.3186	75.6757	157.874	179.176	78.8732	103.307	110.375	94.9153
57	41.9118	9.927	39.292	69.5122	22.9314	63.3719	37.013	8.637	37.2447	48.7179	5.6243	36.8345	75	71.758	95.062	85.0746	42.6762	51.1331	60.6383	36.065	47.98	48.7179	27.007	45.805	41.3043	26.6	35.568	93.4426	18.985	69.1266	62.6374	29.3312	45.6061	74.026	30.444	53.319	80.2817	69.1777	121.847	58.7629	22.947	36.7877	77.027	130.868	161.756	80.2817	71.328	100.253	96.6102
58	42.6471	9.501	40.0572	70.7317	24.3108	67.7437	37.6623	11	39.0012	49.5726	4.5646	36.5311	76.3158	62.629	91.923	86.5672	34.848	48.0885	61.7021	45.25	50.575	49.5726	22.996	47.465	42.029	25.472	37.224	95.082	18.089	76.1425	63.7363	30.198	40.7997	75.3247	35.139	59.436	81.6901	83.9608	140.045	59.7938	24.211	44.5218	78.3784	122.428	136.756	81.6901	52.273	88.705	98.3051
59	43.3824	10.909	41.5373	71.9512	27.6329	78.9363	38.3117	10.622	39.9852	50.4274	5.5508	39.8179	77.6316	55.842	85.691	88.0597	24.5007	45.1777	62.766	56.797	53.299	50.4274	19.785	51.017	42.7536	22.723	43.231	96.7213	15.517	76.4762	64.8352	30.2924	46.257	76.6234	42.342	64.751	83.0986	95.0058	150.18	60.8247	25.932	53.444	79.7297	119.377	114.402	83.0986	45.913	76.5954	100
60	44.1176	9.475	45.0085	73.1707	36.0156	92.8283	38.961	10.386	42.1312	51.2821	5.2866	45.2201	78.9474	51.782	78.258	89.5522	21.2007	42.6673	63.8298	65.698	52.332	51.2821	25.699	50.944	43.4783	24.127	54.676	98.3607	14.227	72.1844	65.9341	34.4169	51.9971	77.9221	56.362	70.232	84.507	97.1641	142.992	61.8557	27.657	63.7325	81.0811	102.683	104.526	84.507	41.794	66.2261
61	44.8529	9.287	47.4176	74.3902	45.5615	103.386	39.6104	10.201	43.4874	52.1368	5.4465	47.8353	80.2632	49.371	74.725	91.0448	18.818	36.6629	64.8936	67.568	51.22	52.1368	27.699	47.88	44.2029	26.758	63.032	100	13.956	67.0826	67.033	45.5306	64.8883	79.2208	77.946	81.947	85.9155	98.8723	128.012	62.8866	38.253	68.8099	82.4324	83.335	95.929	85.9155	38.631	65.5661
62	45.5882	10.026	44.9402	75.6098	56.55	108.046	40.2597	10.044	46.3557	52.9915	4.2112	47.5808	81.5789	43.958	74.51	92.5373	18.9135	31.5899	65.9574	60.599	51.512	52.9915	22.432	41.103	44.9275	28.718	65.943				68.1319	70.256	87.5338	80.5195	91.223	93.471	87.3239	86.9183	101.944	63.9175	41.688	70.2673	83.7838	80.935	92.815	87.3239	37.608	68.0212
63	46.3235	9.75	40.7883	76.8293	71.9699	103.16	40.9091	12.677	49.6384	53.8462	4.5007	44.933	82.8947	41.779	75.116	94.0299	17.8471	27.463	67.0213	50.428	50.082	53.8462	25.95	36.299	45.6522	27.286	67.968				69.2308	96.3395	109.544	81.8182	88.712	103.526	88.7324	73.0644	76.528	64.9485	46.315	65.6978	85.1351	69.867	92.414	88.7324	34.918	70.2286
64	47.0588	10.295	37.4513	78.0488	90.5908	88.8959	41.5584	8.768	48.6053	54.7009	5.7133	42.3059	84.2105	39.919	77.806	95.5224	17.056	26.1449	68.0851	44.013	51.939	54.7009	26.956	34.429	46.3768	29.704	65.395				70.3297	105.572	116.062	83.1169	84.542	106.794	90.1408	54.5991	67.208	65.9794	66.682	58.6515	86.4865	60.926	91.966	90.1408	31.088	70.1756
65	47.7941	11.188	33.25	79.2683	101.348	72.4825	42.2078	9.508	45.2859	55.5556	5.3029	41.1456	85.5263	38.568	76.467	97.0149	17.2245	25.7755	69.1489	42.785	54.111	55.5556	27.074	35.956	47.1014	32.521	63.324				71.4286	96.7498	111.413	84.4156	95.213	104.621	91.5493	33.5191	63.041	67.0103	89.976	52.5463	87.8378	50.937	90.257	91.5493	27.466	66.9751
66	48.5294	12.241	33.6633	80.4878	99.5854	64.8191	42.8571	9.548	40.1815	56.4103	5.9347	40.4786	86.8421	34.485	73.053	98.5075	16.4332	26.5668	70.2128	44.573	58.823	56.4103	27.667	38.822	47.8261	34.324	59.888				72.5275	71.8927	99.5274	85.7143	116.237	94.148	92.9577	22.6902	63.037	68.0412	107.01	48.5782	89.1892	50.912	95.589	92.9577	26.552	62.7241
67	49.2647	10.957	36.2744	81.7073	84.0281	69.0403	43.5065	9.133	36.7562	57.265	6.6001	42.226	88.1579	33.194	67.325	100	16.071	26.1052	71.2766	52.006	65.571	57.265	26.092	42.815	48.5507	36.627	56.62				73.6264	45.6936	80.4625	87.013	115.451	77.235	94.3662	19.9844	63.817	69.0722	99.045	49.8964	90.5405	43.792	103.487	94.3662	27	64.2946
68	50	10.5	41.8462	82.9268	58.3913	82.2912	44.1558	9.776	35.9763	58.1197	6.4776	43.949	89.4737	33.949	59.169				72.3404	77.386	71.898	58.1197	27.531	46.848	49.2754	40.528	52.637				74.7253	31.116	69.0478	88.3117	103.328	59.414	95.7746	19.3361	60.023	70.1031	96.62	57.9502	91.8919	37.158	109.129	95.7746	24.879	76.6537
69	50.7353	11.607	48.0224	84.1463	40.9289	96.0018	44.8052	9.856	36.6382	58.9744	6.5594	45.2483	90.7895	28.406	49.822				73.4043	108.99	77.325	58.9744	28.582	54.527	50	43.774	52.758				75.8242	24.0822	61.8554	89.6104	80.265	48.975	97.1831	18.0465	55.683	71.134	112.739	67.8297	93.2432	37.678	118.496	97.1831	23.456	93.6346
70	51.4706	11.159	53.3806	85.3659	33.9423	104.312	45.4545	9.973	37.7966	59.8291	5.8107	46.2071	92.1053	28.034	43.872				74.4681	131.487	78.642	59.8291	29.071	57.239	50.7246	44.777	50.274				76.9231	20.6169	59.9555	90.9091	59.273	42.846	98.5915	16.3293	52.143	72.1649	134.996	76.8644	94.5946	30.601	123.218	98.5915	23.107	107.369
71	52.2059	10.573	58.4183	86.5854	30.4966	107.738	46.1039	10.443	39.5445	60.6838	5.7258	45.4117	93.4211	23.495	41.228				75.5319	135.512	81.291	60.6838	29.887	57.065	51.4493	51.643	46.973				78.022	16.937	60.9656	92.2078	42.036	41.024	100	16.9555	48.254	73.1959	132.231	77.2287	95.9459	28.374	127.139	100	22.388	111.124
72	52.9412	12.694	60.6025	87.8049	28.5015	106.548	46.7532	11.367	39.1049	61.5385	5.6115	43.2176	94.7368	24.417	43.296				76.5957	115.419	80.941	61.5385	28.776	57.268	52.1739	71.709	42.101				79.1209	14.349	59.788	93.5065	36.206	44.788				74.2268	96.891	75.7499	97.2973	26.768	126.561
73	53.6765	11.917	59.2001	89.0244	27.0084	104.332	47.4026	13.065	38.8724	62.3932	6.2337	40.9745	96.0526	25.069	46.636				77.6596	96.142	81.104	62.3932	31.21	53.412	52.8986	93.59	38.975				80.2198	12.9585	57.7767	94.8052	33.924	47.227				75.2577	86.532	64.0599	98.6486	27.351	119.396
74	54.4118	12.312	59.0435	90.2439	24.7068	103.96	48.0519	10.28	37.3433	63.2479	6.7582	38.641	97.3684	25.799	50.354				78.7234	77.233	82.69	63.2479	31.432	48.913	53.6232	123.427	36.754				81.3187	14.3576	51.2349	96.1039	35.036	48.107				76.2887	60.591	53.1632	100	26.876	107.858
75	55.1471	12.981	58.8464	91.4634	24.1134	101.08	48.7013	10.952	36.0158	64.1026	6.4951	38.2875	98.6842	21.439	50.119				79.7872	70.698	81.727	64.1026	31.076	42.616	54.3478	132.122	37.048				82.4176	13.2098	47.5826	97.4026	33.59	49.108				77.3196	45.624	44.8305
76	55.8824	12.801	54.7716	92.6829	23.863	94.9475	49.3506	10.141	33.7978	64.9573	6.1974	41.0613	100	22.102	46.181				80.8511	67.396	78.133	64.9573	34.861	37.606	55.0725	120.175	43.271				83.5165	11.8274	48.8003	98.7013	36.088	48.003				78.3505	37.495	39.2242
77	56.6176	15.095	47.9302	93.9024	20.951	87.3091	50	10.482	32.9422	65.812	6.1837	47.486							81.9149	65.036	70.851	65.812	31.633	33.914	55.7971	93.066	49.415				84.6154	10.9425	45.3221	100	36.751	41.966				79.3814	35.025	36.2699
78	57.3529	15.824	40.222	95.122	18.681	79.3159	50.6494	9.063	32.1019	66.6667	7.5968	51.788							82.9787	66.414	64.673	66.6667	35.082	32.363	56.5217	64.938	53.375				85.7143	10.5604	41.9433							80.4124	34.249	34.3789
79	58.0882	19.368	39.5394	96.3415	17.7724	71.0288	51.2987	11.697	32.3371	67.5214	8.1204	55.323							84.0426	67.546	59.211	67.5214	39.928	29.434	57.2464	54.659	55.91				86.8132	10.7297	35.3104							81.4433	33.634	32.5439
80	58.8235	20.43	39.6767	97.561	17.7781	68.0397	51.9481	13.784	34.4903	68.3761	8.1769	55.2988							85.1064	69.345	59.454	68.3761	44.777	27.512	57.971	49.872	57.406				87.9121	10.7275	38.0867							82.4742	37.993	28.9951
81	59.5588	22.214	45.6117	98.7805	16.6163	73.8101	52.5974	15.283	36.3819	69.2308	8.2544	52.0004							86.1702	86.346	62.515	69.2308	50.397	26.432	58.6957	45.847	54.265				89.011	10.5939	34.6506							83.5052	41.562	26.6682
82	60.2941	20.093	57.4156	100	14.0955	82.351	53.2468	13.774	38.9245	70.0855	9.7601	48.8606							87.234	112.332	64.784	70.0855	61.916	26.397	59.4203	61.752	51.283				90.1099	9.2105	35.6477							84.5361	36.209	23.5778
83	61.0294	22.447	67.924				53.8961	16.292	43.04	70.9402	10.8201	50.2929							88.2979	122.719	67.974	70.9402	76.947	27.6	60.1449	98.609	47.054				91.2088	8.3978	40.3595							85.567	29.024	23.8669
84	61.7647	24.153	74.4438				54.5455	17.817	45.6176	71.7949	13.1114	53.5667							89.3617	117.118	65.863	71.7949	98.623	29.874	60.8696	132.949	41.06				92.3077	8.1916	43.5081							86.5979	24.829	29.7589
85	62.5	27.567	76.6683				55.1948	17.875	48.3221	72.6496	14.4335	58.3313							90.4255	91.642	63.676	72.6496	99.913	33.328	61.5942	146.086	39.781				93.4066	9.3034	47.7412							87.6289	21.426	38.0607
86	63.2353	33.693	67.9453				55.8442	16.098	49.5869	73.5043	15.3614	64.5578							91.4894	67.69	60.324	73.5043	119.979	41.927	62.3188	138.602	41.937				94.5055	9.7832	49.571							88.6598	16.21	48.7403
87	63.9706	37.255	59.6945				56.4935	16.477	48.7878	74.359	19.3768	69.0461							92.5532	57.089	56.91	74.359	172.145	50.671	63.0435	114.231	46.175				95.6044	8.9835	45.1847							89.6907	15.522	58.2462
88	64.7059	35.819	52.5179				57.1429	14.12	48.9705	75.2137	25.283	74.9625							93.617	50.608	52.09	75.2137	215.569	62.32	63.7681	87.246	52.011				96.7033	7.4604	41.909							90.7216	13.366	62.8412
89	65.4412	33.175	47.5681				57.7922	12.14	50.2224	76.0684	31.4245	82.4293							94.6809	44.552	47.438	76.0684	244.313	76.215	64.4928	82.147	53.765				97.8022	8.7837	39.4145							91.7526	13.082	63.367
90	66.1765	26.353	43.7938				58.4416	12.898	50.3523	76.9231	35.679	83.8134							95.7447	39.806	45.227	76.9231	220.357	85.673	65.2174	80.606	54.677				98.9011	8.6135	35.736							92.7835	14.355	54.8025
91	66.9118	23.113	40.5574				59.0909	12.695	50.3048	77.7778	39.0715	86.1284							96.8085	34.452	40.422	77.7778	184.872	90.589	65.942	86.894	57.027				100	7.4513	33.8871							93.8144	12.628	45.6769
92	67.6471	19.77	36.9181				59.7403	13.1	49.8415	78.6325	50.125	88.8588							97.8723	32.752	39.142	78.6325	133.107	92.975	66.6667	92.631	58.884													94.8454	11.03	41.265
93	68.3824	19.425	34.9471				60.3896	13.264	46.4746	79.4872	67.2516	90.4776							98.9362	30.775	38.645	79.4872	100.935	90.548	67.3913	117.64	60.227													95.8763	10.354	40.9038
94	69.1176	18.16	32.58				61.039	10.174	44.4501	80.3419	75.6448	93.0488							100	26.845	37.426	80.3419	94.772	82.945	68.1159	137.923	61.423													96.9072	9.189	46.3557
95	69.8529	18.42	34.13				61.6883	10.155	45.1779	81.1966	71.0789	92.4625										81.1966	91.875	71.895	68.8406	148.768	57.962													97.9381	7.195	56.1109
96	70.5882	23.26	39.97				62.3377	9.633	47.3223	82.0513	55.3856	89.8038										82.0513	102.887	64.779	69.5652	131.284	56.674													98.9691	7.712	59.9312
97	71.3235	29.26	44.84				62.987	12.173	50.7052	82.906	39.3556	82.8112										82.906	101.21	67.403	70.2899	102.678	56.806													100	6.948	60.0884
98	72.0588	35.26	48.13				63.6364	8.875	48.7981	83.7607	28.5858	77.8853										83.7607	94.242	68.888	71.0145	69.857	61.003
99	72.7941	35.58	51.84				64.2857	8.504	47.0824	84.6154	27.3037	74.1249										84.6154	87.83	76.687	71.7391	46.172	69.378
100	73.5294	31.45	51.58				64.9351	10.583	47.3018	85.4701	24.3842	74.1893										85.4701	93.849	79.901	72.4638	33.482	64.515
101	74.2647	35.68	50.29				65.5844	11.669	47.3979	86.3248	23.1681	75.5199										86.3248	111.744	78.578	73.1884	27.172	58.309
102	75	40.13	50				66.2338	12.892	51.6243	87.1795	22.1546	75.5972										87.1795	111.634	76.254	73.913	21.006	50.075
103	75.7353	53.78	50.71				66.8831	10.935	57.4875	88.0342	19.9032	73.9907										88.0342	101.793	71.244	74.6377	18.244	43.996
104	76.4706	65.39	51				67.5325	11.711	60.9716	88.8889	17.9937	72.9099										88.8889	87.657	65.008	75.3623	15.436	42.831
105	77.2059	63.03	53.84				68.1818	11.945	61.7959	89.7436	16.9223	69.6814										89.7436	66.941	57.393	76.087	14.812	49.651
106	77.9412	51.77	53.58				68.8312	10.605	59.2791	90.5983	15.4473	67.4336										90.5983	55.799	51.725	76.8116	13.538	59.986
107	78.6765	40.19	53				69.4805	13.936	56.5553	91.453	14.909	66.0911										91.453	49.614	48.896	77.5362	12.989	64.753
108	79.4118	42.946	53.9133				70.1299	13.317	53.0255	92.3077	13.2227	66.2462										92.3077	43.889	45.439	78.2609	13.466	66.803
109	80.1471	44.784	57.107				70.7792	13.969	50.7692	93.1624	11.7013	71.1738										93.1624	41.392	43.459	78.9855	12.354	68.515
110	80.8824	49.449	61.192				71.4286	11.59	50.1087	94.0171	10.9665	75.1836										94.0171	41.452	42.726	79.7101	11.16	64.211
111	81.6176	55.683	65.4624				72.0779	12.306	48.2735	94.8718	9.2449	77.9575										94.8718	35.621	43.868	80.4348	11	58.516
112	82.3529	69.088	68.4996				72.7273	11.728	45.6702	95.7265	9.1622	74.6215										95.7265	33.183	49.338	81.1594	10.45	49.085
113	83.0882	91.628	71.1102				73.3766	13.127	41.4936	96.5812	8.8338	68.235										96.5812	36.541	55.848	81.8841	10.164	39.69
114	83.8235	112.114	69.0685				74.026	13.258	39.1037	97.4359	7.9152	58.8116										97.4359	33.057	62.806	82.6087	9.91	28.259
115	84.5588	114.598	65.7612				74.6753	13.97	39.65	98.2906	6.1628	53.4416										98.2906	30.229	64.866	83.3333	9.789	20.803
116	85.2941	97.993	67.3241				75.3247	14.439	42.9723	99.1453	6.6652	50.7543										99.1453	26.06	62.718	84.058	10.019	18.151
117	86.0294	72.421	71.5316				75.974	15.037	47.63	100	6.0595	50.3846										100	30.318	57.15	84.7826	10	19.293
118	86.7647	52.218	79.3113				76.6234	16.047	50.8969																85.5072	9.363	19.84
119	87.5	40.161	84.6387				77.2727	15.711	52.586																86.2319	8.893	20.47
120	88.2353	36.011	89.8588				77.9221	17.048	56.1408																86.9565	10.004	21.924
121	88.9706	32.869	89.0898				78.5714	24.184	57.8546																87.6812	10.641	26.303
122	89.7059	28.101	83.2825				79.2208	35.077	57.4416																88.4058	9.011	27.944
123	90.4412	20.84	74.2207				79.8701	58.441	58.8683																89.1304	9.366	31.572
124	91.1765	15.726	63.6436				80.5195	92.06	64.8231																89.8551	7.926	30.956
125	91.9118	14.118	56.3434				81.1688	118.775	70.8999																90.5797	7.837	29.621
126	92.6471	14.12	50.2685				81.8182	122.836	80.1189																91.3043	8.042	27.483
127	93.3824	12.728	46.7125				82.4675	115.783	89.8267																92.029	8.053	25.767
128	94.1176	11.507	47.2781				83.1169	110.933	92.956																92.7536	8.05	25.204
129	94.8529	11.764	46.86				83.7662	85.705	99.8084																93.4783	7.125	22.123
130	95.5882	10.334	48.1473				84.4156	53.674	99.1809																94.2029	7.551	21.078
131	96.3235	11.76	47.2149				85.0649	37.68	97.2879																94.9275	6.975	21.448
132	97.0588	11.347	48.2608				85.7143	37.75	96.9151																95.6522	6.701	21.876
133	97.7941	9.884	49.4473				86.3636	37.569	96.7563																96.3768	7.416	22.136
134	98.5294	9.481	50.6329				87.013	44.111	101.835																97.1014	8.347	24.546
135	99.2647	9.243	51.2032				87.6623	47.477	107.939																97.8261	6.961	24.639
136	100	9.419	51.7689				88.3117	48.596	106.409																98.5507	7.412	24.46
137							88.961	43.815	103.651																99.2754	6.829	22.666
138							89.6104	41.24	96.2712																100	5.603	21.418
139							90.2597	40.585	90.0524
140							90.9091	37.749	89.3162
141							91.5584	33.937	91.9988
142							92.2078	31.961	100.424
143							92.8571	33.687	105.983
144							93.5065	33.659	104.999
145							94.1558	31.205	96.9274
146							94.8052	25.175	82.6285
147							95.4545	24.672	68.1339
148							96.1039	25.515	57.6704
149							96.7532	23.743	50.5027
150							97.4026	24.673	45.441
151							98.0519	30.239	46.795
152							98.7013	33.47	51.0259
153							99.3506	34.11	52.8063
154							100	42.503	50.2136
	0			0			0			0			0			0			0			0			0			0			0			0			0			0			0			0			0
	5	8.92143	121.185	5	14.9937	86.4102	5	9.625	147.875	5	9.05032	93.007	5	18.2167	162.286	5	21.0149	94.8731	5	14.6278	135.932	5	20.6368	183.133	5	7.01914	128.16	5	16.1077	115.252	5	8.57208	119.041	5	11.099	137.979	5	7.12112	133.728	5	6.8858	101.521	5	21.9888	176.708	5	16.5175	140.369	5
	10	7.38143	80.2066	10	12.7272	86.3733	10	10.6383	67.6179	10	5.74173	62.2793	10	21.5703	111.419	10	19.8201	49.5615	10	14.2354	111.749	10	21.6497	82.3052	10	8.76343	64.4939	10	15.061	77.6192	10	7.32878	62.6745	10	10.8145	92.854	10	6.35887	85.9233	10	5.8518	54.4107	10	31.142	191.99	10	15.5958	97.6082	10
	15	6.72043	53.3898	15	14.7741	92.2559	15	10.0473	38.4638	15	4.09135	35.0613	15	32.0697	78.2755	15	18.8515	30.4938	15	14.1758	71.1262	15	20.9247	44.9942	15	9.22614	56.1954	15	13.2903	59.6467	15	7.79838	54.9586	15	8.96275	73.2417	15	6.92403	66.3133	15	6.5142	42.3646	15	27.7402	123.752	15	18.87	92.755	15
	20	6.67	44.7623	20	17.2396	82.6409	20	10.4076	40.6428	20	4.0015	32.9237	20	32.182	78.765	20	19.9034	28.2802	20	15.2248	60.6033	20	23.638	50.202	20	9.003	48.3433	20	14.1747	62.0137	20	7.25452	56.9299	20	8.962	42.2542	20	6.99162	60.3478	20	6.0406	54.1313	20	20.365	104.61	20	20.7467	60.9752	20
	25	7.02986	40.3901	25	13.7092	82.4566	25	14.3063	30.0004	25	4.3775	28.9566	25	25.361	60.4087	25	18.0697	32.5666	25	16.3904	73.581	25	23.1663	43.4002	25	10.9764	48.0831	25	14.9877	59.217	25	7.8825	37.175	25	9.03125	42.992	25	7.54283	44.8587	25	6.7534	35.9839	25	17.144	95.4052	25	20.413	62.6176	25
	30	7.57114	39.2747	30	12.5989	70.5182	30	12.4449	24.9146	30	3.77812	36.6285	30	24.468	63.2398	30	17.864	40.4929	30	17.4564	71.7212	30	22.1032	38.0025	30	12.6614	43.6437	30	18.6303	49.1345	30	8.906	37.766	30	11.447	47.2342	30	6.7517	48.75	30	7.514	32.6087	30	17.292	81.4325	30	19.9545	56.7532	30
	35	7.86057	45.0939	35	12.4757	57.7421	35	12.1611	30.203	35	4.3034	34.729	35	22.7363	65.5023	35	19.0053	40.8028	35	16.4715	70.882	35	24.2612	60.4938	35	17.5286	47.8577	35	20.523	58.6976	35	9.1475	42.75	35	14.5507	35.0433	35	7.02107	51.865	35	5.945	43.6923	35	21.0703	85.9637	35	21.2357	61.8104	35
	40	8.74029	62.6192	40	12.8688	61.3277	40	11.2312	36.1926	40	4.5162	36.2961	40	25.2877	69.4285	40	19.3762	35.9189	40	17.878	83.1622	40	22.8332	64.0715	40	22.4291	51.504	40	24.3797	69.1773	40	11.4	44.212	40	17.4075	29.666	40	8.74455	57.7955	40	6.1452	68.7416	40	20.928	107.081	40	27.355	98.2084	40
	45	9.58	42.7542	45	13.1721	64.1136	45	9.91375	42.4297	45	5.03755	36.5913	45	28.4705	75.7613	45	20.2467	33.706	45	18.7536	70.9682	45	25.067	57.8905	45	25.7363	48.058	45	32.5227	76.7948	45	15.015	46.6025	45	16.8368	43.46	45	10.3035	66.003	45	7.9318	105.113	45	27.7773	112.331	45	31.4723	76.4155	45
	50	10.7081	38.3162	50	13.175	86.0342	50	10.8379	36.9272	50	5.1252	39.8114	50	39.61	71.4098	50	20.1155	38.0136	50	19.6452	64.2312	50	24.6568	51.2405	50	34.9663	59.7986	50	65.801	120.368	50	12.9617	52.6658	50	15.3175	45.0597	50	10.1538	71.354	50	8.485	46.9939	50	35.952	95.2977	50	37.404	102.163	50
	55	11.5374	54.3591	55	14.7278	96.1992	55	13.524	36.9794	55	5.11818	44.6155	55	46.086	62.8165	55	21.5366	42.1322	55	22.2034	59.5892	55	24.7535	43.612	55	80.1489	43.5547	55	91.39	113.066	55	12.9175	50.7027	55	15.4423	57.2815	55	11.2055	81.7852	55	12.0662	30.1976	55	44.226	89.501	55	42.1153	83.4244	55
	60	16.959	46.6569	60	15.1501	97.5491	60	14.4254	49.5485	60	6.11423	43.2091	60	56.688	76.9797	60	23.5541	40.1541	60	28.3164	47.2428	60	27.6695	46.0345	60	70.0441	52.1321	60	65.249	70.3437	60	16.6507	42.7894	60	19.411	61.9225	60	11.0166	60.139	60	20.246	34.5417	60	61.8357	107.792	60	44.8023	91.4806	60
	65	28.7181	65.2299	65	18.0526	84.4344	65	10.4201	47.164	65	6.17028	41.2656	65	79.2445	78.9125	65	47.1217	35.3257	65	54.2756	51.0812	65	31.207	49.48	65	114.267	45.969	65	101.903	58.1055	65	26.7115	44.1911	65	25.2892	79.5595	65	15.9426	77.987	65	35.969	64.3903	65	84.917	98.6743	65	65.0935	117.795	65
	70	22.6309	38.6421	70	20.4531	64.4699	70	11.9561	56.4445	70	7.66644	52.3792	70	108.135	77.1352	70	45.4842	30.1652	70	49.4562	51.911	70	40.3634	29.931	70	113.678	58.1249	70	116.103	59.7616	70	61.6358	78.4908	70	29.709	64.418	70	28.403	77.1377	70	90.6783	52.4181	70	114.385	82.1703	70	113.444	92.6199	70
	75	32.9457	48.0929	75	33.3802	85.7237	75	12.9081	46.0118	75	13.8105	57.4426	75	94.42	93.592	75	27.381	45.3395	75	82.8884	70.4518	75	104.921	34.9662	75	45.5159	57.726	75	83.9123	85.71	75	70.2048	95.3026	75	30.452	49.7032	75	77.6549	97.517	75	114.695	71.1246	75	205.783	152.644	75	104.669	85.3903	75
	80	51.0337	52.2919	80	80.1146	93.1461	80	24.498	53.0488	80	41.4724	84.445	80	60.5027	87.7335	80	29.4218	65.8817	80	99.0008	81.5506	80	183.192	83.0533	80	13.3936	59.5357	80	53.4943	80.0117	80	18.9963	60.6411	80	52.9472	69.0915	80	73.3816	113.307	80	53.0534	47.5095	80	132.637	148.023	80	121.94	113.965	80
	85	76.7634	65.4573	85	70.7334	78.0381	85	99.9666	85.3734	85	49.5591	85.0228	85	43.7567	75.5392	85	50.1589	58.3233	85	66.598	68.217	85	95.4693	72.0995	85	10.1903	33.3996	85	39.2433	84.1529	85	12.6592	50.1433	85	89.9225	102.103	85	86.3271	138.766	85	36.7294	29.2328	85	88.9843	97.7567	85	52.827	82.9449	85
	90	51.3963	80.7195	90	29.9872	105.733	90	42.2798	100.883	90	20.7544	73.6481	90	35.049	69.0035	90	30.8064	46.7666	90	101.572	64.118	90	95.603	71.3963	90	9.31486	25.5727	90	34.106	72.5084	90	10.6529	37.4978	90	103.82	69.943	90	86.285	102.161	90	21.4022	39.7346	90	58.1605	92.5565	90	37.0523	67.9386	90
	95	14.4004	55.0467	95	23.4085	96.8242	95	33.4947	95.2912	95	12.5819	70.681	95	26.088	44.5545	95	18.5262	31.9053	95	62.3162	56.0876	95	44.6278	46.0188	95	7.66186	24.6749	95	23.21	67.0507	95	8.9773	43.3655	95	42.8597	43.9713	95	32.6982	64.2758	95	12.8922	53.5905	95	37.3072	113.582	95	28.0265	66.0423	95
	100	10.2097	49.525	100	16.9887	74.9091	100	29.8656	52.8236	100	7.46645	59.3748	100	23.6022	48.3225	100	16.6962	26.1481	100	32.926	40.1724	100	31.5647	58.7877	100	7.03843	23.1059	100	15.4473	72.9714	100	8.25848	39.2263	100	35.3663	46.796	100	17.6669	54.0257	100	8.2796	52.678	100	27.3422	120.239	100	23.4575	97.1953	100
[truncated: 52 more columns]

## Sheet: Normalised
	0			0			0			0			0			0			0			0			0			0			0			0			0			0			0			0			0
	5	8.92143	121.185	5	14.9937	86.4102	5	9.625	147.875	5	9.05032	93.007	5	18.2167	162.286	5	21.0149	94.8731	5	14.6278	135.932	5	20.6368	183.133	5	7.01914	128.16	5	16.1077	115.252	5	8.57208	119.041	5	11.099	137.979	5	7.12112	133.728	5	6.8858	101.521	5	21.9888	176.708	5	16.5175	140.369	5
	10	7.38143	80.2066	10	12.7272	86.3733	10	10.6383	67.6179	10	5.74173	62.2793	10	21.5703	111.419	10	19.8201	49.5615	10	14.2354	111.749	10	21.6497	82.3052	10	8.76343	64.4939	10	15.061	77.6192	10	7.32878	62.6745	10	10.8145	92.854	10	6.35887	85.9233	10	5.8518	54.4107	10	31.142	191.99	10	15.5958	97.6082	10
	15	6.72043	53.3898	15	14.7741	92.2559	15	10.0473	38.4638	15	4.09135	35.0613	15	32.0697	78.2755	15	18.8515	30.4938	15	14.1758	71.1262	15	20.9247	44.9942	15	9.22614	56.1954	15	13.2903	59.6467	15	7.79838	54.9586	15	8.96275	73.2417	15	6.92403	66.3133	15	6.5142	42.3646	15	27.7402	123.752	15	18.87	92.755	15
	20	6.67	44.7623	20	17.2396	82.6409	20	10.4076	40.6428	20	4.0015	32.9237	20	32.182	78.765	20	19.9034	28.2802	20	15.2248	60.6033	20	23.638	50.202	20	9.003	48.3433	20	14.1747	62.0137	20	7.25452	56.9299	20	8.962	42.2542	20	6.99162	60.3478	20	6.0406	54.1313	20	20.365	104.61	20	20.7467	60.9752	20
	25	7.02986	40.3901	25	13.7092	82.4566	25	14.3063	30.0004	25	4.3775	28.9566	25	25.361	60.4087	25	18.0697	32.5666	25	16.3904	73.581	25	23.1663	43.4002	25	10.9764	48.0831	25	14.9877	59.217	25	7.8825	37.175	25	9.03125	42.992	25	7.54283	44.8587	25	6.7534	35.9839	25	17.144	95.4052	25	20.413	62.6176	25
	30	7.57114	39.2747	30	12.5989	70.5182	30	12.4449	24.9146	30	3.77812	36.6285	30	24.468	63.2398	30	17.864	40.4929	30	17.4564	71.7212	30	22.1032	38.0025	30	12.6614	43.6437	30	18.6303	49.1345	30	8.906	37.766	30	11.447	47.2342	30	6.7517	48.75	30	7.514	32.6087	30	17.292	81.4325	30	19.9545	56.7532	30
	35	7.86057	45.0939	35	12.4757	57.7421	35	12.1611	30.203	35	4.3034	34.729	35	22.7363	65.5023	35	19.0053	40.8028	35	16.4715	70.882	35	24.2612	60.4938	35	17.5286	47.8577	35	20.523	58.6976	35	9.1475	42.75	35	14.5507	35.0433	35	7.02107	51.865	35	5.945	43.6923	35	21.0703	85.9637	35	21.2357	61.8104	35
	40	8.74029	62.6192	40	12.8688	61.3277	40	11.2312	36.1926	40	4.5162	36.2961	40	25.2877	69.4285	40	19.3762	35.9189	40	17.878	83.1622	40	22.8332	64.0715	40	22.4291	51.504	40	24.3797	69.1773	40	11.4	44.212	40	17.4075	29.666	40	8.74455	57.7955	40	6.1452	68.7416	40	20.928	107.081	40	27.355	98.2084	40
	45	9.58	42.7542	45	13.1721	64.1136	45	9.91375	42.4297	45	5.03755	36.5913	45	28.4705	75.7613	45	20.2467	33.706	45	18.7536	70.9682	45	25.067	57.8905	45	25.7363	48.058	45	32.5227	76.7948	45	15.015	46.6025	45	16.8368	43.46	45	10.3035	66.003	45	7.9318	105.113	45	27.7773	112.331	45	31.4723	76.4155	45
	50	10.7081	38.3162	50	13.175	86.0342	50	10.8379	36.9272	50	5.1252	39.8114	50	39.61	71.4098	50	20.1155	38.0136	50	19.6452	64.2312	50	24.6568	51.2405	50	34.9663	59.7986	50	65.801	120.368	50	12.9617	52.6658	50	15.3175	45.0597	50	10.1538	71.354	50	8.485	46.9939	50	35.952	95.2977	50	37.404	102.163	50
	55	11.5374	54.3591	55	14.7278	96.1992	55	13.524	36.9794	55	5.11818	44.6155	55	46.086	62.8165	55	21.5366	42.1322	55	22.2034	59.5892	55	24.7535	43.612	55	80.1489	43.5547	55	91.39	113.066	55	12.9175	50.7027	55	15.4423	57.2815	55	11.2055	81.7852	55	12.0662	30.1976	55	44.226	89.501	55	42.1153	83.4244	55
	60	16.959	46.6569	60	15.1501	97.5491	60	14.4254	49.5485	60	6.11423	43.2091	60	56.688	76.9797	60	23.5541	40.1541	60	28.3164	47.2428	60	27.6695	46.0345	60	70.0441	52.1321	60	65.249	70.3437	60	16.6507	42.7894	60	19.411	61.9225	60	11.0166	60.139	60	20.246	34.5417	60	61.8357	107.792	60	44.8023	91.4806	60
	65	28.7181	65.2299	65	18.0526	84.4344	65	10.4201	47.164	65	6.17028	41.2656	65	79.2445	78.9125	65	47.1217	35.3257	65	54.2756	51.0812	65	31.207	49.48	65	114.267	45.969	65	101.903	58.1055	65	26.7115	44.1911	65	25.2892	79.5595	65	15.9426	77.987	65	35.969	64.3903	65	84.917	98.6743	65	65.0935	117.795	65
	70	22.6309	38.6421	70	20.4531	64.4699	70	11.9561	56.4445	70	7.66644	52.3792	70	108.135	77.1352	70	45.4842	30.1652	70	49.4562	51.911	70	40.3634	29.931	70	113.678	58.1249	70	116.103	59.7616	70	61.6358	78.4908	70	29.709	64.418	70	28.403	77.1377	70	90.6783	52.4181	70	114.385	82.1703	70	113.444	92.6199	70
	75	32.9457	48.0929	75	33.3802	85.7237	75	12.9081	46.0118	75	13.8105	57.4426	75	94.42	93.592	75	27.381	45.3395	75	82.8884	70.4518	75	104.921	34.9662	75	45.5159	57.726	75	83.9123	85.71	75	70.2048	95.3026	75	30.452	49.7032	75	77.6549	97.517	75	114.695	71.1246	75	205.783	152.644	75	104.669	85.3903	75
	80	51.0337	52.2919	80	80.1146	93.1461	80	24.498	53.0488	80	41.4724	84.445	80	60.5027	87.7335	80	29.4218	65.8817	80	99.0008	81.5506	80	183.192	83.0533	80	13.3936	59.5357	80	53.4943	80.0117	80	18.9963	60.6411	80	52.9472	69.0915	80	73.3816	113.307	80	53.0534	47.5095	80	132.637	148.023	80	121.94	113.965	80
	85	76.7634	65.4573	85	70.7334	78.0381	85	99.9666	85.3734	85	49.5591	85.0228	85	43.7567	75.5392	85	50.1589	58.3233	85	66.598	68.217	85	95.4693	72.0995	85	10.1903	33.3996	85	39.2433	84.1529	85	12.6592	50.1433	85	89.9225	102.103	85	86.3271	138.766	85	36.7294	29.2328	85	88.9843	97.7567	85	52.827	82.9449	85
	90	51.3963	80.7195	90	29.9872	105.733	90	42.2798	100.883	90	20.7544	73.6481	90	35.049	69.0035	90	30.8064	46.7666	90	101.572	64.118	90	95.603	71.3963	90	9.31486	25.5727	90	34.106	72.5084	90	10.6529	37.4978	90	103.82	69.943	90	86.285	102.161	90	21.4022	39.7346	90	58.1605	92.5565	90	37.0523	67.9386	90
	95	14.4004	55.0467	95	23.4085	96.8242	95	33.4947	95.2912	95	12.5819	70.681	95	26.088	44.5545	95	18.5262	31.9053	95	62.3162	56.0876	95	44.6278	46.0188	95	7.66186	24.6749	95	23.21	67.0507	95	8.9773	43.3655	95	42.8597	43.9713	95	32.6982	64.2758	95	12.8922	53.5905	95	37.3072	113.582	95	28.0265	66.0423	95
	100	10.2097	49.525	100	16.9887	74.9091	100	29.8656	52.8236	100	7.46645	59.3748	100	23.6022	48.3225	100	16.6962	26.1481	100	32.926	40.1724	100	31.5647	58.7877	100	7.03843	23.1059	100	15.4473	72.9714	100	8.25848	39.2263	100	35.3663	46.796	100	17.6669	54.0257	100	8.2796	52.678	100	27.3422	120.239	100	23.4575	97.1953	100
	0			0			0			0			0			0			0			0			0			0			0			0			0			0			0			0			0
	5	1	1	5	1	1	5	1	1	5	1	1	5	1	1	5	1	1	5	1	1	5	1	1	5	1	1	5	1	1	5	1	1	5	1	1	5	1	1	5	1	1	5	1	1	5	1	1	5
	10	0.827382	0.661851	10	0.848835	0.999573	10	1.10527	0.457264	10	0.634423	0.66962	10	1.18409	0.686563	10	0.943147	0.522398	10	0.973174	0.822097	10	1.04908	0.449427	10	1.2485	0.50323	10	0.935016	0.673473	10	0.854959	0.526497	10	0.974367	0.672956	10	0.892959	0.642524	10	0.849836	0.535953	10	1.41627	1.08648	10	0.944196	0.695371	10
	15	0.753291	0.440563	15	0.985357	1.06765	15	1.04387	0.26011	15	0.452067	0.376975	15	1.76045	0.482331	15	0.897055	0.321417	15	0.9691	0.523248	15	1.01395	0.245691	15	1.31443	0.43848	15	0.825089	0.517532	15	0.909741	0.461679	15	0.807528	0.530817	15	0.972323	0.495883	15	0.946034	0.417298	15	1.26157	0.700317	15	1.14242	0.660796	15
	20	0.747638	0.36937	20	1.14979	0.956378	20	1.08131	0.274846	20	0.442139	0.353992	20	1.76662	0.485347	20	0.947107	0.298085	20	1.04081	0.445834	20	1.14543	0.274128	20	1.28264	0.377211	20	0.87999	0.538069	20	0.846296	0.478239	20	0.80746	0.306236	20	0.981815	0.451273	20	0.877255	0.533201	20	0.926155	0.59199	20	1.25605	0.434393	20
	25	0.787974	0.333292	25	0.914331	0.954246	25	1.48636	0.202877	25	0.483685	0.311338	25	1.39218	0.372236	25	0.859852	0.343265	25	1.1205	0.541307	25	1.12257	0.236986	25	1.56378	0.375181	25	0.930463	0.513804	25	0.919555	0.312288	25	0.813699	0.311583	25	1.05922	0.335448	25	0.980772	0.354447	25	0.779671	0.539902	25	1.23584	0.446094	25
	30	0.848647	0.324088	30	0.840278	0.816087	30	1.29297	0.168484	30	0.417457	0.393826	30	1.34316	0.389681	30	0.850062	0.426811	30	1.19337	0.527625	30	1.07105	0.207513	30	1.80384	0.340542	30	1.15661	0.426322	30	1.03895	0.317253	30	1.03135	0.342329	30	0.948123	0.364547	30	1.09123	0.3212	30	0.786402	0.46083	30	1.20808	0.404315	30
	35	0.881089	0.372107	35	0.832063	0.668232	35	1.2635	0.204247	35	0.475497	0.373402	35	1.2481	0.403622	35	0.904371	0.430078	35	1.12604	0.521451	35	1.17563	0.330326	35	2.49725	0.373422	35	1.27411	0.509298	35	1.06713	0.359121	35	1.31099	0.253975	35	0.985949	0.38784	35	0.863371	0.430375	35	0.958232	0.486472	35	1.28565	0.440343	35
	40	0.979696	0.516723	40	0.85828	0.709727	40	1.16688	0.244751	40	0.49901	0.390251	40	1.38816	0.427816	40	0.922022	0.3786	40	1.22219	0.611792	40	1.10643	0.349862	40	3.19542	0.401874	40	1.51354	0.600226	40	1.3299	0.371402	40	1.56838	0.215003	40	1.22797	0.432188	40	0.892445	0.677114	40	0.951759	0.605975	40	1.65612	0.699647	40
	45	1.07382	0.3528	45	0.878509	0.741967	45	1.03	0.286929	45	0.556616	0.393426	45	1.56287	0.466838	45	0.963444	0.355275	45	1.28205	0.522085	45	1.21467	0.316111	45	3.66659	0.374985	45	2.01907	0.66632	45	1.75162	0.391484	45	1.51696	0.314975	45	1.44689	0.493562	45	1.15191	1.03537	45	1.26325	0.635685	45	1.90539	0.544392	45
	50	1.20027	0.316179	50	0.878705	0.995649	50	1.12601	0.249719	50	0.566301	0.428048	50	2.17437	0.440024	50	0.957202	0.400678	50	1.343	0.472524	50	1.1948	0.279799	50	4.98156	0.466594	50	4.08505	1.04439	50	1.51209	0.442418	50	1.38008	0.326569	50	1.42587	0.533577	50	1.23225	0.462897	50	1.63502	0.539294	50	2.26451	0.727821	50
	55	1.29323	0.448562	55	0.982265	1.11328	55	1.40509	0.250072	55	0.565525	0.4797	55	2.52987	0.387073	55	1.02482	0.44409	55	1.51789	0.438374	55	1.19948	0.238143	55	11.4186	0.339847	55	5.67367	0.981028	55	1.50692	0.425927	55	1.39132	0.415146	55	1.57356	0.61158	55	1.75233	0.297451	55	2.0113	0.50649	55	2.54974	0.594324	55
	60	1.90093	0.385004	60	1.01043	1.12891	60	1.49874	0.33507	60	0.675582	0.464579	60	3.11186	0.474346	60	1.12083	0.42324	60	1.93579	0.347547	60	1.34078	0.251371	60	9.97902	0.406775	60	4.05078	0.610346	60	1.94243	0.359452	60	1.7489	0.448781	60	1.54704	0.449712	60	2.94025	0.340241	60	2.81215	0.609998	60	2.71242	0.651717	60
	65	3.21901	0.538266	65	1.20401	0.977135	65	1.08261	0.318945	65	0.681775	0.443683	65	4.35009	0.486256	65	2.2423	0.372347	65	3.71044	0.375784	65	1.5122	0.270185	65	16.2794	0.358685	65	6.32635	0.50416	65	3.1161	0.371227	65	2.27852	0.576605	65	2.23877	0.583177	65	5.22365	0.634254	65	3.86184	0.558401	65	3.94088	0.839185	65
	70	2.53669	0.318868	70	1.36411	0.746091	70	1.2422	0.381704	70	0.847091	0.563175	70	5.93603	0.475304	70	2.16438	0.317954	70	3.38098	0.381889	70	1.95589	0.163438	70	16.1954	0.453535	70	7.20792	0.518529	70	7.19029	0.659361	70	2.67673	0.466867	70	3.98856	0.576826	70	13.1689	0.516326	70	5.20199	0.465005	70	6.86809	0.659833	70
	75	3.69287	0.396854	75	2.22628	0.992055	75	1.3411	0.311153	75	1.52597	0.617616	75	5.18314	0.57671	75	1.30293	0.477896	75	5.6665	0.518286	75	5.08414	0.190933	75	6.48453	0.450422	75	5.20944	0.743674	75	8.18994	0.800588	75	2.74367	0.360223	75	10.9049	0.72922	75	16.6568	0.700587	75	9.35855	0.863815	75	6.33685	0.60833	75
	80	5.72035	0.431504	80	5.34322	1.07795	80	2.54525	0.358741	80	4.58243	0.907942	80	3.32127	0.54061	80	1.40004	0.69442	80	6.76799	0.599936	80	8.87695	0.453513	80	1.90815	0.464543	80	3.32103	0.694231	80	2.21606	0.509415	80	4.77045	0.500738	80	10.3048	0.847299	80	7.70475	0.467976	80	6.03203	0.837665	80	7.38249	0.811902	80
	85	8.60439	0.540142	85	4.71754	0.903112	85	10.3861	0.577335	85	5.47595	0.914154	85	2.40201	0.46547	85	2.38682	0.61475	85	4.55284	0.501846	85	4.62616	0.393699	85	1.45178	0.260609	85	2.4363	0.730164	85	1.47679	0.421228	85	8.10186	0.739988	85	12.1227	1.03768	85	5.33408	0.287947	85	4.04681	0.553209	85	3.19824	0.590908	85
	90	5.76099	0.666083	90	1.99999	1.22361	90	4.3927	0.682219	90	2.29322	0.791855	90	1.924	0.425197	90	1.46593	0.492939	90	6.94376	0.471691	90	4.63264	0.389859	90	1.32706	0.199538	90	2.11737	0.629128	90	1.24274	0.314999	90	9.35402	0.50691	90	12.1168	0.76395	90	3.10816	0.391391	90	2.64501	0.523781	90	2.24322	0.484002	90
	95	1.61414	0.454236	95	1.56123	1.12052	95	3.47997	0.644404	95	1.39022	0.759953	95	1.43209	0.274543	95	0.881575	0.336294	95	4.26012	0.412615	95	2.16253	0.251286	95	1.09157	0.192532	95	1.44092	0.581774	95	1.04727	0.364291	95	3.86159	0.31868	95	4.59172	0.480646	95	1.87229	0.527874	95	1.69665	0.642768	95	1.69678	0.470492	95
	100	1.1444	0.408672	100	1.13305	0.866901	100	3.10292	0.357218	100	0.824993	0.63839	100	1.29563	0.297761	100	0.794492	0.275611	100	2.25092	0.295533	100	1.52953	0.32101	100	1.00275	0.18029	100	0.958995	0.633146	100	0.963416	0.32952	100	3.18644	0.339152	100	2.48091	0.403998	100	1.20242	0.518886	100	1.24347	0.680434	100	1.42016	0.692429	100
[truncated: 48 more columns]

## Sheet: Summary
% Chromosome Length		Mean	STDDEV	SEM		Mean	STDDEV	SEM
0-5	FISH	14.0016	4.83693	0.868738	IF	1	0	0
5-10		14.6004	6.55523	1.17735		0.70233	0.202853	0.0364335
10-15		14.7497	7.88173	1.4156		0.523882	0.186846	0.0335585
15-20		14.7273	7.44973	1.33801		0.48615	0.193035	0.03467
20-25		15.5958	9.9225	1.78213		0.454662	0.171055	0.0307223
25-30		15.7382	8.23672	1.47936		0.433404	0.140641	0.0252599
30-35		16.7717	8.90435	1.59927		0.447704	0.122192	0.0219464
35-40		17.7758	8.88272	1.59538		0.498118	0.149118	0.0267824
40-45		19.1922	8.3922	1.50728		0.563857	0.205713	0.0369472
45-50		21.202	12.2135	2.19362		0.593263	0.234019	0.042031
50-55		25.8056	19.6214	3.52411		0.502863	0.189543	0.0340429
55-60		29.7543	17.9967	3.23231		0.484641	0.17058	0.030637
60-65		41.2519	26.3878	4.73939		0.521054	0.177218	0.0318293
65-70		59.94	36.5633	6.56696		0.553364	0.185497	0.0333162
70-75		84.012	49.4461	8.88078		0.680866	0.269441	0.048393
75-80		90.9927	46.5576	8.36199		0.687883	0.221212	0.0397308
80-85		75.706	40.2692	7.23255		0.649752	0.224027	0.0402365
85-90		53.572	36.0921	6.48233		0.57075	0.251943	0.0452504
90-95		44.7478	48.0162	8.62397		0.497559	0.247425	0.0444388
95-100		29.3515	26.9212	4.83519		0.457804	0.216998	0.038974
