# Supplementary material for: Large domains of heterochromatin direct the formation of short mitotic chromosome loops
Source: eLife. 2020 Sep 11;9:e57212. doi: 10.7554/eLife.57212 (PMC7515631; doi:10.7554/eLife.57212)
Supplement: Figure 3—figure supplement 1—source data 2. [file elife-57212-fig3-figsupp1-data2.xlsx]

## Sheet: FISH Binned
	3	FISH	4	FISH	6	FISH	7	FISH	13	FISH	14	FISH	15	FISH	16	FISH	17	FISH	18	FISH	19	FISH	23	FISH	26	FISH	27	FISH	28	FISH	29	FISH	31	FISH	32	FISH	33	FISH	37	FISH	38	FISH	39	FISH	45	FISH	46A	FISH	46B
X	X	Y	X	Y	X	Y	X	Y	X	Y	X	Y	X	Y	X	Y	X	Y	X	Y	X	Y	X	Y	X	Y	X	Y	X	Y	X	Y	X	Y	X	Y	X	Y	X	Y	X	Y	X	Y	X	Y	X	Y	X
0	0	560	0	408	0	349	0	373	0	368	0	531	0	345	0	442	0	493	0	365	0	457	0	373	0	342	0	862	0	573	0	1087	0	552	0	452	0	463	0	386	0	310	0	449	0	576	0	445	0
0.11	1.63934	661.01	1.6129	437.04	2	387.96	1.92308	388.82	1.31579	352	2.22222	604.61	2.08333	333.64	2.77778	483.64	2.22222	554.55	1.69492	358.3	2.27273	526.08	1.63934	387.1	1.69492	384.38	2.08333	962.23	2.12766	662.9	1.5873	1459.94	2.12766	533.85	1.63934	514.1	1.75439	549.96	1.66667	463.77	2.04082	330.64	1.49254	449.13	2.17391	638.71	2.5641	514.31	2.32558
0.22	3.27869	759.36	3.22581	458.12	4	451.88	3.84615	402.56	2.63158	375.53	4.44444	683.72	4.16667	360.72	5.55556	535	4.44444	617.3	3.38983	354.43	4.54545	607.93	3.27869	419.85	3.38983	418.89	4.16667	1047.69	4.25532	780.06	3.1746	1957.74	4.25532	501.43	3.27869	578.39	3.50877	614.81	3.33333	527.26	4.08163	363.22	2.98507	474.18	4.34783	697.46	5.12821	583.75	4.65116
0.33	4.91803	901.84	4.83871	497.96	6	522.55	5.76923	396.2	3.94737	405.47	6.66667	829.36	6.25	411.4	8.33333	639.35	6.66667	698.56	5.08475	358.2	6.81818	773.63	4.91803	461.69	5.08475	453.85	6.25	1140.74	6.38298	906.65	4.7619	2327.57	6.38298	478.47	4.91803	661.53	5.26316	764.1	5	575.59	6.12245	411.11	4.47761	527.74	6.52174	764.9	7.69231	692.07	6.97674
0.44	6.55738	1029.33	6.45161	526.64	8	628.59	7.69231	444.96	5.26316	475.55	8.88889	981.23	8.33333	476.52	11.1111	762.72	8.88889	847.62	6.77966	405.35	9.09091	1041.89	6.55738	514.47	6.77966	511.6	8.33333	1187.15	8.51064	1078.28	6.34921	2442.79	8.51064	474.86	6.55738	750.88	7.01754	934.1	6.66667	674.3	8.16327	464.41	5.97015	594.86	8.69565	893.28	10.2564	822.94	9.30233
0.55	8.19672	1168.98	8.06452	521	10	763.06	9.61538	454.67	6.57895	519.56	11.1111	1130.16	10.4167	549.07	13.8889	893.43	11.1111	1236.95	8.47458	418.29	11.3636	1350.84	8.19672	565.44	8.47458	562.38	10.4167	1331.19	10.6383	1237.8	7.93651	2359.18	10.6383	503.37	8.19672	850.11	8.77193	1203.67	8.33333	821.63	10.2041	543.81	7.46269	665.71	10.8696	1063.32	12.8205	1073.37	11.6279
0.66	9.83607	1409.27	9.67742	553.52	12	1070.76	11.5385	509.35	7.89474	635.2	13.3333	1396.65	12.5	692.21	16.6667	1049.38	13.3333	1767.2	10.1695	466.11	13.6364	1741.9	9.83607	629.52	10.1695	631.36	12.5	1551.54	12.766	1349.78	9.52381	2126.91	12.766	589.55	9.83607	950.27	10.5263	1589.12	10	1049.15	12.2449	594.53	8.95522	823.2	13.0435	1309.45	15.3846	1346.87	13.9535
0.77	11.4754	1520.19	11.2903	604.16	14	1399.9	13.4615	597.81	9.21053	783.24	15.5556	1722.3	14.5833	849.02	19.4444	1085.96	15.5556	2511.32	11.8644	551.01	15.9091	2056.29	11.4754	701.64	11.8644	710	14.5833	1859.01	14.8936	1524.33	11.1111	1829.35	14.8936	670.89	11.4754	1169.17	12.2807	2200.55	11.6667	1345.92	14.2857	726.56	10.4478	1005.98	15.2174	1602.58	17.9487	1683.91	16.2791
0.88	13.1148	1741.21	12.9032	691.96	16	1659.35	15.3846	722.87	10.5263	971.12	17.7778	2068.84	16.6667	934.51	22.2222	1138.11	17.7778	3188.37	13.5593	642.49	18.1818	2232.21	13.1148	762.4	13.5593	817.88	16.6667	2240.8	17.0213	1775.59	12.6984	1683.8	17.0213	851.93	13.1148	1416.8	14.0351	2599.56	13.3333	1697.22	16.3265	846.32	11.9403	1298.16	17.3913	1944.64	20.5128	2050.6	18.6047
0.99	14.7541	2015.74	14.5161	823.84	18	1815.07	17.3077	905.37	11.8421	1162.32	20	2488.09	18.75	867.57	25	1171.06	20	3556.03	15.2542	758.56	20.4545	2236.59	14.7541	863.88	15.2542	1008.25	18.75	2459.16	19.1489	2100.26	14.2857	1706.52	19.1489	1023.35	14.7541	1662.24	15.7895	2937.72	15	1915.12	18.3673	998.54	13.4328	1537.76	19.5652	2320.68	23.0769	2359.47	20.9302
1.1	16.3934	2227.9	16.129	997	20	1977.62	19.2308	1217.62	13.1579	1419.83	22.2222	2875.84	20.8333	781.44	27.7778	1251.4	22.2222	3614.6	16.9492	898.69	22.7273	2187.78	16.3934	994.03	16.9492	1245.67	20.8333	2415	21.2766	2424.01	15.873	1848.53	21.2766	1229.17	16.3934	1912.67	17.5439	3017.52	16.6667	2208.15	20.4082	1099.25	14.9254	1907.69	21.7391	2600.96	25.641	2683.99	23.2558
1.21	18.0328	2418.9	17.7419	1305.24	22	2322.17	21.1538	1596.62	14.4737	1640.54	24.4444	3265.1	22.9167	735.31	30.5556	1470.11	24.4444	3591.86	18.6441	1031.5	25	2102.37	18.0328	1169.55	18.6441	1470.08	22.9167	2297.53	23.4043	2659.43	17.4603	1992.17	23.4043	1506.3	18.0328	2099.9	19.2982	3277.43	18.3333	2583.74	22.449	1255.88	16.4179	2276.18	23.913	2886.22	28.2051	3079.18	25.5814
1.32	19.6721	2823.91	19.3548	1668.68	24	2771.8	23.0769	1982.6	15.7895	1800.38	26.6667	3629.59	25	764.43	33.3333	1793.56	26.6667	3610.33	20.339	1230.54	27.2727	2078.84	19.6721	1360.37	20.339	1673.82	25	2054.95	25.5319	2841.48	19.0476	2192.78	25.5319	1800.88	19.6721	2266.33	21.0526	3546.22	20	2973.4	24.4898	1396.98	17.9104	2600.88	26.087	3048.08	30.7692	3309.54	27.907
1.43	21.3115	3287.58	20.9677	1990.32	26	2872.27	25	2352.37	17.1053	1916.32	28.8889	4062.88	27.0833	900.48	36.1111	1969.32	28.8889	3607.43	22.0339	1469.09	29.5455	1992.4	21.3115	1503.74	22.0339	1989	27.0833	1764.95	27.6596	2957.32	20.6349	2335.33	27.6596	2058.01	21.3115	2456.27	22.807	3942.57	21.6667	3075.38	26.5306	1624.46	19.403	3030.94	28.2609	3114.63	33.3333	3456.92	30.2326
1.54	22.9508	3446.26	22.5806	2171.04	28	2821.84	26.9231	2787.3	18.4211	2044.37	31.1111	4277.56	29.1667	1181.65	38.8889	1955.19	31.1111	3382.47	23.7288	1769.38	31.8182	1902.7	22.9508	1573.15	23.7288	2244.11	29.1667	1398.55	29.7872	2836.25	22.2222	2398.61	29.7872	2297.89	22.9508	2644.37	24.5614	4481.12	23.3333	3023.7	28.5714	1941.88	20.8955	3352.24	30.4348	3043.14	35.8974	3445.79	32.5581
1.65	24.5902	3386.18	24.1935	2296	30	2623.52	28.8462	2855.43	19.7368	2144.56	33.3333	4413.21	31.25	1738.38	41.6667	1709.14	33.3333	3110.31	25.4237	1942.73	34.0909	1783.25	24.5902	1624.84	25.4237	2528.85	31.25	1173.55	31.9149	2565.78	23.8095	2324.16	31.9149	2514.34	24.5902	2804.23	26.3158	4801.4	25	2896.65	30.6122	2359.98	22.3881	3542.58	32.6087	2725.55	38.4615	3402.77	34.8837
1.76	26.2295	3320.07	25.8065	2089.84	32	2561.73	30.7692	2630.22	21.0526	2185.1	35.5556	4361.22	33.3333	2224.59	44.4444	1330.26	35.5556	2865.86	27.1186	2070.71	36.3636	1679.03	26.2295	1567.58	27.1186	2823.47	33.3333	949.97	34.0426	2281.25	25.3968	2129.12	34.0426	2592.22	26.2295	2872.46	28.0702	4702.27	26.6667	2648.57	32.6531	2671.22	23.8806	3645.05	34.7826	2211.94	41.0256	2919.68	37.2093
1.87	27.8689	3073.55	27.4194	1857.76	34	2523.78	32.6923	2235.65	22.3684	2189.88	37.7778	3906.33	35.4167	2666.21	47.2222	1017.88	37.7778	2499.3	28.8136	2110.09	38.6364	1552.09	27.8689	1494.08	28.8136	2954.34	35.4167	797.84	36.1702	2074.16	26.9841	1978.27	36.1702	2563.72	27.8689	2819.29	29.8246	4437.78	28.3333	2304.04	34.6939	2793.25	25.3731	3626.36	36.9565	1725.97	43.5897	2351.01	39.5349
1.98	29.5082	2619.31	29.0323	1616.76	36	2319.51	34.6154	1877.11	23.6842	2179.34	40	3390.01	37.5	2849.8	50	792.55	40	2140.53	30.5085	2029.26	40.9091	1407.54	29.5082	1446.83	30.5085	2958.67	37.5	654.71	38.2979	1797.43	28.5714	1910.97	38.2979	2450.47	29.5082	2693.12	31.5789	4203.38	30	2042.42	36.7347	2724.08	26.8657	3618.62	39.1304	1290.47	46.1538	1718.85	41.8605
2.09	31.1475	2054.56	30.6452	1463.72	38	1988.07	36.5385	1678.06	25	2143.07	42.2222	2905.7	39.5833	2869.63	52.7778	634.4	42.2222	1884.25	32.2034	2073.94	43.1818	1218.11	31.1475	1424.17	32.2034	2885.22	39.5833	546.49	40.4255	1504.4	30.1587	1699.55	40.4255	2266.52	31.1475	2377.13	33.3333	4096.34	31.6667	1787.68	38.7755	2422.98	28.3582	3745.11	41.3043	1034.72	48.7179	1279.42	44.186
2.2	32.7869	1520.87	32.2581	1371	40	1559.15	38.4615	1557.13	26.3158	2069.35	44.4444	2348.17	41.6667	2758.71	55.5556	520.33	44.4444	1609.36	33.8983	2144.88	45.4545	1085.8	32.7869	1333.85	33.8983	2634.08	41.6667	487.7	42.5532	1146.28	31.746	1444.97	42.5532	2106.69	32.7869	2079.06	35.0877	4139.96	33.3333	1497.76	40.8163	2133.75	29.8507	3619.16	43.4783	786.23	51.2821	994.12	46.5116
2.31	34.4262	1141.33	33.871	1392.77	42	1150.88	40.3846	1415.94	27.6316	1967.06	46.6667	1740.21	43.75	2557.52	58.3333	449.37	46.6667	1365.26	35.5932	2094.37	47.7273	981.82	34.4262	1164.94	35.5932	2287.96	43.75	434.4	44.6809	890.34	33.3333	1098.54	44.6809	1910.01	34.4262	1888.54	36.8421	3538.3	35	1256.48	42.8571	1776.91	31.3433	3543.02	45.6522	640.01	53.8462	774.71	48.8372
2.42	36.0656	837.02	35.4839	1428.23	44	875.72	42.3077	1251.47	28.9474	1961.27	48.8889	1265.75	45.8333	2410.54	61.1111	429.16	48.8889	1218.15	37.2881	1958.14	50	875.72	36.0656	1059.94	37.2881	1963.57	45.8333	402.97	46.8085	690.54	34.9206	866.56	46.8085	1617.23	36.0656	1732.68	38.5965	2906.86	36.6667	1009.96	44.898	1572.08	32.8358	3128.03	47.8261	548.11	56.4103	624.43	51.1628
2.53	37.7049	645.43	37.0968	1499.2	46	665.75	44.2308	1189.73	30.2632	1925.62	51.1111	958.18	47.9167	2042.34	63.8889	408.77	51.1111	971.42	38.9831	1817.78	52.2727	792.53	37.7049	947.82	38.9831	1619.04	47.9167	382.04	48.9362	565.67	36.5079	714.78	48.9362	1355.59	37.7049	1529.05	40.3509	2126.24	38.3333	788.07	46.9388	1389.93	34.3284	2547.18	50	467.2	58.9744	518.6	53.4884
2.64	39.3443	514.05	38.7097	1541.25	48	530.39	46.1538	1040.05	31.5789	1666.79	53.3333	714.09	50	1605.38	66.6667	379.99	53.3333	837.91	40.678	1593.39	54.5455	661.69	39.3443	807.21	40.678	1299.79	50	357.03	51.0638	527.26	38.0952	626.9	51.0638	1038.32	39.3443	1261.7	42.1053	1394	40	646.27	48.9796	1187.94	35.8209	1999.05	52.1739	405.58	61.5385	431.41	55.814
2.75	40.9836	450.82	40.3226	1557.44	50	482.92	48.0769	912.71	32.8947	1426.93	55.5556	608.49	52.0833	1209.38	69.4444	374.36	55.5556	682.6	42.3729	1442.58	56.8182	588.45	40.9836	706.14	42.3729	1124.24	52.0833	340.47	53.1915	447.62	39.6825	544.53	53.1915	774.58	40.9836	932.24	43.8596	911.73	41.6667	548.58	51.0204	1045.37	37.3134	1601.41	54.3478	353.82	64.1026	397.95	58.1395
2.86	42.623	424.73	41.9355	1536.87	52	443.47	50	780.85	34.2105	1170.63	57.7778	513.27	54.1667	926.24	72.2222	377.09	57.7778	572.21	44.0678	1282.57	59.0909	517.48	42.623	600.28	44.0678	948	54.1667	329.17	55.3191	418.1	41.2698	509.64	55.3191	619.89	42.623	657.48	45.614	663.78	43.3333	476.02	53.0612	921.09	38.806	1290.33	56.5217	334.58	66.6667	372.9	60.4651
2.97	44.2623	401.09	43.5484	1449.52	54	401.46	51.9231	676.27	35.5263	995.8	60	456.2	56.25	712.01	75	362.73	60	479.46	45.7627	1089.14	61.3636	464.3	44.2623	527.29	45.7627	919	56.25	319.04	57.4468	396.2	42.8571	431.79	57.4468	492.95	44.2623	522.09	47.3684	528.95	45	433.91	55.102	812.19	40.2985	1020.79	58.6957	330.41	69.2308	340.65	62.7907
3.08	45.9016	372.83	45.1613	1350.98	56	363.12	53.8462	552.58	36.8421	818.33	62.2222	423.42	58.3333	570.63	77.7778	338.09	62.2222	404.82	47.4576	893.28	63.6364	428.45	45.9016	453.67	47.4576	785	58.3333	312.87	59.5745	368.67	44.4444	391.85	59.5745	431.7	45.9016	440.65	49.1228	436.14	46.6667	383.48	57.1429	722.67	41.791	829.19	60.8696	317.88	71.7949	322.3	65.1163
3.19	47.541	350.78	46.7742	1269.75	58	339.47	55.7692	534	38.1579	682.9	64.4444	410.68	60.4167	494.52	80.5556	320.25	64.4444	361.32	49.1525	702.1	65.9091	401.38	47.541	434.86	49.1525	763	60.4167	299.1	61.7021	353.1	46.0317	367.43	61.7021	395.41	47.541	398.55	50.8772	405.16	48.3333	358.89	59.1837	625.76	43.2836	696.06	63.0435	290	74.359	313.59	67.4419
3.3	49.1803	349.33	48.3871	1093.04	60	312.86	57.6923	508.37	39.4737	516.6	66.6667	387.56	62.5	443.72	83.3333	312.31	66.6667	326.23	50.8475	565.85	68.1818	377.78	49.1803	394.76	50.8475	730	62.5	293.29	63.8298	341.17	47.619	350.65	63.8298	359.19	49.1803	362.89	52.6316	363.54	50	363.55	61.2245	567.96	44.7761	605.4	65.2174	296.68	76.9231	309.07	69.7674
3.41	50.8197	330.09	50	812.97	62	303.03	59.6154	468.81	40.7895	448.33	68.8889	388.16	64.5833	416.23	86.1111	303	68.8889	306.81	52.5424	471.6	70.4545	342.95	50.8197	359.78	52.5424	678	64.5833	288.08	65.9574	327.86	49.2063	336.18	65.9574	322	50.8197	328.35	54.386	355.42	51.6667	354.5	63.2653	459.69	46.2687	522.84	67.3913	304.6	79.4872	294.22	72.093
3.52	52.459	326.42	51.6129	584.61	64	291.01	61.5385	431.56	42.1053	401.28	71.1111	391.5	66.6667	413.05	88.8889	299.55	71.1111	306.32	54.2373	411.81	72.7273	325.14	52.459	342.45	54.2373	542	66.6667	272.29	68.0851	326.68	50.7937	304.71	68.0851	299.59	52.459	310.91	56.1404	342.72	53.3333	338.73	65.3061	391.73	47.7612	473.18	69.5652	288.32	82.0513	274.82	74.4186
3.63	54.0984	291.56	53.2258	461.54	66	280.41	63.4615	403.16	43.4211	346.66	73.3333	407.52	68.75	392.55	91.6667	300.74	73.3333	292.23	55.9322	372.72	75	306.65	54.0984	327.73	55.9322	485	68.75	261.79	70.2128	309.32	52.381	284.59	70.2128	295.07	54.0984	294.22	57.8947	327.26	55	292.84	67.3469	355.58	49.2537	439.64	71.7391	265.61	84.6154	276.79	76.7442
3.74	55.7377	286.48	54.8387	388.99	68	275.25	65.3846	385.62	44.7368	335.77	75.5556	437.28	70.8333	350.14	94.4444	307.1	75.5556	293.87	57.6271	342.84	77.2727	292.13	55.7377	321.65	57.6271	435.14	70.8333	264.22	72.3404	299.66	53.9683	275.14	72.3404	281.3	55.7377	282.95	59.6491	328.21	56.6667	270.68	69.3878	314.36	50.7463	400.99	73.913	254.63	87.1795	267.98	79.0698
3.85	57.377	267.19	56.4516	345.21	70	273.97	67.3077	361.91	46.0526	319.72	77.7778	437.03	72.9167	335.18	97.2222	314.08	77.7778	286.31	59.322	319.33	79.5455	277.84	57.377	305.2	59.322	403.91	72.9167	259.9	74.4681	290.67	55.5556	269.02	74.4681	269.66	57.377	276.7	61.4035	300.29	58.3333	258.87	71.4286	305.92	52.2388	358.08	76.087	251.89	89.7436	270.64	81.3953
3.96	59.0164	266.58	58.0645	312.88	72	273.44	69.2308	341.13	47.3684	318.38	80	424.47	75	337.41	100	311.99	80	291.58	61.0169	316.6	81.8182	261.12	59.0164	302.23	61.0169	374.8	75	246.48	76.5957	280.81	57.1429	267.13	76.5957	262.72	59.0164	264.79	63.1579	309.53	60	258.44	73.4694	300.95	53.7313	358.1	78.2609	257.69	92.3077	255.48	83.7209
4.07	60.6557	264.86	59.6774	317.92	74	258.27	71.1538	344.62	48.6842	299.15	82.2222	410.39	77.0833	318.8			82.2222	292.09	62.7119	326.35	84.0909	263.93	60.6557	295.26	62.7119	346.9	77.0833	237.47	78.7234	283.8	58.7302	248.94	78.7234	266.83	60.6557	256.76	64.9123	303.55	61.6667	247.72	75.5102	289.62	55.2239	329.54	80.4348	248.7	94.8718	251.1	86.0465
4.18	62.2951	251.51	61.2903	310.72	76	234.8	73.0769	329.64	50	287.23	84.4444	392.59	79.1667	287.3			84.4444	285.1	64.4068	308.96	86.3636	254.32	62.2951	275.24	64.4068	301.8	79.1667	237.53	80.8511	275.72	60.3175	246.02	80.8511	257.03	62.2951	249.21	66.6667	296.02	63.3333	250.73	77.551	289.69	56.7164	319.65	82.6087	259.98	97.4359	242.69	88.3721
4.29	63.9344	252.23	62.9032	275.59	78	252.38	75	321.76	51.3158	277.76	86.6667	375.43	81.25	274.83			86.6667	286.61	66.1017	290.06	88.6364	250.08	63.9344	275.87	66.1017	296.07	81.25	236.45	82.9787	272.18	61.9048	241.33	82.9787	247.16	63.9344	240.35	68.4211	278.45	65	252.39	79.5918	290.88	58.209	317.56	84.7826	258.54	100	244.95	90.6977
4.4	65.5738	246.88	64.5161	262.57	80	254.4	76.9231	311.93	52.6316	259.47	88.8889	345.78	83.3333	277.13			88.8889	272.62	67.7966	286.54	90.9091	248.2	65.5738	270.89	67.7966	299.26	83.3333	235.53	85.1064	268.7	63.4921	241.6	85.1064	262.37	65.5738	237.34	70.1754	255.87	66.6667	245.71	81.6327	286.95	59.7015	319.26	86.9565	266.23			93.0233
4.51	67.2131	255.42	66.129	254.02	82	256.38	78.8462	308.57	53.9474	270.54	91.1111	335.03	85.4167	267.64			91.1111	258.31	69.4915	306.15	93.1818	233.46	67.2131	265.42	69.4915	277.03	85.4167	246.69	87.234	263.87	65.0794	242.42	87.234	245.64	67.2131	241.93	71.9298	248.43	68.3333	235.12	83.6735	294.35	61.194	309.07	89.1304	279.8			95.3488
4.62	68.8525	249.44	67.7419	264.99	84	240.4	80.7692	298.6	55.2632	263.63	93.3333	322.36	87.5	260.05			93.3333	243.58	71.1864	281.13	95.4545	249	68.8525	257.6	71.1864	272.69	87.5	241.72	89.3617	264.55	66.6667	228.26	89.3617	244.48	68.8525	236.94	73.6842	250.85	70	239.84	85.7143	276.61	62.6866	302.39	91.3043	314.38			97.6744
4.73	70.4918	241.96	69.3548	257.65	86	239.52	82.6923	289.78	56.5789	252.82	95.5556	311.42	89.5833	261.91			95.5556	248.77	72.8814	275.23	97.7273	247.6	70.4918	256.71	72.8814	269.31	89.5833	229.53	91.4894	259.13	68.254	219.11	91.4894	243.46	70.4918	221.53	75.4386	257.53	71.6667	249.77	87.7551	289.31	64.1791	290.45	93.4783	358.14			100
4.84	72.1311	240.91	70.9677	253.9	88	226.49	84.6154	269.76	57.8947	264.32	97.7778	289.9	91.6667	270.79			97.7778	259.32	74.5763	273	100	240.93	72.1311	257.25	74.5763	266.75	91.6667	235.59	93.617	251.35	69.8413	212.48	93.617	233.93	72.1311	226.25	77.193	251.69	73.3333	272.75	89.7959	303.06	65.6716	280.12	95.6522	398.91
4.95	73.7705	224.64	72.5806	236.84	90	227.27	86.5385	266.25	59.2105	258.83	100	277.75	93.75	272.32			100	252.31	76.2712	267.16			73.7705	260.69	76.2712	260.25	93.75	231.33	95.7447	265.24	71.4286	222.82	95.7447	225.47	73.7705	235.53	78.9474	246.17	75	271.72	91.8367	308.93	67.1642	275.16	97.8261	428.82
5.06	75.4098	222.33	74.1935	239.4	92	225.77	88.4615	269.71	60.5263	245.12			95.8333	259.25					77.9661	255.89			75.4098	251.74	77.9661	273.18	95.8333	219.94	97.8723	262.31	73.0159	224.12	97.8723	217.97	75.4098	235.74	80.7018	253.44	76.6667	281.02	93.8776	320.22	68.6567	270.97	100	456.11
5.17	77.0492	225.73	75.8065	223.22	94	221.15	90.3846	268.35	61.8421	232.84			97.9167	257.79					79.661	249.7			77.0492	243.66	79.661	250.65	97.9167	221.65	100	251.99	74.6032	220.55	100	221.03	77.0492	227.09	82.4561	248.5	78.3333	294.2	95.9184	346.3	70.1493	262.69
5.28	78.6885	216.25	77.4194	222.05	96	219.53	92.3077	264.93	63.1579	240.53			100	242.69					81.3559	248.65			78.6885	227.04	81.3559	253.11	100	219.17			76.1905	220.55			78.6885	221.18	84.2105	242.53	80	308.67	97.9592	350.74	71.6418	269.01
5.39	80.3279	217.86	79.0323	218.95	98	224.27	94.2308	256.1	64.4737	226.8									83.0508	241.57			80.3279	222.08	83.0508	254.76					77.7778	218.91			80.3279	226.76	85.9649	249.39	81.6667	302.8	100	378.11	73.1343	266.94
5.5	81.9672	225.01	80.6452	224.37	100	220.62	96.1538	235.03	65.7895	230.2									84.7458	235.65			81.9672	225.81	84.7458	248.13					79.3651	204.82			81.9672	225.11	87.7193	251.21	83.3333	282.69			74.6269	248.53
5.61	83.6066	204.52	82.2581	222.54			98.0769	232.46	67.1053	225.83									86.4407	213.13			83.6066	230.97	86.4407	245.13					80.9524	210.8			83.6066	219.6	89.4737	248.24	85	276.58			76.1194	239.05
5.72	85.2459	215.89	83.871	223.34			100	225.35	68.4211	220.81									88.1356	215.1			85.2459	230.62	88.1356	246.89					82.5397	206.72			85.2459	213	91.2281	256.48	86.6667	257.1			77.6119	231.09
5.83	86.8852	217.02	85.4839	226.19					69.7368	222.39									89.8305	222.02			86.8852	229.01	89.8305	242.49					84.127	211.35			86.8852	206.39	92.9825	255.85	88.3333	232.65			79.1045	240.63
5.94	88.5246	216.78	87.0968	224.06					71.0526	229.36									91.5254	228.86			88.5246	224.74	91.5254	242.39					85.7143	220.28			88.5246	209.66	94.7368	253.4	90	233.95			80.597	232.47
6.05	90.1639	224.17	88.7097	223.35					72.3684	221.72									93.2203	235.67			90.1639	227.45	93.2203	235.77					87.3016	209.59			90.1639	209.46	96.4912	245.66	91.6667	227.92			82.0896	217.51
6.16	91.8033	226.99	90.3226	224.52					73.6842	219.39									94.9153	234.22			91.8033	231.84	94.9153	235.49					88.8889	233.7			91.8033	203.93	98.2456	234.05	93.3333	229.43			83.5821	220.06
6.27	93.4426	212.19	91.9355	218.93					75	222.19									96.6102	242.2			93.4426	226.48	96.6102	235.77					90.4762	219.84			93.4426	208.02	100	226.39	95	235.21			85.0746	222.55
6.38	95.082	209.91	93.5484	217.71					76.3158	220.24									98.3051	244.08			95.082	223.16	98.3051	233.47					92.0635	221.84			95.082	209.26			96.6667	227.58			86.5672	215.78
6.49	96.7213	211.69	95.1613	220.14					77.6316	221.11									100	232.98			96.7213	229.32	100	227.43					93.6508	226.21			96.7213	200.27			98.3333	223.02			88.0597	222.21
6.6	98.3607	206.71	96.7742	215.7					78.9474	233.85													98.3607	226.05							95.2381	219.24			98.3607	202.95			100	232.21			89.5522	222.67
6.71	100	204.84	98.3871	210.8					80.2632	232.88													100	226.07							96.8254	214.4			100	203.45							91.0448	235.33
6.82			100	212.49					81.5789	225.47																					98.4127	223.37											92.5373	237.23
6.93									82.8947	218.45																					100	228.65											94.0299	236.08
7.04									84.2105	232.82																																	95.5224	246.73
7.15									85.5263	225.5																																	97.0149	260
7.26									86.8421	216.28																																	98.5075	263.8
7.37									88.1579	216.49																																	100	268.21
7.48									89.4737	217.56
7.59									90.7895	221.28
7.7									92.1053	223.54
7.81									93.4211	231.87
7.92									94.7368	231.74
8.03									96.0526	233.5
8.14									97.3684	236.12
8.25									98.6842	231.9
8.36									100	224.78
8.47
8.58
8.69
	0		0		0		0		0		0		0		0		0		0		0		0		0		0		0		0		0		0		0		0		0		0		0		0		0
	5	720.553	5	450.28	5	396.28	5	388.127	5	375.25	5	606.443	5	346.453	5	462.82	5	554.95	5	359.243	5	530.337	5	410.41	5	381.757	5	957.307	5	671.987	5	1708.06	5	529.093	5	551.505	5	542.59	5	488.155	5	334.62	5	475.012	5	637.39	5	479.655	5
	10	1202.53	10	533.72	10	638.067	10	431.943	10	603.388	10	905.295	10	443.96	10	587.175	10	773.09	10	393.947	10	907.76	10	569.81	10	509.277	10	1163.95	10	992.465	10	2309.63	10	476.665	10	850.42	10	967.29	10	780.168	10	437.76	10	694.59	10	829.09	10	637.91	10
	15	1759.05	15	706.653	15	1077.91	15	553.58	15	1298.45	15	1263.41	15	696.767	15	828.075	15	1502.08	15	553.203	15	1546.37	15	775.973	15	719.747	15	1580.58	15	1370.64	15	1739.89	15	587.937	15	1416.07	15	2129.74	15	1501.85	15	621.633	15	1437.4	15	1186.38	15	948.155	15
	20	2490.24	20	1323.64	20	1817.35	20	948.62	20	1976.41	20	2093.08	20	901.04	20	1067.67	20	3085.24	20	896.25	20	2144.25	20	1174.65	20	1241.33	20	2349.98	20	1937.93	20	2011.16	20	937.64	20	2092.97	20	3077.56	20	2420.1	20	922.43	20	2636	20	1955.97	20	1515.39	20
	25	3373.34	25	2152.45	25	2357.2	25	1977.2	25	2174.35	25	2876.34	25	760.393	25	1154.59	25	3587.5	25	1489.67	25	2175.58	25	1567.24	25	1968.98	25	2255.83	25	2541.72	25	2352.7	25	1367.74	25	2634.96	25	3989.97	25	2992.28	25	1250.7	25	3513.29	25	2743.59	25	2205.03	25
	30	3004.31	30	1854.79	30	2772.54	30	2665.03	30	2035.19	30	3846.24	30	948.853	30	1211.23	30	3608.88	30	2041.18	30	2057.87	30	1502.83	30	2768.89	30	1739.48	30	2878.35	30	2006.12	30	2052.26	30	2794.96	30	4647.15	30	2472.92	30	1783.17	30	3652.31	30	3081.36	30	2881.59	30
	35	1572.25	35	1409.16	35	2569.68	35	2247.66	35	1547.49	35	4345.39	35	1981.49	35	1631.84	35	3246.39	35	2082.69	35	1842.97	35	1307.65	35	2825.99	35	1061.76	35	2423.52	35	1277.4	35	2553.28	35	2114.91	35	4149.86	35	1646.09	35	2608.15	35	3072.74	35	2660.21	35	3383.23	35
	40	665.5	40	1489.56	40	1955.58	40	1617.6	40	753.408	40	3885.85	40	2795.21	40	1962.26	40	2501.9	40	1956.76	40	1615.56	40	938.323	40	1956.86	40	666.347	40	1935.8	40	628.737	40	2507.09	40	1507.81	40	3528.37	40	925.195	40	2573.53	40	1630.26	40	1508.22	40	3424.28	40
	45	425.547	45	1514.61	45	1195.25	45	1285.71	45	383.01	45	2881.29	45	2658.11	45	1519.7	45	1878.05	45	1439.51	45	1312.82	45	611.237	45	1124.01	45	461.05	45	1180.34	45	444.427	45	2094.41	45	703.937	45	1477.32	45	526.195	45	1827.58	45	787.86	45	910.475	45	2635.35	45
	50	357.647	50	1131.68	50	559.687	50	911.203	50	306.12	50	1502.98	50	2019.42	50	905.215	50	1291.7	50	894.84	50	981.113	50	427.763	50	822.333	50	380.68	50	628.105	50	351.42	50	1486.41	50	400.697	50	542.957	50	384.958	50	1288.93	50	478.553	50	551.773	50	1499.13	50
	55	316.023	55	562.027	55	442.617	55	669.9	55	273.75	55	836.135	55	1247	55	713.475	55	904.665	55	483.087	55	776.647	55	343.32	55	650	55	342.223	55	487.44	55	288.147	55	906.45	55	311.16	55	374.707	55	337.405	55	983.23	55	372.39	55	408.867	55	884.415	55
	60	273.417	60	325.337	60	338.483	60	503.727	60	259.9	60	525.987	60	641.32	60	484.85	60	578.09	60	344.963	60	552.965	60	309.693	60	441.35	60	315.955	60	394.323	60	261.697	60	514.847	60	274.813	60	332.73	60	270.207	60	720.207	60	321.502	60	332.495	60	571.515	60
	65	256.2	65	282.96	65	302.3	65	417.36	65	236.322	65	430.1	65	451.49	65	418.965	65	415.2	65	317.303	65	446.375	65	282.123	65	341.167	65	293.49	65	347.135	65	242.983	65	377.3	65	248.773	65	304.457	65	252.32	65	513.825	65	300.637	65	303.94	65	414.68	65
	70	250.58	70	258.887	70	276.543	70	362.887	70	224.807	70	387.86	70	402.8	70	377.175	70	316.52	70	294.25	70	389.58	70	264.637	70	290.787	70	267.04	70	327.27	70	225.567	70	310.795	70	238.737	70	287.235	70	243.265	70	353.89	70	275.417	70	296.533	70	356.775	70
	75	235.837	75	243.38	75	268.56	75	332.007	75	223.165	75	399.51	75	340.91	75	369.91	75	299.275	75	276.453	75	324.913	75	258.217	75	269.583	75	256.867	75	299.883	75	222.497	75	282.01	75	227.77	75	251.717	75	258.52	75	303.435	75	261.793	75	260.12	75	317.945	75
	80	221.437	80	221.407	80	247.193	80	314.087	80	224.347	80	432.927	80	314.503	80	350.41	80	290.587	80	257.583	80	292.207	80	240.813	80	261.36	80	240.493	80	282.305	80	214.76	80	264.775	80	228.003	80	251.797	80	288.903	80	290.063	80	236.923	80	254.79	80	301.645	80
	85	215.797	85	223.417	85	250.393	85	286.047	85	227.405	85	409.15	85	275.98	85	316.28	85	289.59	85	241.957	85	262.525	85	226.287	85	252	85	235.99	85	273.95	85	209.623	85	252.095	85	223.823	85	248.157	85	292.685	85	290.65	85	223.347	85	255.74	85	275.805	85
	90	216.563	90	224.533	90	231.093	90	267.98	90	218.957	90	360.605	90	263.2	90	301.275	90	279.615	90	216.75	90	252.2	90	228.123	90	244.837	90	239.313	90	265.707	90	221.19	90	250.83	90	209.683	90	249.613	90	250.07	90	289.66	90	220.803	90	273.015	90	269.31	90
	95	221.117	95	220.387	95	224.73	95	263.127	95	227.108	95	328.695	95	271.555	95	303.92	95	250.945	95	232.917	95	240.83	95	228.59	95	237.883	95	233.46	95	255.24	95	222.63	95	238.695	95	207.137	95	255.243	95	231.627	95	314.575	95	236.213	95	336.26	95	253.29	95
	100	208.288	100	214.782	100	221.473	100	230.947	100	231.575	100	293.023	100	253.243	100	313.035	100	253.467	100	239.753	100	245.843	100	226.15	100	232.223	100	220.253	100	259.847	100	221.415	100	221.49	100	203.983	100	235.367	100	229.505	100	358.383	100	259.685	100	427.947	100	243.82	100
[truncated: 15 more columns]

## Sheet: IF Binned
49B	3	IF	4	IF	6	IF	7	IF	13	IF	14	IF	15	IF	16	IF	17	IF	18	IF	19	IF	23	IF	26	IF	27	IF	28	IF	29	IF	31	IF	32	IF	33	IF	37	IF	38	IF	39	IF	45	IF	46A	IF	46B
X	X	Y	X	Y	X	Y	X	Y	X	Y	X	Y	X	Y	X	Y	X	Y	X	Y	X	Y	X	Y	X	Y	X	Y	X	Y	X	Y	X	Y	X	Y	X	Y	X	Y	X	Y	X	Y	X	Y	X	Y	X
0	0	16000	0	16912	0	12736	0	17680	0	11440	0	17072	0	19056	0	27952	0	23168	0	12912	0	15632	0	14208	0	24896	0	17872	0	13664	0	14848	0	9952	0	15744	0	15760	0	13168	0	25312	0	26016	0	16080	0	27424	0
0.11	2.7027	17775.1	1.88679	17694.1	2.22222	11665.7	3.22581	16917.8	1.49254	11056	2.5	17515.3	3.57143	18816	3.33333	28560	3.7037	22586	2.08333	12006	2.5	15333.8	1.92308	13332.7	2.63158	23933.3	2.5	20803.8	2.38095	13478.8	2.5	13776	2.7027	10792.5	2.32558	15291.7	2.7027	17960.8	2.12766	14295.4	2.32558	24464.5	1.81818	26236.3	2.5	16421.5	3.0303	25116.5	3.44828
0.22	5.40541	17455.8	3.77358	18027.5	4.44444	10867.6	6.45161	15232.6	2.98507	10207	5	17163.6	7.14286	17104	6.66667	27920	7.40741	20947.6	4.16667	10832.5	5	14614.7	3.84615	12721.7	5.26316	22806.7	5	21559.4	4.7619	12536.1	5	12672	5.40541	10216.1	4.65116	15048	5.40541	17964.5	4.25532	12522.6	4.65116	23776.7	3.63636	25086.7	5	15587.4	6.06061	23956.8	6.89655
0.33	8.10811	14728.3	5.66038	17317.1	6.66667	10408.5	9.67742	15034.3	4.47761	10167.4	7.5	17217.1	10.7143	15232	10	28032	11.1111	18863.1	6.25	9839.32	7.5	12185.7	5.76923	11904.8	7.89474	21399.7	7.5	19827.6	7.14286	10818.2	7.5	12208	8.10811	9002.42	6.97674	13325.6	8.10811	16949.3	6.38298	10170.5	6.97674	23470.7	5.45455	22166	7.5	13947.4	9.09091	23314.4	10.3448
0.44	10.8108	12165.1	7.54717	15887.4	8.88889	8725.99	12.9032	14157.2	5.97015	9594.58	10	15217.5	14.2857	14144	13.3333	24352	14.8148	16656.6	8.33333	8400.71	10	9703.31	7.69231	10732.2	10.5263	19387.5	10	18770.8	9.52381	9985.01	10	12624	10.8108	7765.8	9.30233	11911	10.8108	15859.5	8.51064	8135.79	9.30233	24435.6	7.27273	17542.5	10	11869.9	12.1212	21304.5	13.7931
0.55	13.5135	11483.5	9.43396	15472	11.1111	7542.74	16.129	14401.8	7.46269	7888.36	12.5	15095	17.8571	12432	16.6667	22448	18.5185	14823.8	10.4167	7322.77	12.5	8246.65	9.61538	9069.38	13.1579	19001	12.5	18075	11.9048	9104.85	12.5	11776	13.5135	6726.99	11.6279	10954.2	13.5135	15227.9	10.6383	7536.48	11.6279	23786.1	9.09091	14490.4	12.5	10664.7	15.1515	19762.3	17.2414
0.66	16.2162	11286.8	11.3208	14867.8	13.3333	6622.54	19.3548	14726.6	8.95522	7177.07	15	14837.1	21.4286	12080	20	20832	22.2222	13448.6	12.5	6685.42	15	7343.73	11.5385	8616.03	15.7895	18630.7	15	17062.9	14.2857	8272.13	15	11584	16.2162	6404.29	13.9535	9581.7	16.2162	16535	12.766	7484.85	13.9535	24182.1	10.9091	13413.8	15	9806.73	18.1818	18376.9	20.6897
0.77	18.9189	11775.6	13.2075	14642.6	15.5556	6179.63	22.5806	14893.2	10.4478	7250.65	17.5	14108.4	25	12704	23.3333	18672	25.9259	13104	14.5833	6466.6	17.5	7332.18	13.4615	8013.89	18.4211	19761.2	17.5	15383.1	16.6667	7843.91	17.5	10486.6	18.9189	5981.94	16.2791	8522.78	18.9189	17216.3	14.8936	7181.07	16.2791	25460.5	12.7273	12935	17.5	9802.24	21.2121	17207.7	24.1379
0.88	21.6216	12434.1	15.0943	15079.7	17.7778	6296.17	25.8065	14736.9	11.9403	6893.69	20	13508.9	28.5714	13232	26.6667	18736	29.6296	12802.1	16.6667	6516.49	20	7842.09	15.3846	7300.23	21.0526	20579.5	20	14363.7	19.0476	7987.87	20	10075.1	21.6216	5649.67	18.6047	8281.12	21.6216	16890.9	17.0213	7750.69	18.6047	25286.4	14.5455	12716.5	20	10643.7	24.2424	16975.3	27.5862
0.99	24.3243	13116	16.9811	15320.3	20	6777.44	29.0323	14302.7	13.4328	6034.13	22.5	12927	32.1429	14272	30	19056	33.3333	12999.1	18.75	7059.13	22.5	8224.92	17.3077	6874.2	23.6842	22402.7	22.5	13556.1	21.4286	9610.24	22.5	9694.91	24.3243	5257.6	20.9302	8226.91	24.3243	15609.2	19.1489	8701.71	20.9302	25164.8	16.3636	13574.8	22.5	11198.8	27.2727	18407.8	31.0345
1.1	27.027	13284.8	18.8679	16352	22.2222	7247.57	32.2581	14512.1	14.9254	5692.41	25	12472.9	35.7143	13840	33.3333	20192	37.037	12805.2	20.8333	7631.19	25	8386.8	19.2308	6163.9	26.3158	25218.8	25	12641.1	23.8095	10104	25	9941.68	27.027	5358.9	23.2558	8462.82	27.027	14175.7	21.2766	8815.17	23.2558	24435	18.1818	13323.4	25	11843.2	30.303	20656.3	34.4828
1.21	29.7297	13591.2	20.7547	16321.3	24.4444	7248.87	35.4839	14588	16.4179	5562.69	27.5	11981.2	39.2857	12912	36.6667	20032	40.7407	12988.7	22.9167	7945.08	27.5	8528.54	21.1538	5715.72	28.9474	24608.3	27.5	12117.4	26.1905	10514.5	27.5	9232.58	29.7297	5351.48	25.5814	8788.27	29.7297	12392.4	23.4043	8402.2	25.5814	24958.5	20	14713.1	27.5	12109.3	33.3333	20252.3	37.931
1.32	32.4324	14373.7	22.6415	16170.2	26.6667	6809.45	38.7097	15293.4	17.9104	5299.32	30	12423.6	42.8571	13008	40	20848	44.4444	13014	25	7647.32	30	7849.88	23.0769	5268.2	31.5789	22423.9	30	11394	28.5714	9321.24	30	9039.6	32.4324	5658.57	27.907	9171.43	32.4324	11394.9	25.5319	7668.29	27.907	24633.6	21.8182	17091.8	30	11475.8	36.3636	18976.7	41.3793
1.43	35.1351	14399.9	24.5283	15397.1	28.8889	6090.25	41.9355	15466	19.403	5125.65	32.5	12337	46.4286	14640	43.3333	20128	48.1481	13352	27.0833	7228.09	32.5	7456.95	25	5532.52	34.2105	19515.6	32.5	11445	30.9524	8047.18	32.5	9314.02	35.1351	6249.73	30.2326	9580.2	35.1351	11418.6	27.6596	7237.45	30.2326	23999.3	23.6364	16985.1	32.5	10476.5	39.3939	18498.9	44.8276
1.54	37.8378	14756.6	26.4151	14139.5	31.1111	5408.53	45.1613	16967.6	20.8955	5285.84	35	11381.1	50	14976	46.6667	21408	51.8519	13224.9	29.1667	6717.49	35	7587.2	26.9231	5557.08	36.8421	17753	35	11983.8	33.3333	7135.97	35	9275.92	37.8378	6978.17	32.5581	10107.8	37.8378	11757.8	29.7872	6851.31	32.5581	23747.1	25.4545	15625.3	35	9457.48	42.4242	18964.9	48.2759
1.65	40.5405	14687.2	28.3019	12688	33.3333	4735.38	48.3871	15953.3	22.3881	5243.32	37.5	11412.3	53.5714	12741.1	50	19130.5	55.5556	12345.2	31.25	6483.13	37.5	7170.23	28.8462	5622.05	39.4737	16177.7	37.5	12929.4	35.7143	6883.38	37.5	9684.15	40.5405	7635.03	34.8837	9554.6	40.5405	11286.1	31.9149	6754.76	34.8837	23569.2	27.2727	13044.7	37.5	8909.1	45.4545	18869.6	51.7241
1.76	43.2432	14290.8	30.1887	12100.7	35.5556	5020.28	51.6129	13897.6	23.8806	4868.79	40	11945.1	57.1429	10958.6	53.3333	16994.2	59.2593	12248.7	33.3333	6269.87	40	6907.45	30.7692	6145.89	42.1053	16598.8	40	14211.7	38.0952	6959.69	40	9602.28	43.2432	7259.86	37.2093	9727.82	43.2432	10564.5	34.0426	7124.21	37.2093	24391.2	29.0909	11901.3	40	8677.99	48.4848	19218.2	55.1724
1.87	45.9459	13969.2	32.0755	11522.5	37.7778	4729.74	54.8387	12403.2	25.3731	4590.63	42.5	12278.5	60.7143	10555.4	56.6667	14997.9	62.963	12213.8	35.4167	6283.11	42.5	6646.53	32.6923	7022.55	44.7368	17831.7	42.5	14479	40.4762	7049.14	42.5	9323.56	45.9459	6811.92	39.5349	9238.1	45.9459	9802.24	36.1702	7433.73	39.5349	25746.5	30.9091	13110.4	42.5	8592.18	51.5152	19711.8	58.6207
1.98	48.6486	13158.4	33.9623	10791.2	40	4673.15	58.0645	11558.5	26.8657	4334.05	45	12759.5	64.2857	10163.2	60	14857.5	66.6667	12096.2	37.5	5423.9	45	6341.12	34.6154	7524.97	47.3684	17732.8	45	13621.9	42.8571	6987.38	45	8959.64	48.6486	5372.22	41.8605	8760.02	48.6486	9742.72	38.2979	8284.08	41.8605	24940.3	32.7273	13472	45	9310.5	54.5455	20844.1	62.069
2.09	51.3514	13478.8	35.8491	10540.6	42.2222	4713.05	61.2903	11602	28.3582	3951.95	47.5	13340.6	67.8571	9946.77	63.3333	14478.6	70.3704	11080.9	39.5833	5493.47	47.5	6010.99	36.5385	6863.68	50	19426.7	47.5	12484.5	45.2381	7012.4	47.5	10404	51.3514	4687.92	44.186	7696.67	51.3514	9143.36	40.4255	8478.9	44.186	23151.8	34.5455	12329.5	47.5	9231.4	57.5758	21866.3	65.5172
2.2	54.0541	13427.3	37.7358	10464.4	44.4444	4938.58	64.5161	11918.9	29.8507	3852.15	50	13508.4	71.4286	9514.94	66.6667	13720.5	74.0741	10818.1	41.6667	5090.3	50	5816.27	38.4615	5943.4	52.6316	20415.1	50	11947.1	47.619	8164.41	50	11616.1	54.0541	4480.07	46.5116	7143.4	54.0541	8863.68	42.5532	9193.15	46.5116	21697	36.3636	11043.6	50	10226.5	60.6061	22315.9	68.9655
2.31	56.7568	13481.8	39.6226	10437.4	46.6667	5452.05	67.7419	12485.7	31.3433	3465.18	52.5	13947.4	75	9799.35	70	12949.5	77.7778	10981	43.75	5160.26	52.5	6099.94	40.3846	5584.78	55.2632	19843.6	52.5	11382.2	50	8872.46	52.5	11295.5	56.7568	4263.92	48.8372	6939.34	56.7568	9055.04	44.6809	10163.2	48.8372	18978.9	38.1818	11173.7	52.5	10946.8	63.6364	21928.5	72.4138
2.42	59.4595	12359.5	41.5094	10053.4	48.8889	6215.59	70.9677	13040.5	32.8358	3275.54	55	14522.3	78.5714	9964.11	73.3333	12849.3	81.4815	10797.9	45.8333	5093.91	55	6145.82	42.3077	5842.49	57.8947	19836.4	55	11107.9	52.381	10591.2	55	11044.7	59.4595	3872.08	51.1628	6490.32	59.4595	8785.53	46.8085	10306.4	51.1628	18080.9	40	11586.4	55	10838.1	66.6667	21420.4	75.8621
2.53	62.1622	11576.1	43.3962	9596.6	51.1111	6551.33	74.1935	12338.9	34.3284	3176.97	57.5	15144.5	82.1429	10231.4	76.6667	12600.3	85.1852	10929.7	47.9167	5276.75	57.5	6322.45	44.2308	6230.43	60.5263	18869	57.5	11080	54.7619	12690.1	57.5	10488.8	62.1622	4146.62	53.4884	7126.75	62.1622	8335.63	48.9362	9170.37	53.4884	18028.1	41.8182	10843.9	57.5	10403.4	69.697	21151.4	79.3103
2.64	64.8649	10868.4	45.283	9162.99	53.3333	6396.24	77.4194	10694.7	35.8209	3082.51	60	15840.8	85.7143	10248.2	80	12358.2	88.8889	11644.9	50	5576.39	60	6372.7	46.1538	6508.09	63.1579	18551.6	60	11251.9	57.1429	13834	60	10872	64.8649	3893.03	55.814	7455.86	64.8649	7862.95	51.0638	8675.23	55.814	18413.8	43.6364	10638.3	60	10455.8	72.7273	20869.7	82.7586
2.75	67.5676	10012.4	47.1698	8322.61	55.5556	6500.63	80.6452	10447.7	37.3134	3030.53	62.5	16307.7	89.2857	10115.5	83.3333	11976.1	92.5926	13411.2	52.0833	5560.16	62.5	6356.81	48.0769	6997.23	65.7895	17273.8	62.5	11392.6	59.5238	12319.5	62.5	11506.5	67.5676	3839.42	58.1395	7604.06	67.5676	7900.58	53.1915	8748.78	58.1395	18053.9	45.4545	10700.3	62.5	9704.04	75.7576	21627.8	86.2069
2.86	70.2703	9851.63	49.0566	7915.85	57.7778	6902.6	83.871	10866.9	38.806	3058.24	65	16365.4	92.8571	9849.54	86.6667	11605.4	96.2963	13559.6	54.1667	5721.1	65	6335.59	50	6928.65	68.4211	17924.8	65	11583.9	61.9048	11238.2	65	10676.7	70.2703	3839.25	60.4651	7815.57	70.2703	7769.6	55.3191	10232.8	60.4651	18331.5	47.2727	12011.7	65	8971.01	78.7879	24858.4	89.6552
2.97	72.973	10155.9	50.9434	8257.71	60	7664.75	87.0968	10758.7	40.2985	3273.7	67.5	16268.8	96.4286	9000.78	90	11430.9	100	12742.3	56.25	6073.47	67.5	6193.36	51.9231	7229.99	71.0526	18149.7	67.5	11625.9	64.2857	9757.73	67.5	9860.78	72.973	3802.48	62.7907	7895.4	72.973	8130.45	57.4468	12238.5	62.7907	18634.3	49.0909	12339.4	67.5	8230.58	81.8182	28387.3	93.1034
3.08	75.6757	10706.7	52.8302	8601.69	62.2222	7710.1	90.3226	10508.2	41.791	3340.68	70	16439.4	100	8810.88	93.3333	11429.5			58.3333	5802.28	70	5846.98	53.8462	7337.83	73.6842	17160.8	70	11759.8	66.6667	8858.88	70	9232.27	75.6757	3900.03	65.1163	7735.41	75.6757	8380.02	59.5745	12727.3	65.1163	17574.6	50.9091	13112.9	70	6795.37	84.8485	25951.2	96.5517
3.19	78.3784	10680.8	54.717	9228.15	64.4444	7340.08	93.5484	9893.76	43.2836	3139.43	72.5	16116.3			96.6667	11276.1			60.4167	6127.79	72.5	6218.82	55.7692	7633.97	76.3158	16316	72.5	11444.6	69.0476	8420.22	72.5	8807.52	78.3784	4200.53	67.4419	7637.81	78.3784	8868.62	61.7021	12480.8	67.4419	17827.9	52.7273	12829	72.5	6647.57	87.8788	23449.5	100
3.3	81.0811	10073.5	56.6038	9470.25	66.6667	7297.07	96.7742	9122.88	44.7761	3308.54	75	14448			100	10226.9			62.5	6028.06	75	6168.83	57.6923	7581.27	78.9474	15711.2	75	10578.8	71.4286	9229.05	75	8566.7	81.0811	4092.02	69.7674	7779.83	81.0811	8993.05	63.8298	12329.3	69.7674	16944.1	54.5455	13117.5	75	7440.49	90.9091	21184.2
3.41	83.7838	9680.7	58.4906	9570.54	68.8889	7490.56	100	8905.92	46.2687	3319.06	77.5	12932.4							64.5833	6032.72	77.5	6249.8	59.6154	7430.51	81.5789	15848	77.5	10004	73.8095	10220.3	77.5	8835.59	83.7838	4059.45	72.093	8198.88	83.7838	8606.63	65.9574	11778.5	72.093	15315.6	56.3636	13707.5	77.5	7290.62	93.9394	19840.2
3.52	86.4865	9000.63	60.3774	8239.93	71.1111	7189.09			47.7612	3440.38	80	11840.4							66.6667	5974.71	80	6091.19	61.5385	7608.37	84.2105	16833.2	80	9663.1	76.1905	10583.3	80	8113.31	86.4865	4185.51	74.4186	8681.16	86.4865	7587.83	68.0851	12018.7	74.4186	14056.3	58.1818	13003.8	80	7192.71	96.9697	18706.9
3.63	89.1892	8479.59	62.2642	7562.56	73.3333	6887.39			49.2537	3868.49	82.5	10951							68.75	5576.57	82.5	5925.89	63.4615	7268.92	86.8421	18970.5	82.5	9742.54	78.5714	10107.5	82.5	7464.47	89.1892	4100.04	76.7442	8464.66	89.1892	6767.62	70.2128	11517.7	76.7442	13246.3	60	11769.6	82.5	6861.37	100	17469.3
3.74	91.8919	8158.73	64.1509	6795.19	75.5556	6332.07			50.7463	4126.25	85	10743.1							70.8333	5289.14	85	6188.94	65.3846	6818.6	89.4737	20336.9	85	9427.69	80.9524	8999.78	85	7566.35	91.8919	4714.68	79.0698	7643.38	91.8919	6499.11	72.3404	10886.1	79.0698	12557.7	61.8182	10892.5	85	6303.3
3.85	94.5946	7615.36	66.0377	6936.05	77.7778	6484.83			52.2388	4324.57	87.5	10516.9							72.9167	5171.89	87.5	6640.09	67.3077	6948.24	92.1053	20794.7	87.5	8609.28	83.3333	7756.89	87.5	7739.24	94.5946	4760.69	81.3953	7254.51	94.5946	6811.8	74.4681	9516.78	81.3953	12433.6	63.6364	10182.5	87.5	6022.98
3.96	97.2973	7285.59	67.9245	6777.61	80	7708.2			53.7313	4417.32	90	9907.96							75	5351.24	90	6660.95	69.2308	7137.66	94.7368	20589.6	90	8555.52	85.7143	7142.88	90	7396.33	97.2973	5012.97	83.7209	6441.52	97.2973	7139.9	76.5957	8857.92	83.7209	11151.7	65.4545	9623.06	90	5744.92
4.07	100	6596.03	69.8113	6922.29	82.2222	7551.63			55.2239	4676.01	92.5	9086.62							77.0833	4949.82	92.5	6580.83	71.1538	7240.84	97.3684	16677.4	92.5	7880	88.0952	6807.24	92.5	7647.93	100	5202.4	86.0465	6157.13	100	7346.81	78.7234	8225.5	86.0465	10701.5	67.2727	9831.98	92.5	5828.01
4.18			71.6981	7287.46	84.4444	7638.48			56.7164	5410.3	95	8853.17							79.1667	5206.47	95	6977.31	73.0769	7527.02	100	14451.7	95	7563.52	90.4762	6356.51	95	7349.44			88.3721	6608.77			80.8511	8831.64	88.3721	10842.7	69.0909	10295.9	95	6313.94
4.29			73.5849	7373.63	86.6667	7098.17			58.209	5501.06	97.5	8378.65							81.25	5308.81	97.5	6641.93	75	7547.33			97.5	7650.56	92.8571	7217.06	97.5	8155.29			90.6977	6465.24			82.9787	9771.92	90.6977	10640.7	70.9091	11878.6	97.5	6822.18
4.4			75.4717	7537.02	88.8889	5946.97			59.7015	4949.51	100	7944.99							83.3333	5282.72	100	5868.11	76.9231	8236.06			100	7652.48	95.2381	7236.28	100	8144.92			93.0233	6022.5			85.1064	9744.52	93.0233	10739.6	72.7273	13174.2	100	7345.28
4.51			77.3585	8360.24	91.1111	5849.11			61.194	4750.16									85.4167	5111.32			78.8462	8538.54					97.619	6569.58					95.3488	5691.55			87.234	9716.71	95.3488	10629.2	74.5455	12002.5
4.62			79.2453	8823.02	93.3333	5796.75			62.6866	4810.7									87.5	4035.83			80.7692	9297.84					100	6152.39					97.6744	5196.9			89.3617	9341.62	97.6744	10469.7	76.3636	12136.4
4.73			81.1321	8796.23	95.5556	6234.67			64.1791	5658.88									89.5833	3978.01			82.6923	10230.1											100	5174.1			91.4894	9191.29	100	9669.32	78.1818	11235.2
4.84			83.0189	8544.88	97.7778	6293.75			65.6716	6192.8									91.6667	3742.12			84.6154	9963.17															93.617	8336.27			80	9845.25
4.95			84.9057	8017.81	100	6540.96			67.1642	6702.78									93.75	3646.39			86.5385	9417.91															95.7447	7215.01			81.8182	8963.95
5.06			86.7925	7677.09					68.6567	6904.22									95.8333	3525.02			88.4615	8184.54															97.8723	7058.34			83.6364	7654.41
5.17			88.6792	7341.93					70.1493	7318.26									97.9167	3566.47			90.3846	7583.53															100	7414.88			85.4545	7011.06
5.28			90.566	6879.93					71.6418	7320.55									100	3533.83			92.3077	6794.48																			87.2727	6905.17
5.39			92.4528	6570.65					73.1343	6929.27													94.2308	6504.86																			89.0909	6714.04
5.5			94.3396	6683.36					74.6269	6903.59													96.1538	6685.68																			90.9091	6079.53
5.61			96.2264	6771.63					76.1194	5784.98													98.0769	6551.33																			92.7273	6531.5
5.72			98.1132	6798.51					77.6119	5122.92													100	6360.18																			94.5455	7140.51
5.83			100	6718.41					79.1045	4931.19																																	96.3636	8746.94
5.94									80.597	4705.29																																	98.1818	8318.61
6.05									82.0896	4587.74																																	100	8921
6.16									83.5821	4438.66
6.27									85.0746	4363.86
6.38									86.5672	4299.54
6.49									88.0597	4305.23
6.6									89.5522	4075.07
6.71									91.0448	4180.8
6.82									92.5373	4064.97
6.93									94.0299	4115.16
7.04									95.5224	4111.47
7.15									97.0149	4294.08
7.26									98.5075	4490.76
7.37									100	4535.23
7.48
7.59
7.7
7.81
7.92
8.03
8.14
	0		0		0		0		0		0		0		0		0		0		0		0		0		0		0		0		0		0		0		0		0		0		0		0		0
	5	16887.6	5	17544.5	5	11756.4	5	17298.9	5	10717.6	5	17250.3	5	18936	5	28256	5	22877	5	11916.8	5	15193.5	5	13420.8	5	24414.6	5	20078.4	5	13226.3	5	13765.3	5	10372.3	5	15361.2	5	16860.4	5	13328.7	5	24517.7	5	25779.6	5	16029.6	5	26270.2	5
	10	16092.1	10	16225.5	10	9567.24	10	15133.4	10	8220	10	16532.7	10	17104	10	27976	10	20947.6	10	9120.01	10	12167.9	10	10568.8	10	22103.2	10	20052.6	10	10401.6	10	12501.3	10	9609.27	10	12618.3	10	17456.9	10	9153.17	10	23953.2	10	18066.3	10	13801.6	10	23635.6	10
	15	11824.3	15	14755.2	15	7082.64	15	14157.2	15	6467.72	15	15049.9	15	14688	15	26192	15	17759.8	15	6824.93	15	8431.23	15	8314.96	15	19194.2	15	17969.6	15	8688.49	15	11994.7	15	7246.4	15	10267.9	15	15543.7	15	7400.8	15	23984.1	15	13021.8	15	10780.4	15	21304.5	15
	20	11531.2	20	15584	20	6417.75	20	14564.2	20	5329.22	20	14151.5	20	12432	20	21640	20	14823.8	20	6787.81	20	7506	20	6779.44	20	19196	20	15603.2	20	7915.89	20	10715.2	20	6193.11	20	8401.95	20	16875.6	20	8226.2	20	25373.4	20	13870.5	20	10084.2	20	19069.6	20
	25	12775.1	25	15962.9	25	7091.29	25	14893.2	25	5132.65	25	12969.6	25	12392	25	19752	25	13448.6	25	7741.2	25	8151.27	25	5505.48	25	21491.1	25	13520.3	25	9857.14	25	9903.88	25	5453.64	25	8344.86	25	16250	25	8608.69	25	24799.9	25	16263.3	25	11228.6	25	17091.5	25
	30	13438	30	13413.8	30	6449.85	30	14519.8	30	4182.2	30	12292.6	30	12968	30	18896	30	12953	30	7197.63	30	8255.07	30	5570.55	30	24913.6	30	12050.8	30	9917.89	30	9404.62	30	5355.19	30	8979.85	30	13284	30	7252.35	30	24796	30	13523.8	30	11809.4	30	18407.8	30
	35	14373.7	35	11471.5	35	5071.95	35	14512.1	35	3305.9	35	12047.2	35	14272	35	19624	35	12999.1	35	6376.5	35	7631.34	35	6897.8	35	20969.8	35	11607.6	35	7591.58	35	9209.85	35	5658.57	35	9747.54	35	11394.9	35	6939.49	35	23771.9	35	12970.7	35	10469.9	35	20454.3	35
	40	14578.3	40	10480.8	40	4807.72	40	14940.7	40	3057.09	40	11579.5	40	13376	40	20440	40	12805.2	40	5733.49	40	7221.63	40	6403.54	40	16965.3	40	13041.6	40	6921.53	40	9520.78	40	6613.95	40	9482.96	40	11588.2	40	7858.9	40	25068.8	40	11267.9	40	9014.86	40	18737.8	40
	45	14489	45	9824.99	45	4774.93	45	15466	45	3265.59	45	12327.7	45	13008	45	20488	45	13001.4	45	5125.28	45	6631.7	45	5885.9	45	17215.2	45	14104.2	45	7018.26	45	9295.16	45	7447.44	45	8228.35	45	10925.3	45	9278.41	45	24046.1	45	11022.9	45	8860.22	45	18964.9	45
	50	13563.8	50	8467.15	50	5833.82	50	16460.4	50	3542.64	50	13202.9	50	14808	50	20269.3	50	13352	50	5315.68	50	6056.13	50	6811.32	50	18579.7	50	12684.5	50	8016.42	50	10326.6	50	6092.07	50	7041.37	50	9772.48	50	9738.37	50	20338	50	11683.8	50	9589.45	50	19043.9	50
	55	13453.1	55	8695.85	55	6473.78	55	13150.4	55	4289.38	55	13992.7	55	13858.6	55	18062.4	55	13224.9	55	5619.22	55	6020.68	55	7165.49	55	19920.9	55	11479	55	10717.9	55	11318.8	55	4583.99	55	6808.53	55	9003.52	55	8712.01	55	18054.5	55	13019.8	55	10670.5	55	20278	55
	60	12920.7	60	9520.4	60	7022.66	60	11558.5	60	5134.22	60	15169.2	60	10958.6	60	14927.7	60	12297	60	5937.88	60	6280.32	60	7548.58	60	19840	60	11146.6	60	13076.7	60	10801.8	60	4068	60	7529.96	60	8920.28	60	11732.9	60	18233.8	60	12827	60	10565.8	60	21866.3	60
	65	11222.2	65	7532.56	65	7571.64	65	11760.4	65	5073.25	65	16171.3	65	10359.3	65	14668	65	12213.8	65	6062.86	65	6355.03	65	7438.65	65	18710.3	65	11409.5	65	10498	65	11018.4	65	4019.82	65	7855.48	65	8099.29	65	12405	65	18482.9	65	10948.2	65	9710.27	65	22122.2	65
	70	10012.4	70	6878.65	70	7393.82	70	12485.7	70	6599.93	70	16357.9	70	9946.77	70	13335	70	12096.2	70	5775.64	70	6125.31	70	6968.17	70	17599.3	70	11656.5	70	8639.55	70	9923.26	70	3839.42	70	7717.68	70	7900.58	70	11898.6	70	17448.9	70	9916.99	70	7998.99	70	21285.9	70
	75	10003.8	75	7330.55	75	7038.24	75	12689.7	75	7117.92	75	15667.9	75	9657.15	75	12899.4	75	10949.5	75	5270.76	75	6078.21	75	7438.4	75	17655.2	75	11261.1	75	9724.69	75	8868.83	75	3820.86	75	8440.02	75	7950.02	75	10640.2	75	14686	75	12351.8	75	6961.14	75	20869.7	75
	80	10693.7	80	8240.09	80	6841.7	80	10694.7	80	5279.7	80	13073.6	80	9881.73	80	12479.2	80	10981	80	5169.18	80	6169.94	80	8107.31	80	16013.6	80	10082	80	10345.4	80	8505.2	80	4050.28	80	8054.02	80	8624.32	80	8541.71	80	12902	80	11072.3	80	7307.94	80	23243.1	80
	85	9877.12	85	8452.97	85	7632.77	85	10657.3	85	4577.23	85	11178.2	85	10231.4	85	12167.2	85	10797.9	85	5295.77	85	6068.67	85	9830.39	85	16340.6	85	9611.11	85	8378.34	85	7714.71	85	4075.73	85	6848.02	85	8799.84	85	9301.78	85	11792.7	85	8821.2	85	6785.79	85	27169.3	85
	90	8740.11	90	7509.51	90	6522.57	90	10758.7	90	4260.93	90	10389.3	90	10181.8	90	11518.1	90	11287.3	90	4375.05	90	6496.66	90	8801.23	90	19653.7	90	8864.16	90	6975.06	90	7567.31	90	4142.77	90	6382.95	90	7177.73	90	9600.95	90	10772.1	90	6876.76	90	6023.73	90	23449.5	90
	95	7887.05	95	6711.31	95	5822.93	95	10201	95	4120.31	95	9282.58	95	9849.54	95	11430.2	95	13411.2	95	3694.26	95	6739.7	95	6960.96	95	20692.2	95	7999.68	95	6786.78	95	7464.57	95	4737.68	95	6243.87	95	6655.45	95	8763.78	95	10690.2	95	6583.85	95	5962.29	95	20512.2	95
	100	6940.81	100	6762.85	100	6356.46	100	9014.4	100	4357.89	100	8392.27	100	8905.83	100	10751.5	100	13151	100	3541.77	100	6495.78	100	6532.4	100	15564.5	100	7622.19	100	6652.75	100	7883.22	100	5107.68	100	5354.18	100	7243.35	100	7229.41	100	10256.1	100	8662.18	100	6827.13	100	18088.1	100
[truncated: 15 more columns]

## Sheet: IF Normalised
	0		0		0		0		0		0		0		0		0		0		0		0		0		0		0		0		0		0		0		0		0		0		0		0		0
	5	16887.6	5	17544.5	5	11756.4	5	17298.9	5	10717.6	5	17250.3	5	18936	5	28256	5	22877	5	11916.8	5	15193.5	5	13420.8	5	24414.6	5	20078.4	5	13226.3	5	13765.3	5	10372.3	5	15361.2	5	16860.4	5	13328.7	5	24517.7	5	25779.6	5	16029.6	5	26270.2	5
	10	16092.1	10	16225.5	10	9567.24	10	15133.4	10	8220	10	16532.7	10	17104	10	27976	10	20947.6	10	9120.01	10	12167.9	10	10568.8	10	22103.2	10	20052.6	10	10401.6	10	12501.3	10	9609.27	10	12618.3	10	17456.9	10	9153.17	10	23953.2	10	18066.3	10	13801.6	10	23635.6	10
	15	11824.3	15	14755.2	15	7082.64	15	14157.2	15	6467.72	15	15049.9	15	14688	15	26192	15	17759.8	15	6824.93	15	8431.23	15	8314.96	15	19194.2	15	17969.6	15	8688.49	15	11994.7	15	7246.4	15	10267.9	15	15543.7	15	7400.8	15	23984.1	15	13021.8	15	10780.4	15	21304.5	15
	20	11531.2	20	15584	20	6417.75	20	14564.2	20	5329.22	20	14151.5	20	12432	20	21640	20	14823.8	20	6787.81	20	7506	20	6779.44	20	19196	20	15603.2	20	7915.89	20	10715.2	20	6193.11	20	8401.95	20	16875.6	20	8226.2	20	25373.4	20	13870.5	20	10084.2	20	19069.6	20
	25	12775.1	25	15962.9	25	7091.29	25	14893.2	25	5132.65	25	12969.6	25	12392	25	19752	25	13448.6	25	7741.2	25	8151.27	25	5505.48	25	21491.1	25	13520.3	25	9857.14	25	9903.88	25	5453.64	25	8344.86	25	16250	25	8608.69	25	24799.9	25	16263.3	25	11228.6	25	17091.5	25
	30	13438	30	13413.8	30	6449.85	30	14519.8	30	4182.2	30	12292.6	30	12968	30	18896	30	12953	30	7197.63	30	8255.07	30	5570.55	30	24913.6	30	12050.8	30	9917.89	30	9404.62	30	5355.19	30	8979.85	30	13284	30	7252.35	30	24796	30	13523.8	30	11809.4	30	18407.8	30
	35	14373.7	35	11471.5	35	5071.95	35	14512.1	35	3305.9	35	12047.2	35	14272	35	19624	35	12999.1	35	6376.5	35	7631.34	35	6897.8	35	20969.8	35	11607.6	35	7591.58	35	9209.85	35	5658.57	35	9747.54	35	11394.9	35	6939.49	35	23771.9	35	12970.7	35	10469.9	35	20454.3	35
	40	14578.3	40	10480.8	40	4807.72	40	14940.7	40	3057.09	40	11579.5	40	13376	40	20440	40	12805.2	40	5733.49	40	7221.63	40	6403.54	40	16965.3	40	13041.6	40	6921.53	40	9520.78	40	6613.95	40	9482.96	40	11588.2	40	7858.9	40	25068.8	40	11267.9	40	9014.86	40	18737.8	40
	45	14489	45	9824.99	45	4774.93	45	15466	45	3265.59	45	12327.7	45	13008	45	20488	45	13001.4	45	5125.28	45	6631.7	45	5885.9	45	17215.2	45	14104.2	45	7018.26	45	9295.16	45	7447.44	45	8228.35	45	10925.3	45	9278.41	45	24046.1	45	11022.9	45	8860.22	45	18964.9	45
	50	13563.8	50	8467.15	50	5833.82	50	16460.4	50	3542.64	50	13202.9	50	14808	50	20269.3	50	13352	50	5315.68	50	6056.13	50	6811.32	50	18579.7	50	12684.5	50	8016.42	50	10326.6	50	6092.07	50	7041.37	50	9772.48	50	9738.37	50	20338	50	11683.8	50	9589.45	50	19043.9	50
	55	13453.1	55	8695.85	55	6473.78	55	13150.4	55	4289.38	55	13992.7	55	13858.6	55	18062.4	55	13224.9	55	5619.22	55	6020.68	55	7165.49	55	19920.9	55	11479	55	10717.9	55	11318.8	55	4583.99	55	6808.53	55	9003.52	55	8712.01	55	18054.5	55	13019.8	55	10670.5	55	20278	55
	60	12920.7	60	9520.4	60	7022.66	60	11558.5	60	5134.22	60	15169.2	60	10958.6	60	14927.7	60	12297	60	5937.88	60	6280.32	60	7548.58	60	19840	60	11146.6	60	13076.7	60	10801.8	60	4068	60	7529.96	60	8920.28	60	11732.9	60	18233.8	60	12827	60	10565.8	60	21866.3	60
	65	11222.2	65	7532.56	65	7571.64	65	11760.4	65	5073.25	65	16171.3	65	10359.3	65	14668	65	12213.8	65	6062.86	65	6355.03	65	7438.65	65	18710.3	65	11409.5	65	10498	65	11018.4	65	4019.82	65	7855.48	65	8099.29	65	12405	65	18482.9	65	10948.2	65	9710.27	65	22122.2	65
	70	10012.4	70	6878.65	70	7393.82	70	12485.7	70	6599.93	70	16357.9	70	9946.77	70	13335	70	12096.2	70	5775.64	70	6125.31	70	6968.17	70	17599.3	70	11656.5	70	8639.55	70	9923.26	70	3839.42	70	7717.68	70	7900.58	70	11898.6	70	17448.9	70	9916.99	70	7998.99	70	21285.9	70
	75	10003.8	75	7330.55	75	7038.24	75	12689.7	75	7117.92	75	15667.9	75	9657.15	75	12899.4	75	10949.5	75	5270.76	75	6078.21	75	7438.4	75	17655.2	75	11261.1	75	9724.69	75	8868.83	75	3820.86	75	8440.02	75	7950.02	75	10640.2	75	14686	75	12351.8	75	6961.14	75	20869.7	75
	80	10693.7	80	8240.09	80	6841.7	80	10694.7	80	5279.7	80	13073.6	80	9881.73	80	12479.2	80	10981	80	5169.18	80	6169.94	80	8107.31	80	16013.6	80	10082	80	10345.4	80	8505.2	80	4050.28	80	8054.02	80	8624.32	80	8541.71	80	12902	80	11072.3	80	7307.94	80	23243.1	80
	85	9877.12	85	8452.97	85	7632.77	85	10657.3	85	4577.23	85	11178.2	85	10231.4	85	12167.2	85	10797.9	85	5295.77	85	6068.67	85	9830.39	85	16340.6	85	9611.11	85	8378.34	85	7714.71	85	4075.73	85	6848.02	85	8799.84	85	9301.78	85	11792.7	85	8821.2	85	6785.79	85	27169.3	85
	90	8740.11	90	7509.51	90	6522.57	90	10758.7	90	4260.93	90	10389.3	90	10181.8	90	11518.1	90	11287.3	90	4375.05	90	6496.66	90	8801.23	90	19653.7	90	8864.16	90	6975.06	90	7567.31	90	4142.77	90	6382.95	90	7177.73	90	9600.95	90	10772.1	90	6876.76	90	6023.73	90	23449.5	90
	95	7887.05	95	6711.31	95	5822.93	95	10201	95	4120.31	95	9282.58	95	9849.54	95	11430.2	95	13411.2	95	3694.26	95	6739.7	95	6960.96	95	20692.2	95	7999.68	95	6786.78	95	7464.57	95	4737.68	95	6243.87	95	6655.45	95	8763.78	95	10690.2	95	6583.85	95	5962.29	95	20512.2	95
	100	6940.81	100	6762.85	100	6356.46	100	9014.4	100	4357.89	100	8392.27	100	8905.83	100	10751.5	100	13151	100	3541.77	100	6495.78	100	6532.4	100	15564.5	100	7622.19	100	6652.75	100	7883.22	100	5107.68	100	5354.18	100	7243.35	100	7229.41	100	10256.1	100	8662.18	100	6827.13	100	18088.1	100
	0		0		0		0		0		0		0		0		0		0		0		0		0		0		0		0		0		0		0		0		0		0		0		0		0
	5	1	5	1	5	1	5	1	5	1	5	1	5	1	5	1	5	1	5	1	5	1	5	1	5	1	5	1	5	1	5	1	5	1	5	1	5	1	5	1	5	1	5	1	5	1	5	1	5
	10	0.952896	10	0.924818	10	0.813787	10	0.874821	10	0.766963	10	0.958402	10	0.903253	10	0.990091	10	0.915662	10	0.765307	10	0.800862	10	0.787493	10	0.905325	10	0.998714	10	0.786434	10	0.908175	10	0.926439	10	0.821437	10	1.03538	10	0.686727	10	0.976974	10	0.700796	10	0.861003	10	0.89971	10
	15	0.700179	15	0.841014	15	0.602448	15	0.818386	15	0.603467	15	0.87244	15	0.775665	15	0.926954	15	0.776319	15	0.572714	15	0.554924	15	0.619558	15	0.786177	15	0.894969	15	0.65691	15	0.871368	15	0.698632	15	0.668432	15	0.921906	15	0.555254	15	0.978237	15	0.505118	15	0.672531	15	0.810977	15
	20	0.682822	20	0.888254	20	0.545892	20	0.841915	20	0.49724	20	0.820361	20	0.656527	20	0.765855	20	0.647978	20	0.569599	20	0.494027	20	0.505145	20	0.786248	20	0.777115	20	0.598496	20	0.77842	20	0.597084	20	0.546959	20	1.0009	20	0.617181	20	1.0349	20	0.538039	20	0.629098	20	0.725902	20
	25	0.756479	25	0.909849	25	0.603184	25	0.860935	25	0.478899	25	0.751848	25	0.654415	25	0.699037	25	0.587868	25	0.649603	25	0.536498	25	0.41022	25	0.880253	25	0.673374	25	0.745268	25	0.71948	25	0.52579	25	0.543242	25	0.963799	25	0.645877	25	1.01151	25	0.63086	25	0.700487	25	0.650603	25
	30	0.795732	30	0.764555	30	0.548623	30	0.839347	30	0.390217	30	0.712599	30	0.684833	30	0.668743	30	0.566204	30	0.60399	30	0.54333	30	0.415069	30	1.02044	30	0.600188	30	0.749861	30	0.68321	30	0.516299	30	0.584579	30	0.787885	30	0.544116	30	1.01135	30	0.524592	30	0.736725	30	0.700707	30
	35	0.85114	35	0.653848	35	0.431419	35	0.838905	35	0.308455	35	0.698378	35	0.753697	35	0.694507	35	0.568215	35	0.535084	35	0.502277	35	0.513964	35	0.858902	35	0.578114	35	0.573976	35	0.669061	35	0.545548	35	0.634555	35	0.675837	35	0.520643	35	0.969579	35	0.503136	35	0.653161	35	0.778612	35
	40	0.863256	40	0.597384	40	0.408944	40	0.86368	40	0.28524	40	0.671264	40	0.706379	40	0.723386	40	0.55974	40	0.481126	40	0.475311	40	0.477136	40	0.694884	40	0.649535	40	0.523316	40	0.691649	40	0.637658	40	0.617331	40	0.687301	40	0.589624	40	1.02248	40	0.437086	40	0.562387	40	0.713272	40
	45	0.857967	45	0.560003	45	0.406154	45	0.894047	45	0.304694	45	0.714636	45	0.686946	45	0.725085	45	0.568317	45	0.430088	45	0.436483	45	0.438566	45	0.705119	45	0.702455	45	0.530629	45	0.675259	45	0.718016	45	0.535657	45	0.647985	45	0.696124	45	0.980763	45	0.427581	45	0.55274	45	0.721915	45
	50	0.803183	50	0.482609	50	0.496223	50	0.951531	50	0.330544	50	0.765369	50	0.782003	50	0.717344	50	0.583645	50	0.446066	50	0.3986	50	0.50752	50	0.761008	50	0.631746	50	0.606097	50	0.750189	50	0.587343	50	0.458386	50	0.579612	50	0.730633	50	0.829522	50	0.453218	50	0.598233	50	0.724924	50
	55	0.796625	55	0.495644	55	0.550659	55	0.760187	55	0.400218	55	0.811156	55	0.731863	55	0.63924	55	0.578088	55	0.471537	55	0.396267	55	0.53391	55	0.815942	55	0.57171	55	0.810351	55	0.822266	55	0.441948	55	0.443229	55	0.534004	55	0.653629	55	0.736385	55	0.505043	55	0.665671	55	0.771898	55
	60	0.765099	60	0.542642	60	0.597346	60	0.668167	60	0.479045	60	0.879358	60	0.578717	60	0.528301	60	0.537526	60	0.498277	60	0.413356	60	0.562454	60	0.812628	60	0.555152	60	0.988692	60	0.78471	60	0.3922	60	0.490193	60	0.529068	60	0.880274	60	0.743701	60	0.497563	60	0.659139	60	0.83236	60
	65	0.664526	65	0.429339	65	0.644042	65	0.679837	65	0.473356	65	0.93745	65	0.547071	65	0.519113	65	0.53389	65	0.508765	65	0.418274	65	0.554263	65	0.766355	65	0.568246	65	0.793719	65	0.800447	65	0.387555	65	0.511384	65	0.480374	65	0.930702	65	0.753859	65	0.424683	65	0.60577	65	0.842102	65
	70	0.592886	70	0.392068	70	0.628916	70	0.721765	70	0.615803	70	0.948265	70	0.525284	70	0.471934	70	0.528751	70	0.484663	70	0.403154	70	0.519207	70	0.72085	70	0.580551	70	0.65321	70	0.720888	70	0.370162	70	0.502413	70	0.468588	70	0.892709	70	0.711685	70	0.384683	70	0.499012	70	0.810266	70
	75	0.592375	75	0.417825	75	0.598671	75	0.733553	75	0.664133	75	0.908267	75	0.509989	75	0.456519	75	0.478625	75	0.442296	75	0.400054	75	0.554244	75	0.723141	75	0.560854	75	0.735254	75	0.644287	75	0.368373	75	0.549437	75	0.471521	75	0.798293	75	0.598994	75	0.479129	75	0.434267	75	0.794422	75
	80	0.633232	80	0.469667	80	0.581954	80	0.618231	80	0.492619	80	0.757875	80	0.521849	80	0.441649	80	0.48	80	0.433772	80	0.406091	80	0.604086	80	0.655902	80	0.502129	80	0.782181	80	0.617871	80	0.390492	80	0.524309	80	0.511514	80	0.640852	80	0.526231	80	0.429498	80	0.455902	80	0.88477	80
	85	0.584876	85	0.481801	85	0.649242	85	0.616067	85	0.427076	85	0.647998	85	0.540316	85	0.430605	85	0.471996	85	0.444394	85	0.399426	85	0.732474	85	0.669294	85	0.478679	85	0.63346	85	0.560445	85	0.392946	85	0.445799	85	0.521924	85	0.697877	85	0.480987	85	0.342177	85	0.423328	85	1.03422	85
	90	0.517547	90	0.428026	90	0.554808	90	0.621931	90	0.397563	90	0.60227	90	0.537698	90	0.407636	90	0.49339	90	0.367133	90	0.427595	90	0.65579	90	0.804997	90	0.441477	90	0.527363	90	0.549737	90	0.399409	90	0.415524	90	0.425715	90	0.720323	90	0.43936	90	0.266751	90	0.375787	90	0.892626	90
	95	0.467033	95	0.38253	95	0.495297	95	0.589688	95	0.384443	95	0.538111	95	0.520149	95	0.404523	95	0.586229	95	0.310004	95	0.443591	95	0.51867	95	0.847531	95	0.398422	95	0.513128	95	0.542273	95	0.456765	95	0.40647	95	0.394739	95	0.657513	95	0.436018	95	0.255389	95	0.371954	95	0.780816	95
	100	0.411001	100	0.385468	100	0.540679	100	0.521097	100	0.40661	100	0.4865	100	0.470312	100	0.380503	100	0.574855	100	0.297208	100	0.427537	100	0.486737	100	0.637508	100	0.379621	100	0.502994	100	0.572686	100	0.492437	100	0.348552	100	0.429608	100	0.542395	100	0.418312	100	0.336009	100	0.425907	100	0.68854	100
[truncated: 15 more columns]

## Sheet: Summary
% Chromosome Length		Mean	STDDEV	SEM		Mean	STDDEV	SEM
0-5	IF	1	0	0	FISH	539.327	255.589	46.664
5-10		0.888229	0.0947879	0.0173058		761.493	361.567	66.0128
10-15		0.763085	0.143264	0.0261563		1155.86	420.411	76.7562
15-20		0.719032	0.160669	0.0293339		1770.5	630.929	115.191
20-25		0.726968	0.16996	0.0310304		2251.21	734.577	134.115
25-30		0.703	0.174166	0.0317982		2436.31	804.45	146.872
30-35		0.657445	0.15939	0.0291004		2283.37	848.106	154.842
35-40		0.625659	0.153599	0.0280432		1857.96	913.282	166.742
40-45		0.617432	0.149863	0.0273611		1295.27	714.058	130.368
45-50		0.614549	0.142954	0.0260997		822.499	447.909	81.7765
50-55		0.614674	0.132517	0.0241942		565.66	253.525	46.2872
55-60		0.630288	0.149866	0.0273617		405.816	127.796	23.3322
60-65		0.613596	0.151747	0.0277051		338.845	78.6089	14.352
65-70		0.583597	0.145959	0.0266484		302.633	55.5647	10.1447
70-75		0.576488	0.132334	0.0241609		281.75	44.9049	8.19847
75-80		0.561832	0.115384	0.0210661		269.629	46.1736	8.4301
80-85		0.554853	0.135877	0.0248076		258.596	39.4891	7.20969
85-90		0.51889	0.133293	0.0243358		249.082	32.2864	5.89465
90-95		0.501541	0.125881	0.0229826		248.269	32.7092	5.97185
95-100		0.496336	0.140444	0.0256415		246.772	47.0274	8.586
