# Supplementary material for: Large domains of heterochromatin direct the formation of short mitotic chromosome loops
Source: eLife. 2020 Sep 11;9:e57212. doi: 10.7554/eLife.57212 (PMC7515631; doi:10.7554/eLife.57212)
Supplement: Figure 3—source data 1. [file elife-57212-fig3-data1.xlsx]

## Sheet: All Values
	01_FISH	01_PI		2A_FISH	2A_PI		3_FISH	3_PI		4_FISH	4_PI		5_FISH	5_PI		6_FISH	6_PI		8_FISH	8_PI		9_FISH	9_PI		10_FISH	10_PI		12_FISH	12_PI		13_FISH	13_PI		14_FISH	14_PI		15_FISH	15_PI		16_FISH	16_PI		18_FISH	18_PI		19_FISH	19_PI		20_FISH
X	Y	Y	X	Y	Y	X	Y	Y	X	Y	Y	X	Y	Y	X	Y	Y	X	Y	Y	X	Y	Y	X	Y	Y	X	Y	Y	X	Y	Y	X	Y	Y	X	Y	Y	X	Y	Y	X	Y	Y	X	Y	Y	X	Y
0	7	131	0	19	233	0	9	93	0	4	196	0	3	166	0	4	172	0	4	155	0	8	177	0	6	193	0	4	166	0	7	157	0	14	212	0	7	161	0	6	179	0	3	165	0	5	182	0	8
1	7.148	133.857	1	9.1849	217.735	1	8.8686	100.45	1	4.707	200.864	1	3.0162	160.559	1	4.85	180.055	1	4.091	155.921	1	7	170	1	5.5056	203.028	1	3.36	175.172	1	6.5057	168.453	1	13.737	200.801	1	6.901	174.336	1	6.024	166.807	1	2.085	149.637	1	5.649	186.938	1	7
2	7.26	129.192	2	4.8211	189.238	2	8.6542	110.741	2	5	198.615	2	3	162.044	2	4.717	178.194	2	4.518	150.247	2	7	161	2	5.8944	206.367	2	3.28	173.526	2	6.0114	163.162	2	13.474	193.217	2	5.8109	169.067	2	6.246	163.114	2	2	133.948	2	5.935	186.432	2	6
3	6.695	122.144	3	3.1936	165.034	3	9.0519	110.64	3	4.985	192.665	3	3	151.891	3	3.606	160.241	3	5.4949	151.138	3	6	140	3	5.3167	202.701	3	3.921	158.951	3	5.5171	152.696	3	12.128	179.718	3	5.7015	160.34	3	6.015	155.198	3	2	115.743	3	6.846	181.951	3	7
4	5.959	112.51	4	4.7592	143.501	4	10	105.104	4	4.314	177.887	4	3.2105	137.977	4	3.434	142.986	4	6	154.846	4	7	116	4	5	191.968	4	5.267	139.4	4	5.0228	144.129	4	12	162.91	4	5.012	142.559	4	6.835	141.628	4	2	102.636	4	7.795	160.126	4	11
5	5.159	98.2463	5	9.809	124.672	5	10	96.4321	5	3.751	156.518	5	3.1491	126.121	5	4.521	125.177	5	6	158.342	5	7	99	5	4.5279	177.767	5	7.915	119.84	5	4.8366	135.101	5	13.648	147.158	5	5.9752	127.375	5	7.089	131.417	5	2	93.6151	5	8	133.724	5	18
6	5.097	86.4062	6	16.7129	113.283	6	9.912	86.8554	6	4	142.368	6	2.929	114.003	6	6.325	110.056	6	6	159.677	6	7	88	6	4	164.054	6	9.45	102.647	6	4.0268	124.351	6	14.456	129.779	6	6.5792	110.706	6	7.602	118.418	6	2	86.1937	6	7.308	111.316	6	28
7	5	78.0858	7	19.9283	105.3	7	9.064	75.8949	7	4	129.095	7	3.0767	101.44	7	6.039	96.953	7	6	142.875	7	8	81	7	4.0341	147.139	7	10	87.239	7	3.9609	114.429	7	14.208	116.078	7	6.6965	101.12	7	8.271	104.445	7	2	80.1303	7	5.642	94.501	7	39
8	4.852	71.9768	8	16.6824	106.705	8	8.9482	68.9489	8	2.852	117.848	8	2.4105	93.428	8	6.657	86.541	8	6	132.903	8	7	81	8	4.6675	130.942	8	8.966	74.381	8	3.0892	103.775	8	13.97	105.491	8	6.796	96.187	8	8.928	88.89	8	2	76.2951	8	4.411	84.814	8	41
9	4.071	70.1135	9	12.7182	109.006	9	9.7773	66.4987	9	2.437	111.705	9	2.0828	89.853	9	6.703	78.013	9	6.4885	128.069	9	7	86	9	6.0274	119.46	9	4.69	69.361	9	3.8236	89.21	9	13.749	100.418	9	6.04	88.478	9	9.536	75.649	9	1.9936	75.0483	9	4.083	80.273	9	30
10	4	69.2093	10	8.2767	110.9	10	10.4528	64.5053	10	2.789	112.259	10	2	87.689	10	6.804	75.615	10	6.3078	120.556	10	7	88	10	7.3638	112.734	10	4.274	71.321	10	4.0395	80.526	10	13.13	97.126	10	6	87.031	10	9.858	68.709	10	2	76.012	10	4	80.395	10	18
11	4.491	69.0107	11	5.5379	109.5	11	11.8966	63.1105	11	4.294	114.917	11	2.4355	88.785	11	7.605	75.852	11	6	112.921	11	7	87	11	11.1389	110.2	11	5.206	74.267	11	3.879	72.108	11	13.065	95.058	11	6.4868	89.573	11	9.937	65.966	11	1.5284	76.5858	11	4	81.313	11	11
12	4.832	70.9734	12	4.9476	107.702	12	13.6871	63.5186	12	7.196	115.912	12	3	90.568	12	7.212	77.365	12	6	116.858	12	6	83	12	14.3703	106.041	12	8.725	75.222	12	3.5387	67.097	12	13.247	97.823	12	6.6456	87.233	12	10	62	12	1	80.5425	12	4	80.105	12	8.102
13	4	76.7862	13	4.6099	110.3	13	14.7674	60.3904	13	10.917	118.138	13	3	89.112	13	6.787	82.258	13	6	117.184	13	7	81	13	17.1857	103.234	13	10.969	78.242	13	4	66.599	13	13	101.932	13	7.9703	86.321	13	10	59.917	13	1.2011	83.4245	13	4.666	79.148	13	8.137
14	4	84.0694	14	4.023	112.026	14	14.1438	58.2927	14	9.538	118.844	14	3	88.241	14	6.96	85.578	14	5.3513	112.383	14	7	82	14	15.3159	97.873	14	11.812	82.389	14	3.8435	67.313	14	13	96.982	14	9.4269	88.699	14	9.99	62.53	14	1.2855	84.7873	14	6.927	78.415	14	9.839
15	4	92.3868	15	3.1675	117.01	15	11.9938	61.747	15	7.837	118.2	15	3	89.77	15	7.972	86.335	15	5.9553	110.642	15	8	83	15	11.1459	92.489	15	9.273	84.442	15	2.5855	69.924	15	13.246	90.162	15	9.9361	92.749	15	10	70.138	15	1.4614	84.0841	15	9.302	72.447	15	10.124
16	4	95.8248	16	3.2848	118.526	16	10.6872	61.4127	16	5.619	115.911	16	3.1974	92.316	16	9.02	84.213	16	8.0632	112.125	16	8	80	16	7.7145	88.107	16	6.346	86.283	16	2.0912	73.461	16	13	90.036	16	8.5215	93.172	16	10	75.881	16	3.011	81.449	16	11.158	66.404	16	9.992
17	4.416	98.4011	17	3.8026	120.263	17	9.4014	58.9442	17	2.654	113.493	17	3.6494	93.652	17	8.62	80.127	17	10.0047	106.76	17	8.269	79.4848	17	5.1244	88.449	17	3.997	89.367	17	2	78.814	17	13	93.016	17	7.2533	95.456	17	9.915	76.872	17	5.5676	83.3432	17	11.073	64.183	17	9.16
18	4.933	101.394	18	3.601	123.536	18	8.8448	60.2413	18	1.099	115.727	18	3.4427	95.902	18	7.419	77.567	18	11.9461	103.972	18	8.539	80.6184	18	4.1289	87.241	18	1.821	89.159	18	2	78.553	18	14.591	92.526	18	6.8972	94.395	18	9.107	82.209	18	7.3888	86.2737	18	8.601	68.563	18	8.295
19	5.676	99.9069	19	3.0412	129.331	19	7.8176	61.0057	19	0.355	118.378	19	4	99.828	19	5.24	77.683	19	12.2499	102.736	19	8.965	78.6916	19	3.6368	85.519	19	1	87.216	19	1.6083	75.619	19	14.605	97.147	19	7.5225	91.754	19	8.259	92.687	19	7.8438	89.4176	19	4.957	76.303	19	7.535
20	5.29	96.87	20	4.385	131.56	20	6.6841	63.6241	20	0	120.055	20	3.9911	98.865	20	4.095	76.534	20	10.5854	99.0659	20	9.708	74.1802	20	3.7903	86.092	20	2.022	87.865	20	1.114	76.342	20	13.99	101.601	20	8.5755	89.816	20	7.484	101.896	20	6.6128	90.461	20	3.762	85.492	20	7.843
21	4.29	98.13	21	5.6517	132.438	21	6.4012	67.0344	21	0	116.937	21	3.5001	95.501	21	4	75.321	21	8.4928	103.671	21	11.347	70.7859	21	4	84.449	21	5.061	89.767	21	1.2551	76.74	21	13.345	99.417	21	9.6325	87.468	21	6.908	100.283	21	4.42	88.8742	21	3.013	94.124	21	7.495
22	2.58	102.55	22	9.2271	134.635	22	7.1061	67.6091	22	0	114.929	22	3.2127	94.805	22	4	73.51	22	7.5682	105.262	22	11.259	69.1781	22	4	84.262	22	10.887	91.484	22	2.3576	74.361	22	12.217	101.35	22	11.0259	85.527	22	8.434	97.095	22	2.6799	88.6853	22	3.659	100.43	22	7
23	1.29	100.45	23	8.4668	138.712	23	7.8983	67.9338	23	0	117.439	23	3.9218	94.066	23	3.66	74.11	23	7.0398	107.656	23	10.969	67.5412	23	3.5918	84.161	23	19.946	87.22	23	5.3453	73.859	23	11	106.292	23	10.7641	90.831	23	12.746	95.435	23	2.3909	88.374	23	3.994	103.621	23	6.545
24	0.423	95.2802	24	6.563	134.358	24	8.9112	68.2847	24	0	119.579	24	4	91.53	24	3	76.79	24	7	106.694	24	9.748	66.9596	24	3.2434	82.894	24	22.898	82.032	24	14.8838	75.571	24	11	109.718	24	8.2284	92.599	24	18.615	92.67	24	2.2224	86.7776	24	5.808	105.504	24	6
25	0.417	89.571	25	4.2339	129.347	25	8.9446	68.5556	25	0	119.365	25	4	92.518	25	2.925	77.763	25	7	101.367	25	7.47	70.5418	25	3.1721	85.785	25	17.169	79.19	25	32.258	77.002	25	9.955	115.796	25	6.313	95.289	25	24.939	86.44	25	2.0427	87.1358	25	6.331	98.818	25	6
26	0.877	86.6748	26	1.9618	129.882	26	8.3723	68.1191	26	0	122.513	26	4	96.866	26	2.366	75.79	26	6.9707	102.957	26	5.982	74.8759	26	3.1009	92.567	26	10.321	79.278	26	60.8768	77.615	26	9.345	116.953	26	5.3297	98.827	26	26.908	79.493	26	1.231	87.7537	26	6.939	94.169	26	6.254
27	1.609	90.4367	27	0.1546	125.853	27	7.8623	65.989	27	0	125.638	27	4	93.967	27	2	75.451	27	5.934	103.938	27	5.809	80.6423	27	3.5977	98.253	27	2.934	80.445	27	75.4115	76.318	27	10	112.786	27	5.2391	98.607	27	22.848	75.968	27	0.3454	87.0623	27	8.633	91.784	27	6.627
28	2	90.9711	28	1.4525	122.665	28	6.8064	64.2138	28	0	124.35	28	4	88.779	28	2	77.628	28	5.0736	102.171	28	5.519	83.5906	28	3.9826	101.766	28	0.223	81.227	28	63.6729	73.821	28	10	108.811	28	6.0191	96.793	28	14.985	73.609	28	0	86.5531	28	9.736	93.452	28	4.881
29	2	87.9552	29	3.7004	116.792	29	4.9352	65.7955	29	1.748	118.862	29	3.3375	89.117	29	2	79.509	29	5	96.1354	29	5.29	84	29	4	105.902	29	2.196	82.834	29	33.1018	71.04	29	9.285	107.031	29	5.7	96.414	29	8.303	69.314	29	0	86.6817	29	8.403	95.514	29	3.962
30	2	83.7212	30	8.6654	111.145	30	4	67.5846	30	10.032	112.641	30	3.0534	93.021	30	2.16	84.13	30	4.6038	90.7235	30	4.939	83.5983	30	3.8936	109.733	30	11.255	82.459	30	10.9202	67.987	30	8.683	106.543	30	5.1567	90.781	30	5.564	72.097	30	0.2219	89.0332	30	6.526	96.579	30	3.015
31	2	82.15	31	15.4592	104.891	31	4.0002	69.4446	31	31.819	107.234	31	3.1575	94.904	31	2.994	85.253	31	4.0876	91.4209	31	4.087	81.4266	31	3.7446	112.726	31	38.043	79.553	31	2.65	65.457	31	8.014	105.646	31	4.248	87.988	31	8.689	75.443	31	0.1686	91.948	31	6	98.671	31	4.426
32	4.55	79.45	32	23.6217	94.532	32	4.0009	69.2035	32	66.064	103.184	32	3	95.494	32	2.192	84.691	32	4.6971	88.341	32	2.455	80.1288	32	3.6734	115.531	32	71.57	77.915	32	0.3984	63.696	32	7.758	100.681	32	4	89.579	32	14.705	77.197	32	0.2727	90.7885	32	5.327	102.434	32	9.106
33	9.25	79	33	28.888	83.295	33	3.0632	72.2731	33	117.408	97.457	33	3.0256	93.932	33	2.192	83.938	33	4.9375	86.8607	33	1.467	79.59	33	3.6021	116.148	33	85.837	78.747	33	0	61.342	33	8.382	99.295	33	3.9195	90.204	33	24.444	81.917	33	0	88.9233	33	4.86	103.967	33	18.258
34	17.65	78.15	34	25.502	79.328	34	2.5755	72.2692	34	171.699	94.039	34	3.3453	89.884	34	2.055	85.364	34	5.0103	86.2417	34	0	76.879	34	3.5309	116.658	34	60.406	80.344	34	0.1077	62.429	34	10	110	34	3.0703	92.061	34	33.666	84.266	34	0	89.7224	34	4.558	101.569	34	31.072
35	24.1	83.1	35	19.441	78.449	35	5.0193	74.6825	35	169.718	94.923	35	3.8866	86.568	35	2	87.277	35	5	81.3362	35	0.277	80.0567	35	3.765	119.236	35	28.363	76.59	35	0.1728	69.459	35	10	106.984	35	3	92.315	35	28.61	84.158	35	0	84.5765	35	4.328	100.661	35	31.383
36	53.9	84	36	14.0472	83.401	36	13.1055	72.6265	36	126.397	97.568	36	5.1521	85.779	36	2.252	88.137	36	4.171	79.2629	36	0.08	79.4431	36	4	121.3	36	9.372	72.251	36	0	78.735	36	9.341	103.168	36	3	95.698	36	15.146	82.933	36	0	79.9959	36	3.58	102.659	36	22.276
37	116.8	86.55	37	8.8995	88.945	37	39.6238	67.1474	37	79.524	107.528	37	6.977	87.315	37	3.535	84.184	37	4	79.8119	37	0	78.2314	37	4	120.751	37	11.424	68.778	37	0	81.578	37	10.091	101.985	37	3.0459	95.352	37	5.5	79.916	37	0.2386	80.1516	37	2.61	100.932	37	16.042
38	175.259	85.6184	38	5.1085	97.772	38	73.9367	60.0933	38	44.175	118.049	38	6.9092	91.447	38	4.425	80.236	38	4	80.9806	38	0	78.1137	38	3.5796	118.902	38	33.239	67.434	38	0.0589	80.615	38	20.467	101.311	38	3.8369	85.517	38	2.906	77.768	38	1.5233	79.0484	38	1.707	93.868	38	19.379
39	178.776	88.2001	39	2.8765	107.69	39	92.825	52.4296	39	22.111	129.643	39	6.6247	94.239	39	5.473	74.8	39	4	80.393	39	0	80.0197	39	3.1747	118.786	39	80.946	71.727	39	2.0553	79.485	39	50.074	102.323	39	5.5959	85.175	39	4.677	80.157	39	9.3968	75.8434	39	1.122	86.603	39	46.956
40	154.704	88.7638	40	3.22	117.799	40	96.8175	47.6785	40	7.758	137.071	40	5.4066	96.814	40	7.171	72.241	40	3.3296	75.3359	40	0	86.0195	40	3.1034	118.78	40	118.337	72.729	40	6.6983	75.823	40	98.872	102.446	40	12.3442	84.889	40	14.78	83.24	40	27.1475	72.7371	40	1	84.44	40	115.238
41	102.068	92.7064	41	4.4425	120.725	41	68.7919	44.7878	41	1.525	139.271	41	5.8109	98.321	41	6.529	73.48	41	3.0059	70.8521	41	0	90.8946	41	3.0322	116.511	41	140.861	72.754	41	18.0737	69.039	41	151.642	102.862	41	24.6171	87.821	41	34.286	82.798	41	53.2609	71.4781	41	0.834	84.792	41	201.481
42	53.83	98.5195	42	4.7993	112.128	42	32.7416	44.9711	42	0.217	140.909	42	6.7462	96.877	42	7.717	73.514	42	3	68.9686	42	1.947	87.5123	42	3	115.316	42	159.308	71.666	42	35.5608	63.154	42	186.325	93.763	42	33.17	88.396	42	62.85	80.188	42	70.1943	72.0918	42	0.096	83.531	42	230.151
43	29.397	102.876	43	4.3269	111.356	43	10.6337	48.7435	43	0.56	139.101	43	10.3345	100.179	43	10.258	74.42	43	3	74.9241	43	7.177	84.2175	43	3	111.809	43	202.154	73.203	43	45.4527	60.104	43	162.435	90.036	43	26.8643	87.216	43	92.934	79.291	43	53.695	75.4605	43	0	82.746	43	186.518
44	14.476	101.944	44	4.1391	107.486	44	3.79	53.897	44	1.54	128.807	44	13.6272	100.552	44	12.926	75.529	44	3.5105	84.4999	44	15.407	80.4488	44	2.9015	107.496	44	238.635	79.218	44	41.5788	57.88	44	98.041	92.292	44	25.8416	78.058	44	116.905	75.321	44	31.9751	80.8605	44	0.047	82.045	44	97.758
45	4.867	98.6922				45	4.5973	60.2523				45	15.5806	100.384	45	11.312	78.902	45	3.8578	93.8522	45	26.372	77.7464	45	2.7472	106.248	45	214.521	87.793	45	26.4378	57.121	45	42.116	95.12	45	29.5872	71.92	45	133.432	73.627	45	11.9626	86.1354	45	0.067	79.503	45	41.626
46	0.868	96.7899				46	8.9738	68.4015				46	12.2845	97.681	46	7.056	80.51	46	3.7177	106.776	46	45.614	72.9746	46	3.213	104.713	46	140.453	90.434	46	12.4459	60.668	46	16.298	98.71	46	29.8912	67.357	46	119.623	74.997	46	3.307	93.1998	46	0	76.299	46	41.41
47	0	97.92				47	12.8023	75.4076				47	8.1729	96.494	47	2.484	81.632	47	3.4156	115.195	47	86.712	67.2664	47	5.5316	103.296	47	72.123	89.872	47	6.3348	64.178	47	4.872	100.985	47	39.4808	61.244	47	81.951	75.166	47	0.5291	97.1159	47	0	75.526	47	63.8
48	0.64	98.36				48	12.7986	82.1356				48	5.2725	99.556	48	1.162	79.15	48	2.8903	119.864	48	154.39	62.7939	48	11.3942	104.911	48	34.225	99.53	48	5.5286	69.083	48	1.404	105.665	48	69.9048	58.964	48	42.406	74.754	48	0	101.185	48	1.666	72.449	48	122.966
49	1	96.72				49	11.3941	89.2272				49	3.4342	97.896	49	3.726	78.553	49	2.3852	124.798	49	204.174	59.9271	49	19.4983	107.357	49	17.186	105.298	49	6.7939	75.701	49	2.217	115.973	49	79.768	63.766	49	18.98	74.231	49	0	105.087	49	8.578	73.378	49	185.246
50	1.788	96.7882				50	9.0658	93.0699				50	2.4336	95.405	50	15.062	78.711	50	1.1663	127.385	50	196.407	60.8189	50	22.6005	106.214	50	8.495	107.403	50	8.5283	82.929	50	4.794	118.911	50	65.0544	69.913	50	6.407	80.305	50	0	107.51	50	26.65	76.609	50	181.699
51	3.001	96.4391				51	6.9717	95.84				51	1.2767	95.816	51	48.258	76.549	51	1.0517	120.283	51	112.484	64.2105	51	27.2441	101.739	51	2.63	107.49	51	9.0847	87.11	51	8.09	116.936	51	37.4256	75.697	51	1.137	86.694	51	0.9872	106.309	51	62.019	79.732	51	126.657
52	4.214	95.5106				52	6.0482	100.18				52	1.5064	93.274	52	109.408	70.386	52	2.0031	110.649	52	44.256	67.4783	52	46.728	98.852	52	0.075	106.876	52	7.3907	87.959	52	10.386	118.538	52	17.3256	83.262	52	0	88.949	52	2.7326	104.862	52	116.493	84.394	52	65.31
53	5.905	93.8021				53	6.5959	102.03				53	2.8668	90.421	53	164.994	63.56	53	8.1891	100.997	53	12.815	73.6393	53	68.8107	98.041	53	0	103.559	53	4.6572	83.628	53	12.692	124.851	53	6.6936	91.11	53	0.977	93.741	53	3.6607	104.443	53	137.934	88.004	53	26.424
						54	7.6692	99.6688				54	7.5622	88.259	54	178.856	57.683	54	23.1562	94.0048	54	2.126	79.0324	54	82.5407	96.183	54	0.484	95.641	54	2.4243	80.806	54	16.453	126.384	54	3.5791	95.231	54	3.595	101.034	54	3.5096	104.3	54	105.995	86.1	54	11.886
						55	8.2327	91.9271				55	19.7148	89.421	55	141.423	55.66	55	47.8746	89.3345	55	0.059	83.7859	55	80.8355	94.896			55	55	1.8487	80.249	55	19.278	126.366	55	3.6791	98.294	55	6.043	105.536	55	2.3703	103.049	55	58.829	88.964	55	8.065
												56	45.7749	89.037	56	86.956	55.1	56	58.4552	85.9112	56	0.25	88.5666	56	55.64	96.53			56	56	1.9993	79.855	56	20.065	118.874	56	4.8873	98.394	56	7.12	104.856	56	1.4878	100.808	56	19.874	94.019	56	14.688
												57	76.6212	86.268	57	47.461	55.134	57	48.7846	82.8425	57	1.043	89.7557	57	25.76	98.51			57	57	3.0991	79.817				57	5.5172	93.227	57	7.715	104.178				57	5.201	95.376	57	31.963
												58	86.1368	86.421	58	38.532	56.553	58	25.8091	82.3513	58	1.812	92.7058	58	14.51	101.04			58	58	4.4188	77.732				58	7.0981	92.257	58	7.641	99.337				58	0.569	97.616	58	48.823
												59	57.7872	85.296	59	30.833	58.928	59	11.6697	79.2581	59	2.698	94.7467	59	20.1	104.53										59	8.6793	93.663	59	7.226	95.542				59	0	98.973	59	40.3
												60	29.7233	83.603	60	13.274	63.476	60	11.9212	82.1177	60	3.906	97.2584	60	30.1	106.51										60	8.8956	95.807	60	7.489	96.942				60	0.119	98.662	60	23.638
												61	13.627	78.426	61	6.139	68.532	61	23.0496	86.4175	61	5.405	98.2784	61	32.45	110.06										61	7.1466	92.861	61	7.993	96.228				61	1.126	100.765	61	12.545
												62	4.0203	71.734	62	2.909	75.673	62	39.4488	92.8367	62	7.368	92.9561	62	23.88	114.53										62	6.4348	90.851	62	8	90.543				62	1.958	102.376	62	13.07
												63	0.8281	64.766	63	1.638	79.001	63	40.4182	99.3522	63	9.264	87.6171	63	13.41	116													63	8.826	82.277				63	2.723	99.184	63	14.707
												64	0	60.744	64	2.226	80.385	64	34.4507	104.389	64	11.424	84.265	64	6.45	116													64	8.24	71.987							64	16.038
												65	0.436	58.041	65	3.079	80.488	65	24.9492	114.602				65	2.47	114.98																						65	16.119
												66	1.7431	61.394	66	3.988	79.99	66	14.8842	125.81				66	0.49	112.47																						66	14.438
												67	2.2741	68.312	67	4	84.123	67	11.3159	132.973				67	0	112.53																						67	11.005
												68	2.9425	77.127	68	4.707	85.304	68	12.2246	135.014				68	0.51	113.49																						68	8.694
												69	3	83.658	69	5	80.659	69	12.1266	129.485				69	2.02	109.94
												70	3	85.391				70	8.6796	127.181				70	4.53	100.88
												71	3.2145	85.661				71	4.4068	125.591
												72	3.0284	88.07				72	2.7343	129.137
												73	3	85.093				73	1.4466	128.843
												74	3	79.942				74	1.3054	121.735
												75	3	79.068				75	2.1464	114.402
												76	3	83.491				76	3.4825	109.123
												77	3.6434	88.591				77	4.6142	105.221
												78	4.8382	92.595
												79	6.0205	96.622
												80	6.3879	100.506
[truncated: 61 more columns]

## Sheet: Binned
			5_FISH	5_PI		8_FISH	8_PI		28_FISH	28_PI		42_FISH	42_PI		37_FISH	37_PI		40_FISH	40_PI		10_FISH	10_PI		6_FISH	6_PI		20_FISH	20_PI		39_FISH	39_PI		41_FISH	41_PI		33_FISH	33_PI		35_FISH	35_PI		9_FISH	9_PI		16_FISH	16_PI		19_FISH	19_PI
		X	Y	Y	X	Y	Y	X	Y	Y	X	Y	Y	X	Y	Y	X	Y	Y	X	Y	Y	X	Y	Y	X	Y	Y	X	Y	Y	X	Y	Y	X	Y	Y	X	Y	Y	X	Y	Y	X	Y	Y	X	Y	Y
0-5		0	3	166	0	4	155	0	3	162	0	4	215	0	7	207	0	7	160	0	6	193	0	4	172	0	8	158	0	6	177	0	2	152	0	8	227	0	12	111	0	8	177	0	6	179	0	5	182
		1.25	3.0162	160.559	1.2987	4.091	155.921	1.2987	3	168.047	1.2987	4.4237	212.923	1.40845	6.1391	228.424	1.40845	7	174.347	1.42857	5.5056	203.028	1.44928	4.85	180.055	1.47059	7	152	1.51515	6	190.32	1.51515	2	162.911	1.51515	7.4	238.48	1.53846	9.207	125.16	1.5625	7	170	1.5625	6.024	166.807	1.5873	5.649	186.938
		2.5	3	162.044	2.5974	4.518	150.247	2.5974	3	169.726	2.5974	3.4821	213.288	2.8169	5.9874	228.603	2.8169	7	170.169	2.85714	5.8944	206.367	2.89855	4.717	178.194	2.94118	6	139	3.0303	6	187.96	3.0303	1.578	174.165	3.0303	7.88	229.04	3.07692	7.501	136.36	3.125	7	161	3.125	6.246	163.114	3.1746	5.935	186.432
		3.75	3	151.891	3.8961	5.4949	151.138	3.8961	2.7885	161.468	3.8961	3.0419	191.48	4.22535	5.1977	222.024	4.22535	7	153.061	4.28571	5.3167	202.701	4.34783	3.606	160.241	4.41176	7	118	4.54545	5.68	176.64	4.54545	1.874	181.51	4.54545	7.72	207.32	4.61538	7.507	145.386	4.6875	6	140	4.6875	6.015	155.198	4.7619	6.846	181.951
		5	3.2105	137.977
Average			3.04534	155.694		4.52598	153.077		2.94712	165.31		3.73692	208.173		6.08105	221.513		7	164.394		5.67918	201.274		4.29325	172.623		7	141.75		5.92	182.98		1.863	167.647		7.75	225.46		9.05375	129.477		7	162		6.07125	166.03		5.8575	184.33
5-10		6.25	3.1491	126.121	5.19481	6	154.846	5.19481	2.0514	152.2	5.19481	2.0888	166.751	5.6338	5	207.96	5.6338	7.859	132.819	5.71429	5	191.968	5.7971	3.434	142.986	5.88235	11	106	6.06061	4.8	156.4	6.06061	2	181.204	6.06061	7.8	182.16	6.15385	7.724	151.156	6.25	7	116	6.25	6.835	141.628	6.34921	7.795	160.126
		7.5	2.929	114.003	6.49351	6	158.342	6.49351	2.2596	142.047	6.49351	2.8943	148.463	7.04225	5.4702	187.179	7.04225	8.564	117.99	7.14286	4.5279	177.767	7.24638	4.521	125.177	7.35294	18	97	7.57576	4	132	7.57576	2	173.22	7.57576	8	156	7.69231	8	150.606	7.8125	7	99	7.8125	7.089	131.417	7.93651	8	133.724
		8.75	3.0767	101.44	7.79221	6	159.677	7.79221	3	130.065	7.79221	3.6439	127.151	8.4507	7.2874	163.138	8.4507	8.421	97.878	8.57143	4	164.054	8.69565	6.325	110.056	8.82353	28	84	9.09091	5.88	112.72	9.09091	2	159.499	9.09091	10.28	139.2	9.23077	8	141.222	9.375	7	88	9.375	7.602	118.418	9.52381	7.308	111.316
		10	2.4105	93.428	9.09091	6	142.875	9.09091	3	113.992	9.09091	5.2225	109.911	9.85915	9.0762	139.564	9.85915	8.039	82.551	10	4.0341	147.139
Average			2.89133	108.748		6	153.935		2.57775	134.576		3.46238	138.069		6.70845	174.46		8.22075	107.809		4.3905	170.232		4.76	126.073		19	95.6667		4.89333	133.707		2	171.308		8.69333	159.12		7.908	147.661		7	101		7.17533	130.488		7.701	135.055
10-15		11.25	2.0828	89.853	10.3896	6	132.903	10.3896	3	100.463	10.3896	8.3472	93.429	11.2676	10.6352	117.668	11.2676	7.282	74.603	11.4286	4.6675	130.942	10.1449	6.039	96.953	10.2941	39	74	10.6061	7.6	102.8	10.6061	1.534	140.95	10.6061	12.6	129.8	10.7692	7.999	125.158	10.9375	8	81	10.9375	8.271	104.445	11.1111	5.642	94.501
		12.5	2	87.689	11.6883	6.4885	128.069	11.6883	3	90.3	11.6883	9.8002	89.423	12.6761	11.9703	93.562	12.6761	6.317	68.903	12.8571	6.0274	119.46	11.5942	6.657	86.541	11.7647	41	69	12.1212	7.92	93.4	12.1212	1	122.563	12.1212	15.6	122.2	12.3077	7.44	106.879	12.5	7	81	12.5	8.928	88.89	12.6984	4.411	84.814
		13.75	2.4355	88.785	12.987	6.3078	120.556	12.987	3	81.28	12.987	8.1581	88.571	14.0845	11.3815	78.509	14.0845	6	64.001	14.2857	7.3638	112.734	13.0435	6.703	78.013	13.2353	30	66	13.6364	7.28	81.32	13.6364	1	109.177	13.6364	17.64	115.56	13.8462	6.982	91.3242	14.0625	7	86	14.0625	9.536	75.649	14.2857	4.083	80.273
		15	3	90.568	14.2857	6	112.921	14.2857	3	74.84	14.2857	5.0485	87.098										14.4928	6.804	75.615	14.7059	18	64
Average			2.37957	89.2237		6.19908	123.612		3	86.7208		7.8385	89.6303		11.329	96.5797		6.533	69.169		6.01957	121.045		6.55075	84.2805		32	68.25		7.6	92.5067		1.178	124.23		15.28	122.52		7.47367	107.787		7.33333	82.6667		8.91167	89.6613		4.712	86.5293
15-20		16.25	3	89.112	15.5844	6	116.858	15.5844	3	72.611	15.5844	3.2587	88.098	15.493	9.7417	72.732	15.493	7.095	63.878	15.7143	11.1389	110.2	15.942	7.605	75.852	16.1765	11	65	15.1515	6	75	15.1515	1	98.695	15.1515	16	117	15.3846	6.966	80.2056	15.625	7	88	15.625	9.858	68.709	15.873	4	80.395
		17.5	3	88.241	16.8831	6	117.184	16.8831	3	69.204	16.8831	3	89.651	16.9014	7.4594	73.871	16.9014	11.538	70.87	17.1429	14.3703	106.041	17.3913	7.212	77.365	17.6471	8.102	69.3939	16.6667	6	77.24	16.6667	1.59	95.082	16.6667	12.08	106.96	16.9231	6.062	69.4476	17.1875	7	87	17.1875	9.937	65.966	17.4603	4	81.313
		18.75	3	89.77	18.1818	5.3513	112.383	18.1818	2.5399	66.856	18.1818	3.6433	92.852	18.3099	5.773	78.074	18.3099	19.458	80.181	18.5714	17.1857	103.234	18.8406	6.787	82.258	19.1176	8.137	72.6228	18.1818	5.52	75.84	18.1818	2	91.772	18.1818	8.44	101.12	18.4615	6.145	62.4725	18.75	6	83	18.75	10	62	19.0476	4	80.105
		20	3.1974	92.316	19.4805	5.9553	110.642	19.4805	2.0573	68.337	19.4805	5.9817	95.041	19.7183	4.8778	84.437	19.7183	27.871	85.319	20	15.3159	97.873							19.697	5.08	74.96	19.697	2	88.415	19.697	6.72	97.92	20	6.464	58.8996
Average			3.04935	89.8597		5.82665	114.267		2.6493	69.252		3.97093	91.4105		6.96298	77.2785		16.4905	75.062		14.5027	104.337		7.20133	78.4917		9.07967	69.0056		5.65	75.76		1.6475	93.491		10.81	105.75		6.40925	67.7563		6.66667	86		9.93167	65.5583		4	80.6043
20-25		21.25	3.6494	93.652	20.7792	8.0632	112.125	20.7792	2.7945	71.062	20.7792	8.6512	94.586	21.1268	4.3691	90.615	21.1268	28.923	91.996	21.4286	11.1459	92.489	20.2899	6.96	85.578	20.5882	9.839	72.9084	21.2121	4	76.24	21.2121	2	80.814	21.2121	5.88	96.16	21.5385	6	56.7055	20.3125	7	81	20.3125	10	59.917	20.6349	4.666	79.148
		22.5	3.4427	95.902	22.0779	10.0047	106.76	22.0779	3	73.909	22.0779	8.6811	91.749	22.5352	4.8063	92.918	22.5352	21.185	93.779	22.8571	7.7145	88.107	21.7391	7.972	86.335	22.0588	10.124	75.0604	22.7273	4	76	22.7273	2	76.277	22.7273	6	99	23.0769	6	56.4728	21.875	7	82	21.875	9.99	62.53	22.2222	6.927	78.415
		23.75	4	99.828	23.3766	11.9461	103.972	23.3766	3.0177	77.296	23.3766	6.5273	86.033	23.9437	5	87.386	23.9437	13.839	97.57	24.2857	5.1244	88.449	23.1884	9.02	84.213	23.5294	9.992	77.6437	24.2424	4.12	74.2	24.2424	2	71.032	24.2424	6.059	100.723	24.6154	5.936	59.2729	23.4375	8	83	23.4375	10	70.138	23.8095	9.302	72.447
		25	3.9911	98.865	24.6753	12.2499	102.736	24.6753	3.2637	77.729	24.6753	4.3097	81.403										24.6377	8.62	80.127	25	9.16	79.1591													25	8	80	25	10	75.881
Average			3.7708	97.0618		10.566	106.398		3.01898	74.999		7.04232	88.4428		4.72513	90.3063		21.3157	94.4483		7.99493	89.6817		8.143	84.0632		9.77875	76.1929		4.04	75.48		2	76.041		5.97967	98.6277		5.97867	57.4837		7.5	81.5		9.9975	67.1165		6.965	76.67
25-30		26.25	3.5001	95.501	25.974	10.5854	99.0659	25.974	3.0964	76.896	25.974	2.9191	78.622	25.3521	5.0791	82.825	25.3521	8.334	103.024	25.7143	4.1289	87.241	26.087	7.419	77.567	26.4706	8.295	76.9293	25.7576	4	75.8	25.7576	1.725	65.039	25.7576	7.721	99.298	26.1538	6.185	64.0277	26.5625	8.269	79.4848	26.5625	9.915	76.872	25.3968	11.158	66.404
		27.5	3.2127	94.805	27.2727	8.4928	103.671	27.2727	3.352	76.064	27.2727	1.8504	77.265	26.7606	5	80.235	26.7606	5.443	97.883	27.1429	3.6368	85.519	27.5362	5.24	77.683	27.9412	7.535	77.7606	27.2727	4	74.48	27.2727	1.245	61.126	27.2727	8.502	91.811	27.6923	5.926	69.0111	28.125	8.539	80.6184	28.125	9.107	82.209	26.9841	11.073	64.183
		28.75	3.9218	94.066	28.5714	7.5682	105.262	28.5714	3	78.071	28.5714	1.149	76.873	28.169	5.1746	81.01	28.169	5	85.744	28.5714	3.7903	86.092	28.9855	4.095	76.534	29.4118	7.843	75.4425	28.7879	4	70.6	28.7879	1.869	61.328	28.7879	8.488	90.931	29.2308	6.263	72.8424	29.6875	8.965	78.6916	29.6875	8.259	92.687	28.5714	8.601	68.563
		30	4	91.53	29.8701	7.0398	107.656	29.8701	3	81.399	29.8701	1	75.935	29.5775	5.6833	88.131	29.5775	5	77.545	30	4	84.449
Average			3.65865	93.9755		8.42155	103.914		3.1121	78.1075		1.72962	77.1737		5.23425	83.0503		5.94425	91.049		3.889	85.8252		5.58467	77.2613		7.891	76.7108		4	73.6267		1.613	62.4977		8.237	94.0133		6.12467	68.6271		8.591	79.5983		9.09367	83.9227		10.2773	66.3833
30-35		31.25	4	92.518	31.1688	7	106.694	31.1688	3	83.556	31.1688	1.6654	72.83	30.9859	6	95.192	30.9859	5.821	74.177	31.4286	4	84.262	30.4348	4	75.321	30.8824	7.495	71.6112	30.303	4	67	30.303	2	62.272	30.303	10.682	93.985	30.7692	6.533	74.5646	31.25	9.708	74.1802	31.25	7.484	101.896	30.1587	4.957	76.303
		32.5	4	96.866	32.4675	7	101.367	32.4675	3	85.065	32.4675	2	72.486	32.3944	6	107.14	32.3944	6.895	75.968	32.8571	3.5918	84.161	31.8841	4	73.51	32.3529	7	70.7242	31.8182	4.921	71.381	31.8182	2.472	60.488	31.8182	13.024	97.986	32.3077	7.94	74.0207	32.8125	11.347	70.7859	32.8125	6.908	100.283	31.746	3.762	85.492
		33.75	4	93.967	33.7662	6.9707	102.957	33.7662	3	86.02	33.7662	2	77.841	33.8028	5.7905	113.885	33.8028	7.334	81.442	34.2857	3.2434	82.894	33.3333	3.66	74.11	33.8235	6.545	71.7615	33.3333	5	74.849	33.3333	3.467	59.879	33.3333	11.508	101.56	33.8462	8.064	74.7676	34.375	11.259	69.1781	34.375	8.434	97.095	33.3333	3.013	94.124
		35	4	88.779																												34.8485	5.191	59.439	34.8485	8.259	102.835										34.9206	3.659	100.43
Average			4	93.0325		6.99023	103.673		3	84.8803		1.88847	74.3857		5.93017	105.406		6.68333	77.1957		3.61173	83.7723		3.88667	74.3137		7.01333	71.3656		4.64033	71.0767		3.2825	60.5195		10.8682	99.0915		7.51233	74.451		10.7713	71.3814		7.60867	99.758		3.84775	89.0873
35-40		36.25	3.3375	89.117	35.0649	5.934	103.938	35.0649	3	85.161	35.0649	2	84.626	35.2113	5.2818	113.196	35.2113	7	87.012	35.7143	3.1721	85.785	34.7826	3	76.79	35.2941	6	71.3442	34.8485	4.674	76.113	36.3636	7.088	61.396	36.3636	6.807	110.387	35.3846	7.278	74.2212	35.9375	10.969	67.5412	35.9375	12.746	95.435	36.5079	3.994	103.621
		37.5	3.0534	93.021	36.3636	5.0736	102.171	36.3636	3	84.326	36.3636	2	90.922	36.6197	5.3662	110.475	36.6197	7	90.828	37.1429	3.1009	92.567	36.2319	2.925	77.763	36.7647	6	69.0377	36.3636	4.27	74.377	37.8788	6.873	65.773	37.8788	5.383	121.247	36.9231	7	72.7412	37.5	9.748	66.9596	37.5	18.615	92.67	38.0952	5.808	105.504
		38.75	3.1575	94.904	37.6623	5	96.1354	37.6623	3	86.235	37.6623	1.5129	96.466	38.0282	5.7137	105.964	38.0282	7.249	93.343	38.5714	3.5977	98.253	37.6812	2.366	75.79	38.2353	6.254	67.6703	37.8788	3.959	74.568	39.3939	5.405	74.772	39.3939	4.085	128.277	38.4615	6.835	73.469	39.0625	7.47	70.5418	39.0625	24.939	86.44	39.6825	6.331	98.818
		40	3	95.494	38.961	4.6038	90.7235	38.961	3	87.65	38.961	1.8044	104.193	39.4366	6.073	99.928	39.4366	7.77	88.457	40	3.9826	101.766	39.1304	2	75.451	39.7059	6.627	70.5653	39.3939	3.07	84.836							40	7	72.8307
Average			3.1371	93.134		5.15285	98.2419		3	85.843		1.82933	94.0517		5.60867	107.391		7.25475	89.91		3.46332	94.5927		2.57275	76.4485		6.22025	69.6544		3.99325	77.4735		6.45533	67.3137		5.425	119.97		7.02825	73.3155		9.39567	68.3475		18.7667	91.515		5.37767	102.648
40-45		41.25	3.0256	93.932	40.2597	4.0876	91.4209	40.2597	3	90.888	40.2597	2	111.429	40.8451	5.9338	96.156	40.8451	7.758	83.628	41.4286	4	105.902	40.5797	2	77.628	41.1765	4.881	72.9132	40.9091	3.661	87.661	40.9091	3.498	79.024	40.9091	4.369	126.982	41.5385	7	71.1836	40.625	5.982	74.8759	40.625	26.908	79.493	41.2698	6.939	94.169
		42.5	3.3453	89.884	41.5584	4.6971	88.341	41.5584	3	96.119	41.5584	2	113.507	42.2535	6	92.928	42.2535	7.003	79.121	42.8571	3.8936	109.733	42.029	2	79.509	42.6471	3.962	71.5884	42.4242	4.47	86.976	42.4242	2	79.353	42.4242	6.436	120.511	43.0769	6.995	71.0131	42.1875	5.809	80.6423	42.1875	22.848	75.968	42.8571	8.633	91.784
		43.75	3.8866	86.568	42.8571	4.9375	86.8607	42.8571	2.5123	98.734	42.8571	2.5819	112.732	43.662	6	90.153	43.662	7	74.536	44.2857	3.7446	112.726	43.4783	2.16	84.13	44.1176	3.015	72.1535	43.9394	5.36	88.111	43.9394	2.028	81.468	43.9394	7.762	114.728	44.6154	6.653	72.7245	43.75	5.519	83.5906	43.75	14.985	73.609	44.4444	9.736	93.452
		45	5.1521	85.779	44.1558	5.0103	86.2417	44.1558	2.0351	97.745	44.1558	3.5616	109.402										44.9275	2.994	85.253
Average			3.8524	89.0408		4.68313	88.2161		2.63685	95.8715		2.53587	111.767		5.97793	93.079		7.25367	79.095		3.8794	109.454		2.2885	81.63		3.95267	72.2184		4.497	87.5827		2.50867	79.9483		6.189	120.74		6.88267	71.6404		5.77	79.7029		21.5803	76.3567		8.436	93.135
45-50		46.25	6.977	87.315	45.4545	5	81.3362	45.4545	2.1416	95.86	45.4545	3.5997	104.257	45.0704	6	88.837	45.0704	6.959	73.213	45.7143	3.6734	115.531	46.3768	2.192	84.691	45.5882	4.426	73.3997	45.4545	7.133	88.087	45.4545	2.871	82.278	45.4545	8.269	107.071	46.1538	6.911	78.471	45.3125	5.29	84	45.3125	8.303	69.314	46.0317	8.403	95.514
		47.5	6.9092	91.447	46.7532	4.171	79.2629	46.7532	2	95.328	46.7532	2.939	102.944	46.4789	6	87.448	46.4789	7	73.871	47.1429	3.6021	116.148	47.8261	2.192	83.938	47.0588	9.106	73.6407	46.9697	10.158	87.481	46.9697	4.187	79.992	46.9697	7.194	103.558	47.6923	6.006	80.2919	46.875	4.939	83.5983	46.875	5.564	72.097	47.619	6.526	96.579
		48.75	6.6247	94.239	48.0519	4	79.8119	48.0519	2	95.476	48.0519	2.2541	102.587	47.8873	6	89.328	47.8873	7.87	75.302	48.5714	3.5309	116.658	49.2754	2.055	85.364	48.5294	18.258	75.3399	48.4848	13.819	83.452	48.4848	5.38	80.83	48.4848	7.435	99.773	49.2308	6.91	79.6651	48.4375	4.087	81.4266	48.4375	8.689	75.443	49.2063	6	98.671
		50	5.4066	96.814	49.3506	4	80.9806	49.3506	2	94.126	49.3506	1.7136	95.154	49.2958	6	89.943	49.2958	10.274	74.873	50	3.765	119.236	50.7246	2	87.277	50	31.072	78.1994	50	14.486	79.6	50	6	82.679	50	7.308	99.673				50	2.455	80.1288	50	14.705	77.197
Average			6.47938	92.4537		4.29275	80.3479		2.0354	95.1975		2.6266	101.236		6	88.889		8.02575	74.3148		3.64285	116.893		2.10975	85.3175		15.7155	75.1449		11.399	84.655		4.6095	81.4447		7.5515	102.519		6.609	79.476		4.772	83.0083		7.51867	72.2847		6.97633	96.9213
50-55		51.25	5.8109	98.321	50.6494	4	80.393	50.6494	2.1986	92.603	50.6494	1	91.623	50.7042	5.9737	94.542	50.7042	13.612	76.279	51.4286	4	121.3	52.1739	2.252	88.137	51.4706	31.383	77.7044	51.5152	12.633	80.264	51.5152	5.163	84.397	51.5152	8.264	99.931	50.7692	8.478	74.7584	51.5625	1.467	79.59	51.5625	24.444	81.917	50.7937	5.327	102.434
		52.5	6.7462	96.877	51.9481	3.3296	75.3359	51.9481	3.427	89.239	51.9481	1.0046	92.844	52.1127	5.673	99.222	52.1127	15.423	79.441	52.8571	4	120.751	53.6232	3.535	84.184	52.9412	22.276	76.2366	53.0303	9.714	82.279	53.0303	4.024	93.739	53.0303	9.429	98.021	52.3077	9.442	72.1818	53.125	0	76.879	53.125	33.666	84.266	52.381	4.86	103.967
		53.75	10.3345	100.179	53.2468	3.0059	70.8521	53.2468	6.4673	84.029	53.2468	2.3045	90.583	53.5211	5.937	100.901	53.5211	15.141	83.317	54.2857	3.5796	118.902				54.4118	16.042	74.0432	54.5455	6.348	82.787	54.5455	3.087	97.188	54.5455	9.836	96.353	53.8462	9.614	69.9841	54.6875	0.277	80.0567	54.6875	28.61	84.158	53.9683	4.558	101.569
		55	13.6272	100.552	54.5455	3	68.9686	54.5455	9.3327	82.124	54.5455	5.2692	80.989	54.9296	6.438	100.721	54.9296	12.885	84.827
Average			9.1297	98.9822		3.33387	73.8874		5.3564	86.9988		2.39457	89.0097		6.00542	98.8465		14.2652	80.966		3.85987	120.318		2.8935	86.1605		23.2337	75.9947		9.565	81.7767		4.09133	91.7747		9.17633	98.1017		9.178	72.3081		0.581333	78.8419		28.9067	83.447		4.915	102.657
55-60		56.25	15.5806	100.384	55.8442	3	74.9241	55.8442	9.5561	81.806	55.8442	8.9082	78.035	56.338	6.9788	102.034	56.338	10.864	87.662	55.7143	3.1747	118.786	55.0725	4.425	80.236	55.8824	19.379	72.0243	56.0606	3.485	92.61	56.0606	2.33	97.494	56.0606	12.361	95.958	55.3846	9.042	70.1063	56.25	0.08	79.4431	56.25	15.146	82.933	55.5556	4.328	100.661
		57.5	12.2845	97.681	57.1429	3.5105	84.4999	57.1429	7.5271	81.312	57.1429	11.3387	82.494	57.7465	6.9669	102.178	57.7465	9.358	93.405	57.1429	3.1034	118.78	56.5217	5.473	74.8	57.3529	46.956	73.4447	57.5758	1.256	94.885	57.5758	2	99.7	57.5758	39.615	98.276	56.9231	7.341	68.392	57.8125	0	78.2314	57.8125	5.5	79.916	57.1429	3.58	102.659
		58.75	8.1729	96.494	58.4416	3.8578	93.8522	58.4416	5.3061	81.977	58.4416	11.0563	90.443	59.1549	5.5902	104.109	59.1549	8.115	90.343	58.5714	3.0322	116.511	57.971	7.171	72.241	58.8235	115.238	74.378	59.0909	0	93.482	59.0909	2.701	100.583	59.0909	87.21	109.771	58.4615	5.182	66.8214	59.375	0	78.1137	59.375	2.906	77.768	58.7302	2.61	100.932
		60	5.2725	99.556	59.7403	3.7177	106.776	59.7403	2.574	85.765	59.7403	8.2708	92.5							60	3	115.316	59.4203	6.529	73.48													60	4.045	67.2843
Average			10.3276	98.5287		3.5215	90.0132		6.24083	82.715		9.8935	85.868		6.51197	102.774		10.111	90.5335		3.07757	117.348		5.8995	75.1893		60.5243	73.2823		1.58033	93.659		2.34367	99.259		46.3953	101.335		6.4025	68.151		0.0266667	78.5961		7.85067	80.2057		3.506	101.417
60-65		61.25	3.4342	97.896	61.039	3.4156	115.195	61.039	0.8126	88.787	61.039	5.0991	93.938	60.5634	3.9262	106.422	60.5634	8.481	82.448	61.4286	3	111.809	60.8696	7.717	73.514	60.2941	201.481	75.111	60.6061	0	92.836	60.6061	4.835	98.013	60.6061	124.556	120.129	61.5385	2.597	67.1293	60.9375	0	80.0197	60.9375	4.677	80.157	60.3175	1.707	93.868
		62.5	2.4336	95.405	62.3377	2.8903	119.864	62.3377	0	91.228	62.3377	3.4437	99.101	61.9718	2.2095	104.685	61.9718	8	82.9	62.8571	2.9015	107.496	62.3188	10.258	74.42	61.7647	230.151	76.1242	62.1212	0	87.662	62.1212	10.39	92.327	62.1212	113.638	125.345	63.0769	0.983	66.8786	62.5	0	86.0195	62.5	14.78	83.24	61.9048	1.122	86.603
		63.75	1.2767	95.816	63.6364	2.3852	124.798	63.6364	0	90.438	63.6364	2.5874	105.126	63.3803	1.5028	108.009	63.3803	7.833	84.906	64.2857	2.7472	106.248	63.7681	12.926	75.529	63.2353	186.518	76.6363	63.6364	0	84.794	63.6364	14.228	88.187	63.6364	66.556	128.195	64.6154	1.014	64.1748	64.0625	0	90.8946	64.0625	34.286	82.798	63.4921	1	84.44
		65	1.5064	93.274	64.9351	1.1663	127.385	64.9351	0	84.098	64.9351	1.875	109.104	64.7887	0.4304	110.674	64.7887	7.059	84.704							64.7059	97.758	73.9225
Average			2.16273	95.5977		2.46435	121.81		0.20315	88.6377		3.2513	101.817		2.01722	107.447		7.84325	83.7395		2.8829	108.518		8.9875	73.967		178.977	75.4485		0	88.4307		7.6125	95.17		101.583	124.556		1.53133	66.0609		0	85.6446		17.9143	82.065		1.27633	88.3037
65-70		66.25	2.8668	90.421	66.2338	1.0517	120.283	66.2338	0.0849	82.715	66.2338	1	114.901	66.1972	0	112.209	66.1972	6.137	87.685	65.7143	3.213	104.713	65.2174	11.312	78.902	66.1765	41.626	70.5665	65.1515	0	86.71	65.1515	15.524	86.047	65.1515	27.658	126.596	66.1538	4.675	62.7414	65.625	1.947	87.5123	65.625	62.85	80.188	65.0794	0.834	84.792
		67.5	7.5622	88.259	67.5325	2.0031	110.649	67.5325	1.0593	77.057	67.5325	1	117.001	67.6056	0	108.359	67.6056	4.656	91.271	67.1429	5.5316	103.296	66.6667	7.056	80.51	67.6471	41.41	66.2322	66.6667	0.693	86.733	66.6667	18.332	81.661	66.6667	15.847	120.153	67.6923	14.222	67.3692	67.1875	7.177	84.2175	67.1875	92.934	79.291	66.6667	0.096	83.531
		68.75	19.7148	89.421	68.8312	8.1891	100.997	68.8312	2.0937	75.256	68.8312	1	114.381	69.0141	0.1575	102.256	69.0141	2.656	97.31	68.5714	11.3942	104.911	68.1159	2.484	81.632	69.1176	63.8	60.1038	68.1818	1.543	82.113	68.1818	27.38	73.689	68.1818	13.409	112.6	69.2308	40.069	73.32	68.75	15.407	80.4488	68.75	116.905	75.321	68.254	0	82.746
		70	45.7749	89.037																70	19.4983	107.357	69.5652	1.162	79.15				69.697	2.654	77.821	69.697	46.515	66.434	69.697	10.196	107.82										69.8413	0.047	82.045
Average			18.9797	89.2845		3.74797	110.643		0.5721	79.886		1	115.428		0.0525	107.608		5.3965	89.478		9.90928	105.069		5.5035	80.0485		41.518	68.3993		1.2225	83.3442		26.9378	76.9578		16.7775	116.792		9.4485	65.0553		4.562	85.8649		77.892	79.7395		0.24425	83.2785
70-75		71.25	76.6212	86.268	70.1299	23.1562	94.0048	70.1299	5.0894	74.027	70.1299	1	110.476	70.4225	3.3379	92.001	70.4225	1.855	103.389	71.4286	22.6005	106.214	71.0145	3.726	78.553	70.5882	122.966	60.5502	71.2121	5.219	76.814	71.2121	59.08	60.268	71.2121	6.117	104.949	70.7692	95.721	75.4125	70.3125	26.372	77.7464	70.3125	133.432	73.627	71.4286	0.067	79.503
		72.5	86.1368	86.421	71.4286	47.8746	89.3345	71.4286	15.7909	76.246	71.4286	1	95.526	71.831	15.5072	79.345	71.831	2.961	105.681	72.8571	27.2441	101.739	72.4638	15.062	78.711	72.0588	185.246	58.8763	72.7273	10.06	72.945	72.7273	47.3	54.802	72.7273	4.086	102.082	72.3077	178.733	74.0746	71.875	45.614	72.9746	71.875	119.623	74.997	73.0159	0	76.299
		73.75	57.7872	85.296	72.7273	58.4552	85.9112	72.7273	32.1196	79.042	72.7273	1	84.894	73.2394	32.9073	70.818	73.2394	12.47	104.05	74.2857	46.728	98.852	73.913	48.258	76.549	73.5294	181.699	57.0663	74.2424	19.418	68.151	74.2424	22.057	50.981	74.2424	5.603	95.831	73.8462	235.542	70.0246	73.4375	86.712	67.2664	73.4375	81.951	75.166	74.6032	0	75.526
		75	29.7233	83.603	74.026	48.7846	82.8425	74.026	40.8799	80.26	74.026	2.0939	75.122	74.6479	46.136	63.279	74.6479	46.16	102.96							75	126.657	55.0008													75	154.39	62.7939	75	42.406	74.754
Average			62.5671	85.397		44.5677	88.0232		23.4699	77.3937		1.27347	91.5045		24.4721	76.3607		15.8615	104.02		32.1909	102.268		9.394	78.632		154.142	57.8734		11.5657	72.6367		53.19	57.535		5.26867	100.954		169.999	73.1706		78.272	70.1953		94.353	74.636		0.0223333	77.1093
75-80		76.25	13.627	78.426	75.3247	25.8091	82.3513	75.3247	35.4758	79.279	75.3247	6.0943	68.949	76.0563	45.7988	59.738	76.0563	120.999	98.322	75.7143	68.8107	98.041	75.3623	109.408	70.386	76.4706	65.31	54.0418	75.7576	54.594	61.131	75.7576	7.958	49.299	75.7576	16.124	86.559	75.3846	230.741	66.1902	76.5625	204.174	59.9271	76.5625	18.98	74.231	76.1905	1.666	72.449
		77.5	4.0203	71.734	76.6234	11.6697	79.2581	76.6234	18.9301	75.608	76.6234	15.5466	67.987	77.4648	45.2271	56.439	77.4648	216.508	93.944	77.1429	82.5407	96.183	76.8116	164.994	63.56	77.9412	26.424	56.6954	77.2727	139.65	51.643	77.2727	7.395	50.165	77.2727	42.831	76.295	76.9231	141.777	64	78.125	196.407	60.8189	78.125	6.407	80.305	77.7778	8.578	73.378
		78.75	0.8281	64.766	77.9221	11.9212	82.1177	77.9221	10.4032	73.276	77.9221	21.4384	65.809	78.8732	53.6502	53.074	78.8732	229.908	83.809	78.5714	80.8355	94.896	78.2609	178.856	57.683	79.4118	11.886	60.7006	78.7879	225.067	46.59	78.7879	16.308	54.038	78.7879	65.601	70.439	78.4615	77.693	64.2041	79.6875	112.484	64.2105	79.6875	1.137	86.694	79.3651	26.65	76.609
		80	0	60.744	79.2208	23.0496	86.4175	79.2208	8.0035	75.596	79.2208	15.5863	62.049							80	55.64	96.53	79.7101	141.423	55.66													80	41.169	66.3386
Average			4.61885	68.9175		18.1124	82.5362		18.2032	75.9398		14.6664	66.1985		48.2254	56.417		189.138	92.025		71.9567	96.4125		148.67	61.8222		34.54	57.1459		97.122	56.387		10.5537	51.1673		41.5187	77.7643		122.845	65.1832		171.022	61.6522		8.84133	80.41		12.298	74.1453
80-85		81.25	0.436	58.041	80.5195	39.4488	92.8367	80.5195	9.132	77.072	80.5195	8.1582	58.502	80.2817	70.1559	53.141	80.2817	143.955	69.789	81.4286	25.76	98.51	81.1594	86.956	55.1	80.8824	8.065	65.3731	80.303	248.473	43.074	80.303	43.247	59.248	80.303	66.857	68.613	81.5385	22.372	69.9609	81.25	44.256	67.4783	81.25	0	88.949	80.9524	62.019	79.732
		82.5	1.7431	61.394	81.8182	40.4182	99.3522	81.8182	10.2514	79.645	81.8182	4.4487	55.743	81.6901	75.5589	54.376	81.6901	64.018	65.281	82.8571	14.51	101.04	82.6087	47.461	55.134	82.3529	14.688	65.5513	81.8182	139.416	40.863	81.8182	105.296	64.442	81.8182	54.918	69.027	83.0769	17.174	74.5905	82.8125	12.815	73.6393	82.8125	0.977	93.741	82.5397	116.493	84.394
		83.75	2.2741	68.312	83.1169	34.4507	104.389	83.1169	9.1669	86.864	83.1169	3.1517	56.154	83.0986	71.9678	56.395	83.0986	23.582	68.035	84.2857	20.1	104.53	84.058	38.532	56.553	83.8235	31.963	65.5871	83.3333	56.838	40.974	83.3333	195.065	71.591	83.3333	53.822	73.277	84.6154	18.742	80.815	84.375	2.126	79.0324	84.375	3.595	101.034	84.127	137.934	88.004
		85	2.9425	77.127	84.4156	24.9492	114.602	84.4156	9.9951	93.292	84.4156	1.9718	58.289	84.507	62.7003	61.283	84.507	10.769	71.418										84.8485	22.805	45.879	84.8485	247.067	80.704	84.8485	79.388	80.682
Average			1.84892	66.2185		34.8167	102.795		9.63635	84.2182		4.4326	57.172		70.0957	56.2987		60.581	68.6308		20.1233	101.36		67.2085	55.117		18.2387	65.5038		116.883	42.6975		147.669	68.9963		63.7463	72.8997		19.4293	75.1221		19.7323	73.3833		0.4885	91.345		105.482	84.0433
85-90		86.25	3	83.658	85.7143	14.8842	125.81	85.7143	11.0707	99.372	85.7143	0.7501	63.216	85.9155	55.3389	68.365	85.9155	9.037	79.773	85.7143	30.1	106.51	85.5072	30.833	58.928	85.2941	48.823	68.1439	86.3636	10.129	55.375	86.3636	190.314	87.854	86.3636	112.064	88.437	86.1538	15.98	83.8046	85.9375	0.059	83.7859	85.9375	6.043	105.536	85.7143	105.995	86.1
		87.5	3	85.391	87.013	11.3159	132.973	87.013	11.2654	107.511	87.013	0.4173	70.845	87.3239	43.9645	76.865	87.3239	8.269	90.776	87.1429	32.45	110.06	86.9565	13.274	63.476	86.7647	40.3	63.71	87.8788	3.357	68.062	87.8788	79.618	92.674	87.8788	115.018	97.619	87.6923	8.8	88.6355	87.5	0.25	88.5666	87.5	7.12	104.856	87.3016	58.829	88.964
		88.75	3.2145	85.661	88.3117	12.2246	135.014	88.3117	8.6805	111.369	88.3117	0.0845	77.597	88.7324	27.1546	83.252	88.7324	8.847	99.473	88.5714	23.88	114.53	88.4058	6.139	68.532	88.2353	23.638	58.5372	89.3939	0.651	79.827	89.3939	18.123	96.667	89.3939	68.71	106.622	89.2308	3.193	91.9563	89.0625	1.043	89.7557	89.0625	7.715	104.178	88.8889	19.874	94.019
		90	3.0284	88.07	89.6104	12.1266	129.485	89.6104	5.4646	106.667	89.6104	0.2036	82.476							90	13.41	116	89.8551	2.909	75.673	89.7059	12.545	55.6048
Average			3.06073	85.695		12.6378	130.82		9.1203	106.23		0.363875	73.5335		42.1527	76.1607		8.71767	90.0073		24.96	111.775		13.2888	66.6522		31.3265	61.499		4.71233	67.7547		134.966	90.264		98.5973	97.5593		9.32433	88.1321		0.450667	87.3694		6.5815	105.196		61.566	89.6943
90-95		91.25	3	85.093	90.9091	8.6796	127.181	90.9091	2.8625	104.909	90.9091	1	88.874	90.1408	14.0903	87.219	90.1408	9.691	104.271	91.4286	6.45	116	91.3043	1.638	79.001	91.1765	13.07	55.4772	90.9091	0	86.062	90.9091	2.951	97.011	90.9091	30.459	110.016	90.7692	1.207	92.5717	90.625	1.812	92.7058	90.625	7.641	99.337	90.4762	5.201	95.376
		92.5	3	79.942	92.2078	4.4068	125.591	92.2078	1.6424	98.676	92.2078	1	90.824	91.5493	5.134	92.365	91.5493	12.683	102.049	92.8571	2.47	114.98	92.7536	2.226	80.385	92.6471	14.707	56.3601	92.4242	0	84.684	92.4242	0.606	96.003	92.4242	18.835	111.959	92.3077	1.355	96.0277	92.1875	2.698	94.7467	92.1875	7.226	95.542	92.0635	0.569	97.616
		93.75	3	79.068	93.5065	2.7343	129.137	93.5065	1.6813	92.106	93.5065	1	90.081	92.9577	1.2137	97.524	92.9577	17.274	98.19	94.2857	0.49	112.47	94.2029	3.079	80.488	94.1176	16.038	58.8627	93.9394	0	79.984	93.9394	0	94.954	93.9394	17.591	115.256	93.8462	3.262	100.728	93.75	3.906	97.2584	93.75	7.489	96.942	93.6508	0	98.973
		95	3	83.491	94.8052	1.4466	128.843	94.8052	2	85.825	94.8052	1	93.082	94.3662	0	99.688	94.3662	19.678	101.303
Average			3	81.8985		4.31683	127.688		2.04655	95.379		1	90.7152		6.81267	92.3693		13.216	101.503		3.13667	114.483		1.932	79.693		14.605	56.9		0	83.5767		1.18567	95.9893		24.647	110.988		1.94133	96.4426		2.80533	94.9036		7.452	97.2737		2.885	96.496
95-100		96.25	3.6434	88.591	96.1039	1.3054	121.735	96.1039	2	82.072	96.1039	1	99.014	95.7746	0.1955	101.969	95.7746	16.74	104.833	95.7143	0	112.53	95.6522	3.988	79.99	95.5882	16.119	59.4301	95.4545	0	79.537	95.4545	0	94.567	95.4545	23.486	113.522	95.3846	4.582	105.521	95.3125	5.405	98.2784	95.3125	7.993	96.228	95.2381	0.119	98.662
		97.5	4.8382	92.595	97.4026	2.1464	114.402	97.4026	2	82.495	97.4026	2.3181	99.172	97.1831	1.5775	106.892	97.1831	12.215	108.249	97.1429	0.51	113.49	97.1014	4	84.123	97.0588	14.438	56.1512	96.9697	0.821	79.91	96.9697	0	95.055	96.9697	52.819	120.215	96.9231	5	108.962	96.875	7.368	92.9561	96.875	8	90.543	96.8254	1.126	100.765
		98.75	6.0205	96.622	98.7013	3.4825	109.123	98.7013	2.3314	81.603	98.7013	4.8908	98.195	98.5915	3.6685	110.653	98.5915	8.938	109.123	98.5714	2.02	109.94	98.5507	4.707	85.304	98.5294	11.005	49.6744	98.4848	1	79.645	98.4848	0	93.844	98.4848	93.23	125.397	98.4615	4.541	109.777	98.4375	9.264	87.6171	98.4375	8.826	82.277	98.4127	1.958	102.376
		100	6.3879	100.506	100	4.6142	105.221	100	3.7998	76.606	100	7.391	100.109	100	7.1385	108.804	100	7.25	105.178	100	4.53	100.88	100	5	80.659	100	8.694	41.918	100	1.61	78.589	100	0.364	87.193	100	118.815	123.443	100	4.241	103.35	100	11.424	84.265	100	8.24	71.987	100	2.723	99.184
Average			5.2225	94.5785		2.88713	112.62		2.5328	80.694		3.89997	99.1225		1.81383	106.505		12.631	107.402		1.765	109.21		4.42375	82.519		12.564	51.7934		0.85775	79.4202		0	94.4887		56.5117	119.711		4.591	106.903		8.36525	90.7792		8.26475	85.2587		1.4815	100.247
[truncated: 63 more columns]

## Sheet: Summary
% Chromosome Length		Mean	STDDEV	SEM
5	FISH	6.92348	3.77573	0.620727
	PI	172.825	28.3072	4.65368
10	FISH	7.94035	6.79802	1.11759
	PI	137.241	23.5971	3.87935
15	FISH	8.01286	5.78218	0.950584
	PI	98.3616	18.4061	3.02594
20	FISH	7.43877	4.99689	0.821484
	PI	84.0874	14.9145	2.45193
25	FISH	7.29933	4.13803	0.680287
	PI	83.3789	14.6147	2.40265
30	FISH	6.12513	3.31565	0.545089
	PI	84.7184	14.2071	2.33564
35	FISH	6.19384	3.0296	0.498063
	PI	88.0464	15.296	2.51465
40	FISH	6.75324	4.51706	0.742601
	PI	91.0033	15.2629	2.5092
45	FISH	7.52349	8.23738	1.35422
	PI	92.2014	14.8969	2.44904
50	FISH	7.93857	10.611	1.74444
	PI	91.6344	15.3972	2.53129
55	FISH	6.66989	6.33765	1.0419
	PI	91.9414	15.0433	2.4731
60	FISH	8.44139	12.8535	2.11311
	PI	91.8107	15.5051	2.54902
65	FISH	14.6262	33.5356	5.51322
	PI	91.4216	15.9632	2.62433
70	FISH	17.121	19.4809	3.20264
	PI	87.5317	14.9324	2.45488
75	FISH	53.1855	47.6397	7.83192
	PI	79.2113	13.7211	2.25574
80	FISH	65.7468	56.6283	9.30964
	PI	71.7322	13.9105	2.28687
85	FISH	47.7512	54.5172	8.96257
	PI	77.2635	16.1538	2.65567
90	FISH	20.9328	29.8818	4.91254
	PI	91.9029	16.1666	2.65777
95	FISH	4.9647	4.83576	0.794994
	PI	98.2921	15.2517	2.50736
100	FISH	6.01224	9.30568	1.52984
	PI	97.8149	15.4088	2.53319
