# Supplementary material for: Large domains of heterochromatin direct the formation of short mitotic chromosome loops
Source: eLife. 2020 Sep 11;9:e57212. doi: 10.7554/eLife.57212 (PMC7515631; doi:10.7554/eLife.57212)
Supplement: Figure 3—source data 2. [file elife-57212-fig3-data2.xlsx]

## Sheet: All
1	FISH		PI	3	FISH		PI	5	FISH		PI	6	FISH		PI	8	FISH		PI	9	FISH		PI	10	FISH		PI	1	FISH		PI	12	FISH		PI	13	FISH		PI	14	FISH		PI	15	FISH		PI	16	FISH
X	Y	X	Y	X	Y	X	Y	X	Y	X	Y	X	Y	X	Y	X	Y	X	Y	X	Y	X	Y	X	Y	X	Y	X	Y	X	Y	X	Y	X	Y	X	Y	X	Y	X	Y	X	Y	X	Y	X	Y	X	Y
0	13	0	136	0	14	0	151	0	14	0	208	0	12	0	228	0	14	0	124	0	16	0	150	0	5	0	176	0	6	0	174	0	4	0	154	0	20	0	127	0	26	0	140	0	10	0	202	0	4
1	13.414	1	138.486	1	16.161	1	166.307	1	14.92	1	212.84	1	10.862	1	221.145	1	16.1957	1	134.996	1	16.108	1	149.11	1	3.59	1	175.253	1	5.4453	1	179.818	1	3.024	1	152.363	1	18.4311	1	128.927	1	34.9082	1	139.949	1	9.338	1	196.051	1	3.435
2	13.505	2	138.678	2	17.02	2	170.05	2	14.88	2	211.68	2	11.015	2	213.499	2	16.8223	2	123.901	2	14.685	2	148.392	2	3.351	2	178.339	2	5.7376	2	183.714	2	3	2	156.46	2	17.4463	2	129.377	2	38.5707	2	138.765	2	9.029	2	182.859	2	4.172
3	12.758	3	138.495	3	20.41	3	173.015	3	13.8	3	219.48	3	12.618	3	203.247	3	16.2567	3	112.961	3	13.005	3	146.973	3	2.082	3	181.22	3	6	3	184.333	3	5.181	3	154.972	3	15.7049	3	126.097	3	33.8681	3	141.163	3	8.812	3	172.59	3	5.403
4	11.353	4	132.754	4	24.824	4	177.031	4	12.08	4	213.76	4	14.824	4	184.088	4	15.1492	4	104.559	4	11.751	4	147.605	4	1.3451	4	177.726	4	5.6718	4	180.258	4	12.131	4	143.896	4	12.9459	4	116.335	4	25.6711	4	141.176	4	8.53	4	162.953	4	6.05
5	10.585	5	124.562	5	25.671	5	180.947	5	11	5	194	5	14.242	5	163.592	5	14.2985	5	99.5925	5	9.206	5	146.913	5	0.152	5	170.733	5	5	5	174.626	5	24.357	5	141.547	5	12.0952	5	110.439	5	17.9381	5	141.156	5	7.808	5	144.434	5	5.982
6	10.502	6	118.091	6	25.21	6	176.619	6	12.16	6	193.76	6	13.499	6	155.677	6	13.6011	6	105.336	6	6.77	6	140.001	6	0	6	164.915	6	5	6	161.093	6	40.963	6	139.39	6	15.045	6	102.505	6	11.1357	6	143.245	6	6.978	6	128.297	6	6.127
7	9.349	7	109.452	7	24.8	7	166.349	7	14.72	7	201.4	7	14.33	7	146.926	7	11.2735	7	114.761	7	4.863	7	136.801	7	1.6748	7	155.198	7	5.8244	7	159.983	7	60.58	7	136.247	7	21.1498	7	95.7995	7	8.6171	7	135.68	7	6.839	7	114.949	7	6.575
8	8.377	8	104.708	8	21.611	8	161.241	8	15.92	8	208.52	8	14.709	8	136.594	8	7.4528	8	126.69	8	3.7	8	134.458	8	5.8599	8	144.728	8	5.3436	8	146.476	8	81.89	8	115.288	8	35.5143	8	94.403	8	8.3558	8	139.695	8	7.72	8	107.059	8	9.884
9	6.315	9	103.991	9	14.563	9	161.052	9	16.84	9	211.48	9	13.872	9	126.853	9	5.1651	9	138.719	9	2.985	9	132.904	9	15.3806	9	132.929	9	5	9	138.043	9	122.049	9	101.204	9	57.9497	9	93.7049	9	8.092	9	131.375	9	7.77	9	98.426	9	18.536
10	5.798	10	103.22	10	9.147	10	157.966	10	19	10	217	10	12.136	10	129.794	10	5.1034	10	138.555	10	5.071	10	129.129	10	32.7764	10	124.153	10	5	10	135.026	10	124.154	10	93.9675	10	76.661	10	85.8017	10	6.6363	10	120.612	10	7.342	10	90.674	10	30.028
11	10.618	11	102.373	11	14.013	11	162.815	11	47.6	11	214.16	11	10.951	11	138.992	11	7.9118	11	131.553	11	13.698	11	123.43	11	56.0537	11	118.353	11	5	11	130.861	11	92.496	11	92.2849	11	87.1447	11	76.811	11	3.947	11	111.578	11	6.772	11	88.673	11	43.301
12	27.12	12	102.077	12	26.916	12	167.486	12	117.4	12	206.12	12	10.564	12	143.996	12	9.9126	12	124.137	12	35.868	12	113.778	12	74.0526	12	116.201	12	5	12	125.744	12	60.962	12	93.0353	12	93.4231	12	76.5701	12	1.3306	12	98.8523	12	5.555	12	89.831	12	49.764
13	63.67	13	93.1132	13	53.773	13	165.12	13	203.12	13	189.36	13	9.785	13	139.683	13	8.6602	13	112.429	13	77.113	13	104.232	13	70.1781	13	111.065	13	5.0387	13	116.224	13	28.703	13	96.6555	13	95	13	79.4564	13	0.5521	13	87.5499	13	6.723	13	87.846	13	42.936
14	105.558	14	82.891	14	74.432	14	165.863	14	245.12	14	170.88	14	8.344	14	133.579	14	6.6142	14	106.274	14	135.129	14	96.9809	14	46.0261	14	103.741	14	5	14	114.24	14	14.717	14	109.719	14	83.3372	14	78.9014	14	0.9849	14	80.0089	14	9.788	14	84.361	14	34.636
15	130.933	15	72.7784	15	60.062	15	161.551	15	212	15	157	15	5.386	15	139.888	15	2.9477	15	102.998	15	189.672	15	90.4247	15	21.7894	15	105.926	15	5.1727	15	106.005	15	6.535	15	128.243	15	64.3886	15	80.4729	15	0.935	15	75.0828	15	12.355	15	81.144	15	37.108
16	123.688	16	65.0755	16	38.427	16	157.856	16	104.777	16	129.302	16	2.969	16	142.651	16	1.1622	16	98.0448	16	211.804	16	82.3289	16	10.3206	16	116.381	16	5.5379	16	99.275	16	4.009	16	136.218	16	52.3672	16	76.0686	16	0.0321	16	68.8639	16	14.921	16	80.147	16	49.464
17	93.575	17	59.6606	17	23.451	17	153.882	17	34.395	17	108.946	17	2.503	17	142.807	17	1.8157	17	93.4406	17	191.622	17	73.902	17	7.4458	17	134.765	17	9.3605	17	91.546	17	4.043	17	139.57	17	47.0915	17	68.6623	17	0.0351	17	63.0528	17	18.984	17	77.93	17	82.42
18	59.156	18	54.9344	18	19.745	18	146.881	18	7.963	18	99.831	18	3.076	18	129.576	18	3.324	18	84.7034	18	131.385	18	70.2374	18	5.7144	18	150.142	18	19.6526	18	86.262	18	3.764	18	137.525	18	47.1133	18	72.255	18	0	18	60.7899	18	31.339	18	73.317	18	120.051
19	30.953	19	51.1436	19	37.538	19	139.801	19	15.951	19	101.775	19	4.192	19	113.089	19	5.9092	19	79.1243	19	65.401	19	70.6901	19	4.3647	19	165.41	19	34.9894	19	81.122	19	3.443	19	131.637	19	54.967	19	81.6816	19	0.0426	19	56.4394	19	70.88	19	67.572	19	137.2
20	13.638	20	48.4533	20	84.741	20	129.762	20	61.693	20	105.543	20	13.98	20	98.619	20	10.216	20	74.5088	20	26.378	20	76.555	20	5.2316	20	180.185	20	44.0582	20	79.766	20	3.157	20	128.806	20	63.2892	20	83.2583	20	0	20	55.5435	20	137.544	20	67.93	20	129.473
21	9.601	21	50.6132	21	159.249	21	116.545	21	139.043	21	112.654	21	38.217	21	88.947	21	18.9003	21	71.3041	21	9.933	21	90.2035	21	7.731	21	187.979	21	39.1803	21	76.439	21	5.125	21	124.594	21	63.2602	21	80.636	21	0.4781	21	56.9546	21	173.938	21	66.826	21	103.694
22	9.688	22	57.1752	22	182.257	22	111.502	22	220.55	22	111.43	22	93.343	22	84.868	22	30.146	22	69.4695	22	5.491	22	105.27	22	8.3515	22	184.912	22	25.6872	22	78.309	22	11.053	22	115.121	22	56.5216	22	76.1083	22	4.4052	22	57.1568	22	177.565	22	68.841	22	68.327
23	9.849	23	63.1466	23	158.625	23	114.12	23	220.114	23	105.951	23	170.018	23	82.219	23	32.795	23	75.3285	23	5.756	23	121.454	23	8.1323	23	182.795	23	12.6321	23	88.158	23	20.287	23	109.863	23	45.5388	23	75.1919	23	18.3914	23	57.5961	23	131.22	23	71.123	23	34.588
24	8.66	24	71.508	24	97.324	24	120.286	24	180.514	24	104.473	24	238.887	24	83.089	24	30.5213	24	88.5975	24	6.607	24	138.4	24	8.2917	24	174.943	24	6.9963	24	98.355	24	29.408	24	105.357	24	33.3941	24	79.2875	24	44.3693	24	59.1979	24	80.779	24	73.955	24	14.974
25	9.201	25	82.7338	25	41.833	25	131.054	25	141.192	25	101.142	25	221.357	25	92.156	25	24.4037	25	106.478	25	6.415	25	142.673	25	8.7513	25	167.113	25	6	25	111.941	25	32.706	25	98.1621	25	20.736	25	82.6242	25	77.2326	25	60.5625	25	39.018	25	73.17	25	4.839
26	9.555	26	96.1822	26	13.605	26	142.297	26	108.305	26	96.32	26	171.835	26	103.428	26	17.3136	26	120.591	26	5.882	26	138.138	26	8.4826	26	164.139	26	6.3081	26	124.782	26	27.377	26	94.0651	26	13.7182	26	85.1494	26	99.0703	26	64.7051	26	20.352	26	74.547	26	0.797
27	10.733	27	103.946	27	4.931	27	148.708	27	84.436	27	95.783	27	100.295	27	104.969	27	13.9171	27	133.9	27	6.463	27	136.332	27	8.9957	27	171.494	27	6.6568	27	135.419	27	20.645	27	97.9015	27	9.7817	27	85.5097	27	91.6411	27	63.2161	27	12.252	27	79.76	27	0.034
28	10.825	28	114.593	28	5.682	28	146.851	28	68.773	28	101.733	28	51.271	28	104.576	28	13.9374	28	141.343	28	7.97	28	133.271	28	8.9977	28	179.182	28	5.8346	28	146.219	28	15.194	28	108.559	28	5.9202	28	83.4521	28	76.9697	28	64.2117	28	5.763	28	89.852	28	0.25
29	11.136	29	117.12	29	7.005	29	136.517	29	55.537	29	111.518	29	25.547	29	115.972	29	13.6561	29	144.223	29	9.873	29	127.376	29	8.6375	29	179.677	29	5.0124	29	148.558	29	13.145	29	119.938	29	5.4516	29	87.5925	29	65.9421	29	67.9098	29	2.43	29	101.94	29	0.405
30	11.587	30	113.748	30	8.623	30	126.658	30	38.29	30	123.367	30	15.531	30	137.279	30	13.6481	30	141.191	30	10.822	30	121.062	30	9.8402	30	164.115	30	5	30	152.258	30	14.103	30	134.149	30	5.5929	30	88.1655	30	60.2907	30	70.5576	30	2.352	30	109.819	30	0.996
31	10.789	31	106.701	31	9.424	31	114.488	31	22.509	31	135.79	31	11.823	31	138.387	31	14.7329	31	136.271	31	10.327	31	117.495	31	12.6482	31	155.299	31	7.3334	31	148.758	31	16.644	31	146.542	31	6.8589	31	88.161	31	56.2184	31	68.963	31	4.444	31	113.273	31	1.872
32	10.015	32	95.4807	32	8.548	32	102.679	32	13.762	32	151.555	32	10.729	32	135.629	32	15.6125	32	126.34	32	10.002	32	116.601	32	13.6173	32	147.242	32	10.372	32	143.907	32	17.458	32	148.315	32	9.6042	32	88.5898	32	46.5665	32	70.8664	32	9.333	32	110.879	32	2.577
33	10	33	85.3817	33	9.072	33	97.808	33	10.57	33	169.331	33	11.068	33	133.49	33	16.0583	33	115.382	33	11.138	33	114.2	33	13.9069	33	132.89	33	13.397	33	139.68	33	17.792	33	149.7	33	11.7942	33	92.1786	33	37.4766	33	80.3029	33	14.154	33	107.332	33	3.111
34	10.962	34	78.9049	34	10.099	34	105.627	34	10.306	34	186.418	34	11.566	34	136.623	34	16.6461	34	118.486	34	12.658	34	110.79	34	12.293	34	121.261	34	14.5442	34	133.724	34	16.977	34	152.972	34	14.367	34	96.3393	34	31.2125	34	90.2338	34	18.668	34	104.489	34	3.944
35	12.074	35	76.9263	35	11.403	35	116.107	35	10.9	35	192.656	35	13.39	35	134.878	35	17.1586	35	128.747	35	13.178	35	107.566	35	10.5958	35	117.846	35	17.2434	35	136.317	35	14.495	35	159.32	35	16.2661	35	101.502	35	20.9502	35	95.9794	35	17.919	35	95.594	35	5.379
36	13.542	36	77.3522	36	14.518	36	126.874	36	11	36	182.2	36	14.998	36	125.521	36	17.5562	36	138.895	36	13.203	36	105.881	36	10.6714	36	121.243	36	17.4308	36	136.661	36	13	36	154.253	36	16.2557	36	103.194	36	13.2695	36	93.3406	36	14.087	36	87.873	36	7.084
37	13.687	37	80.5296	37	16.109	37	142.929	37	11	37	172.2	37	15.284	37	122.328	37	18.5403	37	141.187	37	14.225	37	108.508	37	10.0739	37	122.537	37	14.6538	37	135.103	37	12.788	37	143.56	37	14.8676	37	100.617	37	10.0207	37	92.2319	37	10.863	37	86.214	37	10.108
38	12.925	38	87.2079	38	15.667	38	158.682	38	11.4	38	168.8	38	15.092	38	113.005	38	24.3174	38	142.523	38	15	38	112.744	38	10.1729	38	122.972	38	11.833	38	137.073	38	11.44	38	138.846	38	13.3063	38	96.836	38	11.4418	38	90.8385	38	8.78	38	85.856	38	14.811
39	12.763	39	93.0392	39	15.398	39	166.714	39	12	39	172	39	14.616	39	109.122	39	29.5007	39	141.88	39	14.775	39	117.292	39	9.5372	39	125.644	39	9.7102	39	136.569	39	12.745	39	128.443	39	13.6374	39	90.9524	39	14.874	39	87.4841	39	7.972	39	85.26	39	16.156
40	14.635	40	99.3547	40	16.81	40	161.864	40	12	40	175.8	40	14.754	40	116.662	40	35.6135	40	138.634	40	15.492	40	123.071	40	10.8061	40	130.535	40	8.2094	40	141.466					40	16.1258	40	88.1382	40	15.431	40	82.0109	40	7.845	40	90.717	40	14.48
41	13.63	41	101.419	41	15.926	41	162.743	41	12.4	41	178.2	41	15.326	41	129.25	41	35.1546	41	123.828	41	16.357	41	124.906	41	11.615	41	137.34	41	6.4132	41	148.595					41	17.7486	41	82.7249	41	13.1084	41	79.2541	41	7.063	41	93.014	41	11.344
42	13.239	42	101.406	42	14.576	42	160.714	42	13.8	42	176.4	42	16.167	42	139.739	42	30.9625	42	115.71	42	16.31	42	120.882	42	11.0266	42	141.453	42	5.938	42	158.336					42	19.048	42	80.6485	42	8.633	42	75.4525	42	7	42	92.703	42	8.096
43	12.938	43	101.591	43	13.492	43	158.808	43	15.4	43	166.6	43	16.835	43	139.876	43	27.1828	43	104.899	43	16.028	43	117.06	43	11.6138	43	146.879	43	5.338	43	154.117					43	20.8683	43	83.4895	43	6	43	70.2449	43	8.071	43	94.835	43	5.603
44	12.726	44	100.23	44	12	44	156.682	44	15.6	44	158	44	15.317	44	135.624	44	23.0435	44	102.86	44	16.346	44	119.829	44	11.8834	44	152.93	44	5.0042	44	154.576					44	20.0647	44	85.6457	44	6	44	66.9816	44	9.612	44	99.589	44	4.365
45	12.122	45	96.3202	45	12	45	144.795	45	15.4	45	155	45	15.038	45	128.461	45	21.6059	45	115.786	45	16.59	45	124.154	45	11.9011	45	159.441	45	5.7034	45	158.875					45	18.3098	45	88.6731	45	7.5279	45	67.5215	45	11.095	45	109.377	45	4.376
46	13.083	46	91.6948	46	13.498	46	138.757	46	15.6	46	155.4	46	16.672	46	130.915	46	20.1396	46	125.373	46	15.633	46	124.404	46	10.9228	46	161.099	46	6	46	156.957					46	18.2735	46	93.3126	46	10.1958	46	64.5892	46	13.03	46	116.08	46	5.761
47	13.492	47	87.6192	47	14.985	47	137.475	47	15	47	161.2	47	17.339	47	140.95	47	20.1505	47	129.024	47	15.453	47	126.993	47	11.812	47	156.777	47	6.0362	47	156.157					47	18.714	47	93.4368	47	11.4719	47	64.2004	47	13.584	47	118.689	47	9.643
48	13.257	48	83.8384	48	15.833	48	133.983	48	15.4	48	175.8	48	17.78	48	135.936	48	19.4036	48	139.642	48	15.524	48	132.059	48	13.7493	48	150.734	48	6	48	162.142					48	19.3472	48	91.1138	48	11.4745	48	63.7156	48	13.44	48	115.507	48	22.963
49	13.108	49	82.502	49	14.961	49	133.891	49	15.6	49	188.8	49	17.89	49	128.322	49	18.4773	49	148.279	49	17.002	49	134.936	49	13.0251	49	139.403	49	6.0118	49	164.077					49	20.4923	49	93.0757	49	10.7497	49	67.1567	49	12.579	49	113.987	49	52.386
50	13.012	50	86.1092	50	14.935	50	138.632	50	15.4	50	194.6	50	16.328	50	125.355	50	21.0572	50	152.123	50	20.923	50	135.973	50	12.4514	50	136.665	50	6.1126	50	169.374					50	22.136	50	95.6065	50	9.9398	50	67.7201	50	12.361	50	113.278	50	91.351
51	12.626	51	90.2813	51	16	51	143.432	51	16	51	196.2	51	15.21	51	114.974	51	26.3683	51	154.886	51	24.998	51	139.248	51	11.6194	51	139.239	51	6.8703	51	166.468					51	22.9692	51	97.1272	51	9.9963	51	63.0354	51	12.402	51	113.215	51	109.698
52	11.661	52	93.5259	52	15.791	52	145.91	52	17.2	52	191.8	52	15.254	52	110.971	52	33.3308	52	153.542	52	27.139	52	146.181	52	11.9283	52	139.857	52	7.1783	52	156.847					52	23.5918	52	95.973	52	9.135	52	61.745	52	11.617	52	114.339	52	80.704
53	11.607	53	99.5776	53	13.92	53	142.841	53	19.8	53	183.4	53	15.142	53	112.47	53	38.8724	53	149.743	53	27.869	53	147.784	53	10.8814	53	141.34	53	7.1858	53	146.839					53	25.3913	53	91.4695	53	7.5269	53	69.3314	53	11.103	53	109.332	53	40.28
54	13.262	54	103.223	54	13.12	54	133.471	54	20.6	54	181.6	54	16.495	54	115.635	54	40.8605	54	142.791	54	27.374	54	148.233	54	9.623	54	139.695	54	6.9291	54	150.128					54	26.3697	54	84.9853	54	7	54	75.9949	54	9.764	54	103.511	54	16.627
55	13.454	55	103.815	55	15.362	55	116.101	55	18.8	55	188.6	55	16.898	55	127.302	55	38.7159	55	129.913	55	27.404	55	148.537	55	9.1823	55	138.418	55	6.4213	55	143.301					55	26.0305	55	77.5042	55	7	55	80.034	55	9.259	55	99.199	55	7.861
56	12.309	56	93.8242	56	15.986	56	99.598	56	16.2	56	187.8	56	16.173	56	135.041	56	33.1918	56	114.046	56	25.352	56	145.829	56	11.8344	56	134.088	56	6.4983	56	137.264					56	26.0579	56	74.9689	56	7.7989	56	79.1968	56	8.814	56	97.658	56	6.51
57	11.944	57	82.0226	57	14.252	57	92.76	57	13.8	57	175	57	15.316	57	132.188	57	26.5384	57	110.053	57	23.119	57	141.308	57	14.9932	57	128.513	57	6	57	135.585					57	25.0078	57	75.5331	57	9.1607	57	74.996	57	8.248	57	92.751	57	6.932
58	11.932	58	74.5786	58	11.124	58	82.445	58	13.274	58	161.537	58	14.609	58	128.7	58	22.1084	58	107.682	58	22.664	58	133.014					58	6	58	138.114					58	22.7448	58	75.2605	58	10	58	69.5077	58	8.257	58	89.339	58	7
59	12.7	59	71.5886	59	11.73	59	75.168	59	14.989	59	156.003	59	15.96	59	124.04	59	21.644	59	111.503	59	23.799	59	123.634					59	6	59	138.579					59	23.6758	59	74.4724	59	10	59	63.0703	59	8.582	59	87.557
60	13.445	60	67.5495	60	14.702	60	77.658	60	15.897	60	149.155	60	18.218	60	133.853	60	21.9058	60	121.529									60	6.2459	60	135.643									60	7.9162	60	62.0148	60	8	60	87.361
61	12.879	61	63.0332	61	16.062	61	93.197	61	16.71	61	141.875	61	18.032	61	132.364	61	20.8626	61	126.624									61	6.1313	61	128.919									61	6.3919	61	65.1196	61	7.984	61	84.929
62	12.62	62	58.0938	62	16.781	62	111.139	62	15.906	62	130.545	62	17.185	62	123.441	62	18.0687	62	134.549									62	6.2607	62	118.253									62	6	62	70.5981	62	8	62	88.62
63	13	63	53.4409	63	17.203	63	126.255	63	15.331	63	119.907	63	16.579	63	112.486	63	18.1178	63	138.565									63	6	63	111.754									63	6.3978	63	76.8281	63	8.796	63	95.918
64	12.573	64	51.1722	64	15.711	64	130.742	64	14.816	64	115.185	64	16.597	64	104.262	64	18.4183	64	139.774									64	6.0184	64	105.108									64	7.1655	64	78.3068	64	9.19	64	99.121
65	11.038	65	49.9295	65	15.171	65	129.431	65	14.149	65	113.183					65	18.966	65	145.103									65	6.6733	65	99.575									65	7.9701	65	79.4489	65	9.793	65	100.612
66	10.49	66	46.9814	66	17.167	66	125.219	66	15.302	66	109.221					66	19.2334	66	143.101									66	7.0272	66	97.782									66	9.9652	66	79.626	66	10.798	66	100.124
67	11.68	67	44.0938	67	16.961	67	125.944	67	16.037	67	101.387					67	19.1463	67	129.291									67	7.6616	67	102.901									67	13.0074	67	79.855	67	12.558	67	97.385
68	13.361	68	42.3215	68	15.506	68	130.532	68	16.632	68	92.392					68	18.2932	68	111.916									68	7.8449	68	108.23									68	16.2471	68	81.1873	68	14.124	68	98.992
69	13.296	69	40.9957	69	15.116	69	138.97																					69	8	69	107.708									69	16.3408	69	81.9006	69	15.282	69	100.404
				70	15	70	145.835																					70	8	70	107.743													70	15.534	70	97.093
				71	15.634	71	142.64																																					71	14.879	71	89.608
				72	15.581	72	135.884
				73	15.257	73	129.423
				74	15.679	74	120.227
[truncated: 78 more columns]

## Sheet: Binned
	1	FISH	PI	3	FISH	PI	5	FISH	PI	6	FISH	PI	8	FISH	PI	9	FISH	PI	10	FISH	PI	1	FISH	PI	12	FISH	PI	13	FISH	PI	14	FISH	PI	15	FISH	PI	16	FISH	PI	17	FISH	PI	18A	FISH	PI	18B	FISH	PI	19
X	X	Y	Y	X	Y	Y	X	Y	Y	X	Y	Y	X	Y	Y	X	Y	Y	X	Y	Y	X	Y	Y	X	Y	Y	X	Y	Y	X	Y	Y	X	Y	Y	X	Y	Y	X	Y	Y	X	Y	Y	X	Y	Y	X
0	0	13	136	0	14	151	0	14	208	0	12	228	0	14	124	0	16	150	0	5	176	0	6	174	0	4	154	0	20	127	0	26	140	0	10	202	0	4	142	0	6	174	0	4	144	0	6	172	0
1	1.44928	13.414	138.486	1.35135	16.161	166.307	1.47059	14.92	212.84	1.5625	10.862	221.145	1.47059	16.1957	134.996	1.69492	16.108	149.11	1.75439	3.59	175.253	1.42857	5.4453	179.818	2.5641	3.024	152.363	1.69492	18.4311	128.927	1.44928	34.9082	139.949	1.40845	9.338	196.051	1.72414	3.435	146.688	1.2987	5.119	177.848	1.96078	3.233	143.77	1.92308	4.383	191.821	1.2987
2	2.89855	13.505	138.678	2.7027	17.02	170.05	2.94118	14.88	211.68	3.125	11.015	213.499	2.94118	16.8223	123.901	3.38983	14.685	148.392	3.50877	3.351	178.339	2.85714	5.7376	183.714	5.12821	3	156.46	3.38983	17.4463	129.377	2.89855	38.5707	138.765	2.8169	9.029	182.859	3.44828	4.172	150.042	2.5974	4.237	184.171	3.92157	2.067	141.805	3.84615	4.314	208.725	2.5974
3	4.34783	12.758	138.495	4.05405	20.41	173.015	4.41176	13.8	219.48	4.6875	12.618	203.247	4.41176	16.2567	112.961	5.08475	13.005	146.973	5.26316	2.082	181.22	4.28571	6	184.333	7.69231	5.181	154.972	5.08475	15.7049	126.097	4.34783	33.8681	141.163	4.22535	8.812	172.59	5.17241	5.403	146.032	3.8961	3.624	181.861	5.88235	1.07	143.032	5.76923	4.232	217.991	3.8961
4	5.7971	11.353	132.754	5.40541	24.824	177.031	5.88235	12.08	213.76	6.25	14.824	184.088	5.88235	15.1492	104.559	6.77966	11.751	147.605	7.01754	1.3451	177.726	5.71429	5.6718	180.258	10.2564	12.131	143.896	6.77966	12.9459	116.335	5.7971	25.6711	141.176	5.6338	8.53	162.953	6.89655	6.05	136.946	5.19481	3.421	179.551	7.84314	0.093	136.316	7.69231	4.405	220.353	5.19481
5	7.24638	10.585	124.562	6.75676	25.671	180.947	7.35294	11	194	7.8125	14.242	163.592	7.35294	14.2985	99.5925	8.47458	9.206	146.913	8.77193	0.152	170.733	7.14286	5	174.626	12.8205	24.357	141.547	8.47458	12.0952	110.439	7.24638	17.9381	141.156	7.04225	7.808	144.434	8.62069	5.982	128.175	6.49351	2.593	168.85	9.80392	0	136.536	9.61538	5.577	208.165	6.49351
6	8.69565	10.502	118.091	8.10811	25.21	176.619	8.82353	12.16	193.76	9.375	13.499	155.677	8.82353	13.6011	105.336	10.1695	6.77	140.001	10.5263	0	164.915	8.57143	5	161.093	15.3846	40.963	139.39	10.1695	15.045	102.505	8.69565	11.1357	143.245	8.4507	6.978	128.297	10.3448	6.127	115.119	7.79221	1.711	153.819	11.7647	0	131.014	11.5385	9.317	190.669	7.79221
7	10.1449	9.349	109.452	9.45946	24.8	166.349	10.2941	14.72	201.4	10.9375	14.33	146.926	10.2941	11.2735	114.761	11.8644	4.863	136.801	12.2807	1.6748	155.198	10	5.8244	159.983	17.9487	60.58	136.247	11.8644	21.1498	95.7995	10.1449	8.6171	135.68	9.85915	6.839	114.949	12.069	6.575	102.265	9.09091	0.83	137.6	13.7255	0	121.959	13.4615	17.652	179.992	9.09091
8	11.5942	8.377	104.708	10.8108	21.611	161.241	11.7647	15.92	208.52	12.5	14.709	136.594	11.7647	7.4528	126.69	13.5593	3.7	134.458	14.0351	5.8599	144.728	11.4286	5.3436	146.476	20.5128	81.89	115.288	13.5593	35.5143	94.403	11.5942	8.3558	139.695	11.2676	7.72	107.059	13.7931	9.884	93.6625	10.3896	0	123.584	15.6863	0	116.261	15.3846	36.852	174.196	10.3896
9	13.0435	6.315	103.991	12.1622	14.563	161.052	13.2353	16.84	211.48	14.0625	13.872	126.853	13.2353	5.1651	138.719	15.2542	2.985	132.904	15.7895	15.3806	132.929	12.8571	5	138.043	23.0769	122.049	101.204	15.2542	57.9497	93.7049	13.0435	8.092	131.375	12.6761	7.77	98.426	15.5172	18.536	86.0431	11.6883	0	115.867	17.6471	0	110.391	17.3077	62.78	171.004	11.6883
10	14.4928	5.798	103.22	13.5135	9.147	157.966	14.7059	19	217	15.625	12.136	129.794	14.7059	5.1034	138.555	16.9492	5.071	129.129	17.5439	32.7764	124.153	14.2857	5	135.026	25.641	124.154	93.9675	16.9492	76.661	85.8017	14.4928	6.6363	120.612	14.0845	7.342	90.674	17.2414	30.028	74.8194	12.987	0	98.782	19.6078	3.328	103.272	19.2308	87.883	159.56	12.987
11	15.942	10.618	102.373	14.8649	14.013	162.815	16.1765	47.6	214.16	17.1875	10.951	138.992	16.1765	7.9118	131.553	18.6441	13.698	123.43	19.2982	56.0537	118.353	15.7143	5	130.861	28.2051	92.496	92.2849	18.6441	87.1447	76.811	15.942	3.947	111.578	15.493	6.772	88.673	18.9655	43.301	66.7002	14.2857	0	89.248	21.5686	15.67	96.4862	21.1538	97.601	150.727	14.2857
12	17.3913	27.12	102.077	16.2162	26.916	167.486	17.6471	117.4	206.12	18.75	10.564	143.996	17.6471	9.9126	124.137	20.339	35.868	113.778	21.0526	74.0526	116.201	17.1429	5	125.744	30.7692	60.962	93.0353	20.339	93.4231	76.5701	17.3913	1.3306	98.8523	16.9014	5.555	89.831	20.6897	49.764	60.1745	15.5844	0.193	86.474	23.5294	47.698	94.8816	23.0769	94.557	147.861	15.5844
13	18.8406	63.67	93.1132	17.5676	53.773	165.12	19.1176	203.12	189.36	20.3125	9.785	139.683	19.1176	8.6602	112.429	22.0339	77.113	104.232	22.807	70.1781	111.065	18.5714	5.0387	116.224	33.3333	28.703	96.6555	22.0339	95	79.4564	18.8406	0.5521	87.5499	18.3099	6.723	87.846	22.4138	42.936	56.6283	16.8831	0.395	84.379	25.4902	106.927	96.7619	25	88.659	146.418	16.8831
14	20.2899	105.558	82.891	18.9189	74.432	165.863	20.5882	245.12	170.88	21.875	8.344	133.579	20.5882	6.6142	106.274	23.7288	135.129	96.9809	24.5614	46.0261	103.741	20	5	114.24	35.8974	14.717	109.719	23.7288	83.3372	78.9014	20.2899	0.9849	80.0089	19.7183	9.788	84.361	24.1379	34.636	53.1238	18.1818	0.654	84.195	27.451	170.744	93.2891	26.9231	87.476	138.173	18.1818
15	21.7391	130.933	72.7784	20.2703	60.062	161.551	22.0588	212	157	23.4375	5.386	139.888	22.0588	2.9477	102.998	25.4237	189.672	90.4247	26.3158	21.7894	105.926	21.4286	5.1727	106.005	38.4615	6.535	128.243	25.4237	64.3886	80.4729	21.7391	0.935	75.0828	21.1268	12.355	81.144	25.8621	37.108	52.8359	19.4805	0.426	82.593	29.4118	207.102	94.6577	28.8462	105.589	130.693	19.4805
16	23.1884	123.688	65.0755	21.6216	38.427	157.856	23.5294	104.777	129.302	25	2.969	142.651	23.5294	1.1622	98.0448	27.1186	211.804	82.3289	28.0702	10.3206	116.381	22.8571	5.5379	99.275	41.0256	4.009	136.218	27.1186	52.3672	76.0686	23.1884	0.0321	68.8639	22.5352	14.921	80.147	27.5862	49.464	56.3353	20.7792	1.905	80.575	31.3725	206.89	96.235	30.7692	135.988	126.198	20.7792
17	24.6377	93.575	59.6606	22.973	23.451	153.882	25	34.395	108.946	26.5625	2.503	142.807	25	1.8157	93.4406	28.8136	191.622	73.902	29.8246	7.4458	134.765	24.2857	9.3605	91.546	43.5897	4.043	139.57	28.8136	47.0915	68.6623	24.6377	0.0351	63.0528	23.9437	18.984	77.93	29.3103	82.42	59.0506	22.0779	4.913	80.014	33.3333	177.387	95.1668	32.6923	160.327	125.538	22.0779
18	26.087	59.156	54.9344	24.3243	19.745	146.881	26.4706	7.963	99.831	28.125	3.076	129.576	26.4706	3.324	84.7034	30.5085	131.385	70.2374	31.5789	5.7144	150.142	25.7143	19.6526	86.262	46.1538	3.764	137.525	30.5085	47.1133	72.255	26.087	0	60.7899	25.3521	31.339	73.317	31.0345	120.051	66.6693	23.3766	16.2	79.2	35.2941	150.92	94.4167	34.6154	158.608	124.843	23.3766
19	27.5362	30.953	51.1436	25.6757	37.538	139.801	27.9412	15.951	101.775	29.6875	4.192	113.089	27.9412	5.9092	79.1243	32.2034	65.401	70.6901	33.3333	4.3647	165.41	27.1429	34.9894	81.122	48.7179	3.443	131.637	32.2034	54.967	81.6816	27.5362	0.0426	56.4394	26.7606	70.88	67.572	32.7586	137.2	71.2303	24.6753	38.947	74.357	37.2549	145.069	95.4605	36.5385	125.672	123.519	24.6753
20	28.9855	13.638	48.4533	27.027	84.741	129.762	29.4118	61.693	105.543	31.25	13.98	98.619	29.4118	10.216	74.5088	33.8983	26.378	76.555	35.0877	5.2316	180.185	28.5714	44.0582	79.766	51.2821	3.157	128.806	33.8983	63.2892	83.2583	28.9855	0	55.5435	28.169	137.544	67.93	34.4828	129.473	76.6641	25.974	66.522	65.967	39.2157	142.259	102.205	38.4615	75.58	126.189	25.974
21	30.4348	9.601	50.6132	28.3784	159.249	116.545	30.8824	139.043	112.654	32.8125	38.217	88.947	30.8824	18.9003	71.3041	35.5932	9.933	90.2035	36.8421	7.731	187.979	30	39.1803	76.439	53.8462	5.125	124.594	35.5932	63.2602	80.636	30.4348	0.4781	56.9546	29.5775	173.938	66.826	36.2069	103.694	82.8321	27.2727	92.442	60.539	41.1765	127.107	110.381	40.3846	37.263	131.865	27.2727
22	31.8841	9.688	57.1752	29.7297	182.257	111.502	32.3529	220.55	111.43	34.375	93.343	84.868	32.3529	30.146	69.4695	37.2881	5.491	105.27	38.5965	8.3515	184.912	31.4286	25.6872	78.309	56.4103	11.053	115.121	37.2881	56.5216	76.1083	31.8841	4.4052	57.1568	30.9859	177.565	68.841	37.931	68.327	84.1353	28.5714	106.69	57.659	43.1373	88.32	117.412	42.3077	22.892	140.783	28.5714
23	33.3333	9.849	63.1466	31.0811	158.625	114.12	33.8235	220.114	105.951	35.9375	170.018	82.219	33.8235	32.795	75.3285	38.9831	5.756	121.454	40.3509	8.1323	182.795	32.8571	12.6321	88.158	58.9744	20.287	109.863	38.9831	45.5388	75.1919	33.3333	18.3914	57.5961	32.3944	131.22	71.123	39.6552	34.588	82.0758	29.8701	99.56	54.518	45.098	38.211	124.674	44.2308	17.573	147.594	29.8701
24	34.7826	8.66	71.508	32.4324	97.324	120.286	35.2941	180.514	104.473	37.5	238.887	83.089	35.2941	30.5213	88.5975	40.678	6.607	138.4	42.1053	8.2917	174.943	34.2857	6.9963	98.355	61.5385	29.408	105.357	40.678	33.3941	79.2875	34.7826	44.3693	59.1979	33.8028	80.779	73.955	41.3793	14.974	75.3925	31.1688	71.268	54.03	47.0588	9.444	130.399	46.1538	14.669	159.312	31.1688
25	36.2319	9.201	82.7338	33.7838	41.833	131.054	36.7647	141.192	101.142	39.0625	221.357	92.156	36.7647	24.4037	106.478	42.3729	6.415	142.673	43.8596	8.7513	167.113	35.7143	6	111.941	64.1026	32.706	98.1621	42.3729	20.736	82.6242	36.2319	77.2326	60.5625	35.2113	39.018	73.17	43.1034	4.839	75.7605	32.4675	36.441	56.051	49.0196	1.385	132.401	48.0769	13.227	163.007	32.4675
26	37.6812	9.555	96.1822	35.1351	13.605	142.297	38.2353	108.305	96.32	40.625	171.835	103.428	38.2353	17.3136	120.591	44.0678	5.882	138.138	45.614	8.4826	164.139	37.1429	6.3081	124.782	66.6667	27.377	94.0651	44.0678	13.7182	85.1494	37.6812	99.0703	64.7051	36.6197	20.352	74.547	44.8276	0.797	82.5933	33.7662	12.864	57.196	50.9804	0	129.701	50	11.719	154.54	33.7662
27	39.1304	10.733	103.946	36.4865	4.931	148.708	39.7059	84.436	95.783	42.1875	100.295	104.969	39.7059	13.9171	133.9	45.7627	6.463	136.332	47.3684	8.9957	171.494	38.5714	6.6568	135.419	69.2308	20.645	97.9015	45.7627	9.7817	85.5097	39.1304	91.6411	63.2161	38.0282	12.252	79.76	46.5517	0.034	89.3867	35.0649	3.65	60.35	52.9412	0	125.236	51.9231	8.276	147.287	35.0649
28	40.5797	10.825	114.593	37.8378	5.682	146.851	41.1765	68.773	101.733	43.75	51.271	104.576	41.1765	13.9374	141.343	47.4576	7.97	133.271	49.1228	8.9977	179.182	40	5.8346	146.219	71.7949	15.194	108.559	47.4576	5.9202	83.4521	40.5797	76.9697	64.2117	39.4366	5.763	89.852	48.2759	0.25	97.5081	36.3636	1.399	63.337	54.902	0	128.298	53.8462	7.598	142.382	36.3636
29	42.029	11.136	117.12	39.1892	7.005	136.517	42.6471	55.537	111.518	45.3125	25.547	115.972	42.6471	13.6561	144.223	49.1525	9.873	127.376	50.8772	8.6375	179.677	41.4286	5.0124	148.558	74.359	13.145	119.938	49.1525	5.4516	87.5925	42.029	65.9421	67.9098	40.8451	2.43	101.94	50	0.405	107.075	37.6623	5.291	68.635	56.8627	0	141.728	55.7692	7.878	140.387	37.6623
30	43.4783	11.587	113.748	40.5405	8.623	126.658	44.1176	38.29	123.367	46.875	15.531	137.279	44.1176	13.6481	141.191	50.8475	10.822	121.062	52.6316	9.8402	164.115	42.8571	5	152.258	76.9231	14.103	134.149	50.8475	5.5929	88.1655	43.4783	60.2907	70.5576	42.2535	2.352	109.819	51.7241	0.996	117.914	38.961	16.351	72.815	58.8235	0	150.275	57.6923	7.59	143.958	38.961
31	44.9275	10.789	106.701	41.8919	9.424	114.488	45.5882	22.509	135.79	48.4375	11.823	138.387	45.5882	14.7329	136.271	52.5424	10.327	117.495	54.386	12.6482	155.299	44.2857	7.3334	148.758	79.4872	16.644	146.542	52.5424	6.8589	88.161	44.9275	56.2184	68.963	43.662	4.444	113.273	53.4483	1.872	121.571	40.2597	30.279	73.786	60.7843	0.552	148.425	59.6154	7.949	148.089	40.2597
32	46.3768	10.015	95.4807	43.2432	8.548	102.679	47.0588	13.762	151.555	50	10.729	135.629	47.0588	15.6125	126.34	54.2373	10.002	116.601	56.1404	13.6173	147.242	45.7143	10.372	143.907	82.0513	17.458	148.315	54.2373	9.6042	88.5898	46.3768	46.5665	70.8664	45.0704	9.333	110.879	55.1724	2.577	118.837	41.5584	38.53	76.011	62.7451	2.726	146.431	61.5385	8.904	149.765	41.5584
33	47.8261	10	85.3817	44.5946	9.072	97.808	48.5294	10.57	169.331	51.5625	11.068	133.49	48.5294	16.0583	115.382	55.9322	11.138	114.2	57.8947	13.9069	132.89	47.1429	13.397	139.68	84.6154	17.792	149.7	55.9322	11.7942	92.1786	47.8261	37.4766	80.3029	46.4789	14.154	107.332	56.8966	3.111	114.219	42.8571	31.133	79.321	64.7059	5.709	157.1	63.4615	10.276	153.938	42.8571
34	49.2754	10.962	78.9049	45.9459	10.099	105.627	50	10.306	186.418	53.125	11.566	136.623	50	16.6461	118.486	57.6271	12.658	110.79	59.6491	12.293	121.261	48.5714	14.5442	133.724	87.1795	16.977	152.972	57.6271	14.367	96.3393	49.2754	31.2125	90.2338	47.8873	18.668	104.489	58.6207	3.944	107.222	44.1558	16.286	76.545	66.6667	8.78	163.058	65.3846	11.571	156.381	44.1558
35	50.7246	12.074	76.9263	47.2973	11.403	116.107	51.4706	10.9	192.656	54.6875	13.39	134.878	51.4706	17.1586	128.747	59.322	13.178	107.566	61.4035	10.5958	117.846	50	17.2434	136.317	89.7436	14.495	159.32	59.322	16.2661	101.502	50.7246	20.9502	95.9794	49.2958	17.919	95.594	60.3448	5.379	105.118	45.4545	5.457	76.977	68.6275	11.128	151.864	67.3077	12.012	152.921	45.4545
36	52.1739	13.542	77.3522	48.6486	14.518	126.874	52.9412	11	182.2	56.25	14.998	125.521	52.9412	17.5562	138.895	61.0169	13.203	105.881	63.1579	10.6714	121.243	51.4286	17.4308	136.661	92.3077	13	154.253	61.0169	16.2557	103.194	52.1739	13.2695	93.3406	50.7042	14.087	87.873	62.069	7.084	105.186	46.7532	1.128	80.844	70.5882	11.894	141.066	69.2308	12.87	146.072	46.7532
37	53.6232	13.687	80.5296	50	16.109	142.929	54.4118	11	172.2	57.8125	15.284	122.328	54.4118	18.5403	141.187	62.7119	14.225	108.508	64.9123	10.0739	122.537	52.8571	14.6538	135.103	94.8718	12.788	143.56	62.7119	14.8676	100.617	53.6232	10.0207	92.2319	52.1127	10.863	86.214	63.7931	10.108	104.15	48.0519	0.03	84.689	72.549	12.814	133.748	71.1538	12.273	139.868	48.0519
38	55.0725	12.925	87.2079	51.3514	15.667	158.682	55.8824	11.4	168.8	59.375	15.092	113.005	55.8824	24.3174	142.523	64.4068	15	112.744	66.6667	10.1729	122.972	54.2857	11.833	137.073	97.4359	11.44	138.846	64.4068	13.3063	96.836	55.0725	11.4418	90.8385	53.5211	8.78	85.856	65.5172	14.811	98.6119	49.3506	0	84.236	74.5098	11.681	125.194	73.0769	11.153	144.28	49.3506
39	56.5217	12.763	93.0392	52.7027	15.398	166.714	57.3529	12	172	60.9375	14.616	109.122	57.3529	29.5007	141.88	66.1017	14.775	117.292	68.4211	9.5372	125.644	55.7143	9.7102	136.569	100	12.745	128.443	66.1017	13.6374	90.9524	56.5217	14.874	87.4841	54.9296	7.972	85.26	67.2414	16.156	96.2446	50.6494	0	82.897	76.4706	9.257	118.332	75	10.935	151.406	50.6494
40	57.971	14.635	99.3547	54.0541	16.81	161.864	58.8235	12	175.8	62.5	14.754	116.662	58.8235	35.6135	138.634	67.7966	15.492	123.071	70.1754	10.8061	130.535	57.1429	8.2094	141.466				67.7966	16.1258	88.1382	57.971	15.431	82.0109	56.338	7.845	90.717	68.9655	14.48	94.0211	51.9481	0	84.13	78.4314	8	115.514	76.9231	10.468	151.64	51.9481
41	59.4203	13.63	101.419	55.4054	15.926	162.743	60.2941	12.4	178.2	64.0625	15.326	129.25	60.2941	35.1546	123.828	69.4915	16.357	124.906	71.9298	11.615	137.34	58.5714	6.4132	148.595				69.4915	17.7486	82.7249	59.4203	13.1084	79.2541	57.7465	7.063	93.014	70.6897	11.344	97.9088	53.2468	0.709	80.83	80.3922	8.042	115.076	78.8462	11	154.414	53.2468
42	60.8696	13.239	101.406	56.7568	14.576	160.714	61.7647	13.8	176.4	65.625	16.167	139.739	61.7647	30.9625	115.71	71.1864	16.31	120.882	73.6842	11.0266	141.453	60	5.938	158.336				71.1864	19.048	80.6485	60.8696	8.633	75.4525	59.1549	7	92.703	72.4138	8.096	98.3979	54.5455	1.707	80.809	82.3529	9.02	112.013	80.7692	11.009	153.682	54.5455
43	62.3188	12.938	101.591	58.1081	13.492	158.808	63.2353	15.4	166.6	67.1875	16.835	139.876	63.2353	27.1828	104.899	72.8814	16.028	117.06	75.4386	11.6138	146.879	61.4286	5.338	154.117				72.8814	20.8683	83.4895	62.3188	6	70.2449	60.5634	8.071	94.835	74.1379	5.603	106.968	55.8442	2	84.138	84.3137	10.234	113.514	82.6923	11.98	146.342	55.8442
44	63.7681	12.726	100.23	59.4595	12	156.682	64.7059	15.6	158	68.75	15.317	135.624	64.7059	23.0435	102.86	74.5763	16.346	119.829	77.193	11.8834	152.93	62.8571	5.0042	154.576				74.5763	20.0647	85.6457	63.7681	6	66.9816	61.9718	9.612	99.589	75.8621	4.365	114.349	57.1429	2.703	85.446	86.2745	11.957	115.92	84.6154	12.638	149.867	57.1429
45	65.2174	12.122	96.3202	60.8108	12	144.795	66.1765	15.4	155	70.3125	15.038	128.461	66.1765	21.6059	115.786	76.2712	16.59	124.154	78.9474	11.9011	159.441	64.2857	5.7034	158.875				76.2712	18.3098	88.6731	65.2174	7.5279	67.5215	63.3803	11.095	109.377	77.5862	4.376	122.449	58.4416	3	86.608	88.2353	15.796	117.275	86.5385	13	151.807	58.4416
46	66.6667	13.083	91.6948	62.1622	13.498	138.757	67.6471	15.6	155.4	71.875	16.672	130.915	67.6471	20.1396	125.373	77.9661	15.633	124.404	80.7018	10.9228	161.099	65.7143	6	156.957				77.9661	18.2735	93.3126	66.6667	10.1958	64.5892	64.7887	13.03	116.08	79.3103	5.761	128.741	59.7403	4.149	84.931	90.1961	17.851	118.849	88.4615	12.555	152.259	59.7403
47	68.1159	13.492	87.6192	63.5135	14.985	137.475	69.1176	15	161.2	73.4375	17.339	140.95	69.1176	20.1505	129.024	79.661	15.453	126.993	82.4561	11.812	156.777	67.1429	6.0362	156.157				79.661	18.714	93.4368	68.1159	11.4719	64.2004	66.1972	13.584	118.689	81.0345	9.643	133.154	61.039	5.57	81.241	92.1569	17.256	118.6	90.3846	11.994	147.988	61.039
48	69.5652	13.257	83.8384	64.8649	15.833	133.983	70.5882	15.4	175.8	75	17.78	135.936	70.5882	19.4036	139.642	81.3559	15.524	132.059	84.2105	13.7493	150.734	68.5714	6	162.142				81.3559	19.3472	91.1138	69.5652	11.4745	63.7156	67.6056	13.44	115.507	82.7586	22.963	139.73	62.3377	6.361	78.695	94.1176	17.902	120.223	92.3077	12.783	150.243	62.3377
49	71.0145	13.108	82.502	66.2162	14.961	133.891	72.0588	15.6	188.8	76.5625	17.89	128.322	72.0588	18.4773	148.279	83.0508	17.002	134.936	85.9649	13.0251	139.403	70	6.0118	164.077				83.0508	20.4923	93.0757	71.0145	10.7497	67.1567	69.0141	12.579	113.987	84.4828	52.386	143.856	63.6364	6.833	78.78	96.0784	16.825	123.143	94.2308	15.072	155.517	63.6364
50	72.4638	13.012	86.1092	67.5676	14.935	138.632	73.5294	15.4	194.6	78.125	16.328	125.355	73.5294	21.0572	152.123	84.7458	20.923	135.973	87.7193	12.4514	136.665	71.4286	6.1126	169.374				84.7458	22.136	95.6065	72.4638	9.9398	67.7201	70.4225	12.361	113.278	86.2069	91.351	141.478	64.9351	7	81.285	98.0392	12.582	121.496	96.1538	19.133	150.025	64.9351
51	73.913	12.626	90.2813	68.9189	16	143.432	75	16	196.2	79.6875	15.21	114.974	75	26.3683	154.886	86.4407	24.998	139.248	89.4737	11.6194	139.239	72.8571	6.8703	166.468				86.4407	22.9692	97.1272	73.913	9.9963	63.0354	71.831	12.402	113.215	87.931	109.698	132.42	66.2338	7	86.245	100	10.442	117.981	98.0769	23.836	140.375	66.2338
52	75.3623	11.661	93.5259	70.2703	15.791	145.91	76.4706	17.2	191.8	81.25	15.254	110.971	76.4706	33.3308	153.542	88.1356	27.139	146.181	91.2281	11.9283	139.857	74.2857	7.1783	156.847				88.1356	23.5918	95.973	75.3623	9.135	61.745	73.2394	11.617	114.339	89.6552	80.704	124.841	67.5325	6.313	87.696				100	27.668	133.726	67.5325
53	76.8116	11.607	99.5776	71.6216	13.92	142.841	77.9412	19.8	183.4	82.8125	15.142	112.47	77.9412	38.8724	149.743	89.8305	27.869	147.784	92.9825	10.8814	141.34	75.7143	7.1858	146.839				89.8305	25.3913	91.4695	76.8116	7.5269	69.3314	74.6479	11.103	109.332	91.3793	40.28	124.161	68.8312	6	84.497							68.8312
54	78.2609	13.262	103.223	72.973	13.12	133.471	79.4118	20.6	181.6	84.375	16.495	115.635	79.4118	40.8605	142.791	91.5254	27.374	148.233	94.7368	9.623	139.695	77.1429	6.9291	150.128				91.5254	26.3697	84.9853	78.2609	7	75.9949	76.0563	9.764	103.511	93.1034	16.627	125.152	70.1299	6	85.05							70.1299
55	79.7101	13.454	103.815	74.3243	15.362	116.101	80.8824	18.8	188.6	85.9375	16.898	127.302	80.8824	38.7159	129.913	93.2203	27.404	148.537	96.4912	9.1823	138.418	78.5714	6.4213	143.301				93.2203	26.0305	77.5042	79.7101	7	80.034	77.4648	9.259	99.199	94.8276	7.861	125.305	71.4286	6.681	88.557							71.4286
56	81.1594	12.309	93.8242	75.6757	15.986	99.598	82.3529	16.2	187.8	87.5	16.173	135.041	82.3529	33.1918	114.046	94.9153	25.352	145.829	98.2456	11.8344	134.088	80	6.4983	137.264				94.9153	26.0579	74.9689	81.1594	7.7989	79.1968	78.8732	8.814	97.658	96.5517	6.51	124.707	72.7273	7	95.375							72.7273
57	82.6087	11.944	82.0226	77.027	14.252	92.76	83.8235	13.8	175	89.0625	15.316	132.188	83.8235	26.5384	110.053	96.6102	23.119	141.308	100	14.9932	128.513	81.4286	6	135.585				96.6102	25.0078	75.5331	82.6087	9.1607	74.996	80.2817	8.248	92.751	98.2759	6.932	116.074	74.026	7.456	98.207							74.026
58	84.058	11.932	74.5786	78.3784	11.124	82.445	85.2941	13.274	161.537	90.625	14.609	128.7	85.2941	22.1084	107.682	98.3051	22.664	133.014				82.8571	6	138.114				98.3051	22.7448	75.2605	84.058	10	69.5077	81.6901	8.257	89.339	100	7	106.73	75.3247	7.517	92.651							75.3247
59	85.5072	12.7	71.5886	79.7297	11.73	75.168	86.7647	14.989	156.003	92.1875	15.96	124.04	86.7647	21.644	111.503	100	23.799	123.634				84.2857	6	138.579				100	23.6758	74.4724	85.5072	10	63.0703	83.0986	8.582	87.557				76.6234	7.927	85.851							76.6234
60	86.9565	13.445	67.5495	81.0811	14.702	77.658	88.2353	15.897	149.155	93.75	18.218	133.853	88.2353	21.9058	121.529							85.7143	6.2459	135.643							86.9565	7.9162	62.0148	84.507	8	87.361				77.9221	8.552	82.505							77.9221
61	88.4058	12.879	63.0332	82.4324	16.062	93.197	89.7059	16.71	141.875	95.3125	18.032	132.364	89.7059	20.8626	126.624							87.1429	6.1313	128.919							88.4058	6.3919	65.1196	85.9155	7.984	84.929				79.2208	9.166	81.38							79.2208
62	89.8551	12.62	58.0938	83.7838	16.781	111.139	91.1765	15.906	130.545	96.875	17.185	123.441	91.1765	18.0687	134.549							88.5714	6.2607	118.253							89.8551	6	70.5981	87.3239	8	88.62				80.5195	9.632	81.746							80.5195
63	91.3043	13	53.4409	85.1351	17.203	126.255	92.6471	15.331	119.907	98.4375	16.579	112.486	92.6471	18.1178	138.565							90	6	111.754							91.3043	6.3978	76.8281	88.7324	8.796	95.918				81.8182	9.553	86.094							81.8182
64	92.7536	12.573	51.1722	86.4865	15.711	130.742	94.1176	14.816	115.185	100	16.597	104.262	94.1176	18.4183	139.774							91.4286	6.0184	105.108							92.7536	7.1655	78.3068	90.1408	9.19	99.121				83.1169	8.437	90.068							83.1169
65	94.2029	11.038	49.9295	87.8378	15.171	129.431	95.5882	14.149	113.183				95.5882	18.966	145.103							92.8571	6.6733	99.575							94.2029	7.9701	79.4489	91.5493	9.793	100.612				84.4156	7.347	91.845							84.4156
66	95.6522	10.49	46.9814	89.1892	17.167	125.219	97.0588	15.302	109.221				97.0588	19.2334	143.101							94.2857	7.0272	97.782							95.6522	9.9652	79.626	92.9577	10.798	100.124				85.7143	6.728	91.703							85.7143
67	97.1014	11.68	44.0938	90.5405	16.961	125.944	98.5294	16.037	101.387				98.5294	19.1463	129.291							95.7143	7.6616	102.901							97.1014	13.0074	79.855	94.3662	12.558	97.385				87.013	6	91.162							87.013
68	98.5507	13.361	42.3215	91.8919	15.506	130.532	100	16.632	92.392				100	18.2932	111.916							97.1429	7.8449	108.23							98.5507	16.2471	81.1873	95.7746	14.124	98.992				88.3117	6.067	82.723							88.3117
69	100	13.296	40.9957	93.2432	15.116	138.97																98.5714	8	107.708							100	16.3408	81.9006	97.1831	15.282	100.404				89.6104	6.644	75.211							89.6104
70				94.5946	15	145.835																100	8	107.743										98.5915	15.534	97.093				90.9091	6.828	74.577							90.9091
71				95.9459	15.634	142.64																												100	14.879	89.608				92.2078	5.939	79.994							92.2078
72				97.2973	15.581	135.884																																		93.5065	5.019	85.515							93.5065
73				98.6486	15.257	129.423																																		94.8052	5.977	85.423							94.8052
74				100	15.679	120.227																																		96.1039	6.854	82.724							96.1039
75																																								97.4026	6.632	77.921							97.4026
76																																								98.7013	6.345	68.73							98.7013
77																																								100	6.011	60.622							100
78
79
80
81
82
83
84
85
86
87
88
89
90
91
92
93
94
95
96
97
	0			0			0			0			0			0			0			0			0			0			0			0			0			0			0			0			0
	5	13.1693	137.915	5	16.8977	165.093	5	14.4	213	5	11.6238	216.473	5	15.8187	123.964	5	15.5977	149.167	5	3.98033	176.531	5	5.79573	180.466	5	3.512	153.181	5	18.6258	128.435	5	33.3368	139.969	5	9.29475	188.375	5	3.869	146.243	5	4.745	179.47	5	3.1	143.192	5	4.899	190.848	5
	10	10.8133	125.136	10	25.1263	175.236	10	11.7467	200.507	10	14.1883	167.786	10	14.3496	103.162	10	11.3207	147.164	10	1.19303	176.56	10	5.37405	168.99	10	4.0905	155.716	10	13.582	117.624	10	18.2483	141.859	10	7.53875	137.658	10	5.81167	137.051	10	2.13875	159.955	10	0.387667	138.628	10	4.738	215.503	10
	15	7.45975	105.343	15	14.8335	160.769	15	16.62	209.6	15	14.3037	136.791	15	7.2487	129.681	15	5.111	137.087	15	2.51157	154.947	15	5.292	144.882	15	18.244	142.721	15	23.903	97.5692	15	7.9253	131.841	15	7.61067	98.7197	15	7.52867	103.682	15	0	106.87	15	0	126.487	15	13.4845	185.331	15
	20	33.8027	99.1878	20	51.707	166.156	20	122.707	203.213	20	11.217	137.594	20	8.8282	122.706	20	7.25133	128.488	20	34.7369	125.145	20	5.00967	121.767	20	50.7715	137.819	20	73.9185	85.4392	20	1.94323	99.3267	20	7.2095	87.6778	20	30.6217	75.8542	20	0.417	84.4103	20	1.10933	109.975	20	62.505	168.253	20
	25	113.438	70.1014	25	35.4213	155.042	25	149.073	141.532	25	6.621	138.95	25	3.13495	100.189	25	82.7033	104.997	25	63.4189	110.336	25	6.26778	102.766	25	101.97	108.246	25	90.5868	78.3093	25	0.496775	71.7521	25	15.42	79.7403	25	42.4453	56.6422	25	15.4913	78.5365	25	31.684	95.6839	25	93.6057	148.335	25
	30	34.5823	51.5104	30	115.946	124.403	30	30.0005	104.024	30	3.185	132.031	30	5.31622	82.9443	30	197.699	82.2185	30	13.1853	119.024	30	34.4701	80.8973	30	108.325	93.1262	30	54.6158	75.0679	30	0.0142	57.5909	30	103.425	68.9112	30	56.3307	56.0739	30	91.3035	59.6707	30	161.591	94.9029	30	93.908	138.428	30
	35	9.4495	60.6107	35	99.2607	121.82	35	193.236	110.012	35	48.5133	90.8113	35	27.2804	72.034	35	74.388	72.4942	35	5.03955	157.776	35	21.124	85.3153	35	44.8325	94.8454	35	55.1232	79.065	35	16.911	57.7264	35	129.855	71.3063	35	128.908	71.5212	35	40.191	55.759	35	192.138	95.7009	35	151.641	125.526	35
	40	9.82967	94.2872	40	7.80575	143.593	40	128.612	99.4295	40	210.087	85.8213	40	21.5389	112.392	40	7.06	105.643	40	7.1047	184.359	40	6.19988	129.59	40	10.626	118.981	40	55.1069	77.3121	40	89.3147	62.8279	40	19.3463	79.3322	40	68.8697	83.0144	40	6.67275	66.2843	40	146.083	97.3607	40	100.626	124.854	40
	45	11.0843	113.04	45	8.91675	110.408	45	54.2	112.206	45	107.8	104.324	45	13.7472	142.252	45	6.30133	139.737	45	8.39177	174.95	45	5.7951	148.948	45	4.026	137.894	45	22.6161	82.3537	45	64.8552	67.9105	45	3.07533	108.344	45	6.87	77.9154	45	29.057	76.4158	45	107.713	113.896	45	25.9093	140.081	45
	50	10.3257	86.5891	50	13.0323	122.884	50	14.2867	160.774	50	15.9075	131.817	50	15.7625	124.12	50	8.102	132.326	50	8.82533	171.605	50	13.8891	138.407	50	3.6035	134.581	50	7.05117	85.5181	50	38.4185	80.4677	50	15.0185	104.574	50	0.229667	97.9899	50	1.65375	81.6865	50	16.3467	129.158	50	13.205	158.953	50
	55	13.101	78.2694	55	15.996	157.547	55	10.8015	183.368	55	11.6883	135.155	55	17.4753	131.829	55	10.3837	118.386	55	10.3753	166.364	55	15.2903	136.288	55	4.141	126.7	55	7.352	88.3054	55	14.7468	93.8506	55	10.4255	86.3007	55	1.091	115.52	55	0.604	82.1665	55	0	127.745	55	9.19767	148.07	55
	60	13.4883	95.2552	60	13.9985	159.737	60	11.8	172.2	60	15.1247	120.285	60	29.8105	141.012	60	12.3247	110.852	60	13.2724	133.797	60	7.5677	146.242	60	15.67	112.492	60	14.1424	96.6734	60	13.7138	84.8969	60	7.30267	92.1447	60	3.21067	113.426	60	2.963	85.2807	60	0	146.001	60	7.80567	144.145	60
	65	12.9677	101.076	65	14.079	138.752	65	14.3	169.8	65	14.8987	118.345	65	29.0859	111.824	65	14.1427	109.044	65	10.447	120.542	65	5.4959	156.476	65	31.057	101.759	65	14.8099	100.216	65	6.87767	70.893	65	10.452	104.97	65	7.52367	104.818	65	6.441	80.0002	65	2.99567	150.652	65	9.59	151.852	65
	70	12.9885	89.8681	70	15.2987	138.652	70	15.3333	157.2	70	16.1063	138.413	70	20.632	123.395	70	15.5413	121.756	70	9.85505	124.308	70	6.012	159.833	70	24.011	95.9833	70	15.8373	87.2718	70	10.1675	65.0067	70	13.201	116.061	70	15.149	96.2925	70	6.43767	86.146	70	9.954	157.461	70	12.151	151.791	70
	75	12.9153	86.2975	75	14.5482	134.581	75	15.6	188.85	75	16.7073	134.065	75	21.3266	148.733	75	16.228	119.257	75	11.1492	136.443	75	6.54325	164.191	75	14.1695	114.248	75	19.9937	83.2612	75	10.2286	65.9707	75	11.8707	112.541	75	8.34767	101.091	75	6.78425	91.7972	75	12.1297	133.336	75	11.4537	145.184	75
	80	12.496	100.035	80	13.273	87.4928	80	18.4	188.25	80	16.802	126.147	80	34.858	150.24	80	15.892	125.184	80	11.7994	153.083	80	6.75863	144.383	80	15.3735	140.345	80	18.4324	91.8075	80	7.66547	71.7763	80	9.279	100.123	80	4.834	121.846	80	8.2905	85.5968	80	8.6285	116.923	80	10.801	152.487	80
	85	12.0617	83.4751	85	15.8483	93.998	85	16.2667	183.8	85	15.6303	113.025	85	32.8154	118.004	85	17.8163	134.323	85	12.1614	156.203	85	6.12458	137.386	85	17.625	149.008	85	20.6585	93.2653	85	8.98653	74.5668	85	8.27175	89.252	85	28.3307	138.913	85	8.74225	87.4382	85	9.09867	113.534	85	11.8757	149.964	85
	90	12.911	65.0663	90	16.313	127.912	90	15.2175	152.142	90	16.129	131.51	90	21.6302	116.834	90	26.6687	144.405	90	12.3653	138.436	90	6.15948	123.642	90	15.736	156.146	90	23.9841	94.8566	90	7.57702	65.2007	90	8.26	89.8223	90	93.9177	132.913	90	6.35975	85.1998	90	13.8765	116.597	90	12.7775	152.033	90
	95	12.2037	51.5142	95	15.6457	135.32	95	15.351	121.879	95	16.2623	128.864	95	18.2016	137.63	95	26.71	147.533	95	10.8109	140.297	95	6.42973	103.555	95	12.894	148.907	95	26.1527	79.1528	95	7.1778	78.1946	95	10.5847	99.3105	95	21.5893	124.873	95	5.94075	81.3773	95	17.6697	119.224	95	13.283	151.249	95
	100	12.2068	43.5981	100	15.5378	132.043	100	15.53	104.046	100	17.0983	118.138	100	18.9097	132.353	100	23.194	132.652	100	12.0033	133.673	100	7.87662	106.645	100	12.0925	133.644	100	23.8095	75.0887	100	13.8901	80.6422	100	14.9547	96.5243	100	6.814	115.837	100	6.4605	72.4993	100	13.283	120.873	100	23.5457	141.375	100
[truncated: 53 more columns]

## Sheet: Summary
% Chromosome Length
	FISH	PI	FISH	PI	FISH	PI
	Mean	Mean	STDDEV	STDDEV	SEM	SEM
5	8.76502	154.917	10.9787	29.9804	1.94078	5.29983
10	7.20871	143.548	6.84428	29.1517	1.20991	5.15333
15	8.23779	123.529	8.65445	32.0197	1.5299	5.66033
20	27.3628	109.274	31.3201	33.5443	5.53667	5.92985
25	44.2482	90.5164	38.6943	31.7148	6.84025	5.60644
30	64.71	78.4644	50.393	27.4471	8.90832	4.852
35	63.1094	80.4191	49.9698	23.5019	8.83349	4.15458
40	38.7388	94.2705	50.446	26.7361	8.91767	4.72631
45	22.5121	104.965	29.438	27.5768	5.20396	4.87493
50	10.224	108.842	9.76295	27.1789	1.72586	4.8046
55	7.03187	112.542	6.07946	29.2289	1.07471	5.16698
60	7.78894	112.431	6.59669	27.1226	1.16614	4.79465
65	8.64476	110.169	7.12002	27.1986	1.25865	4.80808
70	8.98922	109.242	6.03993	28.833	1.06772	5.097
75	9.35131	107.752	5.51643	30.7134	0.975176	5.42942
80	10.168	105.43	6.40868	30.3196	1.1329	5.35979
85	11.324	105.757	6.85724	28.9108	1.2122	5.11075
90	13.2491	104.736	15.6316	28.7849	2.7633	5.08849
95	10.7704	101.703	6.47037	29.3734	1.14381	5.19254
100	11.049	94.7654	6.34718	28.8476	1.12203	5.09959
