# Supplementary material for: Large domains of heterochromatin direct the formation of short mitotic chromosome loops
Source: eLife. 2020 Sep 11;9:e57212. doi: 10.7554/eLife.57212 (PMC7515631; doi:10.7554/eLife.57212)
Supplement: Figure 3—source data 3. [file elife-57212-fig3-data3.xlsx]

## Sheet: Data binned
	21	FISH	IF	22	FISH	IF	23	FISH	IF	24	FISH	IF	25	FISH	IF	27	FISH	IF	28	FISH	IF	31	FISH	IF	34	FISH	IF	38A	FISH	IF	38B	FISH	IF	39A	FISH	IF	39B	FISH	IF	41	FISH	IF	42	FISH	IF
	X	Y	Y	X	Y	Y	X	Y	Y	X	Y	Y	X	Y	Y	X	Y	Y	X	Y	Y	X	Y	Y	X	Y	Y	X	Y	Y	X	Y	Y	X	Y	Y	X	Y	Y	X	Y	Y	X	Y	Y
0	0	16	134	0	3	204	0	10	172	0	9	163	0	29	172	0	15	184	0	2	161	0	11	168	0	3	140	0	2	149	0	2	155	0	1	173	0	2	200	0	5	99	0	2	176
1	2.43902	17.4598	142.424	1.6129	2.0612	219.808	1.72414	7.673	196.136	2.38095	7.1753	167.698	1.6129	27.711	185.121	1.51515	13.8	185.483	1.5625	2	169.133	1.66667	12	176	1.13636	3.756	148.289	2.32558	2	160.862	2.32558	2.9897	170.173	1.25	1.4961	167.569	1.5873	2	200.027	1.66667	5	107.942	1.47059	2.2425	174.295
2	4.87805	12.3844	145.62	3.22581	2	220.893	3.44828	6.656	211.606	4.7619	6.3274	163.128	3.22581	22.081	201.504	3.0303	11.361	177.55	3.125	2.5628	176.203	3.33333	13	183	2.27273	4.512	152.632	4.65116	2	176.181	4.65116	2.6957	185.602	2.5	1.2615	166.203	3.1746	2.9728	200.013	3.33333	5	126.198	2.94118	2.029	164.198
3	7.31707	6.2461	150.139	4.83871	2	214.57	5.17241	6.25	221.854	7.14286	6.981	151.503	4.83871	15.475	209.104	4.54545	13.391	165.525	4.6875	2.382	180.855	5	14	176	3.40909	5.278	156.55	6.97674	2.995	175.77	6.97674	2.5321	174.441	3.75	1.4884	162.125	4.7619	3	211.504	5	5.8544	124.292	4.41176	2	166.544
4	9.7561	4.3008	151.6	6.45161	2	212.078	6.89655	7.676	225.738	9.52381	8.907	141.829	6.45161	10.59	207.599	6.06061	15.521	149.055	6.25	2.176	179.724	6.66667	18	170	4.54545	6.034	157.376	9.30233	3	149.882	9.30233	2.3761	158.556	5	1.9846	161.745	6.34921	3	220.467	6.66667	5.0037	120.208	5.88235	2.0263	167.67
5	12.1951	3.8633	147.384	8.06452	2.2918	212.175	8.62069	9.887	232.721	11.9048	11.8256	139.356	8.06452	7.075	195.234	7.57576	16.095	137.689	7.8125	2	168.256	8.33333	18	167	5.68182	6.84	157.054	11.6279	3.991	140.195	11.6279	2.9523	161.723	6.25	2.7974	169.754	7.93651	3	217.304	8.33333	5	122.651	7.35294	2.8507	164.118
6	14.6341	4.0615	141.476	9.67742	2.1479	212.265	10.3448	11.204	235.45	14.2857	14.7907	132.821	9.67742	5.619	181.831	9.09091	15.499	128.89	9.375	2	168.289	10	23	172	6.81818	7.497	154.924	13.9535	4.349	141.056	13.9535	3.9861	171.528	7.5	2.9817	174.724	9.52381	3	210.447	10	5	121.578	8.82353	3.8209	161.287
7	17.0732	4.2599	141.59	11.2903	2.2008	202.331	12.069	11.533	233.196	16.6667	14.8712	126.21	11.2903	5.778	178.132	10.6061	14.681	127.516	10.9375	2	149.304	11.6667	27	173	7.95455	7.708	154.483	16.2791	4.993	145.415	16.2791	4.8226	156.088	8.75	3.473	164.766	11.1111	5.2089	197.62	11.6667	5.3303	110.755	10.2941	6.6121	151.501
8	19.5122	4.5351	144.749	12.9032	3.1733	182.395	13.7931	9.325	225.88	19.0476	10.9392	117.635	12.9032	7.977	181.194	12.1212	15.643	125.385	12.5	1.7085	137.619	13.3333	26	163	9.09091	6.903	152.884	18.6047	5.463	129.517	18.6047	6.1096	133.476	10	3.9691	150.785	12.6984	6.9635	183.399	13.3333	5.3805	107.272	11.7647	10.0588	156.7
9	21.9512	5.7233	148.755	14.5161	4.7737	173.655	15.5172	8.349	211.276	21.4286	6.1162	117.804	14.5161	12.062	185.274	13.6364	16.187	115.475	14.0625	1.1649	131.166	15	23	168	10.2273	5.391	167.795	20.9302	6.513	118.758	20.9302	6.6789	121.476	11.25	4	152.85	14.2857	7.9992	177.752	15	6.8416	100.781	13.2353	11.9051	159.163
10	24.3902	8.7101	152.941	16.129	6.0766	165.601	17.2414	7.53	190.272	23.8095	2.8283	119.91	16.129	18.18	191.796	15.1515	17.931	108.903	15.625	1.0129	124.716	16.6667	26	169	11.3636	4.134	168.504	23.2558	7.164	111.648	23.2558	5.9346	109.57	12.5	3.05	155.85	15.873	7.288	178.273	16.6667	8.4103	95.5815	14.7059	11.7387	157.671
11	26.8293	14.153	154.215	17.7419	7.9735	163.319	18.9655	6.206	166.021	26.1905	2.3274	120.073	17.7419	22.065	206.883	16.6667	21.914	105.389	17.1875	1.764	115.366	18.3333	23	166	12.5	2.683	161.954	25.5814	8.273	102.352	25.5814	5.3227	105.124	13.75	2.05	157.9	17.4603	5.6648	177.791	18.3333	7.5821	92.1809	16.1765	9.1664	155.927
12	29.2683	18.8156	148.137	19.3548	7.0237	155.652	20.6897	8.127	148.563	28.5714	4.7567	122.515	19.3548	25.538	212.416	18.1818	23.237	98.655	18.75	2	105.109	20	18	164	13.6364	2	166.959	27.907	8.12	106.555	27.907	4.9093	101.34	15	2	155.15	19.0476	4	180.2	20	6.5863	90.0285	17.6471	6.0429	145.057
13	31.7073	19.5325	140.598	20.9677	5.4366	149.1	22.4138	16.178	135.061	30.9524	11.0243	122.092	20.9677	23.344	202.155	19.697	20.715	94.455	20.3125	2.2321	99.287	21.6667	12.445	158.283	14.7727	2	153.512	30.2326	8.29	102.861	30.2326	4.1866	104.94	16.25	2	156.9	20.6349	3.85	168.8	21.6667	5.0238	88.7863	19.1176	4.2931	118.163
14	34.1463	14.491	130.411	22.5806	4.3015	147.251	24.1379	23.798	120.716	33.3333	22.8178	122.515	22.5806	19.146	195.452	21.2121	16.214	89.43	21.875	2.8156	98.1	23.3333	9.55	145.434	15.9091	2.095	132.492	32.5581	6.688	102.367	32.5581	3.3548	115.499	17.5	2	157	22.2222	2.85	160.5	23.3333	4.0158	88.0128	20.5882	4	93.247
15	36.5854	7.3841	124.691	24.1935	4	148.032	25.8621	28.924	106.2	35.7143	33.2348	124.876	24.1935	14.539	192.525	22.7273	20.683	84.513	23.4375	3.5881	102.713	25	6.609	134.368	17.0455	2.88	106.503	34.8837	3.839	104.419	34.8837	3.0623	125.093	18.75	2.95	145.6	23.8095	2	151.7	25	4	87.9976	22.0588	4	81.909
16	39.0244	4.2488	117.607	25.8065	4.5239	145.122	27.5862	25.708	102.681	38.0952	30.823	125.079	25.8065	10.506	189.878	24.2424	30.054	91.338	25	4.3606	110.013	26.6667	4.178	123.702	18.1818	3	81.556	37.2093	1.993	108.692	37.2093	2.5942	134.649	20	3.123	148.249	25.3968	2	149.7	26.6667	4	91.4583	23.5294	3.9954	85.679
17	41.4634	3.1195	114.39	27.4194	4.9409	146.047	29.3103	18.171	102.529	40.4762	19.2438	123.891	27.4194	8.634	180.636	25.7576	32.559	97.124	26.5625	4.4978	119.675	28.3333	2.639	115.944	19.3182	3.127	64.612	39.5349	0.059	118.7	39.5349	2.1355	142.861	21.25	2.5009	148.255	26.9841	1.85	148.15	28.3333	4	95.728	25	3.7377	95.856
18	43.9024	5.0313	105.952	29.0323	4.055	142.958	31.0345	11.932	102.101	42.8571	9.4742	125.216	29.0323	8.346	163.692	27.2727	26.172	98.791	28.125	3.6779	121.516	30	2.683	109.587	20.4545	3.305	55.176	41.8605	0	125.141	41.8605	1.2203	148.799	22.5	2.5484	143.429	28.5714	1	150.35	30	4.9796	106.209	26.4706	3.696	113.44
19	46.3415	6.6465	101.13	30.6452	3.1692	140.554	32.7586	8.837	104.298	45.2381	4.8227	125.592	30.6452	7.365	149.859	28.7879	21.616	99.661	29.6875	3.0858	116.143	31.6667	3.494	104.141	21.5909	3.642	51.644	44.186	0.233	128.874	44.186	1	146.663	23.75	2.4751	141.936	30.1587	1	156.5	31.6667	5.0942	114.03	27.9412	3.5373	136.665
20	48.7805	8.8128	95.2034	32.2581	2.0032	129.617	34.4828	8.756	110.337	47.619	3.9273	122.495	32.2581	6.418	138.238	30.303	20.858	98.811	31.25	2.9879	115.622	33.3333	6.466	98.655	22.7273	4	57.343	46.5116	0.368	126.732	46.5116	1.0535	144.306	25	3.0194	144.529	31.746	1.15	147.85	33.3333	4.0713	113.025	29.4118	3.347	152.42
21	51.2195	11.2159	88.8136	33.871	1.2559	128.155	36.2069	9.557	114.206	50	5.881	116.254	33.871	7.404	132.122	31.8182	19.218	101.484	32.8125	3.5413	112.683	35	9.093	101.231	23.8636	4	72.936	48.8372	1.432	133.937	48.8372	1.2825	128.172	26.25	3.916	146.785	33.3333	2.6	148.8	35	4.0011	114.95	30.8824	3.7071	161.478
22	53.6585	12.8566	81.3566	35.4839	1	135.567	37.931	10.516	113.621	52.381	14.7257	111.865	35.4839	8.412	128.819	33.3333	16.862	107.779	34.375	3.2839	102.275	36.6667	8.659	107.478	25	5.032	95.754	51.1628	7.997	132.272	51.1628	2.2602	100.877	27.5	4	151.51	34.9206	7.1125	158.315	36.6667	4	109.097	32.3529	3.4494	152.516
23	56.0976	13.2889	71.1062	37.0968	1	140.348	39.6552	10.943	113.521	54.7619	25.4449	114.184	37.0968	9.664	127.289	34.8485	12.268	107.688	35.9375	2.3402	93.936	38.3333	5.7	104.212	26.1364	6.074	113.859	53.4884	31.545	121.206	53.4884	5.4793	84.227	28.75	4	154.275	36.5079	13.8587	156.834	38.3333	3.0382	96.7098	33.8235	3.1917	142.389
24	58.5366	12.7689	62.8445	38.7097	1	139.027	41.3793	10.072	115.052	57.1429	32.2021	112.967	38.7097	11.49	125.768	36.3636	7.575	105.884	37.5	1.8661	91.32	40	3.827	102.902	27.2727	7.271	119.12	55.814	80.005	119.343	55.814	12.3954	70.028	30	5.3364	150.877	38.0952	26.1285	158.248	40	2.4309	90.1175	35.2941	2.9126	130.197
25	60.9756	9.4084	60.154	40.3226	1	133.896	43.1034	8.581	115.204	59.5238	33.3556	113.828	40.3226	12.202	125.209	37.8788	3.072	102.017	39.0625	1.8836	87.665	41.6667	2.883	106.255	28.4091	7.425	122.44	58.1395	134.804	113.541	58.1395	26.5969	59.906	31.25	8.7098	140.525	39.6825	27.2368	165.259	41.6667	2.9739	88.1885	36.7647	2.6553	118.174
26	63.4146	9.3559	60.8014	41.9355	1	127.639	44.8276	8.121	116.097	61.9048	30.9119	115.693	41.9355	13.479	130.276	39.3939	1.549	105.025	40.625	1.6097	84.166	43.3333	9.234	109.609	29.5455	6.05	116.797	60.4651	129.496	108.136	60.4651	46.9828	60.11	32.5	11.6482	130.892	41.2698	19.395	176.599	43.3333	4.24	92.0831	38.2353	3.0308	111.795
27	65.8537	10.4319	65.9714	43.5484	0.704	120.662	46.5517	9.139	111.728	64.2857	36.416	108.916	43.5484	14.843	131.865	40.9091	1.673	109.075	42.1875	1.5991	80.696	45	26.133	116.372	30.6818	5.516	117.045	62.7907	89.79	110.276	62.7907	59.7025	68.381	33.75	11.6535	126.129	42.8571	10.4711	177.899	45	4.3697	101.298	39.7059	3	101.644
28	68.2927	15.9743	75.2459	45.1613	0.3101	113.94	48.2759	9.211	106.858	66.6667	52.8389	97.855	45.1613	15.528	129.31	42.4242	4.4	104.661	43.75	2.1887	74.308	46.6667	58.161	127.575	31.8182	5.538	115.69	65.1163	79.517	111.802	65.1163	57.5933	87.73	35	9.6714	124.004	44.4444	5.3108	180.727	46.6667	5.9458	103.78	41.1765	3	101.049
29	70.7317	28.393	96.9146	46.7742	0.79	107.586	50	14.692	107.435	69.0476	72.7773	91.4798	46.7742	16.09	134.405	43.9394	9.795	102.451	45.3125	2.5033	70.774	48.3333	102.536	130.349	32.9545	6.943	112.753	67.4419	85.407	111.973	67.4419	43.1681	115.865	36.25	5.8837	128.341	46.0317	3.8724	174.508	48.3333	10.1013	104.769	42.6471	3	101.771
30	73.1707	34.9206	113.926	48.3871	0.8956	104.377	51.7241	37.829	111.9	71.4286	82.3164	89.1532	48.3871	15.158	130.216	45.4545	21.937	105.252	46.875	1.8944	74.673	50	149.951	115.546	34.0909	9.248	115.709	69.7674	85.833	112.747	69.7674	24.4187	124.979	37.5	3.3846	129.861	47.619	2.9154	163.118	50	15.9439	103.945	44.1176	3	100.127
31	75.6098	26.0777	121.267	50	1.7006	105.448	53.4483	97.496	119.497	73.8095	76.5869	89.6545	50	11.754	129.743	46.9697	40.415	103.065	48.4375	1.1788	79.372	51.6667	162.012	107.503	35.2273	12.453	117.081	72.093	76.742	119.003	72.093	17.2337	127.357	38.75	1.932	121.559	49.2063	1.9497	165.913	51.6667	18.681	97.2287	45.5882	3	98.988
32	78.0488	14.6809	121.957	51.6129	2.1646	108.39	55.1724	153.555	122.549	76.1905	64.6503	93.5255	51.6129	11.031	132.476	48.4848	78.864	100.302	50	0.4257	81.991	53.3333	151.405	107.241	36.3636	12.448	115.446	74.4186	49.578	123.48	74.4186	15.9142	136.854	40	1.078	120.861	50.7937	1.0718	168.518	53.3333	16.7763	90.7969	47.0588	2.394	95.639
33	80.4878	8.4134	120.076	53.2258	2.3041	113.919	56.8966	161.311	125.632	78.5714	46.3755	102.461	53.2258	16.93	134.892	50	118.338	97.114	51.5625	0	85.313	55	122.164	100.799	37.5	10.483	110.853	76.7442	23.065	126.654	76.7442	15.0385	147.719	41.25	1	128.095	52.381	0.1939	167.763	55	16.0341	78.5474	48.5294	2	103.498
34	82.9268	5.6504	123.211	54.8387	1.5954	121.893	58.6207	113.203	125.911	80.9524	28.6476	117.061	54.8387	37.777	134.687	51.5152	157.85	94.021	53.125	0.727	86.197	56.6667	134.966	94.477	38.6364	5.988	106.937	79.0698	6.414	134.279	79.0698	14.2722	149.438	42.5	1	134.371	53.9683	0	155.841	56.6667	17.3044	66.2871	50	1.7014	117.097
35	85.3659	6.3085	130.662	56.4516	1.4871	131.613	60.3448	44.009	126.825	83.3333	16.4835	131.855	56.4516	75.798	131.949	53.0303	191.124	90.955	54.6875	3.0595	84.921	58.3333	176.002	97.396	39.7727	3.327	101.009	81.3953	1.039	141.934	81.3953	13.0547	139.121	43.75	1.2936	128.735	55.5556	0	142.538	58.3333	17.3457	62.0742	51.4706	1.2129	117.82
36	87.8049	8.0316	134.308	58.0645	1.2058	143.397	62.069	18.78	127.715	85.7143	13.5256	143.429	58.0645	105.627	124.677	54.5455	222.392	85.867	56.25	7.2872	89.076	60	181.959	93.55	40.9091	2.342	95.68	83.7209	0.115	136.806	83.7209	11.3817	128.142	45	2.1519	119.899	57.1429	0	134.178	60	15.2592	62.4213	52.9412	0.9326	113.495
37	90.2439	8.0715	135.603	59.6774	1.4	152.752	63.7931	18.014	135.309	88.0952	16.626	148.838	59.6774	81.809	120.068	56.0606	245.021	82.526	57.8125	11.5679	99.144	61.6667	148.361	89.738	42.0455	2	95.159	86.0465	0	135.395	86.0465	8.6021	130.549	46.25	4.715	116.518	58.7302	0.6541	117.957	61.6667	24.21	69.0162	54.4118	0.5402	114.772
38	92.6829	7.3653	131.493	61.2903	2.1346	157.222	65.5172	19.963	139.659	90.4762	25.5211	145.553	61.2903	46.447	112.636	57.5758	219.945	83.556	59.375	12.5359	102.421	63.3333	85.256	92.683	43.1818	1.364	95.121	88.3721	0	139.147	88.3721	6.2056	138.368	47.5	9.733	110.943	60.3175	2.6383	102.097	63.3333	53.1469	74.9763	55.8824	0.1163	120.567
39	95.122	6.5998	125.194	62.9032	3.1631	158.623	67.2414	18.336	137.26	92.8571	45.8965	136.924	62.9032	17.167	105.595	59.0909	179.266	85.871	60.9375	9.7472	103.954	65	40.921	97.249	44.3182	1	97.792	90.6977	0.108	140.279	90.6977	6.7885	134.651	48.75	13.3968	107.939	61.9048	5.0822	90.227	65	79.8564	82.6895	57.3529	0	120.378
40	97.561	6.3845	111.161	64.5161	6.4027	154.424	68.9655	14.936	133.65	95.2381	61.6221	137.326	64.5161	6.872	98.076	60.6061	136.088	88.026	62.5	6.86	108.28	66.6667	18.483	102.067	45.4545	1	104.753	93.0233	0.814	146.125	93.0233	8.25	127	50	11.9979	107.533	63.4921	11.911	84.647	66.6667	81.579	93.1559	58.8235	0	110.278
41	100	6.4363	92.5803	66.129	9.7246	150.397	70.6897	14.55	131.998	97.619	53.8377	139.872	66.129	4.509	95.798	62.1212	96.344	91.177	64.0625	6.57	109.43	68.3333	8.312	107.1	46.5909	1	114.492	95.3488	1.698	144.145	95.3488	9.5769	125.901	51.25	8.9294	110.071	65.0794	34.2536	88.544	68.3333	57.756	107.231	60.2941	0.1076	102.197
42				67.7419	13.5374	143.754	72.4138	21.382	127.215	100	32.3712	140.989	67.7419	4.118	96.654	63.6364	61.982	91.891	65.625	10.42	107.29	70	4.32	112.533	47.7273	0.614	112.675	97.6744	2	142.419	97.6744	8.9615	116.565	52.5	7.7684	110.453	66.6667	71.7861	96.013	70	36.4179	117.827	61.7647	0.9236	94.434
43				69.3548	15.3333	133.171	74.1379	38.322	130.747				69.3548	2.626	103.453	65.1515	30.657	91.625	67.1875	16.99	106.57	71.6667	3	113.48	48.8636	0.489	110.878	100	2.045	137.732	100	7.497	93.648	53.75	6.8816	107.982	68.254	98.2084	102.583	71.6667	21.4108	119.118	63.2353	4.4584	86.199
44				70.9677	16.3227	128.672	75.8621	73.785	138.122				70.9677	0.966	111.389	66.6667	11.533	90.723	68.75	20.57	111.56	73.3333	3.068	120.696	50	0	110.879							55	4.7989	108.751	69.8413	85.2587	112.207	73.3333	14.0714	119.042	64.7059	14.918	73.406
45				72.5806	17.4441	120.761	77.5862	93.855	141.127				72.5806	0.208	110.999	68.1818	3.367	90.6	70.3125	21.57	121.84	75	4.833	124.432	51.1364	0	109.378							56.25	3.798	112.647	71.4286	51.4255	122.678	75	10.3347	113.717	66.1765	35.5835	60.379
46				74.1935	18.4977	122.383	79.3103	83.232	148.694				74.1935	0	114.517	69.697	1.246	88.985	71.875	24.28	127.57	76.6667	5.918	128.433	52.2727	0	115.472							57.5	3	115.371	73.0159	27.5482	131.3	76.6667	7.4915	106.551	67.6471	62.7883	55.448
47				75.8065	15.8808	129.181	81.0345	67.96	168.04				75.8065	0	112.136	71.2121	1.104	92.38	73.4375	29.99	125.15	78.3333	6.854	130.737	53.4091	0	126.735							58.75	3	113.973	74.6032	21.615	140.067	78.3333	4.8912	105.32	69.1176	74.4563	56.258
48				77.4194	11.3995	135.137	82.7586	60.399	179.6				77.4194	0.122	112.078	72.7273	1.8	93.198	75	35.28	117.87	80	7	135.269	54.5455	0	135.269							60	3.8346	118.528	76.1905	25.4653	147.774	80	3.3373	110.724	70.5882	52.5097	62.021
49				79.0323	5.7822	141.528	84.4828	58.171	193.46				79.0323	2.592	112.477	74.2424	2.977	93.865	76.5625	32.44	110.58	81.6667	5.67	128.186	55.6818	0	138.912							61.25	2.9269	117.742	77.7778	25.9684	150.224	81.6667	3	105.569	72.0588	23.2324	70.155
50				80.6452	2.4699	142.935	86.2069	39.127	203.987				80.6452	6.664	109.78	75.7576	4.296	96.503	78.125	24.0551	105.406	83.3333	5.463	123.246	56.8182	0	126.12							62.5	1.7574	112.983	79.3651	20.6112	148.708	83.3333	3	102.806	73.5294	6.6525	83.69
51				82.2581	1	139.897	87.931	22.852	200.873				82.2581	11.298	112.455	77.2727	5.442	95.432	79.6875	15.5833	105.725	85	6	121.754	57.9545	2.379	115.552							63.75	1.0722	106.252	80.9524	12.2809	151.162	85	2.4171	102.746	75	0.6849	100.136
52				83.871	0.6511	143.068	89.6552	10.436	196.182				83.871	17.972	115.513	78.7879	5.915	98.468	81.25	9.6614	107.761	86.6667	6	124.05	59.0909	14.114	107.378							65	0.2291	103.489	82.5397	5.5158	151.859	86.6667	2.549	96.6812	76.4706	0	114.022
53				85.4839	0.8012	142.596	91.3793	4.932	190.695				85.4839	21.874	124.52	80.303	5.719	99.849	82.8125	5.7476	106.098	88.3333	6.182	134.158	60.2273	68.822	93.354							66.25	0.7695	96.642	84.127	2.5001	151	88.3333	2.7577	99.6105	77.9412	0	122.639
54				87.0968	0.6349	143.899	93.1034	4.834	187.678				87.0968	19.55	136.546	81.8182	5.706	99.502	84.375	2.5024	105.481	90	6.242	143.715	61.3636	146.135	78.591							67.5	2.2091	85.827	85.7143	3.0109	149.138	90	2.7658	109.685	79.4118	0.2945	122.909
55				88.7097	0.2814	157.157	94.8276	9.771	185.783				88.7097	11.643	138.848	83.3333	6.61	102.212	85.9375	0.6305	106.654	91.6667	5.511	151.584	62.5	181.883	68.366							68.75	5.1072	79.564	87.3016	4.5218	148.808	91.6667	3.4766	118.925	80.8824	1.0241	124.487
56				90.3226	0.824	168.247	96.5517	13.047	191.747				90.3226	5.16	141.273	84.8485	8.259	103.651	87.5	0.1609	108.301	93.3333	6.175	166.709	63.6364	137.383	66.675							70	6.7441	78.126	88.8889	5.6483	144.573	93.3333	4.9	125.208	82.3529	1.2378	123.446
57				91.9355	0.6169	177.035	98.2759	13.265	191.585				91.9355	3.583	145.675	86.3636	9.672	102.367	89.0625	0	113.122	95	6.361	176.941	64.7727	69.489	64.058							71.25	5.7033	73.822	90.4762	6.1635	139.738	95	6.4234	129.347	83.8235	1.7907	116.584
58				93.5484	1.0722	183.604	100	11.111	180.672				93.5484	3.837	148.879	87.8788	11.873	105.646	90.625	0	118.97	96.6667	6.821	182.7	65.9091	38.152	65.477							72.5	4.0235	77.301	92.0635	6.2587	142.437	96.6667	6.7569	128.758	85.2941	2.3387	113.187
59				95.1613	1	192.669							95.1613	4.496	156.539	89.3939	13.433	112.784	92.1875	0	122.347	98.3333	8.168	189.857	67.0455	49.511	76.09							73.75	2.6673	84.886	93.6508	5.7309	151.672	98.3333	6.3883	114.08	86.7647	2.7346	106.842
60				96.7742	1	207.806							96.7742	5.064	168.805	90.9091	13.251	112.468	93.75	0	123.733	100	8.833	197.337	68.1818	89.206	84.972							75	2.3715	92.646	95.2381	4.5388	166.636	100	6	95.6567	88.2353	2.35	97.378
61				98.3871	1	226.969							98.3871	5.91	167.58	92.4242	10.956	112.437	95.3125	0.3453	121.379				69.3182	122.964	87.437							76.25	2.8098	104.651	96.8254	2.8079	181.022				89.7059	2	98.503
62				100	1	236.218							100	6.806	163.702	93.9394	8.807	114.873	96.875	1.4775	126.423				70.4545	96.124	96.394							77.5	3.53	112	98.4127	2	185.947				91.1765	1.1938	110.583
63																95.4545	7.791	120.342	98.4375	2.9678	136.962				71.5909	51.868	101.668							78.75	3.47	112.53	100	2	180.432				92.6471	1	120.111
64																96.9697	7.652	121.856	100	4.1445	135.727				72.7273	18.141	102.739							80	1.94	114.59							94.1176	1.1885	126.341
65																98.4848	11.252	139.789							73.8636	4.259	105.46							81.25	0.47	116.53							95.5882	1.8187	131.959
66																100	15.113								75	0.161	110.939							82.5	0	116.47							97.0588	2
67																									76.1364	0	116.936							83.75	0	120.77							98.5294	2.2772
68																									77.2727	0	115.794							85	0	126.59							100	2.2731
69																									78.4091	0	117.195							86.25	0.53	129.06
70																									79.5455	0	118.678							87.5	2.06	122.58
71																									80.6818	0	117.671							88.75	3.53	111.23
72																									81.8182	0.124	114.618							90	4	108.06
73																									82.9545	0.779	107.576							91.25	3.47	112.18
74																									84.0909	2.299	96.939							92.5	3	125.07
75																									85.2273	3.435	99.945							93.75	4.06	137.18
76																									86.3636	2.821	108.573							95	7.12	137.88
77																									87.5	1.783	110.608							96.25	11.12	134.94
78																									88.6364	1.027	107.624							97.5	14.06	137.18
79																									89.7727	1	104.111							98.75	13.41	145.3
80																									90.9091	1.36	101.578							100	9.88	146.82
81																									92.0455	2	102.012
82																									93.1818	2	116.984
83																									94.3182	2.324	123.633
84																									95.4545	2.978	126.37
85																									96.5909	3.633	142.127
86																									97.7273	4.308	150.463
87																									98.8636	5.719	155.066
88																									100	6.278	130.178
	0			0			0			0			0			0			0			0			0			0			0			0			0			0			0					Mean	STDDEV
	5	15.2814	140.682	5	2.2653	214.818	5	8.10967	193.247	5	7.5009	164.609	5	23.5667	191.932	5	13.388	178.139	5	2.2362	171.798	5	12.5	175.75	5	4.516	150.969	5	2	162.015	5	2.5618	170.258	5	1.44612	166.128	5	2.4932	202.886	5	5.2136	114.358	5	2.06787	170.259		FISH	7.00979	6.27285
	10	5.27345	150.869	10	2.14657	212.173	10	7.93767	226.771	10	7.944	146.666	10	7.76133	194.888	10	15.705	138.545	10	2.05867	172.09	10	18.25	171.25	10	7.237	154.836	10	2.9975	162.826	10	2.4541	166.499	10	3.04116	164.355	10	3	216.073	10	5.21453	122.182	10	2.8993	164.358			6.26135	4.73199
	15	3.9624	144.43	15	3.3826	186.127	15	10.6873	231.509	15	13.3081	136.088	15	8.60567	181.533	15	15.5037	122.792	15	1.62447	139.363	15	24.75	169	15	3.2416	163.745	15	4.17	140.625	15	3.4692	166.625	15	3.01382	154.507	15	6.72387	186.257	15	5.6381	110.097	15	10.0787	156.259			7.8773	6.02719
	20	4.3975	143.17	20	7.0246	161.524	20	7.36167	189.19	20	12.9052	121.922	20	21.9277	203.698	20	20.9492	101.85	20	1.5923	115.064	20	22.5	166.75	20	2.7755	96.2908	20	5.228	137.466	20	5.4661	144.782	20	2.4146	152.58	20	5.65093	178.755	20	7.35507	94.643	20	6.5008	139.716			8.93661	6.92334
	25	7.2167	150.848	25	4.57937	148.128	25	16.0343	134.78	25	4.47225	118.857	25	19.0097	196.711	25	22.317	88.427	25	3.2491	102.528	25	11.651	150.521	25	3.9958	66.5706	25	6.8385	115.203	25	6.30675	115.523	25	2.73336	145.28	25	2.9	160.333	25	4.90647	88.7063	25	3.93328	89.1728			8.00957	6.06357
	30	16.4843	151.176	30	4.5066	144.709	30	24.2677	103.803	30	3.54205	121.294	30	9.162	178.069	30	26.7823	98.5253	30	3.90552	116.837	30	4.02725	120.9	30	6.3704	113.594	30	8.1965	104.453	30	5.116	103.232	30	4.05436	149.595	30	1.61667	149.4	30	4.2449	95.3483	30	3.5795	124.595			8.3904	7.54565
	35	17.0117	135.504	35	2.14277	132.775	35	9.84167	105.579	35	16.9211	122.304	35	7.06233	140.073	35	17.3015	103.941	35	3.27103	110.193	35	5.434	103.404	35	6.81125	115.299	35	6.27233	103.216	35	3.53457	115.177	35	9.40386	134.485	35	2.96563	152.866	35	4.53655	112.053	35	3.4494	152.128			7.73065	5.15176
	40	5.81645	121.149	40	1	138.314	40	10.3387	113.783	40	32.0289	124.978	40	9.85533	127.292	40	4.06533	104.309	40	2.02997	90.9737	40	6.81975	103.956	40	8.9398	110.265	40	1.026	113.696	40	2.36485	138.755	40	4.38994	124.925	40	22.408	160.114	40	3.36755	102.719	40	2.89968	115.453			7.82335	8.33261
	45	4.0754	110.171	45	0.901333	127.399	45	8.92467	115.451	45	14.359	124.554	45	13.508	129.117	45	5.28933	105.396	45	1.79917	79.7233	45	10.5192	108.784	45	1.6765	95.938	45	0.1165	127.007	45	1.11015	147.731	45	1.3047	126.392	45	11.7256	178.408	45	3.50362	92.9217	45	3	100.982			5.45422	4.80197
	50	7.72965	98.1669	50	0.924075	107.838	50	11.014	108.674	50	4.877	121.447	50	14.6325	130.918	50	64.8885	101.433	50	1.50055	76.7025	50	84.1952	122.46	50	0.6206	110.735	50	0.9	130.334	50	1.168	136.239	50	8.39892	112.566	50	2.9125	167.846	50	9.09018	103.448	50	2.27385	103.805			14.3417	24.2288
	55	12.0362	85.0851	55	1.94117	112.412	55	50.0057	112.944	55	15.3505	114.101	55	19.373	132.95	55	172.426	91.9892	55	1.05305	84.6055	55	146.383	107.772	55	0	119.547	55	19.771	126.739	55	3.86975	92.552	55	8.07524	108.958	55	0.4219	164.041	55	16.8588	92.6295	55	1.09678	115.796			31.2441	51.9831
	60	13.0289	66.9753	60	1.3643	142.587	60	142.69	124.697	60	32.7789	113.397	60	87.7447	125.565	60	214.744	83.9843	60	10.4637	96.8803	60	153.773	96.5555	60	4.12325	121.991	60	107.404	116.442	60	19.4962	64.967	60	3.6863	113.854	60	0.218033	131.558	60	16.4858	67.3325	60	0.0387667	117.074			53.8693	67.2635
	65	9.38215	60.4777	65	3.90013	156.756	65	26.9343	129.95	65	33.6639	112.305	65	23.4953	105.436	65	98.138	90.3647	65	7.72573	107.221	65	114.124	93.305	65	120.742	74.2088	65	109.643	109.206	65	53.3426	64.2455	65	1.96404	111.799	65	6.54383	92.3237	65	43.1181	72.2758	65	5.1019	89.059			43.8547	43.018
	70	13.2031	70.6087	70	12.8651	142.441	70	17.745	136.856	70	62.8081	94.6674	70	3.751	98.635	70	11.7007	90.4832	70	15.9933	108.473	70	18.009	104.737	70	74.9583	78.494	70	83.5857	112.174	70	41.7267	109.525	70	3.0118	88.7296	70	72.3767	99.8367	70	63.9023	100.226	70	57.6094	57.3617			36.8831	28.1916
	75	31.6568	105.42	75	17.4215	123.939	75	24.7513	129.987	75	79.4517	89.4039	75	0.391333	112.302	75	1.96033	93.1477	75	27.78	123.108	75	3.80525	117.785	75	34.1106	103.44	75	63.16	121.241	75	16.5739	132.106	75	4.30194	81.3562	75	33.5296	131.348	75	20.5587	117.426	75	20.7699	79.0005			25.3482	21.3031
	80	20.3793	121.612	80	11.0208	135.282	80	83.624	142.648	80	55.5129	97.9934	80	0.904667	112.23	80	5.21767	96.801	80	26.8396	109.895	80	6.15125	129.718	80	0.0322	115.908	80	14.7395	130.466	80	14.6554	148.578	80	2.82426	107.283	80	24.015	148.902	80	6.51368	109.078	80	0.24485	114.927			18.1783	22.3608
	85	7.0319	121.643	85	1.37367	141.967	85	62.1767	180.367	85	22.5656	124.458	85	11.978	112.583	85	6.5735	101.303	85	5.97047	106.447	85	6.03325	127.114	85	0.8005	109.201	85	0.577	139.37	85	12.2182	133.632	85	0.482	118.99	85	6.7656	151.34	85	2.9386	105.461	85	1.35087	121.506			9.92238	15.0889
	90	7.17005	132.485	90	0.5725	147.884	90	24.1383	200.347	90	15.0758	146.134	90	17.689	133.305	90	11.6593	106.932	90	0.2638	109.359	90	6.106	130.919	90	2.0132	106.172	90	0	137.271	90	7.40385	134.459	90	2.024	119.504	90	4.39367	147.506	90	2.6224	102.181	90	2.35582	103.977			6.89918	6.96939
	95	7.7184	133.548	95	0.8377	176.295	95	6.51233	188.052	95	35.7088	141.239	95	4.19333	145.276	95	11.0047	113.259	95	0	121.683	95	6.07225	159.737	95	1.921	111.052	95	0.461	143.202	95	7.51925	130.826	95	4.33	124.074	95	6.05103	144.616	95	4.39145	120.791	95	1.12743	119.012			6.52324	8.37231
	100	6.47353	109.645	100	1	215.915	100	12.4743	188.001	100	49.277	139.396	100	5.569	164.156	100	10.452	127.329	100	2.23377	130.123	100	7.54575	186.709	100	4.5832	140.841	100	1.91433	141.432	100	8.67847	112.038	100	11.118	140.424	100	2.83668	178.509	100	6.39215	116.96	100	2.09225	131.959			8.8427	11.3517
[truncated: 5 more columns]

## Sheet: Summary
% Chromosome Length		Mean	STDDEV	SEM		Mean	STDDEV	SEM
0-5	FISH	7.00979	6.27285	1.61964	PI	171.19	23.9703	6.1891
5-10		6.26135	4.73199	1.2218		170.959	28.6118	7.38754
10-15		7.8773	6.02719	1.55622		159.264	28.9993	7.4876
15-20		8.93661	6.92334	1.7876		143.16	32.2258	8.32066
20-25		8.00957	6.06357	1.56561		124.773	33.4985	8.64927
25-30		8.3904	7.54565	1.94828		125.035	23.4422	6.05275
30-35		7.73065	5.15176	1.33018		122.6	16.853	4.35143
35-40		7.82335	8.33261	2.15147		119.379	16.7981	4.33725
40-45		5.45422	4.80197	1.23986		117.998	23.2687	6.00795
45-50		14.3417	24.2288	6.25585		115.508	20.2222	5.22134
50-55		31.2441	51.9831	13.422		110.808	20.1258	5.19647
55-60		53.8693	67.2635	17.3674		105.591	24.0615	6.21265
60-65		43.8547	43.018	11.1072		97.9288	24.6326	6.36011
65-70		36.8831	28.1916	7.27903		99.5499	21.4197	5.53056
70-75		25.3482	21.3031	5.50042		110.734	17.3262	4.4736
75-80		18.1783	22.3608	5.77355		121.421	16.4989	4.26001
80-85		9.92238	15.0889	3.89594		126.359	20.0933	5.18808
85-90		6.89918	6.96939	1.79949		130.562	24.5064	6.32753
90-95		6.52324	8.37231	2.16172		138.177	21.7631	5.61921
95-100		8.8427	11.3517	2.93099		148.229	30.3972	7.84853
