# Supplementary material for: Large domains of heterochromatin direct the formation of short mitotic chromosome loops
Source: eLife. 2020 Sep 11;9:e57212. doi: 10.7554/eLife.57212 (PMC7515631; doi:10.7554/eLife.57212)
Supplement: Figure 3—source data 4. [file elife-57212-fig3-data4.xlsx]

## Sheet: NP-F1 H3K9me3
		%IP 1 (ChIP 31)	%IP 2 (ChIP 32)	%IP 3 (ChIP33)	Mean %IP	STDEV	SEM		% Sat 1	% Sat 2	% Sat 3	Mean %Sat	STDEV	SEM
Rad3	No Antibody	0.00140344	0.0087223	0.0200849	0.0100702	0.007686	0.00443751		0.00703197	0.027321	0.0333223	0.0225584	0.0112489	0.00649456
	H3K9me3	0.11981	0.354129	0.273922	0.249287	0.0972338	0.0561379		0.600308	1.10925	0.454457	0.721337	0.280682	0.162052
Mac1	No Antibody	0.00689461	0.00749386	0.0122033	0.00886393	0.00237395	0.0013706		0.0345456	0.0234732	0.0202462	0.0260883	0.0061236	0.00353546
	H3K9me3	0.163162	0.271119	0.365047	0.266443	0.0824855	0.047623		0.817528	0.849231	0.605639	0.757466	0.108135	0.062432
ChrI_Inter	No Antibody	0.000591012	0.00803258	0.0179585	0.00886069	0.00711438	0.00410749		0.00296128	0.0251606	0.0297944	0.0193054	0.0117109	0.00676127
	H3K9me3	0.0942008	0.232942	0.331879	0.219674	0.0974842	0.0562825		0.471996	0.72965	0.550611	0.584085	0.107817	0.0622484
Pol5	No Antibody	0.00421075	0.0150902	0.017395	0.012232	0.00574939	0.00331941		0.021098	0.0472674	0.0288595	0.0324083	0.0109744	0.00633605
	H3K9me3	0.164617	0.39507	0.317256	0.292314	0.0957211	0.0552646		0.824816	1.23749	0.52635	0.862885	0.291566	0.168336
Pcn1	No Antibody	0.00171286	0.00394331	0.0140966	0.00658426	0.00538951	0.00311163		0.00858233	0.0123517	0.0233873	0.0147738	0.00628205	0.00362694
	H3K9me3	0.107353	0.22681	0.329368	0.221177	0.090725	0.0523801		0.537893	0.710443	0.546445	0.59826	0.0794021	0.0458428
Ura4	No Antibody	0.00434148	0.00387803	0.0107464	0.00632196	0.00313425	0.00180956		0.0217531	0.0121472	0.017829	0.0172431	0.00394339	0.00227672
	H3K9me3	0.142711	0.315223	0.381983	0.279972	0.100812	0.058204		0.715058	0.98738	0.633737	0.778725	0.15123	0.0873129
Mpg1	No Antibody	0.00213452	0.0071102	0.0181222	0.00912231	0.00668022	0.00385683		0.0106951	0.0222714	0.030066	0.0210108	0.00795824	0.00459469
	H3K9me3	0.167285	0.505971	0.46143	0.378228	0.150264	0.086755		0.838183	1.58486	0.765544	1.06286	0.370299	0.213792
ChrI_LTR	No Antibody	0.00190043	0.00641316	0.0124528	0.00692214	0.004323	0.00249589		0.00952218	0.0200881	0.0206601	0.0167568	0.00512098	0.0029566
	H3K9me3	0.130632	0.375359	0.587457	0.364482	0.186656	0.107766		0.654533	1.17574	0.974632	0.93497	0.214624	0.123913
NeoP	No Antibody	0.00031164	0.00361317	0.00599234	0.00330572	0.0023293	0.00134482		0.00156148	0.0113176	0.00994172	0.00760693	0.00431153	0.00248926
	H3K9me3	0.0379821	0.0785082	0.0581989	0.0582297	0.0165447	0.00955209		0.19031	0.245913	0.0965561	0.177593	0.0616341	0.0355845
NeoS	No Antibody	0.00299703	0.0322846	0.137556	0.0576124	0.057779	0.0333587		0.0150167	0.101126	0.228214	0.114786	0.0875719	0.0505597
	H3K9me3	0.0406005	0.0784141	0.386799	0.168604	0.155057	0.0895222		0.20343	0.245618	0.641726	0.363592	0.197424	0.113983
mAct	No Antibody	0.00101361	0.00502532	0.00473966	0.00359286	0.00182754	0.00105513		0.0050787	0.0157409	0.00786344	0.00956102	0.00451532	0.00260692
	H3K9me3	0.0398288	0.067496	0.0619445	0.0564231	0.0119508	0.00689979		0.199563	0.211419	0.10277	0.171251	0.0486644	0.0280964
Hoxc8	No Antibody	0.000236921	0.0104157	0.00436899	0.00500719	0.00417989	0.00241326		0.0011871	0.0326252	0.00724847	0.0136869	0.0136181	0.00786242
	H3K9me3	0.0966042	0.13033	0.109706	0.112213	0.0138821	0.00801483		0.484038	0.408235	0.182011	0.358094	0.128298	0.074073
mSat	No Antibody	0.000515507	0.00569213	0.0063086	0.00417208	0.00259781	0.00149984		0.00258296	0.0178296	0.0104664	0.010293	0.00622561	0.00359436
	H3K9me3	0.19958	0.319252	0.602747	0.37386	0.169061	0.0976074		1	1	1	1	0	0
