# Supplementary material for: Large domains of heterochromatin direct the formation of short mitotic chromosome loops
Source: eLife. 2020 Sep 11;9:e57212. doi: 10.7554/eLife.57212 (PMC7515631; doi:10.7554/eLife.57212)
Supplement: Figure 3—source data 5. [file elife-57212-fig3-data5.xlsx]

## Sheet: NP-F2 H3K9me3
H3K9me3											No Antibody
% IP							Mean	STDEV	SEM		% IP							Mean	STDEV	SEM
	ChIP 45	ChIP 46	ChIP47	ChIP 46	ChIP47							ChIP 45	ChIP 46	ChIP47	ChIP 46	ChIP47
Rad3	0.363452	0.56041	0.737008	0.379942	0.6099		0.530142	0.141716	0.0633771		Rad3	0.00724687	0.0130864	0.00983432	0.0120714	0.00271074		0.00898994	0.00372708	0.0016668
Mac1	0.64423	0.873936	1.07182	0.448972	0.934984		0.794789	0.221325	0.0989795		Mac1	0.00822015	0.00848617	0.00729834	0.00586135	0.00308985		0.00659117	0.00197669	0.000884003
ChrI_inter	0.446044	0.627471	0.755224	0.294438	0.585427		0.541721	0.158209	0.0707531		ChrI_inter	0.0312085	0.0055917	0.0048767	0.00916367	0.000700308		0.0103082	0.0107906	0.00482572
Hut1	0.728377	0.669201	1.07853	0.423827	0.716899		0.723367	0.209221	0.0935664		Hut1	0.00641963	0.0211905	0.0175701	0.0272655	0.0126595		0.017021	0.00712807	0.00318777
Pol5	0.474058	0.675633	0.809863	0.341203	0.675965		0.595344	0.16629	0.0743673		Pol5	0.00907237	0.0129083	0.0151312	0.0184255	0.00470731		0.012049	0.0047678	0.00213222
Pcn1	0.285125	0.38037	0.508433	0.125613	0.183729		0.296654	0.137112	0.0613183		Pcn1	0.00205523	0.00115465	0.00235672	0.0103946	0.00324886		0.00384202	0.00334393	0.00149545
Ura4	0.143127	0.225146	0.232934	0.131562	0.181225		0.182799	0.0412515	0.0184482		Ura4	0.0163694	0.00396519	0.00267768	0.0475222	0.000617512		0.0142304	0.0175332	0.00784109
LTR1	0.426213	0.594304	0.786166	0.296677	0.600021		0.540676	0.166913	0.0746459		LTR1	0.00737003	0.00616653	0.00411495	0.0102538	0.00613477		0.00680802	0.00201527	0.000901258
LTR2	0.575987	0.529739	0.894549	0.333876	0.628686		0.592567	0.18091	0.0809052		LTR2	0.0244736	0.00527677	0.00388009	0.0106562	0.00107502		0.00907236	0.00830701	0.00371501
NeoP	0.0574514	0.119127	0.0760827	0.0610346	0.0910226		0.0809436	0.0225008	0.0100627		NeoP	0.000535323	0.00070804	0.000894262	0.00091414	0.000955421		0.000801437	0.000157841	7.05888e-05
mAct	0.101487	0.189781	0.177106	0.0792793	0.12562		0.134654	0.042636	0.0190674		mAct	0.00169528	0.00311041	0.00430848	0.00237704	0.0017401		0.00264626	0.000977382	0.000437099
Hoxc8	0.30284	0.472935	0.549398	0.315057	0.396		0.407246	0.0938598	0.0419754		Hoxc8	0.00256648	0.00115706	0.00437021	0.000745144	0.000443127		0.0018564	0.00145222	0.000649454
mSat	0.875578	1.14225	1.57672	0.636335	1.80942		1.20806	0.433426	0.193834		mSat	0.000721193	0.000166842	0.000416093	0.000288243	0.000324641		0.000383403	0.000186857	8.3565e-05
% Sat							Mean	STDEV	SEM		% Sat							Mean	STDEV	SEM
	ChIP 45	ChIP 46	ChIP47	ChIP 46	ChIP47							ChIP 45	ChIP 46	ChIP47	ChIP 46	ChIP47
Rad3	0.415099	0.49062	0.467432	0.597079	0.337069		0.46146	0.0859081	0.0384193		Rad3	0.00827666	0.0114567	0.00623721	0.0189702	0.00149813		0.00928777	0.00582168	0.00260354
Mac1	0.735777	0.765102	0.679781	0.705559	0.516731		0.68059	0.0867894	0.0388134		Mac1	0.00938825	0.00742936	0.00462882	0.0092111	0.00170765		0.00647303	0.00293326	0.00131179
ChrI_inter	0.509427	0.549331	0.478985	0.462709	0.323544		0.464799	0.0765454	0.0342322		ChrI_inter	0.0356433	0.00489535	0.00309294	0.0144007	0.000387034		0.0116839	0.0128759	0.00575827
Hut1	0.831881	0.585864	0.684036	0.666043	0.396203		0.632805	0.142509	0.0637321		Hut1	0.00733188	0.0185516	0.0111435	0.0428476	0.00699642		0.0173742	0.0133989	0.00599216
Pol5	0.541423	0.591495	0.513638	0.5362	0.37358		0.511267	0.0733905	0.0328212		Pol5	0.0103616	0.0113008	0.00959666	0.0289557	0.00260155		0.0125633	0.00875431	0.00391505
Pcn1	0.325641	0.333001	0.322463	0.197401	0.10154		0.256009	0.0921824	0.0412252		Pcn1	0.00234728	0.00101086	0.0014947	0.0163352	0.00179552		0.00459671	0.00588522	0.00263195
Ura4	0.163466	0.197108	0.147734	0.206749	0.100156		0.163042	0.038105	0.0170411		Ura4	0.0186955	0.0034714	0.00169826	0.074681	0.000341276		0.0197775	0.028235	0.0126271
LTR1	0.486779	0.520294	0.498609	0.466228	0.331609		0.460704	0.0668786	0.029909		LTR1	0.00841733	0.0053986	0.00260982	0.0161138	0.00339046		0.00718601	0.00489417	0.00218874
LTR2	0.657836	0.463769	0.567349	0.524685	0.347451		0.512218	0.103822	0.0464305		LTR2	0.0279514	0.00461964	0.00246087	0.0167463	0.000594124		0.0104745	0.0104009	0.00465144
NeoP	0.0656154	0.104292	0.0482538	0.0959157	0.0503048		0.0728763	0.0231785	0.0103657		NeoP	0.000611393	0.000619866	0.000567167	0.00143657	0.000528025		0.000752604	0.000343567	0.000153648
mAct	0.115908	0.166147	0.112326	0.124587	0.0694252		0.117679	0.030845	0.0137943		mAct	0.00193618	0.00272306	0.00273256	0.00373551	0.000961689		0.0024178	0.000925292	0.000413803
Hoxc8	0.345874	0.41404	0.348444	0.495111	0.218854		0.364465	0.0909185	0.04066		Hoxc8	0.00293118	0.00101297	0.00277172	0.00117099	0.0002449		0.00162635	0.00104942	0.000469316
mSat	1	1	1	1	1		1	0	0		mSat	0.000823677	0.000146065	0.000263898	0.000452974	0.000179417		0.000373206	0.000249151	0.000111424
