# Supplementary material for: Large domains of heterochromatin direct the formation of short mitotic chromosome loops
Source: eLife. 2020 Sep 11;9:e57212. doi: 10.7554/eLife.57212 (PMC7515631; doi:10.7554/eLife.57212)
Supplement: Figure 3—source data 6. [file elife-57212-fig3-data6.xlsx]

## Sheet: HeP-F3 H3K9me3
HeP3		%IP 1 (ChIP 36)	%IP 2 (ChIP 42)	Mean %IP	STDEV	SEM		% Sat 1	% Sat 2	Mean %Sat	STDEV	SEM
Rad3	No Antibody	0.0579337	0.0537098	0.0558218	0.00211198	0.00149339		0.206056	0.00133043	0.103693	0.102363	0.0723816
	H3K9me3	0.46572	41.7897	21.1277	20.662	14.6102		1.65646	1.03516	1.34581	0.310647	0.219661
Mac1	No Antibody	0.0549956	0.137192	0.0960936	0.041098	0.0290607		0.195606	0.00339834	0.0995022	0.0961039	0.0679557
	H3K9me3	0.635788	63.4501	32.043	31.4072	22.2082		2.26135	1.57171	1.91653	0.344819	0.243824
Pol5	No Antibody	0.0753046	0.223916	0.14961	0.0743057	0.0525421		0.26784	0.00554657	0.136694	0.131147	0.0927349
	H3K9me3	0.556531	44.3655	22.461	21.9045	15.4888		1.97945	1.09897	1.53921	0.440241	0.311297
Ura4	No Antibody	0.0623456	0.335372	0.198859	0.136513	0.0965295		0.221748	0.00830742	0.115028	0.106721	0.0754628
	H3K9me3	0.444554	36.2074	18.326	17.8814	12.6441		1.58117	0.896884	1.23903	0.342143	0.241932
Omh3	No Antibody	0.0533118	0.124727	0.0890196	0.0357078	0.0252492		0.189617	0.00308959	0.0963535	0.0932639	0.0659475
	H3K9me3	0.449835	48.4193	24.4346	23.9847	16.9598		1.59995	1.19938	1.39967	0.200286	0.141624
Mpg1	No Antibody	0.0630355	0.0613879	0.0622117	0.000823791	0.000582508		0.224202	0.00152063	0.112861	0.111341	0.0787298
	H3K9me3	0.650403	54.2545	27.4525	26.8021	18.9519		2.31333	1.34393	1.82863	0.484701	0.342735
ChrI_LTR	No Antibody	0.0507924	0.128421	0.0896066	0.0388142	0.0274458		0.180656	0.00318108	0.0919187	0.0887377	0.062747
	H3K9me3	0.34577	46.3546	23.3502	23.0044	16.2666		1.22982	1.14824	1.18903	0.0407898	0.0288428
ChrIII_LTR	No Antibody	0.0748426	0.0330875	0.053965	0.0208775	0.0147627		0.266197	0.000819602	0.133508	0.132689	0.0938251
	H3K9me3	0.527408	53.9626	27.245	26.7176	18.8922		1.87586	1.33669	1.60628	0.269584	0.190625
NeoP	No Antibody	0.0407693	0.0489535	0.0448614	0.00409209	0.00289355		0.145007	0.00121261	0.0731096	0.071897	0.0508389
	H3K9me3	0.261611	24.9258	12.5937	12.3321	8.72012		0.930487	0.617432	0.77396	0.156528	0.110682
GAPDH	No Antibody	0.0398532	0.0379885	0.0389208	0.00093236	0.000659278		0.141748	0.000941003	0.0713446	0.0704036	0.0497829
	H3K9me3	0.0555927	1.35246	0.704028	0.648435	0.458513		0.19773	0.0335015	0.115616	0.0821142	0.0580635
D5Z1	No Antibody	0.0234025	0.0234651	0.0234338	3.13185e-05	2.21455e-05		0.083237	0.000581249	0.0419091	0.0413279	0.0292232
	H3K9me3	0.219506	41.1482	20.6838	20.4643	14.4705		0.780729	1.01927	0.9	0.119271	0.0843373
D7Z1	No Antibody	0.0418993	0.0326734	0.0372864	0.00461296	0.00326186		0.149026	0.000809345	0.0749176	0.0741083	0.0524025
	H3K9me3	0.281155	40.3702	20.3257	20.0445	14.1736		1	1	1	0	0
