# Supplementary material for: Large domains of heterochromatin direct the formation of short mitotic chromosome loops
Source: eLife. 2020 Sep 11;9:e57212. doi: 10.7554/eLife.57212 (PMC7515631; doi:10.7554/eLife.57212)
Supplement: Figure 4—source data 1. [file elife-57212-fig4-data1.xlsx]

## Sheet: All
1	FISH		PI	2	FISH		PI	3	FISH		PI	4	FISH		PI	5	FISH		PI	6	FISH		PI	8	FISH		PI	9	FISH		PI	10	FISH		PI	11	FISH		PI	13	FISH		PI	14	FISH		PI	15	FISH
X	Y	X	Y	X	Y	X	Y	X	Y	X	Y	X	Y	X	Y	X	Y	X	Y	X	Y	X	Y	X	Y	X	Y	X	Y	X	Y	X	Y	X	Y	X	Y	X	Y	X	Y	X	Y	X	Y	X	Y	X	Y
0	0	0	132	0	0	0	164	0	0	0	134	0	0	0	166	0	1	0	107	0	1	0	185	0	0	0	132	0	0	0	186	0	1	0	158	0	0	0	143	0	0	0	199	0	2	0	137	0	1
1	0	1	144.491	1	0	1	176.69	1	0	1	140.917	1	0	1	180.435	1	1	1	110.769	1	1	1	200.54	1	0	1	135.916	1	0	1	190.528	1	1	1	158.164	1	0	1	145.48	1	0	1	197.8	1	2.942	1	122.217	1	1.614
2	0	2	157.133	2	0	2	191.717	2	0	2	136.682	2	0	2	187.799	2	0.832	2	108.76	2	1	2	198.444	2	0	2	140.546	2	0	2	198.891	2	1	2	172.588	2	0	2	152.144	2	0	2	181.951	2	3.789	2	109.373	2	2.552
3	0	3	168.991	3	0	3	188.115	3	0.207	3	131.651	3	0	3	185.577	3	0	3	100.347	3	1	3	187.944	3	0	3	144.692	3	0	3	200.632	3	1	3	189.339	3	0	3	152.997	3	0	3	170.843	3	4.791	3	91.7684	3	3.316
4	0	4	177.126	4	0	4	185.056	4	0	4	129.673	4	0	4	180.77	4	0	4	92.4455	4	1	4	171.773	4	0	4	133.322	4	0	4	199.273	4	0.054	4	204.439	4	0	4	150.07	4	0	4	164.014	4	4.422	4	75.8136	4	3.983
5	0	5	173.536	5	0	5	178.84	5	0	5	125.609	5	0	5	176.246	5	0	5	84.608	5	1	5	154.408	5	0	5	118.282	5	0	5	181.877	5	0	5	211.077	5	0	5	147.569	5	0	5	153.878	5	3.056	5	63.8359	5	6.365
6	0	6	167.073	6	0	6	171.324	6	0	6	119.927	6	0	6	170.125	6	0	6	78.3804	6	1	6	138.824	6	0	6	103.886	6	0	6	158.543	6	0	6	209.155	6	0	6	131.299	6	0	6	137.785	6	1.267	6	54.1204	6	13.587
7	0	7	154.037	7	0	7	152.984	7	0	7	118.233	7	0	7	162.646	7	0	7	71.8795	7	0.286	7	123.159	7	0	7	87.533	7	0	7	138.079	7	0	7	206.672	7	0	7	106.516	7	0	7	120.66	7	0.021	7	48.115	7	21.136
8	0	8	134.622	8	0	8	129.518	8	0	8	113.958	8	0	8	156.726	8	0	8	64.4525	8	0	8	107.355	8	0.333	8	73.614	8	0	8	114.909	8	0	8	200.713	8	0	8	90.92	8	0	8	106.815	8	0.051	8	46.5543	8	22.244
9	0	9	116.142	9	0	9	106.804	9	0	9	107.952	9	0	9	153.907	9	0	9	55.8743	9	0	9	91.393	9	1.704	9	62.421	9	0	9	90.375	9	0	9	184.515	9	0	9	76.973	9	0	9	96.57	9	0.379	9	47.535	9	12.866
10	0	10	100.447	10	0	10	86.887	10	0	10	101.061	10	0	10	143.721	10	0	10	50.0835	10	0	10	76.99	10	3.421	10	55.728	10	0	10	75.856	10	0	10	165.454	10	4.17	10	70.943	10	0	10	86.745	10	1.318	10	47.09	10	3.543
11	0	11	84.813	11	0	11	73.962	11	0	11	93.7902	11	0	11	130.993	11	0	11	48.393	11	0	11	62.065	11	6.36	11	51.219	11	0	11	66.274	11	0	11	148.085	11	23.232	11	67.611	11	0	11	76.436	11	1.736	11	43.9819	11	0.474
12	0	12	72.772	12	0	12	68.203	12	0	12	84.3782	12	0.235	12	119.928	12	0	12	48.2065	12	0	12	52.73	12	13.356	12	46.322	12	0	12	59.188	12	0.066	12	131.549	12	57.768	12	64.745	12	0	12	72.434	12	0.824	12	37.8275	12	0.367
13	0	13	62.698	13	0	13	64.353	13	0	13	84.8204	13	2.954	13	111.988	13	0	13	45.8947	13	0	13	45.037	13	29.666	13	43.751	13	0	13	57.951	13	0.706	13	117.965	13	99.504	13	64.489	13	0	13	68.516	13	0	13	32.4747	13	2.274
14	0	14	60.29	14	3.013	14	67.804	14	0	14	81.506	14	13.95	14	105.372	14	0	14	45.8598	14	0	14	42.638	14	58.84	14	39.52	14	0	14	60.919	14	1.686	14	109.723	14	137.509	14	65.368	14	2.44	14	61.12	14	0	14	31.4619	14	11.05
15	0	15	63.58	15	14.972	15	71.817	15	0	15	77.2203	15	33.025	15	102.723	15	0.824	15	48.6186	15	0	15	43.289	15	95.18	15	36.76	15	2.129	15	65.883	15	3.485	15	103.872	15	155.309	15	61.619	15	18.03	15	56.78	15	0	15	31.2383	15	35.54
16	0	16	68.406	16	41.858	16	76.943	16	0.68	16	72.7668	16	57.348	16	102.444	16	5.478	16	51.3046	16	0.13	16	44.593	16	129.22	16	37.86	16	16.606	16	67.015	16	5.221	16	102.352	16	169.114	16	56.66	16	58.72	16	54.78	16	0.738	16	31.3952	16	86.315
17	0	17	74.116	17	86.681	17	75.553	17	4.387	17	69.1068	17	87.57	17	98.837	17	21.737	17	52.2204	17	5.13	17	45.933	17	140.38	17	42.72	17	57.241	17	67.399	17	7.177	17	104.932	17	171.369	17	49.676	17	122.92	17	50.95	17	6.705	17	31.5683	17	135.776
18	0.577	18	73.511	18	128.095	18	69.429	18	9.789	18	68	18	116.851	18	93.524	18	40.002	18	51.6194	18	25.693	18	49.426	18	123.26	18	51.2	18	121.674	18	67.961	18	11.743	18	110.091	18	175.247	18	46.488	18	183.33	18	48.39	18	27.728	18	31.9993	18	162.071
19	1.99	19	66.051	19	146.013	19	63.559	19	21.382	19	71.4338	19	141.713	19	86.752	19	52.236	19	50.1538	19	77.398	19	52.711	19	85.1	19	64.3	19	176.733	19	65.09	19	21.101	19	122.71	19	191.324	19	47.166	19	194.24	19	46.17	19	75.305	19	30.7611	19	160.005
20	4.042	20	59.78	20	163.595	20	56.721	20	44.118	20	74.6171	20	159.292	20	79.345	20	57.813	20	47.9856	20	164.677	20	55.821	20	43.629	20	75.985	20	197.883	20	56.495	20	38	20	129	20	196.436	20	48.924	20	153.23	20	43.78	20	144.572	20	28.0981	20	146.198
21	6.68	21	58.16	21	166.403	21	49.366	21	72.858	21	77.5297	21	169.753	21	71.557	21	60.881	21	44.96	21	233.926	21	54.505	21	17.008	21	79.561	21	189.54	21	47.596	21	52.25	21	126.426	21	178.895	21	48.791	21	96.84	21	44.83	21	195.971	21	27.4413	21	137.331
22	9.493	22	59.841	22	158.738	22	46.909	22	105.099	22	76.4782	22	167.701	22	66.948	22	69.719	22	42.3764	22	237.764	22	50.063	22	4.664	22	77.384	22	165.645	22	40.529	22	63.234	22	117.872	22	145.368	22	48.338	22	56.09	22	48.44	22	201.204	22	27.944	22	132.781
23	15.649	23	63.238	23	138.838	23	45.969	23	137.368	23	69.3668	23	149.767	23	61.556	23	89.543	23	39.8719	23	208.548	23	44.334	23	0.536	23	73.914	23	131.198	23	35.569	23	79.814	23	108.921	23	103.007	23	48.207	23	33.63	23	53.66	23	165.595	23	27.943	23	128.493
24	25.068	24	66.143	24	111.013	24	42.885	24	164.723	24	63.1621	24	121.588	24	59.903	24	110.991	24	36.6622	24	163.669	24	38.559	24	0	24	72.857	24	102.511	24	34.125	24	102.239	24	99.378	24	70.981	24	47.962	24	21.51	24	62.71	24	117.94	24	27.3554	24	107.164
25	33.363	25	70.152	25	86.554	25	39.706	25	175.267	25	62.0223	25	90.262	25	60.63	25	113.924	25	34.4448	25	134.832	25	34.133	25	0	25	78.23	25	88.134	25	34.444	25	119.348	25	92.206	25	57.032	25	49.903	25	16.17	25	70.05	25	84.316	25	26.4192	25	77.183
26	51.485	26	79.008	26	56.582	26	35.906	26	160.455	26	60.2729	26	74.078	26	60.475	26	90.569	26	34	26	119.28	26	31.772	26	0	26	89.434	26	89.072	26	38.679	26	111.843	26	89.235	26	53.279	26	54.024	26	14.39	26	73.22	26	72.115	26	26.2454	26	43.631
27	80.555	27	81.243	27	27.994	27	36.222	27	131.073	27	56.4374	27	61.081	27	58.059	27	57.617	27	34.2514	27	103.852	27	32.128	27	0	27	100.564	27	108.247	27	45.49	27	93.547	27	85.71	27	49.559	27	63.283	27	10.95	27	75.83	27	77.146	27	29.1439	27	22.491
28	109.05	28	73.922	28	10.909	28	39.481	28	96.473	28	52.5467	28	52.305	28	53.25	28	35.519	28	35.9109	28	82.355	28	35.292	28	0	28	104.146	28	129.19	28	53.356	28	62.081	28	81.35	28	40.001	28	78.7	28	5.95	28	78.83	28	91.011	28	33.095	28	8.902
29	126.164	29	68.633	29	3.485	29	46.625	29	78.451	29	49.8271	29	47.722	29	47.302	29	34.754	29	40.4624	29	58.451	29	43.373	29	0	29	103.134	29	125.443	29	62.937	29	45.536	29	74.23	29	22.085	29	91.462	29	2.17	29	78.78	29	101.856	29	35.968	29	3.915
30	136.908	30	62.949	30	0.633	30	59.783	30	82.271	30	48.3275	30	44.533	30	47.15	30	48.947	30	46.3933	30	37.332	30	54.177	30	0	30	98.145	30	93.124	30	71.392	30	41.213	30	65.098	30	6.725	30	100.957	30	0.39	30	75.56	30	100.202	30	43.0397	30	2.062
31	137.219	31	53.354	31	0	31	75.834	31	97.867	31	50.488	31	49.308	31	52.483	31	62.28	31	51.8822	31	22.768	31	65.396	31	0	31	87.179	31	53.78	31	80.829	31	52.367	31	57.585	31	0.705	31	102.101	31	0	31	72.17	31	85.322	31	51.8741	31	1.109
32	126.835	32	44.233	32	0	32	87.119	32	108.49	32	57.6201	32	55.159	32	59.183	32	60.357	32	57.1029	32	10.526	32	75.433	32	0	32	76.033	32	27.489	32	79.485	32	69.231	32	51.442	32	0	32	96.101	32	0	32	69.78	32	66.91	32	58.9633	32	0.479
33	100.559	33	38.061	33	0	33	87.05	33	98.069	33	66.2203	33	48.701	33	65.982	33	36.185	33	57.1294	33	2.861	33	81.488	33	0.239	33	63.742	33	12.402	33	72.674	33	85.999	33	48.102	33	0	33	89.309	33	0	33	69.61	33	45.132	33	61.3287	33	0
34	68.972	34	36.576	34	0	34	82.298	34	69.808	34	75.7831	34	32.644	34	70.267	34	13.154	34	55.5864	34	0	34	80.992	34	2.101	34	55.743	34	4.45	34	66.429	34	98.968	34	48.424	34	0.43	34	85.442	34	0	34	71.22	34	23.614	34	59.7026	34	0
35	45.853	35	41.01	35	0	35	75.833	35	39.248	35	87.1757	35	15.211	35	71.733	35	1.702	35	53.7871	35	0	35	81.309	35	4.843	35	54.804	35	0.754	35	65.046	35	97.852	35	51.391	35	4.526	35	84.921	35	0	35	73.22	35	8.529	35	57.9124	35	0
36	31.294	36	52.895	36	0	36	68.281	36	18.789	36	91.3542	36	5.055	36	72.11	36	0.084	36	52.9411	36	0	36	78.13	36	6.97	36	54.266	36	0.052	36	66.372	36	84.674	36	59.501	36	12.251	36	85.686	36	0	36	72.78	36	1.259	36	53.4834	36	0
37	43.71	37	70.282	37	0	37	63.772	37	7.647	37	87.0135	37	0.939	37	77.427	37	0	37	53.1418	37	0.017	37	71.956	37	6.361	37	50.618	37	0	37	65.81	37	61.057	37	68.814	37	22.607	37	90.353	37	0	37	70.78	37	0.026	37	49.3054	37	0
38	67.872	38	87.748	38	0	38	60.39	38	2.196	38	83.6181	38	0	38	82.091	38	0	38	54.9311	38	0.701	38	62.01	38	4.47	38	44.47	38	0	38	60.965	38	37.874	38	76.014	38	33.531	38	95.641	38	0.61	38	71.22	38	0	38	48.2548	38	0.065
39	81.821	39	98.984	39	0	39	57.331	39	0	39	80.6482	39	0	39	90.04	39	0	39	56.0529	39	2.088	39	61.384	39	3.319	39	40.171	39	0	39	55.787	39	17.406	39	83.895	39	35.59	39	96.742	39	1.61	39	72	39	0	39	49.3183	39	0.874
40	67.134	40	105.298	40	0	40	55.04	40	0	40	82.2774	40	0	40	95.251	40	0	40	56.2901	40	3.251	40	62.938					40	0.286	40	52.791	40	5.135	40	89.435	40	29.552	40	94.487	40	2	40	71.39	40	0	40	54.9788	40	2.088
41	49.495	41	109.709	41	0	41	52.676	41	0	41	80.6451	41	0	41	90.764	41	0	41	56.8842	41	3.958	41	64.797					41	0.265	41	51.905	41	0.826	41	98.095	41	19.2	41	88.4	41	1.39	41	71	41	0	41	61.3756	41	3.488
42	30.877	42	106.419	42	0	42	53.125	42	0	42	85.9799	42	0	42	81.578	42	0	42	53.9751	42	2.447	42	65.885					42	0.033	42	53.598	42	0	42	110.174	42	9	42	83.8	42	0.39	42	69.17	42	0	42	65.4929	42	3.544
43	13.169	43	92.932	43	0	43	57.673	43	0	43	90.3808	43	0	43	72.886	43	0.041	43	50.4793	43	1.766	43	68.446					43	0	43	55.545	43	0	43	113.562	43	3	43	79	43	0	43	66.78	43	0	43	66.3264	43	2.92
44	3.599	44	82.89	44	0	44	64.437	44	0	44	88.0663	44	0	44	65.262	44	0.817	44	48.9933	44	1.92	44	68.834					44	2.414	44	57.602	44	0	44	111.837	44	0.4	44	76.4	44	0	44	69.05	44	0	44	64.9078	44	2.464
45	0.581	45	75.112	45	0.032	45	71.612	45	0	45	86.0425	45	1.092	45	61.804	45	3.002	45	50.281	45	1.213	45	66.808					45	7.612	45	57.48	45	0	45	106.516	45	2.4	45	76	45	1.22	45	75.27	45	0	45	60.9513	45	2.128
46	0	46	72.692	46	0.157	46	72.14	46	0	46	87.885	46	2.297	46	62.355	46	6.502	46	51.3155	46	1	46	65.256					46	11.077	46	57.848	46	0	46	102.376	46	7	46	74.4	46	3.22	46	79.22	46	0	46	50.5587	46	1.631
47	0	47	72.847	47	1.203	47	64.811	47	0	47	91.394	47	3.555	47	68.842	47	10.947	47	47.9987	47	1.201	47	64.718					47	9.066	47	58	47	0	47	95.911	47	12	47	74	47	5.22	47	79.39	47	0	47	46.2678	47	1.477
48	0	48	74.846	48	1.663	48	55.516	48	0	48	96.8098	48	3.556	48	71.603	48	11.694	48	46.3739	48	1.908	48	62.443					48	4.85	48	57.854	48	0	48	88.238	48	14.6	48	72.4	48	6	48	77.17	48	0.571	48	45.1588	48	1
49	0	49	72.272	49	1.303	49	49.683	49	0.41	49	100.073	49	2.627	49	73.561	49	7.645	49	46.1317	49	2.615	49	60.391					49	2.367	49	59.458	49	0	49	84.641	49	12.6	49	71.2	49	5.39	49	82.1	49	1.115	49	44.9684	49	1
50	0	50	66.364	50	1	50	46.851	50	0.893	50	101.874	50	1.822	50	75.033	50	4.141	50	46.804	50	3.437	50	58.459					50	1.746	50	62.463	50	0	50	83.021	50	9.6	50	67	50	3.78	50	85.39	50	2.497	50	46.6069	50	0.451
51	0	51	60.965	51	0.474	51	47.617	51	1.538	51	104.585	51	1.017	51	76.498	51	1.992	51	50.8443	51	2.999	51	57.798					51	1.733	51	66.844	51	0	51	84.993					51	2.39	51	78.9	51	3.412	51	50.3041	51	0.369
52	0	52	56.286	52	0	52	51.527	52	1.627	52	101.712	52	1	52	72.072	52	0.792	52	55.9488	52	2.458	52	55.014					52	1.865	52	69.922	52	0	52	83.269					52	1.39	52	65.24	52	4.64	52	53.1721	52	0.464
53	0	53	50.645	53	0.299	53	57.283	53	1.156	53	94.9159	53	1	53	76.706	53	0.512	53	59.9995	53	1.556	53	53.276					53	2.194	53	67.753	53	0	53	82.914									53	6.066	53	55.5674	53	0.814
54	0	54	44.337	54	1.37	54	63.996	54	0.645	54	91.8828	54	1	54	85.148	54	1.112	54	61.7682	54	1	54	50.512					54	2.64	54	61.398	54	0	54	83.876									54	6.575	54	57.0725	54	0.642
55	0	55	39.676	55	2.744	55	63.017	55	0.211	55	91.3389	55	1	55	91.021	55	1.897	55	61.2213	55	1	55	50.488					55	3.028	55	55.534	55	0	55	85.02									55	11.999	55	59.0487	55	1.414
56	0	56	36.18	56	4.942	56	62.068	56	0	56	91.7561	56	1	56	90.985	56	2.124	56	56.0449	56	0.754	56	50.884					56	1.725	56	50.454	56	0	56	83.905									56	13.962	56	58.0014	56	3.255
57	0	57	35.506	57	4.714	57	60.767	57	0.3	57	94.8527	57	1	57	88.74					57	1	57	51.382					57	0.432	57	50.239	57	0	57	82.918									57	10.116	57	58.6776	57	6.427
58	0	58	36.253	58	3.215	58	55.233	58	1	58	100.052	58	1.702	58	86.087					58	1	58	49.083					58	0.039	58	48.191	58	0.405	58	80.261									58	4.997	58	61.641	58	9.002
59	0	59	35.861					59	1.229	59	102.543	59	2.415	59	81.016					59	1.686	59	50.413									59	2.946	59	80.021									59	2.233	59	66.9666	59	7.54
								60	2	60	104.233	60	3.219	60	82.319					60	1.761	60	52.703									60	7.493	60	78.862									60	0.865	60	69.894	60	4.713
								61	2.688	61	110.985	61	4.023	61	83.951					61	2	61	55.201									61	12.147	61	74.488									61	0.948	61	74.9128	61	2.002
								62	3.674	62	121.054	62	4.299	62	83.826					62	2	62	56.615									62	11.936	62	75.188									62	1	62	77.64
								63	4.463	63	131.44	63	4.208	63	84.356					63	2.25	63	54.926									63	7.964	63	80.133									63	1	63	78.82
												64	2.888	64	84.641																	64	3.259	64	81.585									64	1	64	83.1
												65	1.526	65	81.093																	65	1.211	65	85.058									65	1	65	87.28
												66	1	66	78.503																	66	0.206	66	84.111									66	1.82	66	88.82
												67	1.226	67	75.877																	67	0.409	67	87.141									67	3.64	67	89.82
												68	1.549	68	78.002																	68	0.6	68	90.656									68	6.46	68	85.9
												69	2.386	69	83.431																	69	1	69	84.059
												70	2.04	70	89.935																	70	1	70	78.825
												71	1.772	71	94.877																	71	1.49	71	77.479
												72	1.228	72	91.949
[truncated: 102 more columns]

## Sheet: Binned
18	1	FISH	PI	2	FISH	PI	3	FISH	PI	4	FISH	PI	5	FISH	PI	6	FISH	PI	8	FISH	PI	9	FISH	PI	10	FISH	PI	11	FISH	PI	13	FISH	PI	14	FISH	PI	15	FISH	PI	16	FISH	PI	17	FISH	PI	18	FISH	PI	19
X	X	Y	Y	X	Y	Y	X	Y	Y	X	Y	Y	X	Y	Y	X	Y	Y	X	Y	Y	X	Y	Y	X	Y	Y	X	Y	Y	X	Y	Y	X	Y	Y	X	Y	Y	X	Y	Y	X	Y	Y	X	Y	Y	X
0	0	0	132	0	0	164	0	0	134	0	0	166	0	1	107	0	1	185	0	0	132	0	0	186	0	1	158	0	0	143	0	0	199	0	2	137	0	1	118	0	1	107	0	0	169	0	0	218	0
1	1.69492	0	144.491	1.72414	0	176.69	1.5873	0	140.917	1.38889	0	180.435	1.78571	1	110.769	1.5873	1	200.54	2.5641	0	135.916	1.72414	0	190.528	1.40845	1	158.164	2	0	145.48	1.92308	0	197.8	1.47059	2.942	122.217	1.63934	1.614	136.197	1.85185	0.132	107.672	1.42857	0	170	1.31579	0	230.934	1.78571
2	3.38983	0	157.133	3.44828	0	191.717	3.1746	0	136.682	2.77778	0	187.799	3.57143	0.832	108.76	3.1746	1	198.444	5.12821	0	140.546	3.44828	0	198.891	2.8169	1	172.588	4	0	152.144	3.84615	0	181.951	2.94118	3.789	109.373	3.27869	2.552	142.765	3.7037	0	110.94	2.85714	0	173	2.63158	0	240.532	3.57143
3	5.08475	0	168.991	5.17241	0	188.115	4.7619	0.207	131.651	4.16667	0	185.577	5.35714	0	100.347	4.7619	1	187.944	7.69231	0	144.692	5.17241	0	200.632	4.22535	1	189.339	6	0	152.997	5.76923	0	170.843	4.41176	4.791	91.7684	4.91803	3.316	140.72	5.55556	0	103.787	4.28571	0	175	3.94737	0	245.262	5.35714
4	6.77966	0	177.126	6.89655	0	185.056	6.34921	0	129.673	5.55556	0	180.77	7.14286	0	92.4455	6.34921	1	171.773	10.2564	0	133.322	6.89655	0	199.273	5.6338	0.054	204.439	8	0	150.07	7.69231	0	164.014	5.88235	4.422	75.8136	6.55738	3.983	140.541	7.40741	0	98.0862	5.71429	0	171	5.26316	0	228.337	7.14286
5	8.47458	0	173.536	8.62069	0	178.84	7.93651	0	125.609	6.94444	0	176.246	8.92857	0	84.608	7.93651	1	154.408	12.8205	0	118.282	8.62069	0	181.877	7.04225	0	211.077	10	0	147.569	9.61538	0	153.878	7.35294	3.056	63.8359	8.19672	6.365	143.536	9.25926	0	97.5438	7.14286	0	161	6.57895	0	199.567	8.92857
6	10.1695	0	167.073	10.3448	0	171.324	9.52381	0	119.927	8.33333	0	170.125	10.7143	0	78.3804	9.52381	1	138.824	15.3846	0	103.886	10.3448	0	158.543	8.4507	0	209.155	12	0	131.299	11.5385	0	137.785	8.82353	1.267	54.1204	9.83607	13.587	131.493	11.1111	0	98.8707	8.57143	0	145	7.89474	0	174.349	10.7143
7	11.8644	0	154.037	12.069	0	152.984	11.1111	0	118.233	9.72222	0	162.646	12.5	0	71.8795	11.1111	0.286	123.159	17.9487	0	87.533	12.069	0	138.079	9.85915	0	206.672	14	0	106.516	13.4615	0	120.66	10.2941	0.021	48.115	11.4754	21.136	113.775	12.963	0	96.0777	10	0	125	9.21053	0	160.736	12.5
8	13.5593	0	134.622	13.7931	0	129.518	12.6984	0	113.958	11.1111	0	156.726	14.2857	0	64.4525	12.6984	0	107.355	20.5128	0.333	73.614	13.7931	0	114.909	11.2676	0	200.713	16	0	90.92	15.3846	0	106.815	11.7647	0.051	46.5543	13.1148	22.244	94.261	14.8148	0	96.9459	11.4286	0	110	10.5263	0	144.054	14.2857
9	15.2542	0	116.142	15.5172	0	106.804	14.2857	0	107.952	12.5	0	153.907	16.0714	0	55.8743	14.2857	0	91.393	23.0769	1.704	62.421	15.5172	0	90.375	12.6761	0	184.515	18	0	76.973	17.3077	0	96.57	13.2353	0.379	47.535	14.7541	12.866	79.596	16.6667	0	101.756	12.8571	0	104	11.8421	0	126.76	16.0714
10	16.9492	0	100.447	17.2414	0	86.887	15.873	0	101.061	13.8889	0	143.721	17.8571	0	50.0835	15.873	0	76.99	25.641	3.421	55.728	17.2414	0	75.856	14.0845	0	165.454	20	4.17	70.943	19.2308	0	86.745	14.7059	1.318	47.09	16.3934	3.543	69.568	18.5185	0	106.907	14.2857	0	101	13.1579	0	110.943	17.8571
11	18.6441	0	84.813	18.9655	0	73.962	17.4603	0	93.7902	15.2778	0	130.993	19.6429	0	48.393	17.4603	0	62.065	28.2051	6.36	51.219	18.9655	0	66.274	15.493	0	148.085	22	23.232	67.611	21.1538	0	76.436	16.1765	1.736	43.9819	18.0328	0.474	64.319	20.3704	0	112.142	15.7143	0	91	14.4737	0	99.69	19.6429
12	20.339	0	72.772	20.6897	0	68.203	19.0476	0	84.3782	16.6667	0.235	119.928	21.4286	0	48.2065	19.0476	0	52.73	30.7692	13.356	46.322	20.6897	0	59.188	16.9014	0.066	131.549	24	57.768	64.745	23.0769	0	72.434	17.6471	0.824	37.8275	19.6721	0.367	61.983	22.2222	0	111.408	17.1429	2	81	15.7895	0	93.244	21.4286
13	22.0339	0	62.698	22.4138	0	64.353	20.6349	0	84.8204	18.0556	2.954	111.988	23.2143	0	45.8947	20.6349	0	45.037	33.3333	29.666	43.751	22.4138	0	57.951	18.3099	0.706	117.965	26	99.504	64.489	25	0	68.516	19.1176	0	32.4747	21.3115	2.274	61.836	24.0741	0.432	109.638	18.5714	15	75	17.1053	0.915	94.698	23.2143
14	23.7288	0	60.29	24.1379	3.013	67.804	22.2222	0	81.506	19.4444	13.95	105.372	25	0	45.8598	22.2222	0	42.638	35.8974	58.84	39.52	24.1379	0	60.919	19.7183	1.686	109.723	28	137.509	65.368	26.9231	2.44	61.12	20.5882	0	31.4619	22.9508	11.05	61.559	25.9259	3.024	108.529	20	48	67	18.4211	7.928	90.905	25
15	25.4237	0	63.58	25.8621	14.972	71.817	23.8095	0	77.2203	20.8333	33.025	102.723	26.7857	0.824	48.6186	23.8095	0	43.289	38.4615	95.18	36.76	25.8621	2.129	65.883	21.1268	3.485	103.872	30	155.309	61.619	28.8462	18.03	56.78	22.0588	0	31.2383	24.5902	35.54	58.186	27.7778	10.998	105.001	21.4286	90	67	19.7368	29.683	83.276	26.7857
16	27.1186	0	68.406	27.5862	41.858	76.943	25.3968	0.68	72.7668	22.2222	57.348	102.444	28.5714	5.478	51.3046	25.3968	0.13	44.593	41.0256	129.22	37.86	27.5862	16.606	67.015	22.5352	5.221	102.352	32	169.114	56.66	30.7692	58.72	54.78	23.5294	0.738	31.3952	26.2295	86.315	58.63	29.6296	36.572	104.97	22.8571	131	68	21.0526	70.529	74.213	28.5714
17	28.8136	0	74.116	29.3103	86.681	75.553	26.9841	4.387	69.1068	23.6111	87.57	98.837	30.3571	21.737	52.2204	26.9841	5.13	45.933	43.5897	140.38	42.72	29.3103	57.241	67.399	23.9437	7.177	104.932	34	171.369	49.676	32.6923	122.92	50.95	25	6.705	31.5683	27.8689	135.776	59.749	31.4815	78.917	105.229	24.2857	156	76	22.3684	117.351	66.038	30.3571
18	30.5085	0.577	73.511	31.0345	128.095	69.429	28.5714	9.789	68	25	116.851	93.524	32.1429	40.002	51.6194	28.5714	25.693	49.426	46.1538	123.26	51.2	31.0345	121.674	67.961	25.3521	11.743	110.091	36	175.247	46.488	34.6154	183.33	48.39	26.4706	27.728	31.9993	29.5082	162.071	61.714	33.3333	132.18	101.525	25.7143	170	80	23.6842	159.602	65.682	32.1429
19	32.2034	1.99	66.051	32.7586	146.013	63.559	30.1587	21.382	71.4338	26.3889	141.713	86.752	33.9286	52.236	50.1538	30.1587	77.398	52.711	48.7179	85.1	64.3	32.7586	176.733	65.09	26.7606	21.101	122.71	38	191.324	47.166	36.5385	194.24	46.17	27.9412	75.305	30.7611	31.1475	160.005	56.686	35.1852	185.448	90.3711	27.1429	186	81	25	204.215	73.581	33.9286
20	33.8983	4.042	59.78	34.4828	163.595	56.721	31.746	44.118	74.6171	27.7778	159.292	79.345	35.7143	57.813	47.9856	31.746	164.677	55.821	51.2821	43.629	75.985	34.4828	197.883	56.495	28.169	38	129	40	196.436	48.924	38.4615	153.23	43.78	29.4118	144.572	28.0981	32.7869	146.198	54.419	37.037	208.504	74.9954	28.5714	188	77	26.3158	232.141	79.47	35.7143
21	35.5932	6.68	58.16	36.2069	166.403	49.366	33.3333	72.858	77.5297	29.1667	169.753	71.557	37.5	60.881	44.96	33.3333	233.926	54.505	53.8462	17.008	79.561	36.2069	189.54	47.596	29.5775	52.25	126.426	42	178.895	48.791	40.3846	96.84	44.83	30.8824	195.971	27.4413	34.4262	137.331	50.74	38.8889	186.585	63.9468	30	162	71	27.6316	234.302	82.883	37.5
22	37.2881	9.493	59.841	37.931	158.738	46.909	34.9206	105.099	76.4782	30.5556	167.701	66.948	39.2857	69.719	42.3764	34.9206	237.764	50.063	56.4103	4.664	77.384	37.931	165.645	40.529	30.9859	63.234	117.872	44	145.368	48.338	42.3077	56.09	48.44	32.3529	201.204	27.944	36.0656	132.781	45.572	40.7407	134.061	58.2351	31.4286	129.936	65.1949	28.9474	214.346	85.174	39.2857
23	38.9831	15.649	63.238	39.6552	138.838	45.969	36.5079	137.368	69.3668	31.9444	149.767	61.556	41.0714	89.543	39.8719	36.5079	208.548	44.334	58.9744	0.536	73.914	39.6552	131.198	35.569	32.3944	79.814	108.921	46	103.007	48.207	44.2308	33.63	53.66	33.8235	165.595	27.943	37.7049	128.493	40.45	42.5926	75.865	54.044	32.8571	92.587	57.5079	30.2632	197.415	87.108	41.0714
24	40.678	25.068	66.143	41.3793	111.013	42.885	38.0952	164.723	63.1621	33.3333	121.588	59.903	42.8571	110.991	36.6622	38.0952	163.669	38.559	61.5385	0	72.857	41.3793	102.511	34.125	33.8028	102.239	99.378	48	70.981	47.962	46.1538	21.51	62.71	35.2941	117.94	27.3554	39.3443	107.164	38.231	44.4444	33.62	50.3631	34.2857	68.18	51.8672	31.5789	191.911	90.137	42.8571
25	42.3729	33.363	70.152	43.1034	86.554	39.706	39.6825	175.267	62.0223	34.7222	90.262	60.63	44.6429	113.924	34.4448	39.6825	134.832	34.133	64.1026	0	78.23	43.1034	88.134	34.444	35.2113	119.348	92.206	50	57.032	49.903	48.0769	16.17	70.05	36.7647	84.316	26.4192	40.9836	77.183	39.66	46.2963	13.022	46.8667	35.7143	57.738	50.5418	32.8947	202.47	98.259	44.6429
26	44.0678	51.485	79.008	44.8276	56.582	35.906	41.2698	160.455	60.2729	36.1111	74.078	60.475	46.4286	90.569	34	41.2698	119.28	31.772	66.6667	0	89.434	44.8276	89.072	38.679	36.6197	111.843	89.235	52	53.279	54.024	50	14.39	73.22	38.2353	72.115	26.2454	42.623	43.631	41.83	48.1481	5.421	43.6754	37.1429	50.13	52.3364	34.2105	212.279	95.144	46.4286
27	45.7627	80.555	81.243	46.5517	27.994	36.222	42.8571	131.073	56.4374	37.5	61.081	58.059	48.2143	57.617	34.2514	42.8571	103.852	32.128	69.2308	0	100.564	46.5517	108.247	45.49	38.0282	93.547	85.71	54	49.559	63.283	51.9231	10.95	75.83	39.7059	77.146	29.1439	44.2623	22.491	43.152	50	4.267	41.076	38.5714	38.698	60.4457	35.5263	207.47	87.163	48.2143
28	47.4576	109.05	73.922	48.2759	10.909	39.481	44.4444	96.473	52.5467	38.8889	52.305	53.25	50	35.519	35.9109	44.4444	82.355	35.292	71.7949	0	104.146	48.2759	129.19	53.356	39.4366	62.081	81.35	56	40.001	78.7	53.8462	5.95	78.83	41.1765	91.011	33.095	45.9016	8.902	45.96	51.8519	5.376	41.4799	40	27.644	67.3029	36.8421	179.923	79.927	50
29	49.1525	126.164	68.633	50	3.485	46.625	46.0317	78.451	49.8271	40.2778	47.722	47.302	51.7857	34.754	40.4624	46.0317	58.451	43.373	74.359	0	103.134	50	125.443	62.937	40.8451	45.536	74.23	58	22.085	91.462	55.7692	2.17	78.78	42.6471	101.856	35.968	47.541	3.915	51.762	53.7037	6.258	44.4577	41.4286	15.713	71.9528	38.1579	134.114	74.117	51.7857
30	50.8475	136.908	62.949	51.7241	0.633	59.783	47.619	82.271	48.3275	41.6667	44.533	47.15	53.5714	48.947	46.3933	47.619	37.332	54.177	76.9231	0	98.145	51.7241	93.124	71.392	42.2535	41.213	65.098	60	6.725	100.957	57.6923	0.39	75.56	44.1176	100.202	43.0397	49.1803	2.062	56.457	55.5556	5.782	49.5796	42.8571	6.055	75.5505	39.4737	84.737	81.037	53.5714
31	52.5424	137.219	53.354	53.4483	0	75.834	49.2063	97.867	50.488	43.0556	49.308	52.483	55.3571	62.28	51.8822	49.2063	22.768	65.396	79.4872	0	87.179	53.4483	53.78	80.829	43.662	52.367	57.585	62	0.705	102.101	59.6154	0	72.17	45.5882	85.322	51.8741	50.8197	1.109	62.579	57.4074	4.057	57.8723	44.2857	0.89	78.7988	40.7895	47.723	94.656	55.3571
32	54.2373	126.835	44.233	55.1724	0	87.119	50.7937	108.49	57.6201	44.4444	55.159	59.183	57.1429	60.357	57.1029	50.7937	10.526	75.433	82.0513	0	76.033	55.1724	27.489	79.485	45.0704	69.231	51.442	64	0	96.101	61.5385	0	69.78	47.0588	66.91	58.9633	52.459	0.479	69.176	59.2593	2.183	64.636	45.7143	0.006	80.5874	42.1053	21.68	104.545	57.1429
33	55.9322	100.559	38.061	56.8966	0	87.05	52.381	98.069	66.2203	45.8333	48.701	65.982	58.9286	36.185	57.1294	52.381	2.861	81.488	84.6154	0.239	63.742	56.8966	12.402	72.674	46.4789	85.999	48.102	66	0	89.309	63.4615	0	69.61	48.5294	45.132	61.3287	54.0984	0	73.897	61.1111	0.656	68.1781	47.1429	0	80.3246	43.4211	6.872	103.707	58.9286
34	57.6271	68.972	36.576	58.6207	0	82.298	53.9683	69.808	75.7831	47.2222	32.644	70.267	60.7143	13.154	55.5864	53.9683	0	80.992	87.1795	2.101	55.743	58.6207	4.45	66.429	47.8873	98.968	48.424	68	0.43	85.442	65.3846	0	71.22	50	23.614	59.7026	55.7377	0	74.281	62.963	0.105	71.6314	48.5714	0.031	76.4474	44.7368	0.961	102.907	60.7143
35	59.322	45.853	41.01	60.3448	0	75.833	55.5556	39.248	87.1757	48.6111	15.211	71.733	62.5	1.702	53.7871	55.5556	0	81.309	89.7436	4.843	54.804	60.3448	0.754	65.046	49.2958	97.852	51.391	70	4.526	84.921	67.3077	0	73.22	51.4706	8.529	57.9124	57.377	0	71.954	64.8148	0.221	72.8499	50	1.446	70.7134	46.0526	0	105.148	62.5
36	61.0169	31.294	52.895	62.069	0	68.281	57.1429	18.789	91.3542	50	5.055	72.11	64.2857	0.084	52.9411	57.1429	0	78.13	92.3077	6.97	54.266	62.069	0.052	66.372	50.7042	84.674	59.501	72	12.251	85.686	69.2308	0	72.78	52.9412	1.259	53.4834	59.0164	0	67.425	66.6667	0.369	74.625	51.4286	4.459	66.5247	47.3684	0	102.381	64.2857
37	62.7119	43.71	70.282	63.7931	0	63.772	58.7302	7.647	87.0135	51.3889	0.939	77.427	66.0714	0	53.1418	58.7302	0.017	71.956	94.8718	6.361	50.618	63.7931	0	65.81	52.1127	61.057	68.814	74	22.607	90.353	71.1538	0	70.78	54.4118	0.026	49.3054	60.6557	0	64.345	68.5185	1.226	77.6552	52.8571	6.668	58.7634	48.6842	0	91.178	66.0714
38	64.4068	67.872	87.748	65.5172	0	60.39	60.3175	2.196	83.6181	52.7778	0	82.091	67.8571	0	54.9311	60.3175	0.701	62.01	97.4359	4.47	44.47	65.5172	0	60.965	53.5211	37.874	76.014	76	33.531	95.641	73.0769	0.61	71.22	55.8824	0	48.2548	62.2951	0.065	66.248	70.3704	3.064	76.7418	54.2857	5.768	53.659	50	0	88.128	67.8571
39	66.1017	81.821	98.984	67.2414	0	57.331	61.9048	0	80.6482	54.1667	0	90.04	69.6429	0	56.0529	61.9048	2.088	61.384	100	3.319	40.171	67.2414	0	55.787	54.9296	17.406	83.895	78	35.59	96.742	75	1.61	72	57.3529	0	49.3183	63.9344	0.874	64.299	72.2222	4.309	75.7067	55.7143	3.898	52.7099	51.3158	0	88.171	69.6429
40	67.7966	67.134	105.298	68.9655	0	55.04	63.4921	0	82.2774	55.5556	0	95.251	71.4286	0	56.2901	63.4921	3.251	62.938				68.9655	0.286	52.791	56.338	5.135	89.435	80	29.552	94.487	76.9231	2	71.39	58.8235	0	54.9788	65.5738	2.088	61.695	74.0741	3.502	76.3096	57.1429	1.359	55.3825	52.6316	0	91.349	71.4286
41	69.4915	49.495	109.709	70.6897	0	52.676	65.0794	0	80.6451	56.9444	0	90.764	73.2143	0	56.8842	65.0794	3.958	64.797				70.6897	0.265	51.905	57.7465	0.826	98.095	82	19.2	88.4	78.8462	1.39	71	60.2941	0	61.3756	67.2131	3.488	59.525	75.9259	1.843	73.4561	58.5714	0	61.6145	53.9474	0	98.105	73.2143
42	71.1864	30.877	106.419	72.4138	0	53.125	66.6667	0	85.9799	58.3333	0	81.578	75	0	53.9751	66.6667	2.447	65.885				72.4138	0.033	53.598	59.1549	0	110.174	84	9	83.8	80.7692	0.39	69.17	61.7647	0	65.4929	68.8525	3.544	60.853	77.7778	1.001	68.027	60	0	68.7056	55.2632	0	103.048	75
43	72.8814	13.169	92.932	74.1379	0	57.673	68.254	0	90.3808	59.7222	0	72.886	76.7857	0.041	50.4793	68.254	1.766	68.446				74.1379	0	55.545	60.5634	0	113.562	86	3	79	82.6923	0	66.78	63.2353	0	66.3264	70.4918	2.92	66.877	79.6296	0.883	64.2033	61.4286	0	73.5076	56.5789	0	100.295	76.7857
44	74.5763	3.599	82.89	75.8621	0	64.437	69.8413	0	88.0663	61.1111	0	65.262	78.5714	0.817	48.9933	69.8413	1.92	68.834				75.8621	2.414	57.602	61.9718	0	111.837	88	0.4	76.4	84.6154	0	69.05	64.7059	0	64.9078	72.1311	2.464	78.126	81.4815	0.766	63.4393	62.8571	0	73.1702	57.8947	0	91.157	78.5714
45	76.2712	0.581	75.112	77.5862	0.032	71.612	71.4286	0	86.0425	62.5	1.092	61.804	80.3571	3.002	50.281	71.4286	1.213	66.808				77.5862	7.612	57.48	63.3803	0	106.516	90	2.4	76	86.5385	1.22	75.27	66.1765	0	60.9513	73.7705	2.128	89.604	83.3333	0.807	65.3469	64.2857	0.239	72.9282	59.2105	0	84.217	80.3571
46	77.9661	0	72.692	79.3103	0.157	72.14	73.0159	0	87.885	63.8889	2.297	62.355	82.1429	6.502	51.3155	73.0159	1	65.256				79.3103	11.077	57.848	64.7887	0	102.376	92	7	74.4	88.4615	3.22	79.22	67.6471	0	50.5587	75.4098	1.631	99.597	85.1852	1.544	68.1807	65.7143	0.244	72.84	60.5263	0	83.886	82.1429
47	79.661	0	72.847	81.0345	1.203	64.811	74.6032	0	91.394	65.2778	3.555	68.842	83.9286	10.947	47.9987	74.6032	1.201	64.718				81.0345	9.066	58	66.1972	0	95.911	94	12	74	90.3846	5.22	79.39	69.1176	0	46.2678	77.0492	1.477	98.937	87.037	2.721	73.6758	67.1429	0.422	67.9892	61.8421	0	83.564	83.9286
48	81.3559	0	74.846	82.7586	1.663	55.516	76.1905	0	96.8098	66.6667	3.556	71.603	85.7143	11.694	46.3739	76.1905	1.908	62.443				82.7586	4.85	57.854	67.6056	0	88.238	96	14.6	72.4	92.3077	6	77.17	70.5882	0.571	45.1588	78.6885	1	92.079	88.8889	3.592	85.5486	68.5714	1.26	63.7528	63.1579	0.312	83.327	85.7143
49	83.0508	0	72.272	84.4828	1.303	49.683	77.7778	0.41	100.073	68.0556	2.627	73.561	87.5	7.645	46.1317	77.7778	2.615	60.391				84.4828	2.367	59.458	69.0141	0	84.641	98	12.6	71.2	94.2308	5.39	82.1	72.0588	1.115	44.9684	80.3279	1	83.023	90.7407	3.757	96.9827	70	3.803	62.1074	64.4737	1.744	83.05	87.5
50	84.7458	0	66.364	86.2069	1	46.851	79.3651	0.893	101.874	69.4444	1.822	75.033	89.2857	4.141	46.804	79.3651	3.437	58.459				86.2069	1.746	62.463	70.4225	0	83.021	100	9.6	67	96.1538	3.78	85.39	73.5294	2.497	46.6069	81.9672	0.451	72.358	92.5926	4.208	99.3442	71.4286	6.275	62.3683	65.7895	2.67	81.537	89.2857
51	86.4407	0	60.965	87.931	0.474	47.617	80.9524	1.538	104.585	70.8333	1.017	76.498	91.0714	1.992	50.8443	80.9524	2.999	57.798				87.931	1.733	66.844	71.831	0	84.993				98.0769	2.39	78.9	75	3.412	50.3041	83.6066	0.369	68.444	94.4444	7.009	101.565	72.8571	8.169	61.0875	67.1053	2.969	84.091	91.0714
52	88.1356	0	56.286	89.6552	0	51.527	82.5397	1.627	101.712	72.2222	1	72.072	92.8571	0.792	55.9488	82.5397	2.458	55.014				89.6552	1.865	69.922	73.2394	0	83.269				100	1.39	65.24	76.4706	4.64	53.1721	85.2459	0.464	67.865	96.2963	14.291	109.074	74.2857	7.253	58.6051	68.4211	1.845	84.427	92.8571
53	89.8305	0	50.645	91.3793	0.299	57.283	84.127	1.156	94.9159	73.6111	1	76.706	94.6429	0.512	59.9995	84.127	1.556	53.276				91.3793	2.194	67.753	74.6479	0	82.914							77.9412	6.066	55.5674	86.8852	0.814	67.475	98.1481	36.277	114.16	75.7143	6.304	58.2483	69.7368	1.603	78.018	94.6429
54	91.5254	0	44.337	93.1034	1.37	63.996	85.7143	0.645	91.8828	75	1	85.148	96.4286	1.112	61.7682	85.7143	1	50.512				93.1034	2.64	61.398	76.0563	0	83.876							79.4118	6.575	57.0725	88.5246	0.642	68.993	100	51.362	109.597	77.1429	8.954	64.4855	71.0526	0.804	77.565	96.4286
55	93.2203	0	39.676	94.8276	2.744	63.017	87.3016	0.211	91.3389	76.3889	1	91.021	98.2143	1.897	61.2213	87.3016	1	50.488				94.8276	3.028	55.534	77.4648	0	85.02							80.8824	11.999	59.0487	90.1639	1.414	69.912				78.5714	13.503	70.6476	72.3684	0.366	75.531	98.2143
56	94.9153	0	36.18	96.5517	4.942	62.068	88.8889	0	91.7561	77.7778	1	90.985	100	2.124	56.0449	88.8889	0.754	50.884				96.5517	1.725	50.454	78.8732	0	83.905							82.3529	13.962	58.0014	91.8033	3.255	73.395				80	16.922	70.8126	73.6842	0.941	72.873	100
57	96.6102	0	35.506	98.2759	4.714	60.767	90.4762	0.3	94.8527	79.1667	1	88.74				90.4762	1	51.382				98.2759	0.432	50.239	80.2817	0	82.918							83.8235	10.116	58.6776	93.4426	6.427	79.638				81.4286	15.139	70.7785	75	0.988	71.495
58	98.3051	0	36.253	100	3.215	55.233	92.0635	1	100.052	80.5556	1.702	86.087				92.0635	1	49.083				100	0.039	48.191	81.6901	0.405	80.261							85.2941	4.997	61.641	95.082	9.002	84.718				82.8571	8.877	70.8631	76.3158	1.48	68.689
59	100	0	35.861				93.6508	1.229	102.543	81.9444	2.415	81.016				93.6508	1.686	50.413							83.0986	2.946	80.021							86.7647	2.233	66.9666	96.7213	7.54	87.725				84.2857	3.71	65.9359	77.6316	2.2	61.576
60							95.2381	2	104.233	83.3333	3.219	82.319				95.2381	1.761	52.703							84.507	7.493	78.862							88.2353	0.865	69.894	98.3607	4.713	84.854				85.7143	1.132	67.3097	78.9474	3.772	59.208
61							96.8254	2.688	110.985	84.7222	4.023	83.951				96.8254	2	55.201							85.9155	12.147	74.488							89.7059	0.948	74.9128	100	2.002	76.512				87.1429	0.615	68.6012	80.2632	5.713	63.497
62							98.4127	3.674	121.054	86.1111	4.299	83.826				98.4127	2	56.615							87.3239	11.936	75.188							91.1765	1	77.64							88.5714	2.759	67.2817	81.5789	6.832	63.539
63							100	4.463	131.44	87.5	4.208	84.356				100	2.25	54.926							88.7324	7.964	80.133							92.6471	1	78.82							90	9.437	64.3909	82.8947	6.193	62.667
64										88.8889	2.888	84.641													90.1408	3.259	81.585							94.1176	1	83.1							91.4286	22.295	61.7079	84.2105	4.581	61.261
65										90.2778	1.526	81.093													91.5493	1.211	85.058							95.5882	1	87.28							92.8571	33.353	60.547	85.5263	3.216	65.067
66										91.6667	1	78.503													92.9577	0.206	84.111							97.0588	1.82	88.82							94.2857	33.749	63.5674	86.8421	2.199	67.229
67										93.0556	1.226	75.877													94.3662	0.409	87.141							98.5294	3.64	89.82							95.7143	24.09	66.6021	88.1579	2.707	69.147
68										94.4444	1.549	78.002													95.7746	0.6	90.656							100	6.46	85.9							97.1429	11.165	68.5111	89.4737	3	70.069
69										95.8333	2.386	83.431													97.1831	1	84.059																98.5714	3.975	67.2726	90.7895	4.213	69.349
70										97.2222	2.04	89.935													98.5915	1	78.825																100	1.293	66.9552	92.1053	5.091	64.525
71										98.6111	1.772	94.877													100	1.49	77.479																			93.4211	5.407	64.176
72										100	1.228	91.949																																		94.7368	5.353	69.13
73																																														96.0526	5.307	69.17
74																																														97.3684	4.458	69.479
75																																														98.6842	3.759	69.864
76																																														100	3.459	68.715
	0			0			0			0			0			0			0			0			0			0			0			0			0			0			0			0			0
	5	0	144.541	5	0	177.469	5	0.05175	135.812	5	0	179.953	5	0.944	108.843	5	1	192.982	5	0	133.958	5	0	191.806	5	1	169.523	5	0	146.875	5	0	192.917	5	3.3805	115.09	5	2.1205	134.421	5	0.377333	108.537	5	0	171.75	5	0	233.682	5
	10	0	173.218	10	0	184.004	10	0	125.07	10	0	172.447	10	0	92.4667	10	1	155.002	10	0	142.619	10	0	193.927	10	0.0135	207.836	10	0	150.212	10	0	162.912	10	2.915	64.59	10	7.97833	138.523	10	0	99.8057	10	0	150.5	10	0	190.747	10
	15	0	151.911	15	0	151.275	15	0	113.381	15	0	151.451	15	0	71.5708	15	0.0953333	107.302	15	0	125.802	15	0	137.177	15	0	183.561	15	0	128.461	15	0	129.222	15	0.44225	47.3236	15	18.7487	95.8773	15	0	97.2981	15	0	110	15	0	120.362	15
	20	0	100.467	20	0	89.2177	20	0	93.0765	20	4.28475	117.07	20	0	51.4503	20	0	63.9283	20	0	95.7095	20	0	77.5017	20	0.6145	126.831	20	1.39	79.612	20	0	96.71	20	0.853333	38.0947	20	1.46133	65.29	20	0	104.332	20	16.25	78.5	20	9.6315	90.5307	20
	25	0	65.2533	25	1.00433	66.7867	25	0	81.1822	25	73.6985	99.382	25	0	46.6537	25	0	43.6547	25	1.0185	68.0175	25	0	59.3527	25	5.29433	103.719	25	28.39	67.7663	25	0	72.462	25	1.86075	31.4159	25	16.288	60.527	25	0.144	111.063	25	106.25	69.5	25	137.924	69.8785	25
	30	0	68.7007	30	47.837	74.771	30	4.952	69.9579	30	146.902	82.7945	30	2.10067	48.5943	30	10.3177	46.6507	30	4.8905	53.4735	30	25.3253	66.7657	30	30.7735	122.057	30	130.774	63.8253	30	6.82333	62.1387	30	63.5775	30.6067	30	128.054	60.031	30	16.8647	106.167	30	176.5	77.25	30	221.251	80.277	30
	35	2.203	66.4473	35	145.901	63.2363	35	60.8642	75.0147	35	132.329	62.2592	35	37.9917	51.3312	35	178.441	53.275	35	21.511	45.0365	35	165.43	63.182	35	81.7623	108.724	35	165.264	55.985	35	121.657	51.3733	35	187.59	27.7761	35	147.845	53.9483	35	105.549	103.377	35	113.176	61.3925	35	201.019	92.662	35
	40	10.6073	60.413	40	154.66	47.4147	40	159.119	64.8504	40	62.488	57.2613	40	62.8043	45.1073	40	169.016	39.0087	40	77.01	38.14	40	162.128	41.2313	40	96.7048	87.1252	40	187.669	47.526	40	173.735	44.975	40	87.8792	27.291	40	122.813	41.4177	40	193.512	76.4378	40	43.5525	57.6567	40	151.561	80.561	40
	45	36.6387	71.7677	45	84.7163	39.499	45	129.334	56.419	45	49.1805	51.5295	45	104.819	36.993	45	101.829	33.064	45	134.8	40.29	45	93.239	35.7493	45	46.372	65.6377	45	173.566	48.6843	45	62.1867	48.9767	45	97.6897	37.3676	45	47.7683	41.5473	45	81.182	54.2141	45	12.5755	73.4013	45	19.309	101.454	45
	50	105.256	74.5993	50	14.1293	40.776	50	86.1963	49.5475	50	25.4027	70.023	50	61.235	34.7208	50	39.517	54.3153	50	104.18	57.75	50	120.96	53.9277	50	88.0125	49.8397	50	77.0067	48.6907	50	17.3567	68.66	50	55.2445	57.9672	50	4.95967	51.393	50	7.57	43.8727	50	0.37075	77.0182	50	0	96.7087	50
	55	133.654	53.512	55	1.37267	60.7473	55	92.1223	66.5412	55	1.4985	80.417	55	39.74	40.9222	55	4.46233	79.3043	55	30.3185	77.773	55	90.7823	71.7193	55	50.2527	72.056	55	53.29	55.7367	55	10.43	75.96	55	8.357	55.1009	55	0.529333	68.5507	55	5.30033	42.3379	55	4.58525	62.4151	55	0	91.4383	55
	60	71.7947	38.549	60	0	85.489	60	21.8947	88.5145	60	0	85.1197	60	52.9407	55.3715	60	0.00566667	77.1317	60	2.6	75.649	60	14.7803	72.8627	60	1.987	99.2347	60	22.937	90.373	60	0.853333	75.5033	60	0	50.8506	60	0	71.22	60	4.00733	57.3626	60	1.31425	59.6031	60	0	94.6792	60
	65	47.6253	70.3083	65	0	69.2953	65	0.732	82.1812	65	1.12967	63.1403	65	4.98	54.1049	65	2.01333	62.1107	65	0	75.5435	65	0.268667	65.7427	65	0	108.573	65	2.47667	99.7197	65	0	69.695	65	0	64.5257	65	0.313	64.964	65	0.327333	70.8865	65	0.05975	72.0779	65	0.514	83.4567	65
	70	66.15	104.664	70	0	57.587	70	0	86.268	70	2.89	72.2597	70	0	54.7086	70	2.52275	66.9905	70	0	94.999	70	0.0953333	56.5143	70	0	89.5967	70	1.652	86.5573	70	0	72.4067	70	0	52.5926	70	3.04	60.691	70	0.7975	76.1401	70	1.43225	66.6724	70	2.27175	82.0182	70
	75	15.8817	94.0803	75	0	54.4913	75	0	88.4405	75	1.00425	77.606	75	0	55.7165	75	1.138	65.594	75	0	103.64	75	0.0993333	53.6827	75	0	83.5493	75	13.128	86.9867	75	0.74	71.3333	75	1.89875	46.7596	75	2.504	78.2023	75	3.625	76.2527	75	6.375	61.0421	75	0.77475	74.366	75
	80	0.193667	73.5503	80	0.063	69.3963	80	0.434333	99.5858	80	1	88.9735	80	0.286	51.1492	80	2.65333	60.431	80	0	92.662	80	7.03433	57.6433	80	0	84.267	80	32.891	95.6233	80	1.66667	71.4633	80	5.17325	54.029	80	1.36933	96.871	80	1.24233	68.5621	80	11.4208	66.0485	80	2.11	65.242	80
	85	0	71.1607	85	1.38967	56.67	85	1.44033	100.404	85	2.83975	83.3433	85	6.817	49.8651	85	2.33767	55.3627	85	0.1195	69.8875	85	5.42767	58.4373	85	2.711	80.5155	85	19.2507	88.8957	85	0.13	68.3333	85	12.0257	58.5759	85	0.606667	74.6083	85	0.7865	64.3931	85	11.162	69.5975	85	5.82975	62.741	85
	90	0	55.9653	90	0.491333	48.665	90	0.285333	91.6593	90	3.79833	84.2743	90	7.82667	46.4365	90	0.918	50.628	90	3.472	55.2735	90	1.78133	66.4097	90	10.6823	76.603	90	1.93333	77.1333	90	2.22	77.245	90	2.26075	68.3536	90	0.64	68.111	90	2.619	75.8017	90	3.48575	66.8959	90	2.7805	67.878	90
	95	0	40.0643	95	1.471	61.432	95	0.843	99.1493	95	1.32525	78.3688	95	1.09867	55.5975	95	1.22867	50.2927	95	6.6655	52.442	95	2.62067	61.5617	95	1.27125	84.4738	95	7.13333	74.8	95	5.53667	79.5533	95	1	79.8533	95	3.69867	74.315	95	4.99133	99.2973	95	24.7085	62.5533	95	5.016	66.795	95
	100	0	35.8733	100	4.29033	59.356	100	3.20625	116.928	100	1.8565	90.048	100	1.711	59.6781	100	2.00275	54.8612	100	3.8945	42.3205	100	0.732	49.628	100	1.0225	82.7548	100	12.2667	70.2	100	2.52	76.51	100	3.23	87.955	100	5.81425	83.4522	100	33.9767	110.943	100	10.1307	67.3353	100	4.24575	69.307	100
[truncated: 71 more columns]

## Sheet: Summary
% Chromosome Length
	FISH	PI	FISH	PI	FISH	PI
	Mean	Mean	STDDEV	STDDEV	SEM	SEM
5	0.763501	161.545	1.6454	29.4421	0.266919	4.77614
10	1.37123	152.088	4.95701	34.9722	0.804134	5.67324
15	1.82234	117.135	5.28889	32.9254	0.857972	5.3412
20	4.85199	85.2948	12.5255	22.7719	2.0319	3.6941
25	27.6361	74.169	37.3108	19.9821	6.0526	3.24152
30	77.4222	73.2416	68.4307	20.0247	11.1009	3.24843
35	122.627	64.8546	65.8755	17.0984	10.6864	2.77373
40	122.329	52.6824	53.719	12.8718	8.71437	2.08808
45	90.6539	51.3371	46.5889	15.3352	7.55772	2.4877
50	53.0453	62.7724	45.9063	18.9892	7.44699	3.08045
55	28.6174	74.7348	33.7785	18.1419	5.4796	2.943
60	10.1285	79.5137	16.944	16.7844	2.74868	2.72279
65	4.02085	78.4134	9.76828	17.7785	1.58462	2.88405
70	4.70023	78.1346	11.7109	19.1967	1.89976	3.11411
75	5.44427	75.5515	11.5836	18.0277	1.87911	2.92449
80	7.18982	74.819	15.6012	18.696	2.53084	3.03289
85	5.50535	73.6326	8.63728	20.5079	1.40115	3.32682
90	3.87019	73.4005	4.28434	20.0132	0.695012	3.24657
95	5.01633	74.2645	6.9448	19.505	1.1266	3.16413
100	5.08289	76.4257	6.09373	20.7853	0.988533	3.37181
