# Supplementary material for: Large domains of heterochromatin direct the formation of short mitotic chromosome loops
Source: eLife. 2020 Sep 11;9:e57212. doi: 10.7554/eLife.57212 (PMC7515631; doi:10.7554/eLife.57212)
Supplement: Figure 4—source data 2. [file elife-57212-fig4-data2.xlsx]

## Sheet: FISH Binned
35	1	FISH	4	FISH	5	FISH	6	FISH	7	FISH	14	FISH	20A	FISH	20B	FISH	26	FISH	30	FISH	31	FISH	32	FISH	35	FISH		21	4	FISH	15	FISH	21	FISH	27	FISH	3	FISH	11A	FISH
X	X	Y	X	Y	X	Y	X	Y	X	Y	X	Y	X	Y	X	Y	X	Y	X	Y	X	Y	X	Y	X	Y		X	X	Y	X	Y	X	Y	X	Y	X	Y	X	Y
0	0	293	0	317	0	252	0	295	0	240	0	232	0	308	0	371	0	371	0	278	0	322	0	277	0	141		0	0	380	0	641	0	235	0	473	0	666	0	374
0.5492	1.96074	310.73	1.92303	367.927	1.61286	287.3	2.32552	290.02	1.63931	254.55	1.58726	241.43	1.81813	333.39	2.08328	376.9	2.08328	376.9	1.81813	262	1.99995	336.88	2.17386	288.92	0.943372	145.891		0.11	1.69492	365.68	1.36986	601.14	0.787402	224	1.42857	511.07	2.5	723.52	1.49254	375.57
1.0984	3.92147	309.8	3.84606	428.015	3.22572	286.43	4.65104	317.86	3.27861	237.79	3.17452	230.79	3.63627	332.5	4.16656	412.08	4.16656	412.08	3.63627	276.96	3.9999	370.58	4.34772	298.418	1.88674	148.379		0.22	3.38983	389.81	2.73973	671.23	1.5748	255	2.85714	543.01	5	835.98	2.98507	414.95
1.6476	5.88221	312.13	5.76909	496.8	4.83858	305.51	6.97657	323.63	4.91792	247.39	4.76178	257.78	5.4544	327.77	6.24983	457.83	6.24983	457.83	5.4544	266.66	5.99985	398.83	6.52158	342.425	2.83012	145.777		0.33	5.08475	445.73	4.10959	799.32	2.3622	262	4.28571	545.65	7.5	999.99	4.47761	403.66
2.1969	7.8433	331.23	7.69247	573.705	6.45174	331.38	9.30251	343.93	6.55752	258.95	6.34933	261.15	7.27287	361.58	8.33349	508.56	8.33349	508.56	7.27287	272.79	8.00016	475.97	8.69584	376.975	3.77366	150.435		0.44	6.77966	499.38	5.47945	933.5	3.14961	269	5.71429	537.34	10	1235.32	5.97015	442.25
2.7461	9.80403	340.04	9.6155	668.367	8.0646	356.49	11.628	357.64	8.19682	262.1	7.93659	297.56	9.091	363.01	10.4168	571.67	10.4168	571.67	9.091	287.62	10.0001	492.09	10.8697	398.12	4.71703	149.729		0.55	8.47458	574.12	6.84932	1112.88	3.93701	285	7.14286	545.53	12.5	1462.33	7.46269	496.91
3.2953	11.7648	364.01	11.5385	717.255	9.67746	382.19	13.9536	381.64	9.83613	276.15	9.52385	309.72	10.9091	394.99	12.5	672.58	12.5	672.58	10.9091	297.63	12.0001	584.11	13.0436	430.115	5.6604	159.922		0.66	10.1695	695.34	8.21918	1490.04	4.72441	265	8.57143	580.43	15	1796.96	8.95522	568.48
3.8445	13.7255	384.49	13.4616	790.046	11.2903	441.55	16.2791	446.38	11.4754	286.02	11.1111	316.67	12.7273	430.17	14.5833	861.17	14.5833	861.17	12.7273	309.78	14	702.6	15.2174	501.813	6.60378	152.123		0.77	11.8644	843.33	9.58904	2040.2	5.51181	278	10	633.95	17.5	2414.63	10.4478	634.26
4.3937	15.6862	447.4	15.3846	896.596	12.9032	553.15	18.6046	504.93	13.1147	329.96	12.6984	334.64	14.5454	521.13	16.6666	1117.23	16.6666	1117.23	14.5454	323.94	16	875.67	17.3913	616.694	7.54715	148.848		0.88	13.5593	1025.06	10.9589	2717.66	6.29921	311	11.4286	708.31	20	3353.3	11.9403	737.38
4.9429	17.647	495.07	17.3076	921.635	14.516	714.32	20.9301	603.49	14.754	374.63	14.2856	368.91	16.3635	670.51	18.7499	1581.71	18.7499	1581.71	16.3635	347.96	17.9999	1074.99	19.5651	778.922	8.49052	159.198		0.99	15.2542	1201.96	12.3288	3436.86	7.08661	338	12.8571	766.64	22.5	3903.78	13.4328	898.12
5.4921	19.6077	653.3	19.2306	931.94	16.1289	836.62	23.2556	744.58	16.3933	482.7	15.8729	444.05	18.1817	887.16	20.8332	2140.47	20.8332	2140.47	18.1817	377.19	19.9999	1225.72	21.739	967.034	9.43389	153.598		1.1	16.9492	1432.77	13.6986	4058.85	7.87402	371	14.2857	844.86	25	4118.95	14.9254	1082.06
6.0414	21.5688	840.24	21.154	946.194	17.7421	962.13	25.5816	1024.11	18.033	622.36	17.4604	500.34	20.0001	1293.7	22.9168	2752.11	22.9168	2752.11	20.0001	421.57	22.0002	1413.3	23.9133	1108.06	10.3774	160.964		1.21	18.6441	1804.36	15.0685	4436.16	8.66142	462	15.7143	914.8	27.5	4281.87	16.4179	1322.8
6.5906	23.5295	1070.55	23.0771	1004.64	19.3549	1212.38	27.9071	1322.93	19.6723	833.59	19.0477	578	21.8183	1833.42	25.0001	3216.3	25.0001	3216.3	21.8183	529.2	24.0001	1636.74	26.0871	1168.39	11.3208	159.337		1.32	20.339	2025.24	16.4384	4598.33	9.44882	500	17.1429	962.85	30	4056.46	17.9104	1675.82
7.1398	25.4903	1330.67	25.0001	1005.85	20.9678	1492.1	30.2326	1706.61	21.3116	1056.5	20.635	644.69	23.6364	2363	27.0834	3437.29	27.0834	3437.29	23.6364	672.37	26.0001	1862.74	28.261	1155.52	12.2642	170.491		1.43	22.0339	2398.42	17.8082	4444.23	10.2362	702	18.5714	1033.35	32.5	3650.89	19.403	2296.97
7.689	27.451	1614.18	26.9231	971.477	22.5806	1530.96	32.5582	2026.3	22.9509	1219.81	22.2222	802.91	25.4545	2672.96	29.1667	3282.54	29.1667	3282.54	25.4545	879.55	28	1938.41	30.4349	1032.77	13.2076	170.962		1.54	23.7288	2568.69	19.1781	4332.55	11.0236	1065	20	1245.66	35	3156.03	20.8955	3011.04
8.2382	29.4117	1848.99	28.8461	953.768	24.1935	1541.92	34.8837	2323.7	24.5902	1385.77	23.8095	1075.35	27.2727	2829.18	31.2499	2920.24	31.2499	2920.24	27.2727	1073.73	30	1914.49	32.6087	873.939	14.1509	178.381		1.65	25.4237	2589.96	20.5479	4133.64	11.811	1427	21.4286	1403.6	37.5	2825.21	22.3881	3706.45
8.7874	31.3725	1944.29	30.7692	948.246	25.8064	1407.85	37.2092	2722.98	26.2295	1612.79	25.3967	1468.93	29.0908	2960.63	33.3332	2481.06	33.3332	2481.06	29.0908	1266.94	31.9999	1779.86	34.7826	800.486	15.0943	186.906		1.76	27.1186	2692.38	21.9178	3969.32	12.5984	1616	22.8571	1508.67	40	2387.46	23.8806	4302.18
9.3366	33.3332	1840.95	32.6922	891.724	27.4192	1275.78	39.5347	2963.79	27.8688	1713.74	26.984	2021.74	30.9089	3068.13	35.4165	2106.76	35.4165	2106.76	30.9089	1430.72	33.9999	1549.23	36.9564	707.194	16.0377	215.635		1.87	28.8136	2774.55	23.2877	3796.03	13.3858	1513	24.2857	1612.97	42.5	2009.89	25.3731	4686
9.8858	35.2939	1754	34.6152	877.706	29.0321	1148.87	41.8602	3023.59	29.5081	1760.6	28.5713	2595.29	32.7271	3091.04	37.4998	1732.95	37.4998	1732.95	32.7271	1609.54	35.9998	1357.03	39.1303	634.722	16.981	228.871		1.98	30.5085	2765.18	24.6575	3310.43	14.1732	1351	25.7143	1806.03	45	1604.89	26.8657	4921.64
10.4351	37.255	1628.24	36.5386	930.434	30.6452	1000.96	44.1862	2884.34	31.1477	1892.45	30.1588	3339.18	34.5455	2995.73	39.5834	1448.81	39.5834	1448.81	34.5455	1723.81	38.0001	1245.86	41.3046	564.575	17.9246	244.832		2.09	32.2034	2813.14	26.0274	2426.16	14.9606	1163	27.1429	2123.01	47.5	1333.6	28.3582	4815.85
10.9843	39.2158	1451.2	38.4616	940.591	32.2581	842.23	46.5117	2564.55	32.787	1825.96	31.7461	3841.45	36.3637	2904.22	41.6667	1127.88	41.6667	1127.88	36.3637	1745.48	40.0001	1125.1	43.4784	513.031	18.868	267.16		2.2	33.8983	2793.68	27.3973	1884.4	15.748	1048	28.5714	2448.13	50	1036.5	29.8507	4649.15
11.5335	41.1765	1256.3	40.3847	821.969	33.871	717.42	48.8372	2146.05	34.4263	1630.34	33.3333	4294.38	38.1818	2693.47	43.75	878.73	43.75	878.73	38.1818	1742.86	42	1074.43	45.6523	478.068	19.8113	294.858		2.31	35.5932	2652.11	28.7671	1878.78	16.5354	932	30	3023.51	52.5	892.05	31.3433	4548.3
12.0827	43.1372	1098.02	42.3077	713.669	35.4838	642.23	51.1628	1690.2	36.0656	1447.54	34.9206	4312.34	39.9999	2463.02	45.8333	689.67	45.8333	689.67	39.9999	1688.53	44	961.47	47.8261	440.733	20.7547	299.917		2.42	37.2881	2508.66	30.137	1808.59	17.3228	753	31.4286	3601.32	55	782.94	32.8358	4431.24
12.6319	45.098	882.23	44.2307	673.636	37.0967	568.43	53.4883	1250.91	37.7049	1362.85	36.5079	4399.7	41.8181	2126.61	47.9165	571.09	47.9165	571.09	41.8181	1499.93	45.9999	806.26	50	406.245	21.6981	280.278		2.53	38.9831	2351.01	31.5068	1685.31	18.1102	725	32.8571	3820.36	57.5	698.12	34.3284	4150.7
13.1811	47.0587	729.04	46.1538	692.705	38.7095	508.66	55.8138	871.75	39.3442	1256.21	38.0951	4000.6	43.6362	1912.77	49.9998	512.92	49.9998	512.92	43.6362	1349.08	47.9999	703.99	52.1739	367.731	22.6414	298.258		2.64	40.678	2167.54	32.8767	1590.71	18.8976	627	34.2857	3857.2	60	616.5	35.8209	3765.87
13.7303	49.0195	641.38	48.0768	752.625	40.3224	455.82	58.1393	640.43	40.9835	1149.54	39.6824	3564.04	45.4543	1689.99	52.0831	452.93	52.0831	452.93	45.4543	1204.43	49.9998	630.9	54.3477	331.719	23.5848	304.6		2.75	42.3729	2051.08	34.2466	1523.55	19.685	596	35.7143	3801.71	62.5	570.81	37.3134	3163.12
14.2796	50.9805	551.16	50.0002	807.352	41.9356	391.35	60.4653	545.01	42.6231	1052.85	41.2699	2922.06	47.2728	1463.23	54.1667	381.26	54.1667	381.26	47.2728	1061.39	52.0001	543.13	56.522	327.353	24.5284	322.056		2.86	44.0678	1864.92	35.6164	1462.57	20.4724	594	37.1429	3581.05	65	536.5	38.806	2666.55
14.8288	52.9413	468.33	51.9232	781.079	43.5484	335.93	62.7908	458.4	44.2624	882.31	42.8572	2426.67	49.0909	1258.97	56.25	367.89	56.25	367.89	49.0909	1008.98	54.0001	486.99	58.6958	342.492	25.4717	349.503		2.97	45.7627	1688.65	36.9863	1347.62	21.2598	580	38.5714	3213.26	67.5	489.11	40.2985	2273.1
15.378	54.902	402.81	53.8462	705.873	45.1613	323.23	65.1163	410.18	45.9017	758.11	44.4444	2216.22	50.9091	1045.98	58.3333	346.23	58.3333	346.23	50.9091	941.14	56	406.2	60.8697	324.369	26.4151	369.529		3.08	47.4576	1537.99	38.3562	1377.42	22.0472	523	40	2685.42	70	441.52	41.791	1853.08
15.9272	56.8628	369.45	55.7693	561.308	46.7741	305.71	67.4418	389.81	47.541	647.45	46.0317	1951.83	52.7272	846.54	60.4166	351.83	60.4166	351.83	52.7272	831.57	58	355.1	63.0436	292.588	27.3585	407.563		3.19	49.1525	1382.14	39.726	1340.08	22.8346	475	41.4286	2303.26	72.5	440.72	43.2836	1423.49
16.4764	58.8235	346.87	57.6923	496.028	48.387	273.59	69.7674	356.28	49.1803	559.49	47.619	1629.31	54.5453	720.53	62.4999	326.61	62.4999	326.61	54.5453	753.06	59.9999	311.45	65.2174	270.274	28.3018	447.257		3.3	50.8475	1220.79	41.0959	1266.08	23.622	397	42.8571	1957.4	75	413.4	44.7761	1092.19
17.0256	60.7842	321.59	59.6153	485.684	49.9999	260.45	72.0929	333.98	50.8197	469.83	49.2062	1363.65	56.3635	584.84	64.5831	285	64.5831	285	56.3635	667.98	61.9999	274.86	67.3913	253.938	29.2452	492.042		3.41	52.5424	1098.87	42.4658	1241.95	24.4094	379	44.2857	1659.53	77.5	393.57	46.2687	850.62
17.5748	62.745	296.04	61.5384	444.137	51.6127	257.64	74.4184	318.61	52.459	423.36	50.7935	1218.51	58.1816	468.12	66.6664	274.39	66.6664	274.39	58.1816	577.2	63.9998	256.97	69.5651	236.633	30.1886	516.797		3.52	54.2373	973.13	43.8356	1234.99	25.1969	335	45.7143	1381.56	80	370.02	47.7612	680.34
18.1241	64.7061	275.21	63.4617	393.541	53.2259	253.96	76.7444	310.12	54.0986	372.26	52.381	1140.39	60.0001	417.28	68.7501	258.33	68.7501	258.33	60.0001	524.87	66.0001	237.19	71.7394	234.679	31.1321	514.103		3.63	55.9322	825.78	45.2055	1144.07	25.9843	355	47.1429	1142.09	82.5	364.07	49.2537	590.96
18.6733	66.6668	260.39	65.3848	306.777	54.8387	252.12	79.0699	284.65	55.7379	314.94	53.9683	1056.05	61.8182	401.08	70.8333	252.43	70.8333	252.43	61.8182	456.91	68.0001	226.18	73.9133	223.817	32.0755	506.498		3.74	57.6271	733.29	46.5753	1047	26.7717	360	48.5714	964.42	85	349.78	50.7463	545.32
19.2225	68.6275	259.56	67.3078	262.521	56.4516	257.18	81.3954	295.79	57.3772	298.66	55.5556	805.8	63.6363	366.5	72.9166	249.25	72.9166	249.25	63.6363	427.65	70	225.07	76.0871	230.947	33.0189	433.476		3.85	59.322	664.01	47.9452	1008.89	27.5591	340.45	50	781.25	87.5	346.82	52.2388	505.64
19.7717	70.5883	247.04	69.2308	226.898	58.0644	238.4	83.7209	282.76	59.0165	268.84	57.1428	641.69	65.4545	336.79	74.9999	231.9	74.9999	231.9	65.4545	408.68	72	211.2	78.261	222.578	33.9622	412.127		3.96	61.0169	599.28	49.3151	934.52	28.3465	325.012	51.4286	614.9	90	345.14	53.7313	443.83
20.3209	72.549	239.54	71.1539	226.606	59.6773	231.08	86.0464	280.09	60.6558	261.92	58.7301	531.75	67.2726	302.48	77.0832	229.54	77.0832	229.54	67.2726	369.78	73.9999	207.29	80.4349	217.959	34.9056	374.117		4.07	62.7119	565.73	50.6849	871.18	29.1339	321.522	52.8571	515.01	92.5	344.71	55.2239	410.3
20.8701	74.5097	234.66	73.0769	210.045	61.2902	220.26	88.372	260.17	62.2951	261.12	60.3173	446.57	69.0907	289.1	79.1665	233.73	79.1665	233.73	69.0907	339.19	75.9999	213.72	82.6087	222.128	35.849	394.195		4.18	64.4068	504.22	52.0548	816.32	29.9213	304.49	54.2857	430.27	95	324.16	56.7164	408.7
21.4193	76.4705	229.63	74.9999	206.885	62.903	208.37	90.6975	257.64	63.9344	254.25	61.9046	375.66	70.9089	260.93	81.2497	233.09	81.2497	233.09	70.9089	297.51	77.9998	205.7	84.7826	214.173	36.7924	393.159		4.29	66.1017	439.69	53.4247	735.23	30.7087	290.851	55.7143	380.31	97.5	316.37	58.209	374.51
21.9685	78.4312	224.56	76.9229	204.462	64.5159	209.22	93.023	255.69	65.5737	261.26	63.4919	332.63	72.727	251.46	83.333	216.6	83.333	216.6	72.727	287.41	79.9998	210.06	86.9564	210.892	37.7357	425.084		4.4	67.7966	421.63	54.7945	706.59	31.4961	298.521	57.1429	361.22	100	321.27	59.7015	348.21
22.5178	80.3923	226.59	78.8463	205.579	66.129	200.59	95.349	253.02	67.2133	252.43	65.0794	302.27	74.5455	245.85	85.4167	205.35	85.4167	205.35	74.5455	278.09	82.0001	212.38	89.1307	207.534	38.6793	408.146		4.51	69.4915	394.83	56.1644	717.97	32.2835	303.532	58.5714	352.43			61.194	334.43
23.067	82.353	215.29	80.7694	217.478	67.7419	199.35	97.6745	253.05	68.8526	243.55	66.6667	261.83	76.3636	233.52	87.5	210.56	87.5	210.56	76.3636	272.16	84	215.32	91.3046	199.821	39.6227	353.936		4.62	71.1864	370.86	57.5342	638.83	33.0709	315.492	60	336.61			62.6866	327.53
23.6162	84.3138	214.96	82.6924	211.886	69.3548	194.09	100	255.08	70.4919	219.14	68.2539	254.61	78.1817	236.32	89.5832	207.82	89.5832	207.82	78.1817	260.06	86	213.01	93.4784	196.572	40.566	333.578		4.73	72.8814	356.13	58.9041	612.6	33.8583	299.005	61.4286	322.15			64.1791	322.29
24.1654	86.2745	220.22	84.6154	220.395	70.9676	205.08			72.1312	206.47	69.8412	238.99	79.9999	232.92	91.6665	204.54	91.6665	204.54	79.9999	250.98	87.9999	203.39	95.6523	198.734	41.5094	313.236		4.84	74.5763	341.9	60.274	538.38	34.6457	294.903	62.8571	315.09			65.6716	309.8
24.7146	88.2352	214.15	86.5384	222.284	72.5805	193.81			73.7705	211.46	71.4284	230.51	81.818	226.8	93.7498	204.53	93.7498	204.53	81.818	247.96	89.9999	194.08	97.8261	196.886	42.4528	291.765		4.95	76.2712	337.45	61.6438	521.98	35.4331	283.928	64.2857	300.99			67.1642	305.87
25.2638	90.196	208.13	88.4615	219.065	74.1933	198.61			75.4098	202.92	73.0157	221.85	83.6361	213.66	95.8331	202.13	95.8331	202.13	83.6361	226.4	91.9998	186.9	100	202.713	43.3961	282.944		5.06	77.9661	339.15	63.0137	538.25	36.2205	289.434	65.7143	281.29			68.6567	300.75
25.813	92.1567	214.8	90.3845	204.634	75.8062	194.82			77.0491	205.35	74.603	219.59	85.4543	205.9	97.9163	193.21	97.9163	193.21	85.4543	239.03	93.9998	189.02			44.3395	288.147		5.17	79.661	327.25	64.3836	505.53	37.0079	290.732	67.1429	271.4			70.1493	285.22
26.3623	94.1178	201.42	92.3079	186.965	77.4194	197.7			78.6887	195.11	76.1905	211.69	87.2727	204.28	100	191.51	100	191.51	87.2727	219.61	96.0001	181.94			45.2831	269.231		5.28	81.3559	331.39	65.7534	490.58	37.7953	294.909	68.5714	275.11			71.6418	276.94
26.9115	96.0785	193.07	94.2309	185.431	79.0322	194.9			80.328	186.27	77.7778	216.35	89.0909	208.91					89.0909	223.5	98.0001	181.81			46.2264	245.3		5.39	83.0508	332.14	67.1233	473.27	38.5827	299.334	70	283.75			73.1343	282.48
27.4607	98.0393	197.09	96.1539	180.481	80.6451	197.61			81.9673	185.98	79.365	214.92	90.909	204.03					90.909	234.64	100	183.79			47.1698	219.749		5.5	84.7458	330.23	68.4932	473.98	39.3701	295.559	71.4286	278.48			74.6269	271.13
28.0099	100	188.73	98.077	179.534	82.2579	187.8			83.6067	180.69	80.9523	190.82	92.7271	196.72					92.7271	246.72					48.1132	207.966		5.61	86.4407	322.33	69.863	463.7	40.1575	299.774	72.8571	258.15			76.1194	266.92
28.5591			100	172.303	83.8708	184.67			85.246	187.61	82.5396	189.55	94.5453	194.12					94.5453	243.83					49.0565	194.959		5.72	88.1356	302.15	71.2329	461.35	40.9449	290.422	74.2857	255.96			77.6119	259.51
29.1083					85.4837	189.73			86.8853	186.92	84.1268	190	96.3634	191.03					96.3634	261.75					49.9999	180.503		5.83	89.8305	292.19	72.6027	458.64	41.7323	308.97	75.7143	247.74			79.1045	255.17
29.6575					87.0965	185.53			88.5246	179.18	85.7141	191.71	98.1815	188.53					98.1815	236.49					50.9433	178.181		5.94	91.5254	295.73	73.9726	437.1	42.5197	306.171	77.1429	243.05			80.597	254.2
30.2068					88.7097	188.94			90.1642	176.28	87.3016	190.57	100	193.48					100	241.17					51.8868	183.36		6.05	93.2203	307.94	75.3425	427.67	43.3071	324.069	78.5714	244.33			82.0896	238.76
30.756					90.3225	193.42			91.8035	170.06	88.8889	187.58													52.8302	175.102		6.16	94.9153	306.69	76.7123	414.49	44.0945	321.728	80	242.19			83.5821	232.5
31.3052					91.9354	192.81			93.4428	182	90.4761	181.41													53.7736	182.031		6.27	96.6102	288.58	78.0822	407.03	44.8819	312.792	81.4286	234.79			85.0746	223.71
31.8544					93.5483	183.09			95.0821	174.45	92.0634	181.64													54.7169	177.989		6.38	98.3051	294.85	79.4521	386.71	45.6693	312.317	82.8571	234.99			86.5672	213.25
32.4036					95.1611	189.75			96.7214	168.86	93.6507	181.57													55.6603	164.812		6.49	100	297.33	80.8219	389.14	46.4567	294.488	84.2857	232.21			88.0597	217.51
32.9528					96.774	186.77			98.3607	177.33	95.2379	171.07													56.6037	157.895		6.6			82.1918	396.24	47.2441	294.447	85.7143	220.35			89.5522	218.97
33.502					98.3868	182.52			100	180.4	96.8252	177.35													57.5471	158.898		6.71			83.5616	411.45	48.0315	310.736	87.1429	217.54			91.0448	226.14
34.0513					100	185.33					98.4127	180.37													58.4906	157.118		6.82			84.9315	386.17	48.8189	307.014	88.5714	211.92			92.5373	226.15
34.6005											100	178.01													59.434	153.626		6.93			86.3014	369.05	49.6063	328.917	90	211.71			94.0299	228.95
35.1497																									60.3773	151.709		7.04			87.6712	371.23	50.3937	367.927	91.4286	216.36			95.5224	225.28
35.6989																									61.3207	150.063		7.15			89.0411	362.31	51.1811	383.427	92.8571	205.7			97.0149	229.8
36.2481																									62.2641	150.375		7.26			90.411	362.08	51.9685	363.856	94.2857	202.03			98.5075	223.03
36.7973																									63.2075	144.346		7.37			91.7808	353.9	52.7559	356.948	95.7143	197.94			100	227.72
37.3465																									64.1508	138.586		7.48			93.1507	342.1	53.5433	350.828	97.1429	199.51
37.8957																									65.0942	147.601		7.59			94.5205	337.48	54.3307	355.883	98.5714	216.66
38.445																									66.0378	140.88		7.7			95.8904	317.48	55.1181	370.949	100	215.09
38.9942																									66.9811	146.593		7.81			97.2603	299.3	55.9055	361.059
39.5434																									67.9245	148.285		7.92			98.6301	288.99	56.6929	354.091
40.0926																									68.8679	146.036		8.03			100	283.1	57.4803	358.084
40.6418																									69.8112	142.253		8.14					58.2677	358.414
41.191																									70.7546	140.254		8.25					59.0551	351.429
41.7402																									71.698	138.171		8.36					59.8425	364.832
42.2895																									72.6415	138.686		8.47					60.6299	372.969
42.8387																									73.5849	137.973		8.58					61.4173	391.057
43.3879																									74.5283	146.323		8.69					62.2047	433.64
43.9371																									75.4716	148.425		8.8					62.9921	441.546
44.4863																									76.415	146.457		8.91					63.7795	451.41
45.0355																									77.3584	142.912		9.02					64.5669	414.471
45.5847																									78.3018	152.579		9.13					65.3543	388.551
46.134																									79.2453	153.199		9.24					66.1417	364.408
46.6832																									80.1887	148.998		9.35					66.9291	326.136
47.2324																									81.132	139.959		9.46					67.7165	315.692
47.7816																									82.0754	143.932		9.57					68.5039	313.333
48.3308																									83.0188	140.057		9.68					69.2913	316.45
48.88																									83.9622	138.087		9.79					70.0787	309.464
49.4292																									84.9055	139.688		9.9					70.8661	310.104
49.9785																									85.8491	137.271		10.01					71.6535	313.509
50.5277																									86.7924	138.912		10.12					72.4409	303.49
51.0769																									87.7358	138.68		10.23					73.2283	332.29
51.6261																									88.6792	144.32		10.34					74.0157	330.242
52.1753																									89.6226	142.942		10.45					74.8031	366.038
52.7245																									90.5659	141.058		10.56					75.5906	370.407
53.2737																									91.5093	147.488		10.67					76.378	382.224
53.8229																									92.4527	140.986		10.78					77.1654	393.123
54.3722																									93.3962	139.021		10.89					77.9528	396.898
54.9214																									94.3396	141.292		11					78.7402	390.668
55.4706																									95.283	140.754		11.11					79.5276	411.123
56.0198																									96.2263	141.16		11.22					80.315	408.382
56.569																									97.1697	141.751		11.33					81.1024	393.651
57.1182																									98.1131	139.559		11.44					81.8898	372.285
57.6674																									99.0565	142.716		11.55					82.6772	387.474
58.2167																									100	145.674		11.66					83.4646	398.995
																												11.77					84.252	398.028
																												11.88					85.0394	375.685
																												11.99					85.8268	396.069
																												12.1					86.6142	388.826
																												12.21					87.4016	415.542
																												12.32					88.189	467.439
																												12.43					88.9764	522.953
																												12.54					89.7638	517.494
																												12.65					90.5512	430.53
																												12.76					91.3386	329.471
																												12.87					92.126	299.822
																												12.98					92.9134	298.506
																												13.09					93.7008	281.664
																												13.2					94.4882	273.706
																												13.31					95.2756	286.271
																												13.42					96.063	291.794
																												13.53					96.8504	294.39
																												13.64					97.6378	285.807
																												13.75					98.4252	278.188
																												13.86					99.2126	268.255
																												13.97					100	270.475
	0		0		0		0		0		0		0		0		0		0		0		0		0				0		0		0		0		0		0				Mean	STDDEV	SEM
	5	304.51	5	370.981	5	282.81	5	300.96	5	244.933	5	240.5	5	324.63	5	386.66	5	386.66	5	272.32	5	343.153	5	288.113	5	146.869			5	378.497	5	678.173	5	256.429	5	518.183	5	741.833	5	392.045		FISH	360.961	142.447	32.6796
	10	327.8	10	579.624	10	356.687	10	333.78	10	265.733	10	289.477	10	350.787	10	483.195	10	483.195	10	275.69	10	437.4	10	359.7	10	154.738			10	506.41	10	1394.15	10	376.667	10	574.312	10	1023.76	10	502.547			477.666	279.516	64.1255
	15	374.25	15	753.65	15	569.673	15	369.64	15	330.203	15	340.073	15	448.763	15	701.807	15	701.807	15	310.45	15	592.933	15	414.118	15	168.027			15	854.577	15	3404.46	15	1262.43	15	738.44	15	1498.2	15	837.955			772.182	699.828	160.552
	20	531.923	20	916.724	20	1003.71	20	475.655	20	646.217	20	507.463	20	778.835	20	1349.47	20	1349.47	20	362.575	20	1058.79	20	632.476	20	239.71			20	1479.7	20	4452.82	20	780.167	20	1039.16	20	2521.63	20	1765.2			1152.19	944.443	216.67
	25	955.395	25	975.416	25	1521.66	25	674.035	25	1220.69	25	840.983	25	1830.04	25	2446.29	25	2446.29	25	541.047	25	1525.02	25	1037.55	25	301.022			25	2330.78	25	3802.36	25	491.333	25	1442.73	25	3792.01	25	3673.22			1676.2	1091.51	250.409
	30	1597.95	30	977.031	30	1277.5	30	1173.52	30	1695.71	30	2028.65	30	2820.92	30	3312.04	30	3312.04	30	1073.41	30	1905.21	30	1161.95	30	413.179			30	2685.63	30	2063.11	30	334.496	30	2350.17	30	4152.43	30	4768.16			2058.06	1176.83	269.983
	35	1892.62	35	905.892	35	853.537	35	2018.87	35	1782.92	35	3946.84	35	3051.63	35	2700.65	35	2700.65	35	1588.02	35	1664.55	35	902.397	35	459.52			35	2790.67	35	1652.04	35	300.384	35	3575.6	35	3621.13	35	4376.75			2146.56	1176.41	269.886
	40	1611.15	40	935.513	40	573.107	40	2843.39	40	1355.53	40	3988.11	40	2686.9	40	1762.84	40	1762.84	40	1725.62	40	1301.44	40	670.958	40	394.904			40	2503.93	40	1381.92	40	292.316	40	3320.36	40	2789.57	40	3198.51			1847.31	1046.35	240.05
	45	1177.16	45	736.425	45	394.367	45	2953.97	45	1028.23	45	2521.65	45	2019.69	45	1003.31	45	1003.31	45	1424.51	45	1053.67	45	538.803	45	301.934			45	2027.85	45	1247.67	45	309.132	45	2151.4	45	2000.75	45	1660.47			1344.96	747.708	171.536
	50	750.883	50	722.665	50	290.745	50	2355.3	50	655.017	50	1648.26	50	1470.73	50	591.227	50	591.227	50	1091.6	50	713.717	50	441.682	50	219.618			50	1536.26	50	1033.62	50	307.986	50	1067.33	50	1325	50	707.307			922.114	534.746	122.679
	55	474.1	55	764.768	55	254.573	55	1470.56	55	421.817	55	1138.32	55	871.017	55	417.095	55	417.095	55	841.923	55	515.06	55	368.565	55	179.333			55	1097.6	55	782.33	55	363.145	55	585.358	55	903.83	55	498.263			650.776	330.007	75.7087
	60	358.16	60	514.34	60	242.22	60	756.09	60	294.147	60	659.747	60	526.48	60	357.06	60	357.06	60	622.59	60	357.583	60	334.923	60	158.47			60	741.027	60	656.467	60	359.837	60	357.643	60	699.187	60	385.43			459.919	175.587	40.2824
	65	297.613	65	418.839	65	212.617	65	501.705	65	259.097	65	384.953	65	394.953	65	321.147	65	321.147	65	469.81	65	265.915	65	308.479	65	147.016			65	556.41	65	526.035	65	417.516	65	318.71	65	574.603	65	328.083			369.718	114.608	26.2929
	70	259.975	70	265.399	70	198.01	70	385.423	70	252.413	70	264.425	70	309.457	70	266.36	70	266.36	70	372.55	70	231.685	70	253.615	70	145.275			70	418.717	70	475.382	70	337.428	70	277.888	70	489.043	70	305.473			303.941	87.2437	20.0151
	75	240.413	75	214.512	75	199.167	75	326.295	75	212.357	75	223.983	75	252.747	75	244.527	75	244.527	75	287.67	75	214.52	75	229.248	75	140.281			75	356.297	75	452.363	75	323.591	75	269.085	75	431.88	75	278.942			270.653	76.4019	17.5278
	80	227.095	80	205.02	80	195.807	80	297.385	80	201.127	80	214.32	80	234.253	80	231.635	80	231.635	80	261.067	80	209.827	80	226.762	80	148.714			80	334.617	80	408.975	80	390.741	80	244.327	80	392.33	80	260.533			258.746	71.0959	16.3105
	85	218.947	85	216.586	85	190.027	85	289.275	85	184.313	85	190.123	85	220.23	85	224.845	85	224.845	85	237.18	85	213.85	85	218.087	85	141.787			85	331.253	85	395.75	85	393.136	85	236.045	85	361.29	85	241.82			248.915	69.7474	16.0012
	90	217.185	90	220.674	90	188.067	90	270.13	90	184.57	90	189.953	90	206.363	90	207.91	90	207.91	90	227.38	90	203.493	90	209.213	90	140.425			90	305.557	90	367.53	90	440.573	90	215.38	90	347.247	90	218.36			240.417	72.1788	16.559
	95	208.117	95	192.343	95	189.773	95	256.665	95	176.113	95	181.54	95	198.29	95	204.535	95	204.535	95	241.73	95	187.96	95	198.197	95	141.969			95	303.453	95	348.89	95	318.95	95	208.95	95	338.003	95	227.08			227.742	57.0818	13.0955
	100	192.963	100	177.439	100	186.093	100	253.717	100	175.26	100	176.7	100	191.013	100	195.617	100	195.617	100	246.47	100	182.513	100	199.444	100	141.936			100	293.587	100	297.217	100	282.169	100	207.3	100	320.6	100	226.458			218.006	48.5839	11.1459

## Sheet: IF Binned
35	1	FISH	4	FISH	5	FISH	6	FISH	7	FISH	14	FISH	20A	FISH	20B	FISH	26	FISH	30	FISH	31	FISH	32	FISH	35	FISH	4	FISH	15	FISH	21	FISH	27	FISH	3	FISH	11A	FISH
X	X	Y	X	Y	X	Y	X	Y	X	Y	X	Y	X	Y	X	Y	X	Y	X	Y	X	Y	X	Y	X	Y	X	Y	X	Y	X	Y	X	Y	X	Y	X	Y
0	0	12560	0	10384	0	15120	0	22480	0	13856	0	36096	0	48736	0	61728	0	30160	0	20960	0	45520	0	24064	0	11616	0	10672	0	8208	0	5744	0	4592	0	10208	0	18688
0.11	2.27273	11827.2	2.5641	10049.1	2.5	14827.5	2.63158	21870	1.75439	13692	1.66667	33961.5	1.92308	52073.1	2.27273	65203.8	1.51515	29585.8	2.17391	21930	2.32558	44212.5	2.77778	23488	1	11035.8	2.32558	10250	1.88679	7321.49	2.22222	5739.67	2.27273	4817.1	2.63158	10611.4	1.63934	18349.8
0.22	4.54545	10158.7	5.12821	9425.78	5	13874.6	5.26316	19907.9	3.50877	12935.1	3.33333	29637.9	3.84615	53581.2	4.54545	65520	3.0303	28418	4.34783	20965.6	4.65116	42182.2	5.55556	20931.5	2	10970.6	4.65116	10373.3	3.77358	6653.27	4.44444	5600.87	4.54545	5044.81	5.26316	10160.5	3.27869	16908.2
0.33	6.81818	8840.01	7.69231	9348.62	7.5	12736.8	7.89474	18158.5	5.26316	11567	5	24308.7	5.76923	51881.5	6.81818	64016.9	4.54545	27026.4	6.52174	19448.8	6.97674	40758.3	8.33333	17754.6	3	10539.7	6.97674	10463.3	5.66038	6146.38	6.66667	5011.36	6.81818	5339.8	7.89474	9632.8	4.91803	15607.4
0.44	9.09091	7587.39	10.2564	9257.53	10	11497.8	10.5263	16590	7.01754	10491.3	6.66667	21457.6	7.69231	45646.1	9.09091	56643.8	6.06061	25572	8.69565	18768.9	9.30233	34654.9	11.1111	15836.8	4	9864.64	9.30233	9968.23	7.54717	5597.14	8.88889	4740.98	9.09091	4696.76	10.5263	9307.17	6.55738	14589.1
0.55	11.3636	6905.4	12.8205	8516.22	12.5	10639.7	13.1579	16196	8.77193	9828	8.33333	18717.4	9.61538	38031.6	11.3636	48508.9	7.57576	24778	10.8696	18739.9	11.6279	28670.5	13.8889	14908.3	5	9432.65	11.6279	9231.78	9.43396	6227.39	11.1111	5127.01	11.3636	4366.33	13.1579	8522.85	8.19672	13735.8
0.66	13.6364	6343.19	15.3846	8643.43	15	10733.9	15.7895	15992.7	10.5263	8578.99	10	17881	11.5385	31426.4	13.6364	46596.8	9.09091	22085.9	13.0435	20137.2	13.9535	22814.3	16.6667	15424.9	6	8787.79	13.9535	8700.31	11.3208	6960.68	13.3333	5443.78	13.6364	4736.73	15.7895	7991.4	9.83607	13434.8
0.77	15.9091	6057.92	17.9487	8711.72	17.5	11256.6	18.4211	15722.1	12.2807	8302.98	11.6667	18913.7	13.4615	28990.5	15.9091	48180.7	10.6061	19214.3	15.2174	20252.4	16.2791	19960.7	19.4444	16754.9	7	8820.92	16.2791	9186.98	13.2075	7510.05	15.5556	5637.32	15.9091	4672.48	18.4211	8515.12	11.4754	12890
0.88	18.1818	6401.67	20.5128	8277.83	20	12041.1	21.0526	15997.2	14.0351	8120.01	13.3333	19392	15.3846	29295.5	18.1818	51293.7	12.1212	16871	17.3913	21022.5	18.6047	18547.1	22.2222	18491	8	8423.34	18.6047	9278.06	15.0943	7512.1	17.7778	5478.62	18.1818	4771.13	21.0526	8381.34	13.1148	13001.7
0.99	20.4545	6603.85	23.0769	8555.69	22.5	12719.4	23.6842	17324.3	15.7895	8450.1	15	20645.4	17.3077	32353.7	20.4545	50297.5	13.6364	15191.5	19.5652	23886.8	20.9302	17726.4	25	19447.5	9	7617.4	20.9302	9399.91	16.9811	7812.21	20	6066.65	20.4545	5283.29	23.6842	7943.73	14.7541	13179.2
1.1	22.7273	6720.6	25.641	8751.3	25	13167.3	26.3158	18029.9	17.5439	8677.34	16.6667	20905.9	19.2308	34495.5	22.7273	49830.7	15.1515	14062.1	21.7391	28760.8	23.2558	17688.4	27.7778	17370.9	10	7388.92	23.2558	10196.5	18.8679	7712.14	22.2222	6414.22	22.7273	5564.42	26.3158	7861.24	16.3934	13116
1.21	25	6848.42	28.2051	9334.38	27.5	13055.2	28.9474	18898.5	19.2982	8919.42	18.3333	21955.1	21.1538	33905.9	25	45681	16.6667	12851.8	23.913	32473.3	25.5814	17989.1	30.5556	16625.5	11	7049.75	25.5814	10774.7	20.7547	7733.99	24.4444	5937.5	25	5772.79	28.9474	7385.56	18.0328	13789.8
1.32	27.2727	7240.93	30.7692	9929.77	30	13081.1	31.5789	19095.6	21.0526	9283.79	20	22516.2	23.0769	29995.9	27.2727	40296	18.1818	11848.9	26.087	29804.7	27.907	19544.5	33.3333	16750.9	12	7375.37	27.907	11137.6	22.6415	7263.25	26.6667	5101.53	27.2727	6349.24	31.5789	6852.68	19.6721	13813.3
1.43	29.5455	6757.25	33.3333	9933.61	32.5	12611.3	34.2105	18073.5	22.807	9082.27	21.6667	22486.1	25	28949.8	29.5455	35518.8	19.697	11727	28.2609	26049.2	30.2326	21695.9	36.1111	16821.2	13	7528.4	30.2326	11837.9	24.5283	7449.48	28.8889	4813.01	29.5455	6937.53	34.2105	6585.72	21.3115	13900.3
1.54	31.8182	6961.37	35.8974	9584.6	35	12198.7	36.8421	16616.7	24.5614	9323.61	23.3333	22757.7	26.9231	30879.2	31.8182	33378.6	21.2121	11371.2	30.4348	23354.8	32.5581	22909.3	38.8889	15145.6	14	8145.33	32.5581	11927.3	26.4151	7599.21	31.1111	4344.53	31.8182	6384.48	36.8421	6020.1	22.9508	12717.6
1.65	34.0909	6024.58	38.4615	9582.54	37.5	11460.9	39.4737	16350.7	26.3158	9578.89	25	22353.9	28.8462	33951.1	34.0909	32253.8	22.7273	11786	32.6087	22951.8	34.8837	24623.5	41.6667	13541.8	15	8118.19	34.8837	11139	28.3019	8014.09	33.3333	4461.89	34.0909	5553.47	39.4737	5569.58	24.5902	11835.7
1.76	36.3636	5700.83	41.0256	8894.51	40	10784.7	42.1053	15906.8	28.0702	10164.5	26.6667	22506.1	30.7692	33554.5	36.3636	31134.3	24.2424	12837	34.7826	23435.2	37.2093	24270.4	44.4444	13074.4	16	8321.83	37.2093	10940.1	30.1887	7737.03	35.5556	4448.35	36.3636	5191.03	42.1053	5626.48	26.2295	11064.7
1.87	38.6364	5644.67	43.5897	8380.79	42.5	10203.5	44.7368	16895.3	29.8246	9940.49	28.3333	22311	32.6923	31338.8	38.6364	29555.8	25.7576	12582.4	36.9565	22645.5	39.5349	22378.3	47.2222	13293	17	8262.39	39.5349	10347.1	32.0755	6944.85	37.7778	4878.4	38.6364	4869.1	44.7368	5775.51	27.8689	10669.2
1.98	40.9091	5267.4	46.1538	7820.33	45	9738.3	47.3684	17908.3	31.5789	9139.45	30	20563.2	34.6154	31840.4	40.9091	26855.6	27.2727	13717.4	39.1304	22217.1	41.8605	20548.5	50	13257.7	18	8197.99	41.8605	10128.2	33.9623	6303.57	40	4634.74	40.9091	5006.41	47.3684	5800.23	29.5082	10154.7
2.09	43.1818	5254.24	48.7179	7854.78	47.5	10585.7	50	20002.7	33.3333	9164.5	31.6667	20966.9	36.5385	32904	43.1818	24634.2	28.7879	15599.4	41.3043	22010.8	44.186	18318.1	52.7778	13609.2	19	7978.76	44.186	10088.6	35.8491	5546.26	42.2222	4626.41	43.1818	5247.77	50	5908.1	31.1475	9394.52
2.2	45.4545	5148.05	51.2821	8007.58	50	10151.7	52.6316	22481.5	35.0877	9050.24	33.3333	21909.2	38.4615	33175.2	45.4545	22867.2	30.303	14683.2	43.4783	21311.9	46.5116	16184.7	55.5556	13643.3	20	7750.36	46.5116	10285	37.7358	5021.91	44.4444	4468.22	45.4545	5740.69	52.6316	6174.56	32.7869	9358.44
2.31	47.7273	5541.29	53.8462	7840.04	52.5	10088.1	55.2632	22840	36.8421	9062.01	35	22693.7	40.3846	30034.6	47.7273	21199.4	31.8182	14946.9	45.6522	20197	48.8372	15726.6	58.3333	13804.7	21	8066.94	48.8372	10959.5	39.6226	4729.15	46.6667	4472.39	47.7273	5689.99	55.2632	6185.25	34.4262	9160.11
2.42	50	5427.88	56.4103	8017.85	55	10295.3	57.8947	20629	38.5965	9181.01	36.6667	21471	42.3077	26993.3	50	21551.8	33.3333	16626.1	47.8261	19341.2	51.1628	15827.8	61.1111	13905.5	22	8194.12	51.1628	11655.1	41.5094	4389.67	48.8889	4645.34	50	4962.62	57.8947	6525.56	36.0656	8765.51
2.53	52.2727	5342.26	58.9744	7955.55	57.5	10463.8	60.5263	19079.8	40.3509	9265.16	38.3333	20391.3	44.2308	24605.9	52.2727	23170.9	34.8485	18322.9	50	19314	53.4884	16746.7	63.8889	13421.1	23	8210.38	53.4884	11605	43.3962	4821.36	51.1111	4557.03	52.2727	4720.8	60.5263	7195.58	37.7049	8512.45
2.64	54.5455	5702.66	61.5385	8798.78	60	10446.1	63.1579	17894	42.1053	9432.33	40	18914.6	46.1538	24379.8	54.5455	27309.2	36.3636	19106.5	52.1739	19691.3	55.814	20205	66.6667	12994	24	8393.15	55.814	11727.6	45.283	4725.76	53.3333	4865.67	54.5455	4930.75	63.1579	7611.56	39.3443	8807.24
2.75	56.8182	6147.27	64.1026	9041.72	62.5	10365.1	65.7895	17088.7	43.8596	8577.19	41.6667	16990.4	48.0769	23368.1	56.8182	30703.4	37.8788	18479.1	54.3478	19842	58.1395	23883.2	69.4444	12570	25	9291.5	58.1395	11343.1	47.1698	4479.76	55.5556	5350.24	56.8182	4750.31	65.7895	7521.56	40.9836	8615.06
2.86	59.0909	6176.55	66.6667	8682.1	65	10242.9	68.4211	17355.4	45.614	7790.96	43.3333	15403.4	50	23068.7	59.0909	34322.9	39.3939	16552.2	56.5217	20438.5	60.4651	26892.1	72.2222	11763.1	26	9902.61	60.4651	10317.5	49.0566	4904.19	57.7778	5573.31	59.0909	4987.32	68.4211	7062.77	42.623	8431.3
2.97	61.3636	6407.68	69.2308	8727.92	67.5	11088.6	71.0526	18716.3	47.3684	7658.4	45	14767.7	51.9231	25429.5	61.3636	36280	40.9091	14180.3	58.6957	23257.2	62.7907	27982.9	75	11068.6	27	10409.1	62.7907	9708.39	50.9434	5300.75	60	5552.64	61.3636	5590.97	71.0526	6417.15	44.2623	8322.72
3.08	63.6364	6882.31	71.7949	8202.25	70	11318.5	73.6842	20697.8	49.1228	7583.81	46.6667	15677.3	53.8462	30524.6	63.6364	36519.7	42.4242	11812	60.8696	24682.4	65.1163	26809.1	77.7778	11284.8	28	10059.4	65.1163	9173.69	52.8302	5540.18	62.2222	5608.45	63.6364	5983.58	73.6842	5997.68	45.9016	8390.03
3.19	65.9091	5919.63	74.359	8229.27	72.5	11627	76.3158	21610.7	50.8772	7053.54	48.3333	16175.1	55.7692	34877.9	65.9091	34132.4	43.9394	10631.8	63.0435	26851.1	67.4419	24068.8	80.5556	11057.6	29	11159.5	67.4419	8965	54.717	5614.08	64.4444	5682.98	65.9091	5822.87	76.3158	5564.79	47.541	8326.44
3.3	68.1818	5904.68	76.9231	8040.49	75	11039.9	78.9474	21599.8	52.6316	6876.37	50	16908	57.6923	37363.1	68.1818	32650.3	45.4545	10470.3	65.2174	29169.8	69.7674	20337.5	83.3333	11061.1	30	11081.9	69.7674	8988.88	56.6038	5358.85	66.6667	5511.9	68.1818	5531.83	78.9474	5787.19	49.1803	8278.24
3.41	70.4545	5600.25	79.4872	7808.15	77.5	10265.1	81.5789	20505.9	54.386	6927.31	51.6667	17351.6	59.6154	37243.2	70.4545	31249.6	46.9697	9578.85	67.3913	28103.1	72.093	17460.8	86.1111	11455.2	31	9768.97	72.093	9043.58	58.4906	4994.34	68.8889	5409.14	70.4545	5036.43	81.5789	5485.21	50.8197	8338.15
3.52	72.7273	5948.38	82.0513	7891.4	80	9598.97	84.2105	18705.6	56.1404	6835.38	53.3333	17363.8	61.5385	34884.1	72.7273	32083.1	48.4848	8976.01	69.5652	24922.1	74.4186	15360.3	88.8889	12084.1	32	9105.52	74.4186	9201.36	60.3774	5437.43	71.1111	5546.99	72.7273	4499.86	84.2105	5607.72	52.459	8649.64
3.63	75	5406.68	84.6154	7328.24	82.5	9389.15	86.8421	17290.8	57.8947	7093.33	55	16170.5	63.4615	31846.7	75	31216.2	50	8875.6	71.7391	22237.3	76.7442	14105.7	91.6667	12968.3	33	9194.68	76.7442	9820.38	62.2642	6160.42	73.3333	5118.61	75	4407.79	86.8421	5873.29	54.0984	8653.88
3.74	77.2727	5643.94	87.1795	7532.69	85	9615.07	89.4737	16512.2	59.6491	7016.07	56.6667	14511.4	65.3846	28516.1	77.2727	30146.6	51.5152	8861.46	73.913	21447.2	79.0698	13297.8	94.4444	12799.8	34	9956.21	79.0698	9950.91	64.1509	6137	75.5556	4809.29	77.2727	4895.9	89.4737	5734.08	55.7377	8597.47
3.85	79.5455	5629.93	89.7436	7809.96	87.5	9879.27	92.1053	17723.1	61.4035	7271.93	58.3333	14530.2	67.3077	26417	79.5455	26996.3	53.0303	8903.6	76.087	20480.4	81.3953	12848.6	97.2222	12212.8	35	11240.6	81.3953	10357.5	66.0377	6186.87	77.7778	4659.21	79.5455	4996.84	92.1053	6203.96	57.377	9306.84
3.96	81.8182	5893.9	92.3077	8179.07	90	9974.86	94.7368	19777.7	63.1579	7027.63	60	14802.6	69.2308	24379.3	81.8182	25689.6	54.5455	9128.83	78.2609	19562.7	83.7209	12576.8	100	11662.9	36	12632	83.7209	10480.6	67.9245	5628.88	80	4829.82	81.8182	5134.52	94.7368	6834.68	59.0164	9462.74
4.07	84.0909	5478.92	94.8718	8490.79	92.5	9757.39	97.3684	20825	64.9123	7301	61.6667	15115.9	71.1538	23476.7	84.0909	24716.5	56.0606	9261.22	80.4348	18805.1	86.0465	11879.9			37	12905.6	86.0465	10724	69.8113	5124.81	82.2222	4942.59	84.0909	4968.86	97.3684	7139.16	60.6557	9582.51
4.18	86.3636	5679.01	97.4359	7949.56	95	9356.21	100	20407.1	66.6667	7569.51	63.3333	17296.1	73.0769	23675.7	86.3636	24630.9	57.5758	9241.03	82.6087	17955.9	88.3721	11162.3			38	11558.2	88.3721	10393.3	71.6981	5467.54	84.4444	4838.13	86.3636	4533.78	100	6952.4	62.2951	9918.58
4.29	88.6364	5875.83	100	7465.89	97.5	8806.29			68.4211	7703.49	65	20363	75	25483.6	88.6364	26337.9	59.0909	9198.66	84.7826	17517.6	90.6977	10812.4			39	11537.2	90.6977	10559.8	73.5849	5965.75	86.6667	5126.12	88.6364	4450.31			63.9344	10203.6
4.4	90.9091	5709.31			100	8856.22			70.1754	8078.88	66.6667	22235.3	76.9231	24989	90.9091	28879.3	60.6061	9421.81	86.9565	16875.3	93.0233	10393.1			40	10845.1	93.0233	11569.1	75.4717	6661.56	88.8889	5246.07	90.9091	4578.95			65.5738	10578.9
4.51	93.1818	5563.39							71.9298	8273.64	68.3333	20021.1	78.8462	22810.3	93.1818	30869.5	62.1212	9277.55	89.1304	16598.2	95.3488	9962.07			41	11586.3	95.3488	12444.5	77.3585	6238.59	91.1111	4851.72	93.1818	4266.73			67.2131	10060.4
4.62	95.4545	5691.66							73.6842	8446.16	70	16947	80.7692	20890.6	95.4545	31489	63.6364	9169.01	91.3043	16165.2	97.6744	10054.3			42	12499.3	97.6744	12128.1	79.2453	6014.1	93.3333	5065.46	95.4545	4279.17			68.8525	10446.4
4.73	97.7273	6097.1							75.4386	8222.4	71.6667	15162.2	82.6923	20378.3	97.7273	32155.4	65.1515	8801.36	93.4783	15032.2	100	9966.35			43	12994.4	100	11336.7	81.1321	5590.08	95.5556	5348.9	97.7273	4834.75			70.4918	10222.5
4.84	100	6280.21							77.193	7873.99	73.3333	15832	84.6154	20577.2	100	27706.7	66.6667	8368.1	95.6522	14857.5					44	12089.9			83.0189	5423.76	97.7778	5633.11	100	5013.75			72.1311	9621.34
4.95									78.9474	7767.92	75	15533.3	86.5385	22001.7			68.1818	7971.96	97.8261	14776.8					45	10873.3			84.9057	5080.72	100	5858.23					73.7705	9392.24
5.06									80.7018	7528.68	76.6667	15133.3	88.4615	22037.7			69.697	8592.29	100	14420.7					46	9632.51			86.7925	5451.95							75.4098	9343.08
5.17									82.4561	7026.43	78.3333	14897.4	90.3846	21662.6			71.2121	8461.33							47	8657.33			88.6792	5686.11							77.0492	9094.81
5.28									84.2105	7038.69	80	14441.5	92.3077	21568.4			72.7273	8273.54							48	8435.62			90.566	5403.25							78.6885	8832.68
5.39									85.9649	7028.41	81.6667	12621.2	94.2308	21797.8			74.2424	8049.31							49	8280.78			92.4528	5052.53							80.3279	8481.23
5.5									87.7193	7451.26	83.3333	11648.2	96.1538	22225.5			75.7576	8793.09							50	7991.69			94.3396	4961.91							81.9672	8208.39
5.61									89.4737	7969.35	85	10688.2	98.0769	22564.2			77.2727	7997.79							51	7784.54			96.2264	4822.82							83.6066	8131.58
5.72									91.2281	7702.82	86.6667	10306.8	100	22342.2			78.7879	8085.41							52	7492.11			98.1132	4650.36							85.2459	7795.59
5.83									92.9825	7040.54	88.3333	10658.9					80.303	7710.19							53	7307.23			100	4448.67							86.8852	7756.57
5.94									94.7368	6823.5	90	11769.1					81.8182	8031.97							54	7982.38											88.5246	7733.3
6.05									96.4912	6350.76	91.6667	12682.5					83.3333	7913.73							55	7961.83											90.1639	7455.94
6.16									98.2456	5855.94	93.3333	13493.5					84.8485	7894.44							56	7300.19											91.8033	7542.09
6.27									100	6293.81	95	14381.8					86.3636	7350.71							57	7354.18											93.4426	7955.95
6.38											96.6667	15305.5					87.8788	6948.08							58	7689.35											95.082	8066.54
6.49											98.3333	15990.7					89.3939	6762.73							59	7654.41											96.7213	7888.75
6.6											100	13533.2					90.9091	6505.57							60	7032.27											98.3607	7326.72
6.71																	92.4242	6430.46							61	7071.86											100	6668.45
6.82																	93.9394	6576.99							62	7016.41
6.93																	95.4545	7066.34							63	7021.02
7.04																	96.9697	6788.65							64	7272.26
7.15																	98.4848	6672.3							65	7013.66
7.26																	100	6600.24							66	6892.66
7.37																									67	7051.27
7.48																									68	6519.18
7.59																									69	6397.8
7.7																									70	6492.01
7.81																									71	6744.25
7.92																									72	7008.83
8.03																									73	6585.87
8.14																									74	6554.27
8.25																									75	6660.17
8.36																									76	6926.69
8.47																									77	7269.42
8.58																									78	7192.3
8.69																									79	7071.16
8.8																									80	7021.23
8.91																									81	6558.16
9.02																									82	6759.33
9.13																									83	6778.73
9.24																									84	6821.13
9.35																									85	6403.7
9.46																									86	6084.31
9.57																									87	6375.81
9.68																									88	6372.02
9.79																									89	6343.09
9.9																									90	6077.51
10.01																									91	5689.9
10.12																									92	5557.54
10.23																									93	5145.52
10.34																									94	5382.14
10.45																									95	5469.22
10.56																									96	5349.48
10.67																									97	5746.13
10.78																									98	5614.32
10.89																									99	5522.48
11																									100	5259.18
	0		0		0		0		0		0		0		0		0		0		0		0		0		0		0		0		0		0		0				Mean	STDDEV	SEM
	5	11515.3	5	10216.6	5	14607.4	5	22175	5	13494.4	5	31001	5	51463.4	5	64150.6	5	28797.5	5	21285.2	5	43971.6	5	23776	5	10576.6	5	10431.8	5	7394.25	5	5694.85	5	4817.97	5	10409.7	5	17388.4		IF	21219.3	15922.4	3652.86
	10	8213.7	10	9387.2	10	12703.1	10	19033.2	10	10628.8	10	20591.2	10	45186.4	10	60330.3	10	24145.3	10	19108.9	10	37706.6	10	19343	10	8411.84	10	10215.7	10	5990.3	10	4876.17	10	5018.28	10	9896.65	10	13919.9			18142.4	14399.7	3303.52
	15	6624.3	15	8886.88	15	10957.1	15	16393	15	8333.99	15	19208	15	30208.5	15	47552.9	15	17092.3	15	19438.6	15	25742.4	15	15372.6	15	7600.99	15	8966.05	15	7235.36	15	5285.4	15	4551.53	15	8915.01	15	13023.6			14809.9	10295.1	2361.86
	20	6229.8	20	8677.58	20	11343.9	20	15857.4	20	8682.29	20	21505.6	20	32048.3	20	49737.2	20	12622.4	20	21720.6	20	19253.9	20	16089.9	20	8104.92	20	9232.52	20	7678.82	20	5727.53	20	4721.81	20	8253.26	20	13573			14792.7	10646	2442.36
	25	6724.29	25	8416.76	25	12642.6	25	16660.8	25	9229.89	25	22528.5	25	30950.5	25	48603.1	25	11998.1	25	30617	25	17707.4	25	18969.3	25	8317.74	25	9798.22	25	7482.24	25	6139.46	25	5540.17	25	8162.53	25	12817.9			15437.2	10794.2	2476.37
	30	6948.87	30	9042.84	30	13101.2	30	18464.2	30	9894.64	30	21933.6	30	31260.1	30	40498.6	30	13966.4	30	27927	30	18766.8	30	18409.2	30	10317.3	30	10956.1	30	7806.65	30	4957.27	30	6353.19	30	7623.4	30	10629.5			15203	9282.1	2129.46
	35	6492.98	35	9931.69	35	12630.4	35	18584.6	35	9151.98	35	21533.2	35	32244.6	35	32816.2	35	16144.8	35	23247.3	35	23076.2	35	16688.2	35	10058	35	11634.7	35	6995.15	35	4403.21	35	5968.98	35	6719.2	35	9304.36			14611.9	8389.92	1924.78
	40	5672.75	40	9583.57	40	11481.4	40	16483.7	40	9097.75	40	20867.6	40	33039.6	40	30345	40	18045.9	40	22431.3	40	23324.4	40	15983.4	40	11786.4	40	10643.6	40	5099.11	40	4653.83	40	5030.07	40	5794.84	40	8695.07			14108.4	8394.87	1925.91
	45	5260.82	45	8637.65	45	10242.2	45	16401	45	9091.56	45	16519	45	27211.3	45	25744.9	45	12208	45	21661.4	45	19433.3	45	13308.1	45	11814.7	45	10108.4	45	4605.51	45	4576.46	45	5127.09	45	5700.99	45	8456.36			12426.8	6836.93	1568.5
	50	5372.41	50	7837.56	50	10158.6	50	18955.5	50	7677.72	50	15882	50	23605.6	50	21872.8	50	9475.19	50	19617.4	50	15955.6	50	13275.4	50	8978.55	50	10622.2	50	4703.24	50	4558.86	50	5464.43	50	5854.16	50	8331.57			11484.1	5934.44	1361.45
	55	5490.93	55	7923.81	55	10178.3	55	21242.1	55	6952.41	55	16948.5	55	26341	55	24010.6	55	8942.37	55	19615.7	55	16287.2	55	13433.5	55	7753.3	55	11630	55	5485	55	4711.35	55	4871.39	55	6041.33	55	8547.22			11916.1	6677.68	1531.97
	60	6161.91	60	7986.7	60	10401.7	60	21734.5	60	6981.59	60	15003.7	60	36494.8	60	32513.2	60	9233.64	60	21847.9	60	22044.1	60	13724	60	7498.71	60	11535.4	60	5176.6	60	5492.06	60	4868.82	60	6355.41	60	9122.35			13377.7	9105.54	2088.95
	65	6645	65	8920.25	65	10351.4	65	18486.9	65	7200.19	65	16894.4	65	33365.4	65	36399.8	65	9289.46	65	25766.7	65	27437.5	65	13663.3	65	7071.25	65	10013	65	5911.62	65	5614.69	65	5787.27	65	7403.57	65	9901.57			14006.5	9496.41	2178.63
	70	5912.16	70	8705.01	70	10883.3	70	17222	70	7636.5	70	19891.6	70	26437.5	70	33391.4	70	8433.43	70	27398.4	70	23738.5	70	12782	70	6727.76	70	9042.52	70	5646.85	70	5460.52	70	5677.35	70	7292.17	70	10361.9			13296.9	8474.59	1944.2
	75	5651.77	75	8215.76	75	11328.5	75	19707.1	75	8266.23	75	15868.6	75	24212	75	31516.3	75	8261.39	75	21842.2	75	16410.6	75	11415.9	75	6674.23	75	9122.47	75	5716.65	75	5332.8	75	4648.03	75	6207.41	75	9745.36			12112.8	7316.39	1678.49
	80	5560.18	80	7924.32	80	10301.3	80	21605.2	80	7954.77	80	15001.4	80	24427.6	80	29453	80	8292.1	80	20021.6	80	13701.8	80	11176.7	80	7023.49	80	9885.65	80	6304.75	80	4766.11	80	4766.84	80	5675.99	80	9090.19			11733.3	7006.58	1607.42
	85	5686.41	85	7609.82	85	9534.4	85	19605.8	85	7197.93	85	12349.8	85	20615.4	85	25203	85	7887.58	85	18092.9	85	12712.7	85	11059.4	85	6723.71	85	10419	85	5364.85	85	4870.18	85	5051.69	85	5546.47	85	8273.73			10726.6	5841.85	1340.21
	90	5777.42	90	7671.32	90	9823.07	90	16901.5	90	7483.01	90	10855.7	90	22019.7	90	25484.4	90	7020.51	90	16736.7	90	11521.1	90	11769.6	90	6276.07	90	10558.7	90	5569.03	90	5186.09	90	4492.05	90	5803.68	90	7761.82			10458.5	5748.58	1318.81
	95	5636.35	95	8334.93	95	9696.15	95	18750.4	95	7188.95	95	13081.7	95	21676.3	95	29874.4	95	6504.34	95	15598.7	95	10602.7	95	12884	95	5553.64	95	11064.5	95	5139.23	95	4958.59	95	4422.84	95	6519.32	95	7651.33			10796.8	6513.42	1494.28
	100	6022.99	100	7707.73	100	9006.24	100	20616.1	100	6166.84	100	14802.8	100	22377.3	100	30450.4	100	6781.88	100	14685	100	9994.23	100	11937.8	100	5493.47	100	11969.8	100	4640.62	100	5613.41	100	4709.22	100	7045.78	100	7487.62			10921.5	6801.88	1560.46

## Sheet: IF Normalised
	0		0		0		0		0		0		0		0		0		0		0		0		0		0		0		0		0		0		0				Mean	STDDEV	SEM
	5	11515.3	5	10216.6	5	14607.4	5	22175	5	13494.4	5	31001	5	51463.4	5	64150.6	5	28797.5	5	21285.2	5	43971.6	5	23776	5	10576.6	5	10431.8	5	7394.25	5	5694.85	5	4817.97	5	10409.7	5	17388.4		IF	21219.3	15922.4	3652.86
	10	8213.7	10	9387.2	10	12703.1	10	19033.2	10	10628.8	10	20591.2	10	45186.4	10	60330.3	10	24145.3	10	19108.9	10	37706.6	10	19343	10	8411.84	10	10215.7	10	5990.3	10	4876.17	10	5018.28	10	9896.65	10	13919.9			18142.4	14399.7	3303.52
	15	6624.3	15	8886.88	15	10957.1	15	16393	15	8333.99	15	19208	15	30208.5	15	47552.9	15	17092.3	15	19438.6	15	25742.4	15	15372.6	15	7600.99	15	8966.05	15	7235.36	15	5285.4	15	4551.53	15	8915.01	15	13023.6			14809.9	10295.1	2361.86
	20	6229.8	20	8677.58	20	11343.9	20	15857.4	20	8682.29	20	21505.6	20	32048.3	20	49737.2	20	12622.4	20	21720.6	20	19253.9	20	16089.9	20	8104.92	20	9232.52	20	7678.82	20	5727.53	20	4721.81	20	8253.26	20	13573			14792.7	10646	2442.36
	25	6724.29	25	8416.76	25	12642.6	25	16660.8	25	9229.89	25	22528.5	25	30950.5	25	48603.1	25	11998.1	25	30617	25	17707.4	25	18969.3	25	8317.74	25	9798.22	25	7482.24	25	6139.46	25	5540.17	25	8162.53	25	12817.9			15437.2	10794.2	2476.37
	30	6948.87	30	9042.84	30	13101.2	30	18464.2	30	9894.64	30	21933.6	30	31260.1	30	40498.6	30	13966.4	30	27927	30	18766.8	30	18409.2	30	10317.3	30	10956.1	30	7806.65	30	4957.27	30	6353.19	30	7623.4	30	10629.5			15203	9282.1	2129.46
	35	6492.98	35	9931.69	35	12630.4	35	18584.6	35	9151.98	35	21533.2	35	32244.6	35	32816.2	35	16144.8	35	23247.3	35	23076.2	35	16688.2	35	10058	35	11634.7	35	6995.15	35	4403.21	35	5968.98	35	6719.2	35	9304.36			14611.9	8389.92	1924.78
	40	5672.75	40	9583.57	40	11481.4	40	16483.7	40	9097.75	40	20867.6	40	33039.6	40	30345	40	18045.9	40	22431.3	40	23324.4	40	15983.4	40	11786.4	40	10643.6	40	5099.11	40	4653.83	40	5030.07	40	5794.84	40	8695.07			14108.4	8394.87	1925.91
	45	5260.82	45	8637.65	45	10242.2	45	16401	45	9091.56	45	16519	45	27211.3	45	25744.9	45	12208	45	21661.4	45	19433.3	45	13308.1	45	11814.7	45	10108.4	45	4605.51	45	4576.46	45	5127.09	45	5700.99	45	8456.36			12426.8	6836.93	1568.5
	50	5372.41	50	7837.56	50	10158.6	50	18955.5	50	7677.72	50	15882	50	23605.6	50	21872.8	50	9475.19	50	19617.4	50	15955.6	50	13275.4	50	8978.55	50	10622.2	50	4703.24	50	4558.86	50	5464.43	50	5854.16	50	8331.57			11484.1	5934.44	1361.45
	55	5490.93	55	7923.81	55	10178.3	55	21242.1	55	6952.41	55	16948.5	55	26341	55	24010.6	55	8942.37	55	19615.7	55	16287.2	55	13433.5	55	7753.3	55	11630	55	5485	55	4711.35	55	4871.39	55	6041.33	55	8547.22			11916.1	6677.68	1531.97
	60	6161.91	60	7986.7	60	10401.7	60	21734.5	60	6981.59	60	15003.7	60	36494.8	60	32513.2	60	9233.64	60	21847.9	60	22044.1	60	13724	60	7498.71	60	11535.4	60	5176.6	60	5492.06	60	4868.82	60	6355.41	60	9122.35			13377.7	9105.54	2088.95
	65	6645	65	8920.25	65	10351.4	65	18486.9	65	7200.19	65	16894.4	65	33365.4	65	36399.8	65	9289.46	65	25766.7	65	27437.5	65	13663.3	65	7071.25	65	10013	65	5911.62	65	5614.69	65	5787.27	65	7403.57	65	9901.57			14006.5	9496.41	2178.63
	70	5912.16	70	8705.01	70	10883.3	70	17222	70	7636.5	70	19891.6	70	26437.5	70	33391.4	70	8433.43	70	27398.4	70	23738.5	70	12782	70	6727.76	70	9042.52	70	5646.85	70	5460.52	70	5677.35	70	7292.17	70	10361.9			13296.9	8474.59	1944.2
	75	5651.77	75	8215.76	75	11328.5	75	19707.1	75	8266.23	75	15868.6	75	24212	75	31516.3	75	8261.39	75	21842.2	75	16410.6	75	11415.9	75	6674.23	75	9122.47	75	5716.65	75	5332.8	75	4648.03	75	6207.41	75	9745.36			12112.8	7316.39	1678.49
	80	5560.18	80	7924.32	80	10301.3	80	21605.2	80	7954.77	80	15001.4	80	24427.6	80	29453	80	8292.1	80	20021.6	80	13701.8	80	11176.7	80	7023.49	80	9885.65	80	6304.75	80	4766.11	80	4766.84	80	5675.99	80	9090.19			11733.3	7006.58	1607.42
	85	5686.41	85	7609.82	85	9534.4	85	19605.8	85	7197.93	85	12349.8	85	20615.4	85	25203	85	7887.58	85	18092.9	85	12712.7	85	11059.4	85	6723.71	85	10419	85	5364.85	85	4870.18	85	5051.69	85	5546.47	85	8273.73			10726.6	5841.85	1340.21
	90	5777.42	90	7671.32	90	9823.07	90	16901.5	90	7483.01	90	10855.7	90	22019.7	90	25484.4	90	7020.51	90	16736.7	90	11521.1	90	11769.6	90	6276.07	90	10558.7	90	5569.03	90	5186.09	90	4492.05	90	5803.68	90	7761.82			10458.5	5748.58	1318.81
	95	5636.35	95	8334.93	95	9696.15	95	18750.4	95	7188.95	95	13081.7	95	21676.3	95	29874.4	95	6504.34	95	15598.7	95	10602.7	95	12884	95	5553.64	95	11064.5	95	5139.23	95	4958.59	95	4422.84	95	6519.32	95	7651.33			10796.8	6513.42	1494.28
	100	6022.99	100	7707.73	100	9006.24	100	20616.1	100	6166.84	100	14802.8	100	22377.3	100	30450.4	100	6781.88	100	14685	100	9994.23	100	11937.8	100	5493.47	100	11969.8	100	4640.62	100	5613.41	100	4709.22	100	7045.78	100	7487.62			10921.5	6801.88	1560.46
	0		0		0		0		0		0		0		0		0		0		0		0		0		0		0		0		0		0		0				Mean	STDDEV	SEM
	5	1	5	1	5	1	5	1	5	1	5	1	5	1	5	1	5	1	5	1	5	1	5	1	5	1	5	1	5	1	5	1	5	1	5	1	5	1		IF	1	0	0
	10	0.713286	10	0.918822	10	0.869635	10	0.858318	10	0.787648	10	0.664209	10	0.878029	10	0.940448	10	0.838451	10	0.897753	10	0.857522	10	0.813553	10	0.795328	10	0.979291	10	0.81013	10	0.856243	10	1.04158	10	0.950713	10	0.80053			0.856394	0.0873294	0.0200347
	15	0.57526	15	0.86985	15	0.750111	15	0.739256	15	0.617591	15	0.619593	15	0.586989	15	0.741269	15	0.593533	15	0.913243	15	0.585432	15	0.646558	15	0.718664	15	0.859494	15	0.978512	15	0.928101	15	0.944699	15	0.856413	15	0.748985			0.75124	0.134012	0.0307445
	20	0.541002	20	0.849364	20	0.776586	20	0.715104	20	0.643402	20	0.693707	20	0.622738	20	0.77532	20	0.438317	20	1.02045	20	0.437871	20	0.67673	20	0.766309	20	0.885038	20	1.03848	20	1.00574	20	0.98004	20	0.792842	20	0.78058			0.75998	0.174847	0.0401125
	25	0.583944	25	0.823835	25	0.865494	25	0.751331	25	0.683982	25	0.726702	25	0.601409	25	0.757641	25	0.416635	25	1.43842	25	0.402701	25	0.797832	25	0.786431	25	0.939267	25	1.0119	25	1.07807	25	1.1499	25	0.784127	25	0.737153			0.807198	0.239936	0.0550452
	30	0.603446	30	0.885116	30	0.896891	30	0.83266	30	0.733243	30	0.707511	30	0.607423	30	0.631305	30	0.484985	30	1.31204	30	0.426794	30	0.774276	30	0.975491	30	1.05027	30	1.05577	30	0.870483	30	1.31864	30	0.732335	30	0.611302			0.816315	0.24107	0.0553054
	35	0.563856	35	0.972117	35	0.864659	35	0.838086	35	0.678208	35	0.694597	35	0.626553	35	0.511549	35	0.56063	35	1.09218	35	0.524799	35	0.701892	35	0.950968	35	1.11532	35	0.946025	35	0.773192	35	1.2389	35	0.645474	35	0.535091			0.780742	0.215477	0.0494339
	40	0.492627	40	0.938043	40	0.786003	40	0.743346	40	0.67419	40	0.673127	40	0.642002	40	0.473028	40	0.626647	40	1.05384	40	0.530442	40	0.67225	40	1.11439	40	1.0203	40	0.689604	40	0.8172	40	1.04402	40	0.556676	40	0.500051			0.739358	0.200384	0.0459712
	45	0.456855	45	0.845456	45	0.701165	45	0.739619	45	0.673731	45	0.532854	45	0.52875	45	0.40132	45	0.423926	45	1.01767	45	0.441951	45	0.559729	45	1.11707	45	0.969003	45	0.622851	45	0.803614	45	1.06416	45	0.547661	45	0.486323			0.680721	0.223586	0.0512941
	50	0.466545	50	0.767143	50	0.695441	50	0.854815	50	0.568958	50	0.512307	50	0.458686	50	0.340961	50	0.329028	50	0.921644	50	0.362863	50	0.558352	50	0.848909	50	1.01826	50	0.636066	50	0.800525	50	1.13418	50	0.562375	50	0.479146			0.648221	0.227799	0.0522607
	55	0.476838	55	0.775585	55	0.696796	55	0.957931	55	0.515209	55	0.546707	55	0.511838	55	0.374285	55	0.310525	55	0.921566	55	0.370404	55	0.565	55	0.733064	55	1.11487	55	0.741793	55	0.827301	55	1.01109	55	0.580355	55	0.491549			0.65909	0.225101	0.0516417
	60	0.535106	60	0.781741	60	0.712089	60	0.980136	60	0.517372	60	0.483973	60	0.70914	60	0.506826	60	0.32064	60	1.02643	60	0.501327	60	0.577221	60	0.708992	60	1.10579	60	0.700084	60	0.964392	60	1.01055	60	0.610527	60	0.524624			0.698788	0.218218	0.0500626
	65	0.577058	65	0.873117	65	0.708642	65	0.833684	65	0.53357	65	0.544963	65	0.648332	65	0.567412	65	0.322578	65	1.21055	65	0.623983	65	0.574669	65	0.668577	65	0.959851	65	0.799488	65	0.985925	65	1.20119	65	0.711218	65	0.569437			0.732328	0.225747	0.0517898
	70	0.513417	70	0.852049	70	0.745058	70	0.776642	70	0.565904	70	0.641643	70	0.513714	70	0.520516	70	0.292852	70	1.2872	70	0.53986	70	0.537601	70	0.636101	70	0.866825	70	0.763681	70	0.958853	70	1.17837	70	0.700516	70	0.59591			0.709827	0.235924	0.0541248
	75	0.490805	75	0.804161	75	0.775532	75	0.888707	75	0.612569	75	0.511873	75	0.47047	75	0.491286	75	0.286878	75	1.02617	75	0.373208	75	0.480144	75	0.63104	75	0.874489	75	0.77312	75	0.936426	75	0.964727	75	0.59631	75	0.560453			0.66044	0.209562	0.0480769
	80	0.482852	80	0.775635	80	0.705214	80	0.974306	80	0.589489	80	0.483899	80	0.47466	80	0.459124	80	0.287945	80	0.940633	80	0.311605	80	0.470083	80	0.664062	80	0.947648	80	0.852655	80	0.836916	80	0.989388	80	0.545259	80	0.522774			0.648113	0.220034	0.0504792
	85	0.493813	85	0.744852	85	0.652712	85	0.884139	85	0.533403	85	0.398367	85	0.400583	85	0.392873	85	0.273898	85	0.85002	85	0.289112	85	0.465148	85	0.635718	85	0.998778	85	0.725544	85	0.855191	85	1.04851	85	0.532816	85	0.47582			0.613226	0.227824	0.0522665
	90	0.501717	90	0.750872	90	0.672474	90	0.762187	90	0.554529	90	0.350174	90	0.427871	90	0.397259	90	0.243788	90	0.786308	90	0.262012	90	0.495021	90	0.593394	90	1.01216	90	0.753157	90	0.910665	90	0.932352	90	0.557526	90	0.44638			0.600518	0.219064	0.0502568
	95	0.489466	95	0.815826	95	0.663786	95	0.845567	95	0.532738	95	0.421978	95	0.421198	95	0.465692	95	0.225864	95	0.732841	95	0.241127	95	0.541892	95	0.525089	95	1.06065	95	0.69503	95	0.870715	95	0.917988	95	0.626273	95	0.440026			0.607039	0.220737	0.0506405
	100	0.523042	100	0.754435	100	0.616555	100	0.929699	100	0.456994	100	0.477494	100	0.434819	100	0.47467	100	0.235502	100	0.689916	100	0.227289	100	0.502096	100	0.5194	100	1.14743	100	0.627598	100	0.985701	100	0.977429	100	0.676847	100	0.430611			0.615133	0.244416	0.0560729

## Sheet: Summary
% Chromosome Length		Mean	STDDEV	SEM		Mean	STDDEV	SEM
0-5	IF	1	0	0	FISH	360.961	142.447	32.6796
5-10		0.856394	0.0873294	0.0200347		477.666	279.516	64.1255
10-15		0.75124	0.134012	0.0307445		772.182	699.828	160.552
15-20		0.75998	0.174847	0.0401125		1152.19	944.443	216.67
20-25		0.807198	0.239936	0.0550452		1676.2	1091.51	250.409
25-30		0.816315	0.24107	0.0553054		2058.06	1176.83	269.983
30-35		0.780742	0.215477	0.0494339		2146.56	1176.41	269.886
35-40		0.739358	0.200384	0.0459712		1847.31	1046.35	240.05
40-45		0.680721	0.223586	0.0512941		1344.96	747.708	171.536
45-50		0.648221	0.227799	0.0522607		922.114	534.746	122.679
50-55		0.65909	0.225101	0.0516417		650.776	330.007	75.7087
55-60		0.698788	0.218218	0.0500626		459.919	175.587	40.2824
60-65		0.732328	0.225747	0.0517898		369.718	114.608	26.2929
65-70		0.709827	0.235924	0.0541248		303.941	87.2437	20.0151
70-75		0.66044	0.209562	0.0480769		270.653	76.4019	17.5278
75-80		0.648113	0.220034	0.0504792		258.746	71.0959	16.3105
80-85		0.613226	0.227824	0.0522665		248.915	69.7474	16.0012
85-90		0.600518	0.219064	0.0502568		240.417	72.1788	16.559
90-95		0.607039	0.220737	0.0506405		227.742	57.0818	13.0955
95-100		0.615133	0.244416	0.0560729		218.006	48.5839	11.1459
