# Supplementary material for: Large domains of heterochromatin direct the formation of short mitotic chromosome loops
Source: eLife. 2020 Sep 11;9:e57212. doi: 10.7554/eLife.57212 (PMC7515631; doi:10.7554/eLife.57212)
Supplement: Figure 4—source data 3. [file elife-57212-fig4-data3.xlsx]

## Sheet: H3K9me3
% IP	NPF_C_I1	NPF_C_I3	NPF_C_I2		Mean	STDEV	SEM
	ChIP 51	ChIP 51	ChIP52
Mac1	2.31297	2.41854	0.245248		1.65892	1.00055	0.577666
ChrI_inter	1.18929	1.32203	0.165272		0.892197	0.516862	0.29841
Hut1	1.63347	2.09513	0.194647		1.30775	0.809333	0.467268
Pol5	1.48672	1.54278	0.212112		1.08054	0.614496	0.354779
Pcn1	1.03997	1.4956	0.109947		0.881839	0.576635	0.33292
Ura4	0.628875	0.627511	0.0913699		0.449252	0.253061	0.146105
Mpg1	2.086	3.0375	0.384653		1.83605	1.09735	0.633555
LTR2	1.6234	1.52583	0.211723		1.12032	0.643706	0.371644
LTR3	1.8328	2.08624	0.23423		1.38442	0.819865	0.473349
NeoP	0.266978	0.319958	0.0297672		0.205567	0.126177	0.0728484
mAct	0.506072	0.531229	0.0644491		0.36725	0.214359	0.12376
Hoxc8	0.985104	1.0073	0.117809		0.703402	0.414176	0.239125
mSat	1.70487	2.56756	0.267623		1.51335	0.948661	0.54771
% Sat					Mean	STDEV	SEM
	ChIP 51	ChIP 51	ChIP52
Mac1	1.35668	0.941962	0.916393		1.07168	0.201797	0.116508
ChrI_inter	0.697584	0.514896	0.617554		0.610011	0.0747726	0.04317
Hut1	0.958122	0.815999	0.727316		0.833812	0.095064	0.0548852
Pol5	0.872045	0.600872	0.792578		0.755165	0.113823	0.0657155
Pcn1	0.609999	0.582498	0.410828		0.534442	0.0881263	0.0508798
Ura4	0.368869	0.2444	0.341413		0.318227	0.0533937	0.0308269
Mpg1	1.22355	1.18303	1.4373		1.28129	0.111543	0.0643995
LTR2	0.952212	0.594271	0.791125		0.779203	0.146372	0.0845077
LTR3	1.07503	0.812539	0.875223		0.920932	0.111931	0.0646235
NeoP	0.156597	0.124615	0.111228		0.130813	0.0190332	0.0109888
mAct	0.296839	0.2069	0.24082		0.248186	0.0370848	0.0214109
Hoxc8	0.577817	0.392316	0.440204		0.470112	0.0786279	0.0453958
mSat	1	1	1		1	0	0

## Sheet: No Antibody
% IP	NPF_C_I1	NPF_C_I3	NPF_C_I2		Mean	STDEV	SEM
	ChIP 51	ChIP 51	ChIP52
Mac1	0.0191395	0.0166872	0.00260532		0.0128107	0.00728538	0.00420622
ChrI_inter	0.0196596	0.0229066	0.0172777		0.019948	0.00230703	0.00133196
Hut1	0.0200692	0.0276222	0.00485159		0.0175143	0.00946997	0.00546749
Pol5	0.0288214	0.0436934	0.00271928		0.025078	0.0169358	0.00977787
Pcn1	0.0161003	0.0309372	0.00443138		0.0171563	0.0108467	0.00626235
Ura4	0.00731108	0.0077729	0.000924789		0.00533626	0.00312507	0.00180426
Mpg1	0.0258348	0.0380363	0.00408252		0.0226512	0.0140432	0.00810783
LTR2	0.0136063	0.0208168	0.0106571		0.0150267	0.00426755	0.00246387
LTR3	0.00880908	0.0237535	0.00487869		0.0124804	0.00813116	0.00469453
NeoP	0.000869517	0.00167405	0.00285318		0.00179891	0.000814624	0.000470323
mAct	0.00300851	0.0235673	0.024661		0.0170789	0.00995931	0.00575001
Hoxc8	0.00395283	0.00235377	0.00183165		0.00271275	0.000902406	0.000521005
mSat	0.00140951	0.002055	0.000480892		0.00131513	0.000646081	0.000373015
% Sat					Mean	STDEV	SEM
	ChIP 51	ChIP 51	ChIP52
Mac1	0.0112263	0.00649925	0.00973504		0.00915354	0.00197314	0.00113919
ChrI_inter	0.0115314	0.00892156	0.0645599		0.0283376	0.0256352	0.0148005
Hut1	0.0117717	0.0107581	0.0181285		0.0135528	0.00326186	0.00188323
Pol5	0.0169053	0.0170175	0.0101609		0.0146946	0.00320613	0.00185106
Pcn1	0.00944368	0.0120493	0.0165583		0.0126837	0.00293897	0.00169682
Ura4	0.00428835	0.00302735	0.00345557		0.00359042	0.000523557	0.000302276
Mpg1	0.0151535	0.0148142	0.0152547		0.0150741	0.000188411	0.000108779
LTR2	0.00798085	0.00810762	0.0398214		0.0186366	0.01498	0.0086487
LTR3	0.005167	0.00925139	0.0182297		0.0108827	0.00545616	0.00315011
NeoP	0.000510019	0.000652	0.0106612		0.00394106	0.00475219	0.00274368
mAct	0.00176465	0.00917887	0.0921482		0.0343639	0.0409716	0.023655
Hoxc8	0.00231855	0.000916734	0.00684415		0.00335981	0.00252939	0.00146034
mSat	0.000826752	0.000800369	0.0017969		0.00114134	0.000463675	0.000267703
mSat	1.70487	2.56756	0.267623

## Sheet: All data
		H3K9me3				No Antibody
% Sat		Mean	STDEV	SEM		Mean	STDEV	SEM
Mac1		1.07168	0.201797	0.116508		0.00915354	0.00197314	0.00113919
ChrI_inter		0.610011	0.0747726	0.04317		0.0283376	0.0256352	0.0148005
Hut1		0.833812	0.095064	0.0548852		0.0135528	0.00326186	0.00188323
Pol5		0.755165	0.113823	0.0657155		0.0146946	0.00320613	0.00185106
Pcn1		0.534442	0.0881263	0.0508798		0.0126837	0.00293897	0.00169682
Ura4		0.318227	0.0533937	0.0308269		0.00359042	0.000523557	0.000302276
Mpg1		1.28129	0.111543	0.0643995		0.0150741	0.000188411	0.000108779
LTR2		0.779203	0.146372	0.0845077		0.0186366	0.01498	0.0086487
LTR3		0.920932	0.111931	0.0646235		0.0108827	0.00545616	0.00315011
NeoP		0.130813	0.0190332	0.0109888		0.00394106	0.00475219	0.00274368
mAct		0.248186	0.0370848	0.0214109		0.0343639	0.0409716	0.023655
Hoxc8		0.470112	0.0786279	0.0453958		0.00335981	0.00252939	0.00146034
mSat		1	0	0		0.00114134	0.000463675	0.000267703

## Sheet: All data %
		H3K9me3				No Antibody
% Sat		Mean	STDEV	SEM		Mean	STDEV	SEM
Mac1		107.168	20.1797	11.6508		0.915354	0.197314	0.113919
ChrI_inter		61.0011	7.47726	4.317		2.83376	2.56352	1.48005
Hut1		83.3812	9.5064	5.48852		1.35528	0.326186	0.188323
Pol5		75.5165	11.3823	6.57155		1.46946	0.320613	0.185106
Pcn1		53.4442	8.81263	5.08798		1.26837	0.293897	0.169682
Ura4		31.8227	5.33937	3.08269		0.359042	0.0523557	0.0302276
Mpg1		128.129	11.1543	6.43995		1.50741	0.0188411	0.0108779
LTR2		77.9203	14.6372	8.45077		1.86366	1.498	0.86487
LTR3		92.0932	11.1931	6.46235		1.08827	0.545616	0.315011
NeoP		13.0813	1.90332	1.09888		0.394106	0.475219	0.274368
mAct		24.8186	3.70848	2.14109		3.43639	4.09716	2.3655
Hoxc8		47.0112	7.86279	4.53958		0.335981	0.252939	0.146034
mSat		100	0	0		0.114134	0.0463675	0.0267703
