# Supplementary material for: Large domains of heterochromatin direct the formation of short mitotic chromosome loops
Source: eLife. 2020 Sep 11;9:e57212. doi: 10.7554/eLife.57212 (PMC7515631; doi:10.7554/eLife.57212)
Supplement: Figure 5—figure supplement 1—source data 1. [file elife-57212-fig5-figsupp1-data1.xlsx]

## Sheet: All
1	FISH		IF	3	FISH		IF	4	FISH		IF	5	FISH	X	Y	8	FISH		IF	10	FISH		IF	11	FISH		IF	13	FISH		IF	16	FISH		IF	17	FISH		IF	18	FISH		IF	19	FISH		IF	20	FISH
X	Y	X	Y	X	Y	X	Y	X	Y	X	Y	X	Y	0	38528	X	Y	X	Y	X	Y	X	Y	X	Y	X	Y	X	Y	X	Y	X	Y	X	Y	X	Y	X	Y	X	Y	X	Y	X	Y	X	Y	X	Y
0	127	0	27424	0	137	0	50608	0	123	0	57344	0	147	0.11	45849.3	0	120	0	43392	0	128	0	41584	0	129	0	32480	0	139	0	37408	0	131	0	14528	0	133	0	28224	0	156	0	60544	0	134	0	22304	0	134
0.11	126.775	0.11	26976	0.11	130.881	0.11	49839.5	0.11	117.397	0.11	58493.8	0.11	144.102	0.22	48806.4	0.11	125.105	0.11	45544.3	0.11	120.933	0.11	37364.7	0.11	128.703	0.11	38760.8	0.11	140	0.11	37152	0.11	127.447	0.11	14917.3	0.11	129.022	0.11	34613.4	0.11	143.926	0.11	63935.1	0.11	135.858	0.11	22126.1	0.11	131.433
0.22	130.941	0.22	28576	0.22	132.594	0.22	44631.9	0.22	119.683	0.22	59675	0.22	136.475	0.33	47934.8	0.22	127.881	0.22	46383.4	0.22	127.828	0.22	31801.9	0.22	135.788	0.22	38907.2	0.22	141	0.22	34224	0.22	126.853	0.22	14684.9	0.22	127.15	0.22	38522.6	0.22	136.831	0.22	65247.6	0.22	135.552	0.22	23631.4	0.22	130.89
0.33	124.568	0.33	27344	0.33	125.555	0.33	35854.8	0.33	121.426	0.33	54293.2	0.33	152.074	0.44	42660.5	0.33	121.321	0.33	41893.2	0.33	120.533	0.33	26830.4	0.33	140.13	0.33	38485.8	0.33	148	0.33	32000	0.33	130.327	0.33	14038.1	0.33	130.48	0.33	38507.5	0.33	146.982	0.33	65495.4	0.33	131.118	0.33	24553.2	0.33	135.92
0.44	130.207	0.44	24688	0.44	124.562	0.44	28371.7	0.44	118.779	0.44	48474.5	0.44	139.893	0.55	35916.9	0.44	120.909	0.44	34320.4	0.44	120.369	0.44	23640.8	0.44	137.54	0.44	35258.6	0.44	154	0.44	27088	0.44	132.728	0.44	13775.2	0.44	125.022	0.44	36422.1	0.44	133.89	0.44	65520	0.44	132.99	0.44	24114.3	0.44	136.561
0.55	133	0.55	20656	0.55	127.202	0.55	23355.7	0.55	118.145	0.55	40745.9	0.55	152.133	0.66	29545.5	0.55	123.705	0.55	28516.2	0.55	119.485	0.55	20438.4	0.55	141.425	0.55	27872.6	0.55	181	0.55	26224	0.55	121.206	0.55	13073.1	0.55	128.83	0.55	33032.3	0.55	139.307	0.55	65520	0.55	134.475	0.55	23512.7	0.55	133.129
0.66	134.45	0.66	17520	0.66	128.061	0.66	21005.5	0.66	120.65	0.66	33281.1	0.66	146.219	0.77	25917.8	0.66	122.711	0.66	24604.6	0.66	122.371	0.66	17780.2	0.66	150.287	0.66	21381.4	0.66	204	0.66	23712	0.66	124.909	0.66	12226.5	0.66	136.5	0.66	29435.4	0.66	135.23	0.66	65520	0.66	129.503	0.66	22251.1	0.66	130.835
0.77	130.15	0.77	15728	0.77	132.983	0.77	19735.8	0.77	122.327	0.77	27397.7	0.77	149.92	0.88	25422.5	0.77	119.265	0.77	22048.6	0.77	119.286	0.77	16371.7	0.77	155.464	0.77	20662.5	0.77	204	0.77	22592	0.77	124.565	0.77	11571.6	0.77	139.685	0.77	24851.2	0.77	143.699	0.77	64572.4	0.77	140.703	0.77	21373.2	0.77	130.178
0.88	129.035	0.88	14224	0.88	129.995	0.88	19597.5	0.88	125.419	0.88	23630	0.88	166.857	0.99	24672	0.88	119.745	0.88	21586.2	0.88	121.624	0.88	14051	0.88	144.693	0.88	19421.1	0.88	197	0.88	20224	0.88	126.16	0.88	10699.4	0.88	134.503	0.88	22179	0.88	135.522	0.88	59082.8	0.88	132.358	0.88	19574.5	0.88	137.74
0.99	135.687	0.99	14192	0.99	133.359	0.99	20178.4	0.99	117.581	0.99	20549.4	0.99	156.551	1.1	23081.4	0.99	122.721	0.99	21621.1	0.99	124.719	0.99	12959.3	0.99	148.963	0.99	19530.2	0.99	164	0.99	19376	0.99	127.79	0.99	10432.7	0.99	136.424	0.99	20387.5	0.99	148.543	0.99	52272.2	0.99	131.758	0.99	17795.5	0.99	138.551
1.1	127.527	1.1	12992	1.1	128.568	1.1	20754.4	1.1	116.005	1.1	17972.4	1.1	154.348	1.21	23158.9	1.1	121.811	1.1	19994.7	1.1	126.37	1.1	11742.1	1.1	147.152	1.1	18111.7	1.1	156	1.1	16624	1.1	128.88	1.1	9981.47	1.1	133.694	1.1	18970.1	1.1	157.221	1.1	45926.8	1.1	129.511	1.1	16381.4	1.1	143.74
1.21	139.179	1.21	12128	1.21	137.245	1.21	20036.2	1.21	118.495	1.21	15955.8	1.21	160.855	1.32	22717.4	1.21	120.045	1.21	19239.1	1.21	124.134	1.21	11616.4	1.21	155.856	1.21	16658.8	1.21	164	1.21	16368	1.21	130.315	1.21	10542.4	1.21	132.296	1.21	18101.3	1.21	156.578	1.21	41389.3	1.21	125.697	1.21	15753.6	1.21	144.545
1.32	134.804	1.32	12144	1.32	135.706	1.32	20355.7	1.32	117.93	1.32	13965.4	1.32	156.437	1.43	23046.8	1.32	119.761	1.32	18665.5	1.32	120.629	1.32	10776.4	1.32	154.621	1.32	16198.9	1.32	151	1.32	15776	1.32	134.908	1.32	10679.7	1.32	129.411	1.32	17271	1.32	158.396	1.32	37827.1	1.32	127.726	1.32	15239.2	1.32	143.045
1.43	133.967	1.43	12464	1.43	130.51	1.43	21591.7	1.43	118.705	1.43	12889.1	1.43	175.756	1.54	22529.3	1.43	120.209	1.43	18644.7	1.43	125.556	1.43	10336.6	1.43	158.005	1.43	15766.9	1.43	163	1.43	16224	1.43	129.726	1.43	10450.8	1.43	134.748	1.43	16148.6	1.43	153.836	1.43	34678.8	1.43	129.323	1.43	14202.1	1.43	144.836
1.54	134.376	1.54	11856	1.54	128.176	1.54	22282.8	1.54	120.936	1.54	11927.7	1.54	172.562	1.65	22524.2	1.54	116.921	1.54	18195.5	1.54	120.123	1.54	9987.57	1.54	158.164	1.54	16252.2	1.54	151	1.54	15760	1.54	128.329	1.54	10397.4	1.54	137.917	1.54	15865.2	1.54	151.653	1.54	31571.8	1.54	129.007	1.54	14308.7	1.54	154.88
1.65	137.573	1.65	11504	1.65	135.94	1.65	23396.5	1.65	121.125	1.65	10964.1	1.65	188.358	1.76	20701.5	1.65	122.236	1.65	18881.1	1.65	128.03	1.65	9780.38	1.65	163.8	1.65	15177.2	1.65	161	1.65	15504	1.65	134.537	1.65	10053.1	1.65	140.481	1.65	16235.3	1.65	153.933	1.65	29113.5	1.65	128.39	1.65	13783.1	1.65	166.647
1.76	150.216	1.76	12336	1.76	145.65	1.76	23188.7	1.76	116.32	1.76	11333.9	1.76	193.764	1.87	19539.2	1.76	123.123	1.76	18399.5	1.76	128.518	1.76	9675.06	1.76	172.788	1.76	15328.5	1.76	170	1.76	14624	1.76	134.624	1.76	10239.3	1.76	148.283	1.76	17481.3	1.76	148.374	1.76	25519.8	1.76	129.172	1.76	13646	1.76	169.684
1.87	148.341	1.87	12064	1.87	143.974	1.87	21660.5	1.87	117.798	1.87	11359.6	1.87	200.273	1.98	19238.4	1.87	124.444	1.87	17667.7	1.87	124.6	1.87	9779.45	1.87	196.762	1.87	14389.8	1.87	176	1.87	13408	1.87	130.399	1.87	10783.5	1.87	152.421	1.87	18401.6	1.87	144.006	1.87	22644.7	1.87	133.458	1.87	13722.8	1.87	206.391
1.98	158.007	1.98	12608	1.98	144.838	1.98	21757.2	1.98	119.206	1.98	11647.7	1.98	214.061	2.09	19536.2	1.98	122.176	1.98	17720	1.98	122.21	1.98	9521.41	1.98	237.907	1.98	13664.9	1.98	186	1.98	13461.6	1.98	133.457	1.98	11494.1	1.98	150.342	1.98	20216.2	1.98	156.099	1.98	21650.8	1.98	135.181	1.98	13352.6	1.98	239.772
2.09	163.314	2.09	12816	2.09	146.552	2.09	21915.6	2.09	119.588	2.09	11839.1	2.09	226.573	2.2	19152.2	2.09	121.084	2.09	17189.6	2.09	119.916	2.09	9700.41	2.09	274.197	2.09	13401.1	2.09	182	2.09	13262.3	2.09	138.903	2.09	11729.6	2.09	171.399	2.09	20590.4	2.09	161.677	2.09	20606.8	2.09	132.008	2.09	13058.3	2.09	229.914
2.2	184.09	2.2	12112	2.2	138.276	2.2	21566.4	2.2	118.831	2.2	11625.8	2.2	237.537	2.31	18324.9	2.2	128.698	2.2	17130.2	2.2	122.254	2.2	9543.95	2.2	316.217	2.2	13623.8	2.2	179	2.2	14269.9	2.2	141.52	2.2	11644.1	2.2	222.74	2.2	20430.3	2.2	159.769	2.2	21504.9	2.2	132.382	2.2	13033.1	2.2	224.694
2.31	190.249	2.31	12512	2.31	144.887	2.31	22395.5	2.31	118.45	2.31	10994.6	2.31	290.769	2.42	18087.4	2.31	132.014	2.31	16572.3	2.31	122.025	2.31	9451.75	2.31	382.365	2.31	13926.8	2.31	185	2.31	14365.2	2.31	141.681	2.31	11679.3	2.31	251.876	2.31	20252.7	2.31	161.371	2.31	22466.8	2.31	131.373	2.31	13355.5	2.31	240.347
2.42	220.473	2.42	12480	2.42	144.837	2.42	21971.3	2.42	121.898	2.42	11085.6	2.42	332.951	2.53	17280.9	2.42	128.958	2.42	16003.5	2.42	124.829	2.42	9068.12	2.42	454.03	2.42	12884.3	2.42	221	2.42	13763.3	2.42	145.999	2.42	11795.7	2.42	258.139	2.42	20534.5	2.42	164.806	2.42	22896.7	2.42	128.285	2.42	14443.4	2.42	267.946
2.53	255.906	2.53	13280	2.53	149.089	2.53	22154.2	2.53	121.271	2.53	10670.5	2.53	438.724	2.64	16130.3	2.53	128.304	2.53	15182.5	2.53	118.573	2.53	8653.54	2.53	553.036	2.53	12893.3	2.53	254	2.53	13332.9	2.53	146.616	2.53	11912.8	2.53	262.723	2.53	19603.9	2.53	171.192	2.53	23063.7	2.53	136.225	2.53	16593.7	2.53	284.506
2.64	274.322	2.64	12896	2.64	156.155	2.64	22393.7	2.64	123.639	2.64	11128	2.64	617.756	2.75	15738	2.64	129.776	2.64	15378.5	2.64	122.994	2.64	8262.63	2.64	732.38	2.64	13498.5	2.64	266	2.64	13258.1	2.64	160.927	2.64	11984.3	2.64	260.928	2.64	18955.6	2.64	191.28	2.64	21711	2.64	137.678	2.64	18454.6	2.64	292.123
2.75	276.887	2.75	12080	2.75	172.133	2.75	22554.9	2.75	123.751	2.75	11165.6	2.75	774.487	2.86	15862.4	2.75	127.505	2.75	15387.5	2.75	122.414	2.75	8167.26	2.75	866.514	2.75	14764	2.75	315	2.75	13165.9	2.75	171.317	2.75	11366.9	2.75	255.008	2.75	18323.7	2.75	210.416	2.75	19042	2.75	137.629	2.75	19447.7	2.75	339.164
2.86	285.849	2.86	11728	2.86	195.546	2.86	22865.2	2.86	118.991	2.86	11590.2	2.86	872.651	2.97	16245.3	2.86	124.329	2.86	15172.5	2.86	124.559	2.86	7747.93	2.86	932.072	2.86	15502	2.86	342	2.86	13062.9	2.86	193.284	2.86	11634.8	2.86	269.619	2.86	17370.7	2.86	223.863	2.86	17131.2	2.86	146.972	2.86	18848.8	2.86	402.174
2.97	281.36	2.97	11392	2.97	209.603	2.97	22410.6	2.97	117.73	2.97	11830.4	2.97	886.807	3.08	17158.5	2.97	130.053	2.97	14916.6	2.97	129.033	2.97	7735.92	2.97	981.86	2.97	15506	2.97	432	2.97	13247.5	2.97	215.049	2.97	11933.9	2.97	272.186	2.97	17115.7	2.97	250.239	2.97	15323.4	2.97	149.065	2.97	17832.2	2.97	410.682
3.08	270.87	3.08	11632	3.08	244.197	3.08	22345.4	3.08	119.311	3.08	11773.2	3.08	812.86	3.19	17720.2	3.08	124.093	3.08	14881.3	3.08	128.782	3.08	7433.21	3.08	1056.54	3.08	14447.8	3.08	470	3.08	13613.4	3.08	245.247	3.08	12743	3.08	280.181	3.08	17265.8	3.08	284.083	3.08	14434.4	3.08	147.666	3.08	18242.1	3.08	443.454
3.19	302.2	3.19	11648	3.19	292.905	3.19	22911.8	3.19	121.037	3.19	11567.6	3.19	790.851	3.3	18204.2	3.19	125.813	3.19	14230.7	3.19	122.007	3.19	7549.22	3.19	1076.83	3.19	14045.2	3.19	502	3.19	13157	3.19	287.307	3.19	13329.1	3.19	308.721	3.19	17144.4	3.19	331.362	3.19	15465.2	3.19	148.958	3.19	18163.5	3.19	496.567
3.3	315.64	3.3	10688	3.3	361.141	3.3	21954	3.3	123.457	3.3	11898.8	3.3	767.371	3.41	17547.4	3.3	123.212	3.3	13415.4	3.3	129.581	3.3	7242.3	3.3	977.959	3.3	13132.1	3.3	597.423	3.3	13610.4	3.3	315.461	3.3	13894.6	3.3	316.723	3.3	17868.5	3.3	387.233	3.3	18382	3.3	153.421	3.3	18109.5	3.3	556.724
3.41	337.75	3.41	10336	3.41	437.369	3.41	22215.2	3.41	126.763	3.41	11513.8	3.41	797.472	3.52	16185.3	3.41	121.747	3.41	13182.3	3.41	128.646	3.41	7455.76	3.41	832.369	3.41	12010.7	3.41	686.879	3.41	13391.8	3.41	385.815	3.41	14621.2	3.41	328.977			3.41	461.948	3.41	21761.8	3.41	158.296	3.41	18135.1	3.41	608.43
3.52	392.63	3.52	10256	3.52	478.256	3.52	21703.5	3.52	124.902	3.52	11649.1	3.52	708.469	3.63	14943.4	3.52	124	3.52	12908.6	3.52	127.978	3.52	7676.92	3.52	654.317	3.52	11356.1	3.52	796.672	3.52	14057.4	3.52	463.725	3.52	15128.7	3.52	343.111			3.52	539.954	3.52	23758.9	3.52	170.705	3.52	17172.1	3.52	634.165
3.63	417.11	3.63	10624	3.63	503.805	3.63	21302.3	3.63	120.502	3.63	12256	3.63	658.435	3.74	15161.5	3.63	129.715	3.63	11955.5	3.63	125.117	3.63	7870.6	3.63	485.986	3.63	11441.7	3.63	885.18	3.63	15039	3.63	514.217	3.63	14740.9	3.63	383.978			3.63	646.914	3.63	24524.4	3.63	184.937	3.63	16689.1	3.63	608.333
3.74	451.54	3.74	12160	3.74	522.95	3.74	20717.1	3.74	121.297	3.74	12599.5	3.74	587.526	3.85	15105.1	3.74	127.69	3.74	10855.9	3.74	132.74	3.74	8215.01	3.74	347.447	3.74	12107.2	3.74	968.234	3.74	15303	3.74	567.827	3.74	14337.2					3.74	772.168	3.74	26204.1	3.74	187.734	3.74	17591.5	3.74	540.304
3.85	467.13	3.85	12304	3.85	537.718	3.85	19503.3	3.85	120.57	3.85	11941.2	3.85	475.277	3.96	15196.5	3.85	128.763	3.85	10240.5	3.85	126.25	3.85	8732.91	3.85	270.147	3.85	12215	3.85	959.561	3.85	14731.6	3.85	612.294	3.85	13626.8					3.85	770.615	3.85	26277.7	3.85	190.581	3.85	19792.8	3.85	453.047
3.96	483.11	3.96	13888	3.96	573.318	3.96	18477.9	3.96	126.687	3.96	11986.8	3.96	375.461			3.96	130.521	3.96	10257.3	3.96	121.896	3.96	9123.19	3.96	222.664	3.96	12303.8	3.96	962.25	3.96	13539.2	3.96	611.34	3.96	13547.6					3.96	680.444	3.96	26757.3	3.96	205.04	3.96	19752.5	3.96	352.729
4.07	538.29	4.07	13968	4.07	593.093	4.07	18398	4.07	120.537	4.07	11708.6	4.07	318.318			4.07	130.741	4.07	10484	4.07	122.065	4.07	9542.05	4.07	201.049	4.07	12493.5	4.07	907.485	4.07	12780.6	4.07	641.03	4.07	13317.3					4.07	580.548	4.07	26783.1	4.07	239.557	4.07	20150.7	4.07	319.744
4.18	497.54	4.18	13776	4.18	539.344	4.18	19913	4.18	119.633	4.18	11232.2	4.18	274.901			4.18	130.511	4.18	10605.2	4.18	123.193	4.18	10238.4	4.18	188.632	4.18	12722.3	4.18	819.178	4.18	12173.3	4.18	624.398	4.18	13357.5					4.18	501.696	4.18	26824.8	4.18	272.755	4.18	19150.3	4.18	320.051
4.29	457.12	4.29	14048	4.29	423.299	4.29	24026.3	4.29	119.761	4.29	10781.8	4.29	242.394			4.29	124.994	4.29	10402.7	4.29	123.214	4.29	10977.9	4.29	169.815	4.29	13562	4.29	720.914	4.29	11065.9	4.29	593.856	4.29	13283.2					4.29	413.833	4.29	27449	4.29	310.306	4.29	19411.7	4.29	258.547
4.4	358.87			4.4	341.984	4.4	24456.5	4.4	124.213	4.4	10484.4	4.4	207.064			4.4	126.157	4.4	10310.1	4.4	125.948	4.4	12599.8	4.4	166.406	4.4	15634.6	4.4	639.276	4.4	10632.1	4.4	571.161	4.4	13425.1					4.4	353.542	4.4	27924.5	4.4	374.12	4.4	21235.5	4.4	229.05
4.51	313.44			4.51	282.907	4.51	25113.4	4.51	120.205	4.51	10112	4.51	184.676			4.51	127.938	4.51	10318.3	4.51	126.826	4.51	13901	4.51	156.753	4.51	16061.6	4.51	547.532	4.51	11023.9	4.51	516.617	4.51	14017.5					4.51	296.561	4.51	28812	4.51	434.069	4.51	22455.3	4.51	200.346
4.62	314.64			4.62	264.487	4.62	26383	4.62	117.154	4.62	9425.66	4.62	175.577			4.62	127.914	4.62	10381.4	4.62	127.819	4.62	14154.5	4.62	161.801	4.62	14854.6	4.62	401.58	4.62	11443.4	4.62	468.156	4.62	15354.9					4.62	245.735	4.62	30055.7	4.62	503.64	4.62	21375.9	4.62	170.449
4.73	275.33			4.73	242.261	4.73	27621.3	4.73	123.661	4.73	8830.48	4.73	177.549			4.73	127.223	4.73	10150.5	4.73	126.454	4.73	13705.9	4.73	154.679	4.73	13956.3	4.73	325.423	4.73	11450.1	4.73	433.706	4.73	17328.7					4.73	215.096	4.73	32021.4	4.73	575.457	4.73	20339.7	4.73	163.526
4.84	236.29			4.84	217.266	4.84	28339.4	4.84	123.53	4.84	8659.93	4.84	164.14			4.84	124.77	4.84	10329	4.84	126.624	4.84	12842.7	4.84	160.36	4.84	14940.5	4.84	268.988	4.84	12322.8	4.84	399.162	4.84	18163.7					4.84	200.309	4.84	33818.6	4.84	643.919	4.84	19420.9	4.84	164.867
4.95	194.31			4.95	188.328	4.95	27706.2	4.95	123.234	4.95	8386.44	4.95	155.839			4.95	126.119	4.95	10601.8	4.95	124.963	4.95	11753.9	4.95	143.301	4.95	15544.1	4.95	217.604	4.95	12095.5	4.95	346.096	4.95	18586.6					4.95	197.513	4.95	34884.6	4.95	729.901	4.95	16883.9	4.95	166.398
5.06	202.77			5.06	174.087	5.06	25921.7	5.06	125.445	5.06	8476.79	5.06	149.492			5.06	126.449	5.06	11360.8	5.06	123.499	5.06	10108.2	5.06	135.063	5.06	15579	5.06	192.5	5.06	12669.6	5.06	313.428	5.06	17953.6					5.06	196.918	5.06	34054.5	5.06	776.776	5.06	15990.9	5.06	158.124
5.17	170.31			5.17	164.276	5.17	25217.4	5.17	131.526	5.17	8385.62	5.17	154.182			5.17	138.738	5.17	12031.8	5.17	124.589	5.17	9116.06	5.17	134.021	5.17	16455	5.17	187.891	5.17	13151.5	5.17	270.1	5.17	17080.1					5.17	179.32	5.17	34210.8	5.17	865.012	5.17	15831.8	5.17	150.97
5.28	166.32			5.28	153.701	5.28	24434.7	5.28	129.525	5.28	8367.15	5.28	155.983			5.28	130.43	5.28	12156.1	5.28	126.198	5.28	8176.07	5.28	131.165	5.28	16531.5	5.28	171.687	5.28	13232	5.28	226.257	5.28	16521.5					5.28	169.299	5.28	34710	5.28	882.626	5.28	16172.5	5.28	144.815
5.39	146.25			5.39	152.163	5.39	23898.2	5.39	123.946	5.39	8437.99	5.39	156.926			5.39	135.371	5.39	12375.6	5.39	123.029	5.39	7560.17	5.39	137.005	5.39	15388.8	5.39	178.791	5.39	13886.1	5.39	212.939	5.39	16922.3					5.39	182.357	5.39	35409.9	5.39	889.738	5.39	16821.3	5.39	139.452
5.5	148.64			5.5	149.371	5.5	23159.3	5.5	124.196	5.5	7753.79	5.5	156.384			5.5	130.103	5.5	13427.2	5.5	129.265	5.5	7403.12	5.5	136.916	5.5	14847	5.5	164.506	5.5	14638.4	5.5	190.662	5.5	17248.4					5.5	174.129	5.5	36078.8	5.5	891.892	5.5	18838.7	5.5	140.935
5.61	146.68			5.61	150.229	5.61	22087.7	5.61	129.825	5.61	7558.08					5.61	137.438	5.61	13415.9	5.61	135.63	5.61	7245.74	5.61	133.653	5.61	14913.7	5.61	153.4	5.61	15791.4	5.61	168.382	5.61	16980.2					5.61	159.633	5.61	35341.9	5.61	907.193	5.61	19985.9	5.61	143.478
5.72	141.02			5.72	152.479	5.72	22665.9	5.72	129.067	5.72	7479.61					5.72	137.809	5.72	14552.3	5.72	136.291	5.72	6797.43	5.72	129.947			5.72	146.583	5.72	15659.6	5.72	156.8	5.72	16857.9					5.72	154.653	5.72	31920.2	5.72	853.263	5.72	20474.3	5.72	139.713
5.83	137.51			5.83	156.174	5.83	23142.3	5.83	130.463	5.83	7726.71					5.83	134.639	5.83	14158.9	5.83	135.715	5.83	6612.68	5.83	132.743			5.83	147.468	5.83	16012.9	5.83	144.183	5.83	16963.9					5.83	159.659	5.83	28339.2	5.83	741.186	5.83	19859.5	5.83	135.801
5.94	138.66			5.94	159.204	5.94	23028.7	5.94	129.714	5.94	7851.69					5.94	138.314	5.94	14391.5	5.94	137.079	5.94	6583.21					5.94	142.643	5.94	16044.3	5.94	139.387	5.94	16778.9					5.94	151.487			5.94	591.049	5.94	19326.6	5.94	130.272
6.05	139.83			6.05	148.737	6.05	23534.2	6.05	136.179	6.05	8051.7					6.05	138.672	6.05	15601.5	6.05	139.73	6.05	6593.48					6.05	143.097	6.05	15597.1			6.05	16279.8					6.05	145.813			6.05	520.214	6.05	18994.3	6.05	133.217
6.16	130.87			6.16	141.572	6.16	23519.1	6.16	139.755	6.16	8004.38					6.16	140.585	6.16	15471.3	6.16	140.864	6.16	6090.41					6.16	140.775	6.16	14834.4									6.16	145.644			6.16	452.137	6.16	18632.8	6.16	135.186
6.27	142.28			6.27	136.318	6.27	22510.3	6.27	141.389	6.27	8335.33					6.27	145.972	6.27	14505	6.27	143.622	6.27	6275.49					6.27	133.531											6.27	144.526			6.27	376.876	6.27	17803.7	6.27	146.07
6.38	140.85							6.38	143.743	6.38	8550.77					6.38	142.921	6.38	12940.6	6.38	139.666	6.38	6903.36																	6.38	149.085			6.38	333.329	6.38	16363.6	6.38	140.403
6.49	134.19							6.49	144.51	6.49	8711.96					6.49	143.724	6.49	11578.1	6.49	137.957	6.49	7191.3																	6.49	149.495			6.49	290.429	6.49	16164	6.49	137.556
								6.6	145.004	6.6	8911.14					6.6	154.481	6.6	10946.2	6.6	132.974	6.6	7908.69																	6.6	145.018			6.6	273.488	6.6	15941.6	6.6	137.984
								6.71	143.046	6.71	9023.63					6.71	160.28	6.71	10713.2	6.71	130.567	6.71	8109.94																					6.71	252.244	6.71	15455	6.71	129.571
								6.82	146.184	6.82	9225.17					6.82	154.532	6.82	11053	6.82	130.496	6.82	8529.63																					6.82	226.472	6.82	14917.5	6.82	130.003
								6.93	150.846	6.93	9653.4					6.93	152.97	6.93	10918.3	6.93	133.496	6.93	8805.07																					6.93	214.598	6.93	14503.9	6.93	133.256
								7.04	159.874	7.04	9999.87					7.04	170.206	7.04	10523.7	7.04	135.347	7.04	8945.34																					7.04	191.374	7.04	13953.4	7.04	128.406
								7.15	154.374	7.15	10184.6					7.15	182.706	7.15	10368.6	7.15	145.662	7.15	9242.8																					7.15	177.421	7.15	14043.4	7.15	132.109
								7.26	165.84	7.26	10333.6					7.26	208.04	7.26	9952.04	7.26	155.099	7.26	9519																					7.26	170.057	7.26	14226	7.26	133.028
								7.37	171.124	7.37	10980.8					7.37	221.825	7.37	9404.96	7.37	156.226	7.37	9709.93																					7.37	166.77	7.37	13537	7.37	130.928
								7.48	203.359	7.48	11125.5					7.48	258.78	7.48	9144.08	7.48	159.649	7.48	10295.5																					7.48	150.821	7.48	13609.1	7.48	127.872
								7.59	245.632	7.59	12374.5					7.59	327.501	7.59	9550.25	7.59	177.307	7.59	11034.7																							7.59	12937.4	7.59	130.288
								7.7	282.098	7.7	13112.1					7.7	380.221	7.7	10207	7.7	190.623	7.7	11574.9																							7.7	12963.3	7.7	128.621
								7.81	346.202	7.81	13225					7.81	459.832	7.81	9884.19	7.81	220.994	7.81	12484.3																							7.81	13482.6
								7.92	369.002	7.92	12921.6					7.92	559.336	7.92	8408.19	7.92	231.804	7.92	12780
								8.03	401.829	8.03	12726.5					8.03	621.182	8.03	7545.44	8.03	262.267	8.03	12664.4
								8.14	425.666	8.14	11545.7					8.14	673.828	8.14	7046.7	8.14	294.929	8.14	12210.9
								8.25	366.134	8.25	10565.8					8.25	769.013	8.25	6755.62	8.25	365.156	8.25	11671.5
								8.36	355.575	8.36	9688.84					8.36	871.073	8.36	6800.61	8.36	431.419	8.36	10851.5
								8.47	386.012	8.47	9290.67					8.47	948.512	8.47	7285.17	8.47	517.886	8.47	10560.5
								8.58	400.225	8.58	9577.22					8.58	889.819	8.58	7233.42	8.58	628.2	8.58	10172.2
								8.69	417.651	8.69	9844.38					8.69	810.274	8.69	7238.51	8.69	721.579	8.69	9219.89
								8.8	514.393	8.8	10065.1					8.8	741.801	8.8	6963.23	8.8	764.334	8.8	8758.39
								8.91	583.722	8.91	10687.3					8.91	657.408	8.91	7112.65	8.91	749.392	8.91	8699.62
								9.02	662.636	9.02	11428					9.02	614.877	9.02	7330.76	9.02	698.534	9.02	8738.8
								9.13	772.777	9.13	11937					9.13	573.831	9.13	7095.29	9.13	692.427	9.13	7799.87
								9.24	840.333	9.24	12202.2					9.24	566.592	9.24	6649.2	9.24	661.916	9.24	7729.87
								9.35	883.954	9.35	12252.5					9.35	572.316	9.35	6849.61	9.35	664.072	9.35	7770.85
								9.46	927.711	9.46	11771.4					9.46	612.967	9.46	7268.41	9.46	614.535	9.46	7555.68
								9.57	927.381	9.57	11513.1					9.57	633.331	9.57	6861.25	9.57	544.525	9.57	7355.19
								9.68	849.972	9.68	11239.9					9.68	674.346	9.68	7497.58	9.68	499.887	9.68	7245.86
								9.79	763.233	9.79	10388.4					9.79	648.176	9.79	8321.3	9.79	459.713	9.79	7294.18
								9.9	629.273	9.9	9317.63					9.9	577.474	9.9	8837.25	9.9	410.655	9.9	7337.97
								10.01	529.463	10.01	8553.34					10.01	568.764	10.01	7819.98	10.01	353.083	10.01	7503.97
								10.12	450.214	10.12	8112.13					10.12	573.529	10.12	8102.34	10.12	304.687	10.12	7540.97
								10.23	426.157	10.23	7283.69					10.23	545.271	10.23	8254.83	10.23	245.473	10.23	7727.29
								10.34	380.581	10.34	6843.34					10.34	477.948	10.34	9536.66	10.34	213.532	10.34	7055.34
								10.45	331.485	10.45	6965.97					10.45	438.313	10.45	10842.6	10.45	181.804	10.45	7051.14
								10.56	277.027	10.56	6784.07					10.56	384.444	10.56	11144.2	10.56	168.479	10.56	6741.57
								10.67	249.8	10.67	6799.38					10.67	319.48	10.67	10645	10.67	163.513	10.67	6602
								10.78	231.201	10.78	6779.09					10.78	275.939	10.78	9529.51	10.78	160.238	10.78	7018.33
								10.89	212.8	10.89	6723.42					10.89	258.162	10.89	9532.42	10.89	152.344	10.89	7829.1
								11	200.184	11	6499.56					11	228.149	11	8778.42	11	157.596	11	8356.39
								11.11	178.911	11.11	6109.19					11.11	190.915	11.11	8407.91	11.11	148.78	11.11	8205.22
								11.22	168.108	11.22	6084.18					11.22	178.74	11.22	7575.55	11.22	151.084	11.22	8329.07
								11.33	157.616	11.33	6056.15					11.33	171.651	11.33	7338.35	11.33	138.012	11.33	8624.83
								11.44	151.841	11.44	5998.58					11.44	180.467	11.44	7401.8	11.44	134.424	11.44	9163.61
								11.55	146.901	11.55	6336.43					11.55	187.794	11.55	7930.39	11.55	137.39	11.55	10284
								11.66	146.256	11.66	6330.51					11.66	172.281	11.66	8694.82	11.66	143.789	11.66	11425.7
								11.77	142.161	11.77	6508.43					11.77	151.715	11.77	9213.19	11.77	139.07	11.77	12692
								11.88	136.149	11.88	7046.75					11.88	146.476	11.88	9263.52	11.88	141.74	11.88	13372.4
								11.99	139.437	11.99	6976.76					11.99	142.517	11.99	8787.19	11.99	149.364	11.99	13876.4
								12.1	134.989	12.1	6855.42					12.1	134.543	12.1	8693.47	12.1	147.204	12.1	13391
								12.21	143.587	12.21	6889.69					12.21	136.829	12.21	8183.19	12.21	147.678	12.21	12687.2
								12.32	141.745	12.32	6870.97					12.32	134.998	12.32	7454.99	12.32	144.042	12.32	13099.9
								12.43	134.311	12.43	6274.4					12.43	133.578	12.43	7021.99	12.43	137.062	12.43	13175.9
								12.54	136.865	12.54	5949.88					12.54	134.069	12.54	6905.42	12.54	138.544	12.54	13727
								12.65	129.95	12.65	5973.65					12.65	136.081	12.65	7092.98	12.65	143.122	12.65	15563.5
								12.76	130.118	12.76	5745.37					12.76	137.957	12.76	7101.06	12.76	138.351	12.76	17892.1
								12.87	128.484	12.87	5799.05					12.87	136.184	12.87	7089.49	12.87	135.662	12.87	17084.9
								12.98	127.027	12.98	5976.59					12.98	130.508	12.98	7573.98	12.98	136.253	12.98	15787.6
								13.09	130.701	13.09	6004.06					13.09	126.234	13.09	8679.49	13.09	131.913	13.09	14644.9
								13.2	128.834	13.2	6096.71					13.2	128.946	13.2	10268.8	13.2	128.459
								13.31	123.086	13.31	6013.7					13.31	125.069	13.31	11402.4
								13.42	125.011	13.42	5856.96					13.42	121.051	13.42	11240.2
								13.53	123.688	13.53	5738.35					13.53	123.064	13.53	11054.2
								13.64	122.022	13.64	5935.56					13.64	121.713	13.64	10934.5
								13.75	127.937	13.75	5789.13					13.75	127.014
								13.86	122.522	13.86	6510.43					13.86	124.048
								13.97	124.191	13.97	7491.12					13.97	122.147
								14.08	126.046	14.08	9165.17					14.08	121.497
								14.19	122.876	14.19	9603.71					14.19	124.968
								14.3	123.655	14.3	10592.5					14.3	123.05
								14.41	132.179	14.41	10761.7					14.41	123.778
								14.52	121.477	14.52	10343.3					14.52	123.81
								14.63	119.695	14.63	9633.81					14.63	125.2
								14.74	124.17	14.74	8955.87					14.74	121.98
										14.85	9060.83					14.85	122.413
										14.96	8902.34					14.96	123.895
										15.07	8919.58					15.07	125.552
										15.18	9212.62					15.18	127.9
										15.29	9360.26					15.29	125.661
										15.4	9273.82					15.4	137.562
										15.51	9005.72					15.51	133.338
										15.62	8388.05					15.62	128.587
										15.73	8462.32					15.73	120.166
										15.84	8230.94					15.84	121.596
										15.95	8284.21					15.95	122.51
										16.06	8252.92					16.06	119.141
										16.17	7979.7					16.17	118.539
										16.28	8413.47					16.28	117.597
										16.39	8324.81					16.39	119.236
										16.5	8559.88					16.5	120.96
										16.61	8804.53					16.61	118.868
										16.72	8989.59					16.72	119.586
										16.83	8020.26					16.83	121.333
										16.94	7196.71					16.94	121.045
										17.05	6417.55					17.05	124.075
										17.16	5454.02					17.16	126.584
										17.27	5109.39					17.27	120.025
										17.38	5053.98					17.38	118.444
										17.49	5445.14					17.49	122.355
										17.6	5926.77					17.6	121.204
										17.71	6818.77					17.71	120.776
										17.82	7943.64					17.82	117.056
										17.93	8336.59					17.93	117.215
										18.04	7894.85					18.04	116.008
										18.15	8167.32
										18.26	8476.55
										18.37	8850.28
										18.48	8801.56
										18.59	8288.78
										18.7	8018.31
										18.81	7877.36
										18.92	8066.7
										19.03	7810.29
										19.14	7769.42
										19.25	7875.72
										19.36	8003.28
										19.47	7805.46
										19.58	7538.17
										19.69	6982.46
										19.8	6922.91
										19.91	6376.56
										20.02	6019.97
										20.13	5895.51
										20.24	5689.04
										20.35	4998.59
[truncated: 26 more columns]

## Sheet: Binned
	1	FISH		IF	3	FISH		IF	4	FISH		IF	5	FISH			8	FISH		IF	10	FISH		IF	11	FISH		IF	13	FISH		IF	16	FISH		IF	17	FISH		IF	18	FISH		IF	19	FISH		IF	20
	X	Y	X	Y	X	Y	X	Y	X	Y	X	Y	X	Y	X	Y	X	Y	X	Y	X	Y	X	Y	X	Y	X	Y	X	Y	X	Y	X	Y	X	Y	X	Y	X	Y	X	Y	X	Y	X	Y	X	Y	X
0	0	127	0	27424	0	137	0	50608	0	123	0	57344	0	147	0	38528	0	120	0	43392	0	128	0	41584	0	129	0	32480	0	139	0	37408	0	131	0	14528	0	133	0	28224	0	156	0	60544	0	134	0	22304	0
0.11	1.69492	126.775	2.5641	26976	1.75439	130.881	1.75439	49839.5	0.746269	117.397	0.540541	58493.8	2	144.102	2.77778	45849.3	0.609756	125.105	0.806452	45544.3	0.833333	120.933	0.840336	37364.7	1.88679	128.703	1.96078	38760.8	1.75439	140	1.78571	37152	1.85185	127.447	1.81818	14917.3	3.0303	129.022	3.33333	34613.4	1.66667	143.926	1.88679	63935.1	1.47059	135.858	1.40845	22126.1	1.42857
0.22	3.38983	130.941	5.12821	28576	3.50877	132.594	3.50877	44631.9	1.49254	119.683	1.08108	59675	4	136.475	5.55556	48806.4	1.21951	127.881	1.6129	46383.4	1.66667	127.828	1.68067	31801.9	3.77358	135.788	3.92157	38907.2	3.50877	141	3.57143	34224	3.7037	126.853	3.63636	14684.9	6.06061	127.15	6.66667	38522.6	3.33333	136.831	3.77358	65247.6	2.94118	135.552	2.8169	23631.4	2.85714
0.33	5.08475	124.568	7.69231	27344	5.26316	125.555	5.26316	35854.8	2.23881	121.426	1.62162	54293.2	6	152.074	8.33333	47934.8	1.82927	121.321	2.41935	41893.2	2.5	120.533	2.52101	26830.4	5.66038	140.13	5.88235	38485.8	5.26316	148	5.35714	32000	5.55556	130.327	5.45455	14038.1	9.09091	130.48	10	38507.5	5	146.982	5.66038	65495.4	4.41176	131.118	4.22535	24553.2	4.28571
0.44	6.77966	130.207	10.2564	24688	7.01754	124.562	7.01754	28371.7	2.98507	118.779	2.16216	48474.5	8	139.893	11.1111	42660.5	2.43902	120.909	3.22581	34320.4	3.33333	120.369	3.36134	23640.8	7.54717	137.54	7.84314	35258.6	7.01754	154	7.14286	27088	7.40741	132.728	7.27273	13775.2	12.1212	125.022	13.3333	36422.1	6.66667	133.89	7.54717	65520	5.88235	132.99	5.6338	24114.3	5.71429
0.55	8.47458	133	12.8205	20656	8.77193	127.202	8.77193	23355.7	3.73134	118.145	2.7027	40745.9	10	152.133	13.8889	35916.9	3.04878	123.705	4.03226	28516.2	4.16667	119.485	4.20168	20438.4	9.43396	141.425	9.80392	27872.6	8.77193	181	8.92857	26224	9.25926	121.206	9.09091	13073.1	15.1515	128.83	16.6667	33032.3	8.33333	139.307	9.43396	65520	7.35294	134.475	7.04225	23512.7	7.14286
0.66	10.1695	134.45	15.3846	17520	10.5263	128.061	10.5263	21005.5	4.47761	120.65	3.24324	33281.1	12	146.219	16.6667	29545.5	3.65854	122.711	4.83871	24604.6	5	122.371	5.04202	17780.2	11.3208	150.287	11.7647	21381.4	10.5263	204	10.7143	23712	11.1111	124.909	10.9091	12226.5	18.1818	136.5	20	29435.4	10	135.23	11.3208	65520	8.82353	129.503	8.4507	22251.1	8.57143
0.77	11.8644	130.15	17.9487	15728	12.2807	132.983	12.2807	19735.8	5.22388	122.327	3.78378	27397.7	14	149.92	19.4444	25917.8	4.26829	119.265	5.64516	22048.6	5.83333	119.286	5.88235	16371.7	13.2075	155.464	13.7255	20662.5	12.2807	204	12.5	22592	12.963	124.565	12.7273	11571.6	21.2121	139.685	23.3333	24851.2	11.6667	143.699	13.2075	64572.4	10.2941	140.703	9.85915	21373.2	10
0.88	13.5593	129.035	20.5128	14224	14.0351	129.995	14.0351	19597.5	5.97015	125.419	4.32432	23630	16	166.857	22.2222	25422.5	4.87805	119.745	6.45161	21586.2	6.66667	121.624	6.72269	14051	15.0943	144.693	15.6863	19421.1	14.0351	197	14.2857	20224	14.8148	126.16	14.5455	10699.4	24.2424	134.503	26.6667	22179	13.3333	135.522	15.0943	59082.8	11.7647	132.358	11.2676	19574.5	11.4286
0.99	15.2542	135.687	23.0769	14192	15.7895	133.359	15.7895	20178.4	6.71642	117.581	4.86486	20549.4	18	156.551	25	24672	5.4878	122.721	7.25806	21621.1	7.5	124.719	7.56303	12959.3	16.9811	148.963	17.6471	19530.2	15.7895	164	16.0714	19376	16.6667	127.79	16.3636	10432.7	27.2727	136.424	30	20387.5	15	148.543	16.9811	52272.2	13.2353	131.758	12.6761	17795.5	12.8571
1.1	16.9492	127.527	25.641	12992	17.5439	128.568	17.5439	20754.4	7.46269	116.005	5.40541	17972.4	20	154.348	27.7778	23081.4	6.09756	121.811	8.06452	19994.7	8.33333	126.37	8.40336	11742.1	18.8679	147.152	19.6078	18111.7	17.5439	156	17.8571	16624	18.5185	128.88	18.1818	9981.47	30.303	133.694	33.3333	18970.1	16.6667	157.221	18.8679	45926.8	14.7059	129.511	14.0845	16381.4	14.2857
1.21	18.6441	139.179	28.2051	12128	19.2982	137.245	19.2982	20036.2	8.20896	118.495	5.94595	15955.8	22	160.855	30.5556	23158.9	6.70732	120.045	8.87097	19239.1	9.16667	124.134	9.2437	11616.4	20.7547	155.856	21.5686	16658.8	19.2982	164	19.6429	16368	20.3704	130.315	20	10542.4	33.3333	132.296	36.6667	18101.3	18.3333	156.578	20.7547	41389.3	16.1765	125.697	15.493	15753.6	15.7143
1.32	20.339	134.804	30.7692	12144	21.0526	135.706	21.0526	20355.7	8.95522	117.93	6.48649	13965.4	24	156.437	33.3333	22717.4	7.31707	119.761	9.67742	18665.5	10	120.629	10.084	10776.4	22.6415	154.621	23.5294	16198.9	21.0526	151	21.4286	15776	22.2222	134.908	21.8182	10679.7	36.3636	129.411	40	17271	20	158.396	22.6415	37827.1	17.6471	127.726	16.9014	15239.2	17.1429
1.43	22.0339	133.967	33.3333	12464	22.807	130.51	22.807	21591.7	9.70149	118.705	7.02703	12889.1	26	175.756	36.1111	23046.8	7.92683	120.209	10.4839	18644.7	10.8333	125.556	10.9244	10336.6	24.5283	158.005	25.4902	15766.9	22.807	163	23.2143	16224	24.0741	129.726	23.6364	10450.8	39.3939	134.748	43.3333	16148.6	21.6667	153.836	24.5283	34678.8	19.1176	129.323	18.3099	14202.1	18.5714
1.54	23.7288	134.376	35.8974	11856	24.5614	128.176	24.5614	22282.8	10.4478	120.936	7.56757	11927.7	28	172.562	38.8889	22529.3	8.53659	116.921	11.2903	18195.5	11.6667	120.123	11.7647	9987.57	26.4151	158.164	27.451	16252.2	24.5614	151	25	15760	25.9259	128.329	25.4545	10397.4	42.4242	137.917	46.6667	15865.2	23.3333	151.653	26.4151	31571.8	20.5882	129.007	19.7183	14308.7	20
1.65	25.4237	137.573	38.4615	11504	26.3158	135.94	26.3158	23396.5	11.194	121.125	8.10811	10964.1	30	188.358	41.6667	22524.2	9.14634	122.236	12.0968	18881.1	12.5	128.03	12.605	9780.38	28.3019	163.8	29.4118	15177.2	26.3158	161	26.7857	15504	27.7778	134.537	27.2727	10053.1	45.4545	140.481	50	16235.3	25	153.933	28.3019	29113.5	22.0588	128.39	21.1268	13783.1	21.4286
1.76	27.1186	150.216	41.0256	12336	28.0702	145.65	28.0702	23188.7	11.9403	116.32	8.64865	11333.9	32	193.764	44.4444	20701.5	9.7561	123.123	12.9032	18399.5	13.3333	128.518	13.4454	9675.06	30.1887	172.788	31.3725	15328.5	28.0702	170	28.5714	14624	29.6296	134.624	29.0909	10239.3	48.4848	148.283	53.3333	17481.3	26.6667	148.374	30.1887	25519.8	23.5294	129.172	22.5352	13646	22.8571
1.87	28.8136	148.341	43.5897	12064	29.8246	143.974	29.8246	21660.5	12.6866	117.798	9.18919	11359.6	34	200.273	47.2222	19539.2	10.3659	124.444	13.7097	17667.7	14.1667	124.6	14.2857	9779.45	32.0755	196.762	33.3333	14389.8	29.8246	176	30.3571	13408	31.4815	130.399	30.9091	10783.5	51.5152	152.421	56.6667	18401.6	28.3333	144.006	32.0755	22644.7	25	133.458	23.9437	13722.8	24.2857
1.98	30.5085	158.007	46.1538	12608	31.5789	144.838	31.5789	21757.2	13.4328	119.206	9.72973	11647.7	36	214.061	50	19238.4	10.9756	122.176	14.5161	17720	15	122.21	15.1261	9521.41	33.9623	237.907	35.2941	13664.9	31.5789	186	32.1429	13461.6	33.3333	133.457	32.7273	11494.1	54.5455	150.342	60	20216.2	30	156.099	33.9623	21650.8	26.4706	135.181	25.3521	13352.6	25.7143
2.09	32.2034	163.314	48.7179	12816	33.3333	146.552	33.3333	21915.6	14.1791	119.588	10.2703	11839.1	38	226.573	52.7778	19536.2	11.5854	121.084	15.3226	17189.6	15.8333	119.916	15.9664	9700.41	35.8491	274.197	37.2549	13401.1	33.3333	182	33.9286	13262.3	35.1852	138.903	34.5455	11729.6	57.5758	171.399	63.3333	20590.4	31.6667	161.677	35.8491	20606.8	27.9412	132.008	26.7606	13058.3	27.1429
2.2	33.8983	184.09	51.2821	12112	35.0877	138.276	35.0877	21566.4	14.9254	118.831	10.8108	11625.8	40	237.537	55.5556	19152.2	12.1951	128.698	16.129	17130.2	16.6667	122.254	16.8067	9543.95	37.7358	316.217	39.2157	13623.8	35.0877	179	35.7143	14269.9	37.037	141.52	36.3636	11644.1	60.6061	222.74	66.6667	20430.3	33.3333	159.769	37.7358	21504.9	29.4118	132.382	28.169	13033.1	28.5714
2.31	35.5932	190.249	53.8462	12512	36.8421	144.887	36.8421	22395.5	15.6716	118.45	11.3514	10994.6	42	290.769	58.3333	18324.9	12.8049	132.014	16.9355	16572.3	17.5	122.025	17.6471	9451.75	39.6226	382.365	41.1765	13926.8	36.8421	185	37.5	14365.2	38.8889	141.681	38.1818	11679.3	63.6364	251.876	70	20252.7	35	161.371	39.6226	22466.8	30.8824	131.373	29.5775	13355.5	30
2.42	37.2881	220.473	56.4103	12480	38.5965	144.837	38.5965	21971.3	16.4179	121.898	11.8919	11085.6	44	332.951	61.1111	18087.4	13.4146	128.958	17.7419	16003.5	18.3333	124.829	18.4874	9068.12	41.5094	454.03	43.1373	12884.3	38.5965	221	39.2857	13763.3	40.7407	145.999	40	11795.7	66.6667	258.139	73.3333	20534.5	36.6667	164.806	41.5094	22896.7	32.3529	128.285	30.9859	14443.4	31.4286
2.53	38.9831	255.906	58.9744	13280	40.3509	149.089	40.3509	22154.2	17.1642	121.271	12.4324	10670.5	46	438.724	63.8889	17280.9	14.0244	128.304	18.5484	15182.5	19.1667	118.573	19.3277	8653.54	43.3962	553.036	45.098	12893.3	40.3509	254	41.0714	13332.9	42.5926	146.616	41.8182	11912.8	69.697	262.723	76.6667	19603.9	38.3333	171.192	43.3962	23063.7	33.8235	136.225	32.3944	16593.7	32.8571
2.64	40.678	274.322	61.5385	12896	42.1053	156.155	42.1053	22393.7	17.9104	123.639	12.973	11128	48	617.756	66.6667	16130.3	14.6341	129.776	19.3548	15378.5	20	122.994	20.1681	8262.63	45.283	732.38	47.0588	13498.5	42.1053	266	42.8571	13258.1	44.4444	160.927	43.6364	11984.3	72.7273	260.928	80	18955.6	40	191.28	45.283	21711	35.2941	137.678	33.8028	18454.6	34.2857
2.75	42.3729	276.887	64.1026	12080	43.8596	172.133	43.8596	22554.9	18.6567	123.751	13.5135	11165.6	50	774.487	69.4444	15738	15.2439	127.505	20.1613	15387.5	20.8333	122.414	21.0084	8167.26	47.1698	866.514	49.0196	14764	43.8596	315	44.6429	13165.9	46.2963	171.317	45.4545	11366.9	75.7576	255.008	83.3333	18323.7	41.6667	210.416	47.1698	19042	36.7647	137.629	35.2113	19447.7	35.7143
2.86	44.0678	285.849	66.6667	11728	45.614	195.546	45.614	22865.2	19.403	118.991	14.0541	11590.2	52	872.651	72.2222	15862.4	15.8537	124.329	20.9677	15172.5	21.6667	124.559	21.8487	7747.93	49.0566	932.072	50.9804	15502	45.614	342	46.4286	13062.9	48.1481	193.284	47.2727	11634.8	78.7879	269.619	86.6667	17370.7	43.3333	223.863	49.0566	17131.2	38.2353	146.972	36.6197	18848.8	37.1429
2.97	45.7627	281.36	69.2308	11392	47.3684	209.603	47.3684	22410.6	20.1493	117.73	14.5946	11830.4	54	886.807	75	16245.3	16.4634	130.053	21.7742	14916.6	22.5	129.033	22.6891	7735.92	50.9434	981.86	52.9412	15506	47.3684	432	48.2143	13247.5	50	215.049	49.0909	11933.9	81.8182	272.186	90	17115.7	45	250.239	50.9434	15323.4	39.7059	149.065	38.0282	17832.2	38.5714
3.08	47.4576	270.87	71.7949	11632	49.1228	244.197	49.1228	22345.4	20.8955	119.311	15.1351	11773.2	56	812.86	77.7778	17158.5	17.0732	124.093	22.5806	14881.3	23.3333	128.782	23.5294	7433.21	52.8302	1056.54	54.902	14447.8	49.1228	470	50	13613.4	51.8519	245.247	50.9091	12743	84.8485	280.181	93.3333	17265.8	46.6667	284.083	52.8302	14434.4	41.1765	147.666	39.4366	18242.1	40
3.19	49.1525	302.2	74.359	11648	50.8772	292.905	50.8772	22911.8	21.6418	121.037	15.6757	11567.6	58	790.851	80.5556	17720.2	17.6829	125.813	23.3871	14230.7	24.1667	122.007	24.3697	7549.22	54.717	1076.83	56.8627	14045.2	50.8772	502	51.7857	13157	53.7037	287.307	52.7273	13329.1	87.8788	308.721	96.6667	17144.4	48.3333	331.362	54.717	15465.2	42.6471	148.958	40.8451	18163.5	41.4286
3.3	50.8475	315.64	76.9231	10688	52.6316	361.141	52.6316	21954	22.3881	123.457	16.2162	11898.8	60	767.371	83.3333	18204.2	18.2927	123.212	24.1935	13415.4	25	129.581	25.2101	7242.3	56.6038	977.959	58.8235	13132.1	52.6316	597.423	53.5714	13610.4	55.5556	315.461	54.5455	13894.6	90.9091	316.723	100	17868.5	50	387.233	56.6038	18382	44.1176	153.421	42.2535	18109.5	42.8571
3.41	52.5424	337.75	79.4872	10336	54.386	437.369	54.386	22215.2	23.1343	126.763	16.7568	11513.8	62	797.472	86.1111	17547.4	18.9024	121.747	25	13182.3	25.8333	128.646	26.0504	7455.76	58.4906	832.369	60.7843	12010.7	54.386	686.879	55.3571	13391.8	57.4074	385.815	56.3636	14621.2	93.9394	328.977			51.6667	461.948	58.4906	21761.8	45.5882	158.296	43.662	18135.1	44.2857
3.52	54.2373	392.63	82.0513	10256	56.1404	478.256	56.1404	21703.5	23.8806	124.902	17.2973	11649.1	64	708.469	88.8889	16185.3	19.5122	124	25.8065	12908.6	26.6667	127.978	26.8908	7676.92	60.3774	654.317	62.7451	11356.1	56.1404	796.672	57.1429	14057.4	59.2593	463.725	58.1818	15128.7	96.9697	343.111			53.3333	539.954	60.3774	23758.9	47.0588	170.705	45.0704	17172.1	45.7143
3.63	55.9322	417.11	84.6154	10624	57.8947	503.805	57.8947	21302.3	24.6269	120.502	17.8378	12256	66	658.435	91.6667	14943.4	20.122	129.715	26.6129	11955.5	27.5	125.117	27.7311	7870.6	62.2642	485.986	64.7059	11441.7	57.8947	885.18	58.9286	15039	61.1111	514.217	60	14740.9	100	383.978			55	646.914	62.2642	24524.4	48.5294	184.937	46.4789	16689.1	47.1429
3.74	57.6271	451.54	87.1795	12160	59.6491	522.95	59.6491	20717.1	25.3731	121.297	18.3784	12599.5	68	587.526	94.4444	15161.5	20.7317	127.69	27.4194	10855.9	28.3333	132.74	28.5714	8215.01	64.1509	347.447	66.6667	12107.2	59.6491	968.234	60.7143	15303	62.963	567.827	61.8182	14337.2					56.6667	772.168	64.1509	26204.1	50	187.734	47.8873	17591.5	48.5714
3.85	59.322	467.13	89.7436	12304	61.4035	537.718	61.4035	19503.3	26.1194	120.57	18.9189	11941.2	70	475.277	97.2222	15105.1	21.3415	128.763	28.2258	10240.5	29.1667	126.25	29.4118	8732.91	66.0377	270.147	68.6275	12215	61.4035	959.561	62.5	14731.6	64.8148	612.294	63.6364	13626.8					58.3333	770.615	66.0377	26277.7	51.4706	190.581	49.2958	19792.8	50
3.96	61.0169	483.11	92.3077	13888	63.1579	573.318	63.1579	18477.9	26.8657	126.687	19.4595	11986.8	72	375.461	100	15196.5	21.9512	130.521	29.0323	10257.3	30	121.896	30.2521	9123.19	67.9245	222.664	70.5882	12303.8	63.1579	962.25	64.2857	13539.2	66.6667	611.34	65.4545	13547.6					60	680.444	67.9245	26757.3	52.9412	205.04	50.7042	19752.5	51.4286
4.07	62.7119	538.29	94.8718	13968	64.9123	593.093	64.9123	18398	27.6119	120.537	20	11708.6	74	318.318			22.561	130.741	29.8387	10484	30.8333	122.065	31.0924	9542.05	69.8113	201.049	72.549	12493.5	64.9123	907.485	66.0714	12780.6	68.5185	641.03	67.2727	13317.3					61.6667	580.548	69.8113	26783.1	54.4118	239.557	52.1127	20150.7	52.8571
4.18	64.4068	497.54	97.4359	13776	66.6667	539.344	66.6667	19913	28.3582	119.633	20.5405	11232.2	76	274.901			23.1707	130.511	30.6452	10605.2	31.6667	123.193	31.9328	10238.4	71.6981	188.632	74.5098	12722.3	66.6667	819.178	67.8571	12173.3	70.3704	624.398	69.0909	13357.5					63.3333	501.696	71.6981	26824.8	55.8824	272.755	53.5211	19150.3	54.2857
4.29	66.1017	457.12	100	14048	68.4211	423.299	68.4211	24026.3	29.1045	119.761	21.0811	10781.8	78	242.394			23.7805	124.994	31.4516	10402.7	32.5	123.214	32.7731	10977.9	73.5849	169.815	76.4706	13562	68.4211	720.914	69.6429	11065.9	72.2222	593.856	70.9091	13283.2					65	413.833	73.5849	27449	57.3529	310.306	54.9296	19411.7	55.7143
4.4	67.7966	358.87			70.1754	341.984	70.1754	24456.5	29.8507	124.213	21.6216	10484.4	80	207.064			24.3902	126.157	32.2581	10310.1	33.3333	125.948	33.6134	12599.8	75.4717	166.406	78.4314	15634.6	70.1754	639.276	71.4286	10632.1	74.0741	571.161	72.7273	13425.1					66.6667	353.542	75.4717	27924.5	58.8235	374.12	56.338	21235.5	57.1429
4.51	69.4915	313.44			71.9298	282.907	71.9298	25113.4	30.597	120.205	22.1622	10112	82	184.676			25	127.938	33.0645	10318.3	34.1667	126.826	34.4538	13901	77.3585	156.753	80.3922	16061.6	71.9298	547.532	73.2143	11023.9	75.9259	516.617	74.5455	14017.5					68.3333	296.561	77.3585	28812	60.2941	434.069	57.7465	22455.3	58.5714
4.62	71.1864	314.64			73.6842	264.487	73.6842	26383	31.3433	117.154	22.7027	9425.66	84	175.577			25.6098	127.914	33.871	10381.4	35	127.819	35.2941	14154.5	79.2453	161.801	82.3529	14854.6	73.6842	401.58	75	11443.4	77.7778	468.156	76.3636	15354.9					70	245.735	79.2453	30055.7	61.7647	503.64	59.1549	21375.9	60
4.73	72.8814	275.33			75.4386	242.261	75.4386	27621.3	32.0896	123.661	23.2432	8830.48	86	177.549			26.2195	127.223	34.6774	10150.5	35.8333	126.454	36.1345	13705.9	81.1321	154.679	84.3137	13956.3	75.4386	325.423	76.7857	11450.1	79.6296	433.706	78.1818	17328.7					71.6667	215.096	81.1321	32021.4	63.2353	575.457	60.5634	20339.7	61.4286
4.84	74.5763	236.29			77.193	217.266	77.193	28339.4	32.8358	123.53	23.7838	8659.93	88	164.14			26.8293	124.77	35.4839	10329	36.6667	126.624	36.9748	12842.7	83.0189	160.36	86.2745	14940.5	77.193	268.988	78.5714	12322.8	81.4815	399.162	80	18163.7					73.3333	200.309	83.0189	33818.6	64.7059	643.919	61.9718	19420.9	62.8571
4.95	76.2712	194.31			78.9474	188.328	78.9474	27706.2	33.5821	123.234	24.3243	8386.44	90	155.839			27.439	126.119	36.2903	10601.8	37.5	124.963	37.8151	11753.9	84.9057	143.301	88.2353	15544.1	78.9474	217.604	80.3571	12095.5	83.3333	346.096	81.8182	18586.6					75	197.513	84.9057	34884.6	66.1765	729.901	63.3803	16883.9	64.2857
5.06	77.9661	202.77			80.7018	174.087	80.7018	25921.7	34.3284	125.445	24.8649	8476.79	92	149.492			28.0488	126.449	37.0968	11360.8	38.3333	123.499	38.6555	10108.2	86.7925	135.063	90.1961	15579	80.7018	192.5	82.1429	12669.6	85.1852	313.428	83.6364	17953.6					76.6667	196.918	86.7925	34054.5	67.6471	776.776	64.7887	15990.9	65.7143
5.17	79.661	170.31			82.4561	164.276	82.4561	25217.4	35.0746	131.526	25.4054	8385.62	94	154.182			28.6585	138.738	37.9032	12031.8	39.1667	124.589	39.4958	9116.06	88.6792	134.021	92.1569	16455	82.4561	187.891	83.9286	13151.5	87.037	270.1	85.4545	17080.1					78.3333	179.32	88.6792	34210.8	69.1176	865.012	66.1972	15831.8	67.1429
5.28	81.3559	166.32			84.2105	153.701	84.2105	24434.7	35.8209	129.525	25.9459	8367.15	96	155.983			29.2683	130.43	38.7097	12156.1	40	126.198	40.3361	8176.07	90.566	131.165	94.1176	16531.5	84.2105	171.687	85.7143	13232	88.8889	226.257	87.2727	16521.5					80	169.299	90.566	34710	70.5882	882.626	67.6056	16172.5	68.5714
5.39	83.0508	146.25			85.9649	152.163	85.9649	23898.2	36.5672	123.946	26.4865	8437.99	98	156.926			29.878	135.371	39.5161	12375.6	40.8333	123.029	41.1765	7560.17	92.4528	137.005	96.0784	15388.8	85.9649	178.791	87.5	13886.1	90.7407	212.939	89.0909	16922.3					81.6667	182.357	92.4528	35409.9	72.0588	889.738	69.0141	16821.3	70
5.5	84.7458	148.64			87.7193	149.371	87.7193	23159.3	37.3134	124.196	27.027	7753.79	100	156.384			30.4878	130.103	40.3226	13427.2	41.6667	129.265	42.0168	7403.12	94.3396	136.916	98.0392	14847	87.7193	164.506	89.2857	14638.4	92.5926	190.662	90.9091	17248.4					83.3333	174.129	94.3396	36078.8	73.5294	891.892	70.4225	18838.7	71.4286
5.61	86.4407	146.68			89.4737	150.229	89.4737	22087.7	38.0597	129.825	27.5676	7558.08					31.0976	137.438	41.129	13415.9	42.5	135.63	42.8571	7245.74	96.2264	133.653	100	14913.7	89.4737	153.4	91.0714	15791.4	94.4444	168.382	92.7273	16980.2					85	159.633	96.2264	35341.9	75	907.193	71.831	19985.9	72.8571
5.72	88.1356	141.02			91.2281	152.479	91.2281	22665.9	38.806	129.067	28.1081	7479.61					31.7073	137.809	41.9355	14552.3	43.3333	136.291	43.6975	6797.43	98.1132	129.947			91.2281	146.583	92.8571	15659.6	96.2963	156.8	94.5455	16857.9					86.6667	154.653	98.1132	31920.2	76.4706	853.263	73.2394	20474.3	74.2857
5.83	89.8305	137.51			92.9825	156.174	92.9825	23142.3	39.5522	130.463	28.6486	7726.71					32.3171	134.639	42.7419	14158.9	44.1667	135.715	44.5378	6612.68	100	132.743			92.9825	147.468	94.6429	16012.9	98.1481	144.183	96.3636	16963.9					88.3333	159.659	100	28339.2	77.9412	741.186	74.6479	19859.5	75.7143
5.94	91.5254	138.66			94.7368	159.204	94.7368	23028.7	40.2985	129.714	29.1892	7851.69					32.9268	138.314	43.5484	14391.5	45	137.079	45.3782	6583.21					94.7368	142.643	96.4286	16044.3	100	139.387	98.1818	16778.9					90	151.487			79.4118	591.049	76.0563	19326.6	77.1429
6.05	93.2203	139.83			96.4912	148.737	96.4912	23534.2	41.0448	136.179	29.7297	8051.7					33.5366	138.672	44.3548	15601.5	45.8333	139.73	46.2185	6593.48					96.4912	143.097	98.2143	15597.1			100	16279.8					91.6667	145.813			80.8824	520.214	77.4648	18994.3	78.5714
6.16	94.9153	130.87			98.2456	141.572	98.2456	23519.1	41.791	139.755	30.2703	8004.38					34.1463	140.585	45.1613	15471.3	46.6667	140.864	47.0588	6090.41					98.2456	140.775	100	14834.4									93.3333	145.644			82.3529	452.137	78.8732	18632.8	80
6.27	96.6102	142.28			100	136.318	100	22510.3	42.5373	141.389	30.8108	8335.33					34.7561	145.972	45.9677	14505	47.5	143.622	47.8992	6275.49					100	133.531											95	144.526			83.8235	376.876	80.2817	17803.7	81.4286
6.38	98.3051	140.85							43.2836	143.743	31.3514	8550.77					35.3659	142.921	46.7742	12940.6	48.3333	139.666	48.7395	6903.36																	96.6667	149.085			85.2941	333.329	81.6901	16363.6	82.8571
6.49	100	134.19							44.0299	144.51	31.8919	8711.96					35.9756	143.724	47.5806	11578.1	49.1667	137.957	49.5798	7191.3																	98.3333	149.495			86.7647	290.429	83.0986	16164	84.2857
6.6									44.7761	145.004	32.4324	8911.14					36.5854	154.481	48.3871	10946.2	50	132.974	50.4202	7908.69																	100	145.018			88.2353	273.488	84.507	15941.6	85.7143
6.71									45.5224	143.046	32.973	9023.63					37.1951	160.28	49.1935	10713.2	50.8333	130.567	51.2605	8109.94																					89.7059	252.244	85.9155	15455	87.1429
6.82									46.2687	146.184	33.5135	9225.17					37.8049	154.532	50	11053	51.6667	130.496	52.1008	8529.63																					91.1765	226.472	87.3239	14917.5	88.5714
6.93									47.0149	150.846	34.0541	9653.4					38.4146	152.97	50.8065	10918.3	52.5	133.496	52.9412	8805.07																					92.6471	214.598	88.7324	14503.9	90
7.04									47.7612	159.874	34.5946	9999.87					39.0244	170.206	51.6129	10523.7	53.3333	135.347	53.7815	8945.34																					94.1176	191.374	90.1408	13953.4	91.4286
7.15									48.5075	154.374	35.1351	10184.6					39.6341	182.706	52.4194	10368.6	54.1667	145.662	54.6218	9242.8																					95.5882	177.421	91.5493	14043.4	92.8571
7.26									49.2537	165.84	35.6757	10333.6					40.2439	208.04	53.2258	9952.04	55	155.099	55.4622	9519																					97.0588	170.057	92.9577	14226	94.2857
7.37									50	171.124	36.2162	10980.8					40.8537	221.825	54.0323	9404.96	55.8333	156.226	56.3025	9709.93																					98.5294	166.77	94.3662	13537	95.7143
7.48									50.7463	203.359	36.7568	11125.5					41.4634	258.78	54.8387	9144.08	56.6667	159.649	57.1429	10295.5																					100	150.821	95.7746	13609.1	97.1429
7.59									51.4925	245.632	37.2973	12374.5					42.0732	327.501	55.6452	9550.25	57.5	177.307	57.9832	11034.7																							97.1831	12937.4	98.5714
7.7									52.2388	282.098	37.8378	13112.1					42.6829	380.221	56.4516	10207	58.3333	190.623	58.8235	11574.9																							98.5915	12963.3	100
7.81									52.9851	346.202	38.3784	13225					43.2927	459.832	57.2581	9884.19	59.1667	220.994	59.6639	12484.3																							100	13482.6
7.92									53.7313	369.002	38.9189	12921.6					43.9024	559.336	58.0645	8408.19	60	231.804	60.5042	12780
8.03									54.4776	401.829	39.4595	12726.5					44.5122	621.182	58.871	7545.44	60.8333	262.267	61.3445	12664.4
8.14									55.2239	425.666	40	11545.7					45.122	673.828	59.6774	7046.7	61.6667	294.929	62.1849	12210.9
8.25									55.9701	366.134	40.5405	10565.8					45.7317	769.013	60.4839	6755.62	62.5	365.156	63.0252	11671.5
8.36									56.7164	355.575	41.0811	9688.84					46.3415	871.073	61.2903	6800.61	63.3333	431.419	63.8655	10851.5
8.47									57.4627	386.012	41.6216	9290.67					46.9512	948.512	62.0968	7285.17	64.1667	517.886	64.7059	10560.5
8.58									58.209	400.225	42.1622	9577.22					47.561	889.819	62.9032	7233.42	65	628.2	65.5462	10172.2
8.69									58.9552	417.651	42.7027	9844.38					48.1707	810.274	63.7097	7238.51	65.8333	721.579	66.3866	9219.89
8.8									59.7015	514.393	43.2432	10065.1					48.7805	741.801	64.5161	6963.23	66.6667	764.334	67.2269	8758.39
8.91									60.4478	583.722	43.7838	10687.3					49.3902	657.408	65.3226	7112.65	67.5	749.392	68.0672	8699.62
9.02									61.194	662.636	44.3243	11428					50	614.877	66.129	7330.76	68.3333	698.534	68.9076	8738.8
9.13									61.9403	772.777	44.8649	11937					50.6098	573.831	66.9355	7095.29	69.1667	692.427	69.7479	7799.87
9.24									62.6866	840.333	45.4054	12202.2					51.2195	566.592	67.7419	6649.2	70	661.916	70.5882	7729.87
9.35									63.4328	883.954	45.9459	12252.5					51.8293	572.316	68.5484	6849.61	70.8333	664.072	71.4286	7770.85
9.46									64.1791	927.711	46.4865	11771.4					52.439	612.967	69.3548	7268.41	71.6667	614.535	72.2689	7555.68
9.57									64.9254	927.381	47.027	11513.1					53.0488	633.331	70.1613	6861.25	72.5	544.525	73.1092	7355.19
9.68									65.6716	849.972	47.5676	11239.9					53.6585	674.346	70.9677	7497.58	73.3333	499.887	73.9496	7245.86
9.79									66.4179	763.233	48.1081	10388.4					54.2683	648.176	71.7742	8321.3	74.1667	459.713	74.7899	7294.18
9.9									67.1642	629.273	48.6486	9317.63					54.878	577.474	72.5806	8837.25	75	410.655	75.6303	7337.97
10.01									67.9104	529.463	49.1892	8553.34					55.4878	568.764	73.3871	7819.98	75.8333	353.083	76.4706	7503.97
10.12									68.6567	450.214	49.7297	8112.13					56.0976	573.529	74.1935	8102.34	76.6667	304.687	77.3109	7540.97
10.23									69.403	426.157	50.2703	7283.69					56.7073	545.271	75	8254.83	77.5	245.473	78.1513	7727.29
10.34									70.1493	380.581	50.8108	6843.34					57.3171	477.948	75.8065	9536.66	78.3333	213.532	78.9916	7055.34
10.45									70.8955	331.485	51.3514	6965.97					57.9268	438.313	76.6129	10842.6	79.1667	181.804	79.8319	7051.14
10.56									71.6418	277.027	51.8919	6784.07					58.5366	384.444	77.4194	11144.2	80	168.479	80.6723	6741.57
10.67									72.3881	249.8	52.4324	6799.38					59.1463	319.48	78.2258	10645	80.8333	163.513	81.5126	6602
10.78									73.1343	231.201	52.973	6779.09					59.7561	275.939	79.0323	9529.51	81.6667	160.238	82.3529	7018.33
10.89									73.8806	212.8	53.5135	6723.42					60.3659	258.162	79.8387	9532.42	82.5	152.344	83.1933	7829.1
11									74.6269	200.184	54.0541	6499.56					60.9756	228.149	80.6452	8778.42	83.3333	157.596	84.0336	8356.39
11.11									75.3731	178.911	54.5946	6109.19					61.5854	190.915	81.4516	8407.91	84.1667	148.78	84.8739	8205.22
11.22									76.1194	168.108	55.1351	6084.18					62.1951	178.74	82.2581	7575.55	85	151.084	85.7143	8329.07
11.33									76.8657	157.616	55.6757	6056.15					62.8049	171.651	83.0645	7338.35	85.8333	138.012	86.5546	8624.83
11.44									77.6119	151.841	56.2162	5998.58					63.4146	180.467	83.871	7401.8	86.6667	134.424	87.395	9163.61
11.55									78.3582	146.901	56.7568	6336.43					64.0244	187.794	84.6774	7930.39	87.5	137.39	88.2353	10284
11.66									79.1045	146.256	57.2973	6330.51					64.6341	172.281	85.4839	8694.82	88.3333	143.789	89.0756	11425.7
11.77									79.8507	142.161	57.8378	6508.43					65.2439	151.715	86.2903	9213.19	89.1667	139.07	89.916	12692
11.88									80.597	136.149	58.3784	7046.75					65.8537	146.476	87.0968	9263.52	90	141.74	90.7563	13372.4
11.99									81.3433	139.437	58.9189	6976.76					66.4634	142.517	87.9032	8787.19	90.8333	149.364	91.5966	13876.4
12.1									82.0896	134.989	59.4595	6855.42					67.0732	134.543	88.7097	8693.47	91.6667	147.204	92.437	13391
12.21									82.8358	143.587	60	6889.69					67.6829	136.829	89.5161	8183.19	92.5	147.678	93.2773	12687.2
12.32									83.5821	141.745	60.5405	6870.97					68.2927	134.998	90.3226	7454.99	93.3333	144.042	94.1176	13099.9
12.43									84.3284	134.311	61.0811	6274.4					68.9024	133.578	91.129	7021.99	94.1667	137.062	94.958	13175.9
12.54									85.0746	136.865	61.6216	5949.88					69.5122	134.069	91.9355	6905.42	95	138.544	95.7983	13727
12.65									85.8209	129.95	62.1622	5973.65					70.122	136.081	92.7419	7092.98	95.8333	143.122	96.6387	15563.5
12.76									86.5672	130.118	62.7027	5745.37					70.7317	137.957	93.5484	7101.06	96.6667	138.351	97.479	17892.1
12.87									87.3134	128.484	63.2432	5799.05					71.3415	136.184	94.3548	7089.49	97.5	135.662	98.3193	17084.9
12.98									88.0597	127.027	63.7838	5976.59					71.9512	130.508	95.1613	7573.98	98.3333	136.253	99.1597	15787.6
13.09									88.806	130.701	64.3243	6004.06					72.561	126.234	95.9677	8679.49	99.1667	131.913	100	14644.9
13.2									89.5522	128.834	64.8649	6096.71					73.1707	128.946	96.7742	10268.8	100	128.459
13.31									90.2985	123.086	65.4054	6013.7					73.7805	125.069	97.5806	11402.4
13.42									91.0448	125.011	65.9459	5856.96					74.3902	121.051	98.3871	11240.2
13.53									91.791	123.688	66.4865	5738.35					75	123.064	99.1935	11054.2
13.64									92.5373	122.022	67.027	5935.56					75.6098	121.713	100	10934.5
13.75									93.2836	127.937	67.5676	5789.13					76.2195	127.014
13.86									94.0299	122.522	68.1081	6510.43					76.8293	124.048
13.97									94.7761	124.191	68.6486	7491.12					77.439	122.147
14.08									95.5224	126.046	69.1892	9165.17					78.0488	121.497
14.19									96.2687	122.876	69.7297	9603.71					78.6585	124.968
14.3									97.0149	123.655	70.2703	10592.5					79.2683	123.05
14.41									97.7612	132.179	70.8108	10761.7					79.878	123.778
14.52									98.5075	121.477	71.3514	10343.3					80.4878	123.81
14.63									99.2537	119.695	71.8919	9633.81					81.0976	125.2
14.74									100	124.17	72.4324	8955.87					81.7073	121.98
14.85											72.973	9060.83					82.3171	122.413
14.96											73.5135	8902.34					82.9268	123.895
15.07											74.0541	8919.58					83.5366	125.552
15.18											74.5946	9212.62					84.1463	127.9
15.29											75.1351	9360.26					84.7561	125.661
15.4											75.6757	9273.82					85.3659	137.562
15.51											76.2162	9005.72					85.9756	133.338
15.62											76.7568	8388.05					86.5854	128.587
15.73											77.2973	8462.32					87.1951	120.166
15.84											77.8378	8230.94					87.8049	121.596
15.95											78.3784	8284.21					88.4146	122.51
16.06											78.9189	8252.92					89.0244	119.141
16.17											79.4595	7979.7					89.6341	118.539
16.28											80	8413.47					90.2439	117.597
16.39											80.5405	8324.81					90.8537	119.236
16.5											81.0811	8559.88					91.4634	120.96
16.61											81.6216	8804.53					92.0732	118.868
16.72											82.1622	8989.59					92.6829	119.586
16.83											82.7027	8020.26					93.2927	121.333
16.94											83.2432	7196.71					93.9024	121.045
17.05											83.7838	6417.55					94.5122	124.075
17.16											84.3243	5454.02					95.122	126.584
17.27											84.8649	5109.39					95.7317	120.025
17.38											85.4054	5053.98					96.3415	118.444
17.49											85.9459	5445.14					96.9512	122.355
17.6											86.4865	5926.77					97.561	121.204
17.71											87.027	6818.77					98.1707	120.776
17.82											87.5676	7943.64					98.7805	117.056
17.93											88.1081	8336.59					99.3902	117.215
18.04											88.6486	7894.85					100	116.008
18.15											89.1892	8167.32
18.26											89.7297	8476.55
18.37											90.2703	8850.28
18.48											90.8108	8801.56
18.59											91.3514	8288.78
18.7											91.8919	8018.31
18.81											92.4324	7877.36
18.92											92.973	8066.7
19.03											93.5135	7810.29
19.14											94.0541	7769.42
19.25											94.5946	7875.72
19.36											95.1351	8003.28
19.47											95.6757	7805.46
19.58											96.2162	7538.17
19.69											96.7568	6982.46
19.8											97.2973	6922.91
19.91											97.8378	6376.56
20.02											98.3784	6019.97
20.13											98.9189	5895.51
20.24											99.4595	5689.04
20.35											100	4998.59
	0		0		0		0		0		0		0		0		0		0		0		0		0		0		0		0		0		0		0		0		0		0		0		0		0
	5	128.239	5	27200	5	133.492	5	48359.8	5	119.869	5	42388.5	5	142.526	5	42188.6	5	122.294	5	37807.7	5	122.788	5	30276.7	5	131.164	5	36716	5	140	5	36261.3	5	128.433	5	14710.1	5	131.011	5	31418.7	5	145.935	5	63242.2	5	134.132	5	23153.7	5
	10	129.258	10	27960	10	125.773	10	29194.1	10	119.495	10	13112.8	10	148.033	10	48370.6	10	120.853	10	20525.9	10	122.733	10	14086.8	10	139.698	10	33872.3	10	161	10	28437.3	10	128.087	10	13628.8	10	128.815	10	38515	10	138.852	10	65511.8	10	132.323	10	22812.8	10
	15	131.212	15	22672	15	130.346	15	20112.9	15	119.115	15	11325.5	15	149.424	15	39288.7	15	126.932	15	18251.4	15	124.238	15	10055.9	15	152.875	15	21022	15	201.667	15	22176	15	125.211	15	11499.2	15	125.022	15	37464.8	15	140.748	15	65046.2	15	133.583	15	17917.2	15
	20	134.131	20	16624	20	133.057	20	20323	20	121.333	20	11889.5	20	159.252	20	27731.7	20	125.094	20	16242.7	20	121.829	20	9323.2	20	146.936	20	19021	20	161.333	20	17456	20	128.335	20	10318.9	20	132.665	20	31233.8	20	155.184	20	52427.3	20	127.582	20	14875.9	20
	25	134.382	25	14208	25	131.464	25	21410	25	121.957	25	9809.83	25	157.213	25	25047.2	25	128.559	25	14455.2	25	125.624	25	7816.03	25	156.161	25	16428.8	25	155	25	15920	25	131.65	25	10557.6	25	137.094	25	27143.3	25	154.454	25	37965	25	130.007	25	13717.3	25
	30	145.377	30	12560	30	141.855	30	22748.6	30	121.814	30	7956.93	30	178.892	30	23876.7	30	129.439	30	11412	30	127.458	30	7865.58	30	160.982	30	15732.1	30	169	30	15296	30	132.497	30	10229.9	30	136.424	30	21283.3	30	150.603	30	30342.6	30	133.257	30	13199.9	30
	35	168.47	35	12304	35	145.695	35	21836.4	35	122.205	35	8935.07	35	194.132	35	22938.1	35	137.942	35	10361.4	35	124.423	35	11063.7	35	202.486	35	14859.2	35	184	35	13377.3	35	131.928	35	11335.7	35	132.995	35	19678.8	35	159.729	35	23271.8	35	131.961	35	16497.2	35
	40	222.209	40	11680	40	142.667	40	21977.7	40	128.364	40	11853	40	226.057	40	22788	40	157.727	40	11475.9	40	125.735	40	11946.8	40	324.26	40	13563.3	40	195	40	14132.8	40	140.701	40	11706.4	40	132.079	40	17686.2	40	172.162	40	21526.1	40	142.836	40	18592.7	40
	45	279.019	45	12200	45	159.126	45	22367.6	45	140.042	45	10463	45	287.086	45	21612.9	45	379.59	45	14257.9	45	131.887	45	7299.2	45	503.533	45	13405.5	45	278.333	45	13252.3	45	151.181	45	11897.6	45	137.917	45	16709.8	45	218.95	45	22980.2	45	150.015	45	18136	45
	50	284.81	50	12712	50	216.449	50	22540.4	50	155.898	50	10594.5	50	610.322	50	19388.8	50	775.178	50	12458.2	50	138.842	50	6606.21	50	843.655	50	13718.6	50	414.667	50	13307.9	50	193.217	50	11645.2	50	144.382	50	16050.3	50	313.229	50	19294.8	50	175.418	50	17811.4	50
	55	348.673	55	12312	55	363.805	55	22360.3	55	288.464	55	6754.19	55	844.648	55	19387.3	55	608.212	55	10195	55	137.663	55	8590.25	55	1038.41	55	15151.9	55	595.434	55	13460.3	55	249.201	55	13322.2	55	151.382	55	16858.3	55	509.012	55	15074.3	55	205.728	55	19616.3	55
	60	445.26	60	12880	60	501.67	60	21241	60	409.379	60	6508.29	60	790.361	60	18738.5	60	447.961	60	8773.62	60	184.529	60	10769.7	60	905.164	60	13588.7	60	883.362	60	14162.7	60	388.334	60	14830.3	60	171.399	60	19308.9	60	717.535	60	20071.9	60	319.06	60	21688.9	60
	65	506.313	65	12488	65	568.043	65	18793	65	799.788	65	6158.04	65	757.771	65	17684.2	65	196.02	65	7046.09	65	390.237	65	11789.8	65	495.917	65	11602.8	65	943.099	65	14524.6	65	564.779	65	14235	65	237.308	65	20403.3	65	544.13	65	24829.1	65	539.271	65	18158.8	65
	70	376.477	70	11560	70	481.322	70	21969.7	70	608.052	70	6900.46	70	573.746	70	15934.2	70	139.341	70	7050.99	70	702.34	70	8898.13	70	231.287	70	12161.1	70	770.046	70	12006.6	70	626.185	70	13407.5	70	260.431	70	20341.5	70	327.418	70	26606	70	790.563	70	16275.2	70
	75	275.42	75	11640	75	296.459	75	25317.6	75	269.011	75	9598.06	75	389.685	75	16053.9	75	129.455	75	7956.36	75	550.758	75	7491.94	75	179.224	75	12506.5	75	529.463	75	11033.2	75	596.472	75	13575.3	75	260.928	75	20393.6	75	214.663	75	27136.9	75	892.862	75	19789.6	75
	80	189.13	80	10512	80	215.952	80	27888.9	80	155.971	80	8565.14	80	241.453	80	16701.9	80	123.475	80	9926.46	80	268.245	80	7369.45	80	161.653	80	14598.3	80	270.672	80	11738.8	80	472.826	80	16949.1	80	262.314	80	19279.8	80	185.762	80	28930.7	80	773.173	80	18984.6	80
	85	153.737	85	10440	85	164.021	85	25191.3	85	138.37	85	7529.02	85	189.106	85	17962.2	85	124.551	85	7905.4	85	157.433	85	7458.77	85	152.78	85	14957.5	85	184.026	85	12638.8	85	372.629	85	18234.6	85	276.183	85	18639.6	85	171.355	85	33574.9	85	449.742	85	16568.2	85
	90	141.737	90	12232	90	150.588	90	23048.4	90	130.283	90	7118.18	90	165.843	90	16866.3	90	125.18	90	8805.9	90	140.787	90	10086.5	90	134.542	90	15242.3	90	165.566	90	13918.8	90	269.928	90	16841.3	90	308.721	90	17243.2	90	156.358	90	34132.7	90	287.373	90	14958.8	90
	95	136.453	95	13928	95	155.952	95	22945.6	95	124.065	95	8150.94	95	153.171	95	15052.5	95	120.337	95	7110.99	95	143.662	95	13267.1	95	135.029	95	16188.5	95	145.565	95	15821.3	95	190.661	95	17028.8	95	322.85	95	17190.8	95	146.868	95	35399.6	95	210.815	95	13939.9	95
	100	139.107	100	13912	100	142.209	100	23187.9	100	124.3	100	6623.19	100	156.431	100	15150.8	100	119.963	100	10164.8	100	136.043	100	15783.3	100	132.114	100	15049.8	100	139.134	100	15491.9	100	146.79	100	16674.2	100	363.544	100	17506.4	100	147.031	100	31867.1	100	166.267	100	13248.1	100
[truncated: 35 more columns]

## Sheet: Normalised
	0		0		0		0		0		0		0		0		0		0		0		0		0		0		0		0		0		0		0		0		0		0		0		0		0
	5	128.239	5	27200	5	133.492	5	48359.8	5	119.869	5	42388.5	5	142.526	5	42188.6	5	122.294	5	37807.7	5	122.788	5	30276.7	5	131.164	5	36716	5	140	5	36261.3	5	128.433	5	14710.1	5	131.011	5	31418.7	5	145.935	5	63242.2	5	134.132	5	23153.7	5
	10	129.258	10	27960	10	125.773	10	29194.1	10	119.495	10	13112.8	10	148.033	10	48370.6	10	120.853	10	20525.9	10	122.733	10	14086.8	10	139.698	10	33872.3	10	161	10	28437.3	10	128.087	10	13628.8	10	128.815	10	38515	10	138.852	10	65511.8	10	132.323	10	22812.8	10
	15	131.212	15	22672	15	130.346	15	20112.9	15	119.115	15	11325.5	15	149.424	15	39288.7	15	126.932	15	18251.4	15	124.238	15	10055.9	15	152.875	15	21022	15	201.667	15	22176	15	125.211	15	11499.2	15	125.022	15	37464.8	15	140.748	15	65046.2	15	133.583	15	17917.2	15
	20	134.131	20	16624	20	133.057	20	20323	20	121.333	20	11889.5	20	159.252	20	27731.7	20	125.094	20	16242.7	20	121.829	20	9323.2	20	146.936	20	19021	20	161.333	20	17456	20	128.335	20	10318.9	20	132.665	20	31233.8	20	155.184	20	52427.3	20	127.582	20	14875.9	20
	25	134.382	25	14208	25	131.464	25	21410	25	121.957	25	9809.83	25	157.213	25	25047.2	25	128.559	25	14455.2	25	125.624	25	7816.03	25	156.161	25	16428.8	25	155	25	15920	25	131.65	25	10557.6	25	137.094	25	27143.3	25	154.454	25	37965	25	130.007	25	13717.3	25
	30	145.377	30	12560	30	141.855	30	22748.6	30	121.814	30	7956.93	30	178.892	30	23876.7	30	129.439	30	11412	30	127.458	30	7865.58	30	160.982	30	15732.1	30	169	30	15296	30	132.497	30	10229.9	30	136.424	30	21283.3	30	150.603	30	30342.6	30	133.257	30	13199.9	30
	35	168.47	35	12304	35	145.695	35	21836.4	35	122.205	35	8935.07	35	194.132	35	22938.1	35	137.942	35	10361.4	35	124.423	35	11063.7	35	202.486	35	14859.2	35	184	35	13377.3	35	131.928	35	11335.7	35	132.995	35	19678.8	35	159.729	35	23271.8	35	131.961	35	16497.2	35
	40	222.209	40	11680	40	142.667	40	21977.7	40	128.364	40	11853	40	226.057	40	22788	40	157.727	40	11475.9	40	125.735	40	11946.8	40	324.26	40	13563.3	40	195	40	14132.8	40	140.701	40	11706.4	40	132.079	40	17686.2	40	172.162	40	21526.1	40	142.836	40	18592.7	40
	45	279.019	45	12200	45	159.126	45	22367.6	45	140.042	45	10463	45	287.086	45	21612.9	45	379.59	45	14257.9	45	131.887	45	7299.2	45	503.533	45	13405.5	45	278.333	45	13252.3	45	151.181	45	11897.6	45	137.917	45	16709.8	45	218.95	45	22980.2	45	150.015	45	18136	45
	50	284.81	50	12712	50	216.449	50	22540.4	50	155.898	50	10594.5	50	610.322	50	19388.8	50	775.178	50	12458.2	50	138.842	50	6606.21	50	843.655	50	13718.6	50	414.667	50	13307.9	50	193.217	50	11645.2	50	144.382	50	16050.3	50	313.229	50	19294.8	50	175.418	50	17811.4	50
	55	348.673	55	12312	55	363.805	55	22360.3	55	288.464	55	6754.19	55	844.648	55	19387.3	55	608.212	55	10195	55	137.663	55	8590.25	55	1038.41	55	15151.9	55	595.434	55	13460.3	55	249.201	55	13322.2	55	151.382	55	16858.3	55	509.012	55	15074.3	55	205.728	55	19616.3	55
	60	445.26	60	12880	60	501.67	60	21241	60	409.379	60	6508.29	60	790.361	60	18738.5	60	447.961	60	8773.62	60	184.529	60	10769.7	60	905.164	60	13588.7	60	883.362	60	14162.7	60	388.334	60	14830.3	60	171.399	60	19308.9	60	717.535	60	20071.9	60	319.06	60	21688.9	60
	65	506.313	65	12488	65	568.043	65	18793	65	799.788	65	6158.04	65	757.771	65	17684.2	65	196.02	65	7046.09	65	390.237	65	11789.8	65	495.917	65	11602.8	65	943.099	65	14524.6	65	564.779	65	14235	65	237.308	65	20403.3	65	544.13	65	24829.1	65	539.271	65	18158.8	65
	70	376.477	70	11560	70	481.322	70	21969.7	70	608.052	70	6900.46	70	573.746	70	15934.2	70	139.341	70	7050.99	70	702.34	70	8898.13	70	231.287	70	12161.1	70	770.046	70	12006.6	70	626.185	70	13407.5	70	260.431	70	20341.5	70	327.418	70	26606	70	790.563	70	16275.2	70
	75	275.42	75	11640	75	296.459	75	25317.6	75	269.011	75	9598.06	75	389.685	75	16053.9	75	129.455	75	7956.36	75	550.758	75	7491.94	75	179.224	75	12506.5	75	529.463	75	11033.2	75	596.472	75	13575.3	75	260.928	75	20393.6	75	214.663	75	27136.9	75	892.862	75	19789.6	75
	80	189.13	80	10512	80	215.952	80	27888.9	80	155.971	80	8565.14	80	241.453	80	16701.9	80	123.475	80	9926.46	80	268.245	80	7369.45	80	161.653	80	14598.3	80	270.672	80	11738.8	80	472.826	80	16949.1	80	262.314	80	19279.8	80	185.762	80	28930.7	80	773.173	80	18984.6	80
	85	153.737	85	10440	85	164.021	85	25191.3	85	138.37	85	7529.02	85	189.106	85	17962.2	85	124.551	85	7905.4	85	157.433	85	7458.77	85	152.78	85	14957.5	85	184.026	85	12638.8	85	372.629	85	18234.6	85	276.183	85	18639.6	85	171.355	85	33574.9	85	449.742	85	16568.2	85
	90	141.737	90	12232	90	150.588	90	23048.4	90	130.283	90	7118.18	90	165.843	90	16866.3	90	125.18	90	8805.9	90	140.787	90	10086.5	90	134.542	90	15242.3	90	165.566	90	13918.8	90	269.928	90	16841.3	90	308.721	90	17243.2	90	156.358	90	34132.7	90	287.373	90	14958.8	90
	95	136.453	95	13928	95	155.952	95	22945.6	95	124.065	95	8150.94	95	153.171	95	15052.5	95	120.337	95	7110.99	95	143.662	95	13267.1	95	135.029	95	16188.5	95	145.565	95	15821.3	95	190.661	95	17028.8	95	322.85	95	17190.8	95	146.868	95	35399.6	95	210.815	95	13939.9	95
	100	139.107	100	13912	100	142.209	100	23187.9	100	124.3	100	6623.19	100	156.431	100	15150.8	100	119.963	100	10164.8	100	136.043	100	15783.3	100	132.114	100	15049.8	100	139.134	100	15491.9	100	146.79	100	16674.2	100	363.544	100	17506.4	100	147.031	100	31867.1	100	166.267	100	13248.1	100
	0		0		0		0		0		0		0		0		0		0		0		0		0		0		0		0		0		0		0		0		0		0		0		0		0
	5	1	5	1	5	1	5	1	5	1	5	1	5	1	5	1	5	1	5	1	5	1	5	1	5	1	5	1	5	1	5	1	5	1	5	1	5	1	5	1	5	1	5	1	5	1	5	1	5
	10	1.00795	10	1.02794	10	0.942179	10	0.603684	10	0.99688	10	0.309349	10	1.03864	10	1.14653	10	0.988224	10	0.542901	10	0.999551	10	0.465268	10	1.06507	10	0.922549	10	1.15	10	0.784233	10	0.997303	10	0.926498	10	0.983238	10	1.22586	10	0.951468	10	1.03589	10	0.986511	10	0.985279	10
	15	1.02318	15	0.833529	15	0.976438	15	0.415902	15	0.993712	15	0.267185	15	1.0484	15	0.931262	15	1.03793	15	0.482744	15	1.01181	15	0.332134	15	1.16553	15	0.572555	15	1.44048	15	0.611561	15	0.974913	15	0.781722	15	0.954286	15	1.19244	15	0.964462	15	1.02853	15	0.995903	15	0.773836	15
	20	1.04595	20	0.611176	20	0.996746	20	0.420245	20	1.01222	20	0.280489	20	1.11736	20	0.657325	20	1.0229	20	0.429615	20	0.992184	20	0.307933	20	1.12025	20	0.518057	20	1.15238	20	0.481394	20	0.999234	20	0.701484	20	1.01262	20	0.994116	20	1.06338	20	0.828992	20	0.951168	20	0.642486	20
	25	1.04791	25	0.522353	25	0.984811	25	0.442724	25	1.01743	25	0.231427	25	1.10305	25	0.593697	25	1.05123	25	0.382334	25	1.0231	25	0.258153	25	1.19058	25	0.447457	25	1.10714	25	0.439035	25	1.02504	25	0.717715	25	1.04643	25	0.863921	25	1.05838	25	0.600312	25	0.969245	25	0.592447	25
	30	1.13364	30	0.461765	30	1.06265	30	0.470402	30	1.01623	30	0.187714	30	1.25516	30	0.565951	30	1.05843	30	0.301843	30	1.03803	30	0.25979	30	1.22734	30	0.42848	30	1.20714	30	0.421827	30	1.03164	30	0.695438	30	1.04132	30	0.677408	30	1.03199	30	0.479784	30	0.993478	30	0.5701	30
	35	1.31372	35	0.452353	35	1.09142	35	0.45154	35	1.01949	35	0.21079	35	1.36208	35	0.543704	35	1.12795	35	0.274054	35	1.01331	35	0.365421	35	1.54376	35	0.404706	35	1.31429	35	0.368914	35	1.02721	35	0.770611	35	1.01514	35	0.626341	35	1.09452	35	0.367978	35	0.983814	35	0.712511	35
	40	1.73278	40	0.429412	40	1.06873	40	0.454462	40	1.07087	40	0.279628	40	1.58608	40	0.540147	40	1.28974	40	0.303532	40	1.024	40	0.394589	40	2.47218	40	0.36941	40	1.39286	40	0.389749	40	1.09552	40	0.795805	40	1.00816	40	0.562919	40	1.17972	40	0.340376	40	1.06489	40	0.803013	40
	45	2.17578	45	0.448529	45	1.19203	45	0.462524	45	1.1683	45	0.246836	45	2.01427	45	0.512291	45	3.10392	45	0.377116	45	1.0741	45	0.241083	45	3.83897	45	0.365114	45	1.9881	45	0.365465	45	1.17711	45	0.808806	45	1.05271	45	0.531843	45	1.50032	45	0.363368	45	1.11841	45	0.783289	45
	50	2.22094	50	0.467353	50	1.62144	50	0.466098	50	1.30058	50	0.249939	50	4.28219	50	0.459574	50	6.33867	50	0.329515	50	1.13074	50	0.218194	50	6.43208	50	0.37364	50	2.9619	50	0.367	50	1.50441	50	0.791648	50	1.10206	50	0.510851	50	2.14637	50	0.305093	50	1.3078	50	0.769268	50
	55	2.71894	55	0.452647	55	2.7253	55	0.462374	55	2.4065	55	0.15934	55	5.92629	55	0.459538	55	4.97338	55	0.269653	55	1.12114	55	0.283725	55	7.9169	55	0.412679	55	4.2531	55	0.371202	55	1.94031	55	0.905654	55	1.15549	55	0.53657	55	3.48794	55	0.238358	55	1.53377	55	0.847221	55
	60	3.47212	60	0.473529	60	3.75806	60	0.439228	60	3.41524	60	0.153539	60	5.54539	60	0.44416	60	3.663	60	0.232059	60	1.50282	60	0.355709	60	6.90103	60	0.370101	60	6.30973	60	0.390573	60	3.02362	60	1.00817	60	1.30828	60	0.614569	60	4.91682	60	0.317381	60	2.3787	60	0.936736	60
	65	3.94821	65	0.459118	65	4.25527	65	0.388609	65	6.67221	65	0.145276	65	5.31673	65	0.419169	65	1.60286	65	0.186367	65	3.17813	65	0.389402	65	3.7809	65	0.316016	65	6.73642	65	0.400554	65	4.39745	65	0.967703	65	1.81136	65	0.649401	65	3.72859	65	0.392604	65	4.02045	65	0.784274	65
	70	2.93575	70	0.425	70	3.60563	70	0.454296	70	5.07266	70	0.162791	70	4.02556	70	0.377688	70	1.13939	70	0.186496	70	5.71992	70	0.293894	70	1.76334	70	0.331221	70	5.50033	70	0.331114	70	4.87556	70	0.911449	70	1.98786	70	0.647434	70	2.24359	70	0.4207	70	5.89392	70	0.702922	70
	75	2.14771	75	0.427941	75	2.22081	75	0.523527	75	2.24422	75	0.226431	75	2.73414	75	0.380526	75	1.05856	75	0.210443	75	4.48542	75	0.247449	75	1.36641	75	0.340629	75	3.78188	75	0.304268	75	4.64421	75	0.922856	75	1.99165	75	0.649092	75	1.47095	75	0.429094	75	6.65659	75	0.854706	75
	80	1.47483	80	0.386471	80	1.61772	80	0.576697	80	1.30118	80	0.202063	80	1.6941	80	0.395886	80	1.00966	80	0.262551	80	2.18461	80	0.243403	80	1.23246	80	0.397601	80	1.93337	80	0.323727	80	3.68149	80	1.15221	80	2.00223	80	0.61364	80	1.27291	80	0.457459	80	5.76427	80	0.819937	80
	85	1.19883	85	0.383824	85	1.2287	85	0.520914	85	1.15434	85	0.17762	85	1.32682	85	0.425759	85	1.01846	85	0.209095	85	1.28215	85	0.246353	85	1.1648	85	0.407384	85	1.31447	85	0.348549	85	2.90134	85	1.2396	85	2.10809	85	0.593266	85	1.17419	85	0.530893	85	3.35298	85	0.715576	85
	90	1.10526	90	0.449706	90	1.12807	90	0.476602	90	1.08688	90	0.167927	90	1.1636	90	0.399784	90	1.0236	90	0.232913	90	1.14658	90	0.333145	90	1.02576	90	0.41514	90	1.18261	90	0.383848	90	2.1017	90	1.14488	90	2.35645	90	0.548819	90	1.07142	90	0.539713	90	2.14246	90	0.646066	90
	95	1.06406	95	0.512059	95	1.16826	95	0.474477	95	1.03501	95	0.192291	95	1.07469	95	0.356789	95	0.984005	95	0.188083	95	1.17	95	0.438197	95	1.02947	95	0.440911	95	1.03975	95	0.436313	95	1.48451	95	1.15763	95	2.4643	95	0.547151	95	1.00639	95	0.559746	95	1.5717	95	0.602062	95
	100	1.08475	100	0.511471	100	1.0653	100	0.479487	100	1.03697	100	0.15625	100	1.09756	100	0.359121	100	0.980943	100	0.268855	100	1.10795	100	0.521303	100	1.00725	100	0.409898	100	0.993817	100	0.42723	100	1.14293	100	1.13352	100	2.77492	100	0.557198	100	1.00751	100	0.50389	100	1.23958	100	0.572182	100
[truncated: 31 more columns]

## Sheet: Summary
% Chromosome Length		Mean	STDDEV	SEM		Mean	STDDEV	SEM
0-5	FISH	130.435	7.15855	1.64228	IF	1	0	0
5-10		131.269	10.2957	2.36199		0.786721	0.243744	0.0559188
10-15		135.693	18.0877	4.14961		0.62172	0.248696	0.0570547
15-20		136.989	13.4613	3.08822		0.522325	0.195895	0.0449414
20-25		141.139	17.4426	4.00161		0.467156	0.17346	0.0397945
25-30		154.588	44.9571	10.3139		0.436598	0.152269	0.034933
30-35		176.255	95.4611	21.9003		0.435752	0.160644	0.0368544
35-40		211.675	147.377	33.8106		0.438105	0.165461	0.0379593
40-45		266.805	179.533	41.1877		0.417029	0.170082	0.0390195
45-50		354.59	235.704	54.0742		0.40297	0.173122	0.0397169
50-55		426.543	233.383	53.5418		0.410595	0.206823	0.0474484
55-60		492.461	220.038	50.4802		0.430576	0.23285	0.0534195
60-65		487.37	210.189	48.2207		0.416436	0.227835	0.052269
65-70		422.796	242.187	55.5614		0.402306	0.237651	0.0545209
70-75		325.324	211.755	48.5798		0.417229	0.247205	0.0567126
75-80		240.764	156.111	35.8144		0.427426	0.268136	0.0615147
80-85		190.143	87.5919	20.095		0.430377	0.281412	0.0645604
85-90		166.812	56.627	12.9911		0.447458	0.304902	0.0699494
90-95		154.251	45.9856	10.5498		0.46893	0.335376	0.0769405
95-100		149.133	52.0444	11.9398		0.47036	0.317773	0.0729021
