# Supplementary material for: Large domains of heterochromatin direct the formation of short mitotic chromosome loops
Source: eLife. 2020 Sep 11;9:e57212. doi: 10.7554/eLife.57212 (PMC7515631; doi:10.7554/eLife.57212)
Supplement: Figure 5—figure supplement 1—source data 2. [file elife-57212-fig5-figsupp1-data2.xlsx]

## Sheet: FISH
	0		0		0		0		0		0		0		0		0		0		0		0		0		0		0		0		0		0		0		0		0		0		0		0		0
	5	162.8	5	152.284	5	155.42	5	178.144	5	172.246	5	387.85	5	172.073	5	157.374	5	279.361	5	201.863	5	194.74	5	156.498	5	242.27	5	211.123	5	243.577	5	231.367	5	188.584	5	153.142	5	175.233	5	299.672	5	291.993	5	270.707	5	413.373	5	219.734	5
	10	171.8	10	165.369	10	153.665	10	183.286	10	170.338	10	483.633	10	171.689	10	154.451	10	256.77	10	198.542	10	205.89	10	167.677	10	271.04	10	207.82	10	326.937	10	237.167	10	179.4	10	161.932	10	161.057	10	298.684	10	322.197	10	303.863	10	395.22	10	212.778	10
	15	169.8	15	158.452	15	165.7	15	178.368	15	168.583	15	632.46	15	177.739	15	153.277	15	236.505	15	198.035	15	211.933	15	172.571	15	288.237	15	208.887	15	376.353	15	249.95	15	195.21	15	167.248	15	168.553	15	290.91	15	354.487	15	354.893	15	369.47	15	220.518	15
	20	176.263	20	160.291	20	169.124	20	184.706	20	178.256	20	607.133	20	184.799	20	152.952	20	215.084	20	201.063	20	238.333	20	176.252	20	299.56	20	223.537	20	424.483	20	246.495	20	202.1	20	180.8	20	180.768	20	293.22	20	307.327	20	370.733	20	444.78	20	234.014	20
	25	184.563	25	156.793	25	167.182	25	215.967	25	189.011	25	532.31	25	192.149	25	151.704	25	209.883	25	207	25	233.84	25	177.449	25	313.905	25	241.52	25	505.543	25	289.093	25	212.38	25	168.328	25	198.917	25	393.974	25	324.43	25	433.153	25	555.357	25	286.128	25
	30	205.882	30	171.854	30	175.603	30	285.307	30	209.243	30	550.963	30	208.873	30	160.777	30	208.503	30	229.5	30	248.977	30	177.337	30	395.127	30	241.257	30	529.063	30	327.59	30	246.2	30	193.726	30	190.012	30	498.937	30	344.68	30	577.397	30	695.97	30	337.23	30
	35	251.308	35	184.014	35	175.502	35	325.616	35	242.2	35	726.29	35	230.58	35	165.542	35	215.728	35	275.63	35	311.45	35	185.266	35	616.025	35	247.023	35	471.47	35	385.39	35	288.1	35	234.614	35	194.823	35	583.029	35	409.133	35	909.66	35	998.637	35	453.014	35
	40	398.995	40	213.472	40	178.812	40	553.881	40	323.983	40	892.94	40	294.054	40	187.131	40	257.606	40	335.57	40	582.51	40	190.403	40	1047.62	40	287.24	40	410.457	40	456.04	40	441.06	40	425.944	40	212.623	40	462.478	40	639.693	40	1614.06	40	1449.81	40	1093.14	40
	45	681.852	45	223.585	45	208.248	45	830.787	45	437.418	45	1474.37	45	471.135	45	247.845	45	442.44	45	470.77	45	1278.09	45	251.548	45	1070.26	45	346.11	45	484.483	45	736.083	45	817.69	45	1080.86	45	288.76	45	517.367	45	1235.81	45	3040.96	45	1845.06	45	2367.13	45
	50	585.037	50	234.165	50	246.842	50	706.637	50	532.249	50	2321.58	50	773.929	50	376.98	50	672.907	50	821.67	50	1646.6	50	457.338	50	812.447	50	721.043	50	814.097	50	1150.31	50	1217.85	50	970.232	50	456.99	50	696.207	50	1914.21	50	3834.83	50	1722.14	50	2950.97	50
	55	288.25	55	246.561	55	335.885	55	402.625	55	663.485	55	1783.45	55	770.505	55	551.293	55	915.031	55	1174.99	55	786.477	55	562.046	55	630.43	55	1425.93	55	1555.74	55	1275.71	55	1130.79	55	341.882	55	1024.64	55	595.764	55	1796.49	55	3099.83	55	1507.92	55	2254.32	55
	60	199.957	60	226.362	60	548.026	60	238.166	60	638.299	60	844.557	60	510.323	60	327.424	60	1059.5	60	1392.42	60	499.357	60	445.254	60	511.36	60	2184.74	60	1619.37	60	962.163	60	620.793	60	223.614	60	1172.69	60	744.572	60	1517.71	60	1653.24	60	1196.89	60	2031.11	60
	65	178.472	65	235.882	65	526.425	65	184.952	65	448.135	65	615.1	65	408.215	65	218.214	65	708.916	65	1414.44	65	340.24	65	219.941	65	365.13	65	2049.1	65	860.93	65	697.38	65	310.257	65	188.594	65	834.585	65	951.878	65	1095.83	65	860.087	65	675.82	65	1580.29	65
	70	173.335	70	204.697	70	239	70	167.7	70	313.119	70	476.59	70	320.372	70	169.151	70	446.928	70	591.933	70	282.033	70	187.554	70	295.405	70	1052.61	70	489.125	70	512.535	70	238.158	70	176.378	70	515.273	70	833.774	70	593.727	70	557.23	70	502.503	70	1057.24	70
	75	168.618	75	164.787	75	218.339	75	168.466	75	253.673	75	387.7	75	244.607	75	157.47	75	342.778	75	308.13	75	241.437	75	184.557	75	248.7	75	483.977	75	356.523	75	392.22	75	202.51	75	168.956	75	295.837	75	552.515	75	402.253	75	443.213	75	465.263	75	453.052	75
	80	161.583	80	157.797	80	190.114	80	167.553	80	212.617	80	337.89	80	206.199	80	156.838	80	226.934	80	229.1	80	228.903	80	171.194	80	218.99	80	307.313	80	276.383	80	316.267	80	191.015	80	170.022	80	227.78	80	416.671	80	365.81	80	379.867	80	391.883	80	312.768	80
	85	163.695	85	168.802	85	182.045	85	158.187	85	192.578	85	326.1	85	212.002	85	157.407	85	207.907	85	224.08	85	218.403	85	167.755	85	197.205	85	281.65	85	235.94	85	276.935	85	186.738	85	158.682	85	199.735	85	325.798	85	388.097	85	345.167	85	335.207	85	266.102	85
	90	156.337	90	153.504	90	180.832	90	166.618	90	178.514	90	298.595	90	198.562	90	150.814	90	181.541	90	216.28	90	207.007	90	159.503	90	199.02	90	250.253	90	231.163	90	248.18	90	186.227	90	161.132	90	188.183	90	255.182	90	357.693	90	316.7	90	315.453	90	227.63	90
	95	157.343	95	153.752	95	172.947	95	166.656	95	176.091	95	316.803	95	177.144	95	155.919	95	173.943	95	199.01	95	210.857	95	150.448	95	200.42	95	232.233	95	229.713	95	239.82	95	178.145	95	154.522	95	187.273	95	236.877	95	300.03	95	300.713	95	303.837	95	208.93	95
	100	165.92	100	150.253	100	156.81	100	158.687	100	170.611	100	384.143	100	171.343	100	154.289	100	168.403	100	187.79	100	197.345	100	151.31	100	190.3	100	222.952	100	212.517	100	229.903	100	173.118	100	153.727	100	182.015	100	226.464	100	248.73	100	305.773	100	266.62	100	226.148	100
[truncated: 27 more columns]

## Sheet: IF
	0		0		0		0		0		0		0		0		0		0		0		0		0		0		0		0		0		0		0		0		0		0		0		0		0
	5	7199.18	5	40722.9	5	25860.6	5	17104.6	5	12768	5	25049.7	5	14105.5	5	14584.3	5	9358.34	5	20213.3	5	14089.9	5	9143.62	5	22893.1	5	9226.05	5	11048.5	5	5826.71	5	10906.7	5	9063.91	5	9791.04	5	25581.5	5	28241.5	5	20067.5	5	31010.6	5	8981.45	5
	10	6261.7	10	41396.7	10	20416.6	10	13359.7	10	10117.3	10	17205.3	10	10515.1	10	14069.5	10	7263.4	10	18640	10	10727.9	10	7311.38	10	16945.8	10	8060.36	10	9531.74	10	4963.45	10	8439.39	10	5678.11	10	5986.13	10	19594.4	10	25993.9	10	19252.6	10	25115	10	6127.48	10
	15	7962.32	15	33428.8	15	17311.9	15	11652.3	15	8272	15	13343.8	15	8981.4	15	14869.3	15	4300.48	15	16912	15	11234.4	15	6141.01	15	14132.9	15	6175.94	15	6854.05	15	4603.77	15	6961.62	15	4389.12	15	6168.53	15	16745.5	15	20704	15	19938.8	15	20356.6	15	4333.59	15
	20	7667.07	20	23353.4	20	15228.9	20	12547.4	20	10907.5	20	13923.7	20	8367.4	20	12669.6	20	4779.84	20	15016	20	11166.7	20	6944.48	20	14916.7	20	5947.16	20	5705.66	20	4468	20	5388.83	20	6183.62	20	5287.2	20	16588.4	20	15899.7	20	18968.4	20	21677	20	4417.6	20
	25	7168.92	25	22121.8	25	15857.2	25	11169	25	10665.6	25	14969.8	25	8065.99	25	11786.1	25	5759.68	25	14634.7	25	9034.63	25	7021.19	25	16346.3	25	5541.07	25	5652.07	25	4128.3	25	5547.96	25	4939.24	25	5470.54	25	17039	25	14203.1	25	14686.2	25	21821.2	25	4389.47	25
	30	8183.69	30	19588.3	30	15687.2	30	9187.9	30	8470.53	30	12283.9	30	7713.61	30	8989.55	30	5739.2	30	12816	30	8730.69	30	6599.43	30	13830.4	30	5447.2	30	5872.49	30	4198.03	30	5212.88	30	5873.27	30	4441.86	30	15242.6	30	13699.8	30	14584	30	21610.9	30	4463.55	30
	35	7734.31	35	17522.3	35	12624	35	8287.17	35	8235.38	35	10480.3	35	8517.09	35	7844.93	35	5493.81	35	12469.3	35	9182.13	35	6542.09	35	12392.8	35	5813.98	35	5289.89	35	4334.35	35	4960.57	35	6889.74	35	4471.11	35	13605.9	35	12784.1	35	16746.3	35	18356.4	35	5507.42	35
	40	7893.93	40	17290.2	40	10944.7	40	10562.5	40	10735.9	40	11267.3	40	10228.8	40	9650.49	40	5675.52	40	13464	40	11430.9	40	6594.55	40	14055.3	40	6244.26	40	5383.39	40	4288.28	40	4635.23	40	5414.76	40	4289.48	40	15187.9	40	13689.1	40	19568.1	40	19059.6	40	5553.83	40
	45	9049.91	45	19449.8	45	11698.3	45	13627.6	45	10708.2	45	13194.5	45	10125.3	45	12660.2	45	6535.11	45	13802.7	45	10990.2	45	7472.07	45	13724.9	45	5032.36	45	5631.59	45	4578.34	45	5009.68	45	5495.93	45	4948.32	45	17799.2	45	16059.1	45	20336	45	22398.5	45	5678.61	45
	50	7019.13	50	22387.6	50	14077.9	50	9753.7	50	9439.53	50	13675.7	50	12785.6	50	10566.7	50	6368.57	50	15120	50	9421.3	50	8159.36	50	12422.7	50	5489.11	50	6356.51	50	4675.07	50	5407.78	50	5584.95	50	5967.62	50	17825.3	50	16237.3	50	18296	50	21104.5	50	6577.47	50
	55	5935.55	55	24809.9	55	15171.1	55	8689.91	55	9922.73	55	13690.8	55	10675.3	55	7478.48	55	6467.95	55	17464	55	9862	55	9286.41	55	12136.2	55	6430.02	55	6959.45	55	4494.25	55	5587.5	55	5662.71	55	5823.95	55	15122.5	55	15377.2	55	17592	55	18586.1	55	5649.08	55
	60	5659.93	60	22678	60	14003.6	60	7238.8	60	9448.3	60	14091	60	8887.88	60	9380.62	60	6712.84	60	15275.5	60	13811.9	60	9286.24	60	13943.2	60	8222.91	60	8926.92	60	4153.06	60	6378.47	60	3705.94	60	5814.91	60	13671.6	60	14704.8	60	17936	60	21577.8	60	4344.99	60
	65	7167.84	65	18482	65	13223.6	65	8365.49	65	7308.26	65	11086.9	65	8541.29	65	9657.49	65	4915.98	65	13908.2	65	11569.9	65	9720.67	65	13655.4	65	6986.22	65	6660.02	65	4151.92	65	6661.12	65	4835.9	65	4785.46	65	12517.6	65	15601.2	65	17232	65	21700.9	65	4116.93	65
	70	6925.72	70	16477.6	70	15319.8	70	8203.05	70	5742.29	70	9887.82	70	8397.79	70	7823.34	70	4398.88	70	12069.3	70	10693.6	70	8099.99	70	11101.2	70	5603.26	70	5348.58	70	4165.49	70	5046.61	70	5144.61	70	4535.9	70	12232	70	16442.1	70	15817	70	16843.2	70	4554.59	70
	75	6779.55	75	14926.5	75	15000.3	75	6015.06	75	5812.13	75	9692.98	75	9014.2	75	8139.56	75	4397.08	75	11634.2	75	8539.12	75	8515.86	75	13105.8	75	4957.9	75	5841.45	75	4025.5	75	4352.52	75	4298.65	75	4020.77	75	12283.4	75	15678.6	75	16422	75	15307.4	75	4153.56	75
	80	6322.08	80	14778.8	80	15136.8	80	5966.2	80	7622.52	80	9010.33	80	7099.81	80	7632.48	80	4514.54	80	12176.5	80	8171.96	80	8193.67	80	12650.3	80	4330.01	80	6619.12	80	3737.75	80	4412.01	80	4895.25	80	4425.81	80	12312.5	80	13275.2	80	16983.2	80	15816	80	4669.08	80
	85	4812.82	85	14112	85	17681.3	85	6796.05	85	8381.78	85	9177.08	85	6382.4	85	8691.65	85	4958.09	85	10311.1	85	8181.11	85	7248.9	85	11796	85	4184.14	85	6520.59	85	3725.19	85	4402.43	85	4302.15	85	4347.38	85	11441.4	85	11834.5	85	16946.5	85	15791.1	85	3527.23	85
	90	4491.48	90	16381.4	90	17979.1	90	6089.67	90	8620.57	90	8727.14	90	7084.28	90	8542.81	90	5046.93	90	9480.02	90	8253.51	90	7699.1	90	9231.33	90	4147.08	90	7335.74	90	3565.86	90	4333.9	90	3681.59	90	3894.72	90	11269.4	90	10627	90	17783.7	90	15030.7	90	3376.53	90
	95	4272.5	95	16952	95	18114.1	95	6216.17	95	8550.21	95	7544.98	95	6194.38	95	7626.61	95	4480.04	95	9203.88	95	8546.46	95	8471.39	95	8485.41	95	4120.61	95	9407.45	95	3337.25	95	4950.61	95	3605.49	95	3595.66	95	11058.8	95	9481.82	95	17612.8	95	13951.7	95	3725.81	95
	100	4226.46	100	12511.4	100	16893	100	6369.56	100	7890.06	100	7075.04	100	5933.9	100	6920.12	100	4254.05	100	8875.18	100	7713.86	100	7887.08	100	9206.79	100	4322.69	100	7696.64	100	3348.9	100	4546.11	100	3032.34	100	3569.83	100	10730.7	100	9857.81	100	16000.7	100	13200.3	100	3390.08	100
[truncated: 27 more columns]

## Sheet: IF Normalised
	0		0		0		0		0		0		0		0		0		0		0		0		0		0		0		0		0		0		0		0		0		0		0		0		0
	5	7199.18	5	40722.9	5	25860.6	5	17104.6	5	12768	5	25049.7	5	14105.5	5	14584.3	5	9358.34	5	20213.3	5	14089.9	5	9143.62	5	22893.1	5	9226.05	5	11048.5	5	5826.71	5	10906.7	5	9063.91	5	9791.04	5	25581.5	5	28241.5	5	20067.5	5	31010.6	5	8981.45	5
	10	6261.7	10	41396.7	10	20416.6	10	13359.7	10	10117.3	10	17205.3	10	10515.1	10	14069.5	10	7263.4	10	18640	10	10727.9	10	7311.38	10	16945.8	10	8060.36	10	9531.74	10	4963.45	10	8439.39	10	5678.11	10	5986.13	10	19594.4	10	25993.9	10	19252.6	10	25115	10	6127.48	10
	15	7962.32	15	33428.8	15	17311.9	15	11652.3	15	8272	15	13343.8	15	8981.4	15	14869.3	15	4300.48	15	16912	15	11234.4	15	6141.01	15	14132.9	15	6175.94	15	6854.05	15	4603.77	15	6961.62	15	4389.12	15	6168.53	15	16745.5	15	20704	15	19938.8	15	20356.6	15	4333.59	15
	20	7667.07	20	23353.4	20	15228.9	20	12547.4	20	10907.5	20	13923.7	20	8367.4	20	12669.6	20	4779.84	20	15016	20	11166.7	20	6944.48	20	14916.7	20	5947.16	20	5705.66	20	4468	20	5388.83	20	6183.62	20	5287.2	20	16588.4	20	15899.7	20	18968.4	20	21677	20	4417.6	20
	25	7168.92	25	22121.8	25	15857.2	25	11169	25	10665.6	25	14969.8	25	8065.99	25	11786.1	25	5759.68	25	14634.7	25	9034.63	25	7021.19	25	16346.3	25	5541.07	25	5652.07	25	4128.3	25	5547.96	25	4939.24	25	5470.54	25	17039	25	14203.1	25	14686.2	25	21821.2	25	4389.47	25
	30	8183.69	30	19588.3	30	15687.2	30	9187.9	30	8470.53	30	12283.9	30	7713.61	30	8989.55	30	5739.2	30	12816	30	8730.69	30	6599.43	30	13830.4	30	5447.2	30	5872.49	30	4198.03	30	5212.88	30	5873.27	30	4441.86	30	15242.6	30	13699.8	30	14584	30	21610.9	30	4463.55	30
	35	7734.31	35	17522.3	35	12624	35	8287.17	35	8235.38	35	10480.3	35	8517.09	35	7844.93	35	5493.81	35	12469.3	35	9182.13	35	6542.09	35	12392.8	35	5813.98	35	5289.89	35	4334.35	35	4960.57	35	6889.74	35	4471.11	35	13605.9	35	12784.1	35	16746.3	35	18356.4	35	5507.42	35
	40	7893.93	40	17290.2	40	10944.7	40	10562.5	40	10735.9	40	11267.3	40	10228.8	40	9650.49	40	5675.52	40	13464	40	11430.9	40	6594.55	40	14055.3	40	6244.26	40	5383.39	40	4288.28	40	4635.23	40	5414.76	40	4289.48	40	15187.9	40	13689.1	40	19568.1	40	19059.6	40	5553.83	40
	45	9049.91	45	19449.8	45	11698.3	45	13627.6	45	10708.2	45	13194.5	45	10125.3	45	12660.2	45	6535.11	45	13802.7	45	10990.2	45	7472.07	45	13724.9	45	5032.36	45	5631.59	45	4578.34	45	5009.68	45	5495.93	45	4948.32	45	17799.2	45	16059.1	45	20336	45	22398.5	45	5678.61	45
	50	7019.13	50	22387.6	50	14077.9	50	9753.7	50	9439.53	50	13675.7	50	12785.6	50	10566.7	50	6368.57	50	15120	50	9421.3	50	8159.36	50	12422.7	50	5489.11	50	6356.51	50	4675.07	50	5407.78	50	5584.95	50	5967.62	50	17825.3	50	16237.3	50	18296	50	21104.5	50	6577.47	50
	55	5935.55	55	24809.9	55	15171.1	55	8689.91	55	9922.73	55	13690.8	55	10675.3	55	7478.48	55	6467.95	55	17464	55	9862	55	9286.41	55	12136.2	55	6430.02	55	6959.45	55	4494.25	55	5587.5	55	5662.71	55	5823.95	55	15122.5	55	15377.2	55	17592	55	18586.1	55	5649.08	55
	60	5659.93	60	22678	60	14003.6	60	7238.8	60	9448.3	60	14091	60	8887.88	60	9380.62	60	6712.84	60	15275.5	60	13811.9	60	9286.24	60	13943.2	60	8222.91	60	8926.92	60	4153.06	60	6378.47	60	3705.94	60	5814.91	60	13671.6	60	14704.8	60	17936	60	21577.8	60	4344.99	60
	65	7167.84	65	18482	65	13223.6	65	8365.49	65	7308.26	65	11086.9	65	8541.29	65	9657.49	65	4915.98	65	13908.2	65	11569.9	65	9720.67	65	13655.4	65	6986.22	65	6660.02	65	4151.92	65	6661.12	65	4835.9	65	4785.46	65	12517.6	65	15601.2	65	17232	65	21700.9	65	4116.93	65
	70	6925.72	70	16477.6	70	15319.8	70	8203.05	70	5742.29	70	9887.82	70	8397.79	70	7823.34	70	4398.88	70	12069.3	70	10693.6	70	8099.99	70	11101.2	70	5603.26	70	5348.58	70	4165.49	70	5046.61	70	5144.61	70	4535.9	70	12232	70	16442.1	70	15817	70	16843.2	70	4554.59	70
	75	6779.55	75	14926.5	75	15000.3	75	6015.06	75	5812.13	75	9692.98	75	9014.2	75	8139.56	75	4397.08	75	11634.2	75	8539.12	75	8515.86	75	13105.8	75	4957.9	75	5841.45	75	4025.5	75	4352.52	75	4298.65	75	4020.77	75	12283.4	75	15678.6	75	16422	75	15307.4	75	4153.56	75
	80	6322.08	80	14778.8	80	15136.8	80	5966.2	80	7622.52	80	9010.33	80	7099.81	80	7632.48	80	4514.54	80	12176.5	80	8171.96	80	8193.67	80	12650.3	80	4330.01	80	6619.12	80	3737.75	80	4412.01	80	4895.25	80	4425.81	80	12312.5	80	13275.2	80	16983.2	80	15816	80	4669.08	80
	85	4812.82	85	14112	85	17681.3	85	6796.05	85	8381.78	85	9177.08	85	6382.4	85	8691.65	85	4958.09	85	10311.1	85	8181.11	85	7248.9	85	11796	85	4184.14	85	6520.59	85	3725.19	85	4402.43	85	4302.15	85	4347.38	85	11441.4	85	11834.5	85	16946.5	85	15791.1	85	3527.23	85
	90	4491.48	90	16381.4	90	17979.1	90	6089.67	90	8620.57	90	8727.14	90	7084.28	90	8542.81	90	5046.93	90	9480.02	90	8253.51	90	7699.1	90	9231.33	90	4147.08	90	7335.74	90	3565.86	90	4333.9	90	3681.59	90	3894.72	90	11269.4	90	10627	90	17783.7	90	15030.7	90	3376.53	90
	95	4272.5	95	16952	95	18114.1	95	6216.17	95	8550.21	95	7544.98	95	6194.38	95	7626.61	95	4480.04	95	9203.88	95	8546.46	95	8471.39	95	8485.41	95	4120.61	95	9407.45	95	3337.25	95	4950.61	95	3605.49	95	3595.66	95	11058.8	95	9481.82	95	17612.8	95	13951.7	95	3725.81	95
	100	4226.46	100	12511.4	100	16893	100	6369.56	100	7890.06	100	7075.04	100	5933.9	100	6920.12	100	4254.05	100	8875.18	100	7713.86	100	7887.08	100	9206.79	100	4322.69	100	7696.64	100	3348.9	100	4546.11	100	3032.34	100	3569.83	100	10730.7	100	9857.81	100	16000.7	100	13200.3	100	3390.08	100
	0		0		0		0		0		0		0		0		0		0		0		0		0		0		0		0		0		0		0		0		0		0		0		0		0
	5	1	5	1	5	1	5	1	5	1	5	1	5	1	5	1	5	1	5	1	5	1	5	1	5	1	5	1	5	1	5	1	5	1	5	1	5	1	5	1	5	1	5	1	5	1	5	1	5
	10	0.86978	10	1.01655	10	0.78949	10	0.781055	10	0.792398	10	0.686847	10	0.745459	10	0.964705	10	0.776142	10	0.922164	10	0.761391	10	0.799615	10	0.740216	10	0.873653	10	0.862715	10	0.851843	10	0.77378	10	0.626453	10	0.611389	10	0.765962	10	0.920415	10	0.959394	10	0.809885	10	0.682237	10
	15	1.106	15	0.820885	15	0.669431	15	0.681239	15	0.64787	15	0.532693	15	0.636731	15	1.01955	15	0.459534	15	0.836675	15	0.797338	15	0.671616	15	0.617344	15	0.669402	15	0.620358	15	0.790114	15	0.638288	15	0.484242	15	0.630018	15	0.654595	15	0.733105	15	0.993591	15	0.65644	15	0.482505	15
	20	1.06499	20	0.573472	20	0.588885	20	0.733564	20	0.854281	20	0.555844	20	0.593202	20	0.868716	20	0.510757	20	0.742876	20	0.792534	20	0.759489	20	0.65158	20	0.644605	20	0.516418	20	0.766813	20	0.494083	20	0.682225	20	0.540004	20	0.648452	20	0.562992	20	0.945231	20	0.69902	20	0.491858	20
	25	0.995796	25	0.543227	25	0.613181	25	0.652983	25	0.835339	25	0.597604	25	0.571833	25	0.808137	25	0.61546	25	0.724011	25	0.641213	25	0.767878	25	0.714029	25	0.60059	25	0.511568	25	0.708513	25	0.508674	25	0.544935	25	0.558729	25	0.66607	25	0.502915	25	0.731839	25	0.70367	25	0.488726	25
	30	1.13675	30	0.481015	30	0.606606	30	0.537158	30	0.663418	30	0.490383	30	0.546852	30	0.616386	30	0.613271	30	0.634037	30	0.619641	30	0.721752	30	0.604129	30	0.590415	30	0.531518	30	0.72048	30	0.477951	30	0.647984	30	0.453666	30	0.595844	30	0.485094	30	0.726746	30	0.696888	30	0.496974	30
	35	1.07433	35	0.430282	35	0.488157	35	0.484498	35	0.645002	35	0.41838	35	0.603814	35	0.537903	35	0.58705	35	0.616887	35	0.651681	35	0.715481	35	0.541336	35	0.63017	35	0.478787	35	0.743876	35	0.454818	35	0.760129	35	0.456653	35	0.531866	35	0.45267	35	0.834501	35	0.591942	35	0.6132	35
	40	1.0965	40	0.424581	40	0.423218	40	0.617525	40	0.840841	40	0.4498	40	0.725163	40	0.661705	40	0.606467	40	0.666095	40	0.81128	40	0.721219	40	0.613955	40	0.676808	40	0.487249	40	0.735969	40	0.424989	40	0.597398	40	0.438103	40	0.593706	40	0.484715	40	0.975118	40	0.614616	40	0.618367	40
	45	1.25708	45	0.477613	45	0.452362	45	0.796717	45	0.838674	45	0.526735	45	0.717827	45	0.868073	45	0.698319	45	0.68285	45	0.780003	45	0.817189	45	0.599521	45	0.545451	45	0.509713	45	0.785751	45	0.459321	45	0.606353	45	0.505393	45	0.695786	45	0.568634	45	1.01338	45	0.722285	45	0.632261	45
	50	0.97499	50	0.549755	50	0.544376	50	0.570237	50	0.739312	50	0.545942	50	0.906424	50	0.724527	50	0.680524	50	0.748021	50	0.668656	50	0.892355	50	0.542638	50	0.594958	50	0.575326	50	0.802351	50	0.495821	50	0.616174	50	0.609498	50	0.696804	50	0.574943	50	0.911725	50	0.680558	50	0.73234	50
	55	0.824475	55	0.609237	55	0.586649	55	0.508044	55	0.777156	55	0.546545	55	0.756815	55	0.512777	55	0.691143	55	0.863984	55	0.699933	55	1.01562	55	0.530126	55	0.696942	55	0.629898	55	0.771318	55	0.512299	55	0.624754	55	0.594824	55	0.59115	55	0.54449	55	0.876643	55	0.599348	55	0.628972	55
	60	0.786191	60	0.556886	60	0.541506	60	0.423207	60	0.739999	60	0.562523	60	0.630101	60	0.643201	60	0.717311	60	0.755712	60	0.98027	60	1.0156	60	0.609059	60	0.891271	60	0.807973	60	0.712761	60	0.584821	60	0.408868	60	0.593901	60	0.534435	60	0.52068	60	0.893785	60	0.695821	60	0.483774	60
	65	0.995646	65	0.453847	65	0.511343	65	0.489077	65	0.572389	65	0.442599	65	0.60553	65	0.662185	65	0.525305	65	0.688068	65	0.82115	65	1.06311	65	0.596485	65	0.757228	65	0.602797	65	0.712566	65	0.610736	65	0.533534	65	0.488759	65	0.489323	65	0.55242	65	0.858704	65	0.69979	65	0.458381	65
	70	0.962015	70	0.404627	70	0.5924	70	0.47958	70	0.449741	70	0.394729	70	0.595356	70	0.536423	70	0.470049	70	0.597097	70	0.758957	70	0.885862	70	0.484916	70	0.60733	70	0.484099	70	0.714895	70	0.462707	70	0.567593	70	0.463271	70	0.478158	70	0.582197	70	0.78819	70	0.543144	70	0.507111	70
	75	0.941712	75	0.366539	75	0.580045	75	0.351663	75	0.455211	75	0.386951	75	0.639056	75	0.558105	75	0.469857	75	0.575573	75	0.606045	75	0.931344	75	0.57248	75	0.537381	75	0.528708	75	0.690869	75	0.399068	75	0.474259	75	0.410658	75	0.480166	75	0.555161	75	0.81834	75	0.493618	75	0.46246	75
	80	0.878167	80	0.362911	80	0.585322	80	0.348806	80	0.597002	80	0.359699	80	0.503336	80	0.523336	80	0.482408	80	0.6024	80	0.579986	80	0.896107	80	0.552582	80	0.469324	80	0.599094	80	0.641485	80	0.404522	80	0.540081	80	0.452026	80	0.481303	80	0.47006	80	0.846306	80	0.510018	80	0.519859	80
	85	0.668522	85	0.346536	85	0.683716	85	0.397322	85	0.656467	85	0.366355	85	0.452476	85	0.59596	85	0.529805	85	0.510113	85	0.580636	85	0.792781	85	0.515263	85	0.453514	85	0.590177	85	0.63933	85	0.403644	85	0.474647	85	0.444016	85	0.447252	85	0.419048	85	0.844478	85	0.509216	85	0.392724	85
	90	0.623887	90	0.402266	90	0.695233	90	0.356024	90	0.67517	90	0.348394	90	0.502236	90	0.585754	90	0.539298	90	0.468998	90	0.585774	90	0.842018	90	0.403237	90	0.449496	90	0.663955	90	0.611984	90	0.397361	90	0.406182	90	0.397784	90	0.440531	90	0.37629	90	0.886195	90	0.484697	90	0.375945	90
	95	0.59347	95	0.416276	95	0.700451	95	0.36342	95	0.669659	95	0.301201	95	0.439147	95	0.522934	95	0.478721	95	0.455337	95	0.606565	95	0.926481	95	0.370654	95	0.446628	95	0.851466	95	0.572751	95	0.453905	95	0.397786	95	0.36724	95	0.432298	95	0.33574	95	0.877679	95	0.449902	95	0.414834	95
	100	0.587075	100	0.307233	100	0.653236	100	0.372388	100	0.617956	100	0.282441	100	0.42068	100	0.474492	100	0.454573	100	0.439076	100	0.547473	100	0.862577	100	0.402165	100	0.468531	100	0.696621	100	0.574749	100	0.416818	100	0.334551	100	0.364602	100	0.419473	100	0.349054	100	0.797345	100	0.425671	100	0.377453	100
[truncated: 27 more columns]

## Sheet: Summary
% Chromosome Length		Mean	STDDEV	SEM		Mean	STDDEV	SEM
0-5	IF	1	0	0	FISH	227.016	68.2831	11.3805
5-10		0.813065	0.125913	0.0209855		233.238	74.9888	12.4981
10-15		0.72162	0.191331	0.0318885		247.245	93.506	15.5843
15-20		0.703933	0.185832	0.030972		256.026	93.8939	15.649
20-25		0.679669	0.188383	0.0313972		271.309	103.192	17.1987
25-30		0.637224	0.182764	0.0304607		305.642	131.883	21.9804
30-35		0.626338	0.177409	0.0295681		387.829	272.1	45.35
35-40		0.656806	0.217233	0.0362055		567.374	609.791	101.632
40-45		0.692376	0.248931	0.0414886		808.754	669.829	111.638
45-50		0.689294	0.228415	0.0380692		1103.16	784.338	130.723
50-55		0.702056	0.264046	0.0440077		1239.33	802.36	133.727
55-60		0.711662	0.314207	0.0523678		1169.27	722.058	120.343
60-65		0.675088	0.30082	0.0501367		905.83	659.679	109.946
65-70		0.632973	0.279514	0.0465857		546.952	371.31	61.885
70-75		0.60146	0.241784	0.0402973		370.419	213.27	35.5449
75-80		0.587491	0.216397	0.0360662		296.839	140.565	23.4274
80-85		0.566707	0.236389	0.0393982		262.072	90.6257	15.1043
85-90		0.557825	0.237697	0.0396161		238.678	69.5611	11.5935
90-95		0.545745	0.219646	0.0366077		224.411	57.8415	9.64025
95-100		0.506497	0.204241	0.0340402		215.498	58.3181	9.71968
