# Supplementary material for: Large domains of heterochromatin direct the formation of short mitotic chromosome loops
Source: eLife. 2020 Sep 11;9:e57212. doi: 10.7554/eLife.57212 (PMC7515631; doi:10.7554/eLife.57212)
Supplement: Figure 5—figure supplement 1—source data 3. [file elife-57212-fig5-figsupp1-data3.xlsx]

## Sheet: FISH Binned
	2	FISH	3	FISH	4	FISH	5	FISH	6	FISH	13	FISH	15	FISH	17	FISH	19	FISH	22	FISH	24	FISH	25A	FISH	25B	FISH	26	FISH	28	FISH	29	FISH	30	FISH	31	FISH	33	FISH	34	FISH	35	FISH	36	FISH	39A	FISH	39B	FISH
X	X	Y	X	Y	X	Y	X	Y	X	Y	X	Y	X	Y	X	Y	X	Y	X	Y	X	Y	X	Y	X	Y	X	Y	X	Y	X	Y	X	Y	X	Y	X	Y	X	Y	X	Y	X	Y	X	Y	X	Y
0	0	209	0	134	0	129	0	128	0	141	0	278	0	265	0	240	0	138	0	241	0	133	0	245	0	267	0	198	0	206	0	250	0	241	0	249	0	285	0	232	0	270	0	212	0	254	0	287
0.11	1.14943	212	1.08696	134.063	0.518135	133.489	1.19048	132.645	1.36986	139.171	1.69492	280.04	1.13636	260.24	1.26582	244.39	0.943396	136.017	1.49254	235.73	1.35135	134.261	1.88679	254.97	2.04082	267.37	0.892857	201.41	0.653595	193.39	1.16279	274.82	1.72414	257.45	1.6129	258.66	1.81818	282.19	1.5873	247.13	1.78571	289.27	0.961538	212.98	1.42857	255.12	1.69492	309
0.22	2.29885	212	2.17391	135.853	1.03627	134.619	2.38095	132.753	2.73973	142.679	3.38983	264.56	2.27273	261	2.53165	251.1	1.88679	134.761	2.98507	234.79	2.7027	141.598	3.77358	248.73	4.08163	295.52	1.78571	211.26	1.30719	200.49	2.32558	269.09	3.44828	257.46	3.22581	259.77	3.63636	297	3.1746	259.27	3.57143	283.52	1.92308	221.46	2.85714	278.09	3.38983	304
0.33	3.44828	197	3.26087	133.137	1.5544	134.944	3.57143	131.771	4.10959	139.112	5.08475	271.53	3.40909	261.25	3.79747	248.79	2.83019	140.116	4.47761	236.15	4.05405	134.997	5.66038	259.08	6.12245	285.47	2.67857	217.26	1.96078	207.56	3.48837	281.44	5.17241	259.43	4.83871	264.52	5.45455	288.6	4.7619	254.81	5.35714	273.03	2.88462	225.39	4.28571	284.29	5.08475	315
0.44	4.5977	204	4.34783	137.522	2.07254	133.808	4.7619	131.472	5.47945	135.911	6.77966	269.97	4.54545	261.73	5.06329	272.05	3.77358	139.558	5.97015	246.3	5.40541	135.602	7.54717	261.28	8.16327	301.39	3.57143	222.42	2.61438	217.45	4.65116	274.63	6.89655	278.13	6.45161	274.76	7.27273	306.11	6.34921	263.56	7.14286	289	3.84615	224.33	5.71429	291.27	6.77966	292
0.55	5.74713	221	5.43478	134.871	2.59067	135.256	5.95238	137.827	6.84932	139.751	8.47458	274.42	5.68182	267.76	6.32911	279.38	4.71698	135.836	7.46269	244.06	6.75676	133.113	9.43396	266.8	10.2041	295.32	4.46429	225.3	3.26797	226.22	5.81395	277.59	8.62069	274.92	8.06452	273.13	9.09091	311.74	7.93651	248.09	8.92857	283.53	4.80769	238.22	7.14286	267.17	8.47458	306
0.66	6.89655	221	6.52174	135.417	3.10881	136.599	7.14286	134.873	8.21918	134.983	10.1695	277.58	6.81818	282.3	7.59494	272.03	5.66038	132.812	8.95522	247.93	8.10811	141.302	11.3208	270.65	12.2449	298.07	5.35714	213.07	3.92157	231.26	6.97674	267.82	10.3448	283.36	9.67742	272.4	10.9091	308.9	9.52381	256.55	10.7143	301.75	5.76923	230	8.57143	250.44	10.1695	323
0.77	8.04598	237	7.6087	137.098	3.62694	133.829	8.33333	133.919	9.58904	137.588	11.8644	285.6	7.95455	291.19	8.86076	262.7	6.60377	131.934	10.4478	245.96	9.45946	143.615	13.2075	282.82	14.2857	310.03	6.25	203.43	4.57516	235.57	8.13953	275.05	12.069	290.83	11.2903	280.85	12.7273	315.69	11.1111	258.83	12.5	304.86	6.73077	227.22	10	256.09	11.8644	310
0.88	9.1954	216	8.69565	137.118	4.14508	129.279	9.52381	136.232	10.9589	134.899	13.5593	290.89	9.09091	305.23	10.1266	256.45	7.54717	133.049	11.9403	251.76	10.8108	139.907	15.0943	274.7	16.3265	354.04	7.14286	212.53	5.22876	228.81	9.30233	268.39	13.7931	289.77	12.9032	268.37	14.5455	321.14	12.6984	252.47	14.2857	317.81	7.69231	225.41	11.4286	227.18	13.5593	317
0.99	10.3448	216	9.78261	134.834	4.66321	125.282	10.7143	133.567	12.3288	136.769	15.2542	294.99	10.2273	309.11	11.3924	243.85	8.49057	135.957	13.4328	256.39	12.1622	138.274	16.9811	259.56	18.3673	353.58	8.03571	217.18	5.88235	253.62	10.4651	273.78	15.5172	295.58	14.5161	287.07	16.3636	319.13	14.2857	250.55	16.0714	348.73	8.65385	228.5	12.8571	270.89	15.2542	319
1.1	11.4943	221	10.8696	133.25	5.18135	130.169	11.9048	131.521	13.6986	148.692	16.9492	308.23	11.3636	332.34	12.6582	248.93	9.43396	133.561	14.9254	265.79	13.5135	138.941	18.8679	295.35	20.4082	350.99	8.92857	216.27	6.53595	248.71	11.6279	271.65	17.2414	302.55	16.129	305.06	18.1818	327.46	15.873	237.66	17.8571	344.69	9.61538	235.85	14.2857	267.08	16.9492	333
1.21	12.6437	216	11.9565	136.801	5.69948	131.966	13.0952	136.327	15.0685	141.334	18.6441	320.49	12.5	295.47	13.9241	241.13	10.3774	137.254	16.4179	267.49	14.8649	138.612	20.7547	295.78	22.449	336.48	9.82143	226.67	7.18954	225.97	12.7907	280.83	18.9655	302.57	17.7419	297.45	20	363.13	17.4603	248.61	19.6429	340.06	10.5769	235.25	15.7143	258.8	18.6441	321
1.32	13.7931	211	13.0435	135.81	6.21762	133.434	14.2857	134.759	16.4384	136.493	20.339	316.28	13.6364	294.63	15.1899	238.39	11.3208	135.218	17.9104	270.64	16.2162	138.109	22.6415	292.05	24.4898	338.99	10.7143	227.01	7.84314	218.68	13.9535	274.02	20.6897	293.94	19.3548	298.9	21.8182	355.7	19.0476	252.35	21.4286	348.71	11.5385	245.22	17.1429	271.09	20.339	361
1.43	14.9425	215	14.1304	133.716	6.73575	131.371	15.4762	131.74	17.8082	139.232	22.0339	316.54	14.7727	300.72	16.4557	238.4	12.2642	134.984	19.403	276.66	17.5676	135.043	24.5283	304.64	26.5306	359.99	11.6071	230.95	8.49673	206.82	15.1163	287.09	22.4138	310.83	20.9677	337	23.6364	376.51	20.6349	253.54	23.2143	360.37	12.5	247.99	18.5714	279.26	22.0339	364
1.54	16.092	208	15.2174	133.37	7.25389	130.287	16.6667	133.582	19.1781	140.408	23.7288	336.97	15.9091	307.23	17.7215	248.35	13.2075	134.617	20.8955	278.94	18.9189	138.37	26.4151	320.68	28.5714	364.36	12.5	229.86	9.15033	203.96	16.2791	292.87	24.1379	307.47	22.5806	340.9	25.4545	352.04	22.2222	246.7	25	375.01	13.4615	249.95	20	288.03	23.7288	364
1.65	17.2414	218	16.3043	138.097	7.77202	135.653	17.8571	134.012	20.5479	141.72	25.4237	346.14	17.0455	311.98	18.9873	254.17	14.1509	135.954	22.3881	296.88	20.2703	138.179	28.3019	328.75	30.6122	383	13.3929	232.79	9.80392	203.66	17.4419	283.15	25.8621	329.22	24.1935	350.5	27.2727	358.49	23.8095	244.04	26.7857	391.36	14.4231	259.74	21.4286	289.09	25.4237	392.62
1.76	18.3908	235	17.3913	139.098	8.29016	127.514	19.0476	134	21.9178	139.749	27.1186	372.46	18.1818	317.42	20.2532	242.39	15.0943	138.352	23.8806	304.76	21.6216	134.354	30.1887	354.97	32.6531	394.78	14.2857	237.54	10.4575	208.34	18.6047	283.59	27.5862	318.55	25.8065	372.85	29.0909	401.71	25.3968	252.83	28.5714	421.33	15.3846	259.74	22.8571	290.2	27.1186	407.79
1.87	19.5402	213	18.4783	138.031	8.80829	132.142	20.2381	133.9	23.2877	139.951	28.8136	382.31	19.3182	320.3	21.519	248.77	16.0377	141.876	25.3731	297.63	22.973	136.42	32.0755	391.07	34.6939	412.11	15.1786	248.18	11.1111	208.5	19.7674	292.81	29.3103	348.97	27.4194	393.95	30.9091	410.27	26.9841	285.71	30.3571	444.88	16.3462	251.7	24.2857	297.04	28.8136	458.88
1.98	20.6897	225	19.5652	135.289	9.32642	132.669	21.4286	132.579	24.6575	141.924	30.5085	403.07	20.4545	318.8	22.7848	250.05	16.9811	138.473	26.8657	303.92	24.3243	136.263	33.9623	418.06	36.7347	443.34	16.0714	249.19	11.7647	213.19	20.9302	292.86	31.0345	368.78	29.0323	388.35	32.7273	425.21	28.5714	262.81	32.1429	458.99	17.3077	254.73	25.7143	321.25	30.5085	502.96
2.09	21.8391	229	20.6522	135.09	9.84456	132.966	22.619	137.229	26.0274	139.192	32.2034	425.75	21.5909	335.44	24.0506	255.81	17.9245	135.453	28.3582	311.35	25.6757	139.841	35.8491	444.51	38.7755	484.95	16.9643	261.33	12.4183	211.23	22.093	299.29	32.7586	375.86	30.6452	422.2	34.5455	460.97	30.1587	263.46	33.9286	506.03	18.2692	245.87	27.1429	328.36	32.2034	564.73
2.2	22.9885	226	21.7391	135.772	10.3627	132.424	23.8095	131.165	27.3973	139.08	33.8983	455.45	22.7273	319.56	25.3165	259.82	18.8679	134.421	29.8507	330.7	27.027	139.251	37.7358	519.88	40.8163	520.18	17.8571	268.92	13.0719	207.2	23.2558	302.66	34.4828	395.21	32.2581	461.05	36.3636	523.24	31.746	290.29	35.7143	560.99	19.2308	241.37	28.5714	333.56	33.8983	666.27
2.31	24.1379	220	22.8261	133.915	10.8808	132.205	25	135.696	28.7671	141.882	35.5932	466.93	23.8636	344.27	26.5823	274.7	19.8113	134.744	31.3433	347.64	28.3784	138.291	39.6226	542.5	42.8571	625.04	18.75	247.63	13.7255	200.28	24.4186	301.43	36.2069	422.14	33.871	565.6	38.1818	568.04	33.3333	297.02	37.5	597.85	20.1923	248.26	30	369.32	35.5932	837.57
2.42	25.2874	227	23.913	135.399	11.399	133.89	26.1905	137.308	30.137	142.751	37.2881	546.73	25	345.4	27.8481	282.25	20.7547	134.359	32.8358	361.77	29.7297	138.798	41.5094	598.87	44.898	734.16	19.6429	222.49	14.3791	210.32	25.5814	314.79	37.931	469.08	35.4839	677.4	40	622.48	34.9206	314.8	39.2857	709.97	21.1538	242.08	31.4286	381.17	37.2881	1102.01
2.53	26.4368	231	25	139.59	11.9171	130.989	27.381	134.224	31.5068	141.969	38.9831	622.51	26.1364	359.11	29.1139	271.99	21.6981	146.044	34.3284	379.17	31.0811	136.882	43.3962	661.41	46.9388	880.17	20.5357	212.56	15.0327	198.42	26.7442	336.51	39.6552	510.82	37.0968	800.08	41.8182	727.74	36.5079	336.16	41.0714	910.99	22.1154	240.27	32.8571	413.44	38.9831	1401.53
2.64	27.5862	239	26.087	136.281	12.4352	129.799	28.5714	133.989	32.8767	146.237	40.678	791.96	27.2727	357.03	30.3797	258.08	22.6415	136.577	35.8209	428.79	32.4324	136.339	45.283	746.12	48.9796	1116.42	21.4286	209.85	15.6863	210.6	27.907	338.16	41.3793	631.32	38.7097	977.86	43.6364	894.18	38.0952	377.81	42.8571	1240.58	23.0769	243.68	34.2857	433.74	40.678	1874.64
2.75	28.7356	256	27.1739	137.517	12.9534	132.522	29.7619	135.448	34.2466	148.774	42.3729	958.18	28.4091	368.93	31.6456	261.92	23.5849	136.422	37.3134	485.41	33.7838	137.183	47.1698	848.98	51.0204	1363.09	22.3214	224.27	16.3399	193.5	29.0698	347.86	43.1034	824.44	40.3226	1225.12	45.4545	1142.64	39.6825	424.21	44.6429	1577.99	24.0385	243.94	35.7143	440.65	42.3729	2295.55
2.86	29.8851	237	28.2609	135.969	13.4715	132.302	30.9524	135.171	35.6164	146.446	44.0678	1147.37	29.5455	388.09	32.9114	274.56	24.5283	133.623	38.806	550.56	35.1351	137.616	49.0566	1055.58	53.0612	1563.31	23.2143	216.17	16.9935	198.44	30.2326	363.16	44.8276	1014.03	41.9355	1383.99	47.2727	1476.59	41.2698	473.05	46.4286	2008.24	25	247.03	37.1429	506.55	44.0678	2705.46
2.97	31.0345	258	29.3478	134.597	13.9896	138.506	32.1429	134.851	36.9863	147.673	45.7627	1360.67	30.6818	387.87	34.1772	281.18	25.4717	136.324	40.2985	652.95	36.4865	138.709	50.9434	1167.04	55.102	1938.21	24.1071	209.92	17.6471	202.6	31.3953	378.3	46.5517	1270.11	43.5484	1649.74	49.0909	1838.47	42.8571	529.2	48.2143	2423.98	25.9615	244.4	38.5714	544.91	45.7627	3207.62
3.08	32.1839	252	30.4348	137.838	14.5078	130.565	33.3333	140.689	38.3562	148.996	47.4576	1625.06	31.8182	395.64	35.443	290.34	26.4151	137.812	41.791	686.04	37.8378	145.263	52.8302	1364.05	57.1429	2226.47	25	213.06	18.3007	198.16	32.5581	402.01	48.2759	1497.14	45.1613	1935.09	50.9091	2180.03	44.4444	600.72	50	3007.91	26.9231	248.27	40	631.1	47.4576	3520.6
3.19	33.3333	243	31.5217	137.172	15.0259	127.724	34.5238	133.526	39.726	153.633	49.1525	1944.87	32.9545	437.62	36.7089	297.14	27.3585	140.153	43.2836	672.02	39.1892	143.478	54.717	1562.92	59.1837	2477.26	25.8929	211.56	18.9542	210.34	33.7209	414.97	50	1676.07	46.7742	2248.88	52.7273	2622.15	46.0317	700.51	51.7857	3381.5	27.8846	248.27	41.4286	793.38	49.1525	3697.07
3.3	34.4828	267	32.6087	137.938	15.544	132.635	35.7143	135.582	41.0959	150.042	50.8475	2363.74	34.0909	440.99	37.9747	315.34	28.3019	139.629	44.7761	694.47	40.5405	140.252	56.6038	1842.37	61.2245	2779.23	26.7857	223.63	19.6078	217.92	34.8837	428.89	51.7241	1917.05	48.3871	2461.96	54.5455	3178.12	47.619	850.51	53.5714	3742.99	28.8462	238.29	42.8571	1000.68	50.8475	3843.97
3.41	35.6322	260	33.6957	136.388	16.0622	129.5	36.9048	136.854	42.4658	152.304	52.5424	2711.9	35.2273	475.57	39.2405	308.68	29.2453	137.597	46.2687	764.42	41.8919	141.967	58.4906	2037.42	63.2653	3095.36	27.6786	222.39	20.2614	222.4	36.0465	447.83	53.4483	2208.39	50	2546.78	56.3636	3650.69	49.2063	977.03	55.3571	4121.01	29.8077	236.71	44.2857	1208.67	52.5424	3986.4
3.52	36.7816	253	34.7826	137.442	16.5803	127.626	38.0952	138.755	43.8356	153.321	54.2373	3058.91	36.3636	478.43	40.5063	313.72	30.1887	134.142	47.7612	864.67	43.2432	139.657	60.3774	2208.33	65.3061	3299.63	28.5714	224.43	20.915	222.86	37.2093	464.16	55.1724	2546.2	51.6129	2557.55	58.1818	4095.49	50.7937	1152.32	57.1429	4397.87	30.7692	247.73	45.7143	1511.97	54.2373	4000.43
3.63	37.931	261	35.8696	138.996	17.0984	132.768	39.2857	137.813	45.2055	147.928	55.9322	3304.82	37.5	475.74	41.7722	329.65	31.1321	137.089	49.2537	959.52	44.5946	141.447	62.2642	2274.38	67.3469	3564.46	29.4643	219.71	21.5686	220.6	38.3721	511.91	56.8966	2781.93	53.2258	2643.65	60	4377.16	52.381	1380.72	58.9286	4413.11	31.7308	245.12	47.1429	1845.53	55.9322	3802.39
3.74	39.0805	266.79	36.9565	138.766	17.6166	129.872	40.4762	136.263	46.5753	148.257	57.6271	3478.04	38.6364	541.65	43.038	327.24	32.0755	138.874	50.7463	1042.58	45.9459	143.404	64.1509	2259.01	69.3878	3446.38	30.3571	212.37	22.2222	232.79	39.5349	578.18	58.6207	2932.68	54.8387	2755.93	61.8182	4405.44	53.9683	1648.34	60.7143	4460.07	32.6923	243.03	48.5714	2170.11	57.6271	3721.29
3.85	40.2299	265.81	38.0435	140.07	18.1347	133.871	41.6667	139.107	47.9452	153.605	59.322	3643.29	39.7727	529.25	44.3038	338.19	33.0189	136.077	52.2388	1153.44	47.2973	145.04	66.0377	2307.68	71.4286	3308.64	31.25	236.09	22.8758	237.61	40.6977	650.22	60.3448	3044.67	56.4516	2670.59	63.6364	4254.68	55.5556	1922.11	62.5	4446.71	33.6538	248.16	50	2481.54	59.322	3513.63
3.96	41.3793	270	39.1304	136.302	18.6528	135.73	42.8571	138.583	49.3151	160.377	61.0169	3722.33	40.9091	534.23	45.5696	368.92	33.9623	139.389	53.7313	1218.4	48.6486	149.923	67.9245	2212.67	73.4694	3163.66	32.1429	243.8	23.5294	233.76	41.8605	739.65	62.069	3019.79	58.0645	2593.88	65.4545	4001.78	57.1429	2165.9	64.2857	4263.03	34.6154	251.85	51.4286	2845.08	61.0169	3328.99
4.07	42.5287	277.58	40.2174	135.827	19.171	133.007	44.0476	139.419	50.6849	163.821	62.7119	3767.99	42.0455	594.73	46.8354	422.28	34.9057	138.463	55.2239	1357.55	50	144.964	69.8113	2155	75.5102	2989.09	33.0357	233.58	24.183	226.96	43.0233	985.01	63.7931	3009.6	59.6774	2586.3	67.2727	3681.5	58.7302	2354.84	66.0714	4000.13	35.5769	263.83	52.8571	3127.82	62.7119	3093.67
4.18	43.6782	282.07	41.3043	136.158	19.6891	126.133	45.2381	139.906	52.0548	166.343	64.4068	3756.7	43.1818	599.13	48.1013	512.28	35.8491	139.438	56.7164	1505.95	51.3514	150.058	71.6981	2060.05	77.551	2634.36	33.9286	237.88	24.8366	227.44	44.186	1295.17	65.5172	2903.95	61.2903	2486.33	69.0909	3177.05	60.3175	2583.77	67.8571	3747.01	36.5385	261.79	54.2857	3496.55	64.4068	2856.41
4.29	44.8276	296.37	42.3913	139.307	20.2073	132.586	46.4286	135.373	53.4247	167.942	66.1017	3605.72	44.3182	620.14	49.3671	616.17	36.7925	137.99	58.209	1627.77	52.7027	151.456	73.5849	1920.95	79.5918	2179.77	34.8214	248.37	25.4902	221.3	45.3488	1608.36	67.2414	2771.38	62.9032	2365.71	70.9091	2636.94	61.9048	2869.13	69.6429	3346.71	37.5	256.48	55.7143	3794.55	66.1017	2632.34
4.4	45.977	322.49	43.4783	139.007	20.7254	132.082	47.619	138.823	54.7945	176.843	67.7966	3303.53	45.4545	648.43	50.6329	673.15	37.7358	138.34	59.7015	1810.75	54.0541	157.283	75.4717	1775.08	81.6327	1751.05	35.7143	256.29	26.1438	216.53	46.5116	1894.87	68.9655	2465.65	64.5161	2141.32	72.7273	2101.96	63.4921	3138.67	71.4286	3028.36	38.4615	261.75	57.1429	3971.34	67.7966	2313.93
4.51	47.1264	335.74	44.5652	135.477	21.2435	131.645	48.8095	136.891	56.1644	197.224	69.4915	2907.01	46.5909	671.45	51.8987	767.4	38.6792	139	61.194	2016.23	55.4054	159.096	77.3585	1667.44	83.6735	1387.71	36.6071	266.91	26.7974	216.4	47.6744	2221.62	70.6897	2217.15	66.129	1942.4	74.5455	1689.71	65.0794	3293.14	73.2143	2499.2	39.4231	267.57	58.5714	4183.22	69.4915	1949.57
4.62	48.2759	329.51	45.6522	139.197	21.7617	136.345	50	140.429	57.5342	211.671	71.1864	2430.8	47.7273	698.32	53.1646	937.08	39.6226	141.01	62.6866	2055.88	56.7568	173.363	79.2453	1383.87	85.7143	1134.95	37.5	272.51	27.451	211.26	48.8372	2445.83	72.4138	1895.98	67.7419	1624.37	76.3636	1414.21	66.6667	3376.97	75	1989.94	40.3846	275.22	60	4184.61	71.1864	1617.29
4.73	49.4253	353.34	46.7391	140.349	22.2798	134.234	51.1905	144.868	58.9041	218.907	72.8814	2011.8	48.8636	777.4	54.4304	1137.71	40.566	137.98	64.1791	2144.03	58.1081	173.7	81.1321	1149.23	87.7551	953.31	38.3929	286.18	28.1046	203.1	50	2648.82	74.1379	1621.94	69.3548	1421.79	78.1818	1188.41	68.254	3346.35	76.7857	1580.38	41.3462	282.74	61.4286	4139.32	72.8814	1311.78
4.84	50.5747	362.78	47.8261	141.67	22.7979	137.385	52.381	142.455	60.274	235.32	74.5763	1730.94	50	745.09	55.6962	1338.06	41.5094	140.69	65.6716	2100.96	59.4595	178.531	83.0189	988.45	89.7959	769.78	39.2857	291.33	28.7582	210.31	51.1628	2758.54	75.8621	1357.07	70.9677	1195.61	80	960.12	69.8413	3307.49	78.5714	1192	42.3077	282.2	62.8571	4094.93	74.5763	1077.61
4.95	51.7241	402.15	48.913	138.41	23.3161	126.172	53.5714	139.944	61.6438	262.895	76.2712	1450.99	51.1364	750.19	56.962	1618.03	42.4528	149.03	67.1642	2052.23	60.8108	195.59	84.9057	848.22	91.8367	617.85	40.1786	295.72	29.4118	213.87	52.3256	2879.32	77.5862	1120.98	72.5806	1020.94	81.8182	836.94	71.4286	3184.63	80.3571	902.36	43.2692	283.55	64.2857	3915.21	76.2712	878.24
5.06	52.8736	443.94	50	139.314	23.8342	126.351	54.7619	138.993	63.0137	280.918	77.9661	1152.69	52.2727	956.55	58.2278	1870.45	43.3962	147.98	68.6567	2218.4	62.1622	203.756	86.7925	727.09	93.8776	526.63	41.0714	293.69	30.0654	207.99	53.4884	2862.08	79.3103	937.41	74.1935	840.43	83.6364	677.03	73.0159	3013.77	82.1429	731.24	44.2308	298.31	65.7143	3665.5	77.9661	776.42
5.17	54.023	458.49	51.087	138.246	24.3523	130.547	55.9524	134.657	64.3836	303.876	79.661	934.85	53.4091	1186.22	59.4937	2086.95	44.3396	146.67	70.1493	2347.16	63.5135	207.018	88.6792	623.32	95.9184	472.88	41.9643	309.61	30.719	213.55	54.6512	2551.88	81.0345	858.89	75.8065	691.25	85.4545	597.52	74.6032	2810	83.9286	598.96	45.1923	329.47	67.1429	3383.01	79.661	669.84
5.28	55.1724	489.47	52.1739	139.198	24.8705	131.041	57.1429	140.497	65.7534	332.857	81.3559	766.1	54.5455	1389.22	60.7595	2144.55	45.283	148.34	71.6418	2408.57	64.8649	218.979	90.566	552.45	97.9592	437.99	42.8571	308.93	31.3725	216.45	55.814	2350.54	82.7586	704.22	77.4194	567.47	87.2727	506.42	76.1905	2384.79	85.7143	511.23	46.1538	331.6	68.5714	3064.69	81.3559	596.5
5.39	56.3218	555.24	53.2609	141.43	25.3886	138.203	58.3333	145.453	67.1233	375.755	83.0508	646.56	55.6818	1604.29	62.0253	2218.55	46.2264	152.35	73.1343	2226.76	66.2162	221.503	92.4528	502.1	100	404.63	43.75	330.81	32.0261	205.64	56.9767	2196.75	84.4828	587.33	79.0323	500.74	89.0909	487.12	77.7778	2025.04	87.5	473.28	47.1154	350.12	70	2607.89	83.0508	542.97
5.5	57.4713	661.94	54.3478	150.673	25.9067	131.415	59.5238	141.744	68.4932	379.687	84.7458	555.34	56.8182	1869.96	63.2911	2238.15	47.1698	152.66	74.6269	1978.47	67.5676	222.416	94.3396	474.81			44.6429	356.43	32.6797	212.13	58.1395	2187.92	86.2069	526.71	80.6452	458.28	90.9091	434.16	79.3651	1695.16	89.2857	460.72	48.0769	346.62	71.4286	2166.75	84.7458	491.25
5.61	58.6207	800.33	55.4348	152.263	26.4249	132.636	60.7143	144.428	69.863	398.972	86.4407	515.17	57.9545	2019.33	64.557	2168.45	48.1132	160.71	76.1194	1849.94	68.9189	226.814	96.2264	427.87			45.5357	390.24	33.3333	214.73	59.3023	2175.83	87.931	474.6	82.2581	418.49	92.7273	393.32	80.9524	1371.1	91.0714	417.73	49.0385	348.46	72.8571	1836.29	86.4407	433.7
5.72	59.7701	1119.5	56.5217	156.353	26.943	135.165	61.9048	148.436	71.2329	394.688	88.1356	463.6	59.0909	2239.12	65.8228	2132.32	49.0566	163.66	77.6119	1724.62	70.2703	235.181	98.1132	394.64			46.4286	426.23	33.9869	212.42	60.4651	2179.11	89.6552	416.3	83.871	384.9	94.5455	381.82	82.5397	1116.58	92.8571	388.12	50	369.99	74.2857	1529.29	88.1356	382.42
5.83	60.9195	1478.24	57.6087	160.442	27.4611	130.244	63.0952	143.807	72.6027	397.89	89.8305	404.74	60.2273	2442.53	67.0886	2104.19	50	170.37	79.1045	1611.47	71.6216	231.772	100	383.49			47.3214	495.32	34.6405	207.5	61.6279	2246.12	91.3793	374.97	85.4839	343.14	96.3636	360.7	84.127	927.51	94.6429	373.53	50.9615	398.61	75.7143	1183.66	89.8305	354.31
5.94	62.069	1935.51	58.6957	166.326	27.9793	127.553	64.2857	152.379	73.9726	404.779	91.5254	394.38	61.3636	2672.15	68.3544	2137.22	50.9434	181.37	80.597	1483.63	72.973	231					48.2143	525.73	35.2941	225.69	62.7907	2259.43	93.1034	367.48	87.0968	343.85	98.1818	357.82	85.7143	745.51	96.4286	354.56	51.9231	409.35	77.1429	936.51	91.5254	348.25
6.05	63.2184	2362.76	59.7826	167.741	28.4974	129.354	65.4762	159.29	75.3425	392.518	93.2203	370.72	62.5	2739.07	69.6203	2133.57	51.8868	182.32	82.0896	1434.99	74.3243	210.75					49.1071	623.55	35.9477	222.2	63.9535	2122.93	94.8276	349.98	88.7097	339.41	100	322.88	87.3016	625.92	98.2143	334.21	52.8846	406.84	78.5714	812.37	93.2203	325.4
6.16	64.3678	2777.93	60.8696	169.714	29.0155	132.592	66.6667	164.718	76.7123	367.725	94.9153	354.88	63.6364	2752.85	70.8861	2032.45	52.8302	195.74	83.5821	1365.8	75.6757	199.156					50	723.04	36.6013	220.83	65.1163	2017.49	96.5517	320.35	90.3226	327.02			88.8889	516.83	100	338.71	53.8462	450.94	80	742.3	94.9153	311.45
6.27	65.5172	3064.09	61.9565	176.571	29.5337	130.538	67.8571	178.529	78.0822	321.591	96.6102	340.11	64.7727	2864.93	72.1519	1951.86	53.7736	210.37	85.0746	1171.41	77.027	197.625					50.8929	853.98	37.2549	214.79	66.2791	1911	98.2759	312.09	91.9355	315.33			90.4762	442.6			54.8077	506	81.4286	632.35	96.6102	299.18
6.38	66.6667	3301.06	63.0435	195.215	30.0518	125.399	69.0476	186.152	79.4521	292.369	98.3051	317.69	65.9091	2783.83	73.4177	1857.43	54.717	202.61	86.5672	1065.59	78.3784	184.651					51.7857	954.83	37.9085	224.45	67.4419	1749.53	100	314.19	93.5484	305.66			92.0635	389.74			55.7692	565.57	82.8571	571.3	98.3051	294.55
6.49	67.8161	3398.62	64.1304	200.843	30.5699	132.593	70.2381	190.66	80.8219	257.331	100	298.72	67.0455	2615.63	74.6835	1799.35	55.6604	207.05	88.0597	991.32	79.7297	174.968					52.6786	1057.93	38.5621	224.59	68.6047	1629.17			95.1613	290.14			93.6508	363.87			56.7308	630.35	84.2857	523.62	100	282.55
6.6	68.9655	3510.29	65.2174	208.115	31.0881	131.278	71.4286	198.727	82.1918	223.237			68.1818	2419.4	75.9494	1676.95	56.6038	213.34	89.5522	917.39	81.0811	168.348					53.5714	1164.26	39.2157	221.01	69.7674	1599.96			96.7742	277.49			95.2381	323.39			57.6923	821.14	85.7143	490.47
6.71	70.1149	3510.18	66.3043	211.453	31.6062	126.369	72.619	208.482	83.5616	206.156			69.3182	2225.11	77.2152	1577.8	57.5472	217.35	91.0448	829.55	82.4324	159.708					54.4643	1323.22	39.8693	227.64	70.9302	1558.69			98.3871	271.96			96.8254	308.7			58.6538	1009.9	87.1429	440.55
6.82	71.2644	3665.28	67.3913	217.34	32.1244	130.626	73.8095	215.721	84.9315	195.654			70.4545	1968.79	78.481	1350.02	58.4906	207.61	92.5373	765.56	83.7838	152.406					55.3571	1497.34	40.5229	234.46	72.093	1548.88			100	267.96			98.4127	300.96			59.6154	1294.09	88.5714	409.26
6.93	72.4138	3652.78	68.4783	217.866	32.6425	129.71	75	229.614	86.3014	176.331			71.5909	1776.72	79.7468	1107.88	59.434	209.37	94.0299	651.35	85.1351	150.952					56.25	1621.52	41.1765	231.59	73.2558	1497.23							100	274.73			60.5769	1558.57	90	391.17
7.04	73.5632	3628.7	69.5652	228.027	33.1606	134.527	76.1905	248.469	87.6712	172.274			72.7273	1547.25	81.0127	918.3	60.3774	215.01	95.5224	588.5	86.4865	149.922					57.1429	1717.53	41.8301	231.09	74.4186	1389.05											61.5385	1886.81	91.4286	370.7
7.15	74.7126	3476.12	70.6522	238.934	33.6788	139.256	77.381	259.525	89.0411	169.815			73.8636	1395.22	82.2785	793.57	61.3208	225.38	97.0149	515.72	87.8378	146.264					58.0357	1765.52	42.4837	236.32	75.5814	1179.62											62.5	2304.59	92.8571	349.2
7.26	75.8621	3117.26	71.7391	233.849	34.1969	133.943	78.5714	276.087	90.411	155.608			75	1250.58	83.5443	678.76	62.2642	227.99	98.5075	478.17	89.1892	142.832					58.9286	1714.09	43.1373	241.59	76.7442	1004.06											63.4615	2742.65	94.2857	345.45
7.37	77.0115	2714.93	72.8261	237.643	34.715	134.128	79.7619	295.53	91.7808	152.267			76.1364	1086.02	84.8101	583.74	63.2075	216.95	100	422.01	90.5405	143.183					59.8214	1771.12	43.7908	252.65	77.907	796.59											64.4231	3011.64	95.7143	331.01
7.48	78.1609	2284.21	73.913	240.846	35.2332	132.163	80.9524	292.694	93.1507	156.233			77.2727	935.45	86.0759	518.32	64.1509	224.73			91.8919	144.316					60.7143	1721.96	44.4444	239.82	79.0698	627.7											65.3846	3278.42	97.1429	313.55
7.59	79.3103	1940.96	75	230.871	35.7513	127.666	82.1429	316.631	94.5205	154.021			78.4091	839.77	87.3418	469.23	65.0943	226.31			93.2432	139.549					61.6071	1671.7	45.098	248.48	80.2326	562.73											66.3462	3489.84	98.5714	308.94
7.7	80.4598	1605.02	76.087	227.489	36.2694	127.218	83.3333	318.66	95.8904	143.711			79.5455	733.29	88.6076	418.96	66.0377	223.33			94.5946	139.013					62.5	1573.06	45.7516	256.2	81.3953	446.06											67.3077	3629.31	100	296.36
7.81	81.6092	1327.79	77.1739	216.876	36.7876	127.267	84.5238	314.007	97.2603	145.908			80.6818	647.76	89.8734	433.3	66.9811	218.98			95.9459	143.072					63.3929	1488.64	46.4052	249.78	82.5581	429.14											68.2692	3693.23
7.92	82.7586	1068.24	78.2609	207.234	37.3057	133.376	85.7143	305.957	98.6301	146.584			81.8182	558.14	91.1392	407.83	67.9245	210.535			97.2973	141.284					64.2857	1391.73	47.0588	255.75	83.7209	387.19											69.2308	3707.08
8.03	83.908	833.24	79.3478	197.431	37.8238	135.326	86.9048	297.476	100	141.243			82.9545	461.93	92.4051	381.61	68.8679	198.913			98.6486	142.659					65.1786	1359.52	47.7124	268.29	84.8837	371.58											70.1923	3588.15
8.14	85.0575	652.5	80.4348	190.216	38.342	130.292	88.0952	272.323					84.0909	467.13	93.6709	387.54	69.8113	190.181			100	142.268					66.0714	1253.47	48.366	274.21	86.0465	345.85											71.1538	3379.81
8.25	86.2069	530.9	81.5217	181.935	38.8601	129.943	89.2857	238.349					85.2273	433.29	94.9367	354.61	70.7547	184.025									66.9643	1169.5	49.0196	282.05	87.2093	326.06											72.1154	3036.74
8.36	87.3563	451.16	82.6087	166.643	39.3782	131.814	90.4762	219.601					86.3636	430.8	96.2025	335.72	71.6981	176.216									67.8571	1096.38	49.6732	285.03	88.3721	316.87											73.0769	2854.4
8.47	88.5057	396.02	83.6957	159.448	39.8964	131.29	91.6667	206.049					87.5	420.31	97.4684	315.47	72.6415	169.563									68.75	1012.85	50.3268	304.85	89.5349	306.05											74.0385	2541.48
8.58	89.6552	369.27	84.7826	168.467	40.4145	137.454	92.8571	190.911					88.6364	395.4	98.7342	297.76	73.5849	164.337									69.6429	924.37	50.9804	320.94	90.6977	319.43											75	2302.6
8.69	90.8046	358.74	85.8696	150.437	40.9326	134.603	94.0476	176.037					89.7727	377.17	100	302.67	74.5283	158.318									70.5357	837.92	51.634	333.64	91.8605	294.91											75.9615	2039.35
8.8	91.954	340.26	86.9565	145.717	41.4508	133.67	95.2381	163.822					90.9091	371.04			75.4717	152.363									71.4286	786.6	52.2876	374.98	93.0233	283.04											76.9231	1731.4
8.91	93.1034	294.73	88.0435	141.945	41.9689	127.792	96.4286	163.848					92.0455	355.41			76.4151	153.57									72.3214	686.77	52.9412	426.28	94.186	280.89											77.8846	1416.97
9.02	94.2529	292.57	89.1304	143.081	42.487	131.223	97.619	157.506					93.1818	347.5			77.3585	149.776									73.2143	647.39	53.5948	439.47	95.3488	277.35											78.8462	1184.54
9.13	95.4023	263.18	90.2174	143.873	43.0052	132.896	98.8095	150.666					94.3182	350.71			78.3019	147.887									74.1071	596.81	54.2484	462.52	96.5116	278.58											79.8077	984.39
9.24	96.5517	259.36	91.3043	148.119	43.5233	132.963	100	151.525					95.4545	338.72			79.2453	144.517									75	515.79	54.902	471.9	97.6744	268.24											80.7692	809.42
9.35	97.7011	254.13	92.3913	144.838	44.0415	130.923							96.5909	315.48			80.1887	145.746									75.8929	464.69	55.5556	461.35	98.8372	267.75											81.7308	638.27
9.46	98.8506	239.59	93.4783	135.766	44.5596	130.721							97.7273	300.67			81.1321	142.815									76.7857	427.12	56.2092	512.11	100	262.46											82.6923	558.72
9.57	100	230.13	94.5652	137.809	45.0777	130.407							98.8636	309.97			82.0755	141.129									77.6786	409.85	56.8627	574.97													83.6538	492.99
9.68			95.6522	141.428	45.5959	125.623							100	315.68			83.0189	138.8									78.5714	420.96	57.5163	649.91													84.6154	455.98
9.79			96.7391	140.822	46.114	132.119											83.9623	139.547									79.4643	442.09	58.1699	722.73													85.5769	426.47
9.9			97.8261	137.632	46.6321	132.756											84.9057	134.791									80.3571	456.11	58.8235	863.29													86.5385	396.82
10.01			98.913	139.983	47.1503	131.201											85.8491	135.786									81.25	448.58	59.4771	946.23													87.5	373.24
10.12			100	137.897	47.6684	129.646											86.7925	135.732									82.1429	428.73	60.1307	1064.08													88.4615	351.23
10.23					48.1865	130.595											87.7358	136.313									83.0357	426.09	60.7843	1220.57													89.4231	331.08
10.34					48.7047	131.149											88.6792	138.45									83.9286	409.49	61.4379	1341.63													90.3846	310.39
10.45					49.2228	135.885											89.6226	142.894									84.8214	401.22	62.0915	1490.05													91.3462	310.21
10.56					49.7409	137.291											90.566	139.516									85.7143	400.65	62.7451	1633.79													92.3077	299.79
10.67					50.2591	135.374											91.5094	139.186									86.6071	416.51	63.3987	1740.07													93.2692	310.54
10.78					50.7772	129.745											92.4528	137.303									87.5	416.71	64.0523	1848.17													94.2308	306.92
10.89					51.2953	133.886											93.3962	133.028									88.3929	415.35	64.7059	1909.41													95.1923	277.67
11					51.8135	131.709											94.3396	132.134									89.2857	420.75	65.3595	2004.77													96.1538	265.96
11.11					52.3316	132.78											95.283	133.295									90.1786	452.71	66.0131	2024.08													97.1154	271.26
11.22					52.8497	138.39											96.2264	135.05									91.0714	421.91	66.6667	2027.88													98.0769	276.88
11.33					53.3679	134.475											97.1698	139.253									91.9643	421.9	67.3203	2073.86													99.0385	257.04
11.44					53.886	137.753											98.1132	145.84									92.8571	426.89	67.9739	2177.68													100	267.15
11.55					54.4041	137.654											99.0566	139.274									93.75	410.21	68.6275	2202.85
11.66					54.9223	137.455											100	136.03									94.6429	403.83	69.281	2272.42
11.77					55.4404	136.849																					95.5357	382.91	69.9346	2334.16
11.88					55.9585	145.999																					96.4286	362.46	70.5882	2315.85
11.99					56.4767	137.66																					97.3214	347.64	71.2418	2270.86
12.1					56.9948	142.997																					98.2143	357.91	71.8954	2292.86
12.21					57.513	138.832																					99.1071	336.35	72.549	2381.41
12.32					58.0311	143.686																					100	336.7	73.2026	2434.61
12.43					58.5492	147.185																							73.8562	2427.16
12.54					59.0674	150.861																							74.5098	2401.92
12.65					59.5855	149.209																							75.1634	2264.62
12.76					60.1036	147.457																							75.817	2139.51
12.87					60.6218	148.403																							76.4706	1989.3
12.98					61.1399	149.609																							77.1242	1938.95
13.09					61.658	157.183																							77.7778	1807.27
13.2					62.1762	158.006																							78.4314	1715.21
13.31					62.6943	169.671																							79.085	1525.67
13.42					63.2124	181.437																							79.7386	1399.55
13.53					63.7306	186.024																							80.3922	1253.33
13.64					64.2487	193.425																							81.0458	1054.84
13.75					64.7668	201.314																							81.6993	936.67
13.86					65.285	214.035																							82.3529	809.81
13.97					65.8031	219.505																							83.0065	719.77
14.08					66.3212	215.056																							83.6601	639.16
14.19					66.8394	220.485																							84.3137	561.04
14.3					67.3575	235.563																							84.9673	486.96
14.41					67.8756	240.674																							85.6209	449.85
14.52					68.3938	246.667																							86.2745	414.56
14.63					68.9119	240.179																							86.9281	390.22
14.74					69.4301	237.533																							87.5817	340.11
14.85					69.9482	230.188																							88.2353	336.92
14.96					70.4663	232.277																							88.8889	314.44
15.07					70.9845	229.017																							89.5425	295.89
15.18					71.5026	231.705																							90.1961	283.77
15.29					72.0207	241.601																							90.8497	273.63
15.4					72.5389	231.635																							91.5033	271.19
15.51					73.057	239.669																							92.1569	281.11
15.62					73.5751	225.473																							92.8105	267.65
15.73					74.0933	227.155																							93.4641	253.94
15.84					74.6114	216.161																							94.1176	264.61
15.95					75.1295	205.018																							94.7712	253.04
16.06					75.6477	201.114																							95.4248	248.45
16.17					76.1658	203.861																							96.0784	245.94
16.28					76.6839	197.386																							96.732	247.74
16.39					77.2021	189.721																							97.3856	247.5
16.5					77.7202	181.229																							98.0392	247.02
16.61					78.2383	185.006																							98.6928	251.38
16.72					78.7565	175.628																							99.3464	237.7
16.83					79.2746	169.528																							100	228.57
16.94					79.7927	172.043
17.05					80.3109	166.632
17.16					80.829	152.365
17.27					81.3472	143.643
17.38					81.8653	144.415
17.49					82.3834	139.222
17.6					82.9016	140.122
17.71					83.4197	134.683
17.82					83.9378	134.314
17.93					84.456	126.994
18.04					84.9741	131.924
18.15					85.4922	131.179
18.26					86.0104	134.77
18.37					86.5285	135.933
18.48					87.0466	131.986
18.59					87.5648	132.492
18.7					88.0829	133.275
18.81					88.601	133.84
18.92					89.1192	134.883
19.03					89.6373	133.204
19.14					90.1554	131.562
19.25					90.6736	132.043
19.36					91.1917	131.262
19.47					91.7098	132.584
19.58					92.228	133.4
19.69					92.7461	132.585
19.8					93.2642	130.446
19.91					93.7824	131.46
20.02					94.3005	132.747
20.13					94.8187	130.247
20.24					95.3368	128.455
20.35					95.8549	132.712
20.46					96.3731	129.414
20.57					96.8912	127.84
20.68					97.4093	132.221
20.79					97.9275	136.64
20.9					98.4456	132.831
21.01					98.9637	133.385
21.12					99.4819	127.108
21.23					100	137.297
	0		0		0		0		0		0		0		0		0		0		0		0		0		0		0		0		0		0		0		0		0		0		0		0
	5	206.8	5	134.915	5	132.61	5	131.328	5	140.49	5	274.2	5	261.844	5	246.07	5	137.381	5	236.917	5	135.964	5	249.567	5	276.63	5	212.608	5	214.743	5	269.996	5	251.97	5	257.988	5	288.063	5	248.303	5	280.93	5	222.397	5	267.875	5	300
	10	223.75	10	135.868	10	131.817	10	135.713	10	137.058	10	271.973	10	286.62	10	271.54	10	133.463	10	246.097	10	138.408	10	262.387	10	293.43	10	214.858	10	223.779	10	272.212	10	270.827	10	273.43	10	302.15	10	256.067	10	281.853	10	229.396	10	266.243	10	304.333
	15	215.8	15	134.894	15	132.578	15	134.043	15	140.12	15	284.69	15	306.454	15	247.59	15	135.605	15	254.975	15	138.934	15	276.735	15	301.14	15	231.63	15	208.437	15	275.07	15	287.987	15	278.763	15	315.243	15	253.95	15	308.14	15	247.63	15	255.31	15	316.667
	20	218.5	20	136.777	20	130.887	20	133.334	20	139.367	20	307.903	20	314.233	20	244.827	20	137.22	20	271.597	20	137.174	20	276.537	20	353.81	20	249.623	20	203.748	20	287.902	20	300.233	20	300.47	20	336.573	20	246.207	20	344.493	20	250.682	20	274.295	20	324.333
	25	225	25	135.953	25	131.839	25	134.114	25	140.836	25	323.263	25	332.694	25	249.255	25	137.405	25	293.527	25	136.304	25	297.49	25	342.153	25	214.305	25	228.053	25	299.06	25	304.08	25	342.8	25	365.113	25	248.093	25	361.363	25	244.21	25	291.09	25	363
	30	238	30	136.791	30	131.967	30	135.333	30	140.051	30	366.97	30	363.712	30	272.19	30	138.303	30	310.9	30	139.045	30	324.715	30	362.175	30	219.13	30	213.253	30	334.33	30	332.247	30	385.05	30	370.747	30	267.117	30	395.9	30	243.828	30	338.123	30	419.763
	35	255	35	137.356	35	131.783	35	136.059	35	144.933	35	428.09	35	415.53	35	268.935	35	137.339	35	362.86	35	136.801	35	388.033	35	396.63	35	235.348	35	211.301	35	397.466	35	379.95	35	482.95	35	432.15	35	291.392	35	469.967	35	247.178	35	399.418	35	577.987
	40	260.197	40	138.534	40	130.636	40	137.251	40	149.187	40	545.39	40	500.128	40	302.875	40	139.156	40	488.253	40	141.267	40	502.297	40	464.145	40	274.644	40	222.65	40	500.52	40	467.347	40	818.447	40	571.253	40	379.393	40	622.937	40	262.284	40	530.803	40	1113.7
	45	278.366	45	137.155	45	132.472	45	138.343	45	151.889	45	965.837	45	587.058	45	327.2	45	144.47	45	676.37	45	140.831	45	630.14	45	626.46	45	315.865	45	238.217	45	917.513	45	823.263	45	1419.62	45	748.133	45	534.323	45	1243.19	45	284.404	45	908.457	45	2291.88
	50	335.27	50	139.788	50	131.667	50	138.284	50	152.542	50	1643.53	50	708.138	50	479.913	50	158.015	50	862.87	50	145.833	50	883.56	50	998.295	50	530.685	50	264.974	50	2163.9	50	1481.11	50	2298.18	50	1485.9	50	842.683	50	2480.04	50	346.043	50	2002.29	50	3475.1
	55	416.84	55	141.772	55	134.922	55	141.338	55	168.737	55	2711.52	55	1005.45	55	878.835	55	190.463	55	1138.14	55	150.94	55	1364.67	55	1463.2	55	1012.88	55	391.822	55	2740.13	55	1933.84	55	2625.98	55	2660.1	55	1393.79	55	3377.47	55	423.622	55	2987.75	55	3943.6
	60	725.296	60	160.625	60	143.698	60	140.588	60	209.267	60	3475.38	60	1933.17	60	1728.37	60	210.944	60	1575.51	60	171.173	60	1939.89	60	2213.98	60	1681.19	60	675.799	60	2227.76	60	2753.6	60	2616.92	60	4041.11	60	2147.62	60	4310.66	60	864.21	60	4033.43	60	3679.1
	65	2138.61	65	185.586	65	169.253	65	147.263	65	270.752	65	3749.01	65	2694.31	65	2192.43	65	222.012	65	2072.05	65	206.336	65	2247.24	65	2937.3	65	1569.42	65	1530.97	65	2201.9	65	3024.69	65	2331.12	65	4345.76	65	2863.86	65	4389.94	65	2300.85	65	4083.52	65	3093.02
	70	3318.52	70	216.56	70	229.989	70	172.172	70	371.818	70	3272.09	70	2510.99	70	2126.82	70	211.375	70	2123.86	70	223.578	70	2225.12	70	3436.82	70	1136.02	70	2139.71	70	1781.43	70	2713.66	70	1662.85	70	3620.11	70	3330.99	70	3697.95	70	3559.58	70	3180.27	70	2298.61
	75	3586.61	75	236.429	75	230.521	75	208.641	75	399.119	75	2057.85	75	1587.71	75	1910.27	75	170.492	75	2240.24	75	227.176	75	1990.5	75	3236.15	75	678.547	75	2360.67	75	1498.46	75	1911.69	75	1018.99	75	2142.87	75	3002.8	75	2505.83	75	2950.53	75	2035.05	75	1335.56
	80	2514.34	80	215.98	80	188.053	80	261.845	80	343.551	80	1179.51	80	969.022	80	1428.16	80	149.623	80	1728.68	80	189.1	80	1608.8	80	2601.07	80	446.75	80	1847.51	80	901.993	80	1138.49	80	586.487	80	1187.58	80	2035	80	1587.44	80	1609.88	80	918.71	80	774.833
	85	1208.57	85	173.342	85	141.431	85	310.498	85	220.594	85	656	85	533.74	85	743.592	85	140.471	85	1428.14	85	160.154	85	995.3	85	1569.38	85	428.37	85	807.697	85	439.34	85	716.813	85	420.557	85	824.697	85	1138.4	85	744.187	85	591.076	85	617.393	85	543.573
	90	479.97	90	145.295	90	133.507	90	278.526	90	172.807	90	461.17	90	411.394	90	459.952	90	137.835	90	1036.43	90	147.493	90	675.205	90	952.68	90	413.994	90	363.141	90	323.708	90	472.537	90	342.133	90	530.353	90	629.42	90	481.743	90	375.768	90	432.863	90	390.143
	95	321.575	95	142.081	95	131.834	95	198.149	95	154.532	95	373.327	95	356.165	95	382.898	95	136.233	95	748.82	95	141.515	95	509.787	95	572.24	95	422.908	95	268.618	95	294.567	95	364.143	95	316.003	95	403.1	95	398.737	95	393.127	95	307.57	95	364.13	95	328.367
	100	249.278	100	139.552	100	131.79	100	157.473	100	144.362	100	318.84	100	316.104	100	312.905	100	138.124	100	501.1	100	142.321	100	402	100	438.5	100	353.995	100	244.288	100	270.876	100	315.543	100	276.887	100	347.133	100	301.945	100	342.493	100	269.327	100	312.465	100	292.093
[truncated: 4 more columns]

## Sheet: IF Binned
	2	IF	3	IF	4	IF	5	IF	6	IF	13	IF	15	IF	17	IF	19	IF	22	IF	24	IF	25A	IF	25B	IF	26	IF	28	IF	29	IF	30	IF	31	IF	33	IF	34	IF	35	IF	36	IF	39A	IF	39B	IF
X	X	Y	X	Y	X	Y	X	Y	X	Y	X	Y	X	Y	X	Y	X	Y	X	Y	X	Y	X	Y	X	Y	X	Y	X	Y	X	Y	X	Y	X	Y	X	Y	X	Y	X	Y	X	Y	X	Y	X	Y
0	0	22128	0	18080	0	20832	0	18304	0	24144	0	20400	0	12800	0	26336	0	10304	0	19808	0	31392	0	29216	0	14880	0	20064	0	13312	0	9040	0	27264	0	18368	0	40592	0	14560	0	13488	0	17632	0	10272	0	19664
0.11	1.63934	23578.8	1.69492	18328.5	0.641026	18654.9	1.85185	19224.3	1.85185	22077	1.88679	20173.8	1.6129	11992.7	1.69492	27293.1	1.05263	11496.5	2.12766	19831	2.38095	34048	1.92308	28712.2	2.17391	16108.4	0.970874	20518.4	0.632911	14306.2	1.23457	9120.45	1.88679	26777.9	1.5873	18755.6	2.22222	39456.4	1.96078	15056	2	13309.3	1.13636	16564.1	1.49254	10826	2	21897.4
0.22	3.27869	22632	3.38983	16719.6	1.28205	17277.1	3.7037	18675.5	3.7037	21832.3	3.77358	19222.9	3.22581	12117.1	3.38983	26301	2.10526	11235.7	4.25532	17745.2	4.7619	31712	3.84615	26472.7	4.34783	18291.3	1.94175	20395.5	1.26582	14193.1	2.46914	9268.29	3.77358	26435.2	3.1746	17797.9	4.44444	39064.4	3.92157	15872	4	13491.5	2.27273	16094.2	2.98507	11493.5	4	21842.5
0.33	4.91803	21122.9	5.08475	15570.1	1.92308	16218.5	5.55556	17317.8	5.55556	21660.5	5.66038	15665.3	4.83871	11504.9	5.08475	25277.5	3.15789	11021.1	6.38298	15532.6	7.14286	28752	5.76923	24550.2	6.52174	19574.7	2.91262	19233.9	1.89873	13123	3.7037	9253.62	5.66038	26302.2	4.7619	18228.5	6.66667	37235.4	5.88235	14480	6	13539.6	3.40909	15797	4.47761	11029.1	6	19630.4
0.44	6.55738	21090	6.77966	14374.7	2.5641	15891	7.40741	16064.3	7.40741	21616.7	7.54717	13610.6	6.45161	10688.5	6.77966	24069.8	4.21053	10116	8.51064	15618.8	9.52381	26224	7.69231	24207.2	8.69565	19141	3.8835	17860.5	2.53165	11787.6	4.93827	8615.81	7.54717	26256.3	6.34921	17273.3	8.88889	34909.2	7.84314	13808	8	13791	4.54545	16435.6	5.97015	11290.2	8	17374.7
0.55	8.19672	19655.4	8.47458	13594.8	3.20513	15925.4	9.25926	14643.6	9.25926	22284.5	9.43396	12278.6	8.06452	10509.9	8.47458	23979.2	5.26316	9230.57	10.6383	14363.4	11.9048	24602.6	9.61538	24314.1	10.8696	18318.8	4.85437	16176	3.16456	10389.8	6.17284	7888.42	9.43396	26102.5	7.93651	16891.1	11.1111	35495.6	9.80392	11360	10	13504.6	5.68182	17391.3	7.46269	11544.6	10	14943.2
0.66	9.83607	19807.6	10.1695	13558.3	3.84615	15603.3	11.1111	13292.5	11.1111	23693.2	11.3208	11970.4	9.67742	10664.5	10.1695	24322.5	6.31579	9130.35	12.766	13275.7	14.2857	23696.3	11.5385	24100.6	13.0435	16318	5.82524	16274.6	3.79747	9495.17	7.40741	7791.19	11.3208	27460.7	9.52381	16059.3	13.3333	36508.9	11.7647	11104	12	13854.9	6.81818	16698.9	8.95522	12282	12	15139.4
0.77	11.4754	20956	11.8644	14989.8	4.48718	14993.7	12.963	12296.6	12.963	25191.3	13.2075	12354.8	11.2903	11160.4	11.8644	25685.5	7.36842	8877.12	14.8936	13307.1	16.6667	23052.8	13.4615	23789.5	15.2174	16430.4	6.79612	15155.8	4.43038	8899.68	8.64198	8270.21	13.2075	28626.8	11.1111	16560.4	15.5556	35707.2	13.7255	9616	14	14327.5	7.95455	15318.4	10.4478	12568	14	13046.4
0.88	13.1148	21510.2	13.5593	15853.6	5.12821	14621.2	14.8148	12606.8	14.8148	24498.9	15.0943	12787.3	12.9032	12101.2	13.5593	27351.8	8.42105	8816.09	17.0213	13792.6	19.0476	20504.5	15.3846	23305.1	17.3913	15300.5	7.76699	14903	5.06329	8515.4	9.87654	8587.06	15.0943	27477.6	12.6984	16148.8	17.7778	34338.6	15.6863	9303.85	16	15008.5	9.09091	14606.6	11.9403	13574.2	16	12480.5
0.99	14.7541	22278.3	15.2542	16615.5	5.76923	13745.8	16.6667	13857.4	16.6667	23469.9	16.9811	12442.6	14.5161	13354.5	15.2542	28608.9	9.47368	8614.09	19.1489	13732.9	21.4286	18045.7	17.3077	22845.2	19.5652	15243.4	8.73786	15080.3	5.6962	8420.62	11.1111	9194.25	16.9811	28037.8	14.2857	15558	20	32160.3	17.6471	8731.15	18	15252.6	10.2273	14082.9	13.4328	13263.6	18	12274.1
1.1	16.3934	20960.3	16.9492	15102.7	6.41026	11879.3	18.5185	14261.8	18.5185	23101.6	18.8679	11778.3	16.129	13921.2	16.9492	29590.6	10.5263	8703.17	21.2766	13703.3	23.8095	16573.8	19.2308	22460.3	21.7391	15052.8	9.70874	15408	6.32911	8298.2	12.3457	9752.39	18.8679	26874.3	15.873	14906.1	22.2222	31086.9	19.6078	8423.61	20	14313.4	11.3636	13427.5	14.9254	13219	20	13569.8
1.21	18.0328	20047	18.6441	14513	7.05128	10853.8	20.3704	14323	20.3704	21882.2	20.7547	10753.2	17.7419	13976.8	18.6441	29642	11.5789	9553.94	23.4043	12978.9	26.1905	16445.1	21.1538	22354.7	23.913	15411.5	10.6796	16441	6.96203	7973.84	13.5802	9665.37	20.7547	27197.8	17.4603	14747.9	24.4444	32551.1	21.5686	9354.87	22	12999.1	12.5	12787.4	16.4179	12000.8	22	13074.9
1.32	19.6721	19806.3	20.339	12965	7.69231	10949.3	22.2222	13381.9	22.2222	22701	22.6415	9929.21	19.3548	13380.9	20.339	27504.9	12.6316	9747.06	25.5319	13547.1	28.5714	16131.1	23.0769	22939	26.087	14688.6	11.6505	17116.8	7.59494	8013.36	14.8148	9367.74	22.6415	27064.2	19.0476	13814.4	26.6667	32038.7	23.5294	9988.6	24	12692.8	13.6364	13126	17.9104	11404.7	24	11758.4
1.43	21.3115	19230.5	22.0339	11915.5	8.33333	10943.1	24.0741	12890.4	24.0741	23418.2	24.5283	9400.85	20.9677	13302.5	22.0339	26279.6	13.6842	9323.91	27.6596	13389.4	30.9524	15885	25	22666.9	28.2609	14482.5	12.6214	17610.9	8.22785	8450.16	16.0494	9595.2	24.5283	27253.8	20.6349	13490.5	28.8889	28922.9	25.4902	9653.16	26	12651.3	14.7727	12137.7	19.403	11539.3	26	11407.9
1.54	22.9508	20563.5	23.7288	11531	8.97436	11383.2	25.9259	11860.1	25.9259	23583.1	26.4151	9264.22	22.5806	13137	23.7288	26468	14.7368	9554.37	29.7872	13409.8	33.3333	15358.5	26.9231	22736.1	30.4348	15445.1	13.5922	17996.2	8.86076	9561.59	17.284	9146.16	26.4151	26137.9	22.2222	13455	31.1111	27043	27.451	9100.46	28	11876.9	15.9091	12201.9	20.8955	10891	28	11131.4
1.65	24.5902	21444.5	25.4237	13393.2	9.61538	11910	27.7778	11705.9	27.7778	23585.1	28.3019	9199.89	24.1935	12296.5	25.4237	25273.2	15.7895	9621.2	31.9149	12922.5	35.7143	15451.4	28.8462	23106.1	32.6087	15121	14.5631	18448	9.49367	10656.5	18.5185	8807.71	28.3019	25361	23.8095	13848.6	33.3333	25136.8	29.4118	8938.88	30	11475	17.0455	12790.9	22.3881	11084	30	11199.8
1.76	26.2295	22041.6	27.1186	14131.5	10.2564	12623.6	29.6296	11700.1	29.6296	22511.3	30.1887	8701.23	25.8065	10773	27.1186	25246.2	16.8421	10427.1	34.0426	13003	38.0952	15935.5	30.7692	23367.8	34.7826	14059.6	15.534	18233	10.1266	12089.6	19.7531	8085.34	30.1887	25106.4	25.3968	13227.9	35.5556	23735.7	31.3725	8697.05	32	11225	18.1818	12790.8	23.8806	11125.1	32	10493.2
1.87	27.8689	20187	28.8136	14193.5	10.8974	13739.8	31.4815	11593.6	31.4815	22313.3	32.0755	8447.42	27.4194	10564	28.8136	24016.9	17.8947	10859.3	36.1702	13499.2	40.4762	16568.4	32.6923	23196.8	36.9565	13522.5	16.5049	17980.8	10.7595	11528	20.9877	7686.97	32.0755	23696	26.9841	13740.8	37.7778	23278.7	33.3333	8843.45	34	10975.5	19.3182	12847.6	25.3731	10674.2	34	10198
1.98	29.5082	21063.7	30.5085	13609.1	11.5385	14886.1	33.3333	11714.3	33.3333	22904.2	33.9623	8307.73	29.0323	9985.73	30.5085	23137.6	18.9474	10511.8	38.2979	13855.5	42.8571	16850.4	34.6154	23517	39.1304	13488.5	17.4757	17034.2	11.3924	11097.2	22.2222	7431.8	33.9623	23164.4	28.5714	14328.5	40	22557.1	35.2941	8714.29	36	10938.8	20.4545	14263.6	26.8657	10112.4	36	9892.14
2.09	31.1475	18850	32.2034	13616.8	12.1795	13557	35.1852	12090.4	35.1852	22132.7	35.8491	7888.77	30.6452	10184.4	32.2034	21692.2	20	9432.98	40.4255	13549.3	45.2381	16355.4	36.5385	23058.7	41.3043	14520.4	18.4466	15343.4	12.0253	11335.9	23.4568	7462.7	35.8491	22458.8	30.1587	14704.9	42.2222	21839	37.2549	8336.59	38	10868.6	21.5909	13371.5	28.3582	10079.7	38	9588.51
2.2	32.7869	18591	33.8983	13917.3	12.8205	13356.8	37.037	12220.7	37.037	19958.7	37.7358	7947.28	32.2581	11117.1	33.8983	22003.7	21.0526	8768.37	42.5532	13164	47.619	16730.7	38.4615	22709.3	43.4783	15298.7	19.4175	13648	12.6582	11048.4	24.6914	7485.76	37.7358	21500.2	31.746	14119.2	44.4444	22296.3	39.2157	8258.41	40	10801.7	22.7273	11963.3	29.8507	10920.8	40	9788.21
2.31	34.4262	17645.9	35.5932	14488.6	13.4615	12689.9	38.8889	13372.7	38.8889	20238.2	39.6226	8182.49	33.871	11440.8	35.5932	21940.4	22.1053	8555.79	44.6809	12510.3	50	18753.3	40.3846	22681.2	45.6522	16051.5	20.3883	13132	13.2911	11062.1	25.9259	7714.05	39.6226	22018.8	33.3333	13961.4	46.6667	22257.1	41.1765	8621.42	42	10995.1	23.8636	11339.4	31.3433	10503.6	42	10270.7
2.42	36.0656	16657.6	37.2881	14717.4	14.1026	12077.1	40.7407	13812.3	40.7407	19734.3	41.5094	8222.29	35.4839	12084.3	37.2881	21864.1	23.1579	8566.72	46.8085	12005.7	52.381	22231.6	42.3077	22472.7	47.8261	17367.9	21.3592	13505.8	13.9241	10746.8	27.1605	7987.89	41.5094	21418.4	34.9206	12843.9	48.8889	21806.5	43.1373	9438.3	44	11386	25	10740.4	32.8358	10362.4	44	10872.5
2.53	37.7049	16058.4	38.9831	15373.9	14.7436	11517.4	42.5926	14211.8	42.5926	19125.7	43.3962	8778.57	37.0968	11200.3	38.9831	22110.8	24.2105	7983.05	48.9362	12213.4	54.7619	23583.2	44.2308	22944.3	50	19008.9	22.3301	13288.4	14.557	10321.7	28.3951	7933.44	43.3962	21605.9	36.5079	13659.2	51.1111	22446.4	45.098	9943.41	46	11745.8	26.1364	10005.2	34.3284	10483.4	46	11462
2.64	39.3443	15632.9	40.678	16272.3	15.3846	11094.8	44.4444	14679.4	44.4444	18277.1	45.283	9031.1	38.7097	10702.9	40.678	22284.5	25.2632	7864.83	51.0638	11759.9	57.1429	23717.4	46.1538	22563	52.1739	19835.1	23.301	13597.5	15.1899	10041.7	29.6296	7530.41	45.283	21018.5	38.0952	13033.5	53.3333	23575.3	47.0588	10164.8	48	12331.4	27.2727	10159.2	35.8209	10017.8	48	12907.7
2.75	40.9836	16040.6	42.3729	17113.9	16.0256	10545.4	46.2963	14975	46.2963	17550.5	47.1698	8632.57	40.3226	9724.67	42.3729	23144.5	26.3158	8072.24	53.1915	12029	59.5238	22903	48.0769	22978.5	54.3478	19679.5	24.2718	13692.9	15.8228	10220.4	30.8642	7839.07	47.1698	20696.4	39.6825	12966.7	55.5556	24250.2	49.0196	10510.9	50	13101.7	28.4091	10098.6	37.3134	10173.3	50	13397.4
2.86	42.623	16049	44.0678	18956.2	16.6667	9878.55	48.1481	14704.4	48.1481	17314.7	49.0566	8665.06	41.9355	9223.52	44.0678	22970.4	27.3684	8611.91	55.3191	12721.7	61.9048	23025.8	50	22797.3	56.5217	19287.7	25.2427	13400.6	16.4557	10188.9	32.0988	8319.09	49.0566	21783.6	41.2698	13515.3	57.7778	24432.8	50.9804	10825.6	52	13547.7	29.5455	9819.98	38.806	11096.5	52	13914.4
2.97	44.2623	15819.9	45.7627	17597.6	17.3077	9638.05	50	15441.1	50	17277.3	50.9434	9251.5	43.5484	9103.64	45.7627	23030.8	28.4211	9683.11	57.4468	12627.4	64.2857	22858.1	51.9231	22653.7	58.6957	19005.2	26.2136	12551.3	17.0886	9854.25	33.3333	8804.97	50.9434	21975.4	42.8571	14097.4	60	24813	52.9412	11114.4	54	13143.5	30.6818	10147.1	40.2985	12143.5	54	13977.2
3.08	45.9016	16088	47.4576	17373.3	17.9487	9959.84	51.8519	15728	51.8519	17167.5	52.8302	9803.2	45.1613	10263.1	47.4576	23629.9	29.4737	10305.3	59.5745	11848	66.6667	20369.5	53.8462	22524.3	60.8696	17899.2	27.1845	11770.4	17.7215	9524	34.5679	9156.43	52.8302	23051	44.4444	14635.8	62.2222	24843.2	54.902	11630	56	13315.3	31.8182	10291.3	41.791	12792.2	56	13364.6
3.19	47.541	16801.6	49.1525	17985.2	18.5897	10338.1	53.7037	15792.6	53.7037	17961.2	54.717	9823.56	46.7742	11745.6	49.1525	24565.4	30.5263	10542.4	61.7021	11327.3	69.0476	18677.5	55.7692	24091.8	63.0435	16335.6	28.1553	11305.1	18.3544	8708.1	35.8025	9568.56	54.717	24927.7	46.0317	13970.9	64.4444	25202.1	56.8627	12661.7	58	13741.9	32.9545	10479.7	43.2836	11530	58	13466.3
3.3	49.1803	17260.9	50.8475	17934.7	19.2308	11105.3	55.5556	16093.6	55.5556	18070.5	56.6038	9830.71	48.3871	13007.9	50.8475	25494.2	31.5789	10262.1	63.8298	10800.9	71.4286	17419.6	57.6923	23718.1	65.2174	15477.6	29.1262	11238.5	18.9873	8221.68	37.037	9648	56.6038	24070.8	47.619	14220	66.6667	26195.7	58.8235	15202.2	60	14694.7	34.0909	10166.4	44.7761	10198	60	12615.4
3.41	50.8197	18371.9	52.5424	17410.5	19.8718	11069	57.4074	16687.2	57.4074	18853.5	58.4906	10759.4	50	12548.5	52.5424	26163.3	32.6316	10234.3	65.9574	10941.7	73.8095	15879.3	59.6154	23669.4	67.3913	14902.5	30.0971	10793	19.6203	8402.33	38.2716	9439.5	58.4906	24722.5	49.2063	14626.4	68.8889	27056.2	60.7843	17388.6	62	14115.6	35.2273	9494.55	46.2687	10029.9	62	11838.7
3.52	52.459	19557.5	54.2373	16549.6	20.5128	10537.2	59.2593	17546.8	59.2593	18964.1	60.3774	11639.9	51.6129	11654.3	54.2373	26324.8	33.6842	9855.54	68.0851	11316.9	76.1905	15199.5	61.5385	22982.4	69.5652	13931.8	31.068	11043.4	20.2532	9227.34	39.5062	8507	60.3774	25547.3	50.7937	14346.9	71.1111	27012	62.7451	18242.5	64	14223.5	36.3636	9131.45	47.7612	9072.39	64	9914.62
3.63	54.0984	21112.2	55.9322	16531.1	21.1538	9331.27	61.1111	18010	61.1111	18564	62.2642	12051	53.2258	10112.3	55.9322	26010.5	34.7368	9484.16	70.2128	11746.1	78.5714	14564.2	63.4615	21924.6	71.7391	14349.4	32.0388	11228.4	20.8861	9540.82	40.7407	8308.33	62.2642	26002.5	52.381	14866.5	73.3333	27143.1	64.7059	18439	66	13527.8	37.5	8759.79	49.2537	10254.1	66	10082.4
3.74	55.7377	22688.7	57.6271	17547.8	21.7949	9007.95	62.963	16417.2	62.963	18736.8	64.1509	11234.5	54.8387	9510.31	57.6271	26370.3	35.7895	9848.58	72.3404	12942.4	80.9524	13441.4	65.3846	21018.3	73.913	14070.8	33.0097	11255.1	21.519	10256.4	41.9753	8329.89	64.1509	24797.1	53.9683	16833.9	75.5556	27172.8	66.6667	15774.1	68	13222.6	38.6364	8056.75	50.7463	9175.76	68	9401.57
3.85	57.377	23800.2	59.322	18505.3	22.4359	8937.5	64.8148	15239.2	64.8148	20321.7	66.0377	9983.75	56.4516	9459.19	59.322	24979.2	36.8421	10089.2	74.4681	14600.8	83.3333	14356.2	67.3077	20914.5	76.087	13063	33.9806	11352	22.1519	10033.6	43.2099	8422.01	66.0377	23652.6	55.5556	18052.2	77.7778	26401	68.6275	13375.8	70	13691.4	39.7727	7683.81	52.2388	9263.68	70	8685.89
3.96	59.0164	25081.8	61.0169	18460.3	23.0769	8872.64	66.6667	16455.8	66.6667	20784.1	67.9245	9338.16	58.0645	10040.5	61.0169	25942.6	37.8947	9831.67	76.5957	15298.6	85.7143	14483.9	69.2308	20573.3	78.2609	13081.6	34.9515	11494.9	22.7848	9206.4	44.4444	8940.49	67.9245	22454.6	57.1429	17404.8	80	24220.1	70.5882	11603.2	72	12933.8	40.9091	7505	53.7313	9519.31	72	8453.44
4.07	60.6557	25454.1	62.7119	17369	23.7179	8373.74	68.5185	15652	68.5185	19623.2	69.8113	8409.79	59.6774	11433.3	62.7119	26913.3	38.9474	9527.22	78.7234	14779.3	88.0952	14179.2	71.1538	20351.3	80.4348	14179.4	35.9223	11926.9	23.4177	8140.56	45.679	8992	69.8113	20969.5	58.7302	17331	82.2222	23397.6	72.549	10765.5	74	12555.3	42.0455	7655.51	55.2239	9959.65	74	8464.05
4.18	62.2951	25567.1	64.4068	16222.1	24.359	8194.11	70.3704	17135.2	70.3704	18110.4	71.6981	8207.91	61.2903	12335.1	64.4068	28867.5	40	9219.78	80.8511	13099	90.4762	14721.9	73.0769	19989.9	82.6087	14880.9	36.8932	11909.6	24.0506	7485.31	46.9136	8755.18	71.6981	20747.3	60.3175	16567.7	84.4444	22203.3	74.5098	11096.9	76	12253.6	43.1818	8098.87	56.7164	9971.14	76	8881.72
4.29	63.9344	24455.2	66.1017	15132.5	25	8065.3	72.2222	18772.3	72.2222	17590	73.5849	7854.03	62.9032	12316.9	66.1017	29116.9	41.0526	9036.96	82.9787	11880.6	92.8571	14804.8	75	19880.4	84.7826	14803.5	37.8641	11595.4	24.6835	7560.37	48.1481	8697.67	73.5849	19379.8	61.9048	16400.7	86.6667	21815.4	76.4706	11064.5	78	12501.4	44.3182	8219.79	58.209	10476.8	78	8830.23
4.4	65.5738	22642.8	67.7966	14488	25.641	8361.35	74.0741	19575.8	74.0741	16460.2	75.4717	7699.2	64.5161	12454	67.7966	29842.6	42.1053	8975.28	85.1064	11576.3	95.2381	16024.6	76.9231	19301.9	86.9565	14913.6	38.835	11231.1	25.3165	7540.61	49.3827	8704	75.4717	19390	63.4921	15802.3	88.8889	20608.8	78.4314	10200.6	80	12515.1	45.4545	8515.23	59.7015	9939.85	80	8697.88
4.51	67.2131	20826	69.4915	13717.9	26.2821	8396.79	75.9259	19306.7	75.9259	16270.5	77.3585	7324.82	66.129	12880.9	69.4915	30532.6	43.1579	8923.26	87.234	10307.8	97.619	16991.4	78.8462	19177.4	89.1304	15431.2	39.8058	10768.5	25.9494	6932.05	50.6173	9591.47	77.3585	18410.7	65.0794	16745	91.1111	19801.9	80.3922	9277.16	82	12923.5	46.5909	8806.45	61.194	10552.4	82	8533.78
4.62	68.8525	19621.2	71.1864	12570.9	26.9231	8763.76	77.7778	18066	77.7778	15373.2	79.2453	6935.53	67.7419	13138	71.1864	29319.7	44.2105	9016.12	89.3617	9368	100	18030.4	80.7692	19137.1	91.3043	16407.1	40.7767	10439.6	26.5823	6791.98	51.8519	10740.6	79.2453	17176.4	66.6667	16566.4	93.3333	19260.3	82.3529	8261.5	84	11709	47.7273	8875.32	62.6866	10425.6	84	8783.38
4.73	70.4918	17925.4	72.8814	12466.2	27.5641	8643.74	79.6296	16102	79.6296	15235.9	81.1321	6524.31	69.3548	13210	72.8814	27627.2	45.2632	9181.46	91.4894	9436.32			82.6923	18754.4	93.4783	15961.2	41.7476	10037.7	27.2152	6518.6	53.0864	11123.9	81.1321	17349.1	68.254	15597.6	95.5556	18850	84.3137	7795.09	86	10572.6	48.8636	8978.47	64.1791	9861.39	86	8970.22
4.84	72.1311	17003.9	74.5763	12913.8	28.2051	9142.06	81.4815	15599	81.4815	14476.8	83.0189	6266.7	70.9677	13239.9	74.5763	26169	46.3158	8915.62	93.617	9591.68			84.6154	18499.8	95.6522	13776.4	42.7184	9990.93	27.8481	6918.06	54.321	11436.8	83.0189	16506.5	69.8413	14717	97.7778	18072.6	86.2745	8077.21	88	10448.2	50	8277.67	65.6716	9463.04	88	9028.47
4.95	73.7705	14977.9	76.2712	12572.9	28.8462	9410.68	83.3333	15182.9	83.3333	14789.6	84.9057	6106.04	72.5806	13593.9	76.2712	24966	47.3684	8784.47	95.7447	8929.12			86.5385	18907.2	97.8261	14169.3	43.6893	10345.8	28.481	6878.62	55.5556	11062.2	84.9057	16929.6	71.4286	14180.1	100	16291.8	88.2353	8190.54	90	9917.28	51.1364	7823.72	67.1642	8849.78	90	9562.67
5.06	75.4098	14437.3	77.9661	13005.3	29.4872	9172.14	85.1852	15530.8	85.1852	14331.3	86.7925	5932.97	74.1935	13353.1	77.9661	26254.7	48.4211	9355.42	97.8723	8599.52			88.4615	19696.4	100	13814.4	44.6602	10840.5	29.1139	7100.54	56.7901	10588.9	86.7925	17072.7	73.0159	12808.6			90.1961	8256.94	92	9315.36	52.2727	7606.54	68.6567	8118.88	92	9928.85
5.17	77.0492	13488.8	79.661	13109.4	30.1282	8473.41	87.037	15293.1	87.037	14682.3	88.6792	6399.39	75.8065	13413.6	79.661	25230.1	49.4737	9760.81	100	8339.68			90.3846	19801.5			45.6311	11179	29.7468	6861.97	58.0247	11096.2	88.6792	17584.8	74.6032	11989.4			92.1569	8155.63	94	9430.72	53.4091	7532.89	70.1493	8112.86	94	10367.9
5.28	78.6885	13281.1	81.3559	13108.2	30.7692	7462.47	88.8889	14756.7	88.8889	14408.5	90.566	6065.68	77.4194	12901.2	81.3559	24545.7	50.5263	9640.9					92.3077	20510			46.6019	11501.8	30.3797	6480.88	59.2593	12293.4	90.566	18090.4	76.1905	10711			94.1176	8428.43	96	9685.44	54.5455	7971.52	71.6418	7300.24	96	10131
5.39	80.3279	13262.5	83.0508	12538.5	31.4103	7642.17	90.7407	14966.7	90.7407	14526.1	92.4528	6812.35	79.0323	11898.8	83.0508	21948.5	51.5789	9357.01					94.2308	20667			47.5728	12261.5	31.0127	5888.05	60.4938	12950.2	92.4528	17695.2	77.7778	10692.9			96.0784	9185.6	98	10887.8	55.6818	8422.29	73.1343	7237.53	98	11369.8
5.5	81.9672	13571.2	84.7458	11300.7	32.0513	7513.63	92.5926	15059.8	92.5926	14905.7	94.3396	7044.5	80.6452	10429.9	84.7458	20618.1	52.6316	8963.07					96.1538	21741.4			48.5437	12826.9	31.6456	5756.68	61.7284	12311.8	94.3396	17830.1	79.3651	10727.4			98.0392	10621.4	100	10621.1	56.8182	9215.97	74.6269	7371.52	100	12232.4
5.61	83.6066	13300.6	86.4407	10754.5	32.6923	7313.86	94.4444	15909	94.4444	15229.5	96.2264	6153.54	82.2581	10817.9	86.4407	20805.1	53.6842	9223.15					98.0769	22083			49.5146	13106.4	32.2785	5974.29	62.963	12104.8	96.2264	18246.9	80.9524	10350.5			100	11148.4			57.9545	9281.9	76.1194	7277.15
5.72	85.2459	13546.5	88.1356	10131.7	33.3333	7426.59	96.2963	17883.9	96.2963	15796.3	98.1132	7097.71	83.871	10349.1	88.1356	20421.4	54.7368	9265.3					100	21653.2			50.4854	13115.1	32.9114	6080.82	64.1975	11683.8	98.1132	18941.5	82.5397	10263.1							59.0909	8415.69	77.6119	6686.52
5.83	86.8852	13120.7	89.8305	9679.78	33.9744	7537.45	98.1481	17744.6	98.1481	16662.1	100	6715.22	85.4839	10392.8	89.8305	20886.9	55.7895	9246.08									51.4563	12596.7	33.5443	6353.65	65.4321	10668.6	100	19588.3	84.127	10508.1							60.2273	7754.11	79.1045	6910.56
5.94	88.5246	12938.7	91.5254	10596.1	34.6154	7564.82	100	17316	100	16051.5			87.0968	10834	91.5254	21745.6	56.8421	9526.12									52.4272	12131.7	34.1772	6588.13	66.6667	10495.2			85.7143	10370.6							61.3636	7296.1	80.597	7252.25
6.05	90.1639	14069.8	93.2203	11379.4	35.2564	7871.34							88.7097	11795.2	93.2203	23096.1	57.8947	10147.9									53.3981	11911.4	34.8101	6999.59	67.9012	9595.36			87.3016	9808.8							62.5	7559.74	82.0896	7396.11
6.16	91.8033	15010.5	94.9153	11863.6	35.8974	7728.29							90.3226	11255.6	94.9153	23380.5	58.9474	10982.7									54.3689	11607.7	35.443	7628.12	69.1358	9013.44			88.8889	10331.4							63.6364	8226.69	83.5821	7339.69
6.27	93.4426	16134.6	96.6102	12003	36.5385	7755.25							91.9355	11238.9	96.6102	23532.9	60	11870.3									55.3398	11572.2	36.0759	7550.24	70.3704	8875.36			90.4762	10304.1							64.7727	8847.19	85.0746	7414.39
6.38	95.082	16665.2	98.3051	12077	37.1795	8116.14							93.5484	10718.5	98.3051	23566.1	61.0526	12227.8									56.3107	11737	36.7089	6754.84	71.6049	8090.08			92.0635	10696.5							65.9091	8875.46	86.5672	7722.17
6.49	96.7213	17167.1	100	12397.3	37.8205	7951.42							95.1613	12452.9	100	23235.5	62.1053	13085.7									57.2816	12189.9	37.3418	6109.86	72.8395	8015.2			93.6508	10028.6							67.0455	9247.79	88.0597	7839.79
6.6	98.3607	16549.1			38.4615	7304.73							96.7742	14104.2			63.1579	13116.5									58.2524	13133.5	37.9747	5666.68	74.0741	8507.04			95.2381	10210.1							68.1818	10525.2	89.5522	7824.14
6.71	100	15477.1			39.1026	6956.03							98.3871	15524.5			64.2105	12824.1									59.2233	13224.2	38.6076	5296.08	75.3086	8678.46			96.8254	10196.5							69.3182	10700.2	91.0448	7796.11
6.82					39.7436	6758.98							100	14368.9			65.2632	12754.5									60.1942	13419.3	39.2405	5268.29	76.5432	9111.23			98.4127	10181							70.4545	10345.3	92.5373	8175.13
6.93					40.3846	6399.38											66.3158	12279.1									61.165	12948.6	39.8734	5545.97	77.7778	9325.4			100	9997.77							71.5909	10025.9	94.0299	8301.27
7.04					41.0256	6194.8											67.3684	12317.5									62.1359	13040.1	40.5063	5733.96	79.0123	8994.52											72.7273	9880.31	95.5224	8119.01
7.15					41.6667	6227.79											68.4211	12179.5									63.1068	13242.1	41.1392	5665.22	80.2469	8672.35											73.8636	10017.3	97.0149	7823.89
7.26					42.3077	6415.22											69.4737	12429.8									64.0777	13474.7	41.7722	5720.51	81.4815	8836.54											75	10332.8	98.5075	7722.71
7.37					42.9487	6269.4											70.5263	13110									65.0485	13272.7	42.4051	5627.88	82.716	9323.11											76.1364	10960.7	100	7877.1
7.48					43.5897	6409.47											71.5789	13028									66.0194	13238.5	43.038	5344.16	83.9506	9627.74											77.2727	11300.2
7.59					44.2308	6462.35											72.6316	12740									66.9903	12675	43.6709	5023.24	85.1852	10244.3											78.4091	10981.6
7.7					44.8718	7165.8											73.6842	13236									67.9612	12558.2	44.3038	4975.91	86.4198	10029.2											79.5455	10641.1
7.81					45.5128	7324.87											74.7368	12180									68.932	12236.6	44.9367	5295.47	87.6543	10034.9											80.6818	10203.8
7.92					46.1538	7686.26											75.7895	10384									69.9029	11967.2	45.5696	5736.13	88.8889	10079.4											81.8182	9865.02
8.03					46.7949	7371.53											76.8421	9388									70.8738	11993.8	46.2025	5766.34	90.1235	9819.06											82.9545	9055.31
8.14					47.4359	7327.48											77.8947	9292									71.8447	12419.4	46.8354	5707.54	91.358	10079.6											84.0909	7837.82
8.25					48.0769	7661.82											78.9474	9304									72.8155	12661.8	47.4684	5593.66	92.5926	9847.52											85.2273	6871.22
8.36					48.7179	7813.34											80	9284									73.7864	12272.7	48.1013	5554.62	93.8272	10093											86.3636	6448.4
8.47					49.359	7516.83											81.0526	9296									74.7573	12133.9	48.7342	5642.33	95.0617	11100.3											87.5	5993.87
8.58					50	7096.19											82.1053	8756									75.7282	11628.3	49.3671	5568.87	96.2963	11525.7											88.6364	5920.44
8.69					50.641	7192.68											83.1579	8316									76.699	10859.9	50	5537.99	97.5309	11699.7											89.7727	5772.41
8.8					51.2821	7148.52											84.2105	7980									77.6699	10443.9	50.6329	5506.96	98.7654	11220.3											90.9091	6045.11
8.91					51.9231	6945.05											85.2632	8040									78.6408	10044.9	51.2658	5553.95	100	10593.5											92.0455	5905.81
9.02					52.5641	6516.21											86.3158	8336									79.6117	9684.21	51.8987	5381.53													93.1818	6406.05
9.13					53.2051	6689.48											87.3684	8940									80.5825	9518.35	52.5316	5421.17													94.3182	6809.5
9.24					53.8462	6827.12											88.4211	8876									81.5534	9141.46	53.1646	5346.7													95.4545	7089.74
9.35					54.4872	6599.49											89.4737	9452									82.5243	9149.28	53.7975	5611.15													96.5909	7547.03
9.46					55.1282	6819.91											90.5263	9872									83.4951	9094.34	54.4304	5589.5													97.7273	7861.59
9.57					55.7692	6806.4											91.5789	9856									84.466	8821.37	55.0633	5524.85													98.8636	8349
9.68					56.4103	7074.87											92.6316	10232									85.4369	8846.76	55.6962	5656.84													100	8250.13
9.79					57.0513	7203.75											93.6842	9968									86.4078	9004.68	56.3291	5766.27
9.9					57.6923	8386.52											94.7368	9136									87.3786	9051.09	56.962	5944.51
10.01					58.3333	8717.88											95.7895	8700									88.3495	8974.4	57.5949	6074.62
10.12					58.9744	9421.19											96.8421	8492									89.3204	8696.47	58.2278	7080.43
10.23					59.6154	9538.21											97.8947	9020									90.2913	8258.03	58.8608	7410.46
10.34					60.2564	9151.24											98.9474	9812									91.2621	8157.58	59.4937	7366.2
10.45					60.8974	8363.19											100	9752									92.233	8276.03	60.1266	7606.03
10.56					61.5385	8356.76																					93.2039	8390.49	60.7595	7733.78
10.67					62.1795	8533.37																					94.1748	8310.55	61.3924	7685.43
10.78					62.8205	8023.79																					95.1456	8152.8	62.0253	7493.58
10.89					63.4615	7647.72																					96.1165	8371.14	62.6582	7075.8
11					64.1026	7466.96																					97.0874	8725.79	63.2911	6993.19
11.11					64.7436	6987.32																					98.0583	9448.35	63.9241	6579.37
11.22					65.3846	6967.31																					99.0291	9918.48	64.557	6824.96
11.33					66.0256	7100.88																					100	10223.3	65.1899	7003.85
11.44					66.6667	7174.91																							65.8228	7447.9
11.55					67.3077	7712.7																							66.4557	7879.25
11.66					67.9487	8686.58																							67.0886	8058.25
11.77					68.5897	8729.69																							67.7215	8698.14
11.88					69.2308	8287.29																							68.3544	8826.21
11.99					69.8718	8444.32																							68.9873	8949.15
12.1					70.5128	8761.65																							69.6203	9312.58
12.21					71.1538	8736.06																							70.2532	9474.61
12.32					71.7949	8239.77																							70.8861	8937.83
12.43					72.4359	7746.69																							71.519	8554.85
12.54					73.0769	7555.09																							72.1519	7621.63
12.65					73.7179	7156.39																							72.7848	7337.97
12.76					74.359	7142.77																							73.4177	7216.85
12.87					75	6528.22																							74.0506	6829.42
12.98					75.641	6415.26																							74.6835	7208.39
13.09					76.2821	5946.82																							75.3165	6961.87
13.2					76.9231	5828.12																							75.9494	7238.13
13.31					77.5641	5620.43																							76.5823	7237.15
13.42					78.2051	5464.05																							77.2152	6957.03
13.53					78.8462	5721.87																							77.8481	6578.57
13.64					79.4872	5687.13																							78.481	6507.67
13.75					80.1282	5565.34																							79.1139	6436.66
13.86					80.7692	5544.1																							79.7468	6348.07
13.97					81.4103	5879.19																							80.3797	6414.14
14.08					82.0513	6219.83																							81.0127	6062.35
14.19					82.6923	6061.63																							81.6456	5592.2
14.3					83.3333	6702.57																							82.2785	5115.53
14.41					83.9744	6616.89																							82.9114	4963.02
14.52					84.6154	5986.54																							83.5443	4921.19
14.63					85.2564	5692.03																							84.1772	4817.94
14.74					85.8974	5548.73																							84.8101	4933.39
14.85					86.5385	5442.77																							85.443	5081.95
14.96					87.1795	5455.61																							86.0759	4951.96
15.07					87.8205	5556.92																							86.7089	4873.81
15.18					88.4615	5462.82																							87.3418	4916.35
15.29					89.1026	6148.41																							87.9747	5444.73
15.4					89.7436	6653.24																							88.6076	5788.76
15.51					90.3846	6605.87																							89.2405	6320.16
15.62					91.0256	7002.07																							89.8734	6875.98
15.73					91.6667	6454.56																							90.5063	6850.57
15.84					92.3077	6025.66																							91.1392	6384.64
15.95					92.9487	5786.54																							91.7722	6173.23
16.06					93.5897	5434.61																							92.4051	5913.61
16.17					94.2308	5375.35																							93.038	5857.62
16.28					94.8718	5177.27																							93.6709	6226.29
16.39					95.5128	5299.15																							94.3038	6551.5
16.5					96.1538	5531.35																							94.9367	7686.56
16.61					96.7949	5835.75																							95.5696	8606.76
16.72					97.4359	6068.29																							96.2025	9078.18
16.83					98.0769	5803.58																							96.8354	8901.51
16.94					98.7179	5750.69																							97.4684	8870.78
17.05					99.359	5570.09																							98.1013	9190.04
17.16					100	5588.79																							98.7342	8861.08
17.27																													99.3671	8181.75
17.38																													100	7133.85
	0		0		0		0		0		0		0		0		0		0		0		0		0		0		0		0		0		0		0		0		0		0		0		0
	5	22365.4	5	17709.4	5	16924.5	5	18734.6	5	22684.4	5	19932.2	5	12103.6	5	26643.4	5	10834.7	5	19128	5	32384	5	28133.6	5	16426.6	5	19041.4	5	11938.3	5	9059.63	5	26825.7	5	18287.5	5	39704.3	5	15162.7	5	13429.6	5	16504.6	5	10905.1	5	21134.6
	10	20184.3	10	14513.2	10	12035.7	10	16008.6	10	21853.9	10	13851.5	10	10621	10	24442.2	10	8933.64	10	15575.7	10	27488	10	24357.2	10	19357.9	10	15364.4	10	8736.21	10	8134.22	10	26220.3	10	16741.3	10	36072.3	10	13216	10	13611.7	10	16003.8	10	11705.6	10	17316.1
	15	21581.5	15	14800.6	15	13056	15	12731.9	15	24461.1	15	12162.6	15	12205.4	15	25786.6	15	9376.49	15	13648.7	15	24149.5	15	23945.1	15	17318.4	15	17522.6	15	11153.7	15	9494.94	15	28043.7	15	16089	15	36002.3	15	10360	15	13895.7	15	13112.3	15	13156.2	15	14376.3
	20	20271.2	20	15410.4	20	10453.6	20	14059.6	20	23285.7	20	12336.1	20	13759.6	20	29280.5	20	10170.5	20	13762.7	20	21778.7	20	22870.2	20	15658.1	20	16447.9	20	9395.17	20	8908.6	20	27463.2	20	14489.5	20	34068.7	20	8819.54	20	14858.2	20	12657.8	20	11648.3	20	12774.8
	25	20412.8	25	12137.2	25	8914.97	25	13531.8	25	22667.1	25	10027.8	25	12912	25	26750.8	25	8661.38	25	13341.1	25	17309.8	25	22653.5	25	15232.1	25	13443.3	25	8931.35	25	7516.81	25	27171.9	25	13598.1	25	31932.8	25	9671.74	25	13335.1	25	12335.6	25	11033.4	25	12801
	30	21097.4	30	13906.1	30	8744.48	30	11755.4	30	23226.5	30	9232.06	30	10440.9	30	24845.4	30	8907.49	30	13448.7	30	16288.1	30	22836.4	30	14585.6	30	12053.2	30	6942.8	30	7791.45	30	25749.5	30	13765.8	30	30480.8	30	9230.83	30	12001	30	10164.7	30	10446.8	30	11246.3
	35	18362.3	35	13714.4	35	7616.8	35	11654	35	22608.8	35	8485.46	35	10914.1	35	22277.8	35	10075.7	35	12962.7	35	15621.7	35	23360.5	35	14875.2	35	11194.5	35	6265.26	35	8529.89	35	23988.9	35	13907.3	35	26089.9	35	8770.25	35	11225.1	35	10271.1	35	10449.8	35	10630.3
	40	16116.3	40	14860	40	7555.27	40	12561.2	40	20776.5	40	8006.18	40	11329.2	40	21971.8	40	9703.3	40	13677.4	40	15693.4	40	22884	40	13505.5	40	11486.3	40	6227.51	40	9290.76	40	21992.6	40	13219.8	40	23190.5	40	8436.43	40	10869.7	40	8625.27	40	10429.2	40	9756.29
	45	15969.9	45	17447.5	45	6443.03	45	14234.5	45	19045.7	45	8500.43	45	9350.61	45	22799.8	45	9034.28	45	13074.5	45	16709.4	45	22699.4	45	14909.6	45	10330.9	45	5423.29	45	8500.18	45	21512.2	45	14082.8	45	22230.8	45	9029.86	45	11061	45	7869.79	45	11665.9	45	10310.5
	50	16716.8	50	17652	50	7474.79	50	15040.2	50	17380.9	50	8776.24	50	11891.3	50	23742	50	9199.56	50	12109.5	50	17279.8	50	22779.6	50	17476.1	50	12175.1	50	5638.44	50	8787.21	50	21166.2	50	14272.5	50	22031.8	50	10206.4	50	12392.9	50	8690.63	50	9785.48	50	12589
	55	19680.6	55	17298.2	55	6876.84	55	15653.9	55	17468.7	55	9626.09	55	10956.4	55	25994.1	55	9289.89	55	11894.5	55	21522.7	55	22658.5	55	19507.8	55	12272.5	55	5493.62	55	10723.2	55	23318.1	55	15349.1	55	23010.9	55	11190	55	13264.3	55	7842.47	55	9319.58	55	13763
	60	23856.9	60	17528	60	7996.09	60	16775.9	60	18629.4	60	10295	60	10311	60	25786.7	60	10354.6	60	12399.1	60	23310.2	60	23826.4	60	19146.5	60	12371.4	60	6353.02	60	11260.2	60	24396.7	60	17596	60	24498.7	60	13932	60	13917.3	60	8833.96	60	10086.9	60	13148.8
	65	25158.8	65	17350.4	65	8066.29	65	16555.5	65	19207.5	65	11641.8	65	12368.6	65	27241.1	65	12624.9	65	11064.1	65	22941.9	65	22453.5	65	17117.4	65	13225	65	7249.02	65	12262.7	65	25449	65	16256.9	65	24952.7	65	18023.4	65	14344.6	65	7936.77	65	10279.8	65	11456.2
	70	21030	70	14446.1	70	7887.96	70	16053.9	70	20203.6	70	9243.9	70	13076.3	70	29830.7	70	12392.1	70	11129.3	70	19523.5	70	20835.4	70	14770.6	70	12658	70	8271.92	70	9943.16	70	22358.9	70	15906.5	70	26625.9	70	14575	70	13480.6	70	9837.18	70	8810.57	70	9389.95
	75	16635.7	75	12650.3	75	7733.33	75	18494.4	75	17386.8	75	8030.97	75	13395.6	75	27705.3	75	12858.8	75	13096.4	75	16649.4	75	20073.9	75	14210.1	75	12296.3	75	7897.69	75	8371.92	75	20063.6	75	12992.7	75	27077.5	75	11155.2	75	13060.2	75	10120.3	75	7505.54	75	8534.46
	80	13735.7	80	12895.8	80	5901.49	80	17824.9	80	15626.6	80	7319.85	80	12737.9	80	25483.6	80	9530.4	80	15039	80	14881.9	80	19453.2	80	13072.3	80	10532.2	80	6783.14	80	9027.4	80	18325.7	80	10710.4	80	25931.3	80	10632.5	80	12423.4	80	10843.3	80	6958.08	80	8803.28
	85	13378.1	85	12315.8	85	6072.01	85	15391	85	14633.2	85	6299.02	85	10532.3	85	22370.8	85	8726.4	85	12489.8	85	13898.8	85	18797.1	85	14621.3	85	9144.96	85	5352.47	85	9114.93	85	16928.4	85	10373.9	85	23273.7	85	8444.58	85	12382.5	85	9240.48	85	7329.35	85	8671.68
	90	13201.9	90	10188.7	90	5745.07	90	15193.5	90	14474	90	6166.18	90	11007.4	90	20704.5	90	8728.8	90	10417.4	90	14331.6	90	19301.8	90	15172.4	90	8914.68	90	5531.71	90	10097	90	17328.7	90	10170.3	90	21212.1	90	8133.88	90	10312.7	90	6201.27	90	7700.12	90	9187.12
	95	15071.6	95	11279.7	95	5982.74	95	15311.8	95	14887.1	95	6640.84	95	11071	95	22740.7	95	9812.8	95	9514	95	14763.4	95	20326.2	95	16184.1	95	8278.54	95	6455.5	95	9959.78	95	17871.9	95	10343.1	95	19531.1	95	8280.33	95	9554.45	95	6291.62	95	8090.84	95	9953.14
	100	16464.6	100	12159.1	100	5680.96	100	17648.2	100	16170	100	6655.49	100	14112.6	100	23444.8	100	9155.2	100	8622.77	100	17015.5	100	21825.9	100	13920	100	9139.98	100	8602.99	100	11227.9	100	18925.6	100	10146.3	100	17738.1	100	10318.4	100	10398.1	100	7819.5	100	7885.68	100	11244.4
[truncated: 4 more columns]

## Sheet: If Normalised
	0		0		0		0		0		0		0		0		0		0		0		0		0		0		0		0		0		0		0		0		0		0		0		0
	5	22365.4	5	17709.4	5	16924.5	5	18734.6	5	22684.4	5	19932.2	5	12103.6	5	26643.4	5	10834.7	5	19128	5	32384	5	28133.6	5	16426.6	5	19041.4	5	11938.3	5	9059.63	5	26825.7	5	18287.5	5	39704.3	5	15162.7	5	13429.6	5	16504.6	5	10905.1	5	21134.6
	10	20184.3	10	14513.2	10	12035.7	10	16008.6	10	21853.9	10	13851.5	10	10621	10	24442.2	10	8933.64	10	15575.7	10	27488	10	24357.2	10	19357.9	10	15364.4	10	8736.21	10	8134.22	10	26220.3	10	16741.3	10	36072.3	10	13216	10	13611.7	10	16003.8	10	11705.6	10	17316.1
	15	21581.5	15	14800.6	15	13056	15	12731.9	15	24461.1	15	12162.6	15	12205.4	15	25786.6	15	9376.49	15	13648.7	15	24149.5	15	23945.1	15	17318.4	15	17522.6	15	11153.7	15	9494.94	15	28043.7	15	16089	15	36002.3	15	10360	15	13895.7	15	13112.3	15	13156.2	15	14376.3
	20	20271.2	20	15410.4	20	10453.6	20	14059.6	20	23285.7	20	12336.1	20	13759.6	20	29280.5	20	10170.5	20	13762.7	20	21778.7	20	22870.2	20	15658.1	20	16447.9	20	9395.17	20	8908.6	20	27463.2	20	14489.5	20	34068.7	20	8819.54	20	14858.2	20	12657.8	20	11648.3	20	12774.8
	25	20412.8	25	12137.2	25	8914.97	25	13531.8	25	22667.1	25	10027.8	25	12912	25	26750.8	25	8661.38	25	13341.1	25	17309.8	25	22653.5	25	15232.1	25	13443.3	25	8931.35	25	7516.81	25	27171.9	25	13598.1	25	31932.8	25	9671.74	25	13335.1	25	12335.6	25	11033.4	25	12801
	30	21097.4	30	13906.1	30	8744.48	30	11755.4	30	23226.5	30	9232.06	30	10440.9	30	24845.4	30	8907.49	30	13448.7	30	16288.1	30	22836.4	30	14585.6	30	12053.2	30	6942.8	30	7791.45	30	25749.5	30	13765.8	30	30480.8	30	9230.83	30	12001	30	10164.7	30	10446.8	30	11246.3
	35	18362.3	35	13714.4	35	7616.8	35	11654	35	22608.8	35	8485.46	35	10914.1	35	22277.8	35	10075.7	35	12962.7	35	15621.7	35	23360.5	35	14875.2	35	11194.5	35	6265.26	35	8529.89	35	23988.9	35	13907.3	35	26089.9	35	8770.25	35	11225.1	35	10271.1	35	10449.8	35	10630.3
	40	16116.3	40	14860	40	7555.27	40	12561.2	40	20776.5	40	8006.18	40	11329.2	40	21971.8	40	9703.3	40	13677.4	40	15693.4	40	22884	40	13505.5	40	11486.3	40	6227.51	40	9290.76	40	21992.6	40	13219.8	40	23190.5	40	8436.43	40	10869.7	40	8625.27	40	10429.2	40	9756.29
	45	15969.9	45	17447.5	45	6443.03	45	14234.5	45	19045.7	45	8500.43	45	9350.61	45	22799.8	45	9034.28	45	13074.5	45	16709.4	45	22699.4	45	14909.6	45	10330.9	45	5423.29	45	8500.18	45	21512.2	45	14082.8	45	22230.8	45	9029.86	45	11061	45	7869.79	45	11665.9	45	10310.5
	50	16716.8	50	17652	50	7474.79	50	15040.2	50	17380.9	50	8776.24	50	11891.3	50	23742	50	9199.56	50	12109.5	50	17279.8	50	22779.6	50	17476.1	50	12175.1	50	5638.44	50	8787.21	50	21166.2	50	14272.5	50	22031.8	50	10206.4	50	12392.9	50	8690.63	50	9785.48	50	12589
	55	19680.6	55	17298.2	55	6876.84	55	15653.9	55	17468.7	55	9626.09	55	10956.4	55	25994.1	55	9289.89	55	11894.5	55	21522.7	55	22658.5	55	19507.8	55	12272.5	55	5493.62	55	10723.2	55	23318.1	55	15349.1	55	23010.9	55	11190	55	13264.3	55	7842.47	55	9319.58	55	13763
	60	23856.9	60	17528	60	7996.09	60	16775.9	60	18629.4	60	10295	60	10311	60	25786.7	60	10354.6	60	12399.1	60	23310.2	60	23826.4	60	19146.5	60	12371.4	60	6353.02	60	11260.2	60	24396.7	60	17596	60	24498.7	60	13932	60	13917.3	60	8833.96	60	10086.9	60	13148.8
	65	25158.8	65	17350.4	65	8066.29	65	16555.5	65	19207.5	65	11641.8	65	12368.6	65	27241.1	65	12624.9	65	11064.1	65	22941.9	65	22453.5	65	17117.4	65	13225	65	7249.02	65	12262.7	65	25449	65	16256.9	65	24952.7	65	18023.4	65	14344.6	65	7936.77	65	10279.8	65	11456.2
	70	21030	70	14446.1	70	7887.96	70	16053.9	70	20203.6	70	9243.9	70	13076.3	70	29830.7	70	12392.1	70	11129.3	70	19523.5	70	20835.4	70	14770.6	70	12658	70	8271.92	70	9943.16	70	22358.9	70	15906.5	70	26625.9	70	14575	70	13480.6	70	9837.18	70	8810.57	70	9389.95
	75	16635.7	75	12650.3	75	7733.33	75	18494.4	75	17386.8	75	8030.97	75	13395.6	75	27705.3	75	12858.8	75	13096.4	75	16649.4	75	20073.9	75	14210.1	75	12296.3	75	7897.69	75	8371.92	75	20063.6	75	12992.7	75	27077.5	75	11155.2	75	13060.2	75	10120.3	75	7505.54	75	8534.46
	80	13735.7	80	12895.8	80	5901.49	80	17824.9	80	15626.6	80	7319.85	80	12737.9	80	25483.6	80	9530.4	80	15039	80	14881.9	80	19453.2	80	13072.3	80	10532.2	80	6783.14	80	9027.4	80	18325.7	80	10710.4	80	25931.3	80	10632.5	80	12423.4	80	10843.3	80	6958.08	80	8803.28
	85	13378.1	85	12315.8	85	6072.01	85	15391	85	14633.2	85	6299.02	85	10532.3	85	22370.8	85	8726.4	85	12489.8	85	13898.8	85	18797.1	85	14621.3	85	9144.96	85	5352.47	85	9114.93	85	16928.4	85	10373.9	85	23273.7	85	8444.58	85	12382.5	85	9240.48	85	7329.35	85	8671.68
	90	13201.9	90	10188.7	90	5745.07	90	15193.5	90	14474	90	6166.18	90	11007.4	90	20704.5	90	8728.8	90	10417.4	90	14331.6	90	19301.8	90	15172.4	90	8914.68	90	5531.71	90	10097	90	17328.7	90	10170.3	90	21212.1	90	8133.88	90	10312.7	90	6201.27	90	7700.12	90	9187.12
	95	15071.6	95	11279.7	95	5982.74	95	15311.8	95	14887.1	95	6640.84	95	11071	95	22740.7	95	9812.8	95	9514	95	14763.4	95	20326.2	95	16184.1	95	8278.54	95	6455.5	95	9959.78	95	17871.9	95	10343.1	95	19531.1	95	8280.33	95	9554.45	95	6291.62	95	8090.84	95	9953.14
	100	16464.6	100	12159.1	100	5680.96	100	17648.2	100	16170	100	6655.49	100	14112.6	100	23444.8	100	9155.2	100	8622.77	100	17015.5	100	21825.9	100	13920	100	9139.98	100	8602.99	100	11227.9	100	18925.6	100	10146.3	100	17738.1	100	10318.4	100	10398.1	100	7819.5	100	7885.68	100	11244.4
	0		0		0		0		0		0		0		0		0		0		0		0		0		0		0		0		0		0		0		0		0		0		0		0
	5	1	5	1	5	1	5	1	5	1	5	1	5	1	5	1	5	1	5	1	5	1	5	1	5	1	5	1	5	1	5	1	5	1	5	1	5	1	5	1	5	1	5	1	5	1	5	1
	10	0.90248	10	0.819521	10	0.711142	10	0.854491	10	0.963388	10	0.69493	10	0.8775	10	0.917384	10	0.824543	10	0.814285	10	0.848814	10	0.865769	10	1.17845	10	0.806892	10	0.731779	10	0.897853	10	0.977434	10	0.915449	10	0.908524	10	0.871614	10	1.01356	10	0.969658	10	1.0734	10	0.819325
	15	0.964949	15	0.835749	15	0.771424	15	0.679595	15	1.07832	15	0.610197	15	1.0084	15	0.967842	15	0.865416	15	0.713545	15	0.745722	15	0.851119	15	1.05429	15	0.920236	15	0.934277	15	1.04805	15	1.04541	15	0.879785	15	0.906761	15	0.683257	15	1.03471	15	0.794465	15	1.20642	15	0.680227
	20	0.906364	20	0.870184	20	0.617663	20	0.750459	20	1.02651	20	0.618902	20	1.13682	20	1.09898	20	0.938697	20	0.719506	20	0.672514	20	0.812914	20	0.953217	20	0.863796	20	0.786976	20	0.983329	20	1.02377	20	0.792316	20	0.858061	20	0.581661	20	1.10638	20	0.766925	20	1.06814	20	0.60445
	25	0.912697	25	0.685353	25	0.52675	25	0.722287	25	0.999238	25	0.503094	25	1.06679	25	1.00403	25	0.799414	25	0.697461	25	0.534516	25	0.805212	25	0.927286	25	0.706004	25	0.748125	25	0.829703	25	1.01291	25	0.743572	25	0.804265	25	0.637865	25	0.992965	25	0.747406	25	1.01176	25	0.60569
	30	0.943306	30	0.785239	30	0.516676	30	0.627467	30	1.0239	30	0.463173	30	0.862623	30	0.932517	30	0.822128	30	0.70309	30	0.502969	30	0.811711	30	0.887926	30	0.632999	30	0.581556	30	0.860018	30	0.959881	30	0.752742	30	0.767695	30	0.608787	30	0.893627	30	0.61587	30	0.95797	30	0.532128
	35	0.821013	35	0.774415	35	0.450046	35	0.622055	35	0.996665	35	0.425716	35	0.901718	35	0.836149	35	0.929951	35	0.677681	35	0.482391	35	0.830341	35	0.905559	35	0.587902	35	0.524803	35	0.941527	35	0.894252	35	0.760484	35	0.657106	35	0.578411	35	0.835852	35	0.622321	35	0.958246	35	0.502981
	40	0.72059	40	0.839102	40	0.446411	40	0.670483	40	0.915894	40	0.40167	40	0.936012	40	0.824661	40	0.895579	40	0.715042	40	0.484605	40	0.813405	40	0.822173	40	0.603228	40	0.521641	40	1.02551	40	0.819834	40	0.722889	40	0.584081	40	0.556395	40	0.809388	40	0.522599	40	0.956355	40	0.461626
	45	0.714042	45	0.985211	45	0.380693	45	0.759798	45	0.839593	45	0.426467	45	0.772545	45	0.855739	45	0.833831	45	0.683527	45	0.515977	45	0.806843	45	0.907648	45	0.54255	45	0.454276	45	0.938248	45	0.801924	45	0.77008	45	0.559909	45	0.595532	45	0.823626	45	0.476825	45	1.06977	45	0.487847
	50	0.74744	50	0.996762	50	0.441655	50	0.802801	50	0.766203	50	0.440305	50	0.982453	50	0.891103	50	0.849085	50	0.633077	50	0.53359	50	0.809695	50	1.06389	50	0.639404	50	0.472297	50	0.96993	50	0.789026	50	0.780449	50	0.554898	50	0.673125	50	0.92281	50	0.526559	50	0.897328	50	0.595659
	55	0.879955	55	0.976786	55	0.406325	55	0.83556	55	0.770075	55	0.482941	55	0.905211	55	0.97563	55	0.857422	55	0.621835	55	0.664609	55	0.805387	55	1.18758	55	0.644519	55	0.460167	55	1.18362	55	0.869244	55	0.839324	55	0.579556	55	0.737996	55	0.987693	55	0.475169	55	0.854605	55	0.651204
	60	1.06669	60	0.989761	60	0.472457	60	0.895448	60	0.821242	60	0.516502	60	0.851892	60	0.967845	60	0.955693	60	0.648214	60	0.719805	60	0.846903	60	1.16558	60	0.649711	60	0.532154	60	1.2429	60	0.909452	60	0.962189	60	0.617028	60	0.918834	60	1.03632	60	0.535243	60	0.924964	60	0.622143
	65	1.1249	65	0.979733	65	0.476605	65	0.883684	65	0.846728	65	0.584069	65	1.02189	65	1.02244	65	1.16523	65	0.578423	65	0.708434	65	0.798101	65	1.04205	65	0.694538	65	0.607206	65	1.35355	65	0.948679	65	0.888962	65	0.628465	65	1.18867	65	1.06814	65	0.480883	65	0.942658	65	0.54206
	70	0.940289	70	0.815733	70	0.466068	70	0.85691	70	0.89064	70	0.463767	70	1.08036	70	1.11963	70	1.14374	70	0.581829	70	0.602876	70	0.740586	70	0.899191	70	0.664764	70	0.692888	70	1.09752	70	0.833488	70	0.869801	70	0.670606	70	0.961242	70	1.0038	70	0.596027	70	0.807928	70	0.444292
	75	0.743814	75	0.71433	75	0.456931	75	0.987181	75	0.766467	75	0.402914	75	1.10674	75	1.03986	75	1.18682	75	0.684671	75	0.514126	75	0.713519	75	0.865068	75	0.645767	75	0.661542	75	0.92409	75	0.747924	75	0.710469	75	0.68198	75	0.735702	75	0.972492	75	0.613181	75	0.688257	75	0.403814
	80	0.614149	80	0.728194	80	0.348695	80	0.951442	80	0.688868	80	0.367237	80	1.0524	80	0.956469	80	0.879621	80	0.786226	80	0.459544	80	0.691459	80	0.795803	80	0.553124	80	0.568183	80	0.996442	80	0.683139	80	0.585669	80	0.65311	80	0.701232	80	0.925075	80	0.656986	80	0.638055	80	0.416533
	85	0.598161	85	0.695438	85	0.358771	85	0.821525	85	0.645077	85	0.316022	85	0.870176	85	0.839637	85	0.805415	85	0.652957	85	0.429188	85	0.668136	85	0.890099	85	0.480268	85	0.448344	85	1.0061	85	0.631052	85	0.567268	85	0.586175	85	0.556933	85	0.922034	85	0.559874	85	0.672101	85	0.410307
	90	0.590284	90	0.575326	90	0.339453	90	0.810986	90	0.638061	90	0.309358	90	0.909424	90	0.777096	90	0.805636	90	0.544613	90	0.442551	90	0.686076	90	0.92365	90	0.468174	90	0.463358	90	1.1145	90	0.645976	90	0.556134	90	0.534252	90	0.536441	90	0.767909	90	0.37573	90	0.706101	90	0.434695
	95	0.673881	95	0.636934	95	0.353496	95	0.817303	95	0.656271	95	0.333171	95	0.91468	95	0.853523	95	0.905686	95	0.497385	95	0.455884	95	0.722487	95	0.98524	95	0.434765	95	0.540738	95	1.09936	95	0.666224	95	0.565582	95	0.491914	95	0.5461	95	0.711448	95	0.381204	95	0.741929	95	0.47094
	100	0.736163	100	0.686592	100	0.335665	100	0.94201	100	0.712822	100	0.333906	100	1.16598	100	0.87995	100	0.844991	100	0.450792	100	0.525428	100	0.775793	100	0.847409	100	0.480006	100	0.72062	100	1.23933	100	0.705501	100	0.554824	100	0.446756	100	0.680516	100	0.774271	100	0.473777	100	0.723116	100	0.532036
[truncated: 4 more columns]

## Sheet: Summary
% Chromosome Length		Mean	STDDEV	SEM		Mean	STDDEV	SEM
0-5	IF	1	0	0	FISH	224.15	56.0268	11.4364
5-10		0.885758	0.107821	0.022009		231.803	60.1177	12.2715
10-15		0.886674	0.151499	0.0309247		236.766	64.4821	13.1624
15-20		0.856605	0.167296	0.0341492		246.697	73.5106	15.0053
20-25		0.792683	0.164946	0.0336694		255.875	81.2433	16.5837
25-30		0.751916	0.164613	0.0336015		274.152	95.5461	19.5033
30-35		0.729899	0.175515	0.0358268		311.019	130.291	26.5956
35-40		0.711215	0.178361	0.0364077		402.637	237.346	48.4481
40-45		0.708437	0.188234	0.0384231		610.894	504.677	103.017
45-50		0.740814	0.183567	0.0374705		1006.19	905.492	184.833
50-55		0.777184	0.208149	0.0424882		1391.57	1167.01	238.214
55-60		0.827873	0.209731	0.0428111		1819.14	1353.85	276.354
60-65		0.857337	0.240951	0.0491839		2123.63	1335.62	272.632
65-70		0.801832	0.2073	0.042315		2065.04	1240.86	253.29
70-75		0.748653	0.202895	0.0414158		1646.78	1031.17	210.486
75-80		0.695736	0.191598	0.0391098		1100.52	720.752	147.123
80-85		0.642961	0.182687	0.0372909		648.055	390.435	79.6971
85-90		0.623158	0.196405	0.040091		427.003	224.667	45.86
90-95		0.644006	0.203262	0.0414907		334.601	144.035	29.401
95-100		0.690344	0.226026	0.0461373		279.975	97.0892	19.8183
