# Supplementary material for: Large domains of heterochromatin direct the formation of short mitotic chromosome loops
Source: eLife. 2020 Sep 11;9:e57212. doi: 10.7554/eLife.57212 (PMC7515631; doi:10.7554/eLife.57212)
Supplement: Figure 5—figure supplement 1—source data 4. [file elife-57212-fig5-figsupp1-data4.xlsx]

## Sheet: FISH_Binned
date	cell_line	protein	test_type	index	i001_X_pcnt	i001_Y	i003_X_pcnt	i003_Y	i004_X_pcnt	i004_Y	i005_X_pcnt	i005_Y	i006_X_pcnt	i006_Y	i007_X_pcnt	i007_Y	i008_X_pcnt	i008_Y	i011_X_pcnt	i011_Y	i012_X_pcnt	i012_Y	i013_X_pcnt	i013_Y	i014_X_pcnt	i014_Y	i017_X_pcnt	i017_Y	i018_X_pcnt	i018_Y	i020_X_pcnt	i020_Y	i021_X_pcnt	i021_Y	i023_X_pcnt	i023_Y	i024_X_pcnt	i024_Y	i025_X_pcnt	i025_Y	i026_X_pcnt	i026_Y	i027_X_pcnt	i027_Y	i028_X_pcnt	i028_Y	i030_X_pcnt	i030_Y	i032A_X_pcnt
181021	NPD5	H3K9me3	FISH	0	0	539	0	1046	0	567	0	981	0	971	0	1179	0	1189	0	1457	0	269	0	415	0	442	0	382	0	1246	0	1030	0	830	0	939	0	1816	0	857	0	722	0	909	0	262	0	779	0
181021	NPD5	H3K9me3	FISH	1	1.88679	591.12	1.75439	1075.61	1.06383	699.88	1.75439	1155.46	1.81818	1156.04	1.81818	1381.86	2.32558	1319.77	1.51515	1867.27	2.08333	306.05	1.11111	407.38	2.04082	479.78	1.72414	433.69	1.92308	1368.78	2.17391	1147.62	1.42857	1020.02	2.12766	1022.75	1.5873	2262.17	1.63934	947.86	1.28205	870.56	2.22222	974.65	1.16279	257.184	1.69492	844	1.96078
181021	NPD5	H3K9me3	FISH	2	3.77358	642.49	3.50877	1084.94	2.12766	846.34	3.50877	1475.14	3.63636	1292.92	3.63636	1595.56	4.65116	1499.2	3.0303	2421.11	4.16667	348.92	2.22222	423.15	4.08163	534.56	3.44828	546.9	3.84615	1681.37	4.34783	1386.87	2.85714	1171.12	4.25532	1214.46	3.1746	2889.76	3.27869	1097.63	2.5641	1014.77	4.44444	1058.3	2.32558	276.708	3.38983	1014	3.92157
181021	NPD5	H3K9me3	FISH	3	5.66038	691.33	5.26316	1060.8	3.19149	953.39	5.26316	1852.16	5.45455	1540.42	5.45455	1897.3	6.97674	1819.33	4.54545	2488.49	6.25	381.22	3.33333	460.4	6.12245	635.08	5.17241	693.83	5.76923	1990.98	6.52174	1610.26	4.28571	1513.15	6.38298	1435.06	4.7619	3579.3	4.91803	1263.17	3.84615	1204.28	6.66667	1168.98	3.48837	288.302	5.08475	1140	5.88235
181021	NPD5	H3K9me3	FISH	4	7.54717	828.65	7.01754	1110.64	4.25532	1073.42	7.01754	2336.15	7.27273	1932.45	7.27273	2261.66	9.30233	2199.78	6.06061	2629.63	8.33333	517.23	4.44444	500.74	8.16327	737.42	6.89655	857.64	7.69231	2399.88	8.69565	1977.71	5.71429	1990.16	8.51064	1835.11	6.34921	4243.09	6.55738	1534.84	5.12821	1385.71	8.88889	1317.49	4.65116	316.849	6.77966	1384	7.84314
181021	NPD5	H3K9me3	FISH	5	9.43396	992.51	8.77193	1176.92	5.31915	1190.73	8.77193	2984.04	9.09091	2503.93	9.09091	2659.83	11.6279	2505.74	7.57576	2629.46	10.4167	668.56	5.55556	530.4	10.2041	916.7	8.62069	1087.37	9.61538	2832.8	10.8696	2408.28	7.14286	2763.13	10.6383	2310.54	7.93651	4823	8.19672	1702.25	6.41026	1678.18	11.1111	1499.1	5.81395	346.868	8.47458	1630	9.80392
181021	NPD5	H3K9me3	FISH	6	11.3208	1169.63	10.5263	1337.16	6.38298	1537.25	10.5263	3587.21	10.9091	3174.31	10.9091	3153.77	13.9535	2664.08	9.09091	2346.66	12.5	876.58	6.66667	594.12	12.2449	1028.15	10.3448	1379.87	11.5385	3439.04	13.0435	2997.69	8.57143	3417.4	12.766	2769.22	9.52381	5762.62	9.83607	2037.22	7.69231	2046	13.3333	1605.23	6.97674	401.188	10.1695	2226	11.7647
181021	NPD5	H3K9me3	FISH	7	13.2075	1420.83	12.2807	1506.68	7.44681	1979.32	12.2807	4236.38	12.7273	3396.28	12.7273	3607.73	16.2791	2768.2	10.6061	2166.38	14.5833	933.09	7.77778	678.87	14.2857	1339.89	12.069	1685.01	13.4615	3934.36	15.2174	3772.04	10	4091.25	14.8936	3129.45	11.1111	6587.07	11.4754	2292.95	8.97436	2521.33	15.5556	1740.24	8.13953	466.475	11.8644	3076	13.7255
181021	NPD5	H3K9me3	FISH	8	15.0943	1611.72	14.0351	1717.67	8.51064	2660.63	14.0351	5060.5	14.5455	3734.61	14.5455	3928.8	18.6047	3205.3	12.1212	2038.09	16.6667	1116.98	8.88889	711.39	16.3265	1905.73	13.7931	1877.43	15.3846	4121.77	17.3913	4562.34	11.4286	4516.6	17.0213	3290.41	12.6984	6890.35	13.1148	2578.48	10.2564	3104.12	17.7778	1907.38	9.30233	546.607	13.5593	3967	15.6863
181021	NPD5	H3K9me3	FISH	9	16.9811	1812.19	15.7895	2046.64	9.57447	3398.33	15.7895	5750.42	16.3636	4076.69	16.3636	3910.99	20.9302	3556.52	13.6364	1989.19	18.75	1267.66	10	752.26	18.3673	2409.46	15.5172	1995.48	17.3077	4171.28	19.5652	5125.85	12.8571	4747.75	19.1489	3067.7	14.2857	6677.61	14.7541	3043.18	11.5385	3829.93	20	2221.67	10.4651	654.693	15.2542	4780	17.6471
181021	NPD5	H3K9me3	FISH	10	18.8679	1975.5	17.5439	2550.38	10.6383	4033.57	17.5439	6516.92	18.1818	4271.82	18.1818	3753.48	23.2558	3958.14	15.1515	2055.92	20.8333	1227.18	11.1111	802.9	20.4082	2860.54	17.2414	1922.45	19.2308	3999.42	21.7391	5792.02	14.2857	4672.76	21.2766	2912.9	15.873	6579.13	16.3934	3372.48	12.8205	4479.94	22.2222	2772.6	11.6279	754.118	16.9492	5164	19.6078
181021	NPD5	H3K9me3	FISH	11	20.7547	2058.42	19.2982	3096.03	11.7021	4404.47	19.2982	7105.68	20	4646.2	20	3371.21	25.5814	4234.89	16.6667	1984.35	22.9167	981.54	12.2222	819.91	22.449	3130.47	18.9655	1784.21	21.1538	3782.4	23.913	6389.9	15.7143	4844.8	23.4043	2933.72	17.4603	6192.71	18.0328	3725.2	14.1026	5019.94	24.4444	3505.44	12.7907	801.085	18.6441	5392	21.5686
181021	NPD5	H3K9me3	FISH	12	22.6415	2082.01	21.0526	3587.02	12.766	4783.1	21.0526	7713.11	21.8182	4911.63	21.8182	3020.58	27.907	4374.63	18.1818	1931.45	25	802.98	13.3333	983.21	24.4898	3435.31	20.6897	1591.19	23.0769	3611.69	26.087	6733.23	17.1429	4693.61	25.5319	2620.35	19.0476	5717.46	19.6721	4010.89	15.3846	5379.65	26.6667	4151.33	13.9535	862.269	20.339	5159	23.5294
181021	NPD5	H3K9me3	FISH	13	24.5283	1902.26	22.807	4044.91	13.8298	4996.64	22.807	8117.19	23.6364	5115.28	23.6364	2741.99	30.2326	4305.84	19.697	1778.59	27.0833	670.82	14.4444	1108.92	26.5306	3611.4	22.4138	1417.57	25	3500.94	28.2609	6898.6	18.5714	4820.22	27.6596	2275.52	20.6349	5133.8	21.3115	4136.08	16.6667	5982.36	28.8889	4775.51	15.1163	891.385	22.0339	5327	25.4902
181021	NPD5	H3K9me3	FISH	14	26.4151	1680.68	24.5614	4410.52	14.8936	5351.67	24.5614	8256.64	25.4545	5397.94	25.4545	2384.68	32.5581	4101.38	21.2121	1608.49	29.1667	553.87	15.5556	1359.35	28.5714	3877.46	24.1379	1220.97	26.9231	3351.82	30.4348	6997.94	20	4808.15	29.7872	1822.97	22.2222	4565.25	22.9508	4403.33	17.9487	6892.77	31.1111	5101.53	16.2791	867.5	23.7288	5181	27.451
181021	NPD5	H3K9me3	FISH	15	28.3019	1479.03	26.3158	4476.23	15.9574	5409.91	26.3158	8112.07	27.2727	5527.89	27.2727	2066.38	34.8837	3850.02	22.7273	1547.49	31.25	511.96	16.6667	1598.4	30.6122	4039.95	25.8621	1104	28.8462	2894.57	32.6087	6992.25	21.4286	4814.61	31.9149	1439.86	23.8095	4114.33	24.5902	4766.81	19.2308	7504.14	33.3333	5392.67	17.4419	835.006	25.4237	4977	29.4118
181021	NPD5	H3K9me3	FISH	16	30.1887	1229.84	28.0702	4135.93	17.0213	5528.62	28.0702	7266.96	29.0909	5436.84	29.0909	1747.16	37.2093	3693.97	24.2424	1586.81	33.3333	447.12	17.7778	1808.12	32.6531	4110.52	27.5862	1056.43	30.7692	2368.44	34.7826	7109.35	22.8571	5055.74	34.0426	1153.63	25.3968	3528.1	26.2295	5120.31	20.5128	8156.71	35.5556	5399.2	18.6047	875.085	27.1186	4419	31.3725
181021	NPD5	H3K9me3	FISH	17	32.0755	1009.18	29.8246	3785.42	18.0851	5440.25	29.8246	6563.77	30.9091	4923.54	30.9091	1618.36	39.5349	3616.8	25.7576	1673.51	35.4167	397.25	18.8889	2038.04	34.6939	4156.56	29.3103	998.91	32.6923	1830.47	36.9565	7217.36	24.2857	4835.02	36.1702	972.24	26.9841	2854.78	27.8689	5164.34	21.7949	8747.5	37.7778	5338.04	19.7674	852.334	28.8136	3918	33.3333
181021	NPD5	H3K9me3	FISH	18	33.9623	849.85	31.5789	3498.99	19.1489	5445.43	31.5789	5472.18	32.7273	4236.13	32.7273	1560.3	41.8605	3558.89	27.2727	1588.03	37.5	335.62	20	2085.44	36.7347	4012.89	31.0345	1004.21	34.6154	1409.04	39.1304	7068.63	25.7143	4315.04	38.2979	800.92	28.5714	2218.6	29.5082	4595.77	23.0769	8802.94	40	5070.35	20.9302	942.155	30.5085	3439	35.2941
181021	NPD5	H3K9me3	FISH	19	35.8491	633.5	33.3333	3039.05	20.2128	5332.83	33.3333	4663.15	34.5455	3563.82	34.5455	1544.04	44.186	3682.06	28.7879	1406.49	39.5833	316.21	21.1111	1991.32	38.7755	3539.12	32.7586	922.26	36.5385	1036.11	41.3043	6580.65	27.1429	3866.51	40.4255	679.19	30.1587	1832.11	31.1475	3935.56	24.359	8522.91	42.2222	4609.32	22.093	1042.34	32.2034	2962	37.2549
181021	NPD5	H3K9me3	FISH	20	37.7358	514.7	35.0877	2655.88	21.2766	5019.08	35.0877	3968.89	36.3636	3144.5	36.3636	1499.47	46.5116	3580.81	30.303	1229.85	41.6667	295.57	22.2222	1819.43	40.8163	3191.72	34.4828	792.93	38.4615	840.25	43.4783	5796.89	28.5714	3262.18	42.5532	626.36	31.746	1608.81	32.7869	3508.89	25.641	7933.91	44.4444	3948.47	23.2558	957.202	33.8983	2333	39.2157
181021	NPD5	H3K9me3	FISH	21	39.6226	450.71	36.8421	2301.02	22.3404	4632.7	36.8421	3328.73	38.1818	2715.68	38.1818	1380.24	48.8372	3475.71	31.8182	1052.83	43.75	292.44	23.3333	1635.54	42.8571	2941.36	36.2069	661.5	40.3846	730.82	45.6522	4754.65	30	3003.69	44.6809	582.04	33.3333	1270.98	34.4262	3124.72	26.9231	7067.16	46.6667	3247.15	24.4186	883.616	35.5932	1875.12	41.1765
181021	NPD5	H3K9me3	FISH	22	41.5094	399.64	38.5965	1849.87	23.4043	4245.4	38.5965	2690.56	40	2547.23	40	1188.3	51.1628	3113.32	33.3333	906.88	45.8333	264.62	24.4444	1337.85	44.898	2791.96	37.931	583.52	42.3077	635.37	47.8261	3761.04	31.4286	3246.12	46.8085	542.13	34.9206	1031.95	36.0656	2648.84	28.2051	6189.53	48.8889	2673.6	25.5814	745.468	37.2881	1555.69	43.1373
181021	NPD5	H3K9me3	FISH	23	43.3962	352.82	40.3509	1452.22	24.4681	4201.24	40.3509	2050.85	41.8182	2298.78	41.8182	1047.01	53.4884	2601.02	34.8485	828.93	47.9167	239.2	25.5556	1041.61	46.9388	2749.71	39.6552	537.46	44.2308	569.83	50	3000.25	32.8571	3297.47	48.9362	481.17	36.5079	896.67	37.7049	2284.01	29.4872	5389.67	51.1111	1945.89	26.7442	616.472	38.9831	1315.37	45.098
181021	NPD5	H3K9me3	FISH	24	45.283	334.02	42.1053	1136.1	25.5319	3871.03	42.1053	1600.56	43.6364	2103.1	43.6364	852.26	55.814	2243.03	36.3636	788.18	50	245.35	26.6667	882.43	48.9796	2612.5	41.3793	503.4	46.1538	545	52.1739	2384.57	34.2857	3341.83	51.0638	444.87	38.0952	810.94	39.3443	1837.23	30.7692	4789.88	53.3333	1536	27.907	513.387	40.678	1099.62	47.0588
181021	NPD5	H3K9me3	FISH	25	47.1698	304.63	43.8596	951.79	26.5957	3644.2	43.8596	1351.31	45.4545	1870.5	45.4545	739	58.1395	1995.97	37.8788	793.71	52.0833	240.51	27.7778	743.83	51.0204	2368.93	43.1034	488	48.0769	507.54	54.3478	2073.53	35.7143	3463.67	53.1915	412.5	39.6825	675.44	40.9836	1413.3	32.0513	4071.83	55.5556	1221.84	29.0698	456.25	42.3729	951.55	49.0196
181021	NPD5	H3K9me3	FISH	26	49.0566	253.33	45.614	793.34	27.6596	3394.24	45.614	1189.58	47.2727	1713.27	47.2727	693.09	60.4651	1835.6	39.3939	808.16	54.1667	229.54	28.8889	657.23	53.0612	2104.02	44.8276	518.86	50	480.55	56.5217	1699.52	37.1429	3764.34	55.3191	393.49	41.2698	582.96	42.623	1159.56	33.3333	3419.1	57.7778	1031.06	30.2326	418.643	44.0678	789.86	50.9804
181021	NPD5	H3K9me3	FISH	27	50.9434	240.95	47.3684	672.92	28.7234	3509.43	47.3684	1019.87	49.0909	1435.75	49.0909	644.58	62.7907	1577.24	40.9091	795.14	56.25	223.61	30	599.73	55.102	2074.02	46.5517	498.49	51.9231	463.17	58.6957	1454.86	38.5714	3843.16	57.4468	364.22	42.8571	567.84	44.2623	966.73	34.6154	2814.65	60	935.95	31.3953	422.591	45.7627	665.71	52.9412
181021	NPD5	H3K9me3	FISH	28	52.8302	231.98	49.1228	599.15	29.7872	3827.34	49.1228	863.85	50.9091	1184.34	50.9091	550.36	65.1163	1360.68	42.4242	792.59	58.3333	213.67	31.1111	556.56	57.1429	2120.93	48.2759	521.99	53.8462	448.18	60.8696	1196.98	40	4017.84	59.5745	375.9	44.4444	540.43	45.9016	787.55	35.8974	2660.16	62.2222	836.82	32.5581	384.807	47.4576	593.7	54.902
181021	NPD5	H3K9me3	FISH	29	54.717	230.88	50.8772	540.33	30.8511	3799.99	50.8772	791.06	52.7273	1072.33	52.7273	484.95	67.4419	1047.96	43.9394	768.48	60.4167	206.53	32.2222	519.99	59.1837	2040.38	50	531.58	55.7692	433.22	63.0435	1045.08	41.4286	4185.83	61.7021	367.28	46.0317	458.42	47.541	763.43	37.1795	2312.44	64.4444	749.23	33.7209	332.665	49.1525	573.02	56.8627
181021	NPD5	H3K9me3	FISH	30	56.6038	208.23	52.6316	462.99	31.9149	3777.93	52.6316	683.09	54.5455	931.13	54.5455	416.07	69.7674	883.6	45.4545	690.87	62.5	196.61	33.3333	539.19	61.2245	1930.54	51.7241	549.38	57.6923	407.84	65.2174	945.66	42.8571	4279.39	63.8298	354.2	47.619	421.49	49.1803	625.29	38.4615	1998.34	66.6667	692.55	34.8837	301.809	50.8475	556.78	58.8235
181021	NPD5	H3K9me3	FISH	31	58.4906	195.72	54.386	412.93	32.9787	3187.43	54.386	655.21	56.3636	729.83	56.3636	392.11	72.093	799.38	46.9697	594.8	64.5833	194.17	34.4444	469.35	63.2653	1636.18	53.4483	506.88	59.6154	387.03	67.3913	893.45	44.2857	4318.73	65.9574	334.37	49.2063	402.3	50.8197	539.99	39.7436	1648.89	68.8889	617.49	36.0465	287.183	52.5424	528	60.7843
181021	NPD5	H3K9me3	FISH	32	60.3774	186.52	56.1404	374.42	34.0426	2839.18	56.1404	597.31	58.1818	664.01	58.1818	377.69	74.4186	655.8	48.4848	540.32	66.6667	192.31	35.5556	441.75	65.3061	1392.68	55.1724	439.2	61.5385	368.57	69.5652	807.77	45.7143	4163.88	68.0851	356.26	50.7937	376.38	52.459	504	41.0256	1367.83	71.1111	567.2	37.2093	269.129	54.2373	518.93	62.7451
181021	NPD5	H3K9me3	FISH	33	62.2642	187.42	57.8947	351.2	35.1064	2371.09	57.8947	556.19	60	620.51	60	334.08	76.7442	619.53	50	501.35	68.75	184.85	36.6667	399.38	67.3469	1213.98	56.8966	386.53	63.4615	352.58	71.7391	720.76	47.1429	3713.06	70.2128	356.34	52.381	371.49	54.0984	470.27	42.3077	1148.46	73.3333	521.94	38.3721	261.101	55.9322	524.57	64.7059
181021	NPD5	H3K9me3	FISH	34	64.1509	180.12	59.6491	352.66	36.1702	1901.59	59.6491	462.07	61.8182	582.61	61.8182	317.57	79.0698	599.5	51.5152	467.51	70.8333	182.65	37.7778	394.26	69.3878	1143.59	58.6207	362.18	65.3846	356.27	73.913	674.25	48.5714	2938.96	72.3404	343.53	53.9683	368.83	55.7377	440.95	43.5897	975.06	75.5556	470.43	39.5349	255.351	57.6271	484.86	66.6667
181021	NPD5	H3K9me3	FISH	35	66.0377	182.09	61.4035	350.67	37.234	1644.17	61.4035	459.26	63.6364	550.35	63.6364	326.3	81.3953	579.25	53.0303	442.26	72.9167	180.07	38.8889	377.78	71.4286	1047.04	60.3448	343.78	67.3077	340.34	76.087	679.05	50	2264.77	74.4681	324	55.5556	359.23	57.377	417.92	44.8718	894.54	77.7778	458.48	40.6977	244.561	59.322	478.99	68.6275
181021	NPD5	H3K9me3	FISH	36	67.9245	188.52	63.1579	327.39	38.2979	1339.34	63.1579	398.18	65.4545	482.31	65.4545	302.2	83.7209	523.23	54.5455	432.4	75	173.85	40	356.24	73.4694	950.24	62.069	355.57	69.2308	332.21	78.2609	608.26	51.4286	1782.61	76.5957	292.98	57.1429	334.97	59.0164	379.28	46.1538	855.25	80	447.27	41.8605	226.844	61.0169	476.26	70.5882
181021	NPD5	H3K9me3	FISH	37	69.8113	182.4	64.9123	320.47	39.3617	1121.07	64.9123	386.78	67.2727	423.5	67.2727	288.09	86.0465	509.65	56.0606	401.68	77.0833	179.76	41.1111	334.41	75.5102	806.76	63.7931	357.31	71.1538	313.25	80.4348	545.34	52.8571	1403.24	78.7234	285.93	58.7302	326.78	60.6557	350.78	47.4359	797.83	82.2222	426.49	43.0233	225.672	62.7119	478.28	72.549
181021	NPD5	H3K9me3	FISH	38	71.6981	177.36	66.6667	321.27	40.4255	1004.83	66.6667	370.63	69.0909	423.15	69.0909	263.56	88.3721	484.55	57.5758	399.49	79.1667	178.95	42.2222	307.39	77.551	703.02	65.5172	330.24	73.0769	324.46	82.6087	487.23	54.2857	1210.86	80.8511	312.19	60.3175	317.73	62.2951	323.12	48.7179	703.37	84.4444	483.4	44.186	226.489	64.4068	470.13	74.5098
181021	NPD5	H3K9me3	FISH	39	73.5849	177.9	68.4211	291.91	41.4894	943.82	68.4211	353.37	70.9091	407.21	70.9091	266.77	90.6977	465.7	59.0909	376.22	81.25	178.65	43.3333	299.61	79.5918	635.72	67.2414	332.4	75	299.33	84.7826	465.41	55.7143	1099.06	82.9787	299.46	61.9048	305.15	63.9344	321.39	50	609.94	86.6667	434.47	45.3488	240.625	66.1017	440.71	76.4706
181021	NPD5	H3K9me3	FISH	40	75.4717	171.86	70.1754	293.83	42.5532	860.5	70.1754	299.66	72.7273	405.03	72.7273	268.91	93.0233	442.16	60.6061	375.68	83.3333	180.11	44.4444	276.27	81.6327	600.98	68.9655	326.99	76.9231	305.49	86.9565	437.5	57.1429	993.63	85.1064	284.4	63.4921	306.75	65.5738	312.23	51.2821	564.98	88.8889	411.7	46.5116	233.954	67.7966	416.62	78.4314
181021	NPD5	H3K9me3	FISH	41	77.3585	168.7	71.9298	289.42	43.617	833.25	71.9298	313.23	74.5455	360.13	74.5455	250.44	95.3488	426.47	62.1212	358.23	85.4167	169.51	45.5556	268.54	83.6735	541.15	70.6897	337.39	78.8462	298.43	89.1304	408.78	58.5714	880.27	87.234	270.01	65.0794	289.55	67.2131	304.03	52.5641	534.74	91.1111	385.14	47.6744	223.297	69.4915	391.97	80.3922
181021	NPD5	H3K9me3	FISH	42	79.2453	172.98	73.6842	284.1	44.6809	834.35	73.6842	284.12	76.3636	343.01	76.3636	250.29	97.6744	422.37	63.6364	380.81	87.5	172.74	46.6667	259.55	85.7143	603.91	72.4138	308.56	80.7692	268.89	91.3043	422.87	60	793.44	89.3617	261.3	66.6667	281.66	68.8525	294.2	53.8462	513.22	93.3333	352.23	48.8372	215.257	71.1864	377.16	82.3529
181021	NPD5	H3K9me3	FISH	43	81.1321	170.81	75.4386	304.21	45.7447	754.82	75.4386	261.86	78.1818	359.51	78.1818	245.05	100	418.36	65.1515	385.75	89.5833	169.44	47.7778	249.58	87.7551	570.7	74.1379	351.64	82.6923	276.39	93.4783	350.31	61.4286	765.71	91.4894	253.73	68.254	267.95	70.4918	288.71	55.1282	480.41	95.5556	313.77	50	209.229	72.8814	391.49	84.3137
181021	NPD5	H3K9me3	FISH	44	83.0189	167.81	77.193	309.01	46.8085	726.1	77.193	255.38	80	355.42	80	266.59			66.6667	369.65	91.6667	171.6	48.8889	221.82	89.7959	469.9	75.8621	384.02	84.6154	276.07	95.6522	358.45	62.8571	698.17	93.617	237.53	69.8413	272.56	72.1311	292.47	56.4103	442.5	97.7778	295.95	51.1628	194.404	74.5763	376.18	86.2745
181021	NPD5	H3K9me3	FISH	45	84.9057	156.65	78.9474	294.53	47.8723	671.7	78.9474	259.89	81.8182	354.94	81.8182	245.94			68.1818	376.16	93.75	166.68	50	215.91	91.8367	380.77	77.5862	457.65	86.5385	259.12	97.8261	318.95	64.2857	584.96	95.7447	228.41	71.4286	267.65	73.7705	296.15	57.6923	429.48	100	282.99	52.3256	190.232	76.2712	369.78	88.2353
181021	NPD5	H3K9me3	FISH	46	86.7925	167.03	80.7018	281.66	48.9362	555.27	80.7018	241.04	83.6364	334.67	83.6364	238.34			69.697	387.49	95.8333	156.61	51.1111	211.12	93.8776	330.16	79.3103	518.69	88.4615	256.45	100	303.83	65.7143	579.41	97.8723	226.3	73.0159	276.91	75.4098	294.54	58.9744	389.25			53.4884	201.552	77.9661	349.63	90.1961
181021	NPD5	H3K9me3	FISH	47	88.6792	163.48	82.4561	265.36	50	461.24	82.4561	228.56	85.4545	329.22	85.4545	245			71.2121	430.73	97.9167	159.23	52.2222	200.26	95.9184	319.51	81.0345	573.01	90.3846	241.32			67.1429	548.6	100	238.15	74.6032	260.55	77.0492	279.62	60.2564	374.28			54.6512	207.684	79.661	313.27	92.1569
181021	NPD5	H3K9me3	FISH	48	90.566	159.2	84.2105	257.33	51.0638	447.81	84.2105	224.41	87.2727	366.23	87.2727	233.25			72.7273	453.31	100	159.43	53.3333	200.77	97.9592	304.65	82.7586	513.86	92.3077	237.17			68.5714	506.46			76.1905	254.31	78.6885	260.62	61.5385	323.59			55.814	209.986	81.3559	314.8	94.1176
181021	NPD5	H3K9me3	FISH	49	92.4528	158.66	85.9649	252.24	52.1277	413.46	85.9649	225.7	89.0909	387.43	89.0909	234.02			74.2424	454.11			54.4444	189.88	100	320.01	84.4828	405.76	94.2308	233.93			70	481.48			77.7778	253.1	80.3279	268.22	62.8205	310.6			56.9767	207.909	83.0508	310.14	96.0784
181021	NPD5	H3K9me3	FISH	50	94.3396	163.85	87.7193	237.25	53.1915	401.3	87.7193	221.61	90.9091	404.65	90.9091	217.23			75.7576	428.84			55.5556	179.26			86.2069	423.21	96.1538	226.16			71.4286	457.73			79.3651	247.1	81.9672	262.57	64.1026	301.87			58.1395	213.645	84.7458	305.07	98.0392
181021	NPD5	H3K9me3	FISH	51	96.2264	169.62	89.4737	250.92	54.2553	362.74	89.4737	219.72	92.7273	366.87	92.7273	224.62			77.2727	389.03			56.6667	179.05			87.931	456.13	98.0769	238.72			72.8571	421.1			80.9524	235.64	83.6066	233.17	65.3846	284.17			59.3023	216.553	86.4407	277.27	100
181021	NPD5	H3K9me3	FISH	52	98.1132	160.49	91.2281	227.22	55.3191	310.9	91.2281	218.53	94.5455	320.22	94.5455	247.51			78.7879	374.76			57.7778	189.79			89.6552	446.04	100	227.25			74.2857	398.08			82.5397	259.43	85.2459	236.18	66.6667	273.2			60.4651	233.467	88.1356	272.05
181021	NPD5	H3K9me3	FISH	53	100	160.21	92.9825	236.27	56.383	302.07	92.9825	218.31	96.3636	304.02	96.3636	254.29			80.303	352.99			58.8889	176.96			91.3793	462.49					75.7143	344.1			84.127	230.62	86.8852	218.11	67.9487	256.77			61.6279	243.34	89.8305	274.34
181021	NPD5	H3K9me3	FISH	54			94.7368	214.13	57.4468	277.93	94.7368	218.19	98.1818	304.04	98.1818	255.77			81.8182	337.2			60	162.6			93.1034	467.78					77.1429	322.86			85.7143	231.38	88.5246	239.61	69.2308	240.18			62.7907	247.101	91.5254	278.83
181021	NPD5	H3K9me3	FISH	55			96.4912	209.25	58.5106	287.34	96.4912	220.52	100	305.85	100	283.86			83.3333	338.96			61.1111	170.61			94.8276	483.17					78.5714	304.25			87.3016	240.19	90.1639	229.52	70.5128	226.67			63.9535	259.402	93.2203	265.63
181021	NPD5	H3K9me3	FISH	56			98.2456	205.19	59.5745	278.48	98.2456	207.41							84.8485	346.91			62.2222	168.45			96.5517	413.83					80	268.49			88.8889	229.34	91.8033	229.47	71.7949	222.77			65.1163	233.011	94.9153	259.12
181021	NPD5	H3K9me3	FISH	57			100	205.36	60.6383	238.33	100	200.86							86.3636	336.04			63.3333	161.99			98.2759	379.28					81.4286	273.36			90.4762	223.74	93.4426	211.53	73.0769	230.68			66.2791	218.609	96.6102	246.27
181021	NPD5	H3K9me3	FISH	58					61.7021	259.31									87.8788	348.5			64.4444	164.98			100	373.19					82.8571	239.22			92.0635	219.88	95.082	223.41	74.359	233.68			67.4419	197.69	98.3051	249.49
181021	NPD5	H3K9me3	FISH	59					62.766	221.71									89.3939	374.01			65.5556	160.24									84.2857	239.53			93.6508	214.45	96.7213	226.03	75.641	214.25			68.6047	188.655	100	251.95
181021	NPD5	H3K9me3	FISH	60					63.8298	214.85									90.9091	387.11			66.6667	168.78									85.7143	230.41			95.2381	223.51	98.3607	210.89	76.9231	210.4			69.7674	177.723
181021	NPD5	H3K9me3	FISH	61					64.8936	224.54									92.4242	410.72			67.7778	166.89									87.1429	228.06			96.8254	221.03	100	213.24	78.2051	212.29			70.9302	181.613
181021	NPD5	H3K9me3	FISH	62					65.9574	218.87									93.9394	408.82			68.8889	168.03									88.5714	215.89			98.4127	228.03			79.4872	212.06			72.093	169.568
181021	NPD5	H3K9me3	FISH	63					67.0213	233.13									95.4545	383.86			70	174.24									90	205.26			100	221.81			80.7692	192.35			73.2558	169.375
181021	NPD5	H3K9me3	FISH	64					68.0851	226.76									96.9697	343.93			71.1111	154.96									91.4286	204.32							82.0513	180.84			74.4186	167.497
181021	NPD5	H3K9me3	FISH	65					69.1489	202.72									98.4848	327.62			72.2222	163.27									92.8571	192.44							83.3333	182.61			75.5814	164.268
181021	NPD5	H3K9me3	FISH	66					70.2128	196.19									100	344.99			73.3333	150.9									94.2857	197.05							84.6154	200.21			76.7442	161.917
181021	NPD5	H3K9me3	FISH	67					71.2766	196													74.4444	162.79									95.7143	184.18							85.8974	190.34			77.907	168.042
181021	NPD5	H3K9me3	FISH	68					72.3404	190.2													75.5556	150.25									97.1429	183.93							87.1795	188.99			79.0698	168.779
181021	NPD5	H3K9me3	FISH	69					73.4043	186.96													76.6667	153									98.5714	180.48							88.4615	184.3			80.2326	168.254
181021	NPD5	H3K9me3	FISH	70					74.4681	180.62													77.7778	149.9									100	176.25							89.7436	179			81.3953	169.214
181021	NPD5	H3K9me3	FISH	71					75.5319	186.56													78.8889	144.38																	91.0256	190.26			82.5581	164.583
181021	NPD5	H3K9me3	FISH	72					76.5957	192.81													80	143.84																	92.3077	192.83			83.7209	163.382
181021	NPD5	H3K9me3	FISH	73					77.6596	183.76													81.1111	149.62																	93.5897	183.02			84.8837	174.299
181021	NPD5	H3K9me3	FISH	74					78.7234	184.05													82.2222	154.32																	94.8718	186.64			86.0465	182.517
181021	NPD5	H3K9me3	FISH	75					79.7872	180.13													83.3333	153.28																	96.1538	182.52			87.2093	184.14
181021	NPD5	H3K9me3	FISH	76					80.8511	183.43													84.4444	149.67																	97.4359	190.88			88.3721	186.356
181021	NPD5	H3K9me3	FISH	77					81.9149	180.47													85.5556	151.24																	98.7179	183.79			89.5349	181.853
181021	NPD5	H3K9me3	FISH	78					82.9787	185.33													86.6667	150.24																	100	183.83			90.6977	190.383
181021	NPD5	H3K9me3	FISH	79					84.0426	172.3													87.7778	146.98																					91.8605	177.539
181021	NPD5	H3K9me3	FISH	80					85.1064	170.91													88.8889	148.29																					93.0233	178.136
181021	NPD5	H3K9me3	FISH	81					86.1702	177.89													90	148.36																					94.186	167.176
181021	NPD5	H3K9me3	FISH	82					87.234	185.91													91.1111	142.81																					95.3488	158.403
181021	NPD5	H3K9me3	FISH	83					88.2979	178.19													92.2222	143.41																					96.5116	161.405
181021	NPD5	H3K9me3	FISH	84					89.3617	170.99													93.3333	147.4																					97.6744	160.37
181021	NPD5	H3K9me3	FISH	85					90.4255	179.33													94.4444	153.45																					98.8372	167.058
181021	NPD5	H3K9me3	FISH	86					91.4894	170.78													95.5556	152.69																					100	168.736
181021	NPD5	H3K9me3	FISH	87					92.5532	174.95													96.6667	156.39
181021	NPD5	H3K9me3	FISH	88					93.617	174.49													97.7778	145.41
181021	NPD5	H3K9me3	FISH	89					94.6809	164.2													98.8889	148.58
181021	NPD5	H3K9me3	FISH	90					95.7447	167.2													100	153.6
181021	NPD5	H3K9me3	FISH	91					96.8085	165.74
181021	NPD5	H3K9me3	FISH	92					97.8723	164.26
181021	NPD5	H3K9me3	FISH	93					98.9362	158.5
181021	NPD5	H3K9me3	FISH	94					100	165.74
					0		0		0		0		0		0		0		0		0		0		0		0		0		0		0		0		0		0		0		0		0		0		0
					5	616.805	5	1080.28	5	893.258	5	1315.3	5	1224.48	5	1488.71	5	1409.49	5	2258.96	5	327.485	5	447.917	5	507.17	5	490.295	5	1525.07	5	1267.24	5	1234.76	5	1118.61	5	2910.41	5	1102.89	5	1029.87	5	1016.47	5	284.761	5	929	5
					10	837.497	10	1116.12	10	2153.25	10	2390.78	10	1992.27	10	2272.93	10	2009.56	10	2535.25	10	449.225	10	653.408	10	686.25	10	879.613	10	2407.89	10	1793.99	10	3065.49	10	1635.09	10	4942.9	10	1758.1	10	1907.81	10	1243.24	10	440.284	10	1384.67	10
					15	1295.23	15	1520.5	15	4713.89	15	4294.7	15	3435.07	15	3563.43	15	2584.91	15	2064.55	15	826.077	15	893.44	15	1094.91	15	1647.44	15	3686.7	15	2702.99	15	4507.09	15	2736.4	15	6718.34	15	2638.2	15	4108.48	15	1552.16	15	768.041	15	3089.67	15
					20	1799.8	20	2564.35	20	5456.05	20	6457.67	20	4331.57	20	3678.56	20	2986.75	20	1937.58	20	1192.32	20	1777.87	20	2157.6	20	1900.71	20	4097.49	20	4486.74	20	4791.69	20	3179.05	20	6163.1	20	3702.86	20	6439.73	20	1956.43	20	864.262	20	5112	20
					25	2014.23	25	4014.15	25	4686.25	25	8028.98	25	4891.04	25	3044.59	25	3757.33	25	1580.93	25	1003.9	25	1773.92	25	3142.11	25	1409.91	25	3631.68	25	6090.96	25	4878.38	25	2923.31	25	4604.46	25	4435.41	25	8557.51	25	2833.24	25	956.328	25	5222.33	25
					30	1579.86	30	4132.53	30	3649.25	30	7314.27	30	5454.22	30	2066.07	30	4304.76	30	1556.01	30	675.89	30	784.966	30	3744.43	30	1053.11	30	3249.11	30	6815.91	30	3611.86	30	2239.61	30	2867.16	30	4960.14	30	6645.07	30	4463.42	30	582.894	30	4438	30
					35	1029.62	35	3269.02	35	3401.13	35	5067.66	35	4241.16	35	1574.23	35	4085.75	35	1004.62	35	479.54	35	536.964	35	4102.34	35	906.467	35	1869.32	35	7033.18	35	3222.28	35	1296.74	35	1435.96	35	3523.06	35	3773.86	35	5247.1	35	372.103	35	2911.33	35
					40	532.97	40	2268.92	40	1675.45	40	3329.39	40	2802.47	40	1356	40	3655.39	40	796.683	40	349.693	40	393.882	40	3776.01	40	594.16	40	938.18	40	7142.99	40	3772.25	40	886.58	40	794.35	40	2256.69	40	2154.96	40	5269.2	40	268.191	40	1582.06	40
					45	376.23	45	1180.04	45	895.35	45	1667.57	45	2316.37	45	1029.19	45	3620.47	45	785.403	45	294.005	45	314.784	45	2975.01	45	503.42	45	645.34	45	6188.77	45	4200.45	45	629.197	45	563.743	45	1179.86	45	1096.47	45	4542.71	45	230.892	45	947.01	45
					50	297.327	50	688.47	50	633.826	50	1024.43	50	1673.17	50	692.223	50	3528.26	50	581.835	50	249.723	50	243.08	50	2681.11	50	517.353	50	511.03	50	3838.65	50	3270.17	50	511.65	50	427.403	50	725.423	50	741.597	50	2960.38	50	224.472	50	610.81	50
					55	234.603	55	472.083	55	417.31	55	709.787	55	1062.6	55	483.793	55	2857.17	55	460.88	55	238.467	55	203.588	55	2236.47	55	529.28	55	463.967	55	2486.12	55	1665.37	55	428.685	55	372.233	55	504.753	55	555.72	55	1740.95	55	200.62	55	534.57	55
					60	201.975	60	359.427	60	291.344	60	538.523	60	671.45	60	367.96	60	2119.5	60	392.463	60	218.64	60	177.532	60	2078.44	60	395.97	60	409.363	60	1577.19	60	941.6	60	377.87	60	340.327	60	412.717	60	435.41	60	1062.95	60	212.023	60	496.14	60
					65	184.687	65	332.843	65	231.748	65	414.74	65	584.49	65	325.983	65	1706.42	65	371.573	65	199.103	65	165.726	65	1783.36	65	352.22	65	360.575	65	1121.03	65	710.57	65	360.74	65	309.877	65	331.763	65	327.585	65	840.667	65	245.827	65	474.89	65
					70	184.337	70	306.59	70	220.37	70	362	70	442.987	70	284.617	70	1097.41	70	379.762	70	188.58	70	167.636	70	1250.08	70	329.877	70	342.94	70	882.293	70	528.987	70	345.315	70	277.93	70	303.487	70	263.58	70	655.02	70	203.138	70	416.433	70
					75	177.63	75	289.117	75	189.994	75	299.003	75	390.79	75	262.04	75	727.59	75	446.05	75	178.857	75	161.232	75	998.64	75	332.53	75	312.347	75	697.505	75	439.597	75	341.29	75	268.37	75	292.443	75	228.45	75	544.57	75	172.013	75	381.61	75
					80	171.18	80	302.583	80	185.462	80	259.043	80	352.647	80	253.977	80	609.515	80	397.543	80	177.52	80	148.274	80	715.167	80	453.453	80	301.083	80	643.655	80	309.925	80	289.455	80	251.503	80	278.26	80	212.25	80	458.727	80	165.751	80	344.227	80
					85	165.09	85	268.117	85	180.382	85	231.337	85	348.343	85	250.29	85	551.24	85	344.015	85	179.38	85	150.146	85	571.065	85	497.543	85	273.783	85	499.327	85	255.15	85	305.825	85	241.897	85	254.653	85	189.002	85	452.387	85	167.946	85	310.003	85
					90	165.255	90	246.803	90	176.778	90	222.343	90	360.96	90	237.423	90	497.1	90	352.85	90	170.563	90	149.022	90	548.17	90	441.793	90	257.785	90	423.14	90	219.905	90	271.903	90	233.637	90	231.3	90	185.658	90	423.085	90	183.716	90	274.553	90
					95	160.57	95	225.873	95	172.75	95	218.343	95	363.913	95	229.787	95	453.93	95	402.217	95	169.14	95	147.086	95	355.465	95	471.147	95	237.473	95	386.59	95	199.767	95	245.63	95	219.357	95	223.507	95	188.188	95	368.685	95	178.308	95	267.86	95
					100	163.44	100	206.6	100	164.288	100	209.597	100	304.637	100	264.64	100	422.4	100	350.1	100	158.423	100	151.334	100	314.723	100	388.767	100	230.71	100	327.077	100	181.21	100	230.953	100	223.595	100	218.392	100	185.255	100	297.57	100	163.194	100	249.237	100
[truncated: 17 more columns]

## Sheet: IF_Binned
date	cell_line	protein	test_type	index	i001_X_pcnt	i001_Y	i003_X_pcnt	i003_Y	i004_X_pcnt	i004_Y	i005_X_pcnt	i005_Y	i006_X_pcnt	i006_Y	i007_X_pcnt	i007_Y	i008_X_pcnt	i008_Y	i011_X_pcnt	i011_Y	i012_X_pcnt	i012_Y	i013_X_pcnt	i013_Y	i014_X_pcnt	i014_Y	i017_X_pcnt	i017_Y	i018_X_pcnt	i018_Y	i020_X_pcnt	i020_Y	i021_X_pcnt	i021_Y	i023_X_pcnt	i023_Y	i024_X_pcnt	i024_Y	i025_X_pcnt	i025_Y	i026_X_pcnt	i026_Y	i027_X_pcnt	i027_Y	i028_X_pcnt	i028_Y	i030_X_pcnt	i030_Y	i032A_X_pcnt
181021	NPD5	H3K9me3	IF	0	0	20512	0	22752	0	23936	0	25552	0	17280	0	18112	0	14480	0	17664	0	14512	0	14880	0	16624	0	22784	0	8480	0	5104	0	8832	0	11360	0	8832	0	10160	0	12704	0	12992	0	16800	0	12112	0
181021	NPD5	H3K9me3	IF	1	2.22222	20960	2.32558	23939.9	2.17391	21431.2	2.08333	25706.4	2.43902	15909	2.94118	17079.2	3.33333	14289.6	2.32558	18448.9	2.38095	14203	1.23457	15421.7	2.43902	15758	2.85714	21485.8	1.78571	8526.67	2.12766	4674.11	1.6129	9590.72	2.12766	11492.1	1.81818	8780.98	1.53846	10061.1	1.5873	13191.7	2.85714	12995.6	1.66667	16923.3	1.5625	11419.8	1.85185
181021	NPD5	H3K9me3	IF	2	4.44444	21088	4.65116	24095.7	4.34783	18601.3	4.16667	24934.3	4.87805	14905.7	5.88235	16233.5	6.66667	13943.2	4.65116	17922.7	4.7619	13806.3	2.46914	15446.8	4.87805	14747.7	5.71429	19840.8	3.57143	7734.73	4.25532	4590.19	3.22581	8965.5	4.25532	10916.6	3.63636	7911.25	3.07692	10317.7	3.1746	13048.7	5.71429	12592.1	3.33333	14955	3.125	11390.9	3.7037
181021	NPD5	H3K9me3	IF	3	6.66667	22144	6.97674	21881.9	6.52174	16889.6	6.25	21379.8	7.31707	13021.2	8.82353	14444.8	10	13692.6	6.97674	15526.8	7.14286	13277.6	3.7037	14282.6	7.31707	14386.3	8.57143	18688.6	5.35714	7447.91	6.38298	4181.15	4.83871	8280.59	6.38298	10586.3	5.45455	7295.61	4.61538	10408.1	4.7619	12977.3	8.57143	12244.8	5	13470.7	4.6875	10728.3	5.55556
181021	NPD5	H3K9me3	IF	4	8.88889	20192	9.30233	18911.2	8.69565	15333.1	8.33333	18922.9	9.7561	10931	11.7647	12441.7	13.3333	13148.9	9.30233	13379.1	9.52381	11319.5	4.93827	13122.5	9.7561	13837.7	11.4286	16282.9	7.14286	6805.97	8.51064	4319.08	6.45161	8108.7	8.51064	10023.4	7.27273	7308.04	6.15385	10354	6.34921	12487	11.4286	10998.5	6.66667	12026.3	6.25	10667.1	7.40741
181021	NPD5	H3K9me3	IF	5	11.1111	17376	11.6279	15856.2	10.8696	14781	10.4167	16412.5	12.1951	10587.8	14.7059	10503.1	16.6667	12624	11.6279	12034.5	11.9048	11210.4	6.17284	12757.1	12.1951	12050.5	14.2857	14452	8.92857	6435.8	10.6383	3946.21	8.06452	7532.68	10.6383	9236.83	9.09091	7130.51	7.69231	8748.55	7.93651	11962.6	14.2857	9596.01	8.33333	12260.7	7.8125	10772.6	9.25926
181021	NPD5	H3K9me3	IF	6	13.3333	16144	13.9535	14086.4	13.0435	14063.3	12.5	14854.1	14.6341	9734.98	17.6471	9117.86	20	12128.5	13.9535	11415.5	14.2857	11375.4	7.40741	11802.2	14.6341	10570	17.1429	12537.1	10.7143	6084.42	12.766	3880.3	9.67742	7080.21	12.766	8485.33	10.9091	7123.32	9.23077	7504.32	9.52381	10739.6	17.1429	8741.85	10	11827.3	9.375	9066.98	11.1111
181021	NPD5	H3K9me3	IF	7	15.5556	15488	16.2791	12728.1	15.2174	13187.2	14.5833	14953.4	17.0732	9758.59	20.5882	8594.23	23.3333	12576.1	16.2791	11846	16.6667	11234	8.64198	10705.7	17.0732	9729.79	20	12326.8	12.5	5823.19	14.8936	3738.34	11.2903	7195.55	14.8936	7750.33	12.7273	6775.42	10.7692	6575.4	11.1111	9777.5	20	8174.83	11.6667	12141.5	10.9375	7507.55	12.963
181021	NPD5	H3K9me3	IF	8	17.7778	15766.7	18.6047	12448.6	17.3913	13071.9	16.6667	14616.8	19.5122	10380.3	23.5294	8603.14	26.6667	12278.8	18.6047	12607.7	19.0476	11829.9	9.87654	9614.76	19.5122	8588.77	22.8571	12299.2	14.2857	5216.8	17.0213	3526.99	12.9032	7391.97	17.0213	7209.67	14.5455	6334.62	12.3077	6457.19	12.6984	9523.88	22.8571	8393.29	13.3333	13350.1	12.5	6848.92	14.8148
181021	NPD5	H3K9me3	IF	9	20	15920.9	20.9302	13084.4	19.5652	13000.5	18.75	14247.1	21.9512	9685.59	26.4706	9312.89	30	11651.7	20.9302	12875	21.4286	11977.7	11.1111	8850.9	21.9512	9098.47	25.7143	12049.9	16.0714	5191.91	19.1489	3531.62	14.5161	7183.37	19.1489	7141.89	16.3636	5939.01	13.8462	5739.14	14.2857	9568.98	25.7143	8414.74	15	12683.3	14.0625	6747.88	16.6667
181021	NPD5	H3K9me3	IF	10	22.2222	16298.1	23.2558	12808.4	21.7391	13284.5	20.8333	15316.3	24.3902	9963.19	29.4118	9831.92	33.3333	11735.9	23.2558	12946.8	23.8095	11543.2	12.3457	8337.3	24.3902	8973.87	28.5714	12320.3	17.8571	5343.9	21.2766	3611.99	16.129	6994.77	21.2766	6986.79	18.1818	5493.37	15.3846	5650.35	15.873	9138.66	28.5714	8123.77	16.6667	11677.4	15.625	5530.32	18.5185
181021	NPD5	H3K9me3	IF	11	24.4444	16374.7	25.5814	12873.7	23.913	12996.1	22.9167	14825	26.8293	10216.5	32.3529	10490.6	36.6667	11126.2	25.5814	13455.7	26.1905	11269.9	13.5802	8362.08	26.8293	8858.5	31.4286	12801.2	19.6429	5094.45	23.4043	3385.48	17.7419	6640.08	23.4043	7330.5	20	5173.59	16.9231	5317.57	17.4603	8526.12	31.4286	8116.95	18.3333	11496	17.1875	5423.31	20.3704
181021	NPD5	H3K9me3	IF	12	26.6667	16386.6	27.907	12283.9	26.087	13528.8	25	15498.3	29.2683	10355.9	35.2941	10224.8	40	11219.7	27.907	11557.1	28.5714	11096.7	14.8148	8298.08	29.2683	9324.87	34.2857	13096.3	21.4286	4899.94	25.5319	3365.29	19.3548	6675.77	25.5319	7251.46	21.8182	5031.68	18.4615	5086.81	19.0476	8193.54	34.2857	8092.61	20	11013.9	18.75	5247.45	22.2222
181021	NPD5	H3K9me3	IF	13	28.8889	17373.9	30.2326	12208.5	28.2609	13602.8	27.0833	15228.8	31.7073	10142.5	38.2353	8777.14	43.3333	10634.4	30.2326	11431.2	30.9524	11204.6	16.0494	7801.2	31.7073	9188.25	37.1429	13804.6	23.2143	4629.44	27.6596	3621.06	20.9677	7001.54	27.6596	7169.35	23.6364	5780.3	20	5237.22	20.6349	8153.59	37.1429	7685.24	21.6667	11236.2	20.3125	5229.96	24.0741
181021	NPD5	H3K9me3	IF	14	31.1111	18784.9	32.5581	12276.6	30.4348	13672.3	29.1667	14228.6	34.1463	10236.6	41.1765	7860.45	46.6667	10474	32.5581	10939	33.3333	11405	17.284	7186.3	34.1463	8832.64	40	14090.6	25	4583.83	29.7872	3663.13	22.5806	7666.11	29.7872	7240.92	25.4545	6513.83	21.5385	4948.08	22.2222	8300.79	40	7875.18	23.3333	11197.4	21.875	5270.12	25.9259
181021	NPD5	H3K9me3	IF	15	33.3333	19661.5	34.8837	11711.2	32.6087	13551.1	31.25	13084.9	36.5854	10573.3	44.1176	8029.3	50	9710.75	34.8837	11480.6	35.7143	11177.7	18.5185	6994.21	36.5854	8807.64	42.8571	13555.6	26.7857	4320.57	31.9149	3526.93	24.1935	8540.33	31.9149	7288.62	27.2727	6648.26	23.0769	5014.37	23.8095	8361	42.8571	8167.77	25	11178.7	23.4375	5181.43	27.7778
181021	NPD5	H3K9me3	IF	16	35.5556	20059.2	37.2093	11627.7	34.7826	14412.5	33.3333	12635.9	39.0244	10373.5	47.0588	8220.37	53.3333	10346.2	37.2093	11808.2	38.0952	10914.5	19.7531	7094.9	39.0244	9091.43	45.7143	12170.4	28.5714	4036.62	34.0426	3624.74	25.8065	8607.14	34.0426	6520.39	29.0909	5991.81	24.6154	5111.52	25.3968	8346.66	45.7143	8295.95	26.6667	11240.2	25	4916.15	29.6296
181021	NPD5	H3K9me3	IF	17	37.7778	20504.4	39.5349	11050.9	36.9565	14318	35.4167	12842.4	41.4634	10863.6	50	8804.39	56.6667	10443	39.5349	11763.6	40.4762	11231.4	20.9877	6982.63	41.4634	9573.83	48.5714	11200.7	30.3571	4300.76	36.1702	3779.19	27.4194	7998.9	36.1702	6484.85	30.9091	5243.28	26.1538	5306	26.9841	7426.5	48.5714	8094.47	28.3333	11158.8	26.5625	4766.92	31.4815
181021	NPD5	H3K9me3	IF	18	40	19579	41.8605	11023.7	39.1304	13870.9	37.5	12432.3	43.9024	10633.4	52.9412	8983.19	60	10612.3	41.8605	11464.7	42.8571	12329.8	22.2222	6860.96	43.9024	9786.92	51.4286	10437	32.1429	4075.1	38.2979	3520.05	29.0323	7550.54	38.2979	6677.86	32.7273	4895.7	27.6923	5711.65	28.5714	6753.7	51.4286	8372.03	30	10865.6	28.125	5004.49	33.3333
181021	NPD5	H3K9me3	IF	19	42.2222	19270.3	44.186	10730.6	41.3043	13573.2	39.5833	12232.8	46.3415	10537.7	55.8824	8717.95	63.3333	10601.9	44.186	11599.5	45.2381	13513.2	23.4568	6682.75	46.3415	9765.2	54.2857	10682.9	33.9286	4015.63	40.4255	3363.06	30.6452	6886.73	40.4255	6785.79	34.5455	4763.36	29.2308	6092.62	30.1587	6488.13	54.2857	8221.79	31.6667	11003.4	29.6875	4950.56	35.1852
181021	NPD5	H3K9me3	IF	20	44.4444	19342.1	46.5116	11210	43.4783	13256.5	41.6667	11593.2	48.7805	10079.2	58.8235	8693.47	66.6667	10547	46.5116	10786.5	47.619	14234.8	24.6914	6661.53	48.7805	9214.93	57.1429	11530.9	35.7143	4136.86	42.5532	3555.9	32.2581	6616.7	42.5532	6653.25	36.3636	4602.47	30.7692	6125.27	31.746	6719.26	57.1429	7884.06	33.3333	11807.1	31.25	5026.78	37.037
181021	NPD5	H3K9me3	IF	21	46.6667	19286.5	48.8372	8885.01	45.6522	12683.8	43.75	10995.9	51.2195	9534.08	61.7647	7666.99	70	10232.3	48.8372	10990.8	50	14559.1	25.9259	6227.53	51.2195	8483.71	60	10839.4	37.5	4053	44.6809	3556.17	33.871	6338.19	44.6809	6533.42	38.1818	4497.11	32.3077	6111.7	33.3333	6515.22	60	8413.47	35	12323.8	32.8125	5015.52	38.8889
181021	NPD5	H3K9me3	IF	22	48.8889	18885.5	51.1628	8311.93	47.8261	12767.1	45.8333	10816	53.6585	9533.8	64.7059	7218	73.3333	9417.97	51.1628	10672.4	52.381	14262.5	27.1605	5935.23	53.6585	7914.29	62.8571	10576.8	39.2857	3905.95	46.8085	3343.57	35.4839	6354.79	46.8085	6895.35	40	4469.87	33.8462	6159.57	34.9206	6737.64	62.8571	7868.2	36.6667	12668.2	34.375	5604.06	40.7407
181021	NPD5	H3K9me3	IF	23	51.1111	18586.3	53.4884	7794.02	50	13429	47.9167	10913.7	56.0976	8885.61	67.6471	6426.29	76.6667	8856.45	53.4884	10535.7	54.7619	13437.2	28.3951	5887.04	56.0976	7786.19	65.7143	11089.3	41.0714	3923.96	48.9362	3367.76	37.0968	6982.35	48.9362	7265.52	41.8182	4744.46	35.3846	5777.15	36.5079	6535.62	65.7143	7542.66	38.3333	12974.6	35.9375	5695.33	42.5926
181021	NPD5	H3K9me3	IF	24	53.3333	18151	55.814	7878.42	52.1739	15138.9	50	11183.3	58.5366	9438.27	70.5882	5992.62	80	8573.73	55.814	10426.9	57.1429	12780.3	29.6296	5896.49	58.5366	7996.4	68.5714	10097	42.8571	3951.66	51.0638	3433.19	38.7097	7393.58	51.0638	7269.09	43.6364	4590.26	36.9231	5517.72	38.0952	6879.6	68.5714	7108.17	40	13899.7	37.5	5510.23	44.4444
181021	NPD5	H3K9me3	IF	25	55.5556	17655.9	58.1395	8084.57	54.3478	15668.7	52.0833	11911.4	60.9756	8923.59	73.5294	5929.09	83.3333	8511.68	58.1395	10800.6	59.5238	12135.2	30.8642	5868.4	60.9756	7966.14	71.4286	10118.9	44.6429	3901.95	53.1915	3662.29	40.3226	7347.7	53.1915	7192.56	45.4545	4561.99	38.4615	5059.15	39.6825	6222.85	71.4286	7302.62	41.6667	15178	39.0625	5409.48	46.2963
181021	NPD5	H3K9me3	IF	26	57.7778	17980.1	60.4651	8624.91	56.5217	15416.5	54.1667	12198.2	63.4146	9384.94	76.4706	6102.59	86.6667	8552.26	60.4651	10026.8	61.9048	11873.4	32.0988	5983.13	63.4146	7767.18	74.2857	9829.76	46.4286	3994.76	55.3191	3487.48	41.9355	7213.59	55.3191	7427.92	47.2727	4802.56	40	4751.75	41.2698	6026.81	74.2857	7053.98	43.3333	15895.6	40.625	5385.04	48.1481
181021	NPD5	H3K9me3	IF	27	60	18325.6	62.7907	8918.86	58.6957	14389.1	56.25	12350.8	65.8537	9142.28	79.4118	5886.99	90	8171.23	62.7907	9673.03	64.2857	11080.6	33.3333	5714.34	65.8537	8204.58	77.1429	10053.4	48.2143	3795.93	57.4468	3472.09	43.5484	6926.95	57.4468	7313.42	49.0909	5232.87	41.5385	4694.36	42.8571	5651.93	77.1429	6983.22	45	16124	42.1875	5147.74	50
181021	NPD5	H3K9me3	IF	28	62.2222	19567.2	65.1163	9151.17	60.8696	13559	58.3333	12111.4	68.2927	10259.6	82.3529	5926.18	93.3333	8736.58	65.1163	9323.33	66.6667	11342.1	34.5679	5836.89	68.2927	8553.54	80	11253.9	50	3774.8	59.5745	3751.67	45.1613	6836.66	59.5745	7294.02	50.9091	5377.44	43.0769	4587.89	44.4444	5426.89	80	7029.71	46.6667	16107.3	43.75	4594.22	51.8519
181021	NPD5	H3K9me3	IF	29	64.4444	18919.5	67.4419	9338.44	63.0435	13445.2	60.4167	11384.6	70.7317	10836.3	85.2941	6616.16	96.6667	9087.22	67.4419	8933.89	69.0476	11379.5	35.8025	6151.79	70.7317	8415.2	82.8571	10952	51.7857	3742.19	61.7021	4022.71	46.7742	6853.83	61.7021	6672.67	52.7273	5378.52	44.6154	4630.4	46.0317	5441.17	82.8571	7035.46	48.3333	16349.4	45.3125	4522.62	53.7037
181021	NPD5	H3K9me3	IF	30	66.6667	18168	69.7674	8433.47	65.2174	13137.2	62.5	10756.8	73.1707	11114.6	88.2353	8046.93	100	8610.44	69.7674	9270.52	71.4286	11435.2	37.037	5985.81	73.1707	8081.83	85.7143	11685.3	53.5714	3344.33	63.8298	4080.86	48.3871	7149.42	63.8298	6328.23	54.5455	5043.94	46.1538	4707.32	47.619	5431.33	85.7143	7326.39	50	16226.3	46.875	4221.37	55.5556
181021	NPD5	H3K9me3	IF	31	68.8889	18057.6	72.093	7984.48	67.3913	12745.7	64.5833	10702.8	75.6098	10087.9	91.1765	8764.84			72.093	9066.77	73.8095	12600.3	38.2716	5809.01	75.6098	7672.93	88.5714	10293	55.3571	3567.52	65.9574	3974.83	50	7675.63	65.9574	5895.84	56.3636	4731.37	47.6923	4859.87	49.2063	5208.1	88.5714	7043.67	51.6667	15176.6	48.4375	4262.21	57.4074
181021	NPD5	H3K9me3	IF	32	71.1111	17412.5	74.4186	8378.83	69.5652	12870.4	66.6667	10740.4	78.0488	8826.54	94.1176	9443.96			74.4186	9835.42	76.1905	13343	39.5062	6009.06	78.0488	7677.44	91.4286	9937.44	57.1429	3611.53	68.0851	3863.72	51.6129	8121.66	68.0851	5827.58	58.1818	4558.63	49.2308	4698.48	50.7937	5323.43	91.4286	6935.98	53.3333	15299.5	50	4181.02	59.2593
181021	NPD5	H3K9me3	IF	33	73.3333	17805	76.7442	9103.99	71.7391	12991.7	68.75	10712.7	80.4878	8293.41	97.0588	8718.18			76.7442	9471.79	78.5714	12205.8	40.7407	6505.95	80.4878	7389.48	94.2857	9993.12	58.9286	3857.23	70.2128	3503.36	53.2258	8791.3	70.2128	5779.15	60	4402.34	50.7692	4614.97	52.381	5269.35	94.2857	7145.39	55	14950	51.5625	4058.42	61.1111
181021	NPD5	H3K9me3	IF	34	75.5556	18713	79.0698	9089.26	73.913	12686	70.8333	10533.8	82.9268	8091.09	100	8063.17			79.0698	9643.9	80.9524	11227.4	41.9753	6457.26	82.9268	7462.53	97.1429	10293.3	60.7143	3884.28	72.3404	3047.76	54.8387	8464.28	72.3404	5707.15	61.8182	4441.23	52.3077	4664.57	53.9683	5048.12	97.1429	7523.04	56.6667	14409	53.125	3915.02	62.963
181021	NPD5	H3K9me3	IF	35	77.7778	18584.3	81.3953	8399.97	76.087	12611.1	72.9167	10511.5	85.3659	8691.38					81.3953	9760.16	83.3333	11118.2	43.2099	6118.31	85.3659	7648.19	100	10455.4	62.5	3736.9	74.4681	3273.44	56.4516	8264.7	74.4681	6097.3	63.6364	4494.89	53.8462	4585.29	55.5556	5093.53	100	7064.3	58.3333	13468.9	54.6875	3786.21	64.8148
181021	NPD5	H3K9me3	IF	36	80	17337.4	83.7209	7745.14	78.2609	12492.1	75	10589.2	87.8049	8789.15					83.7209	9995.45	85.7143	10333.2	44.4444	5793.41	87.8049	7516.27			64.2857	3682.02	76.5957	3425.34	58.0645	7468.02	76.5957	6397.19	65.4545	4385.79	55.3846	4278.31	57.1429	5013.4			60	13083.1	56.25	3604.32	66.6667
181021	NPD5	H3K9me3	IF	37	82.2222	16562	86.0465	6994.25	80.4348	12138.1	77.0833	10360.6	90.2439	8244.89					86.0465	10035.3	88.0952	9485.88	45.679	5493.02	90.2439	7758.05			66.0714	3546.57	78.7234	3498.36	59.6774	7302.27	78.7234	6139.59	67.2727	4144.86	56.9231	3847.82	58.7302	4913.88			61.6667	11890.2	57.8125	3639.67	68.5185
181021	NPD5	H3K9me3	IF	38	84.4444	16858.6	88.3721	7006.01	82.6087	11991	79.1667	10361.5	92.6829	7693.08					88.3721	9632.05	90.4762	8940.05	46.9136	5537.14	92.6829	7459.8			67.8571	3671.23	80.8511	3502.47	61.2903	6603.45	80.8511	6545.22	69.0909	4235.3	58.4615	3928.64	60.3175	4922.58			63.3333	11666.3	59.375	3554.94	70.3704
181021	NPD5	H3K9me3	IF	39	86.6667	17362.5	90.6977	7064.08	84.7826	11447.2	81.25	10519.4	95.122	7605.49					90.6977	9616.21	92.8571	8927.52	48.1481	5290.24	95.122	7927.87			69.6429	3887.45	82.9787	3463.93	62.9032	6257.96	82.9787	5878.16	70.9091	4355.85	60	3846.43	61.9048	4961.08			65	11813	60.9375	3529.67	72.2222
181021	NPD5	H3K9me3	IF	40	88.8889	18595.8	93.0233	6923.41	86.9565	11982	83.3333	10446.7	97.561	6876.82					93.0233	10902	95.2381	8570.82	49.3827	4991.06	97.561	7894.2			71.4286	3748.58	85.1064	3386.46	64.5161	6145.49	85.1064	5069.46	72.7273	4738.42	61.5385	3659.6	63.4921	5125.84			66.6667	11860.2	62.5	3600.02	74.0741
181021	NPD5	H3K9me3	IF	41	91.1111	18137.2	95.3488	6580.62	89.1304	11782	85.4167	10229.4	100	6362.1					95.3488	11720.5	97.619	8737.75	50.6173	5123.45	100	7705.09			73.2143	4025.33	87.234	3110.7	66.129	6097.16	87.234	4759.85	74.5455	4793.65	63.0769	3452.43	65.0794	5087.19			68.3333	12480.2	64.0625	3703.64	75.9259
181021	NPD5	H3K9me3	IF	42	93.3333	17013.1	97.6744	6308.4	91.3043	11518.7	87.5	10304.5							97.6744	12163.9	100	8173.21	51.8519	4935.47					75	3734.5	89.3617	3238.77	67.7419	6082.64	89.3617	4476.78	76.3636	4960.25	64.6154	3780.97	66.6667	5564.29			70	12695.6	65.625	3738.04	77.7778
181021	NPD5	H3K9me3	IF	43	95.5556	16545.3	100	6286.8	93.4783	11767.1	89.5833	10426.2							100	11953.1			53.0864	5222.08					76.7857	3578.13	91.4894	3174.37	69.3548	5944.37	91.4894	4252.61	78.1818	5396.83	66.1538	3814.77	68.254	5640.8			71.6667	13130.9	67.1875	3559.88	79.6296
181021	NPD5	H3K9me3	IF	44	97.7778	15523.2			95.6522	11986.6	91.6667	10593.5											54.321	5167.2					78.5714	3553.93	93.617	3234.79	70.9677	5859.52	93.617	4450.91	80	5339.8	67.6923	3936.07	69.8413	5549.95			73.3333	14126.8	68.75	3816.23	81.4815
181021	NPD5	H3K9me3	IF	45	100	15529.9			97.8261	12589.1	93.75	10655.4											55.5556	4754.4					80.3571	3642.59	95.7447	3117.84	72.5806	6395.98	95.7447	4558.76	81.8182	4788.36	69.2308	3877.89	71.4286	5285.56			75	14079.5	70.3125	3547.59	83.3333
181021	NPD5	H3K9me3	IF	46					100	12633.6	95.8333	11132.6											56.7901	4834.4					82.1429	3608.25	97.8723	3218.94	74.1935	6524.86	97.8723	5293.65	83.6364	4385.34	70.7692	3956.41	73.0159	5082.18			76.6667	13490.9	71.875	3675.54	85.1852
181021	NPD5	H3K9me3	IF	47							97.9167	11123.3											58.0247	4932.8					83.9286	3347.58	100	3234.28	75.8065	6042.28	100	5118.86	85.4545	4208.62	72.3077	3828.67	74.6032	4911.57			78.3333	12702.9	73.4375	3776.41	87.037
181021	NPD5	H3K9me3	IF	48							100	11467.9											59.2593	5096.48					85.7143	3186.2			77.4194	5686.12			87.2727	4237.41	73.8462	3683.18	76.1905	5128.31			80	11988.8	75	3798.77	88.8889
181021	NPD5	H3K9me3	IF	49																			60.4938	5187.84					87.5	3457.67			79.0323	5539.61			89.0909	4175.43	75.3846	3889.8	77.7778	4945.79			81.6667	11441.7	76.5625	3884.43	90.7407
181021	NPD5	H3K9me3	IF	50																			61.7284	4944.32					89.2857	3475.14			80.6452	5681.47			90.9091	4308.61	76.9231	3734.69	79.3651	5136.58			83.3333	10816.8	78.125	4085.3	92.5926
181021	NPD5	H3K9me3	IF	51																			62.963	4554.08					91.0714	3295.14			82.2581	5502.17			92.7273	4297.4	78.4615	3565.89	80.9524	4858.25			85	10262.2	79.6875	3884.69	94.4444
181021	NPD5	H3K9me3	IF	52																			64.1975	4360.48					92.8571	3188.84			83.871	5437.1			94.5455	4307	80	3361.6	82.5397	4841.8			86.6667	8954.13	81.25	3837.23	96.2963
181021	NPD5	H3K9me3	IF	53																			65.4321	4470.24					94.6429	3277.54			85.4839	5348.25			96.3636	4347.4	81.5385	3419.9	84.127	4979.77			88.3333	8175.76	82.8125	3990.96	98.1481
181021	NPD5	H3K9me3	IF	54																			66.6667	4398.72					96.4286	3196.88			87.0968	5153.57			98.1818	4403.97	83.0769	3443.73	85.7143	4805.28			90	7596.23	84.375	4019.86	100
181021	NPD5	H3K9me3	IF	55																			67.9012	4382.39					98.2143	3118.68			88.7097	5167.06			100	4397.65	84.6154	3562.22	87.3016	4624.38			91.6667	7280.97	85.9375	3872.29
181021	NPD5	H3K9me3	IF	56																			69.1358	4366.93					100	3123.63			90.3226	5149.06					86.1538	3597.62	88.8889	4652.53			93.3333	7098.24	87.5	3888.31
181021	NPD5	H3K9me3	IF	57																			70.3704	4297.11									91.9355	5066.83					87.6923	3717.53	90.4762	4402.16			95	6220.59	89.0625	3803.32
181021	NPD5	H3K9me3	IF	58																			71.6049	4822.71									93.5484	5483.04					89.2308	4183.57	92.0635	3892.81			96.6667	6325.33	90.625	3809.52
181021	NPD5	H3K9me3	IF	59																			72.8395	4532.93									95.1613	5816.73					90.7692	3975.1	93.6508	3893.36			98.3333	6039.99	92.1875	3671.55
181021	NPD5	H3K9me3	IF	60																			74.0741	4646.19									96.7742	5746.26					92.3077	3695.5	95.2381	4191.68			100	5604.26	93.75	3469.27
181021	NPD5	H3K9me3	IF	61																			75.3086	4752.06									98.3871	5362.67					93.8462	3620.21	96.8254	4020					95.3125	3688.18
181021	NPD5	H3K9me3	IF	62																			76.5432	4754.15									100	5474.62					95.3846	3394.67	98.4127	3760.77					96.875	3887.53
181021	NPD5	H3K9me3	IF	63																			77.7778	4545.76															96.9231	3258.19	100	3870.67					98.4375	4220.54
181021	NPD5	H3K9me3	IF	64																			79.0123	4258.95															98.4615	3181.26							100	4221.67
181021	NPD5	H3K9me3	IF	65																			80.2469	4288.42															100	3224.2
181021	NPD5	H3K9me3	IF	66																			81.4815	4447.44
181021	NPD5	H3K9me3	IF	67																			82.716	4329.49
181021	NPD5	H3K9me3	IF	68																			83.9506	4164.03
181021	NPD5	H3K9me3	IF	69																			85.1852	4171.3
181021	NPD5	H3K9me3	IF	70																			86.4198	4151.74
181021	NPD5	H3K9me3	IF	71																			87.6543	4145.94
181021	NPD5	H3K9me3	IF	72																			88.8889	4223.79
181021	NPD5	H3K9me3	IF	73																			90.1235	4080.85
181021	NPD5	H3K9me3	IF	74																			91.358	4190.5
181021	NPD5	H3K9me3	IF	75																			92.5926	4357.1
181021	NPD5	H3K9me3	IF	76																			93.8272	4494.72
181021	NPD5	H3K9me3	IF	77																			95.0617	4190.95
181021	NPD5	H3K9me3	IF	78																			96.2963	4014.66
181021	NPD5	H3K9me3	IF	79																			97.5309	3874.16
181021	NPD5	H3K9me3	IF	80																			98.7654	3848.95
181021	NPD5	H3K9me3	IF	81																			100	3836.47
					0		0		0		0		0		0		0		0		0		0		0		0		0		0		0		0		0		0		0		0		0		0		0
					5	21024	5	24017.8	5	20016.2	5	25320.4	5	15407.3	5	17079.2	5	14289.6	5	18185.8	5	14004.6	5	14568.4	5	15252.8	5	21485.8	5	8130.7	5	4632.15	5	8945.6	5	11204.4	5	8346.11	5	10262.3	5	13072.6	5	12995.6	5	15116.3	5	11179.7	5
					10	21168	10	20396.5	10	16111.4	10	20151.4	10	11976.1	10	15339.1	10	13817.9	10	14452.9	10	12298.6	10	11219.9	10	14112	10	19264.7	10	6896.56	10	4250.11	10	7573.86	10	10304.8	10	7244.72	10	8868.96	10	11729.7	10	12418.5	10	12396.3	10	10168.9	10
					15	16760	15	14971.3	15	14422.1	15	15406.7	15	10161.4	15	11472.4	15	13420.8	15	11725	15	11292.9	15	8462.09	15	11310.2	15	15367.4	15	5708.14	15	3854.95	15	7256.96	15	8490.83	15	6744.45	15	6257.24	15	9623.45	15	10297.2	15	12500.6	15	7034.78	15
					20	15725.2	20	12588.4	20	13086.5	20	14431.9	20	10069.5	20	9117.86	20	12376.3	20	12226.9	20	11531.9	20	7269.15	20	9159.28	20	12432	20	5210.09	20	3529.3	20	6770.21	20	7175.78	20	5535.32	20	5322.99	20	8619.44	20	8458.34	20	11717.6	20	5400.36	20
					25	16197.9	25	12946.4	25	13140.3	25	15213.2	25	9824.39	25	8598.68	25	12352.3	25	12910.9	25	11760.4	25	6796.97	25	9036.17	25	12313	25	4704.4	25	3498.73	25	7735.99	25	7158.65	25	5328.52	25	5077.8	25	8271.79	25	8284.06	25	11156.6	25	5149.41	25
					30	16880.3	30	12578.8	30	13565.8	30	14985.2	30	10286.2	30	9572.4	30	11965.2	30	12506.4	30	11183.3	30	5986.57	30	9091.69	30	12185.1	30	4313.67	30	3549.83	30	8052.19	30	7220.58	30	6384.63	30	5703.42	30	7508.95	30	8269.26	30	11110.8	30	4909.53	30
					35	19223.2	35	12065.4	35	13878.6	35	12860.4	35	10189.5	35	10490.6	35	11693.8	35	11283.6	35	11304.8	35	5850.69	35	9010.44	35	12948.8	35	4130.5	35	3575.84	35	6613.87	35	6904.51	35	4967.45	35	6132.18	35	6615.06	35	8104.78	35	11500	35	5215.45	35
					40	20047.5	40	11339.3	40	14094.5	40	12502.5	40	10473.4	40	9500.97	40	11173	40	11785.9	40	11046.1	40	5988.92	40	8949.53	40	13947.6	40	4031.94	40	3649.62	40	6910.24	40	6581.35	40	4523.15	40	5276.44	40	6546.02	40	7780.21	40	12966.6	40	5538.35	40
					45	19397.1	45	10877.1	45	13414.9	45	11294.6	45	10748.5	45	7944.88	45	10927.1	45	11532.1	45	11780.6	45	6218.73	45	9680.38	45	13823.1	45	3925.86	45	3491.71	45	7162.75	45	6657.49	45	4601.53	45	4666.1	45	5701.88	45	8021.48	45	15274.3	45	5042.33	45
					50	19086	50	10047.5	50	12959.9	50	10971	50	10308.5	50	8512.38	50	10092.4	50	10888.7	50	14102.4	50	5327.86	50	9490.07	50	11685.5	50	3855.16	50	3355.66	50	7128.89	50	7080.44	50	4865.81	50	4755.22	50	5360.2	50	8195.21	50	16201.8	50	4296.81	50
					55	18368.6	55	8052.98	55	14745.5	55	11764.3	55	9533.94	55	8893.79	55	10028.5	55	10604	55	14086.3	55	5112.05	55	8199	55	10560	55	3620.44	55	3547.74	55	8263.22	55	7230.83	55	5266.63	55	4621.61	55	5213.63	55	8296.91	55	15413.1	55	3985.17	55
					60	17987.2	60	7981.49	60	14902.8	60	12231.1	60	9161.94	60	8705.71	60	10527.6	60	10613.8	60	12457.7	60	4904.52	60	7891.3	60	11185.1	60	3678.76	60	3570.41	60	7678.33	60	7345.12	60	4564.11	60	3975.3	60	5006.94	60	8148.76	60	13977.8	60	3599.64	60
					65	18937.4	65	8771.89	65	13502.1	65	10948.1	65	9154.26	65	7442.49	65	10607.1	65	9849.93	65	11477	65	4761.68	65	7866.66	65	10708.1	65	3767.73	65	4051.78	65	6335.63	65	6500.45	65	4446.15	65	3684.86	65	5003.17	65	8140.83	65	12113.2	65	3611.11	65
					70	18112.8	70	8974.36	70	12917.8	70	10726.5	70	9700.92	70	6426.29	70	10389.6	70	9175.91	70	11360.8	70	4404.57	70	8379.06	70	10593.1	70	3701.75	70	3919.27	70	6041.39	70	5861.71	70	4255.32	70	3876.24	70	5460.56	70	7325.41	70	12212.2	70	3704.72	70
					75	17608.7	75	8181.65	75	12838.8	75	10544.8	75	10975.5	75	5960.85	75	9825.15	75	9451.1	75	12017.8	75	4574.73	75	8248.51	75	9974.32	75	3836.14	75	3274.85	75	6260.12	75	5861.2	75	4629.31	75	3822.75	75	5093.1	75	7178.3	75	13508.2	75	3699.58	75
					80	18211.6	80	9096.62	80	12551.6	80	10437.1	80	9457.22	80	5994.79	80	8715.09	80	9557.85	80	12774.4	80	4577.73	80	7675.18	80	10653.7	80	3622.19	80	3461.85	80	5756	80	6268.39	80	5232.29	80	3637.99	80	5070.23	80	7006.47	80	13065.5	80	3913.3	80
					85	16919.3	85	8072.56	85	11858.8	85	10483	85	8192.25	85	5926.18	85	8542.7	85	9877.81	85	11172.8	85	4307.35	85	7426	85	11103	85	3532.81	85	3483.2	85	5540.25	85	6211.69	85	4837.83	85	3446.86	85	4893.27	85	7032.59	85	11127.4	85	3949.35	85
					90	17979.2	90	7000.13	90	11882	90	10320	90	8740.26	90	7331.55	90	8361.74	90	9833.68	90	9909.55	90	4173.19	90	7582.23	90	10989.1	90	3373	90	3245.31	90	5222.96	90	4768.7	90	4207.15	90	3832.91	90	4694.06	90	7185.03	90	8747.08	90	3854.64	90
					95	17575.1	95	6993.74	95	11642.9	95	10624.4	95	7968.98	95	9104.4	95	8453.9	95	10259.1	95	8933.78	95	4280.79	95	7608.93	95	9965.28	95	3253.84	95	3204.58	95	5232.98	95	4351.76	95	4304.34	95	3763.6	95	4062.78	95	7040.68	95	7049.01	95	3650.11	95
					100	15866.1	100	6391.94	100	12403.1	100	11241.3	100	6948.14	100	8390.67	100	8848.83	100	11945.9	100	8493.93	100	3953.04	100	7842.39	100	10374.3	100	3146.4	100	3190.35	100	5600.07	100	4990.42	100	4383.01	100	3264.58	100	3960.78	100	7293.67	100	6047.54	100	4004.48	100
[truncated: 17 more columns]

## Sheet: IF Normalised
					0		0		0		0		0		0		0		0		0		0		0		0		0		0		0		0		0		0		0		0		0		0		0
					5	21024	5	24017.8	5	20016.2	5	25320.4	5	15407.3	5	17079.2	5	14289.6	5	18185.8	5	14004.6	5	14568.4	5	15252.8	5	21485.8	5	8130.7	5	4632.15	5	8945.6	5	11204.4	5	8346.11	5	10262.3	5	13072.6	5	12995.6	5	15116.3	5	11179.7	5
					10	21168	10	20396.5	10	16111.4	10	20151.4	10	11976.1	10	15339.1	10	13817.9	10	14452.9	10	12298.6	10	11219.9	10	14112	10	19264.7	10	6896.56	10	4250.11	10	7573.86	10	10304.8	10	7244.72	10	8868.96	10	11729.7	10	12418.5	10	12396.3	10	10168.9	10
					15	16760	15	14971.3	15	14422.1	15	15406.7	15	10161.4	15	11472.4	15	13420.8	15	11725	15	11292.9	15	8462.09	15	11310.2	15	15367.4	15	5708.14	15	3854.95	15	7256.96	15	8490.83	15	6744.45	15	6257.24	15	9623.45	15	10297.2	15	12500.6	15	7034.78	15
					20	15725.2	20	12588.4	20	13086.5	20	14431.9	20	10069.5	20	9117.86	20	12376.3	20	12226.9	20	11531.9	20	7269.15	20	9159.28	20	12432	20	5210.09	20	3529.3	20	6770.21	20	7175.78	20	5535.32	20	5322.99	20	8619.44	20	8458.34	20	11717.6	20	5400.36	20
					25	16197.9	25	12946.4	25	13140.3	25	15213.2	25	9824.39	25	8598.68	25	12352.3	25	12910.9	25	11760.4	25	6796.97	25	9036.17	25	12313	25	4704.4	25	3498.73	25	7735.99	25	7158.65	25	5328.52	25	5077.8	25	8271.79	25	8284.06	25	11156.6	25	5149.41	25
					30	16880.3	30	12578.8	30	13565.8	30	14985.2	30	10286.2	30	9572.4	30	11965.2	30	12506.4	30	11183.3	30	5986.57	30	9091.69	30	12185.1	30	4313.67	30	3549.83	30	8052.19	30	7220.58	30	6384.63	30	5703.42	30	7508.95	30	8269.26	30	11110.8	30	4909.53	30
					35	19223.2	35	12065.4	35	13878.6	35	12860.4	35	10189.5	35	10490.6	35	11693.8	35	11283.6	35	11304.8	35	5850.69	35	9010.44	35	12948.8	35	4130.5	35	3575.84	35	6613.87	35	6904.51	35	4967.45	35	6132.18	35	6615.06	35	8104.78	35	11500	35	5215.45	35
					40	20047.5	40	11339.3	40	14094.5	40	12502.5	40	10473.4	40	9500.97	40	11173	40	11785.9	40	11046.1	40	5988.92	40	8949.53	40	13947.6	40	4031.94	40	3649.62	40	6910.24	40	6581.35	40	4523.15	40	5276.44	40	6546.02	40	7780.21	40	12966.6	40	5538.35	40
					45	19397.1	45	10877.1	45	13414.9	45	11294.6	45	10748.5	45	7944.88	45	10927.1	45	11532.1	45	11780.6	45	6218.73	45	9680.38	45	13823.1	45	3925.86	45	3491.71	45	7162.75	45	6657.49	45	4601.53	45	4666.1	45	5701.88	45	8021.48	45	15274.3	45	5042.33	45
					50	19086	50	10047.5	50	12959.9	50	10971	50	10308.5	50	8512.38	50	10092.4	50	10888.7	50	14102.4	50	5327.86	50	9490.07	50	11685.5	50	3855.16	50	3355.66	50	7128.89	50	7080.44	50	4865.81	50	4755.22	50	5360.2	50	8195.21	50	16201.8	50	4296.81	50
					55	18368.6	55	8052.98	55	14745.5	55	11764.3	55	9533.94	55	8893.79	55	10028.5	55	10604	55	14086.3	55	5112.05	55	8199	55	10560	55	3620.44	55	3547.74	55	8263.22	55	7230.83	55	5266.63	55	4621.61	55	5213.63	55	8296.91	55	15413.1	55	3985.17	55
					60	17987.2	60	7981.49	60	14902.8	60	12231.1	60	9161.94	60	8705.71	60	10527.6	60	10613.8	60	12457.7	60	4904.52	60	7891.3	60	11185.1	60	3678.76	60	3570.41	60	7678.33	60	7345.12	60	4564.11	60	3975.3	60	5006.94	60	8148.76	60	13977.8	60	3599.64	60
					65	18937.4	65	8771.89	65	13502.1	65	10948.1	65	9154.26	65	7442.49	65	10607.1	65	9849.93	65	11477	65	4761.68	65	7866.66	65	10708.1	65	3767.73	65	4051.78	65	6335.63	65	6500.45	65	4446.15	65	3684.86	65	5003.17	65	8140.83	65	12113.2	65	3611.11	65
					70	18112.8	70	8974.36	70	12917.8	70	10726.5	70	9700.92	70	6426.29	70	10389.6	70	9175.91	70	11360.8	70	4404.57	70	8379.06	70	10593.1	70	3701.75	70	3919.27	70	6041.39	70	5861.71	70	4255.32	70	3876.24	70	5460.56	70	7325.41	70	12212.2	70	3704.72	70
					75	17608.7	75	8181.65	75	12838.8	75	10544.8	75	10975.5	75	5960.85	75	9825.15	75	9451.1	75	12017.8	75	4574.73	75	8248.51	75	9974.32	75	3836.14	75	3274.85	75	6260.12	75	5861.2	75	4629.31	75	3822.75	75	5093.1	75	7178.3	75	13508.2	75	3699.58	75
					80	18211.6	80	9096.62	80	12551.6	80	10437.1	80	9457.22	80	5994.79	80	8715.09	80	9557.85	80	12774.4	80	4577.73	80	7675.18	80	10653.7	80	3622.19	80	3461.85	80	5756	80	6268.39	80	5232.29	80	3637.99	80	5070.23	80	7006.47	80	13065.5	80	3913.3	80
					85	16919.3	85	8072.56	85	11858.8	85	10483	85	8192.25	85	5926.18	85	8542.7	85	9877.81	85	11172.8	85	4307.35	85	7426	85	11103	85	3532.81	85	3483.2	85	5540.25	85	6211.69	85	4837.83	85	3446.86	85	4893.27	85	7032.59	85	11127.4	85	3949.35	85
					90	17979.2	90	7000.13	90	11882	90	10320	90	8740.26	90	7331.55	90	8361.74	90	9833.68	90	9909.55	90	4173.19	90	7582.23	90	10989.1	90	3373	90	3245.31	90	5222.96	90	4768.7	90	4207.15	90	3832.91	90	4694.06	90	7185.03	90	8747.08	90	3854.64	90
					95	17575.1	95	6993.74	95	11642.9	95	10624.4	95	7968.98	95	9104.4	95	8453.9	95	10259.1	95	8933.78	95	4280.79	95	7608.93	95	9965.28	95	3253.84	95	3204.58	95	5232.98	95	4351.76	95	4304.34	95	3763.6	95	4062.78	95	7040.68	95	7049.01	95	3650.11	95
					100	15866.1	100	6391.94	100	12403.1	100	11241.3	100	6948.14	100	8390.67	100	8848.83	100	11945.9	100	8493.93	100	3953.04	100	7842.39	100	10374.3	100	3146.4	100	3190.35	100	5600.07	100	4990.42	100	4383.01	100	3264.58	100	3960.78	100	7293.67	100	6047.54	100	4004.48	100
					0		0		0		0		0		0		0		0		0		0		0		0		0		0		0		0		0		0		0		0		0		0		0
					5	1	5	1	5	1	5	1	5	1	5	1	5	1	5	1	5	1	5	1	5	1	5	1	5	1	5	1	5	1	5	1	5	1	5	1	5	1	5	1	5	1	5	1	5
					10	1.00685	10	0.849227	10	0.804916	10	0.795855	10	0.777298	10	0.898118	10	0.966986	10	0.794738	10	0.878178	10	0.770156	10	0.925205	10	0.896625	10	0.848212	10	0.917525	10	0.846658	10	0.919715	10	0.868035	10	0.864224	10	0.897279	10	0.95559	10	0.820058	10	0.909586	10
					15	0.797184	15	0.623341	15	0.720523	15	0.608469	15	0.659515	15	0.67172	15	0.939195	15	0.644732	15	0.806369	15	0.580853	15	0.741516	15	0.715238	15	0.702047	15	0.832216	15	0.811232	15	0.757814	15	0.808095	15	0.609729	15	0.736156	15	0.792363	15	0.826959	15	0.629247	15
					20	0.747964	20	0.524128	20	0.653797	20	0.569973	20	0.653549	20	0.533858	20	0.8661	20	0.67233	20	0.823437	20	0.498967	20	0.600497	20	0.578614	20	0.640792	20	0.761915	20	0.756819	20	0.640445	20	0.663222	20	0.518692	20	0.659353	20	0.650861	20	0.775165	20	0.483051	20
					25	0.770448	25	0.539033	25	0.656482	25	0.600827	25	0.637643	25	0.50346	25	0.864423	25	0.709943	25	0.839754	25	0.466556	25	0.592426	25	0.573077	25	0.578598	25	0.755316	25	0.864782	25	0.638916	25	0.638444	25	0.4948	25	0.63276	25	0.637451	25	0.738047	25	0.460605	25
					30	0.802905	30	0.52373	30	0.677741	30	0.591824	30	0.667618	30	0.560472	30	0.837337	30	0.687701	30	0.798544	30	0.410929	30	0.596066	30	0.567125	30	0.530541	30	0.766345	30	0.900129	30	0.644443	30	0.764983	30	0.555763	30	0.574405	30	0.636311	30	0.73502	30	0.439148	30
					35	0.914346	35	0.502355	35	0.693368	35	0.507908	35	0.661344	35	0.614235	35	0.818342	35	0.620464	35	0.80722	35	0.401602	35	0.590739	35	0.602666	35	0.508012	35	0.77196	35	0.739343	35	0.616233	35	0.595181	35	0.597542	35	0.506026	35	0.623655	35	0.760764	35	0.466512	35
					40	0.953553	40	0.47212	40	0.704152	40	0.493772	40	0.679769	40	0.556289	40	0.781894	40	0.648082	40	0.788745	40	0.41109	40	0.586746	40	0.649155	40	0.49589	40	0.787889	40	0.772473	40	0.587392	40	0.541947	40	0.514156	40	0.500745	40	0.59868	40	0.857786	40	0.495394	40
					45	0.922619	45	0.452878	45	0.6702	45	0.446066	45	0.697622	45	0.465179	45	0.764684	45	0.634126	45	0.841194	45	0.426865	45	0.634661	45	0.643361	45	0.482844	45	0.753799	45	0.8007	45	0.594187	45	0.551338	45	0.454682	45	0.436171	45	0.617245	45	1.01045	45	0.451026	45
					50	0.907818	50	0.418336	50	0.647472	50	0.433288	50	0.669062	50	0.498407	50	0.706274	50	0.598745	50	1.00698	50	0.365714	50	0.622184	50	0.543873	50	0.474149	50	0.724429	50	0.796915	50	0.631935	50	0.583003	50	0.463367	50	0.410034	50	0.630614	50	1.07181	50	0.38434	50
					55	0.873697	55	0.335292	55	0.736679	55	0.464617	55	0.618792	55	0.520738	55	0.701802	55	0.583095	55	1.00583	55	0.3509	55	0.53754	55	0.491486	55	0.44528	55	0.765895	55	0.923718	55	0.645358	55	0.631028	55	0.450347	55	0.398822	55	0.638439	55	1.01963	55	0.356465	55
					60	0.855557	60	0.332316	60	0.744538	60	0.483054	60	0.594648	60	0.509726	60	0.73673	60	0.583629	60	0.889544	60	0.336655	60	0.517366	60	0.520583	60	0.452453	60	0.77079	60	0.858336	60	0.655559	60	0.546855	60	0.387368	60	0.383011	60	0.62704	60	0.924681	60	0.321981	60
					65	0.900753	65	0.365225	65	0.674559	65	0.432382	65	0.59415	65	0.435764	65	0.742293	65	0.541627	65	0.819516	65	0.32685	65	0.515751	65	0.49838	65	0.463396	65	0.874709	65	0.70824	65	0.580171	65	0.532721	65	0.359066	65	0.382722	65	0.62643	65	0.801329	65	0.323006	65
					70	0.861529	70	0.373655	70	0.645365	70	0.423632	70	0.62963	70	0.376264	70	0.727075	70	0.504565	70	0.811217	70	0.302337	70	0.549345	70	0.49303	70	0.455281	70	0.846103	70	0.675347	70	0.523163	70	0.509856	70	0.377716	70	0.417711	70	0.563684	70	0.807884	70	0.331379	70
					75	0.837554	75	0.34065	75	0.641421	75	0.416456	75	0.712355	75	0.349013	75	0.687572	75	0.519696	75	0.858128	75	0.314018	75	0.540786	75	0.464229	75	0.471809	75	0.706983	75	0.699799	75	0.523118	75	0.554666	75	0.372503	75	0.389602	75	0.552363	75	0.893617	75	0.33092	75
					80	0.866228	80	0.378746	80	0.627073	80	0.412202	80	0.613813	80	0.351	80	0.609889	80	0.525566	80	0.912155	80	0.314223	80	0.503198	80	0.495848	80	0.445495	80	0.747353	80	0.643445	80	0.55946	80	0.626914	80	0.3545	80	0.387852	80	0.539141	80	0.864333	80	0.350037	80
					85	0.804762	85	0.336108	85	0.592459	85	0.414016	85	0.531711	85	0.346982	85	0.597825	85	0.54316	85	0.797795	85	0.295664	85	0.486861	85	0.516759	85	0.434502	85	0.751962	85	0.619326	85	0.554399	85	0.579651	85	0.335875	85	0.374316	85	0.541151	85	0.736115	85	0.353261	85
					90	0.855173	90	0.291456	90	0.593618	90	0.407578	90	0.567279	90	0.429268	90	0.585161	90	0.540734	90	0.707591	90	0.286455	90	0.497103	90	0.51146	90	0.414848	90	0.700606	90	0.583858	90	0.425611	90	0.504085	90	0.373493	90	0.359077	90	0.552881	90	0.578651	90	0.34479	90
					95	0.835956	95	0.29119	95	0.581674	95	0.4196	95	0.51722	95	0.53307	95	0.591611	95	0.564128	95	0.637917	95	0.293841	95	0.498853	95	0.463808	95	0.400192	95	0.691813	95	0.584977	95	0.388399	95	0.515729	95	0.36674	95	0.310786	95	0.541774	95	0.466318	95	0.326495	95
					100	0.754667	100	0.266134	100	0.619654	100	0.443961	100	0.450963	100	0.491281	100	0.619248	100	0.656878	100	0.606508	100	0.271344	100	0.51416	100	0.482846	100	0.386977	100	0.688741	100	0.626014	100	0.4454	100	0.525155	100	0.318113	100	0.302984	100	0.561241	100	0.400067	100	0.358193	100
[truncated: 17 more columns]

## Sheet: Summary (N)
% Chromosome Length		Mean	STDDEV	SEM		Mean	STDDEV	SEM
0-5	IF	1	0	0	FISH	1174.11	586.615	108.932
5-10		0.878325	0.068701	0.0127575		1896.98	1026.41	190.599
10-15		0.725916	0.0894195	0.0166048		3048.58	1523.93	282.987
15-20		0.645565	0.100321	0.0186292		3929.28	1833.43	340.46
20-25		0.642507	0.120377	0.0223535		4170.39	2180.37	404.885
25-30		0.643857	0.120669	0.0224077		3830.76	2231.86	414.445
30-35		0.623492	0.122292	0.022709		3099.6	2086.76	387.502
35-40		0.625968	0.134784	0.0250287		2330.82	1857.96	345.015
40-45		0.619444	0.152981	0.0284079		1683.57	1504.9	279.453
45-50		0.618052	0.173403	0.0322		1162.32	1050.3	195.036
50-55		0.616044	0.182984	0.0339794		810.098	700.765	130.129
55-60		0.595271	0.173515	0.0322209		605.163	504.462	93.6762
60-65		0.571765	0.16888	0.0313602		502.198	397.067	73.7335
65-70		0.549963	0.159943	0.0297007		411.642	259.618	48.2098
70-75		0.548696	0.165231	0.0306826		355.825	186.723	34.6737
75-80		0.545752	0.159269	0.0295756		319.493	140.636	26.1155
80-85		0.522672	0.139647	0.0259318		294.433	115.402	21.4296
85-90		0.50376	0.127621	0.0236985		277.723	103.482	19.2161
90-95		0.494359	0.127868	0.0237445		264.149	90.8339	16.8674
95-100		0.487756	0.122795	0.0228025		245.425	76.9703	14.293
