# Supplementary material for: Large domains of heterochromatin direct the formation of short mitotic chromosome loops
Source: eLife. 2020 Sep 11;9:e57212. doi: 10.7554/eLife.57212 (PMC7515631; doi:10.7554/eLife.57212)
Supplement: Figure 5—figure supplement 1—source data 5. [file elife-57212-fig5-figsupp1-data5.xlsx]

## Sheet: FISH Binned
9	7	FISH	9		12		13		15		17		18		21		26			37	1		23		32		33		37			4		5		6		10		21		26		29		5		6
X	X	Y	X	Y	X	Y	X	Y	X	Y	X	Y	X	Y	X	Y	X	Y		X	X	Y	X	Y	X	Y	X	Y	X	Y	X	Y	X	Y	X	Y	X	Y	X	Y	X	Y	X	Y	X	Y	X	Y	X
0	0	167	0	144	0	217	0	161	0	178	0	163	0	158	0	150	0	203		0	0	242	0	276	0	338	0	352	0	271	0	196	0	177	0	232	0	208	0	180	0	230	0	168	0	203	0	225	0
0.5492	1.42853	167.13	0.645145	154.88	1.92303	225.024	1.72409	179.44	1.85181	180.032	1.3333	158.199	1.4925	160.053	1.04164	160.99	1.96074	215.33		0.11	1.81818	245.01	1.5625	254.61	3.44828	392.71	1.35135	350.37	1.31579	258.71	1.5873	194.2	1.5873	169.72	2.12766	264.085	2.08333	208	1.66667	184.12	2.08333	229.117	2	177.268	1.88675	180.363	2	210.71	1.85185
1.0984	2.85707	165.02	1.29029	148.04	3.84606	222.165	3.44819	165.72	3.70362	174.677	2.6666	169.274	2.985	168.153	2.08328	155.4	3.92147	225.65		0.22	3.63636	254.72	3.125	262.5	6.89655	432.87	2.7027	375.84	2.63158	266.78	3.1746	184.62	3.1746	172.5	4.25532	270.246	4.16667	214	3.33333	179.22	4.16667	212.883	4	173.817	3.77349	197.412	4	217.06	3.7037
1.6476	4.2856	167.92	1.93544	145.56	5.76909	225.503	5.17228	168.09	5.55542	174.882	3.9999	170.644	4.4775	169.836	3.12492	159.86	5.88221	218.31		0.33	5.45455	247.99	4.6875	253.85	10.3448	423.08	4.05405	364.95	3.94737	272.75	4.7619	167.27	4.7619	159.96	6.38298	263.985	6.25	235	5	175.62	6.25	222.68	6	172.132	5.66024	195.282	6	224.11	5.55556
2.1969	5.7144	165.3	2.5807	149.28	7.69247	237.412	6.89669	168.12	7.40757	177.991	5.33345	160.994	5.97027	165.896	4.16675	162.49	7.8433	222.13		0.44	7.27273	230.9	6.25	259.57	13.7931	424.51	5.40541	370.56	5.26316	284.23	6.34921	177.74	6.34921	170.24	8.51064	255.737	8.33333	251	6.66667	184.73	8.33333	225.342	8	178.291	7.54733	197.21	8	239.77	7.40741
2.7461	7.14293	168.36	3.22584	153.11	9.6155	259.029	8.62079	170.56	9.25938	177.823	6.66675	161.203	7.46278	171.205	5.20839	161.96	9.80403	218.82		0.55	9.09091	237.59	7.8125	267.29	17.2414	455.48	6.75676	403.89	6.57895	256.4	7.93651	178.21	7.93651	176.12	10.6383	238.281	10.4167	243	8.33333	207.75	10.4167	226.014	10	176.824	9.43408	201.935	10	225.14	9.25926
3.2953	8.57147	173.75	3.87099	148.16	11.5385	273.325	10.3449	174.23	11.1112	182.079	8.00005	162.35	8.95528	177.078	6.25004	158.23	11.7648	234.27		0.66	10.9091	230.37	9.375	275.31	20.6897	473.94	8.10811	407.64	7.89474	250.14	9.52381	167.22	9.52381	176.94	12.766	221.382	12.5	249	10	200.3	12.5	224.857	12	176.474	11.3208	213.631	12	215.91	11.1111
3.8445	10	175.02	4.51614	152.02	13.4616	302.254	12.069	181.29	12.963	181.565	9.33335	175.086	10.4478	182.425	7.29168	169.75	13.7255	235.47		0.77	12.7273	230.2	10.9375	276.76	24.1379	535.58	9.45946	421.81	9.21053	251.28	11.1111	173.54	11.1111	174.61	14.8936	215.173	14.5833	226	11.6667	200.68	14.5833	223.865	14	171.201	13.2076	218.526	14	205.52	12.963
4.3937	11.4285	167.82	5.16128	152.85	15.3846	306.305	13.7931	188.64	14.8148	184.401	10.6667	167.52	11.9403	182.343	8.33332	164.26	15.6862	220.74		0.88	14.5455	231.55	12.5	273.1	27.5862	539.89	10.8108	421.61	10.5263	236.96	12.6984	185.45	12.6984	179.23	17.0213	210.933	16.6667	230	13.3333	205.19	16.6667	226.744	16	175.168	15.0943	221.95	16	208	14.8148
4.9429	12.8571	172.79	5.80643	150.61	17.3076	294.373	15.5172	190.6	16.6666	190.963	12	159.864	13.4328	194.554	9.37496	165.73	17.647	217.21		0.99	16.3636	235.59	14.0625	268.83	31.0345	538.48	12.1622	415.57	11.8421	241.21	14.2857	188.1	14.2857	183.92	19.1489	216.345	18.75	240	15	196.15	18.75	231.972	18	179.067	16.9811	225.948	18	230.71	16.6667
5.4921	14.2856	179.24	6.45157	143.09	19.2306	305.858	17.2413	203.29	18.5184	202.527	13.3333	161.483	14.9253	192.646	10.4166	166.82	19.6077	222.59		1.1	18.1818	226.17	15.625	265.52	34.4828	545.37	13.5135	432.53	13.1579	240.69	15.873	195.04	15.873	186.89	21.2766	229.717	20.8333	225	16.6667	210.7	20.8333	236.241	20	175.767	18.8678	235.22	20	219.53	18.5185
6.0414	15.7144	185.21	7.09683	149.7	21.154	299.716	18.9657	202.37	20.3706	194.493	14.6668	162.02	16.4181	185.672	11.4584	165.22	21.5688	224.46		1.21	20	224.35	17.1875	248.4	37.931	630.4	14.8649	455.28	14.4737	242.8	17.4603	189.22	17.4603	178.95	23.4043	218.393	22.9167	230	18.3333	193.36	22.9167	241.944	22	178.006	20.7549	246.321	22	228.98	20.3704
6.5906	17.1429	181.5	7.74198	152.4	23.0771	290.855	20.6898	207.41	22.2224	196.436	16.0001	165.641	17.9106	189.823	12.5001	158.51	23.5295	233.55		1.32	21.8182	225.88	18.75	258.89	41.3793	750.79	16.2162	461.61	15.7895	257.78	19.0476	192.54	19.0476	184.16	25.5319	234.647	25	211	20	196.69	25	233.809	24	183.505	22.6417	257.744	24	238.62	22.2222
7.1398	18.5715	174.43	8.38712	155.01	25.0001	279.522	22.4139	214.61	24.0742	196.001	17.3334	168.583	19.4031	188.751	13.5417	156.54	25.4903	235.08		1.43	23.6364	233.32	20.3125	264.5	44.8276	848.14	17.5676	474.48	17.1053	260.76	20.6349	197.22	20.6349	178.49	27.6596	230.7	27.0833	217	21.6667	190.39	27.0833	230.879	26	186.222	24.5284	272.658	26	240.74	24.0741
7.689	20	180.47	9.03227	155.68	26.9231	266.624	24.138	206.2	25.926	182.626	18.6667	171.564	20.8956	193.193	14.5834	162.32	27.451	235.75		1.54	25.4545	241.82	21.875	249.52	48.2759	1074.08	18.9189	484.87	18.4211	254.7	22.2222	206.58	22.2222	186.49	29.7872	219.973	29.1667	225	23.3333	206.56	29.1667	230.607	28	184.174	26.4151	268.954	28	232.95	25.9259
8.2382	21.4285	182.28	9.67742	152.22	28.8461	258.237	25.862	198.9	27.7778	188.852	20	168.255	22.3881	190.309	15.625	156.79	29.4117	240.1		1.65	27.2727	241.29	23.4375	259.64	51.7241	1340.05	20.2703	491.48	19.7368	262.14	23.8095	189.3	23.8095	192.67	31.9149	225.762	31.25	234	25	203.14	31.25	225.993	30	182.257	28.3019	255.259	30	225.51	27.7778
8.7874	22.8571	173.14	10.3226	147.39	30.7692	253.949	27.5861	222.72	29.6296	192.863	21.3333	169.163	23.8806	184.527	16.6666	160.66	31.3725	240.98		1.76	29.0909	249.76	25	262.34	55.1724	1500.4	21.6216	504.01	21.0526	276.52	25.3968	194.82	25.3968	189.26	34.0426	234.784	33.3333	254	26.6667	213.08	33.3333	235.804	32	188.598	30.1886	253.34	32	229.87	29.6296
9.3366	24.2856	171.74	10.9677	150.98	32.6922	249.347	29.3102	224.15	31.4814	189.272	22.6666	170.769	25.3731	180.847	17.7083	170.65	33.3332	253.42		1.87	30.9091	247.92	26.5625	274.93	58.6207	1587.01	22.973	488.24	22.3684	293.34	26.9841	192.37	26.9841	180	36.1702	235.584	35.4167	256	28.3333	217.29	35.4167	238.105	34	194.682	32.0754	238.342	34	237.53	31.4815
9.8858	25.7141	174.25	11.6129	153.41	34.6152	248.481	31.0343	213.5	33.3332	190.407	23.9999	167.273	26.8656	187.776	18.7499	169.66	35.2939	245.87		1.98	32.7273	252.36	28.125	293.43	62.069	1700.94	24.3243	492.99	23.6842	287.75	28.5714	195.24	28.5714	182.95	38.2979	240.35	37.5	262	30	220.63	37.5	246.939	36	212.328	33.9621	239.922	36	231.42	33.3333
10.4351	27.1429	177.32	12.2581	149.36	36.5386	254.223	32.7587	216.11	35.1854	191.453	25.3334	171.258	28.3583	185.318	19.7917	156.87	37.255	258.43		2.09	34.5455	243.07	29.6875	293.83	65.5172	1764.24	25.6757	494.78	25	268.02	30.1587	194.43	30.1587	188.2	40.4255	266.847	39.5833	245	31.6667	222.12	39.5833	247.983	38	238.826	35.8492	251.092	38	259.8	35.1852
10.9843	28.5715	177.42	12.9033	147.76	38.4616	253.677	34.4828	235.23	37.0372	193.543	26.6667	172.246	29.8508	183.239	20.8334	152.78	39.2158	260.28		2.2	36.3636	249.32	31.25	302.9	68.9655	1693.32	27.027	506.5	26.3158	276.28	31.746	196.05	31.746	187.22	42.5532	266.51	41.6667	255	33.3333	210.75	41.6667	245.392	40	249.261	37.736	255.925	40	272	37.037
11.5335	30	186.97	13.5484	149.74	40.3847	252.907	36.2069	225.66	38.889	202.088	28	170.385	31.3433	194.251	21.875	147.48	41.1765	266.5		2.31	38.1818	262.6	32.8125	295.03	72.4138	1459.8	28.3784	528.62	27.6316	279.02	33.3333	201.75	33.3333	196.91	44.6809	261.334	43.75	246.515	35	202.82	43.75	249.294	42	247.65	39.6227	272.567	42	267.87	38.8889
12.0827	31.4285	180	14.1936	149.73	42.3077	259.844	37.931	234.14	40.7408	218.087	29.3333	167.704	32.8358	194.592	22.9167	165.21	43.1372	270.56		2.42	40	263.35	34.375	282.69	75.8621	1140.15	29.7297	560.42	28.9474	261.08	34.9206	208.52	34.9206	207.44	46.8085	253.208	45.8333	246.07	36.6667	207.1	45.8333	256.059	44	252.437	41.5095	280.173	44	266.8	40.7407
12.6319	32.8571	173.34	14.8387	152.62	44.2307	285.659	39.6551	257.94	42.5926	218.02	30.6667	170.336	34.3283	188.002	23.9583	166.92	45.098	283.93		2.53	41.8182	276.25	35.9375	284.39	79.3103	909.34	31.0811	548.19	30.2632	258.9	36.5079	210.76	36.5079	206.92	48.9362	259.373	47.9167	270.433	38.3333	217.52	47.9167	284.104	46	245.527	43.3962	295.966	46	268.56	42.5926
13.1811	34.2856	172.36	15.4838	156.33	46.1538	286.475	41.3792	275.18	44.4444	222.643	32	175.178	35.8208	195.846	25	166.09	47.0587	296.25		2.64	43.6364	305.28	37.5	292.41	82.7586	707.38	32.4324	554.71	31.5789	259.85	38.0952	211.15	38.0952	217.34	51.0638	271.582	50	272.25	40	213.56	50	278.795	48	244.731	45.283	328.379	48	282.9	44.4444
13.7303	35.7141	175.06	16.129	145.6	48.0768	317.044	43.1033	309.78	46.2962	221.445	33.3333	176.374	37.3133	202.859	26.0416	165.3	49.0195	314.87		2.75	45.4545	331.43	39.0625	292.13	86.2069	548.18	33.7838	550.38	32.8947	249.08	39.6825	214.14	39.6825	231.51	53.1915	290.676	52.0833	285.939	41.6667	212.11	52.0833	286.612	50	233.751	47.1697	336.087	50	292.38	46.2963
14.2796	37.1429	176.8	16.7742	152.29	50.0002	334.966	44.8277	346.86	48.1484	222.021	34.6668	178.717	38.8061	201.332	27.0834	163.44	50.9805	335.77		2.86	47.2727	337.83	40.625	292.09	89.6552	479.26	35.1351	543.89	34.2105	258.44	41.2698	219.27	41.2698	218.25	55.3191	317.91	54.1667	286.564	43.3333	213.77	54.1667	307.9	52	232.72	49.0568	372.585	52	300	48.1481
14.8288	38.5715	177.64	17.4194	150.92	51.9232	378.807	46.5518	413.52	50.0002	217.324	36.0001	173.754	40.2986	197.682	28.1251	159.02	52.9413	377.33		2.97	49.0909	342.18	42.1875	306.03	93.1034	414.51	36.4865	553.05	35.5263	268.94	42.8571	217.52	42.8571	205.54	57.4468	328.499	56.25	291.753	45	212.52	56.25	341.971	54	253.885	50.9435	454.831	54	312.73	50
15.378	40	175.77	18.0645	145.02	53.8462	425.069	48.2759	466.49	51.852	224.811	37.3334	177.951	41.7911	205.946	29.1667	171.34	54.902	436.7		3.08	50.9091	339.18	43.75	305.8	96.5517	367.41	37.8378	537.26	36.8421	269.94	44.4444	237.08	44.4444	197.48	59.5745	354.848	58.3333	318.263	46.6667	224.66	58.3333	399.389	56	272.212	52.8303	521.75	56	340.99	51.8519
15.9272	41.4285	179.09	18.7097	147.23	55.7693	458.091	50	511.01	53.7038	226.347	38.6667	184.213	43.2836	199.481	30.2083	173.49	56.8628	495.39		3.19	52.7273	332.36	45.3125	306.43	100	331.34	39.1892	516.34	38.1579	281.47	46.0317	250.17	46.0317	201.61	61.7021	413.529	60.4167	341.194	48.3333	227.43	60.4167	473.286	58	278.384	54.717	599.199	58	396.48	53.7037
16.4764	42.8571	179.64	19.3548	149.08	57.6923	453.981	51.7241	569.02	55.5556	233.939	40	184.469	44.7761	202.851	31.25	176.36	58.8235	525.34		3.3	54.5455	344.64	46.875	306.76			40.5405	510.24	39.4737	274.92	47.619	277.43	47.619	198.77	63.8298	475.633	62.5	356.027	50	242.25	62.5	573.016	60	312.317	56.6038	672.905	60	466.21	55.5556
17.0256	44.2856	181.8	20	150.66	59.6153	483.793	53.4482	648.16	57.4074	252.922	41.3333	184.473	46.2686	215.984	32.2916	178	60.7842	571.56		3.41	56.3636	365.33	48.4375	317.62			41.8919	496.65	40.7895	267.6	49.2063	264.34	49.2063	202.28	65.9574	569.863	64.5833	412.032	51.6667	251.46	64.5833	656.623	62	345.323	58.4905	737.291	62	535.52	57.4074
17.5748	45.7141	191.29	20.6451	151.76	61.5384	485.161	55.1723	798.17	59.2592	261.084	42.6666	182.564	47.7611	217.65	33.3333	176.63	62.745	666.47		3.52	58.1818	405.25	50	326.05			43.2432	497.15	42.1053	281.27	50.7937	325.85	50.7937	219.26	68.0851	660.863	66.6667	515.364	53.3333	238.39	66.6667	788.673	64	345.152	60.3773	809.324	64	608.39	59.2593
18.1241	47.1429	192.16	21.2904	150.73	63.4617	484.862	56.8967	993.34	61.1114	295.346	44.0001	178.7	49.2539	226.046	34.3751	178.37	64.7061	766.68		3.63	60	438.34	51.5625	314.46			44.5946	514.77	43.4211	287.53	52.381	326.55	52.381	220.58	70.2128	796.132	68.75	675.36	55	240.71	68.75	922.255	66	378.98	62.2644	883.529	66	737.71	61.1111
18.6733	48.5715	194.98	21.9355	151.61	65.3848	526.02	58.6208	1335.35	62.9632	351.497	45.3334	182.05	50.7464	241.405	35.4167	177.16	66.6668	942.82		3.74	61.8182	488.65	53.125	328.69			45.9459	526.77	44.7368	290.98	53.9683	338.31	53.9683	227.58	72.3404	914.781	70.8333	864.602	56.6667	252.1	70.8333	994.555	68	433.473	64.1511	940.505	68	910.17	62.963
19.2225	50	203.1	22.5807	148.01	67.3078	609.178	60.3449	1755.25	64.815	400.925	46.6667	180.259	52.2389	261.646	36.4584	176.88	68.6275	1278.75		3.85	63.6364	547.04	54.6875	331.73			47.2973	496.65	46.0526	292.54	55.5556	401.84	55.5556	227.59	74.4681	1022.87	72.9167	1064.31	58.3333	252.86	72.9167	1040.51	70	498.102	66.0379	1018.69	70	1035.15	64.8148
19.7717	51.4285	208.4	23.2258	153.65	69.2308	704.439	62.069	2146.76	66.6668	521.056	48	184.422	53.7314	273.965	37.5	185.96	70.5883	1826.89		3.96	65.4545	647.13	56.25	329.42			48.6486	495.17	47.3684	306.08	57.1429	498.54	57.1429	229.79	76.5957	1062.3	75	1146.07	60	263.29	75	1040.02	72	550.928	67.9246	1082.06	72	1137.87	66.6667
20.3209	52.8571	206.1	23.871	151.1	71.1539	748.224	63.7931	2449.56	68.5186	649.799	49.3333	179.983	55.2239	284.636	38.5417	176.13	72.549	2387.2		4.07	67.2727	728.3	57.8125	343.04			50	497.41	48.6842	317.84	58.7302	640.34	58.7302	238.34	78.7234	1084.96	77.0833	1095.17	61.6667	285.18	77.0833	961.276	74	588.419	69.8114	1067.28	74	1171.29	68.5185
20.8701	54.2856	204.8	24.5161	150.74	73.0769	875.374	65.5172	2541.46	70.3704	802.619	50.6667	181.34	56.7164	299.29	39.5833	177.84	74.5097	2914.44		4.18	69.0909	881.83	59.375	363.2			51.3514	491.12	50	343.6	60.3175	824.42	60.3175	244.3	80.8511	1138.97	79.1667	1025.25	63.3333	309.02	79.1667	1017.98	76	671.223	71.6981	955.541	76	1224.92	70.3704
21.4193	55.7141	203.39	25.1613	151.75	74.9999	1002.48	67.2413	2525.47	72.2222	869.238	52	177.897	58.2089	320.471	40.6249	176.78	76.4705	3194.09		4.29	70.9091	1088.85	60.9375	387.63			52.7027	501	51.3158	361.03	61.9048	1119.73	61.9048	251.03	82.9787	1185.07	81.25	989.297	65	336.82	81.25	1017.02	78	715.549	73.5849	841.353	78	1190.12	72.2222
21.9685	57.1427	207.62	25.8064	150.77	76.9229	1040.69	68.9654	2411.3	74.074	906.955	53.3333	179.84	59.7014	334.861	41.6666	177.64	78.4312	2949.09		4.4	72.7273	1312.64	62.5	401.71			54.0541	477.2	52.6316	375.23	63.4921	1499.06	63.4921	266.55	85.1064	999.457	83.3333	931.661	66.6667	365.87	83.3333	1025.93	80	782.398	75.4716	740.509	80	1020.09	74.0741
22.5178	58.5715	224.18	26.4517	149.01	78.8463	1101.56	70.6898	2095.63	75.9262	915.343	54.6668	187.741	61.1942	338.079	42.7084	180.83	80.3923	2424.76		4.51	74.5455	1521.7	64.0625	430.94			55.4054	491.76	53.9474	395.54	65.0794	1889.35	65.0794	293.4	87.234	793.443	85.4167	853.571	68.3333	408.9	85.4167	979.892	82	826.473	77.3587	663.151	82	812.71	75.9259
23.067	60	233.68	27.0968	147.41	80.7694	1054.18	72.4139	1637.58	77.778	865.815	56.0001	203.083	62.6867	370.645	43.7501	205.58	82.353	1820.03		4.62	76.3636	1651.63	65.625	486.37			56.7568	464.77	55.2632	439.8	66.6667	2226.25	66.6667	339.15	89.3617	604.045	87.5	780.421	70	477.93	87.5	906.267	84	910.985	79.2454	593.743	84	649.45	77.7778
23.6162	61.4285	267.79	27.742	147.49	82.6924	957.535	74.138	1163.21	79.6298	739.864	57.3334	220.565	64.1792	434.773	44.7917	207.9	84.3138	1281.97		4.73	78.1818	1674.16	67.1875	569.38			58.1081	485.12	56.5789	499.57	68.254	2586.67	68.254	326.84	91.4894	500.22	89.5833	706.951	71.6667	660.48	89.5833	873.615	86	892.793	81.1322	533.155	86	547.17	79.6296
24.1654	62.8571	307.4	28.3871	154.14	84.6154	851.119	75.862	799.84	81.4816	610.949	58.6667	226.868	65.6717	498.241	45.8333	204.19	86.2745	930.08		4.84	80	1557.59	68.75	717.84			59.4595	503.74	57.8947	577.8	69.8413	2759.96	69.8413	344.84	93.617	435.232	91.6667	595.717	73.3333	882.64	91.6667	822.968	88	814.742	83.0189	511.818	88	474.24	81.4815
24.7146	64.2856	353.98	29.0322	154.3	86.5384	761.946	77.5861	583.16	83.3334	482.743	60	251.021	67.1642	548.637	46.875	205.53	88.2352	735.25		4.95	81.8182	1356.17	70.3125	858.52			60.8108	488.3	59.2105	642.66	71.4286	2684.8	71.4286	397.74	95.7447	380.83	93.75	477.619	75	1273.66	93.75	814.814	90	671.897	84.9057	511.179	90	420.27	83.3333
25.2638	65.7141	410.23	29.6774	145.3	88.4615	675.217	79.3102	495.65	85.1852	368.319	61.3333	277.456	68.6567	648.848	47.9166	212.29	90.196	594.25		5.06	83.6364	1128.89	71.875	986.08			62.1622	501.79	60.5263	720.51	73.0159	2637.9	73.0159	429.11	97.8723	357.861	95.8333	358.549	76.6667	1581.9	95.8333	685.987	92	523.46	86.7924	461.56	92	368.75	85.1852
25.813	67.1427	491.93	30.3225	149.47	90.3845	582.348	81.0343	431.54	87.037	301.344	62.6666	277.249	70.1492	811.086	48.9583	206.17	92.1567	497.1		5.17	85.4545	953.75	73.4375	1249.57			63.5135	514.78	61.8421	793.1	74.6032	2554.05	74.6032	508.88	100	348.231	97.9167	318.518	78.3333	1697.45	97.9167	577.751	94	385.664	88.6792	433.784	94	365.19	87.037
26.3623	68.5715	579.28	30.9678	151.01	92.3079	524.755	82.7587	361.62	88.8892	267.645	64.0001	317.611	71.6419	945.376	50.0001	196.68	94.1178	441.51		5.28	87.2727	785.53	75	1448.08			64.8649	533.92	63.1579	895.82	76.1905	2510.74	76.1905	604.97			100	307.089	80	1513.61	100	484.606	96	346.95	90.5663	421.246	96	352.4	88.8889
26.9115	70	637.63	31.6129	150.68	94.2309	454.102	84.4828	323.53	90.741	227.71	65.3334	304.782	73.1344	1053.87	51.0417	194.44	96.0785	396.93		5.39	89.0909	624.76	76.5625	1607.07			66.2162	548.61	64.4737	946.15	77.7778	2392.75	77.7778	743.67					81.6667	1250.41			98	311.771	92.453	392.992	98	343.71	90.7407
27.4607	71.4285	750	32.2581	153.13	96.1539	397.727	86.2069	281.13	92.5928	220.999	66.6667	312.112	74.6269	1089.02	52.0834	199.55	98.0393	367.14		5.5	90.9091	575.32	78.125	1664.21			67.5676	580.12	65.7895	1022.38	79.3651	2183.31	79.3651	931.09					83.3333	941.79			100	291.866	94.3398	381.746	100	298.85	92.5926
28.0099	72.8571	877.44	32.9032	151.97	98.077	330.519	87.931	267.98	94.4446	217.991	68	339.413	76.1194	1048	53.125	205.76	100	329.71		5.61	92.7273	499.67	79.6875	1672.66			68.9189	633.64	67.1053	1206.41	80.9524	1898.64	80.9524	1188.59					85	687.24					96.2265	373.911			94.4444
28.5591	74.2856	939.31	33.5484	149.93	100	284.313	89.6551	244.34	96.2964	208.849	69.3333	343.058	77.6119	960.494	54.1667	207.6				5.72	94.5455	442.05	81.25	1695.29			70.2703	765.85	68.4211	1384.77	82.5397	1592.95	82.5397	1305.58					86.6667	504.37					98.1133	362.046			96.2963
29.1083	75.7141	1023.46	34.1935	154.39			91.3792	220.8	98.1482	209.089	70.6667	399.892	79.1044	895.872	55.2083	208.21				5.83	96.3636	397.39	82.8125	1685.95			71.6216	906.25	69.7368	1548.35	84.127	1264.33	84.127	1480.4					88.3333	388.91					100	366.88			98.1481
29.6575	77.1427	1117.32	34.8387	167.49			93.1033	213.92	100	205.506	72	422.78	80.5969	795.283	56.2499	213.14				5.94	98.1818	359.62	84.375	1726.77			72.973	1062.84	71.0526	1779.31	85.7143	1029.41	85.7143	1417.67					90	337.82									100
30.2068	78.5715	1187.18	35.4839	150.9			94.8277	212.39			73.3335	460.371	82.0897	726.728	57.2918	216.92				6.05	100	348.89	85.9375	1682.47			74.3243	1340.79	72.3684	1960.82	87.3016	748.25	87.3016	1383.17					91.6667	302.93
30.756	80	1203.95	36.1291	147.15			96.5518	200.41			74.6668	505.365	83.5822	637.439	58.3334	224.07				6.16			87.5	1531.77			75.6757	1634.17	73.6842	2073.78	88.8889	606.63	88.8889	1196.86					93.3333	281.16
31.3052	81.4285	1158.84	36.7742	152.94			98.2759	196.08			76.0001	537.707	85.0747	569.359	59.3751	241.78				6.27			89.0625	1299.33			77.027	1788.71	75	2011.93	90.4762	484.64	90.4762	1037.92					95	256.47
31.8544	82.8571	1024.76	37.4194	157.57			100	192.28			77.3334	526.403	86.5672	497.09	60.4167	255.35				6.38			90.625	1152.55			78.3784	1845.83	76.3158	1727.32	92.0635	397.62	92.0635	816.82					96.6667	245.98
32.4036	84.2856	918.31	38.0645	161.95							78.6667	534.52	88.0597	452.395	61.4583	277.04				6.49			92.1875	974.34			79.7297	1758.72	77.6316	1376.72	93.6508	337.25	93.6508	643.83					98.3333	238.5
32.9528	85.7141	792.02	38.7097	167.44							80	533.398	89.5522	428.287	62.5	313.58				6.6			93.75	835.8			81.0811	1613.98	78.9474	1097.29	95.2381	331.65	95.2381	496.22					100	220.35
33.502	87.1427	701.81	39.3548	164.79							81.3333	525.136	91.0447	420.198	63.5416	341.99				6.71			95.3125	693.92			82.4324	1443.16	80.2632	877.56	96.8254	314.95	96.8254	410.67
34.0513	88.5715	587.01	40.0001	161.11							82.6668	522.725	92.5375	416.603	64.5834	384.05				6.82			96.875	609.54			83.7838	1222.14	81.5789	735.96	98.4127	314.35	98.4127	365.01
34.6005	90	495.68	40.6452	164.43							84.0001	512.921	94.03	406.581	65.6251	448.52				6.93			98.4375	539.87			85.1351	1078.71	82.8947	618.81	100	331.4	100	317.36
35.1497	91.4285	401.32	41.2904	166.59							85.3334	493.219	95.5225	377.991	66.6667	529.39				7.04			100	502.8			86.4865	902.57	84.2105	529.79
35.6989	92.8571	330.91	41.9355	164.88							86.6667	480.782	97.015	349.292	67.7084	661.2				7.15							87.8378	773.52	85.5263	487.89
36.2481	94.2856	278.43	42.5807	160.15							88	431.825	98.5075	320.036	68.75	762.88				7.26							89.1892	672	86.8421	434.69
36.7973	95.7141	254.42	43.2258	161.09							89.3333	445.884	100	287.543	69.7917	921.74				7.37							90.5405	615.93	88.1579	423.92
37.3465	97.1427	227.22	43.8709	161.5							90.6667	418.573			70.8333	1118.28				7.48							91.8919	548.1	89.4737	394.4
37.8957	98.5712	210.65	44.5161	161.22							92	369.965			71.8749	1379.78				7.59							93.2432	524.06	90.7895	370.51
38.445	100	206.04	45.1614	165.79							93.3335	347.086			72.9168	1541.66				7.7							94.5946	498.64	92.1053	362.41
38.9942			45.8065	164.58							94.6668	341.927			73.9584	1730.54				7.81							95.9459	439.89	93.4211	332.94
39.5434			46.4516	165.66							96.0001	318.328			75	1763.45				7.92							97.2973	411.68	94.7368	343.34
40.0926			47.0968	165.12							97.3334	283.579			76.0417	1742.74				8.03							98.6486	380.93	96.0526	332.93
40.6418			47.7419	163.82							98.6667	261.367			77.0833	1662.81				8.14							100	359.13	97.3684	303.63
41.191			48.3871	162.8							100	260.262			78.125	1621.31				8.25									98.6842	284.12
41.7402			49.0322	170.55											79.1666	1425.15				8.36									100	285.48
42.2895			49.6775	185.4											80.2084	1314.54
42.8387			50.3226	173.59											81.2501	1179.58
43.3879			50.9678	179.05											82.2917	1089.47
43.9371			51.6129	176.14											83.3334	947.56
44.4863			52.2581	178.49											84.375	802.81
45.0355			52.9032	181.86											85.4166	739.56
45.5847			53.5484	178.24											86.4583	717.49
46.134			54.1936	181.91											87.5001	615.84
46.6832			54.8388	187.75											88.5418	524.31
47.2324			55.4839	194.93											89.5834	418.59
47.7816			56.1291	197.78											90.625	353.84
48.3308			56.7742	194.15											91.6667	369.66
48.88			57.4193	199.21											92.7083	383.82
49.4292			58.0645	202.13											93.75	407.27
49.9785			58.7098	205.82											94.7918	410.18
50.5277			59.3549	209.84											95.8334	360.24
51.0769			60	208.54											96.8751	311.26
51.6261			60.6452	221.09											97.9167	285.52
52.1753			61.2903	236.49											98.9584	285.06
52.7245			61.9355	225.18											100	260.52
53.2737			62.5806	233.29
53.8229			63.2258	249.94
54.3722			63.871	260.11
54.9214			64.5162	265.94
55.4706			65.1613	281.17
56.0198			65.8065	308.33
56.569			66.4516	318.08
57.1182			67.0968	323.65
57.6674			67.7419	346.42
58.2167			68.3872	384.35
58.7659			69.0323	431.27
59.3151			69.6775	442.67
59.8643			70.3226	474.08
60.4135			70.9678	528.27
60.9627			71.6129	557.01
61.5119			72.258	644.05
62.0612			72.9033	746.63
62.6104			73.5485	920.01
63.1596			74.1936	1092.73
63.7088			74.8387	1223.7
64.258			75.4839	1351.31
64.8072			76.129	1440.08
65.3564			76.7742	1443.77
65.9056			77.4193	1408.04
66.4549			78.0646	1381.85
67.0041			78.7097	1368.73
67.5533			79.3549	1284.21
68.1025			80	1170.46
68.6517			80.6452	1117.38
69.2009			81.2903	970.65
69.7501			81.9355	849.09
70.2994			82.5807	686.26
70.8486			83.2259	548.78
71.3978			83.871	473.55
71.947			84.5162	429.48
72.4962			85.1613	373.15
73.0454			85.8064	317.1
73.5946			86.4516	303.1
74.1439			87.0969	304.2
74.6931			87.742	271.65
75.2423			88.3871	251.43
75.7915			89.0323	231.69
76.3407			89.6774	223.1
76.8899			90.3226	217.23
77.4391			90.9677	216.08
77.9883			91.6129	207.07
78.5376			92.2581	199.65
79.0868			92.9033	208.08
79.636			93.5484	203.32
80.1852			94.1936	194
80.7344			94.8387	180.62
81.2836			95.4839	183.88
81.8328			96.129	181.78
82.3821			96.7743	178.38
82.9313			97.4194	179.54
83.4805			98.0646	184.49
84.0297			98.7097	181.27
84.5789			99.3549	187.34
85.1281			100	180.19
	0		0		0		0		0		0		0		0		0				0		0		0		0		0		0		0		0		0		0		0		0		0		0		0
	5	166.767	5	149.381	5	221.396	5	168.72	5	177.57	5	165.279	5	164.011	5	157.748	5	214.66			5	247.243	5	261.74	5	365.355	5	360.79	5	267.31	5	185.522	5	169.795	5	255.444	5	210	5	179.74	5	224	5	173.028	5	193.592	5	217.59	5
	10	170.608	10	151.445	10	240.648	10	168.923	10	176.899	10	164.908	10	171.393	10	163.986	10	219.753			10	238.827	10	267.39	10	432.87	10	400.975	10	260.512	10	174.39	10	174.433	10	259.861	10	243	10	192.1	10	224.011	10	175.749	10	198.142	10	229.673	10
	15	173.718	15	150.124	15	287.789	15	181.387	15	182.682	15	162.722	15	187.992	15	161.882	15	234.87			15	230.707	15	272.897	15	423.795	15	431.248	15	240.415	15	182.363	15	179.253	15	224.945	15	239.333	15	200.58	15	224.912	15	174.833	15	216.079	15	215.523	15
	20	180.403	20	149.641	20	302.179	20	198.753	20	196.745	20	168.511	20	188.082	20	162.926	20	220.18			20	228.703	20	257.603	20	455.48	20	473.653	20	258.845	20	192.267	20	183.333	20	213.639	20	235	20	199.225	20	229.358	20	176.667	20	227.706	20	219.413	20
	25	176.907	25	151.086	25	295.286	25	209.407	25	195.643	25	168.865	25	189.343	25	159.696	25	229.005			25	227.85	25	259	25	504.76	25	494.18	25	281.407	25	197.7	25	185.883	25	224.055	25	222	25	199.195	25	237.331	25	179.093	25	258.908	25	229.043	25
	30	178.99	30	150.021	30	268.128	30	215.257	30	188.114	30	170.398	30	184.295	30	164.775	30	236.977			30	244.29	30	281.132	30	539.89	30	522.58	30	271.1	30	194.143	30	184.07	30	228.44	30	217.667	30	213.535	30	231.765	30	184.218	30	262.106	30	233.067	30
	35	178.168	35	153.509	35	250.592	35	221.613	35	189.839	35	175.151	35	192.282	35	176.57	35	247.2			35	247.783	35	293.54	35	541.925	35	551.093	35	256.567	35	200.188	35	194.942	35	230.273	35	244	35	214.08	35	230.899	35	188.512	35	243.868	35	230.97	35
	40	176.317	40	157.534	40	253.95	40	239.247	40	195.695	40	180.097	40	200.012	40	178.794	40	254.86			40	258.423	40	289.643	40	630.4	40	537.635	40	273.817	40	212.017	40	218.59	40	237.967	40	254.333	40	210.25	40	244.342	40	233.472	40	259.861	40	254.407	40
	45	179.075	45	162.621	45	266.137	45	310.607	45	219.583	45	182.551	45	201.49	45	189.746	45	268.53			45	281.627	45	301.307	45	799.465	45	504.702	45	281.845	45	224.623	45	207.09	45	264.897	45	250.757	45	212.99	45	247.343	45	249.783	45	288.07	45	268.89	45
	50	195.382	50	167.965	50	301.76	50	463.673	50	221.733	50	181.678	50	219.893	50	207.045	50	298.35			50	337.147	50	314.215	50	1074.08	50	504	50	315.015	50	263.98	50	200.887	50	256.291	50	262.918	50	226.715	50	272.986	50	241.336	50	345.684	50	281.28	50
	55	205.6	55	179.629	55	379.614	55	576.063	55	222.827	55	181.704	55	259.005	55	200.806	55	383.267			55	338.727	55	325.233	55	1340.05	55	491.683	55	368.85	55	330.237	55	222.473	55	281.129	55	281.584	55	243.203	55	291.102	55	240.119	55	525.26	55	301.703	55
	60	217.218	60	200.551	60	465.288	60	1042.29	60	249.315	60	225.384	60	309.815	60	220.824	60	510.365			60	402.973	60	345.22	60	1543.7	60	486.348	60	539.957	60	513.573	60	231.907	60	333.752	60	305.008	60	252.24	60	370.68	60	287.638	60	705.098	60	401.227	60
	65	290.712	65	237.572	65	485.012	65	2117.19	65	349.256	65	280.834	65	381.166	65	314.402	65	668.237			65	491.343	65	406.76	65	1700.94	65	509.697	65	838.895	65	1147.74	65	253.96	65	444.581	65	369.751	65	298.577	65	567.642	65	334.264	65	877.786	65	536.707	65
	70	529.768	70	354.493	70	613.212	70	2492.74	70	585.428	70	324.841	70	565.242	70	664.746	70	1110.79			70	752.42	70	591.197	70	1728.78	70	587.457	70	1290.48	70	2365.56	70	326.057	70	615.363	70	595.362	70	397.38	70	855.464	70	436.852	70	1056.01	70	894.343	70
	75	801.095	75	773.31	75	875.358	75	1632.14	75	859.604	75	447.102	75	974.838	75	1442.57	75	2376.18			75	1307.73	75	1135.56	75	1459.8	75	1018.93	75	1956.46	75	2625.58	75	445.243	75	911.261	75	1024.99	75	823.678	75	1025.03	75	545.816	75	898.447	75	1114.77	75
	80	1132.98	80	1382.57	80	1071.12	80	626.217	80	840.341	80	533.007	80	968.121	80	1643.09	80	3071.59			80	1627.79	80	1598	80	1024.75	80	1756.86	80	1553.32	80	2362.27	80	759.91	80	1073.63	80	1088.83	80	1516.65	80	1006.43	80	723.057	80	665.801	80	1145.04	80
	85	1076.47	85	780.706	85	954.279	85	372.23	85	546.846	85	523.545	85	719.817	85	1066.79	85	1842.25			85	1347.55	85	1702.67	85	707.38	85	1426.43	85	690.53	85	1585.31	85	1324.86	85	1162.02	85	960.479	85	1098.26	85	1021.48	85	839.952	85	518.717	85	827.417	85
	90	644.13	90	284.427	90	718.582	90	264.483	90	312.436	90	462.928	90	486.783	90	603.158	90	832.665			90	788.013	90	1504.52	90	513.72	90	856.7	90	435.225	90	794.763	90	1332.57	90	798.982	90	780.314	90	479.585	90	919.925	90	793.144	90	447.672	90	480.56	90
	95	376.585	95	203.256	95	520.402	95	215.703	95	222.233	95	369.388	95	414.461	95	384.954	95	510.953			95	505.68	95	987.563	95	414.51	95	546.683	95	352.3	95	406.503	95	832.857	95	467.726	95	536.668	95	294.595	95	818.891	95	527.007	95	398.661	95	384.737	95
	100	224.582	100	182.109	100	337.52	100	196.257	100	207.815	100	280.884	100	333.716	100	300.52	100	364.593			100	368.633	100	586.533	100	349.375	100	397.908	100	301.54	100	323.087	100	397.315	100	362.307	100	328.052	100	240.325	100	582.781	100	316.862	100	367.612	100	331.653	100
[truncated: 7 more columns]

## Sheet: IF Binned
9	7	FISH	9		12		13		15		17		18		21		26		1		23		32		33		37			4		5		6		10		21		26		29	5		6		10		18
X	X	Y	X	Y	X	Y	X	Y	X	Y	X	Y	X	Y	X	Y	X	Y	X	Y	X	Y	X	Y	X	Y	X	Y	X	Y	X	Y	X	Y	X	Y	X	Y	X	Y	X	Y	X	Y	X	Y	X	Y	X
0	0	13984	0	6704	0	6608	0	8400	0	10048	0	17360	0	6976	0	9616	0	12816	0	14160	0	16144	0	26832	0	24832	0	28416	0	15584	0	6880	0	20208	0	37776	0	20224	0	14000	0	18000	0	6864	0	18800	0	11168	0
0.11	1.47059	11462	0.621118	6218.73	2.04082	6394.27	2.17391	7928.2	2.27273	10749.4	2.17391	17015.9	1.78571	7303.57	1.25	9397.26	2.27273	12322.2	2.17391	14701.8	2.17391	15930.1	3.84615	26294.8	1.47059	25111.6	2.94118	29345.2	1.69492	15581.4	1.69492	7863.48	2.77778	20973.4	2.5	38079.8	1.78571	18976	2.5	14530.1	2.85714	18299	3.22581	6786.9	2.7027	20432.8	2.08333	12367.6	2.43902
0.22	2.94118	10208.5	1.24224	5790.96	4.08163	6683.9	4.34783	7386.83	4.54545	11003.4	4.34783	16060	3.57143	7656.79	2.5	8948.87	4.54545	11050.4	4.34783	13885.8	4.34783	14248.4	7.69231	23922.6	2.94118	22390.2	5.88235	29419.2	3.38983	15281.9	3.38983	7777.21	5.55556	19412.8	5	37211.8	3.57143	17024	5	15376.2	5.71429	15931.1	6.45161	6545.91	5.40541	20203.6	4.16667	13671.3	4.87805
0.33	4.41176	8160.72	1.86335	5676.81	6.12245	5893.68	6.52174	6360.18	6.81818	10633.5	6.52174	14538.5	5.35714	7352.27	3.75	8161.25	6.81818	9811.17	6.52174	12743.5	6.52174	12839.4	11.5385	22274.3	4.41176	19097.2	8.82353	28202.5	5.08475	13493.4	5.08475	7279.11	8.33333	16255	7.5	33628.8	5.35714	13248	7.5	13867.9	8.57143	12829.3	9.67742	6422.15	8.10811	17411.2	6.25	13955	7.31707
0.44	5.88235	7333.28	2.48447	5631.72	8.16327	5331.24	8.69565	5852.74	9.09091	10315.6	8.69565	13048.6	7.14286	6885.58	5	7347.25	9.09091	8914.14	8.69565	11794.1	8.69565	11199.6	15.3846	21901.2	5.88235	15448.1	11.7647	26095.4	6.77966	11305.8	6.77966	6824.13	11.1111	13090.1	10	31163.2	7.14286	12160	10	11876.7	11.4286	11191.9	12.9032	6472.06	10.8108	14892.6	8.33333	13214.9	9.7561
0.55	7.35294	7834.03	3.10559	5566.93	10.2041	5013.02	10.8696	5159.24	11.3636	9903.31	10.8696	11165.3	8.92857	6168.58	6.25	6881.08	11.3636	7764.93	10.8696	10465.6	10.8696	9754.22	19.2308	20956.8	7.35294	12803.9	14.7059	25141	8.47458	10187.1	8.47458	5944.5	13.8889	10895.4	12.5	28001.2	8.92857	11136	12.5	10143	14.2857	10775.5	16.129	6328.82	13.5135	11830.2	10.4167	12096.6	12.1951
0.66	8.82353	7284.33	3.72671	5241.25	12.2449	4754.97	13.0435	4751.38	13.6364	8985.58	13.0435	9509.67	10.7143	5443.89	7.5	6288.77	13.6364	7044.55	13.0435	9179.8	13.0435	9158.62	23.0769	19788.8	8.82353	11089.3	17.6471	24994.5	10.1695	9553.01	10.1695	5131.56	16.6667	9962.51	15	24086	10.7143	11760	15	9712.64	17.1429	10358	19.3548	6304.36	16.2162	9775.67	12.5	10376.6	14.6341
0.77	10.2941	7283.61	4.34783	5137.55	14.2857	4679.48	15.2174	4524.74	15.9091	8296.34	15.2174	8617.11	12.5	5062.17	8.75	5539.31	15.9091	6918.88	15.2174	8754.67	15.2174	8224.38	26.9231	18352.5	10.2941	10610.3	20.5882	25501.1	11.8644	8862.76	11.8644	4548.57	19.4444	9722.35	17.5	21808.2	12.5	10000	17.5	9279.43	20	10845.8	22.5806	5768.15	18.9189	9450.54	14.5833	9197.46	17.0732
0.88	11.7647	7247.36	4.96894	4822.65	16.3265	4727.86	17.3913	4625.43	18.1818	7518.6	17.3913	8223.34	14.2857	4679.3	10	5231.5	18.1818	6603.77	17.3913	8417.48	17.3913	7832.66	30.7692	17864.5	11.7647	9985.56	23.5294	26640.8	13.5593	8915.74	13.5593	4306.04	22.2222	9237.42	20	19675.5	14.2857	9024	20	8267.86	22.8571	9854.99	25.8065	5479.19	21.6216	9509.71	16.6667	8808.18	19.5122
0.99	13.2353	7398.73	5.59006	4838.69	18.3673	4420.07	19.5652	4623.14	20.4545	6425.33	19.5652	7849.51	16.0714	4700.99	11.25	4959.93	20.4545	6449.91	19.5652	7053.9	19.5652	7478.57	34.6154	17326.5	13.2353	9449.68	26.4706	26746.9	15.2542	9124.14	15.2542	4459.13	25	9653.62	22.5	18662	16.0714	8016	22.5	8623.4	25.7143	9056.55	29.0323	5296.86	24.3243	9369.92	18.75	8934.61	21.9512
1.1	14.7059	7089.77	6.21118	4760.38	20.4082	4330.1	21.7391	4601.75	22.7273	5796.9	21.7391	7763.61	17.8571	4814.72	12.5	4712.46	22.7273	6744.59	21.7391	6654.25	21.7391	7549.23	38.4615	17901.9	14.7059	9533.55	29.4118	27310.8	16.9492	9752.56	16.9492	4479.93	27.7778	9849.01	25	18281.6	17.8571	8096	25	8396.95	28.5714	8906.58	32.2581	5369.37	27.027	9577.41	20.8333	8354.01	24.3902
1.21	16.1765	6709.68	6.8323	4788.73	22.449	4420.69	23.913	4611.39	25	5640.09	23.913	7817.64	19.6429	4642.39	13.75	4516.4	25	6567.13	23.913	6808.68	23.913	7994.92	42.3077	18670.4	16.1765	9295.66	32.3529	30183.7	18.6441	10014.9	18.6441	4421.55	30.5556	10268.3	27.5	18565	19.6429	8032	27.5	8399.96	31.4286	8609.24	35.4839	5372.47	29.7297	10126.6	22.9167	7273.94	26.8293
1.32	17.6471	6291.49	7.45342	4823.69	24.4898	4374.73	26.087	4516.64	27.2727	5826.55	26.087	7787.43	21.4286	5096.82	15	4663.5	27.2727	6888.76	26.087	7032.39	26.087	7508.04	46.1538	19040.7	17.6471	9169.2	35.2941	33063.5	20.339	10018.3	20.339	4406.92	33.3333	9908.9	30	21258	21.4286	7120	30	8330.13	34.2857	9110	38.7097	5234.63	32.4324	10493.7	25	6702.1	29.2683
1.43	19.1176	6033.37	8.07453	4881.29	26.5306	4383.83	28.2609	4367.95	29.5455	5713.38	28.2609	7664.63	23.2143	4821.18	16.25	4320.88	29.5455	6722	28.2609	7432.17	28.2609	7404.77	50	19342.5	19.1176	8346.9	38.2353	36085.6	22.0339	9723.18	22.0339	4474.33	36.1111	9658.11	32.5	22483.3	23.2143	6944	32.5	9546.65	37.1429	9261.21	41.9355	5491.61	35.1351	9990.42	27.0833	7010.58	31.7073
1.54	20.5882	6078.36	8.69565	4573.59	28.5714	4532.46	30.4348	4671.79	31.8182	5804.71	30.4348	7465.31	25	4881.94	17.5	4075.27	31.8182	6604.1	30.4348	7965.12	30.4348	7674.54	53.8462	20265.8	20.5882	8201.44	41.1765	36072	23.7288	9280.74	23.7288	4321.16	38.8889	9419.79	35	21044.9	25	7374.19	35	8679.36	40	10039.1	45.1613	5584.02	37.8378	9835.07	29.1667	7433.2	34.1463
1.65	22.0588	6138.56	9.31677	4262.98	30.6122	4327	32.6087	4654.55	34.0909	5613.98	32.6087	7450.79	26.7857	4805.64	18.75	4134.82	34.0909	7047.45	32.6087	8406.42	32.6087	8245.8	57.6923	21075.9	22.0588	8802.64	44.1176	35405.8	25.4237	8701.97	25.4237	4113.86	41.6667	9268.89	37.5	20648.5	26.7857	8246.48	37.5	8247.81	42.8571	9046.94	48.3871	5580.07	40.5405	9339.34	31.25	8104.11	36.5854
1.76	23.5294	6158.1	9.93789	4061.76	32.6531	4387.11	34.7826	4533.35	36.3636	5708.64	34.7826	7108.61	28.5714	4520.51	20	4063.83	36.3636	7142.58	34.7826	8771.13	34.7826	8890.74	61.5385	21797.3	23.5294	8245.92	47.0588	34541.3	27.1186	7420.42	27.1186	4139.85	44.4444	9976.49	40	22752.6	28.5714	8564.42	40	7564.42	45.7143	8328.96	51.6129	5513.66	43.2432	9285.01	33.3333	8318.77	39.0244
1.87	25	6590.87	10.559	3972.59	34.6939	4411.73	36.9565	4815.65	38.6364	5907.94	36.9565	6667.56	30.3571	4637.09	21.25	3832.94	38.6364	6888.8	36.9565	8777.35	36.9565	8701.72	65.3846	23414.8	25	8144.74	50	35628.7	28.8136	7127.98	28.8136	4300.98	47.2222	10276.4	42.5	26900.7	30.3571	7918.51	42.5	7141.47	48.5714	7649.28	54.8387	5697.75	45.9459	9378.05	35.4167	8167.49	41.4634
1.98	26.4706	7039.82	11.1801	3943.94	36.7347	4662.59	39.1304	4884	40.9091	6182.2	39.1304	5910.71	32.1429	4657.4	22.5	3669.54	40.9091	7114.83	39.1304	9345.88	39.1304	8882.4	69.2308	27532.7	26.4706	8020.26	52.9412	37767	30.5085	6521.99	30.5085	4607.25	50	11836.5	45	32679.6	32.1429	8532.94	45	7249.29	51.4286	7239.04	58.0645	6076.67	48.6486	10582.8	37.5	8411.47	43.9024
2.09	27.9412	7307.38	11.8012	3883.64	38.7755	4538.32	41.3043	5251.67	43.1818	5868.26	41.3043	5895.18	33.9286	4465.93	23.75	3790.59	43.1818	7137.31	41.3043	9779.92	41.3043	8204.2	73.0769	28596.3	27.9412	7961.45	55.8824	39901.5	32.2034	6552.14	32.2034	4144.63	52.7778	12521.2	47.5	33845.9	33.9286	9280.78	47.5	7730.54	54.2857	7787.52	61.2903	6484.53	51.3514	12146.6	39.5833	8765.88	46.3415
2.2	29.4118	7309.51	12.4224	3900.88	40.8163	4292.26	43.4783	4953.01	45.4545	6244.94	43.4783	6001.03	35.7143	4588.65	25	3780.26	45.4545	6786.44	43.4783	9792.41	43.4783	8002.21	76.9231	26609.7	29.4118	8256.79	58.8235	39738.9	33.8983	6804.69	33.8983	3928.46	55.5556	11808.3	50	31311.6	35.7143	10535	50	7746.96	57.1429	8806.4	64.5161	6673.14	54.0541	12291.5	41.6667	9591.69	48.7805
2.31	30.8824	7191.71	13.0435	3839.46	42.8571	4448.98	45.6522	5066.46	47.7273	6268.88	45.6522	5808.11	37.5	4278.4	26.25	3624.13	47.7273	6849.38	45.6522	9448.17	45.6522	7843.73	80.7692	23153.3	30.8824	8287.2	61.7647	34750	35.5932	6758.59	35.5932	3962.65	58.3333	10964.7	52.5	28605.7	37.5	11208.3	52.5	8217.03	60	9488	67.7419	7340.65	56.7568	11168.5	43.75	9920.39	51.2195
2.42	32.3529	7046.72	13.6646	3733.23	44.898	4375.83	47.8261	5085.25	50	6972.66	47.8261	5787.51	39.2857	4475.84	27.5	3545.93	50	7128.26	47.8261	9181.08	47.8261	7738.82	84.6154	19848	32.3529	9513.79	64.7059	31665	37.2881	6675.04	37.2881	4241.97	61.1111	9745.28	55	23860.3	39.2857	10749	55	8463.83	62.8571	10086.9	70.9677	6677.37	59.4595	10163.5	45.8333	9770.32	53.6585
2.53	33.8235	6746.23	14.2857	3889.87	46.9388	4407.66	50	5212.77	52.2727	7448.2	50	5778.22	41.0714	4088	28.75	3682.03	52.2727	7188.13	50	9050.25	50	8000.29	88.4615	17753.2	33.8235	8441.91	67.6471	31841.4	38.9831	6977.8	38.9831	4266.03	63.8889	8926.55	57.5	20365.6	41.0714	9774.58	57.5	8113.14	65.7143	10141.4	74.1935	6526.97	62.1622	9015.73	47.9167	9516.73	56.0976
2.64	35.2941	6363.15	14.9068	4131.58	48.9796	4438.77	52.1739	5161.75	54.5455	7051.27	52.1739	5564.09	42.8571	3891.84	30	3600.5	54.5455	6975.33	52.1739	8520.49	52.1739	7959.09	92.3077	16541	35.2941	9070.08	70.5882	37319.5	40.678	7247.6	40.678	4331.56	66.6667	8216.49	60	18906.7	42.8571	9246.79	60	7367.02	68.5714	9714.63	77.4194	6193.6	64.8649	8522.91	50	9131.74	58.5366
2.75	36.7647	6058.76	15.528	3709.14	51.0204	4593.6	54.3478	4862.3	56.8182	6995.23	54.3478	5593.46	44.6429	4076.16	31.25	3662.92	56.8182	6630.23	54.3478	7923.34	54.3478	8207.96	96.1538	15707.4	36.7647	8948.32	73.5294	42344.4	42.3729	6933.06	42.3729	4814.63	69.4444	8170.4	62.5	19911.9	44.6429	9293.62	62.5	6888.69	71.4286	9390.36	80.6452	5872	67.5676	7996.31	52.0833	8703.06	60.9756
2.86	38.2353	5672.39	16.1491	3682.4	53.0612	4692.61	56.5217	4886.61	59.0909	7143.93	56.5217	5683.98	46.4286	3954.56	32.5	3592.7	59.0909	6165.17	56.5217	7539.98	56.5217	8381.24	100	15661.7	38.2353	8365.2	76.4706	41920.4	44.0678	7346.64	44.0678	5388.96	72.2222	8651.02	65	21487.5	46.4286	9197.8	65	6886.54	74.2857	9321.01	83.871	5217.6	70.2703	8194.37	54.1667	8521.31	63.4146
2.97	39.7059	5549.11	16.7702	3811.76	55.102	4786.25	58.6957	5136.81	61.3636	7602.38	58.6957	5652.81	48.2143	3763.84	33.75	3665.71	61.3636	5770.13	58.6957	7175.81	58.6957	8321.28			39.7059	8469.13	79.4118	40054.7	45.7627	7323.05	45.7627	5419.08	75	9580.76	67.5	24069.9	48.2143	8988.37	67.5	6750.65	77.1429	9569.62	87.0968	5123.2	72.973	8983.09	56.25	7872.17	65.8537
3.08	41.1765	5538.8	17.3913	3805.67	57.1429	4611.35	60.8696	5695.88	63.6364	7170.63	60.8696	5684.82	50	3665.92	35	3755.35	63.6364	5308.21	60.8696	7233.87	60.8696	8170.27			41.1765	8210.75	82.3529	35270.2	47.4576	6991.72	47.4576	5174.5	77.7778	12141.8	70	25063.2	50	8429.04	70	6600.64	80	10319.1	90.3226	5165.6	75.6757	10697.8	58.3333	6816.48	68.2927
3.19	42.6471	5475.35	18.0124	3729.51	59.1837	4467.12	63.0435	6226.32	65.9091	6654	63.0435	5932.88	51.7857	3773.76	36.25	3612.52	65.9091	5044.66	63.0435	7681.72	63.0435	7953.84			42.6471	7777.53	85.2941	32113.3	49.1525	6756.58	49.1525	4837.24	80.5556	14533.6	72.5	23344.8	51.7857	7547.84	72.5	6733.26	82.8571	11090.3	93.5484	5320	78.3784	13041.7	60.4167	6833.41	70.7317
3.3	44.1176	5384.57	18.6335	3768.51	61.2245	4386.5	65.2174	6343.15	68.1818	6140.29	65.2174	6414.45	53.5714	4073.92	37.5	3539.61	68.1818	5111.18	65.2174	8394.34	65.2174	7786.57			44.1176	7366.65	88.2353	31101	50.8475	6385.04	50.8475	4947.92	83.3333	15073.9	75	20728	53.5714	6603.71	75	6534.47	85.7143	11189.7	96.7742	5480	81.0811	14359	62.5	7105.12	73.1707
3.41	45.5882	5336.38	19.2547	3825.54	63.2653	4484.89	67.3913	6479.39	70.4545	5910.89	67.3913	6971.28	55.3571	4095.68	38.75	3505.63	70.4545	5512.32	67.3913	8976.26	67.3913	7510.33			45.5882	7025.32	91.1765	29807.1	52.5424	6152.3	52.5424	4701.17	86.1111	13245.5	77.5	19497.6	55.3571	6251.74	77.5	6806.18	88.5714	10374.5	100	5108	83.7838	13050.5	64.5833	7857.81	75.6098
3.52	47.0588	5781.8	19.8758	3753.81	65.3061	4316.48	69.5652	6360.93	72.7273	5700.58	69.5652	7361.25	57.1429	4001.92	40	3574.15	72.7273	6292.48	69.5652	9737.12	69.5652	7968.56			47.0588	6851.9	94.1176	28225.5	54.2373	5969.8	54.2373	4777.44	88.8889	11130.9	80	19435.2	57.1429	6214.67	80	7536.39	91.4286	9317.2			86.4865	10973.1	66.6667	8468.35	78.0488
3.63	48.5294	6052.07	20.4969	3659.88	67.3469	4304.16	71.7391	5410.31	75	6002.59	71.7391	7392.92	58.9286	4501.76	41.25	3465	75	6916.76	71.7391	9596.74	71.7391	8835.93			48.5294	7217.96	97.0588	25866.3	55.9322	5979.69	55.9322	4893.82	91.6667	9713.9	82.5	18724.8	58.9286	6227.86	82.5	7823.71	94.2857	7817.55			89.1892	10190.5	68.75	9143.64	80.4878
3.74	50	5897.34	21.118	3644.02	69.3878	4631.01	73.913	5104.6	77.2727	6265.28	73.913	7334.75	60.7143	4245.44	42.5	3261.55	77.2727	7335.71	73.913	9431.98	73.913	9913.95			50	7403.92	100	23004.9	57.6271	5938.72	57.6271	4871.1	94.4444	9858.02	85	17021.6	60.7143	6462.44	85	7310.53	97.1429	6560.31			91.8919	9929.35	70.8333	9489.2	82.9268
3.85	51.4706	5944.91	21.7391	3611.69	71.4286	4957.58	76.087	5028.34	79.5455	6931.4	76.087	7540.55	62.5	4318.4	43.75	3386.5	79.5455	6367.56	76.087	9606.05	76.087	10467.4			51.4706	7589			59.322	6085.73	59.322	5210.55	97.2222	10512.4	87.5	15727.2	62.5	7805.43	87.5	7284.27	100	5842.01			94.5946	10501.3	72.9167	9099.18	85.3659
3.96	52.9412	5690.63	22.3602	3704.48	73.4694	5373.01	78.2609	4966.74	81.8182	7434.7	78.2609	7538.67	64.2857	3896.64	45	3638.35	81.8182	5542.87	78.2609	10187.8	78.2609	11197.7			52.9412	7629.16			61.0169	6272.3	61.0169	5351.12	100	9592.3	90	15548	64.2857	9538.55	90	6736.36					97.2973	10062.5	75	8670.64	87.8049
4.07	54.4118	5264.57	22.9814	3881.68	75.5102	5773.62	80.4348	4888.4	84.0909	7975.59	80.4348	7417.29	66.0714	3903.68	46.25	3661.2	84.0909	5046.92	80.4348	9736.39	80.4348	11173.7			54.4118	7446.38			62.7119	6527.38	62.7119	5146.24			92.5	16316.8	66.0714	10874	92.5	7215.73					100	8879.63	77.0833	9154.91	90.2439
4.18	55.8824	4960.12	23.6025	3889.33	77.551	5309.61	82.6087	5085.79	86.3636	7568.64	82.6087	7819.1	67.8571	3872.64	47.5	3642.16	86.3636	4799.01	82.6087	9279.24	82.6087	10499.5			55.8824	6866.31			64.4068	6934.98	64.4068	4744.2			95	16988	67.8571	11035.3	95	7992.32							79.1667	9806.27	92.6829
4.29	57.3529	4863.17	24.2236	3993.65	79.5918	5265.8	84.7826	5064.93	88.6364	7183.73	84.7826	7317.42	69.6429	3668.16	48.75	3789.59	88.6364	4669.88	84.7826	8450.79	84.7826	8947.56			57.3529	6720.83			66.1017	7499.88	66.1017	4703.31			97.5	17076.8	69.6429	10685.7	97.5	8149.44							81.25	9339.76	95.122
4.4	58.8235	5032.72	24.8447	3842.93	81.6327	5028.21	86.9565	4890.98	90.9091	6625.9	86.9565	6214.16	71.4286	4134.4	50	3703.09	90.9091	4681.36	86.9565	7480.85	86.9565	7747.55			58.8235	6683.38			67.7966	8048.94	67.7966	4532.78			100	17391.2	71.4286	10560.8	100	7177.13							83.3333	8648.88	97.561
4.51	60.2941	5574.78	25.4658	4083.49	83.6735	4961.68	89.1304	4547.36	93.1818	6062.31	89.1304	5595.44	73.2143	4818.24	51.25	3585.54	93.1818	4588.64	89.1304	5867.55	89.1304	7634.88			60.2941	6895.09			69.4915	8199.37	69.4915	5378.52					73.2143	12018.9									85.4167	7621.8	100
4.62	61.7647	5439.63	26.087	4261.7	85.7143	5066.62	91.3043	4313.17	95.4545	6449.59	91.3043	5632.72	75	4941.76	52.5	3642.56	95.4545	4346.46	91.3043	5687.76	91.3043	7616.57			61.7647	8021.14			71.1864	8437.82	71.1864	5636.52					75	13593									87.5	6457.54
4.73	63.2353	5037.8	26.7081	3967.8	87.7551	4841.09	93.4783	4757.43	97.7273	6170.09	93.4783	5292.65	76.7857	4442.24	53.75	3589.92	97.7273	4273.75	93.4783	5858.83	93.4783	7419.8			63.2353	8587.14			72.8814	8994.34	72.8814	5887.21					76.7857	13476.6									89.5833	5758.63
4.84	64.7059	5034.82	27.3292	4231.2	89.7959	4748.31	95.6522	4885.34	100	5997.21	95.6522	5221.59	78.5714	4447.68	55	3633.7	100	4118.97	95.6522	6461.75	95.6522	7133.14			64.7059	8527.53			74.5763	8984.02	74.5763	5695.75					78.5714	11699.2									91.6667	5781.53
4.95	66.1765	5188.99	27.9503	4111.42	91.8367	4589.61	97.8261	4949.75			97.8261	5177.65	80.3571	4056	56.25	3853.06			97.8261	6929.94	97.8261	7118.23			66.1765	8348.99			76.2712	8754.78	76.2712	6380.47					80.3571	10227.9									93.75	6058.96
5.06	67.6471	5350.3	28.5714	4034.16	93.8776	4426.25	100	4804.81			100	4951.12	82.1429	3640.32	57.5	4036.81			100	6571.88	100	6838.81			67.6471	7838.27			77.9661	8930.55	77.9661	5905.47					82.1429	9991.15									95.8333	6687.74
5.17	69.1176	5628.2	29.1925	3862.43	95.9184	4366.15							83.9286	3757.44	58.75	3963.65									69.1176	7039.02			79.661	8946.33	79.661	6068.72					83.9286	9168.16									97.9167	6880.57
5.28	70.5882	5861.81	29.8137	3990.68	97.9592	4122.12							85.7143	3728.64	60	3660.31									70.5882	7524.38			81.3559	8835.27	81.3559	5893.47					85.7143	8799.04									100	6113.31
5.39	72.0588	6213.52	30.4348	4022.11	100	4279.8							87.5	3916.16	61.25	3609.61									72.0588	8290.75			83.0508	8209.58	83.0508	5746.78					87.5	9020.52
5.5	73.5294	6319.7	31.0559	4398.04									89.2857	3480.96	62.5	3589.62									73.5294	9548.59			84.7458	6856.75	84.7458	5538.23					89.2857	9046.21
5.61	75	6941.97	31.677	4707.26									91.0714	3472	63.75	3715.67									75	9642.05			86.4407	6417.69	86.4407	5696.94					91.0714	8756.08
5.72	76.4706	7902.24	32.2981	4558.31									92.8571	3675.84	65	3494.01									76.4706	10165.6			88.1356	6824.24	88.1356	5526.42					92.8571	7673.45
5.83	77.9412	8703.61	32.9193	4118.87									94.6429	3319.36	66.25	3517.22									77.9412	11515.7			89.8305	6979.45	89.8305	5490.19					94.6429	6673.58
5.94	79.4118	9061.28	33.5404	4009.56									96.4286	3453.12	67.5	3703.02									79.4118	12730.7			91.5254	6968.95	91.5254	5738.4					96.4286	5969.14
6.05	80.8824	8483.2	34.1615	4133.73									98.2143	3377.6	68.75	3287.73									80.8824	12420.4			93.2203	6913.91	93.2203	5958.83					98.2143	4936.18
6.16	82.3529	7342.88	34.7826	4040.18									100	3658.24	70	3362.75									82.3529	12088.2			94.9153	6771.09	94.9153	5803.28					100	5100.7
6.27	83.8235	6040.48	35.4037	4067.68											71.25	3580.14									83.8235	10720.2			96.6102	6541.19	96.6102	5163.97
6.38	85.2941	6091.36	36.0248	3841.03											72.5	3412.33									85.2941	10058.2			98.3051	6201.66	98.3051	4618.53
6.49	86.7647	5962.56	36.646	3839.56											73.75	3384.49									86.7647	9641.36			100	5657.09	100	4503.72
6.6	88.2353	6402.52	37.2671	3949.77											75	3309.23									88.2353	8764.57
6.71	89.7059	6291.53	37.8882	4235.03											76.25	3389.49									89.7059	7793.74
6.82	91.1765	6205.97	38.5093	4379.77											77.5	3452.68									91.1765	7258.57
6.93	92.6471	6459.59	39.1304	4157.42											78.75	3615.75									92.6471	6677.98
7.04	94.1176	6383.08	39.7516	3763.72											80	3879.03									94.1176	6459.72
7.15	95.5882	6179.02	40.3727	3699.64											81.25	4131.32									95.5882	6141.19
7.26	97.0588	5950.23	40.9938	3795.18											82.5	3753.92									97.0588	6108.43
7.37	98.5294	5468.95	41.6149	3776.08											83.75	3706.65									98.5294	6228.34
7.48	100	5739.64	42.236	3965											85	3674.31									100	6550.05
7.59			42.8571	3871.79											86.25	3800.27
7.7			43.4783	3755.52											87.5	3587.83
7.81			44.0994	3842.79											88.75	3580.9
7.92			44.7205	3691.41											90	3513.4
8.03			45.3416	3786.15											91.25	3431.42
8.14			45.9627	3834.08											92.5	3489.46
8.25			46.5839	3722.22											93.75	3236.34
8.36			47.205	3650.62											95	3506.32
8.47			47.8261	3896.53											96.25	3521.82
8.58			48.4472	4131.79											97.5	3297.24
8.69			49.0683	3928.45											98.75	3348.88
8.8			49.6894	4159.32											100	3296.01
8.91			50.3106	4166.8
9.02			50.9317	4171.47
9.13			51.5528	4147.56
9.24			52.1739	4092.78
9.35			52.795	4002.35
9.46			53.4161	3837.99
9.57			54.0373	3780.86
9.68			54.6584	3735.33
9.79			55.2795	3830.12
9.9			55.9006	3925.98
10.01			56.5217	3725.32
10.12			57.1429	3679.63
10.23			57.764	3945.49
10.34			58.3851	3729.92
10.45			59.0062	3880.47
10.56			59.6273	4080.85
10.67			60.2484	4578.62
10.78			60.8696	4864.28
10.89			61.4907	4934.59
11			62.1118	4667.45
11.11			62.7329	4199.39
11.22			63.354	3795.13
11.33			63.9752	3537.13
11.44			64.5963	3559.65
11.55			65.2174	3638.1
11.66			65.8385	3794.23
11.77			66.4596	3699.32
11.88			67.0807	3944.7
11.99			67.7019	3811.2
12.1			68.323	3802.11
12.21			68.9441	3944.77
12.32			69.5652	3867.73
12.43			70.1863	4079.93
12.54			70.8075	4129.35
12.65			71.4286	4257.98
12.76			72.0497	4001.11
12.87			72.6708	3760.94
12.98			73.2919	3662.6
13.09			73.913	3683.89
13.2			74.5342	3751.94
13.31			75.1553	4031.55
13.42			75.7764	4522.25
13.53			76.3975	4433.31
13.64			77.0186	4585.14
13.75			77.6398	4451.45
13.86			78.2609	4384.25
13.97			78.882	4711.64
14.08			79.5031	4423.01
14.19			80.1242	4241.48
14.3			80.7453	4181.72
14.41			81.3665	4430.41
14.52			81.9876	4487.81
14.63			82.6087	4320.43
14.74			83.2298	4033.99
14.85			83.8509	3921.43
14.96			84.472	3616.91
15.07			85.0932	3427.07
15.18			85.7143	3394.34
15.29			86.3354	3395.88
15.4			86.9565	3473.51
15.51			87.5776	3676.87
15.62			88.1988	3884.54
15.73			88.8199	3920.63
15.84			89.441	3880.52
15.95			90.0621	3803.13
16.06			90.6832	3681.33
16.17			91.3043	3839.37
16.28			91.9255	3940.13
16.39			92.5466	3431.62
16.5			93.1677	3291.33
16.61			93.7888	3341.71
16.72			94.4099	3455.07
16.83			95.0311	3378.59
16.94			95.6522	3276.44
17.05			96.2733	3221
17.16			96.8944	3336.65
17.27			97.5155	3377.37
17.38			98.1366	3477.98
17.49			98.7578	3681.84
17.6			99.3789	3595.07
17.71			100	3093.3
	0		0		0		0		0		0		0		0		0		0		0		0		0		0		0		0		0		0		0		0		0		0		0		0		0
	5	10953.8	5	5643.4	5	6562.06	5	7905.01	5	10600.3	5	16811.9	5	7312.12	5	8694.13	5	12062.9	5	14249.2	5	15440.8	5	26563.4	5	22857.8	5	28880.6	5	15482.5	5	7506.9	5	20590.7	5	37689.2	5	18741.3	5	14635.5	5	18149.5	5	6825.45	5	19616.4	5	12402.3	5
	10	7483.88	10	4623.89	10	5612.46	10	6106.46	10	10474.6	10	13793.6	10	6802.14	10	6257.58	10	9362.65	10	12268.8	10	12019.5	10	23922.6	10	13113.8	10	28810.8	10	11662.1	10	6682.58	10	17833.9	10	34001.3	10	12181.3	10	13707	10	14380.2	10	6484.03	10	18807.4	10	13584.9	10
	15	7254.87	15	3911.9	15	4815.82	15	4955.31	15	9444.44	15	10337.5	15	5061.79	15	4816.76	15	7404.74	15	9822.71	15	9456.42	15	22274.3	15	9894.78	15	25618.2	15	9110.5	15	4662.06	15	11992.8	15	27750.1	15	10261.3	15	10577.5	15	10983.7	15	6472.06	15	13361.4	15	10556.9	15
	20	6344.85	20	3760.79	20	4573.97	20	4591.1	20	7907.47	20	8229.99	20	4719.37	20	4251.66	20	6761.33	20	8075.35	20	7845.2	20	21429	20	8937.25	20	24994.5	20	9630.53	20	4453.54	20	9842.43	20	21856.6	20	8048	20	9086.64	20	10601.9	20	6316.59	20	9613.1	20	8871.4	20
	25	6241.47	25	3778.46	25	4375.17	25	4606.57	25	5954.11	25	7790.62	25	4933.31	25	3827.43	25	6587.21	25	6731.47	25	7772.07	25	19788.8	25	8348.68	25	26071	25	9674.07	25	4400.8	25	9445.52	25	18873	25	7146.06	25	8429.4	25	10350.4	25	5768.15	25	9439.81	25	7443.35	25
	30	7061.9	30	4067.86	30	4458.15	30	4442.3	30	5726.67	30	7726.03	30	4736.03	30	3646.57	30	6725.96	30	7232.28	30	7456.41	30	18352.5	30	8095.81	30	27028.8	30	7750.12	30	4184.9	30	9751.32	30	19368.2	30	8061.7	30	8375.68	30	8981.56	30	5388.02	30	9852.02	30	7048.63	30
	35	6994.89	35	4248.51	35	4375.28	35	4619.9	35	5709.34	35	7341.57	35	4586.81	35	3655.44	35	6825.77	35	8380.89	35	8270.36	35	17595.5	35	8747.63	35	30183.7	35	6626.27	35	4226.78	35	10088.6	35	21595.4	35	8577.41	35	8852.05	35	8859.62	35	5369.37	35	10493.7	35	8211.44	35
	40	5910.85	40	4029.25	40	4600.45	40	4849.82	40	5808.29	40	6289.14	40	4447.63	40	3597.45	40	7015.69	40	9061.61	40	8792.06	40	17901.9	40	8713.18	40	34574.6	40	6803.81	40	4156.88	40	9538.95	40	21482	40	10830.8	40	8163.86	40	9650.15	40	5303.55	40	9912.74	40	8448.28	40
	45	5466.24	45	3799.68	45	4372.36	45	5102.34	45	6025.23	45	5948.1	45	4018.67	45	3465.11	45	7126.07	45	9786.17	45	8103.2	45	18670.4	45	7784.98	45	35738.9	45	7175.77	45	4845.05	45	9622.69	45	27444.3	45	9438.33	45	7318.39	45	9543.01	45	5491.61	45	9312.17	45	9756.04	45
	50	5766.9	50	3888.64	50	4423.22	50	5121.49	50	6495.49	50	5791.28	50	3794.77	50	3686.88	50	6921.36	50	9226.5	50	7860.95	50	19191.6	50	7124.77	50	35085	50	7023.78	50	5143.61	50	11056.4	50	32612.4	50	8871.74	50	7575.6	50	7989.12	50	5582.05	50	9980.44	50	9472.93	50
	55	5699.36	55	3991.89	55	4643.1	55	5078.94	55	7157.38	55	5645.26	55	3837.87	55	3630.96	55	7097.24	55	8498.03	55	8055.78	55	19804.2	55	7517.12	55	36697.8	55	6169.05	55	4808.84	55	12178.8	55	27925.9	55	7526.86	55	8142.61	55	7513.28	55	5605.7	55	12219.1	55	8785.37	55
	60	4952	60	3849.72	60	4621.57	60	5011.71	60	7069.58	60	5668.4	60	4199.79	60	3829.51	60	6397.7	60	7357.9	60	8351.26	60	21075.9	60	6756.84	60	39820.2	60	6001.38	60	4991.82	60	11386.5	60	21044.2	60	6231.42	60	7981.33	60	9147.2	60	6076.67	60	10666	60	7344.32	60
	65	5271.76	65	4267.03	65	4435.69	65	5961.1	65	7386.51	65	5808.85	65	4153.49	65	3613.84	65	5539.17	65	7457.8	65	8062.06	65	21797.3	65	8007.73	65	33207.5	65	6578.22	65	5080.52	65	9335.92	65	20102	65	7935.47	65	7047.42	65	9787.47	65	6578.84	65	8769.32	65	7265.45	65
	70	5389.16	70	3812.77	70	4417.22	70	6394.49	70	6397.15	70	6915.66	70	3814.83	70	3472.95	70	5077.92	70	9035.91	70	7755.15	70	25473.7	70	7742.09	70	31841.4	70	7916.06	70	4871.54	70	8193.44	70	23540.2	70	10865	70	6745.94	70	9928.01	70	7340.65	70	7996.31	70	8805.99	70
	75	6334.25	75	3915.97	75	5165.3	75	5257.45	75	5871.35	75	7363.84	75	4631.47	75	3409.79	75	6240.52	75	9514.36	75	9374.94	75	28596.3	75	8751.44	75	39832	75	8805.39	75	5739.83	75	9115.89	75	23045.3	75	12057.6	75	6622.79	75	9355.69	75	6602.17	75	8588.73	75	9086.34	75
	80	8152.27	80	4442.82	80	5449.68	80	4997.54	80	6399.76	80	7539.61	80	4610.56	80	3529.24	80	6873.34	80	9896.92	80	10832.5	80	26609.7	80	11013.5	80	40987.6	80	8877.22	80	6118.22	80	10861.3	80	19886.9	80	12922.9	80	6959.01	80	9944.37	80	6193.6	80	11869.8	80	9210.61	80
	85	7288.85	85	4154.27	85	4994.94	85	5013.04	85	7705.15	85	7517.94	85	3817.92	85	3829.05	85	5294.9	85	9155.47	85	10206.9	85	21500.7	85	11742.9	85	35270.2	85	7967.2	85	5726.16	85	14803.7	85	18393.9	85	9795.72	85	7556.88	85	10704.7	85	5544.8	85	13704.7	85	8994.32	85
	90	6186.99	90	3631.67	90	4885.34	90	4719.17	90	7376.18	90	5904.8	90	3708.59	90	3631.34	90	4734.44	90	6674.2	90	7691.22	90	17753.2	90	9064.46	90	31607.1	90	6740.46	90	5571.18	90	12188.2	90	16098.9	90	8955.26	90	7110.39	90	10782.1	90	5123.2	90	10581.8	90	6612.66	90
	95	6349.55	95	3597.96	95	4507.93	95	4535.3	95	6344.1	95	5462.68	95	3489.07	95	3435.39	95	4635	95	5773.3	95	7518.18	95	16541	95	6798.76	95	29016.3	95	6884.65	95	5833.5	95	9785.96	95	16284.3	95	7701.04	95	7314.8	95	8567.38	95	5242.8	95	10215.3	95	5920.24	95
	100	5834.46	100	3382.03	100	4256.02	100	4879.97	100	6205.63	100	5116.79	100	3496.32	100	3394.05	100	4246.39	100	6654.52	100	7030.06	100	15684.5	100	6257	100	24435.6	100	6133.31	100	4762.07	100	10052.4	100	17152	100	5335.34	100	7772.96	100	6201.16	100	5294	100	9471.07	100	6560.54	100
[truncated: 5 more columns]

## Sheet: IF Normalised
	0		0		0		0		0		0		0		0		0		0		0		0		0		0		0		0		0		0		0		0		0		0		0		0		0
	5	10953.8	5	5643.4	5	6562.06	5	7905.01	5	10600.3	5	16811.9	5	7312.12	5	8694.13	5	12062.9	5	14249.2	5	15440.8	5	26563.4	5	22857.8	5	28880.6	5	15482.5	5	7506.9	5	20590.7	5	37689.2	5	18741.3	5	14635.5	5	18149.5	5	6825.45	5	19616.4	5	12402.3	5
	10	7483.88	10	4623.89	10	5612.46	10	6106.46	10	10474.6	10	13793.6	10	6802.14	10	6257.58	10	9362.65	10	12268.8	10	12019.5	10	23922.6	10	13113.8	10	28810.8	10	11662.1	10	6682.58	10	17833.9	10	34001.3	10	12181.3	10	13707	10	14380.2	10	6484.03	10	18807.4	10	13584.9	10
	15	7254.87	15	3911.9	15	4815.82	15	4955.31	15	9444.44	15	10337.5	15	5061.79	15	4816.76	15	7404.74	15	9822.71	15	9456.42	15	22274.3	15	9894.78	15	25618.2	15	9110.5	15	4662.06	15	11992.8	15	27750.1	15	10261.3	15	10577.5	15	10983.7	15	6472.06	15	13361.4	15	10556.9	15
	20	6344.85	20	3760.79	20	4573.97	20	4591.1	20	7907.47	20	8229.99	20	4719.37	20	4251.66	20	6761.33	20	8075.35	20	7845.2	20	21429	20	8937.25	20	24994.5	20	9630.53	20	4453.54	20	9842.43	20	21856.6	20	8048	20	9086.64	20	10601.9	20	6316.59	20	9613.1	20	8871.4	20
	25	6241.47	25	3778.46	25	4375.17	25	4606.57	25	5954.11	25	7790.62	25	4933.31	25	3827.43	25	6587.21	25	6731.47	25	7772.07	25	19788.8	25	8348.68	25	26071	25	9674.07	25	4400.8	25	9445.52	25	18873	25	7146.06	25	8429.4	25	10350.4	25	5768.15	25	9439.81	25	7443.35	25
	30	7061.9	30	4067.86	30	4458.15	30	4442.3	30	5726.67	30	7726.03	30	4736.03	30	3646.57	30	6725.96	30	7232.28	30	7456.41	30	18352.5	30	8095.81	30	27028.8	30	7750.12	30	4184.9	30	9751.32	30	19368.2	30	8061.7	30	8375.68	30	8981.56	30	5388.02	30	9852.02	30	7048.63	30
	35	6994.89	35	4248.51	35	4375.28	35	4619.9	35	5709.34	35	7341.57	35	4586.81	35	3655.44	35	6825.77	35	8380.89	35	8270.36	35	17595.5	35	8747.63	35	30183.7	35	6626.27	35	4226.78	35	10088.6	35	21595.4	35	8577.41	35	8852.05	35	8859.62	35	5369.37	35	10493.7	35	8211.44	35
	40	5910.85	40	4029.25	40	4600.45	40	4849.82	40	5808.29	40	6289.14	40	4447.63	40	3597.45	40	7015.69	40	9061.61	40	8792.06	40	17901.9	40	8713.18	40	34574.6	40	6803.81	40	4156.88	40	9538.95	40	21482	40	10830.8	40	8163.86	40	9650.15	40	5303.55	40	9912.74	40	8448.28	40
	45	5466.24	45	3799.68	45	4372.36	45	5102.34	45	6025.23	45	5948.1	45	4018.67	45	3465.11	45	7126.07	45	9786.17	45	8103.2	45	18670.4	45	7784.98	45	35738.9	45	7175.77	45	4845.05	45	9622.69	45	27444.3	45	9438.33	45	7318.39	45	9543.01	45	5491.61	45	9312.17	45	9756.04	45
	50	5766.9	50	3888.64	50	4423.22	50	5121.49	50	6495.49	50	5791.28	50	3794.77	50	3686.88	50	6921.36	50	9226.5	50	7860.95	50	19191.6	50	7124.77	50	35085	50	7023.78	50	5143.61	50	11056.4	50	32612.4	50	8871.74	50	7575.6	50	7989.12	50	5582.05	50	9980.44	50	9472.93	50
	55	5699.36	55	3991.89	55	4643.1	55	5078.94	55	7157.38	55	5645.26	55	3837.87	55	3630.96	55	7097.24	55	8498.03	55	8055.78	55	19804.2	55	7517.12	55	36697.8	55	6169.05	55	4808.84	55	12178.8	55	27925.9	55	7526.86	55	8142.61	55	7513.28	55	5605.7	55	12219.1	55	8785.37	55
	60	4952	60	3849.72	60	4621.57	60	5011.71	60	7069.58	60	5668.4	60	4199.79	60	3829.51	60	6397.7	60	7357.9	60	8351.26	60	21075.9	60	6756.84	60	39820.2	60	6001.38	60	4991.82	60	11386.5	60	21044.2	60	6231.42	60	7981.33	60	9147.2	60	6076.67	60	10666	60	7344.32	60
	65	5271.76	65	4267.03	65	4435.69	65	5961.1	65	7386.51	65	5808.85	65	4153.49	65	3613.84	65	5539.17	65	7457.8	65	8062.06	65	21797.3	65	8007.73	65	33207.5	65	6578.22	65	5080.52	65	9335.92	65	20102	65	7935.47	65	7047.42	65	9787.47	65	6578.84	65	8769.32	65	7265.45	65
	70	5389.16	70	3812.77	70	4417.22	70	6394.49	70	6397.15	70	6915.66	70	3814.83	70	3472.95	70	5077.92	70	9035.91	70	7755.15	70	25473.7	70	7742.09	70	31841.4	70	7916.06	70	4871.54	70	8193.44	70	23540.2	70	10865	70	6745.94	70	9928.01	70	7340.65	70	7996.31	70	8805.99	70
	75	6334.25	75	3915.97	75	5165.3	75	5257.45	75	5871.35	75	7363.84	75	4631.47	75	3409.79	75	6240.52	75	9514.36	75	9374.94	75	28596.3	75	8751.44	75	39832	75	8805.39	75	5739.83	75	9115.89	75	23045.3	75	12057.6	75	6622.79	75	9355.69	75	6602.17	75	8588.73	75	9086.34	75
	80	8152.27	80	4442.82	80	5449.68	80	4997.54	80	6399.76	80	7539.61	80	4610.56	80	3529.24	80	6873.34	80	9896.92	80	10832.5	80	26609.7	80	11013.5	80	40987.6	80	8877.22	80	6118.22	80	10861.3	80	19886.9	80	12922.9	80	6959.01	80	9944.37	80	6193.6	80	11869.8	80	9210.61	80
	85	7288.85	85	4154.27	85	4994.94	85	5013.04	85	7705.15	85	7517.94	85	3817.92	85	3829.05	85	5294.9	85	9155.47	85	10206.9	85	21500.7	85	11742.9	85	35270.2	85	7967.2	85	5726.16	85	14803.7	85	18393.9	85	9795.72	85	7556.88	85	10704.7	85	5544.8	85	13704.7	85	8994.32	85
	90	6186.99	90	3631.67	90	4885.34	90	4719.17	90	7376.18	90	5904.8	90	3708.59	90	3631.34	90	4734.44	90	6674.2	90	7691.22	90	17753.2	90	9064.46	90	31607.1	90	6740.46	90	5571.18	90	12188.2	90	16098.9	90	8955.26	90	7110.39	90	10782.1	90	5123.2	90	10581.8	90	6612.66	90
	95	6349.55	95	3597.96	95	4507.93	95	4535.3	95	6344.1	95	5462.68	95	3489.07	95	3435.39	95	4635	95	5773.3	95	7518.18	95	16541	95	6798.76	95	29016.3	95	6884.65	95	5833.5	95	9785.96	95	16284.3	95	7701.04	95	7314.8	95	8567.38	95	5242.8	95	10215.3	95	5920.24	95
	100	5834.46	100	3382.03	100	4256.02	100	4879.97	100	6205.63	100	5116.79	100	3496.32	100	3394.05	100	4246.39	100	6654.52	100	7030.06	100	15684.5	100	6257	100	24435.6	100	6133.31	100	4762.07	100	10052.4	100	17152	100	5335.34	100	7772.96	100	6201.16	100	5294	100	9471.07	100	6560.54	100
	0		0		0		0		0		0		0		0		0		0		0		0		0		0		0		0		0		0		0		0		0		0		0		0		0
	5	1	5	1	5	1	5	1	5	1	5	1	5	1	5	1	5	1	5	1	5	1	5	1	5	1	5	1	5	1	5	1	5	1	5	1	5	1	5	1	5	1	5	1	5	1	5	1	5
	10	0.683222	10	0.819344	10	0.85529	10	0.77248	10	0.988143	10	0.820463	10	0.930256	10	0.719748	10	0.776156	10	0.861017	10	0.778424	10	0.900586	10	0.573712	10	0.997585	10	0.753246	10	0.890192	10	0.866115	10	0.90215	10	0.649972	10	0.936559	10	0.79232	10	0.949978	10	0.958759	10	1.09536	10
	15	0.662315	15	0.693181	15	0.733889	15	0.626857	15	0.890964	15	0.614888	15	0.692246	15	0.554024	15	0.613846	15	0.689352	15	0.61243	15	0.838535	15	0.432885	15	0.887038	15	0.58844	15	0.621036	15	0.582437	15	0.736289	15	0.547524	15	0.722729	15	0.605179	15	0.948225	15	0.681132	15	0.851206	15
	20	0.579237	20	0.666405	20	0.697032	20	0.580784	20	0.74597	20	0.489532	20	0.645417	20	0.489027	20	0.560508	20	0.566724	20	0.508082	20	0.806712	20	0.390994	20	0.865444	20	0.622029	20	0.593259	20	0.478004	20	0.579916	20	0.429425	20	0.620865	20	0.584142	20	0.925447	20	0.490054	20	0.715304	20
	25	0.569799	25	0.669536	25	0.666738	25	0.582741	25	0.561695	25	0.463398	25	0.674676	25	0.440232	25	0.546074	25	0.472411	25	0.503346	25	0.744965	25	0.365245	25	0.902716	25	0.624841	25	0.586235	25	0.458728	25	0.500755	25	0.3813	25	0.575958	25	0.570286	25	0.845094	25	0.48122	25	0.60016	25
	30	0.644698	30	0.720817	30	0.679382	30	0.561959	30	0.540239	30	0.459556	30	0.647696	30	0.419429	30	0.557576	30	0.507558	30	0.482902	30	0.690895	30	0.354182	30	0.935882	30	0.500575	30	0.557474	30	0.473579	30	0.513892	30	0.430156	30	0.572287	30	0.494866	30	0.789402	30	0.502234	30	0.568333	30
	35	0.638581	35	0.752828	35	0.666754	35	0.584426	35	0.538604	35	0.436688	35	0.627288	35	0.420449	35	0.565851	35	0.588166	35	0.535617	35	0.662396	35	0.382699	35	1.04512	35	0.427986	35	0.563053	35	0.489959	35	0.572986	35	0.457673	35	0.604836	35	0.488147	35	0.786669	35	0.534945	35	0.662091	35
	40	0.539616	40	0.713975	40	0.701069	40	0.613513	40	0.547939	40	0.374087	40	0.608255	40	0.41378	40	0.581594	40	0.635939	40	0.569404	40	0.673932	40	0.381191	40	1.19716	40	0.439453	40	0.553742	40	0.463265	40	0.569977	40	0.577908	40	0.557814	40	0.531703	40	0.777026	40	0.505329	40	0.681188	40
	45	0.499027	45	0.673296	45	0.666309	45	0.645456	45	0.568404	45	0.353802	45	0.54959	45	0.398558	45	0.590745	45	0.686788	45	0.524791	45	0.702861	45	0.340583	45	1.23747	45	0.463477	45	0.645413	45	0.467332	45	0.728175	45	0.50361	45	0.500046	45	0.5258	45	0.804578	45	0.474714	45	0.786633	45
	50	0.526474	50	0.689061	50	0.674059	50	0.647879	50	0.612768	50	0.344474	50	0.51897	50	0.424065	50	0.573775	50	0.647511	50	0.509102	50	0.722482	50	0.3117	50	1.21483	50	0.453661	50	0.685184	50	0.536963	50	0.865298	50	0.473378	50	0.51762	50	0.440184	50	0.817828	50	0.50878	50	0.763806	50
	55	0.520309	55	0.707356	55	0.707569	55	0.642496	55	0.675208	55	0.335788	55	0.524864	55	0.417634	55	0.588355	55	0.596387	55	0.52172	55	0.745544	55	0.328865	55	1.27067	55	0.398454	55	0.64059	55	0.591472	55	0.740952	55	0.401618	55	0.556362	55	0.413966	55	0.821295	55	0.622902	55	0.708368	55
	60	0.452081	60	0.682164	60	0.704287	60	0.633992	60	0.666925	60	0.337165	60	0.57436	60	0.44047	60	0.530364	60	0.516373	60	0.540856	60	0.793418	60	0.295604	60	1.37879	60	0.387625	60	0.664965	60	0.552993	60	0.558362	60	0.332496	60	0.545342	60	0.503992	60	0.890296	60	0.54373	60	0.592176	60
	65	0.481272	65	0.75611	65	0.675961	65	0.754091	65	0.696823	65	0.345519	65	0.568029	65	0.415665	65	0.459192	65	0.523384	65	0.522126	65	0.820578	65	0.350328	65	1.14982	65	0.424882	65	0.67678	65	0.453405	65	0.533363	65	0.423421	65	0.48153	65	0.539269	65	0.963868	65	0.44704	65	0.585816	65
	70	0.49199	70	0.675616	70	0.673145	70	0.808916	70	0.60349	70	0.411354	70	0.521713	70	0.399459	70	0.420955	70	0.634135	70	0.50225	70	0.958979	70	0.338707	70	1.10252	70	0.511292	70	0.648941	70	0.39792	70	0.624587	70	0.579735	70	0.460932	70	0.547013	70	1.07548	70	0.407634	70	0.710031	70
	75	0.578269	75	0.693902	75	0.787146	75	0.665079	75	0.553888	75	0.438012	75	0.633396	75	0.392194	75	0.517334	75	0.667713	75	0.607153	75	1.07653	75	0.382865	75	1.3792	75	0.568734	75	0.764607	75	0.442719	75	0.611458	75	0.643368	75	0.452517	75	0.515479	75	0.967287	75	0.437834	75	0.732635	75
	80	0.744241	80	0.78726	80	0.830483	80	0.632199	80	0.603736	80	0.448467	80	0.630537	80	0.405933	80	0.569794	80	0.694561	80	0.701551	80	1.00174	80	0.481828	80	1.41921	80	0.573373	80	0.815013	80	0.527485	80	0.527656	80	0.689543	80	0.47549	80	0.547914	80	0.907427	80	0.605094	80	0.742655	80
	85	0.665417	85	0.736129	85	0.761186	85	0.63416	85	0.726883	85	0.447178	85	0.522136	85	0.440418	85	0.438942	85	0.642526	85	0.661034	85	0.809411	85	0.513739	85	1.22124	85	0.514595	85	0.762787	85	0.718952	85	0.488041	85	0.52268	85	0.51634	85	0.589807	85	0.812371	85	0.698637	85	0.725215	85
	90	0.564826	90	0.643525	90	0.744483	90	0.596985	90	0.69585	90	0.351226	90	0.507184	90	0.417678	90	0.392481	90	0.468392	90	0.498109	90	0.668333	90	0.396559	90	1.09441	90	0.435361	90	0.742142	90	0.591926	90	0.42715	90	0.477835	90	0.485833	90	0.594072	90	0.750603	90	0.539435	90	0.533181	90
	95	0.579666	95	0.637552	95	0.686969	95	0.573725	95	0.598486	95	0.324929	95	0.477162	95	0.395139	95	0.384237	95	0.405167	95	0.486903	95	0.622699	95	0.297438	95	1.0047	95	0.444674	95	0.777086	95	0.475262	95	0.432067	95	0.410912	95	0.4998	95	0.472045	95	0.768125	95	0.520755	95	0.477351	95
	100	0.532642	100	0.599289	100	0.648581	100	0.617326	100	0.585423	100	0.304354	100	0.478154	100	0.390385	100	0.352022	100	0.467011	100	0.455291	100	0.590457	100	0.273736	100	0.846091	100	0.396146	100	0.63436	100	0.4882	100	0.455091	100	0.284683	100	0.531105	100	0.341671	100	0.775627	100	0.482814	100	0.528979	100
[truncated: 5 more columns]

## Sheet: Summary (N)
% Chromosome Length		Mean	STDDEV	SEM		Mean	STDDEV	SEM
0-5	IF	1	0	0	FISH	218.966	60.282	12.0564
5-10		0.849254	0.118066	0.0236131		225.593	69.1317	13.8263
10-15		0.688171	0.121279	0.0242557		228.849	70.4794	14.0959
15-20		0.609386	0.127313	0.0254627		234.383	77.5621	15.5124
20-25		0.571057	0.127066	0.0254132		240.585	85.681	17.1362
25-30		0.563391	0.125118	0.0250235		246.368	94.1274	18.8255
30-35		0.580698	0.137318	0.0274636		250.222	96.3227	19.2645
35-40		0.589704	0.158885	0.031777		265.619	107.369	21.4738
40-45		0.596791	0.178464	0.0356929		291.36	141.287	28.2574
45-50		0.603985	0.183893	0.0367786		330.585	196.583	39.3165
50-55		0.605381	0.189536	0.0379073		372.268	241.902	48.3804
55-60		0.591006	0.211464	0.0422929		454.554	297.179	59.4359
60-65		0.587134	0.18829	0.0376581		611.359	446.055	89.211
65-70		0.605345	0.199021	0.0398042		854.623	560.961	112.192
70-75		0.64636	0.221387	0.0442774		1150.07	524.477	104.895
75-80		0.679474	0.207792	0.0415585		1274.22	556.137	111.227
80-85		0.646594	0.16486	0.032972		1003.51	370.269	74.0538
85-90		0.566902	0.156066	0.0312131		671.492	287.229	57.4458
90-95		0.529855	0.154308	0.0308617		461.091	182.685	36.537
95-100		0.500239	0.140332	0.0280664		334.285	94.2987	18.8597
