# Supplementary material for: Large domains of heterochromatin direct the formation of short mitotic chromosome loops
Source: eLife. 2020 Sep 11;9:e57212. doi: 10.7554/eLife.57212 (PMC7515631; doi:10.7554/eLife.57212)
Supplement: Figure 5—figure supplement 1—source data 6. [file elife-57212-fig5-figsupp1-data6.xlsx]

## Sheet: FISH Binned
9	1	FISH	2	FISH	4	FISH	9	FISH	10	FISH	11	FISH	12	FISH	14	FISH	16	FISH	20	FISH	21	FISH	22	FISH	23	FISH	24A	FISH	24B	FISH	25	FISH	26	FISH	27	FISH	28A	FISH	28B	FISH	28C	FISH	28D	FISH	29A	FISH	29B	FISH	30
X	X	Y	X	Y	X	Y	X	Y	X	Y	X	Y	X	Y	X	Y	X	Y	X	Y	X	Y	X	Y	X	Y	X	Y	X	Y	X	Y	X	Y	X	Y	X	Y	X	Y	X	Y	X	Y	X	Y	X	Y	X
0	0	213	0	219	0	206	0	173	0	201	0	204	0	185	0	182	0	188	0	186	0	185	0	188	0	205	0	202	0	198	0	210	0	212	0	189	0	219	0	224	0	210	0	253	0	179	0	184	0
0.11	0.925926	221.56	0.497512	209.13	0.862069	199.18	0.46729	168.63	0.833333	197.25	1.02041	199	0.740741	172.83	0.847458	190.47	0.961538	200.88	0.833333	192.1	0.70922	174.373	0.884956	191.718	1.5625	201.41	0.990099	201.02	0.934579	196.19	0.819672	206.69	0.724638	202.08	0.625	202.42	0.900901	203.28	0.70922	237	1.03093	215.08	0.990099	263.25	0.925926	182.51	0.917431	183.704	0.75188
0.22	1.85185	219.76	0.995025	192.52	1.72414	205.76	0.934579	168.92	1.66667	189.66	2.04082	192.38	1.48148	176.719	1.69492	186.87	1.92308	194.02	1.66667	189.76	1.41844	175.155	1.76991	198.245	3.125	204.6	1.9802	212.92	1.86916	188.23	1.63934	201.27	1.44928	203.08	1.25	209.09	1.8018	209.9	1.41844	214	2.06186	204.95	1.9802	269.56	1.85185	184.79	1.83486	189.761	1.50376
0.33	2.77778	209.87	1.49254	181.11	2.58621	215.85	1.40187	171.75	2.5	179.95	3.06122	194.25	2.22222	176.863	2.54237	185.63	2.88462	184.79	2.5	190.03	2.12766	176.814	2.65487	192.369	4.6875	214.61	2.9703	199.58	2.80374	202.49	2.45902	215.73	2.17391	195.5	1.875	197.89	2.7027	216.45	2.12766	231	3.09278	208.68	2.9703	271.4	2.77778	188.99	2.75229	188.788	2.25564
0.44	3.7037	206.89	1.99005	177.3	3.44828	226.75	1.86916	177.5	3.33333	181.2	4.08163	196.26	2.96296	175.548	3.38983	181.1	3.84615	190.76	3.33333	190.65	2.83688	176.491	3.53982	190.789	6.25	227.67	3.9604	198.88	3.73832	212.68	3.27869	240.83	2.89855	203.28	2.5	191.49	3.6036	221.4	2.83688	227	4.12371	203.34	3.9604	261.5	3.7037	190.73	3.66972	188.598	3.00752
0.55	4.62963	208.16	2.48756	178.64	4.31034	220.94	2.33645	170.31	4.16667	174.16	5.10204	213.44	3.7037	180.572	4.23729	182.7	4.80769	192.3	4.16667	191.94	3.5461	176.811	4.42478	197.834	7.8125	220.31	4.9505	206.94	4.6729	218.49	4.09836	237.95	3.62319	203.21	3.125	192.05	4.5045	233.43	3.5461	231	5.15464	215.66	4.9505	281.52	4.62963	191.34	4.58716	187.344	3.7594
0.66	5.55556	207.64	2.98507	184.01	5.17241	214.96	2.80374	167.59	5	179.24	6.12245	205.91	4.44444	186.688	5.08475	180.83	5.76923	196.57	5	193.3	4.25532	179.232	5.30973	204.243	9.375	222.47	5.94059	221	5.60748	220.27	4.91803	239.6	4.34783	207.41	3.75	186.72	5.40541	251.24	4.25532	239	6.18557	207.61	5.94059	260.04	5.55556	193.5	5.50459	184.796	4.51128
0.77	6.48148	211.16	3.48259	187.5	6.03448	209.77	3.27103	172.47	5.83333	180.07	7.14286	208.15	5.18519	169.886	5.9322	201.78	6.73077	203.08	5.83333	193.83	4.96454	177.66	6.19469	200.943	10.9375	227.48	6.93069	219.02	6.54206	218.5	5.7377	242.65	5.07246	201.64	4.375	181.88	6.30631	248.82	4.96454	224	7.21649	209.98	6.93069	293.35	6.48148	200.05	6.42202	184.901	5.26316
0.88	7.40741	215.78	3.9801	178.48	6.89655	203.94	3.73832	169.93	6.66667	176.15	8.16327	211.12	5.92593	170.631	6.77966	194.17	7.69231	197.5	6.66667	195.5	5.67376	177.659	7.07965	198.955	12.5	239.69	7.92079	221.29	7.47664	220.91	6.55738	224.28	5.7971	210.22	5	183.65	7.20721	266.36	5.67376	232	8.24742	212.93	7.92079	273.57	7.40741	198.62	7.33945	181.399	6.01504
0.99	8.33333	214.98	4.47761	180.59	7.75862	201.78	4.20561	169.71	7.5	180.49	9.18367	223.05	6.66667	168.029	7.62712	233.48	8.65385	200.58	7.5	194.15	6.38298	183.912	7.9646	201.768	14.0625	261.5	8.91089	218.62	8.41121	219.2	7.37705	215.58	6.52174	206.32	5.625	189.4	8.10811	291.85	6.38298	244	9.27835	207.32	8.91089	295.03	8.33333	192.5	8.25688	183.128	6.76692
1.1	9.25926	217	4.97512	189.48	8.62069	202.53	4.6729	172.15	8.33333	181.29	10.2041	227.5	7.40741	176.362	8.47458	235.92	9.61538	203.9	8.33333	190.83	7.0922	181.48	8.84956	203.961	15.625	297.71	9.90099	214.49	9.34579	222.78	8.19672	213.19	7.24638	212.89	6.25	194.26	9.00901	305.55	7.0922	238	10.3093	213.87	9.90099	270.46	9.25926	198.45	9.17431	184.432	7.5188
1.21	10.1852	224.61	5.47264	190.93	9.48276	206.34	5.14019	178.46	9.16667	187.81	11.2245	229.14	8.14815	177.996	9.32203	221.8	10.5769	212.75	9.16667	196.43	7.80142	182.048	9.73451	210.772	17.1875	345.58	10.8911	221.62	10.2804	216.64	9.01639	196.65	7.97101	205.09	6.875	191.12	9.90991	391.02	7.80142	252	11.3402	213.98	10.8911	284.79	10.1852	207.39	10.0917	188.462	8.27068
1.32	11.1111	234.77	5.97015	189.32	10.3448	215.77	5.60748	186.39	10	198.75	12.2449	217.88	8.88889	178.448	10.1695	206.28	11.5385	211.05	10	204.28	8.51064	183.821	10.6195	203.712	18.75	357.71	11.8812	227.3	11.215	213.93	9.83607	213.07	8.69565	199.88	7.5	194.94	10.8108	461.18	8.51064	240	12.3711	213.42	11.8812	303.03	11.1111	204.03	11.0092	197.598	9.02256
1.43	12.037	240.45	6.46766	194.75	11.2069	225.22	6.07477	193.95	10.8333	188.73	13.2653	220.41	9.62963	174.635	11.0169	199.2	12.5	212.01	10.8333	196.01	9.21986	179.263	11.5044	214.757	20.3125	392.42	12.8713	230.95	12.1495	225.01	10.6557	206.43	9.42029	200.71	8.125	185.58	11.7117	568.31	9.21986	248.93	13.4021	233.59	12.8713	310.67	12.037	207	11.9266	205.847	9.77444
1.54	12.963	244.6	6.96517	196.37	12.069	238.14	6.54206	208.09	11.6667	193.41	14.2857	213.75	10.3704	175.079	11.8644	189.91	13.4615	220.14	11.6667	211.11	9.92908	179.438	12.3894	227.906	21.875	463.38	13.8614	226.51	13.0841	229.38	11.4754	217.65	10.1449	204.64	8.75	194.13	12.6126	611.03	9.92908	271.21	14.433	239.53	13.8614	299.55	12.963	214.58	12.844	197.385	10.5263
1.65	13.8889	259.36	7.46269	193.41	12.931	244.69	7.00935	190.45	12.5	211.36	15.3061	232.19	11.1111	178.546	12.7119	195.3	14.4231	226.32	12.5	225.26	10.6383	178.829	13.2743	233.202	23.4375	561.27	14.8515	232.54	14.0187	230.3	12.2951	216.43	10.8696	210.8	9.375	192.71	13.5135	686.83	10.6383	268.67	15.4639	240.66	14.8515	313.37	13.8889	214.08	13.7615	197.073	11.2782
1.76	14.8148	262.44	7.9602	203.74	13.7931	240.07	7.47664	179.79	13.3333	199.5	16.3265	229.94	11.8519	182.739	13.5593	196.24	15.3846	230.54	13.3333	221.81	11.3475	173.291	14.1593	239.59	25	644.99	15.8416	247.28	14.9533	231.03	13.1148	212.16	11.5942	213.42	10	184.34	14.4144	833.77	11.3475	268.51	16.4948	244.34	15.8416	316.85	14.8148	209.15	14.6789	196.96	12.0301
1.87	15.7407	270.3	8.45771	194.52	14.6552	244.92	7.94393	188.35	14.1667	195.36	17.3469	231.13	12.5926	186.967	14.4068	200.04	16.3462	235.45	14.1667	220.31	12.0567	185.437	15.0442	253.882	26.5625	735.05	16.8317	250.49	15.8879	236.08	13.9344	228.74	12.3188	214.98	10.625	182.29	15.3153	1059.2	12.0567	284.68	17.5258	268.04	16.8317	323.39	15.7407	210.37	15.5963	206.911	12.782
1.98	16.6667	273.88	8.95522	195.37	15.5172	239.11	8.41121	178.48	15	203.15	18.3673	258.67	13.3333	177.735	15.2542	203.1	17.3077	251.45	15	225.46	12.766	185.09	15.9292	261.473	28.125	827.29	17.8218	255.7	16.8224	232.97	14.7541	239.45	13.0435	213.08	11.25	202.37	16.2162	1291.84	12.766	296.44	18.5567	264.9	17.8218	352.16	16.6667	218.44	16.5138	212.847	13.5338
2.09	17.5926	304.95	9.45274	200.05	16.3793	232.44	8.8785	183.93	15.8333	217.74	19.3878	304.75	14.0741	176.835	16.1017	200	18.2692	271.22	15.8333	232.41	13.4752	189.765	16.8142	267.714	29.6875	896.99	18.8119	272.68	17.757	243.13	15.5738	238.3	13.7681	220.62	11.875	202.6	17.1171	1500.25	13.4752	306.72	19.5876	279.13	18.8119	390.18	17.5926	221.78	17.4312	231.351	14.2857
2.2	18.5185	339.85	9.95025	199.22	17.2414	250.94	9.34579	184.75	16.6667	210.18	20.4082	313.92	14.8148	180.199	16.9492	199.52	19.2308	285.06	16.6667	235.2	14.1844	192.417	17.6991	262.151	31.25	966.18	19.802	288.37	18.6916	237.28	16.3934	244.16	14.4928	219.41	12.5	192.23	18.018	1660.9	14.1844	328.21	20.6186	314.67	19.802	397.77	18.5185	220.75	18.3486	249.877	15.0376
2.31	19.4444	364.29	10.4478	198.73	18.1034	239.92	9.81308	180.17	17.5	217.32	21.4286	330.19	15.5556	188.581	17.7966	197.62	20.1923	307.27	17.5	240.89	14.8936	198.305	18.5841	278.652	32.8125	1056.13	20.7921	291.76	19.6262	252.69	17.2131	277.16	15.2174	209.51	13.125	195.97	18.9189	1791.18	14.8936	360.92	21.6495	354.23	20.7921	476.94	19.4444	226.52	19.2661	257.323	15.7895
2.42	20.3704	393.99	10.9453	200.84	18.9655	242.24	10.2804	174.17	18.3333	210.75	22.449	352.23	16.2963	194.873	18.6441	203.95	21.1538	358.61	18.3333	247.3	15.6028	191.777	19.469	291.14	34.375	1135.98	21.7822	341.09	20.5607	256.3	18.0328	281.03	15.942	211.19	13.75	206.06	19.8198	1892.09	15.6028	369.36	22.6804	395.4	21.7822	555.45	20.3704	226.34	20.1835	260.237	16.5414
2.53	21.2963	413.64	11.4428	205.96	19.8276	268.11	10.7477	184.77	19.1667	210.09	23.4694	422.31	17.037	186.285	19.4915	209.9	22.1154	411.98	19.1667	256.53	16.3121	195.699	20.354	299.685	35.9375	1255.81	22.7723	379.79	21.4953	264.96	18.8525	300.63	16.6667	218.55	14.375	213.45	20.7207	1909.3	16.3121	411.74	23.7113	442.46	22.7723	689.7	21.2963	240.24	21.1009	264.922	17.2932
2.64	22.2222	419.91	11.9403	215.92	20.6897	261.04	11.215	182.86	20	224.53	24.4898	458.72	17.7778	195.979	20.339	208.48	23.0769	472.31	20	275.84	17.0213	186.948	21.2389	299.193	37.5	1423.52	23.7624	408.99	22.4299	262.39	19.6721	325.57	17.3913	224.6	15	208.86	21.6216	1826.51	17.0213	486.47	24.7423	517.35	23.7624	796.75	22.2222	251.55	22.0183	280.95	18.0451
2.75	23.1481	436.51	12.4378	208.98	21.5517	305.79	11.6822	178.09	20.8333	226.55	25.5102	514.19	18.5185	193.284	21.1864	224.98	24.0385	573.05	20.8333	286.22	17.7305	203.154	22.1239	324.985	39.0625	1492.72	24.7525	444.12	23.3645	266.7	20.4918	340.27	18.1159	229.8	15.625	215.04	22.5225	1754.72	17.7305	580.62	25.7732	568.46	24.7525	950.55	23.1481	273.58	22.9358	316.295	18.797
2.86	24.0741	454.56	12.9353	211.21	22.4138	363.17	12.1495	190.57	21.6667	231.03	26.5306	559.97	19.2593	204.648	22.0339	236.01	25	721.49	21.6667	299.1	18.4397	201.617	23.0088	356.947	40.625	1513.5	25.7426	507.03	24.2991	283.61	21.3115	364.17	18.8406	230.12	16.25	214.62	23.4234	1740.71	18.4397	745.49	26.8041	694.63	25.7426	1109.91	24.0741	280.42	23.8532	341.381	19.5489
2.97	25	480	13.4328	229.17	23.2759	387.77	12.6168	181.82	22.5	239.12	27.551	651.83	20	206.533	22.8814	242.4	25.9615	843.74	22.5	349.75	19.1489	214.239	23.8938	374.717	42.1875	1508.14	26.7327	586.28	25.2336	293.23	22.1311	395.72	19.5652	225.09	16.875	224.43	24.3243	1712.1	19.1489	897.19	27.8351	787.5	26.7327	1282.15	25	297.16	24.7706	406.946	20.3008
3.08	25.9259	499.29	13.9303	231.44	24.1379	487.39	13.0841	183.32	23.3333	252.96	28.5714	726.32	20.7407	211.207	23.7288	244.96	26.9231	993.6	23.3333	398.75	19.8582	228.668	24.7788	384.524	43.75	1570.56	27.7228	676.9	26.1682	288.34	22.9508	448.79	20.2899	233.51	17.5	228.67	25.2252	1710.39	19.8582	995.15	28.866	897.86	27.7228	1482.27	25.9259	347.2	25.6881	462.662	21.0526
3.19	26.8519	511.96	14.4279	259.22	25	539.97	13.5514	191	24.1667	274.98	29.5918	803.36	21.4815	213.095	24.5763	246.99	27.8846	1178.4	24.1667	501.08	20.5674	239.736	25.6637	383.048	45.3125	1568.94	28.7129	741.96	27.1028	303.85	23.7705	523.93	21.0145	244.38	18.125	238.08	26.1261	1689.88	20.5674	1151.53	29.8969	1063.35	28.7129	1726.72	26.8519	407.84	26.6055	523.836	21.8045
3.3	27.7778	554.56	14.9254	286.12	25.8621	615.85	14.0187	191.56	25	312.02	30.6122	924.84	22.2222	220.319	25.4237	254.51	28.8462	1406.24	25	643.27	21.2766	237.566	26.5487	404.134	46.875	1469.78	29.703	927.68	28.0374	336.08	24.5902	691.56	21.7391	248.64	18.75	238.1	27.027	1524.01	21.2766	1308.2	30.9278	1286.35	29.703	1855.2	27.7778	489.91	27.5229	666.439	22.5564
3.41	28.7037	656.16	15.4229	308.25	26.7241	715.43	14.486	196.73	25.8333	344.58	31.6327	999.97	22.963	219.174	26.2712	260.04	29.8077	1556.56	25.8333	856.25	21.9858	247.378	27.4336	399.323	48.4375	1313.31	30.6931	1099.93	28.972	364.94	25.4098	966.44	22.4638	257.5	19.375	249.79	27.9279	1248.81	21.9858	1517.4	31.9588	1505.89	30.6931	1950.45	28.7037	601.89	28.4404	734.154	23.3083
3.52	29.6296	779.06	15.9204	341.24	27.5862	813.57	14.9533	198.54	26.6667	414.26	32.6531	1103.09	23.7037	229.548	27.1186	271.67	30.7692	1664.51	26.6667	1107.07	22.695	246.839	28.3186	386.029	50	1175.79	31.6832	1210.05	29.9065	406.26	26.2295	1236.46	23.1884	251.9	20	237.66	28.8288	1006.66	22.695	1584.15	32.9897	1759.33	31.6832	2032.58	29.6296	725.55	29.3578	736.694	24.0602
3.63	30.5556	904.95	16.4179	372.61	28.4483	934.87	15.4206	199.34	27.5	512.73	33.6735	1154.62	24.4444	251.326	27.9661	272.15	31.7308	1668.84	27.5	1338.99	23.4043	249.766	29.2035	387.499	51.5625	1047.83	32.6733	1307.84	30.8411	453.29	27.0492	1422.3	23.913	268.16	20.625	256.94	29.7297	812.04	23.4043	1505.3	34.0206	1928.45	32.6733	2056.42	30.5556	901.84	30.2752	786.045	24.812
3.74	31.4815	1042.96	16.9154	376.56	29.3103	1093.46	15.8879	200.93	28.3333	606.51	34.6939	1223	25.1852	263.282	28.8136	267.2	32.6923	1776.05	28.3333	1497.26	24.1135	256.594	30.0885	412.041	53.125	989.89	33.6634	1358.26	31.7757	526.8	27.8689	1526.94	24.6377	276.7	21.25	274.68	30.6306	693.83	24.1135	1411.28	35.0515	2095.67	33.6634	2000.95	31.4815	1061.77	31.1927	855.499	25.5639
3.85	32.4074	1251.72	17.4129	320.4	30.1724	1229.49	16.3551	209.43	29.1667	740.97	35.7143	1263.79	25.9259	273.526	29.661	277.82	33.6538	1692.3	29.1667	1616.68	24.8227	260.63	30.9735	414.521	54.6875	911.1	34.6535	1381.85	32.7103	632.81	28.6885	1568.5	25.3623	286.05	21.875	298.32	31.5315	547.33	24.8227	1335.75	36.0825	2127.49	34.6535	2026.13	32.4074	1193.85	32.1101	919.155	26.3158
3.96	33.3333	1412	17.9104	306	31.0345	1370.64	16.8224	199.93	30	884.14	36.7347	1269.13	26.6667	305.279	30.5085	290.92	34.6154	1531.18	30	1687.3	25.5319	267.56	31.8584	432.02	56.25	844.66	35.6436	1284.52	33.6449	678	29.5082	1486.52	26.087	313.8	22.5	307.6	32.4324	487.9	25.5319	1330.85	37.1134	2192.76	35.6436	1973.13	33.3333	1345.07	33.0275	993.84	27.0677
4.07	34.2593	1531.99	18.408	315.16	31.8966	1505.12	17.2897	216.63	30.8333	1046.88	37.7551	1233.93	27.4074	323.765	31.3559	335.45	35.5769	1430.4	30.8333	1798.9	26.2411	299.785	32.7434	460.447	57.8125	754.8	36.6337	1228.88	34.5794	835.89	30.3279	1432.4	26.8116	345.22	23.125	330.56	33.3333	414.05	26.2411	1387.14	38.1443	2217.42	36.6337	1783.02	34.2593	1385.78	33.945	1020.82	27.8195
4.18	35.1852	1594.71	18.9055	322.57	32.7586	1620.81	17.757	218.35	31.6667	1174.65	38.7755	1205.82	28.1481	367.207	32.2034	398.81	36.5385	1359.06	31.6667	1846.82	26.9504	310.292	33.6283	501.151	59.375	638.37	37.6238	1153.11	35.514	1015.22	31.1475	1388.41	27.5362	410.17	23.75	409.87	34.2342	359.74	26.9504	1490.49	39.1753	2243.81	37.6238	1573.06	35.1852	1462.09	34.8624	1004.5	28.5714
4.29	36.1111	1609.69	19.403	315.35	33.6207	1630.28	18.2243	220.69	32.5	1301.26	39.7959	1093.7	28.8889	440.461	33.0508	477.23	37.5	1320.05	32.5	1807.94	27.6596	317.684	34.5133	584.689	60.9375	552.99	38.6139	1031.59	36.4486	1194.25	31.9672	1388.14	28.2609	502.38	24.375	497.24	35.1351	316.19	27.6596	1551.18	40.2062	2054.29	38.6139	1304.5	36.1111	1520.77	35.7798	939.812	29.3233
4.4	37.037	1550.71	19.9005	333.75	34.4828	1597.73	18.6916	226.6	33.3333	1415	40.8163	946.97	29.6296	552.947	33.8983	460.24	38.4615	1136.68	33.3333	1807.68	28.3688	340.5	35.3982	650.5	62.5	503.64	39.604	959.74	37.3832	1257.3	32.7869	1434.47	28.9855	616.52	25	635.12	36.036	294.77	28.3688	1544.7	41.2371	1771.84	39.604	1050.04	37.037	1511.04	36.6972	925.612	30.0752
4.51	37.963	1481.94	20.398	341.02	35.3448	1384	19.1589	245.87	34.1667	1511.76	41.8367	781.45	30.3704	582.502	34.7458	524.1	39.4231	980.72	34.1667	1847.77	29.078	397.971	36.2832	718.782	64.0625	461.36	40.5941	852.27	38.3178	1408.33	33.6066	1560.42	29.7101	695.53	25.625	760.65	36.9369	270.02	29.078	1466.4	42.268	1459.74	40.5941	818.98	37.963	1559.69	37.6147	848.886	30.8271
4.62	38.8889	1432.93	20.8955	363.59	36.2069	1235.16	19.6262	263.22	35	1455.11	42.8571	676.09	31.1111	639.603	35.5932	669.32	40.3846	807.74	35	1791.73	29.7872	497.893	37.1681	797.366	65.625	412.73	41.5842	732.78	39.2523	1498.09	34.4262	1557.22	30.4348	761.22	26.25	880.17	37.8378	259.37	29.7872	1403.88	43.299	1192.73	41.5842	618.55	38.8889	1584.45	38.5321	836.259	31.5789
4.73	39.8148	1328.43	21.393	403.31	37.069	1111.17	20.0935	289.57	35.8333	1527.95	43.8776	571.99	31.8519	725.422	36.4407	849.51	41.3462	709.17	35.8333	1618.24	30.4965	599.626	38.0531	913.8	67.1875	351.68	42.5743	621.09	40.1869	1483.48	35.2459	1404.38	31.1594	862.3	26.875	984.82	38.7387	249.15	30.4965	1255.32	44.3299	989.57	42.5743	498.69	39.8148	1610.4	39.4495	793.596	32.3308
4.84	40.7407	1195.85	21.8905	489.14	37.931	1002.72	20.5607	324.53	36.6667	1573.91	44.898	507.63	32.5926	824.011	37.2881	954.9	42.3077	560.84	36.6667	1357.94	31.2057	673.79	38.9381	903.899	68.75	355.93	43.5644	542.1	41.1215	1420.63	36.0656	1283.09	31.8841	858.52	27.5	1123.37	39.6396	242.58	31.2057	1078.55	45.3608	823.35	43.5644	421.42	40.7407	1620.67	40.367	747.157	33.0827
4.95	41.6667	1083.87	22.3881	572.74	38.7931	917.24	21.028	391.18	37.5	1565.65	45.9184	414.07	33.3333	883.651	38.1356	1080.41	43.2692	447.5	37.5	1101.89	31.9149	738.196	39.823	864.228	70.3125	332.29	44.5545	459.81	42.0561	1382.94	36.8852	1109.1	32.6087	874.05	28.125	1298.05	40.5405	240.85	31.9149	905.04	46.3918	705.18	44.5545	373.98	41.6667	1579.72	41.2844	729.454	33.8346
5.06	42.5926	989.38	22.8856	698.03	39.6552	786.24	21.4953	440.85	38.3333	1511.38	46.9388	372.41	34.0741	878.855	38.9831	1189.92	44.2308	344.64	38.3333	849.46	32.6241	811.121	40.708	806.859	71.875	289.07	45.5446	389.04	42.9907	1241.3	37.7049	893.88	33.3333	934.92	28.75	1449.7	41.4414	229.23	32.6241	768.12	47.4227	623.54	45.5446	330.01	42.5926	1500.42	42.2018	719.423	34.5865
5.17	43.5185	888	23.3831	873.43	40.5172	668.16	21.9626	493.29	39.1667	1401.08	47.9592	315.7	34.8148	873.236	39.8305	1297.31	45.1923	319.68	39.1667	675.55	33.3333	901.58	41.5929	782.135	73.4375	272.2	46.5347	326.7	43.9252	1133.02	38.5246	677.19	34.058	1008.1	29.375	1511.42	42.3423	228.39	33.3333	617.38	48.4536	531.03	46.5347	321.98	43.5185	1280.33	43.1193	658.096	35.3383
5.28	44.4444	744.61	23.8806	1061.79	41.3793	522.81	22.4299	542.9	40	1336.69	48.9796	260.41	35.5556	874.792	40.678	1360.86	46.1538	285.14	40	534.29	34.0426	1002.61	42.4779	794.777	75	265.53	47.5248	305.63	44.8598	1143.04	39.3443	584.36	34.7826	1044.19	30	1569.98	43.2432	206.28	34.0426	511.67	49.4845	459.92	47.5248	315.57	44.4444	1085.22	44.0367	563.685	36.0902
5.39	45.3704	670.67	24.3781	1277.82	42.2414	424.43	22.8972	625.29	40.8333	1200.35	50	231.67	36.2963	857.187	41.5254	1420.05	47.1154	255.55	40.8333	458.28	34.7518	1075.91	43.3628	809.805	76.5625	249.38	48.5149	274.8	45.7944	1073.37	40.1639	483.52	35.5072	1113.73	30.625	1635.26	44.1441	203.73	34.7518	452.54	50.5155	398.82	48.5149	296.27	45.3704	943.2	44.9541	501.184	36.8421
5.5	46.2963	642.77	24.8756	1583.17	43.1034	352.96	23.3645	694.21	41.6667	1070.31	51.0204	223.1	37.037	864.89	42.3729	1325.95	48.0769	238.09	41.6667	390.26	35.461	1115.99	44.2478	849.697	78.125	244.93	49.505	266.79	46.729	941.68	40.9836	408.94	36.2319	1231.12	31.25	1749.39	45.045	196.86	35.461	403.03	51.5464	353.31	49.505	286.77	46.2963	743.65	45.8716	439.392	37.594
5.61	47.2222	586.62	25.3731	1797.41	43.9655	330.88	23.8318	817.51	42.5	957.36	52.0408	226.3	37.7778	920.361	43.2203	1246.53	49.0385	238.18	42.5	362.1	36.1702	1114.17	45.1327	844.85	79.6875	234.61	50.495	252.61	47.6636	821.6	41.8033	365.09	36.9565	1263.15	31.875	1813.27	45.9459	193.46	36.1702	356.93	52.5773	341.66	50.495	289.39	47.2222	621.62	46.789	407.677	38.3459
5.72	48.1481	538.53	25.8706	2055.64	44.8276	292.3	24.2991	934.96	43.3333	866.56	53.0612	214.17	38.5185	1006.21	44.0678	1164.7	50	226.42	43.3333	330.32	36.8794	1119.46	46.0177	777.473	81.25	223.96	51.4851	239	48.5981	675.37	42.623	345.89	37.6812	1294.09	32.5	1930.9	46.8468	192.17	36.8794	323.18	53.6082	341.36	51.4851	290.81	48.1481	521.92	47.7064	346.481	39.0977
5.83	49.0741	502.84	26.3682	2296.89	45.6897	269.76	24.7664	1133.14	44.1667	775.5	54.0816	202.11	39.2593	1087.63	44.9153	1030.6	50.9615	221.11	44.1667	312.53	37.5887	1091.83	46.9027	676.907	82.8125	228.68	52.4752	239.45	49.5327	529.18	43.4426	307.43	38.4058	1396.97	33.125	2000.53	47.7477	205.13	37.5887	314.28	54.6392	333.49	52.4752	277.13	49.0741	394.03	48.6239	283.301	39.8496
5.94	50	468.1	26.8657	2189.78	46.5517	258.26	25.2336	1306.35	45	635.09	55.102	204.8	40	1108.63	45.7627	978.75	51.9231	226.29	45	299.38	38.2979	1039.11	47.7876	673.477	84.375	228.53	53.4653	239.6	50.4673	435.32	44.2623	285.15	39.1304	1491.17	33.75	2027.77	48.6486	198.01	38.2979	313.42	55.6701	323.32	53.4653	276.78	50	327.21	49.5413	259.232	40.6015
6.05	50.9259	468.96	27.3632	2075.85	47.4138	265.54	25.7009	1444.49	45.8333	547.4	56.1224	209.1	40.7407	1135.06	46.6102	899.76	52.8846	222	45.8333	281.81	39.0071	921.819	48.6726	649.306	85.9375	222.5	54.4554	237.99	51.4019	369.12	45.082	280.33	39.8551	1575.71	34.375	2070.08	49.5495	206.25	39.0071	285.63	56.701	331.03	54.4554	269.1	50.9259	293.08	50.4587	240.126	41.3534
6.16	51.8519	465.31	27.8607	2038.1	48.2759	276.62	26.1682	1533.24	46.6667	474.82	57.1429	197.62	41.4815	1119.85	47.4576	831.44	53.8462	211.91	46.6667	276.99	39.7163	811.326	49.5575	640.484	87.5	226.25	55.4455	225.27	52.3364	330.71	45.9016	278.91	40.5797	1570.79	35	1923.49	50.4505	213.62	39.7163	276.43	57.732	332.63	55.4455	253.11	51.8519	262.5	51.3761	232.388	42.1053
6.27	52.7778	431.51	28.3582	1967.34	49.1379	264.71	26.6355	1521.59	47.5	403.1	58.1633	195.68	42.2222	990.162	48.3051	707.73	54.8077	203.57	47.5	264.4	40.4255	712.421	50.4425	595.452	89.0625	212.3	56.4356	219.48	53.271	297.73	46.7213	257.21	41.3043	1535.27	35.625	1745.93	51.3514	207.21	40.4255	265.95	58.7629	347.09	56.4356	249.66	52.7778	249.3	52.2936	217.239	42.8571
6.38	53.7037	388.02	28.8557	2098.37	50	242.86	27.1028	1533.64	48.3333	333.84	59.1837	195.99	42.963	838.189	49.1525	596.66	55.7692	197.81	48.3333	253.8	41.1348	577.834	51.3274	553.684	90.625	195.37	57.4257	218.77	54.2056	290.65	47.541	244.65	42.029	1436.35	36.25	1634.13	52.2523	208.46	41.1348	277.99	59.7938	308.57	57.4257	250.45	53.7037	225.17	53.211	210.412	43.609
6.49	54.6296	340.13	29.3532	2164.17	50.8621	234.06	27.5701	1550.78	49.1667	309.38	60.2041	194.66	43.7037	741.905	50	501.55	56.7308	196.25	49.1667	258.45	41.844	519.029	52.2124	441.701	92.1875	190.83	58.4158	218.37	55.1402	283.92	48.3607	245.7	42.7536	1269.23	36.875	1537	53.1532	203.45	41.844	280.8	60.8247	303.23	58.4158	235.08	54.6296	224.73	54.1284	208.253	44.3609
6.6	55.5556	309.81	29.8507	2141.82	51.7241	233.14	28.0374	1573.46	50	284.65	61.2245	184.23	44.4444	633.99	50.8475	445.97	57.6923	191.7	50	242.56	42.5532	477.611	53.0973	356.549	93.75	194.02	59.4059	213.85	56.0748	266.56	49.1803	230.23	43.4783	1050.51	37.5	1414.84	54.0541	185.66	42.5532	264.37	61.8557	299.26	59.4059	225.84	55.5556	211.59	55.0459	210.763	45.1128
6.71	56.4815	290.77	30.3483	1933.63	52.5862	221.94	28.5047	1561.4	50.8333	257.26	62.2449	179.69	45.1852	476.679	51.6949	393.01	58.6538	193.74	50.8333	243.73	43.2624	452.178	53.9823	329.664	95.3125	202.2	60.396	213	57.0093	246.31	50	220.76	44.2029	851.96	38.125	1239.76	54.955	202.7	43.2624	259.97	62.8866	305.13	60.396	226.23	56.4815	214.19	55.9633	201.065	45.8647
6.82	57.4074	283.58	30.8458	1816.8	53.4483	208.71	28.972	1603.22	51.6667	233.36	63.2653	180.24	45.9259	399.721	52.5424	337.59	59.6154	192.64	51.6667	243.36	43.9716	405.371	54.8673	294.276	96.875	196.39	61.3861	210.46	57.9439	247.11	50.8197	226.71	44.9275	690.53	38.75	1121.93	55.8559	188.8	43.9716	265.85	63.9175	307.32	61.3861	229.68	57.4074	212.05	56.8807	197.089	46.6165
6.93	58.3333	278.28	31.3433	1647.08	54.3103	215.63	29.4393	1574.11	52.5	233.58	64.2857	183.92	46.6667	356.158	53.3898	302.52	60.5769	187.03	52.5	230.37	44.6809	339.485	55.7522	258.547	98.4375	185.03	62.3762	219.2	58.8785	237.41	51.6393	222.1	45.6522	617.44	39.375	983.53	56.7568	190.04	44.6809	266.73	64.9485	295.77	62.3762	224.14	58.3333	203.28	57.7982	199.072	47.3684
7.04	59.2593	258.23	31.8408	1514.89	55.1724	215.31	29.9065	1504.49	53.3333	219.6	65.3061	182.64	47.4074	312.604	54.2373	278.24	61.5385	182.69	53.3333	223.65	45.3901	346.55	56.6372	216.897	100	185.18	63.3663	195.9	59.8131	227.07	52.459	212.79	46.3768	635.82	40	829.68	57.6577	185.69	45.3901	267.09	65.9794	292.29	63.3663	221.95	59.2593	200.94	58.7156	198.927	48.1203
7.15	60.1852	249.11	32.3383	1411.16	56.0345	222.46	30.3738	1509.3	54.1667	207.12	66.3265	176.47	48.1481	294.039	55.0847	259.44	62.5	186.12	54.1667	212.02	46.0993	295.661	57.5221	209.8			64.3564	212.61	60.7477	219.81	53.2787	213.02	47.1014	631.22	40.625	666.09	58.5586	179.08	46.0993	265	67.0103	302.75	64.3564	219.71	60.1852	201.9	59.633	193.41	48.8722
7.26	61.1111	253.71	32.8358	1212.28	56.8966	229.79	30.8411	1451.51	55	208.37	67.3469	173.67	48.8889	285.399	55.9322	246.65	63.4615	194.16	55	197.87	46.8085	270.045	58.4071	211.44			65.3465	208.59	61.6822	213.11	54.0984	212.32	47.8261	550.37	41.25	551.61	59.4595	178.15	46.8085	254.41	68.0412	295.85	65.3465	220.03	61.1111	193.89	60.5505	198.824	49.6241
7.37	62.037	240.6	33.3333	1016.79	57.7586	217.64	31.3084	1400.51	55.8333	207.18	68.3673	175.73	49.6296	271.174	56.7797	235.83	64.4231	184.98	55.8333	206.38	47.5177	271.667	59.292	208.18			66.3366	199.57	62.6168	219.77	54.918	204.58	48.5507	468.36	41.875	479.6	60.3604	180.42	47.5177	256.83	69.0722	303.71	66.3366	211.94	62.037	190.14	61.4679	205.778	50.3759
7.48	62.963	234.19	33.8308	831.12	58.6207	194.2	31.7757	1368.62	56.6667	199.11	69.3878	179.71	50.3704	267.522	57.6271	236.54	65.3846	190.2	56.6667	208.73	48.227	240.333	60.177	206.26			67.3267	197.6	63.5514	235.24	55.7377	195.56	49.2754	406.58	42.5	419.9	61.2613	183.47	48.227	270.56	70.1031	317.95	67.3267	220.7	62.963	182.1	62.3853	197.325	51.1278
7.59	63.8889	224.93	34.3284	660.45	59.4828	200.2	32.243	1328.42	57.5	196.05	70.4082	177.31	51.1111	270.631	58.4746	231.6	66.3462	198.65	57.5	202.04	48.9362	237.867	61.0619	193.14			68.3168	197	64.486	223.49	56.5574	204.55	50	382.8	43.125	400.26	62.1622	184.02	48.9362	252.75	71.134	298.08	68.3168	208.98	63.8889	180.63	63.3028	200.309	51.8797
7.7	64.8148	226.15	34.8259	506.41	60.3448	193.65	32.7103	1253.16	58.3333	189.84	71.4286	166.36	51.8519	256.913	59.322	218.78	67.3077	180.18	58.3333	198.79	49.6454	217.73	61.9469	198.8			69.3069	203.38	65.4206	227.04	57.377	204.97	50.7246	351.23	43.75	341.34	63.0631	185.39	49.6454	260.67	72.1649	289.17	69.3069	204.35	64.8148	181.68	64.2202	194.681	52.6316
7.81	65.7407	219.87	35.3234	408.99	61.2069	188.75	33.1776	1196.01	59.1667	186.25	72.449	168.69	52.5926	262.473	60.1695	223.55	68.2692	178.62	59.1667	212.74	50.3546	228.43	62.8319	198.16			70.297	197.85	66.3551	223.8	58.1967	196.58	51.4493	334.22	44.375	309.86	63.964	177.45	50.3546	282.02	73.1959	302.52	70.297	200.03	65.7407	181.57	65.1376	196.301	53.3835
7.92	66.6667	218.52	35.8209	360.41	62.069	189.68	33.6449	1128.21	60	183.22	73.4694	185.62	53.3333	245.101	61.0169	227.72	69.2308	179.02	60	193.82	51.0638	222.41	63.7168	186.62			71.2871	197.77	67.2897	234.5	59.0164	200.3	52.1739	305.7	45	314.02	64.8649	182.22	51.0638	294.01	74.2268	309.9	71.2871	200.34	66.6667	189.1	66.055	187.278	54.1353
8.03	67.5926	217.53	36.3184	336.96	62.931	188.08	34.1121	1038.55	60.8333	184.07	74.4898	175.74	54.0741	257.005	61.8644	224.09	70.1923	173.44	60.8333	187.33	51.773	209.253	64.6018	183.34			72.2772	197.03	68.2243	233.57	59.8361	192.4	52.8986	283.69	45.625	299.42	65.7658	187.91	51.773	294.27	75.2577	300.83	72.2772	196.22	67.5926	184.45	66.9725	189.297	54.8872
8.14	68.5185	226.25	36.8159	312.69	63.7931	181.02	34.5794	963.72	61.6667	191.73	75.5102	177.34	54.8148	235.568	62.7119	208.49	71.1538	173.99	61.6667	192.1	52.4823	205.583	65.4867	185.086			73.2673	195.36	69.1589	244.81	60.6557	196.85	53.6232	267.19	46.25	292.91	66.6667	183.86	52.4823	290.51	76.2887	302.17	73.2673	199.01	68.5185	172.18	67.8899	201.383	55.6391
8.25	69.4444	219.78	37.3134	307.23	64.6552	193.68	35.0467	877.85	62.5	188.99	76.5306	167.07	55.5556	239.406	63.5593	198.26	72.1154	177.08	62.5	195.54	53.1915	206.972	66.3717	190.518			74.2574	191.43	70.0935	260.4	61.4754	189.54	54.3478	259.71	46.875	276.94	67.5676	182.44	53.1915	292.38	77.3196	305.59	74.2574	204.65	69.4444	177.94	68.8073	195.316	56.391
8.36	70.3704	211.36	37.8109	287.43	65.5172	181.94	35.514	784.7	63.3333	183.61	77.551	169.17	56.2963	232.322	64.4068	194.68	73.0769	174.96	63.3333	202	53.9007	200.537	67.2566	187.152			75.2475	185.5	71.028	264.56	62.2951	190.43	55.0725	257.36	47.5	256.69	68.4685	182.68	53.9007	306.31	78.3505	286.11	75.2475	209.13	70.3704	178.13	69.7248	186.99	57.1429
8.47	71.2963	213.77	38.3085	260.2	66.3793	182.21	35.9813	698.63	64.1667	185.26	78.5714	173.05	57.037	231.896	65.2542	197.43	74.0385	170.91	64.1667	191.8	54.6099	204.116	68.1416	182.144			76.2376	183.52	71.9626	256.64	63.1148	196.21	55.7971	247.74	48.125	250.12	69.3694	182.42	54.6099	291.79	79.3814	289.1	76.2376	222.02	71.2963	176.42	70.6422	182.755	57.8947
8.58	72.2222	233.52	38.806	245.77	67.2414	183.43	36.4486	606.88	65	184.11	79.5918	175.03	57.7778	224.952	66.1017	189.11	75	167.21	65	186.28	55.3191	200.89	69.0265	189.163			77.2277	186.05	72.8972	245.36	63.9344	188.9	56.5217	250.06	48.75	243.63	70.2703	189.34	55.3191	326.24	80.4124	286.05	77.2277	203.38	72.2222	174.6	71.5596	170.666	58.6466
8.69	73.1481	241.73	39.3035	252.52	68.1034	181.77	36.9159	529.7	65.8333	187.71	80.6122	186.35	58.5185	223.245	66.9492	187.62	75.9615	166.16	65.8333	193.74	56.0284	189.857	69.9115	192.704			78.2178	189.58	73.8318	246.82	64.7541	179.58	57.2464	244.35	49.375	236.82	71.1712	181.9	56.0284	331.69	81.4433	295.32	78.2178	194.65	73.1481	174.77	72.4771	184.036	59.3985
8.8	74.0741	243.47	39.801	230.84	68.9655	181.9	37.3832	478.18	66.6667	183.22	81.6327	175.18	59.2593	213.776	67.7966	189.22	76.9231	166.63	66.6667	178.68	56.7376	193.759	70.7965	186.693			79.2079	188.74	74.7664	243.38	65.5738	181.53	57.971	242.68	50	228.64	72.0721	181.41	56.7376	318.5	82.4742	303.22	79.2079	194.17	74.0741	171.95	73.3945	180.411	60.1504
8.91	75	233.96	40.2985	234.83	69.8276	179.22	37.8505	405.88	67.5	172.48	82.6531	179.19	60	208.846	68.6441	191.15	77.8846	179.91	67.5	185.29	57.4468	192.258	71.6814	183.39			80.198	197.91	75.7009	254.79	66.3934	188.27	58.6957	225.01	50.625	221.26	72.973	170.79	57.4468	313.29	83.5052	277.78	80.198	186.21	75	167.93	74.3119	177.583	60.9023
9.02	75.9259	223.15	40.796	231.2	70.6897	183.06	38.3178	338.79	68.3333	178.13	83.6735	173.28	60.7407	205.698	69.4915	180.3	78.8462	174.28	68.3333	187.56	58.156	187.324	72.5664	195.755			81.1881	200.94	76.6355	234.26	67.2131	180.84	59.4203	220.34	51.25	219.47	73.8739	175.26	58.156	332.97	84.5361	286.5	81.1881	170.48	75.9259	170.77	75.2294	179.916	61.6541
9.13	76.8519	217.98	41.2935	222.89	71.5517	178.87	38.785	293.78	69.1667	175.57	84.6939	178.76	61.4815	200.124	70.339	176.98	79.8077	178.04	69.1667	181.88	58.8652	189.781	73.4513	184.631			82.1782	192.33	77.5701	244.75	68.0328	189.12	60.1449	218.77	51.875	220.74	74.7748	176.41	58.8652	341.17	85.567	278.93	82.1782	190.21	76.8519	170.77	76.1468	176.651	62.406
9.24	77.7778	208.75	41.791	215.04	72.4138	178.27	39.2523	277.73	70	175.44	85.7143	176.47	62.2222	203.086	71.1864	176.03	80.7692	173.12	70	189.82	59.5745	186.364	74.3363	190.091			83.1683	194.72	78.5047	241.13	68.8525	193	60.8696	214.69	52.5	216.95	75.6757	180.34	59.5745	355.54	86.5979	295.76	83.1683	188	77.7778	177.72	77.0642	172.618	63.1579
9.35	78.7037	188	42.2886	201.37	73.2759	179.64	39.7196	266.9	70.8333	180.57	86.7347	180.33	62.963	200.259	72.0339	184.81	81.7308	168.71	70.8333	177.42	60.2837	182.16	75.2212	185.426			84.1584	200.48	79.4393	236.32	69.6721	200.76	61.5942	220.49	53.125	215.93	76.5766	174.91	60.2837	353.13	87.6289	275.29	84.1584	196.81	78.7037	182.57	77.9817	171.571	63.9098
9.46	79.6296	189.87	42.7861	205.33	74.1379	171.04	40.1869	250.76	71.6667	176.03	87.7551	169	63.7037	203.03	72.8814	170.6	82.6923	176.59	71.6667	177.25	60.9929	178.41	76.1062	190.518			85.1485	197.23	80.3738	226.27	70.4918	190.29	62.3188	212.47	53.75	214.02	77.4775	179.09	60.9929	348.92	88.6598	283.97	85.1485	186.83	79.6296	185.59	78.8991	170.443	64.6617
9.57	80.5556	200.19	43.2836	204.99	75	179.91	40.6542	242.89	72.5	173.95	88.7755	178.88	64.4444	199.457	73.7288	180.48	83.6538	174.92	72.5	179.59	61.7021	178.639	76.9912	189.029			86.1386	205.25	81.3084	234.04	71.3115	186.97	63.0435	197.45	54.375	207.2	78.3784	186.33	61.7021	348.12	89.6907	283.49	86.1386	190.86	80.5556	178.51	79.8165	174.995	65.4135
9.68	81.4815	202.96	43.7811	209.38	75.8621	178.06	41.1215	238.06	73.3333	169.42	89.7959	175.29	65.1852	198.395	74.5763	173.79	84.6154	183.47	73.3333	169.84	62.4113	179.035	77.8761	190.376			87.1287	212.01	82.243	235.46	72.1311	197.35	63.7681	198.43	55	211.62	79.2793	188.47	62.4113	352.67	90.7216	279.37	87.1287	187.25	81.4815	176.97	80.7339	171.459	66.1654
9.79	82.4074	198.18	44.2786	201.95	76.7241	169.16	41.5888	225.65	74.1667	162.78	90.8163	180.25	65.9259	201.716	75.4237	173.75	85.5769	184.01	74.1667	175.59	63.1206	183.623	78.7611	185.668			88.1188	209.49	83.1776	232.83	72.9508	179	64.4928	203.2	55.625	204.06	80.1802	182.25	63.1206	356.44	91.7526	265.06	88.1188	188.32	82.4074	180.37	81.6514	171.37	66.9173
9.9	83.3333	192.69	44.7761	191.41	77.5862	166.51	42.0561	221.28	75	177.7	91.8367	183.87	66.6667	200.687	76.2712	176.31	86.5385	180.97	75	178.28	63.8298	189.236	79.646	183.024			89.1089	217.48	84.1121	238.86	73.7705	183.43	65.2174	188.96	56.25	195.38	81.0811	179.55	63.8298	329.06	92.7835	254.67	89.1089	182.28	83.3333	173.9	82.5688	168.579	67.6692
10.01	84.2593	189.52	45.2736	192.9	78.4483	179.58	42.5234	209.1	75.8333	165.58	92.8571	173.86	67.4074	201.725	77.1186	173.74	87.5	176.2	75.8333	171.91	64.539	183.248	80.531	181.978			90.099	219.89	85.0467	222.84	74.5902	177.31	65.942	188.45	56.875	196.05	81.982	180.71	64.539	317.61	93.8144	259.55	90.099	180.34	84.2593	172.82	83.4862	166.946	68.4211
10.12	85.1852	190.2	45.7711	192.2	79.3103	177.13	42.9907	203.39	76.6667	165.34	93.8776	166.66	68.1481	208.156	77.9661	169.72	88.4615	175.8	76.6667	174.31	65.2482	182.661	81.4159	184.894			91.0891	209.74	85.9813	214.34	75.4098	177.95	66.6667	193.01	57.5	196.2	82.8829	188.24	65.2482	315.7	94.8454	258.56	91.0891	183.3	85.1852	184.53	84.4037	167.119	69.1729
10.23	86.1111	194.7	46.2687	188.28	80.1724	173.38	43.4579	204.21	77.5	168.27	94.898	168.48	68.8889	205.884	78.8136	167.35	89.4231	165.43	77.5	179.62	65.9574	181.153	82.3009	174.784			92.0792	214.95	86.9159	224.43	76.2295	176.92	67.3913	200.24	58.125	192.49	83.7838	192.39	65.9574	307.33	95.8763	259.83	92.0792	188.65	86.1111	191.15	85.3211	162.077	69.9248
10.34	87.037	194.58	46.7662	191.24	81.0345	175.42	43.9252	201.14	78.3333	161.65	95.9184	170.91	69.6296	200.815	79.661	168.42	90.3846	174.61	78.3333	172.69	66.6667	178.902	83.1858	175.652			93.0693	202.39	87.8505	218.7	77.0492	175.42	68.1159	196.75	58.75	189.1	84.6847	202.28	66.6667	322.13	96.9072	250.99	93.0693	188.97	87.037	181.17	86.2385	160.015	70.6767
10.45	87.963	183.76	47.2637	190.38	81.8966	169.38	44.3925	194.34	79.1667	170.78	96.9388	172.04	70.3704	206.232	80.5085	165.28	91.3462	170.77	79.1667	168.87	67.3759	174.756	84.0708	176.538			94.0594	214.51	88.785	217.11	77.8689	174.76	68.8406	187.9	59.375	186.94	85.5856	208.43	67.3759	315.25	97.9381	241.39	94.0594	173.31	87.963	177.13	87.156	162.088	71.4286
10.56	88.8889	182.89	47.7612	190.62	82.7586	171.11	44.8598	191.93	80	171.71	97.9592	174.92	71.1111	204.583	81.3559	173.75	92.3077	168.21	80	174.53	68.0851	172.638	84.9558	184.617			95.0495	208.98	89.7196	217.81	78.6885	179.55	69.5652	191.55	60	186.64	86.4865	197.43	68.0851	310	98.9691	242.67	95.0495	177.21	88.8889	171.49	88.0734	158.73	72.1805
10.67	89.8148	180.49	48.2587	191.52	83.6207	171.2	45.3271	191.42	80.8333	165.54	98.9796	177.36	71.8519	209.31	82.2034	166.52	93.2692	171.22	80.8333	172.98	68.7943	171.138	85.8407	176.313			96.0396	215.38	90.6542	207.72	79.5082	177.52	70.2899	187.59	60.625	187.35	87.3874	197.59	68.7943	307.26	100	238.58	96.0396	169.81	89.8148	168.43	88.9908	160.71	72.9323
10.78	90.7407	175.58	48.7562	191.72	84.4828	172.46	45.7944	181.53	81.6667	159.19	100	172.2	72.5926	213.21	83.0508	168.3	94.2308	166.35	81.6667	169.73	69.5035	171.02	86.7257	178.971			97.0297	210.75	91.5888	208.07	80.3279	173.51	71.0145	193.62	61.25	189.29	88.2883	202.99	69.5035	326.08			97.0297	178.49	90.7407	172.66	89.9083	165.743	73.6842
10.89	91.6667	179.1	49.2537	192.94	85.3448	182	46.2617	185.13	82.5	163.09	101.02		73.3333	203.185	83.8983	172.23	95.1923	164.15	82.5	173.31	70.2128	178.59	87.6106	177.198			98.0198	216.94	92.5234	200.5	81.1475	179.14	71.7391	185.08	61.875	191.19	89.1892	206.94	70.2128	333.51			98.0198	175.62	91.6667	170.98	90.8257	159.09	74.4361
11	92.5926	179.02	49.7512	197.58	86.2069	173.94	46.729	185.19	83.3333	168.01			74.0741	198.079	84.7458	171.86	96.1538	161.25	83.3333	161.89	70.922	178.756	88.4956	179.655			99.0099	230.04	93.4579	206.46	81.9672	186.11	72.4638	182.79	62.5	189.76	90.0901	203.51	70.922	335.95			99.0099	181.24	92.5926	170.77	91.7431	158.101	75.188
11.11	93.5185	177.43	50.2488	194.66	87.069	168.89	47.1963	185.83	84.1667	171.62			74.8148	210.853	85.5932	177.3	97.1154	159.88	84.1667	173.21	71.6312	170.95	89.3805	181.562			100	230.51	94.3925	213.89	82.7869	172.61	73.1884	180.43	63.125	178.46	90.991	203.29	71.6312	341.41			100	177.49	93.5185	167.62	92.6606	164.567	75.9398
11.22	94.4444	179.24	50.7463	195.58	87.931	168.83	47.6636	181.12	85	173.2			75.5556	199.134	86.4407	174.88	98.0769	163.76	85	171.8	72.3404	173.823	90.2655	179.576					95.3271	210.64	83.6066	173.52	73.913	181.47	63.75	179.41	91.8919	201.52	72.3404	359.64					94.4444	166.04	93.578	166.119	76.6917
11.33	95.3704	175.7	51.2438	191.14	88.7931	170.28	48.1308	180.43	85.8333	174.7			76.2963	199.154	87.2881	173.28	99.0385	164.07	85.8333	176.97	73.0496	177.253	91.1504	181.36					96.2617	204.85	84.4262	177.96	74.6377	180.29	64.375	184.43	92.7928	193.69	73.0496	356.64					95.3704	169.78	94.4954	166.724	77.4436
11.44	96.2963	174.62	51.7413	191.1	89.6552	165.44	48.5981	181.62	86.6667	167.97			77.037	200.466	88.1356	176.9	100	158.66	86.6667	185.18	73.7589	178.326	92.0354	181.222					97.1963	200.65	85.2459	178.64	75.3623	184.69	65	183.73	93.6937	194.72	73.7589	376.75					96.2963	172.89	95.4128	167.747	78.1955
11.55	97.2222	175.7	52.2388	184.58	90.5172	169.07	49.0654	178.26	87.5	172.42			77.7778	199.747	88.9831	173.23			87.5	172.24	74.4681	176.77	92.9204	185.493					98.1308	196.89	86.0656	178.27	76.087	179.84	65.625	197.75	94.5946	191.87	74.4681	346.51					97.2222	173.25	96.3303	169.032	78.9474
11.66	98.1481	175.99	52.7363	181.28	91.3793	172.36	49.5327	181.55	88.3333	177.14			78.5185	205.487	89.8305	188.01			88.3333	166.38	75.1773	175.199	93.8053	187.729					99.0654	200.55	86.8852	168.33	76.8116	186.94	66.25	193.52	95.4955	195.77	75.1773	371					98.1481	164.05	97.2477	172.329	79.6992
11.77	99.0741	178.57	53.2338	181.85	92.2414	172.77	50	178.67	89.1667	176.05			79.2593	202.193	90.678	185.67			89.1667	175.85	75.8865	169.845	94.6903	181.32					100	212.27	87.7049	176.87	77.5362	191.88	66.875	186.39	96.3964	190.42	75.8865	366.42					99.0741	161.86	98.1651	179.177	80.4511
11.88	100	191.17	53.7313	176.22	93.1034	174.98	50.4673	173.04	90	173.1			80	205.479	91.5254	183.45			90	177.52	76.5957	170.06	95.5752	181.447							88.5246	172.21	78.2609	187.66	67.5	180.66	97.2973	206.52	76.5957	343.59					100	163.24	99.0826	186.181	81.203
11.99			54.2289	177.61	93.9655	171.16	50.9346	172.02	90.8333	186.52			80.7407	208.254	92.3729	171.99			90.8333	175.11	77.305	177.593	96.4602	179.495							89.3443	180.11	78.9855	183.04	68.125	181.91	98.1982	194.9	77.305	369.8							100	182.691	81.9549
12.1			54.7264	178.21	94.8276	169.51	51.4019	171.5	91.6667	174.09			81.4815	214.018	93.2203	178.27			91.6667	182.52	78.0142	180.614	97.3451	177.418							90.1639	180.26	79.7101	182.85	68.75	188	99.0991	195.52	78.0142	354.79									82.7068
12.21			55.2239	183.34	95.6897	172.28	51.8692	167.01	92.5	172.69			82.2222	219.51	94.0678	169.21			92.5	180.3	78.7234	177.202	98.2301	179.779							90.9836	178.68	80.4348	183.54	69.375	179.76	100	188.52	78.7234	383.03									83.4586
12.32			55.7214	184.66	96.5517	170.87	52.3364	162.11	93.3333	169.23			82.963	218.397	94.9153	169.03			93.3333	173.63	79.4326	184.343	99.115	177.126							91.8033	185.9	81.1594	182.12	70	184.7			79.4326	353.12									84.2105
12.43			56.2189	181.06	97.4138	171.17	52.8037	165.08	94.1667	168.28			83.7037	212.393	95.7627	164.95			94.1667	180.27	80.1418	187.47	100	177.144							92.623	179.01	81.8841	182.93	70.625	180.09			80.1418	349.89									84.9624
12.54			56.7164	174.05	98.2759	178.04	53.271	170.79	95	167.46			84.4444	188.09	96.6102	165.54			95	179.34	80.8511	183.499									93.4426	177.55	82.6087	184.59	71.25	179.44			80.8511	364.86									85.7143
12.65			57.2139	179.27	99.1379	176.59	53.7383	170.53	95.8333	166.31			85.1852	191.421	97.4576	172.04			95.8333	169.66	81.5603	184.571									94.2623	176.17	83.3333	189.79	71.875	175.24			81.5603	358.67									86.4662
12.76			57.7114	180.51	100	176.72	54.2056	167.45	96.6667	170.96			85.9259	183.266	98.3051	172.28			96.6667	181.12	82.2695	184.061									95.082	176.69	84.058	192.66	72.5	173.9			82.2695	352.06									87.218
12.87			58.209	180.48			54.6729	168.55	97.5	175.16			86.6667	176.997	99.1525	170.72			97.5	179.22	82.9787	188.629									95.9016	178.76	84.7826	182.17	73.125	173.43			82.9787	351.34									87.9699
12.98			58.7065	178.5			55.1402	170.58	98.3333	170.43			87.4074	183.46	100	171.92			98.3333	189.97	83.6879	195.405									96.7213	177.3	85.5072	178.36	73.75	167.4			83.6879	360.63									88.7218
13.09			59.204	182.12			55.6075	170.84	99.1667	187.74			88.1481	176.45					99.1667	189.25	84.3972	187.534									97.541	180.96	86.2319	177.59	74.375	171.73			84.3972	357.01									89.4737
13.2			59.7015	178.9			56.0748	166.03	100	178.59			88.8889	180.872					100	189.19	85.1064	177.415									98.3607	174.7	86.9565	181.69	75	180.81			85.1064	361.29									90.2256
13.31			60.199	175.14			56.5421	167.02					89.6296	176.691							85.8156	170.784									99.1803	168.28	87.6812	182.69	75.625	184.84			85.8156	358.67									90.9774
13.42			60.6965	175.66			57.0093	166.17					90.3704	172.504							86.5248	166.533									100	165.51	88.4058	177.23	76.25	193.49			86.5248	354.92									91.7293
13.53			61.194	176.21			57.4766	163.22					91.1111	169.611							87.234	167.094											89.1304	184.32	76.875	202.97			87.234	377.13									92.4812
13.64			61.6915	179.42			57.9439	164.92					91.8519	175.549							87.9433	168.089											89.8551	173.43	77.5	188.66			87.9433	369.32									93.2331
13.75			62.1891	178.79			58.4112	172.02					92.5926	168.39							88.6525	162.289											90.5797	175.88	78.125	181.16			88.6525	352.44									93.985
13.86			62.6866	174.33			58.8785	167.08					93.3333	170.735							89.3617	162.949											91.3043	175.17	78.75	173.32			89.3617	368.46									94.7368
13.97			63.1841	170.6			59.3458	166.03					94.0741	170.556							90.0709	169.878											92.029	181.72	79.375	177.11			90.0709	341.81									95.4887
14.08			63.6816	175.6			59.8131	164.36					94.8148	163.202							90.7801	179.197											92.7536	183.38	80	191.92			90.7801	321.98									96.2406
14.19			64.1791	180.93			60.2804	170.59					95.5556	166.759							91.4894	177.228											93.4783	189.67	80.625	177.09			91.4894	322.55									96.9925
14.3			64.6766	178.5			60.7477	161.76					96.2963	165.052							92.1986	164.702											94.2029	182.31	81.25	174.38			92.1986	316.14									97.7444
14.41			65.1741	183.32			61.215	161.33					97.037	160.587							92.9078	162.772											94.9275	191.27	81.875	178.68			92.9078	329.4									98.4962
14.52			65.6716	176.65			61.6822	161.65					97.7778	159.291							93.617	161.88											95.6522	182.99	82.5	176.47			93.617	323.72									99.2481
14.63			66.1692	172.64			62.1495	161.27					98.5185	167.663							94.3262	160.803											96.3768	184.86	83.125	176.93			94.3262	334.07									100
14.74			66.6667	166.66			62.6168	160.39					99.2593	172.751							95.0355	166.577											97.1014	185.11	83.75	176.32			95.0355	322.83
14.85			67.1642	171.2			63.0841	159.5					100	168.315							95.7447	166.04											97.8261	179.37	84.375	173.71			95.7447	324.23
14.96			67.6617	173.94			63.5514	164.4													96.4539	155.327											98.5507	172.93	85	170.03			96.4539	307.39
15.07			68.1592	166.57			64.0187	163													97.1631	150.528											99.2754	176.44	85.625	166.28			97.1631	316.56
15.18			68.6567	174.37			64.486	159.21													97.8723	153.395											100	185.65	86.25	169.66			97.8723	306.44
15.29			69.1542	166.43			64.9533	160.96													98.5816	157.249													86.875	172.58			98.5816	319.61
15.4			69.6517	163.83			65.4206	164.97													99.2908	168.32													87.5	165.83			99.2908	303.98
15.51			70.1493	166.64			65.8879	158.76													100	166.562													88.125	165.17			100	268.38
15.62			70.6468	159.08			66.3551	163.86																											88.75	168.86
15.73			71.1443	170.51			66.8224	161.95																											89.375	166.32
15.84			71.6418	172.99			67.2897	162.86																											90	168.07
15.95			72.1393	166.54			67.757	156.82																											90.625	164.9
16.06			72.6368	164.85			68.2243	164.55																											91.25	162.61
16.17			73.1343	167.88			68.6916	170.29																											91.875	165.52
16.28			73.6318	166.18			69.1589	172.3																											92.5	172.22
16.39			74.1294	169.93			69.6262	162.69																											93.125	164.55
16.5			74.6269	171.99			70.0935	160.13																											93.75	172.99
16.61			75.1244	167.16			70.5607	161.45																											94.375	165.85
16.72			75.6219	159.84			71.028	173.93																											95	170.25
16.83			76.1194	169.88			71.4953	161.81																											95.625	172.7
16.94			76.6169	169.91			71.9626	161.46																											96.25	170.69
17.05			77.1144	167.43			72.4299	169.15																											96.875	167.75
17.16			77.6119	169.28			72.8972	166.13																											97.5	167.42
17.27			78.1095	169.26			73.3645	169.58																											98.125	173.93
17.38			78.607	167.75			73.8318	175.37																											98.75	172.84
17.49			79.1045	169.93			74.2991	164																											99.375	171.4
17.6			79.602	167.41			74.7664	167.14																											100	176.16
17.71			80.0995	168.3			75.2336	170.7
17.82			80.597	171.64			75.7009	166.35
17.93			81.0945	168.28			76.1682	163.06
18.04			81.592	166.36			76.6355	163.79
18.15			82.0896	167.63			77.1028	171.41
18.26			82.5871	168.59			77.5701	174.06
18.37			83.0846	161.79			78.0374	173.47
18.48			83.5821	164.2			78.5047	177.97
18.59			84.0796	167.56			78.972	177.06
18.7			84.5771	170.93			79.4393	172.21
18.81			85.0746	175.69			79.9065	174.56
18.92			85.5721	187.04			80.3738	172.89
19.03			86.0697	178.52			80.8411	172.06
19.14			86.5672	169.42			81.3084	169.26
19.25			87.0647	168.51			81.7757	176.02
19.36			87.5622	162.68			82.243	182
19.47			88.0597	161.81			82.7103	186.9
19.58			88.5572	175.16			83.1776	176.55
19.69			89.0547	166.98			83.6449	173.01
19.8			89.5522	163.01			84.1121	169
19.91			90.0498	166.01			84.5794	166.81
20.02			90.5473	165.25			85.0467	168.4
20.13			91.0448	165.58			85.514	163.44
20.24			91.5423	166.63			85.9813	169.91
20.35			92.0398	166.7			86.4486	178.76
20.46			92.5373	162.74			86.9159	171.52
20.57			93.0348	167.54			87.3832	166.87
20.68			93.5323	165.07			87.8505	168.48
20.79			94.0299	168			88.3178	174.4
20.9			94.5274	166.17			88.785	165.66
21.01			95.0249	167.36			89.2523	163.39
21.12			95.5224	171.24			89.7196	167.27
21.23			96.0199	178.16			90.1869	169.45
21.34			96.5174	175.74			90.6542	167.57
21.45			97.0149	184.15			91.1215	169.87
21.56			97.5124	174.58			91.5888	172.73
21.67			98.01	163.89			92.0561	167
21.78			98.5075	168.43			92.5234	170.38
21.89			99.005	165.28			92.9907	166.96
22			99.5025	167.01			93.4579	164.78
22.11			100	166.71			93.9252	167.09
22.22							94.3925	165.45
22.33							94.8598	160.9
22.44							95.3271	170.81
22.55							95.7944	172.65
22.66							96.2617	167.28
22.77							96.729	166.65
22.88							97.1963	167.96
22.99							97.6636	166.36
23.1							98.1308	168.69
23.21							98.5981	170.3
23.32							99.0654	164.39
23.43							99.5327	164.62
23.54							100	162.87
	0		0		0		0		0		0		0		0		0		0		0		0		0		0		0		0		0		0		0		0		0		0		0		0		0
	2.5	218.107	2.5	192.95	2.5	203.647	2.5	171.685	2.5	191.965	2.5	198.46	2.5	177.853	2.5	186.447	2.5	194.3	2.5	189.472	2.5	177.835	2.5	192.654	2.5	203.205	2.5	205.313	2.5	194.14	2.5	208.423	2.5	203.165	2.5	197.978	2.5	210.727	2.5	226.5	2.5	210.01	2.5	261.937	2.5	182.1	2.5	185.822	2.5
	5	208.307	5	184.012	5	221.18	5	170.37	5	178.637	5	195.255	5	180.936	5	183.143	5	189.283	5	191.48	5	177.548	5	193.664	5	209.605	5	201.8	5	211.22	5	239.46	5	204.633	5	187.158	5	223.76	5	230.25	5	206.01	5	271.473	5	190.353	5	188.243	5
	7.5	211.527	7.5	192.956	7.5	209.557	7.5	189.522	7.5	178.988	7.5	209.167	7.5	171.227	7.5	192.26	7.5	199.825	7.5	194.195	7.5	181.017	7.5	201.38	7.5	227.67	7.5	220.01	7.5	219.893	7.5	227.503	7.5	207.768	7.5	190.674	7.5	255.473	7.5	238	7.5	211.083	7.5	276.695	7.5	197.39	7.5	183.699	7.5
	10	215.99	10	198.58	10	203.55	10	183.136	10	187.085	10	217.085	10	177.026	10	230.4	10	200.66	10	196.423	10	181.143	10	205.5	10	221.39	10	218.133	10	220.99	10	207.637	10	201.893	10	190.34	10	329.473	10	253.035	10	210.125	10	279.687	10	195.475	10	183.78	10
	12.5	233.277	12.5	206.086	12.5	226.377	12.5	182.092	12.5	198.062	12.5	224.84	12.5	178.788	12.5	198.463	12.5	211.937	12.5	209.165	12.5	179.186	12.5	215.458	12.5	233.585	12.5	224.46	12.5	218.527	12.5	213.503	12.5	210.96	12.5	192.766	12.5	514.745	12.5	273.953	12.5	213.757	12.5	293.91	12.5	206.14	12.5	197.302	12.5
	15	255.467	15	243.432	15	243.227	15	190.495	15	202.343	15	217.08	15	180.434	15	197.193	15	219.49	15	223.21	15	191.394	15	236.396	15	250.595	15	230	15	230.237	15	226.783	15	217.703	15	203.314	15	710.543	15	323.073	15	236.56	15	307.863	15	212.603	15	197.139	15
	17.5	272.09	17.5	343.812	17.5	240.83	17.5	205.252	17.5	212.097	17.5	231.087	17.5	189.913	17.5	200.873	17.5	239.147	17.5	233.49	17.5	191.475	17.5	261.023	17.5	321.645	17.5	248.885	17.5	234.525	17.5	253.207	17.5	215.963	17.5	218.324	17.5	1283.76	17.5	422.523	17.5	242.5	17.5	320.12	17.5	214.405	17.5	217.036	17.5
	20	336.363	20	318.566	20	250.09	20	234.946	20	215.672	20	281.71	20	200.111	20	203.823	20	278.14	20	255.14	20	211.919	20	277.314	20	357.71	20	272.25	20	244.367	20	302.41	20	228.337	20	238.46	20	1781.39	20	804.613	20	270.69	20	380.037	20	223.017	20	253.6	20
	22.5	409.18	22.5	433.96	22.5	310	22.5	413.72	22.5	230.308	22.5	332.113	22.5	212.788	22.5	223.157	22.5	359.287	22.5	302.727	22.5	241.56	22.5	307.954	22.5	427.9	22.5	316.425	22.5	261.217	22.5	366.72	22.5	246.007	22.5	275.04	22.5	1867.9	22.5	1325.71	22.5	334.45	22.5	516.195	22.5	239.377	22.5	268.703	22.5
	25	457.023	25	1098.85	25	471.71	25	841.022	25	269.77	25	440.515	25	233.349	25	244.783	25	588.95	25	473.212	25	253.457	25	372.063	25	603.13	25	410.967	25	275.155	25	554.76	25	265.587	25	436.078	25	1735.84	25	1459.12	25	451.737	25	812.333	25	283.72	25	354.874	25
	27.5	497.083	27.5	2083.11	27.5	623.75	27.5	1467.86	27.5	395.897	27.5	537.08	27.5	291.463	27.5	262.073	27.5	852.943	27.5	986.395	27.5	292.546	27.5	395.502	27.5	690.02	27.5	546.655	27.5	295.14	27.5	1208.4	27.5	315.023	27.5	876.826	27.5	1641.43	27.5	1402.83	27.5	631.545	27.5	1196.03	27.5	350.733	27.5	493.249	27.5
	30	663.26	30	2081.96	30	947.3	30	1561.24	30	686.087	30	727.17	30	453.538	30	272.39	30	1380.4	30	1535.06	30	388.512	30	386.764	30	862.14	30	782.18	30	369.093	30	1527.32	30	556.15	30	1390.5	30	1022.5	30	1491.54	30	916.237	30	1688.06	30	605.783	30	712.429	30
	32.5	1066.54	32.5	1664.71	32.5	1368.42	32.5	1411.67	32.5	1101.73	32.5	962.405	32.5	649.176	32.5	341.727	32.5	1666.67	32.5	1785.24	32.5	670.537	32.5	419.527	32.5	966.18	32.5	1154.99	32.5	490.045	32.5	1402.98	32.5	827.347	32.5	1739.76	32.5	576.353	32.5	1079.64	32.5	1396.12	32.5	1991.51	32.5	1052.49	32.5	853.566	32.5
	35	1471.99	35	845.41	35	1616.27	35	1115.93	35	1420.78	35	1160.24	35	864.938	35	487.19	35	1666.51	35	1813.78	35	947.805	35	515.429	35	1096.06	35	1349.32	35	715.567	35	1517.37	35	965.315	35	1990.55	35	386.895	35	587.428	35	1843.89	35	2027.83	35	1365.42	35	1006.39	35
	37.5	1585.04	37.5	345.256	37.5	1243.44	37.5	662.657	37.5	1530.66	37.5	1266.46	37.5	865.623	37.5	824.577	37.5	1369.84	37.5	1467.45	37.5	1116.54	37.5	722.216	37.5	1339.66	37.5	1256.7	37.5	1155.59	37.5	1265.52	37.5	1202.67	37.5	1651.08	37.5	293.66	37.5	361.047	37.5	2138.64	37.5	1878.08	37.5	1497.97	37.5	932.712	37.5
	40	1414.43	40	255.352	40	902.067	40	316.616	40	1453.7	40	1177.82	40	1030.71	40	1189.21	40	1145.82	40	790.298	40	966.02	40	893.976	40	1458.12	40	1048.15	40	1453.21	40	718.477	40	1439.48	40	1117.95	40	250.367	40	297.44	40	2230.61	40	1309.2	40	1584.85	40	826.247	40
	42.5	1139.86	42.5	221.066	42.5	538.467	42.5	235.728	42.5	1141.18	42.5	864.21	42.5	1088.43	42.5	1368.95	42.5	692.583	42.5	436.232	42.5	603.095	42.5	794.59	42.5	1510.82	42.5	792.525	42.5	1429.02	42.5	419.183	42.5	1514.14	42.5	589.376	42.5	232.823	42.5	274.913	42.5	1761.96	42.5	718.765	42.5	1600.2	42.5	732.011	42.5
	45	873.997	45	202.612	45	325.38	45	200.685	45	808.628	45	585.237	45	738.028	45	1147.28	45	396.07	45	326.082	45	418.661	45	829.751	45	1570.56	45	541	45	1172.45	45	312.823	45	965.557	45	357.076	45	205.005	45	264.23	45	1091.15	45	431.363	45	1288.66	45	574.322	45
	47.5	633.353	47.5	191	47.5	264.52	47.5	185.82	47.5	515.102	47.5	393.24	47.5	386.291	47.5	903.317	47.5	286.79	47.5	280.645	47.5	304.085	47.5	766.41	47.5	1519.36	47.5	357.87	47.5	1007.52	47.5	272.15	47.5	628.16	47.5	287.996	47.5	194.163	47.5	262.167	47.5	717.357	47.5	325.995	47.5	769.49	47.5	423.534	47.5
	50	503.157	50	192.876	50	261.397	50	180.275	50	332.743	50	269.26	50	283.537	50	601.98	50	234.23	50	254.803	50	241.899	50	654.422	50	1244.55	50	282.407	50	675.383	50	235.335	50	452.027	50	243.18	50	203.13	50	260.202	50	495.475	50	299.537	50	414.387	50	296.338	50
	52.5	467.457	52.5	191.412	52.5	236.687	52.5	170.725	52.5	252.213	52.5	227.023	52.5	265.022	52.5	446.843	52.5	224.607	52.5	240.005	52.5	216.419	52.5	530.279	52.5	1111.81	52.5	243.687	52.5	378.383	52.5	220.59	52.5	343.488	52.5	221.412	52.5	209.763	52.5	290.202	52.5	376.065	52.5	285.777	52.5	294.263	52.5	229.918	52.5
	55	386.553	55	179.034	55	215.427	55	168.48	55	217.167	55	208.14	55	250.037	55	306.117	55	212.493	55	215.977	55	203.875	55	326.83	55	950.495	55	238.795	55	294.19	55	209.973	55	270.197	55	213.144	55	197.27	55	296.827	55	338.837	55	272.94	55	233.067	55	209.332	55
	57.5	294.72	57.5	180.476	57.5	222.52	57.5	167.31	57.5	202.678	57.5	203.84	57.5	234.541	57.5	247.307	57.5	197.03	57.5	203.755	57.5	194.191	57.5	237.722	57.5	844.66	57.5	221.173	57.5	265.597	57.5	201.693	57.5	249.878	57.5	200.662	57.5	189.42	57.5	322.43	57.5	327.175	57.5	251.073	57.5	212.61	57.5	202.972	57.5
	60	268.255	60	180.102	60	204.013	60	166.882	60	188.84	60	195.835	60	217.705	60	228.973	60	192.693	60	201.847	60	187.823	60	209.807	60	696.585	60	216.11	60	237.197	60	196.427	60	229.343	60	190.274	60	180.973	60	343.227	60	329.43	60	230.46	60	202.11	60	197.136	60
	62.5	247.807	62.5	177.044	62.5	190.693	62.5	163.32	62.5	187.002	62.5	186.193	62.5	204.439	62.5	225.12	62.5	185.28	62.5	192.197	62.5	179.561	62.5	199.4	62.5	528.315	62.5	214.22	62.5	216.46	62.5	192.273	62.5	216.605	62.5	188.846	62.5	182.637	62.5	350.71	62.5	301.245	62.5	226.683	62.5	195.31	62.5	200.642	62.5
	65	228.423	65	175.992	65	187.593	65	161.243	65	185.493	65	182.08	65	200.915	65	200.477	65	188.42	65	193.905	65	185.369	65	189.373	65	482.5	65	204.255	65	226.167	65	188.23	65	199.693	65	183.158	65	181.687	65	334.37	65	302.74	65	220.83	65	181.47	65	197.495	65
	67.5	219.195	67.5	174.094	67.5	182.527	67.5	162.48	67.5	181.88	67.5	177.593	67.5	200.631	67.5	191.387	67.5	189.677	67.5	185.998	67.5	179.368	67.5	187.585	67.5	382.205	67.5	201.92	67.5	228.447	67.5	183.547	67.5	192.665	67.5	188.41	67.5	185.885	67.5	315.102	67.5	297.52	67.5	217.557	67.5	185.335	67.5	190.959	67.5
	70	221.187	70	169.028	70	180.963	70	165.33	70	175.405	70	177.72	70	204.952	70	186.89	70	178.82	70	186.137	70	171.599	70	188.004	70	355.93	70	200.19	70	239.19	70	194.293	70	192.067	70	183.006	70	182.513	70	314.447	70	299.78	70	206.665	70	178.19	70	194.563	70
	72.5	219.55	72.5	167.152	72.5	180.067	72.5	164.655	72.5	176.498	72.5	170.787	72.5	206.708	72.5	179.273	72.5	174.837	72.5	181.02	72.5	175.53	72.5	185.041	72.5	310.68	72.5	197.55	72.5	260.533	72.5	191.537	72.5	187.27	72.5	178.674	72.5	184.217	72.5	342.628	72.5	301.733	72.5	198.863	72.5	176.383	72.5	179.152	72.5
	75	239.72	75	168.166	75	176.863	75	168.444	75	170.962	75	180.68	75	206.332	75	174.957	75	171.027	75	175.825	75	177.45	75	190.159	75	268.865	75	193.395	75	245.187	75	179.913	75	180.73	75	173.454	75	174.153	75	359.967	75	306.21	75	201.83	75	171.55	75	178.997	75
	77.5	225.03	77.5	166.844	77.5	175.71	77.5	167.062	77.5	169.222	77.5	172.205	77.5	199.585	77.5	174.6	77.5	166.667	77.5	176.03	77.5	173.174	77.5	188.324	77.5	257.455	77.5	185.023	77.5	244.525	77.5	176.763	77.5	183.823	77.5	190.154	77.5	178.113	77.5	362.702	77.5	302.863	77.5	211.51	77.5	169.823	77.5	176.395	77.5
	80	195.54	80	168.726	80	174.407	80	174.888	80	168.103	80	172.417	80	203.227	80	168.497	80	177.41	80	173.928	80	180.72	80	186.356	80	239.77	80	189.16	80	240.733	80	177.277	80	186.357	80	182.434	80	187.4	80	363.647	80	287.605	80	194.41	80	181.96	80	172.336	80
	82.5	200.443	82.5	168.442	82.5	172.727	82.5	174.446	82.5	164.882	82.5	180.765	82.5	211.815	82.5	168.517	82.5	170.915	82.5	172.637	82.5	184.9	82.5	180.552	82.5	223.96	82.5	197.06	82.5	231.923	82.5	179.587	82.5	182.863	82.5	179.708	82.5	180.837	82.5	356.37	82.5	294.863	82.5	182.3	82.5	178.617	82.5	171.415	82.5
	85	191.105	85	166.614	85	171.59	85	174.454	85	168.98	85	177.077	85	206.293	85	170.797	85	178.327	85	170.053	85	190.523	85	178.936	85	228.605	85	197.6	85	235.845	85	174.697	85	187.302	85	174.692	85	194.303	85	356.327	85	282.14	85	192.405	85	173.36	85	167.548	85
	87.5	193.16	87.5	175.836	87.5	174.943	87.5	169.817	87.5	172.072	87.5	178.4	87.5	183.786	87.5	175.153	87.5	180.393	87.5	176.548	87.5	170.457	87.5	177.642	87.5	224.375	87.5	204.83	87.5	220.537	87.5	175.08	87.5	179.213	87.5	168.876	87.5	201.15	87.5	363.003	87.5	287.345	87.5	188.313	87.5	185.617	87.5	161.393	87.5
	90	182.38	90	165.928	90	168.183	90	167.84	90	174.677	90	174.39	90	178.004	90	179.38	90	172.477	90	172.998	90	164.442	90	179.472	90	219.275	90	213.485	90	217.873	90	176.397	90	179.418	90	166.85	90	204.965	90	363.407	90	280.917	90	185.3	90	172.35	90	161.728	90
	92.5	177.34	92.5	166.034	92.5	171.4	92.5	169.324	92.5	176.6	92.5	182.06	92.5	172.555	92.5	180.37	92.5	171.197	92.5	178.863	92.5	172.751	92.5	180.719	92.5	193.1	92.5	214.86	92.5	207.895	92.5	181.613	92.5	177.59	92.5	166.664	92.5	202.773	92.5	325.62	92.5	272.215	92.5	184.097	92.5	171.82	92.5	158.596	92.5
	95	178.563	95	165.904	95	171.883	95	165.927	95	169.415	95	169.667	95	168.221	95	172.17	95	168.785	95	178.385	95	161.818	95	184.847	95	194.02	95	208.45	95	206.95	95	177.577	95	186.657	95	169.172	95	193.427	95	329.063	95	257.593	95	181.14	95	168.143	95	165.803	95
	97.5	175.34	97.5	175.33	97.5	171.44	97.5	169.07	97.5	169.972	97.5	171.475	97.5	164.133	97.5	167.51	97.5	161.76	97.5	177.335	97.5	159.618	97.5	179.453	97.5	199.295	97.5	211.703	97.5	205.38	97.5	177.583	97.5	184.32	97.5	169.762	97.5	197.57	97.5	317.752	97.5	255.41	97.5	175.17	97.5	171.973	97.5	169.703	97.5
	100	181.91	100	167.65	100	177.117	100	166.205	100	177.98	100	174.827	100	167.005	100	171.64	100	162.163	100	186.908	100	161.382	100	178.016	100	185.105	100	225.83	100	203.237	100	172.362	100	178.597	100	172.35	100	192.98	100	299.602	100	240.88	100	178.117	100	163.05	100	182.683	100
[truncated: 13 more columns]

## Sheet: IF Binned
	1	IF	2	IF	4	IF	9	IF	10	IF	11	IF	12	IF	14	IF	16	IF	20	IF	21	IF	22	IF	23	IF	24A	IF	24B	IF	25	IF	26	IF	27	IF	28A	IF	28B	IF	28C	IF	28D	IF	29A	IF	29B	IF	30
X	X	Y	X	Y	X	Y	X	Y	X	Y	X	Y	X	Y	X	Y	X	Y	X	Y	X	Y	X	Y	X	Y	X	Y	X	Y	X	Y	X	Y	X	Y	X	Y	X	Y	X	Y	X	Y	X	Y	X	Y	X
0	0	29408	0	10064	0	13648	0	13760	0	13840	0	30144	0	11904	0	12656	0	12768	0	20576	0	17616	0	41056	0	31520	0	26896	0	28480	0	11104	0	31760	0	15520	0	23792	0	29168	0	25328	0	25040	0	15712	0	9472	0
0.11	0.884956	27915.2	0.529101	11457.4	1.04167	13754.6	0.502513	14293.3	0.847458	13976.6	0.952381	29360.4	0.724638	11602.4	0.892857	12131	0.917431	12889.3	0.990099	20565.8	0.833333	17179.3	1.13636	39923.8	1.36986	31835.4	1.38889	27636.7	1.49254	27161.4	0.909091	11119.8	1.11111	32615	0.684932	15243.8	0.961538	23632	0.813008	28908.9	1.63934	26207.5	1.1236	24341.4	0.909091	15831.3	0.943396	9669.54	0.847458
0.22	1.76991	26442.4	1.0582	11353.5	2.08333	14462.8	1.00503	12023.2	1.69492	13661.2	1.90476	27981.1	1.44928	11789.4	1.78571	12429.2	1.83486	11772.7	1.9802	19436.8	1.66667	17942.5	2.27273	36386.6	2.73973	31419.5	2.77778	26905.5	2.98507	26230.6	1.81818	11386.5	2.22222	32832.4	1.36986	14874	1.92308	23456	1.62602	28664.6	3.27869	24123.5	2.24719	23875.8	1.81818	15692.1	1.88679	9966.82	1.69492
0.33	2.65487	23996.2	1.5873	10393.3	3.125	14529.9	1.50754	9195.11	2.54237	14168.4	2.85714	25162.9	2.17391	11545.1	2.67857	12936.4	2.75229	10420.3	2.9703	16942	2.5	16533.8	3.40909	31734.4	4.10959	28780.9	4.16667	25836.2	4.47761	25258.7	2.72727	11098	3.33333	31113.8	2.05479	15087.6	2.88462	22016	2.43902	26033	4.91803	21550.4	3.37079	24121.3	2.72727	14698	2.83019	9424.08	2.54237
0.44	3.53982	20964.2	2.1164	9896.29	4.16667	13709.2	2.01005	8339.76	3.38983	14785.9	3.80952	24975.4	2.89855	11638.6	3.57143	13970.5	3.66972	9672.78	3.9604	14426.8	3.33333	15818.2	4.54545	28573.4	5.47945	25731.7	5.55556	23220.4	5.97015	27184	3.63636	10953.2	4.44444	32134.5	2.73973	14852.2	3.84615	22576	3.25203	22958.9	6.55738	20368.5	4.49438	23405.4	3.63636	14038.3	3.77358	9316.88	3.38983
0.55	4.42478	17086.9	2.6455	9619.65	5.20833	13370.2	2.51256	7826.78	4.23729	14521.4	4.7619	25555.1	3.62319	11826.9	4.46429	13444.4	4.58716	9680.87	4.9505	13693.8	4.16667	15263.4	5.68182	25952	6.84932	25292.5	6.94444	21022.3	7.46269	30184.7	4.54545	10772.4	5.55556	30327.7	3.42466	14632.3	4.80769	24464	4.06504	20535	8.19672	20010.9	5.61798	22982	4.54545	14327.7	4.71698	9675.94	4.23729
0.66	5.30973	15784.9	3.1746	9058.19	6.25	12647	3.01508	7178.59	5.08475	15209.4	5.71429	25882.8	4.34783	12326.2	5.35714	13243.3	5.50459	9784.12	5.94059	12866.5	5	15669.8	6.81818	25594.2	8.21918	26272.4	8.33333	18472.5	8.95522	28795	5.45455	11032	6.66667	31313.5	4.10959	14715.5	5.76923	24144	4.87805	20155.9	9.83607	19960.5	6.74157	20618.7	5.45455	14065.6	5.66038	10164.4	5.08475
0.77	6.19469	15562	3.7037	8649.48	7.29167	13144.6	3.51759	7718.53	5.9322	15039.9	6.66667	24753.6	5.07246	11468.9	6.25	13460.6	6.42202	9376.36	6.93069	12812.1	5.83333	16509.8	7.95455	27344	9.58904	25839.9	9.72222	16621.8	10.4478	24028	6.36364	11339	7.77778	28389	4.79452	15795.3	6.73077	21216	5.69106	19272.7	11.4754	19838.8	7.86517	18663.6	6.36364	14459.6	6.60377	10289	5.9322
0.88	7.07965	14384.5	4.2328	8446.75	8.33333	12373.3	4.0201	7359.02	6.77966	14853	7.61905	22828	5.7971	11063	7.14286	13846.4	7.33945	9380.67	7.92079	12443.4	6.66667	17305.3	9.09091	27642.9	10.9589	24636.2	11.1111	16388.2	11.9403	19845.7	7.27273	11514.9	8.88889	26397.7	5.47945	17010.5	7.69231	18896	6.50407	19248.2	13.1148	19541.8	8.98876	17463.2	7.27273	14557.2	7.54717	10774.1	6.77966
0.99	7.9646	14188.8	4.7619	8185.19	9.375	11871.5	4.52261	6715.34	7.62712	13846.5	8.57143	19978.2	6.52174	10944.4	8.03571	15391.9	8.25688	9338.67	8.91089	12573.6	7.5	18101	10.2273	27423.4	12.3288	23069.9	12.5	18111.4	13.4328	17978.5	8.18182	11081.9	10	23704.3	6.16438	16859.8	8.65385	16864	7.31707	18387.4	14.7541	18194.8	10.1124	15505.1	8.18182	14921.5	8.49057	11637.9	7.62712
1.1	8.84956	14662.5	5.29101	8670.12	10.4167	10844.5	5.02513	6628.86	8.47458	12737.8	9.52381	18807.8	7.24638	10836.9	8.92857	16896.7	9.17431	9722.49	9.90099	11914	8.33333	18638.1	11.3636	26800	13.6986	22768.5	13.8889	18087.4	14.9254	16904.8	9.09091	11200.8	11.1111	22249.1	6.84932	16058.9	9.61538	14784	8.13008	16462.1	16.3934	17085.7	11.236	14653.5	9.09091	14567.7	9.43396	11729.8	8.47458
1.21	9.73451	15241.9	5.82011	8897.74	11.4583	11314.6	5.52764	6893.99	9.32203	12046.1	10.4762	18873	7.97101	11188	9.82143	18583.7	10.0917	9885.86	10.8911	11217.2	9.16667	16863.8	12.5	24666.5	15.0685	23296.8	15.2778	18113.3	16.4179	15937.7	10	10548.7	12.2222	22157.7	7.53425	13585.1	10.5769	15280	8.94309	14825.5	18.0328	16441.8	12.3596	14058.9	10	13369.9	10.3774	11440	9.32203
1.32	10.6195	14344.5	6.34921	8833.17	12.5	10745.2	6.03015	7299.35	10.1695	11428.2	11.4286	18051.2	8.69565	11589	10.7143	20605.4	11.0092	10064.9	11.8812	10513.2	10	14722.9	13.6364	23163.1	16.4384	23446.6	16.6667	17399.8	17.9104	16064.9	10.9091	10002.3	13.3333	22231.7	8.21918	12958.7	11.5385	16400	9.7561	13334.8	19.6721	16193.5	13.4831	14068.4	10.9091	13251.5	11.3208	11245.4	10.1695
1.43	11.5044	13337.3	6.87831	8570.27	13.5417	10414.5	6.53266	8038.97	11.0169	11910.2	12.381	18147.1	9.42029	11764.2	11.6071	21537.7	11.9266	10458.8	12.8713	10682.7	10.8333	13587.2	14.7727	21764.1	17.8082	22532	18.0556	16666	19.403	17050.2	11.8182	9725.98	14.4444	23031.9	8.90411	12093	12.5	14992	10.5691	13282.6	21.3115	16260.8	14.6067	14349.3	11.8182	12937.4	12.2642	11500.4	11.0169
1.54	12.3894	12902.2	7.40741	7770.68	14.5833	10648.3	7.03518	7986.92	11.8644	13425.7	13.3333	17960.3	10.1449	12187.5	12.5	20549.3	12.844	10560.8	13.8614	10853.9	11.6667	12687.2	15.9091	20171.9	19.1781	21458.8	19.4444	15370.1	20.8955	17552.6	12.7273	9309.36	15.5556	22218.8	9.58904	11947.6	13.4615	15024	11.3821	14527.4	22.9508	16543.7	15.7303	14619.2	12.7273	12463.8	13.2075	12012.4	11.8644
1.65	13.2743	12937.5	7.93651	7129.34	15.625	10789.1	7.53769	6968.31	12.7119	13480.8	14.2857	18337.4	10.8696	12739.6	13.3929	18642.4	13.7615	10966.3	14.8515	11139	12.5	11986.1	17.0455	21308.5	20.5479	19668.5	20.8333	13650.5	22.3881	16808.9	13.6364	9475.59	16.6667	21707.1	10.274	10771.2	14.4231	14640	12.1951	14790	24.5902	16491.6	16.8539	14366.8	13.6364	12728.2	14.1509	12252.7	12.7119
1.76	14.1593	12961.2	8.46561	6893.21	16.6667	10946.1	8.0402	6168.56	13.5593	13754.6	15.2381	18687.2	11.5942	12997.7	14.2857	16907.6	14.6789	11758.2	15.8416	11392.8	13.3333	11723.8	18.1818	21690.7	21.9178	18875.2	22.2222	13321.7	23.8806	16193.7	14.5455	9671.76	17.7778	19668.6	10.9589	11325.3	15.3846	14336	13.0081	15184.6	26.2295	16161.5	17.9775	14187.3	14.5455	12654.9	15.0943	12818.6	13.5593
1.87	15.0442	12945	8.99471	6880.51	17.7083	11780.7	8.54271	5619.07	14.4068	12887.1	16.1905	19362.2	12.3188	11887.9	15.1786	15391.7	15.5963	11151.9	16.8317	11481.7	14.1667	12240.2	19.3182	21899.1	23.2877	18507.5	23.6111	13809.1	25.3731	15677.4	15.4545	9920.45	18.8889	18439.8	11.6438	11517.8	16.3462	14272	13.8211	14294.3	27.8689	15783.3	19.1011	15125.4	15.4545	12183.7	16.0377	13699.3	14.4068
1.98	15.9292	13214.3	9.52381	7329.99	18.75	12608.7	9.04523	5318.34	15.2542	11262.5	17.1429	19430.3	13.0435	11354.4	16.0714	14387	16.5138	10303.3	17.8218	11139.5	15	12504.7	20.4545	21732.9	24.6575	19394.3	25	14377.6	26.8657	16863.8	16.3636	9510.29	20	17918.8	12.3288	11067.3	17.3077	14080	14.6341	13605.6	29.5082	15728.9	20.2247	16692.5	16.3636	12228.5	16.9811	13929.8	15.2542
2.09	16.8142	12387.7	10.0529	7882.19	19.7917	12890.6	9.54774	5003.21	16.1017	10432.7	18.0952	18135.2	13.7681	11088.4	16.9643	14452.7	17.4312	9722.2	18.8119	11637.3	15.8333	12007	21.5909	21452.3	26.0274	19920.8	26.3889	15199.3	28.3582	19149.6	17.2727	8670.14	21.1111	18505	13.0137	10532.4	18.2692	15728	15.4472	13299.1	31.1475	16049.4	21.3483	17655	17.2727	12145.6	17.9245	13516.9	16.1017
2.2	17.6991	11458.6	10.582	8155.22	20.8333	12676.8	10.0503	4864.93	16.9492	10708	19.0476	18650.8	14.4928	11652.6	17.8571	13986.4	18.3486	9385.33	19.802	12397.2	16.6667	11304.3	22.7273	19830	27.3973	21678.1	27.7778	17343.8	29.8507	20402.1	18.1818	8091.52	22.2222	18870.9	13.6986	9846.32	19.2308	17184	16.2602	13874.6	32.7869	16544	22.4719	17099.9	18.1818	11674.8	18.8679	13194.1	16.9492
2.31	18.5841	10899.5	11.1111	8106.68	21.875	13649.4	10.5528	4724.85	17.7966	10741.7	20	17400.3	15.2174	11832.1	18.75	13793	19.2661	9463.48	20.7921	12765.3	17.5	10477.1	23.8636	18973.7	28.7671	22750.9	29.1667	19402.8	31.3433	22673.2	19.0909	7717.67	23.3333	18637.5	14.3836	9188.56	20.1923	18992	17.0732	15536.9	34.4262	16742	23.5955	17242	19.0909	11372.9	19.8113	12140.6	17.7966
2.42	19.469	10702.1	11.6402	8162.03	22.9167	12532.6	11.0553	4777.1	18.6441	10571	20.9524	16928	15.942	11909.8	19.6429	14319.2	20.1835	9043.05	21.7822	14953.9	18.3333	10527	25	18514	30.137	25129.7	30.5556	21507.2	32.8358	25724.7	20	7816.52	24.4444	18232.8	15.0685	8480	21.1538	18128	17.8862	17750.2	36.0656	16741.7	24.7191	18012.7	20	11978.1	20.7547	11413.7	18.6441
2.53	20.354	11838.8	12.1693	7531.2	23.9583	11749	11.5578	4844.43	19.4915	10437.5	21.9048	16749.6	16.6667	10664.5	20.5357	13917.2	21.1009	8334.54	22.7723	16483.6	19.1667	10161.2	26.1364	18442.4	31.5068	28159.6	31.9444	21112.8	34.3284	30307.8	20.9091	8324.71	25.5556	17444.1	15.7534	8912.32	22.1154	16784	18.6992	18567.8	37.7049	16587.8	25.8427	18802.2	20.9091	12569.6	21.6981	11227	19.4915
2.64	21.2389	12190.4	12.6984	6566.24	25	10981.3	12.0603	5044.16	20.339	9532.79	22.8571	16834.8	17.3913	9840.63	21.4286	12434.3	22.0183	8208.63	23.7624	17675.5	20	9785.6	27.2727	18001.9	32.8767	29858.2	33.3333	22422.9	35.8209	34040.5	21.8182	8790.66	26.6667	17269.8	16.4384	8761.38	23.0769	16944	19.5122	18463.8	39.3443	17900.6	26.9663	19224.4	21.8182	12148.3	22.6415	11337.8	20.339
2.75	22.1239	12658.9	13.2275	6380.8	26.0417	10799.8	12.5628	5576.43	21.1864	8616.77	23.8095	17403.4	18.1159	9648.34	22.3214	11570.3	22.9358	7872.08	24.7525	17244	20.8333	10161.1	28.4091	17955.8	34.2466	31942.7	34.7222	24019.2	37.3134	35363.8	22.7273	9057.43	27.7778	18024	17.1233	8339.73	24.0385	17184	20.3252	16852	40.9836	18940.9	28.0899	19489.4	22.7273	11702.1	23.5849	11142.8	21.1864
2.86	23.0088	12468.4	13.7566	6691.68	27.0833	10090.1	13.0653	5695.6	22.0339	8620.95	24.7619	17794.9	18.8406	8453.31	23.2143	11359.7	23.8532	7660.27	25.7426	17047.1	21.6667	10272.1	29.5455	18076.4	35.6164	34825.8	36.1111	25082.4	38.806	35433	23.6364	9597.23	28.8889	18507.1	17.8082	8033.63	25	17152	21.1382	15512.4	42.623	20357.9	29.2135	20414.3	23.6364	10833.5	24.5283	11266	22.0339
2.97	23.8938	12871.1	14.2857	6887.68	28.125	10036.2	13.5678	5791.29	22.8814	9340.92	25.7143	18849.4	19.5652	7850.56	24.1071	10825.5	24.7706	7755.02	26.7327	17078.3	22.5	10883.3	30.6818	19192.8	36.9863	38158	37.5	24943.1	40.2985	33819	24.5455	9335.47	30	20060.2	18.4932	8159.82	25.9615	16794.3	21.9512	14847.1	44.2623	21010.1	30.3371	20672	24.5455	9868.12	25.4717	10898.8	22.8814
3.08	24.7788	13232.8	14.8148	6802.24	29.1667	8936.09	14.0704	5392.08	23.7288	10205.8	26.6667	18990	20.2899	7402.1	25	11238.2	25.6881	8095	27.7228	17065.9	23.3333	12094.7	31.8182	17332	38.3562	41232.5	38.8889	23484.7	41.791	29780.8	25.4545	9202.47	31.1111	21796.5	19.1781	8453.72	26.9231	15805.7	22.7642	15739.8	45.9016	20818.1	31.4607	20658.1	25.4545	9313.39	26.4151	10945.6	23.7288
3.19	25.6637	12860.5	15.3439	6697.6	30.2083	8748.23	14.5729	4920.23	24.5763	10770	27.619	19517.9	21.0145	8078.06	25.8929	11694.4	26.6055	8075.53	28.7129	17066	24.1667	13083.3	32.9545	16987.4	39.726	43916.5	40.2778	20587.8	43.2836	25112.8	26.3636	9823.44	32.2222	23251.9	19.863	8285.92	27.8846	15334.6	23.5772	17580.3	47.541	19181.8	32.5843	19822	26.3636	9519.57	27.3585	11696.7	24.5763
3.3	26.5487	14766.5	15.873	5844	31.25	8525.11	15.0754	4759.49	25.4237	11196.1	28.5714	19854.2	21.7391	7970.49	26.7857	12041	27.5229	8146.98	29.703	16669.9	25	13549.5	34.0909	17502.5	41.0959	43890.8	41.6667	17609.1	44.7761	21493.9	27.2727	10858.4	33.3333	23144.2	20.5479	8632.6	28.8462	13499.5	24.3902	20677.7	49.1803	17934.9	33.7079	18093.2	27.2727	8840.81	28.3019	12459.1	25.4237
3.41	27.4336	17063.2	16.4021	5556.48	32.2917	8506.02	15.5779	4739.01	26.2712	12091.1	29.5238	19719.8	22.4638	7572.26	27.6786	11695.4	28.4404	9068.62	30.6931	15622.5	25.8333	13988.1	35.2273	18223.4	42.4658	40955.3	43.0556	15483.4	46.2687	19915.4	28.1818	11451.5	34.4444	22784	21.2329	8907.99	29.8077	13235.3	25.2033	22676.5	50.8197	17423.7	34.8315	16908.8	28.1818	8572.19	29.2453	12811.6	26.2712
3.52	28.3186	18249.4	16.9312	5708.96	33.3333	8536.75	16.0804	4738.85	27.1186	12487.7	30.4762	19577.1	23.1884	7401.96	28.5714	11331.6	29.3578	9522.32	31.6832	14961.7	26.6667	13992.3	36.3636	18558.8	43.8356	36790.5	44.4444	13809.5	47.7612	18979.4	29.0909	11477.8	35.5556	23856.8	21.9178	9902.76	30.7692	12293.8	26.0163	23282.8	52.459	17714.9	35.9551	15752.2	29.0909	8579.5	30.1887	12455.1	27.1186
3.63	29.2035	19024.5	17.4603	5711.2	34.375	8745.83	16.5829	4815.42	27.9661	12151.1	31.4286	19436.7	23.913	7504.48	29.4643	11142.7	30.2752	9656.97	32.6733	14070.8	27.5	14711.6	37.5	17870.9	45.2055	33014.1	45.8333	13334.9	49.2537	17322.6	30	11941.3	36.6667	21963.4	22.6027	10457.8	31.7308	11874.2	26.8293	24373.9	54.0984	16545.3	37.0787	14997.2	30	8718.5	31.1321	12779.7	27.9661
3.74	30.0885	20023.4	17.9894	5763.84	35.4167	9016.65	17.0854	4843.07	28.8136	12798	32.381	19812.7	24.6377	7601.51	30.3571	10851.6	31.1927	9907.35	33.6634	13177.3	28.3333	16478.8	38.6364	19908.2	46.5753	29292.2	47.2222	13262	50.7463	17834.7	30.9091	13470.3	37.7778	18523.8	23.2877	11683.4	32.6923	12738.4	27.6423	24800.4	55.7377	16076.5	38.2022	14016.9	30.9091	9222.65	32.0755	13707	28.8136
3.85	30.9735	20289.3	18.5185	5663.36	36.4583	9306.34	17.5879	4731.51	29.661	14207.5	33.3333	22043.2	25.3623	7540.74	31.25	10513.4	32.1101	10272.6	34.6535	12990	29.1667	17860	39.7727	21994.1	47.9452	28876.2	48.6111	13593	52.2388	19536.8	31.8182	14979.4	38.8889	16516.2	23.9726	12635.2	33.6538	12591.3	28.4553	25119.1	57.377	16727.9	39.3258	13519.7	31.8182	10560.5	33.0189	14343.1	29.661
3.96	31.8584	21188.3	19.0476	5413.44	37.5	8834.24	18.0905	4541.08	30.5085	15370.1	34.2857	24494.5	26.087	7185.78	32.1429	10607.6	33.0275	10928.6	35.6436	12520.1	30	18623.6	40.9091	24787.2	49.3151	27924.8	50	12950.5	53.7313	22873.1	32.7273	16062.5	40	14385.9	24.6575	11844.4	34.6154	12948.6	29.2683	24029.4	59.0164	18252	40.4494	13960.8	32.7273	12120.8	33.9623	14794.5	30.5085
4.07	32.7434	21196.6	19.5767	5326.24	38.5417	9447.34	18.593	4721.66	31.3559	16088.4	35.2381	25426.7	26.8116	6846.15	33.0357	11284.5	33.945	12056.8	36.6337	11798.2	30.8333	18740	42.0455	25897.1	50.6849	28535.8	51.3889	12981.9	55.2239	24657.9	33.6364	16626.1	41.1111	13758.3	25.3425	11186.1	35.5769	13719.4	30.0813	21979.5	60.6557	19936.9	41.573	13438.7	33.6364	14517.1	34.9057	15745	31.3559
4.18	33.6283	19830.7	20.1058	5767.52	39.5833	10250.7	19.0955	4972	32.2034	15653.4	36.1905	26669.1	27.5362	6540.09	33.9286	11434.9	34.8624	12937.1	37.6238	11833.7	31.6667	18602	43.1818	27477	52.0548	30004.8	52.7778	13682.8	56.7164	24075.5	34.5455	16562.1	42.2222	12943.1	26.0274	10454.5	36.5385	12912	30.8943	20811	62.2951	20632.3	42.6966	11947.9	34.5455	14568.7	35.8491	16291.6	32.2034
4.29	34.5133	18707.8	20.6349	6012	40.625	11003.4	19.598	5199.2	33.0508	15151.6	37.1429	24656.5	28.2609	6561.44	34.8214	12337.9	35.7798	13448.4	38.6139	11791.9	32.5	18648.1	44.3182	27318.2	53.4247	31534.8	54.1667	14231.2	58.209	24759	35.4545	15782	43.3333	12616.8	26.7123	10165.4	37.5	11696.3	31.7073	21211.8	63.9344	20497.6	43.8202	11802.9	35.4545	14537.5	36.7925	16254.4	33.0508
4.4	35.3982	17308.9	21.164	6421.12	41.6667	11886	20.1005	5814.8	33.8983	15547.2	38.0952	22636.7	28.9855	6663.64	35.7143	13760.3	36.6972	13232.3	39.604	11258.8	33.3333	19317.3	45.4545	27118.3	54.7945	33380.2	55.5556	15039.4	59.7015	26260.9	36.3636	13729.3	44.4444	12707.7	27.3973	10562.2	38.4615	10697.1	32.5203	18974.2	65.5738	19266.9	44.9438	12224.9	36.3636	14245.4	37.7358	15782.2	33.8983
4.51	36.2832	15959.3	21.6931	6692.8	42.7083	12413.1	20.603	5831.94	34.7458	15457.2	39.0476	21555.9	29.7101	6763.59	36.6071	14749.2	37.6147	12873.3	40.5941	10295.7	34.1667	19958.5	46.5909	26878.4	56.1644	31593.3	56.9444	16479.3	61.194	27495.7	37.2727	12444.7	45.5556	12347.3	28.0822	11825.8	39.4231	11431.8	33.3333	17494.4	67.2131	19443.5	46.0674	12746.4	37.2727	13875.1	38.6792	15452	34.7458
4.62	37.1681	14045	22.2222	6264.48	43.75	12194.1	21.1055	6440.44	35.5932	14713.7	40	20839.3	30.4348	7390.33	37.5	15025.6	38.5321	12160.7	41.5842	9927.09	35	19193.3	47.7273	29354.6	57.5342	29784.7	58.3333	18328.5	62.6866	24868.7	38.1818	11658.9	46.6667	13031.3	28.7671	12467.6	40.3846	12022.5	34.1463	16566.7	68.8525	20315.8	47.191	13609	38.1818	13014.8	39.6226	15075.3	35.5932
4.73	38.0531	13659.3	22.7513	6016.96	44.7917	10726.1	21.608	7198.36	36.4407	14776.3	40.9524	20942.9	31.1594	8214.36	38.3929	15303	39.4495	11813.3	42.5743	9580.54	35.8333	17606.6	48.8636	32471.1	58.9041	26983.4	59.7222	19758.2	64.1791	22943.2	39.0909	10752.2	47.7778	13534	29.4521	13891.6	41.3462	12311.2	34.9593	16208.9	70.4918	21053.4	48.3146	13239.3	39.0909	12653.8	40.566	14403.9	36.4407
4.84	38.9381	13354	23.2804	5680	45.8333	10502.7	22.1106	6633.28	37.2881	13733.3	41.9048	19834	31.8841	7992.35	39.2857	16082.4	40.367	10371.2	43.5644	9615.67	36.6667	15779.6	50	34301.1	60.274	24135.9	61.1111	19972.1	65.6716	24907.3	40	11595.1	48.8889	14013.1	30.137	16884.9	42.3077	12626.1	35.7724	17355.1	72.1311	21523.5	49.4382	14004.8	40	13062.2	41.5094	14265.4	37.2881
4.95	39.823	12899.2	23.8095	5749.92	46.875	9787.53	22.6131	5778.03	38.1356	12920.2	42.8571	19134.5	32.6087	7612.15	40.1786	16382.6	41.2844	9198.03	44.5545	9051.86	37.5	14667.8	51.1364	33682.8	61.6438	21489.2	62.5	20861.2	67.1642	27901.9	40.9091	11660.5	50	14934.7	30.8219	19543.3	43.2692	12658	36.5854	19549.7	73.7705	22409.6	50.5618	15217	40.9091	12960.5	42.4528	14317.1	38.1356
5.06	40.708	13695.4	24.3386	6075.36	47.9167	9619	23.1156	5239.27	38.9831	12192	43.8095	18877.2	33.3333	7017.78	41.0714	15580.4	42.2018	8269.55	45.5446	9056.96	38.3333	12883.3	52.2727	31243	63.0137	18875.9	63.8889	20139.1	68.6567	30408.5	41.8182	12109.9	51.1111	14924.8	31.5068	20075.3	44.2308	12548.3	37.3984	21162.3	75.4098	21168	51.6854	16481.6	41.8182	12652.2	43.3962	13618.2	38.9831
5.17	41.5929	13922.3	24.8677	6225.44	48.9583	9664.66	23.6181	5206.78	39.8305	12374.9	44.7619	19027.4	34.058	7340.83	41.9643	14572.9	43.1193	7967.85	46.5347	9140.54	39.1667	11892.1	53.4091	29175.1	64.3836	17098.4	65.2778	20758.5	70.1493	30643.4	42.7273	11465.2	52.2222	14485	32.1918	19417.3	45.1923	12719.8	38.2114	21322.2	77.0492	21384.3	52.809	16924.2	42.7273	10489.2	44.3396	12268.4	39.8305
5.28	42.4779	13808.8	25.3968	6474.4	50	9922.9	24.1206	5148.74	40.678	12283.9	45.7143	19350.9	34.7826	7331.98	42.8571	14977.9	44.0367	8099.5	47.5248	9299.73	40	12407	54.5455	28854.8	65.7534	16305	66.6667	22183.4	71.6418	29924.5	43.6364	10539.2	53.3333	14639.3	32.8767	18988.6	46.1538	13054.5	39.0244	21259.3	78.6885	21112	53.9326	17525.3	43.6364	9753.64	45.283	11486.6	40.678
5.39	43.3628	13329	25.9259	6985.76	51.0417	10112.4	24.6231	5226.83	41.5254	11305.8	46.6667	20097.3	35.5072	7796.8	43.75	14537	44.9541	8193.68	48.5149	9478.73	40.8333	12803.6	55.6818	28447.5	67.1233	16817.3	68.0556	24455	73.1343	29787.2	44.5455	9174.39	54.4444	15184.4	33.5616	19381.5	47.1154	14264.2	39.8374	21754.8	80.3279	19965.4	55.0562	18677.8	44.5455	8600.27	46.2264	11223.3	41.5254
5.5	44.2478	12988.2	26.455	7308	52.0833	9657.96	25.1256	5431.29	42.3729	10189	47.619	20230.4	36.2319	7952.11	44.6429	13887.5	45.8716	7788.58	49.505	9739.03	41.6667	12522.7	56.8182	28061.4	68.4932	18624.6	69.4444	24807.2	74.6269	29404.5	45.4545	8688.1	55.5556	16423	34.2466	19872.6	48.0769	15448.6	40.6504	22272.4	81.9672	19375.2	56.1798	19333.9	45.4545	8102.99	47.1698	10471.9	42.3729
5.61	45.1327	12527.9	26.9841	7655.88	53.125	9553.41	25.6281	5793.09	43.2203	10259.8	48.5714	19438	36.9565	8718.72	45.5357	13588.4	46.789	7301.45	50.495	10296.3	42.5	12097.9	57.9545	27534.6	69.863	19904.6	70.8333	25428	76.1194	27044.2	46.3636	8593.36	56.6667	18973	34.9315	20269.1	49.0385	15377.5	41.4634	20768	83.6066	19254.7	57.3034	20451.7	46.3636	7974.48	48.1132	9546.59	43.2203
5.72	46.0177	12063.2	27.5132	8238.78	54.1667	9650.79	26.1307	5917.85	44.0678	9331.4	49.5238	18488.9	37.6812	9665.24	46.4286	13719	47.7064	7118.56	51.4851	10235.1	43.3333	11190	59.0909	26319.7	71.2329	21431.6	72.2222	25852.4	77.6119	25021.7	47.2727	8509.01	57.7778	20736.5	35.6164	20412.7	50	15290.2	42.2764	19408.4	85.2459	19131.7	58.427	20561.8	47.2727	8234.62	49.0566	8667.62	44.0678
5.83	46.9027	12159.8	28.0423	7628.31	55.2083	10300	26.6332	6346.65	44.9153	8616.71	50.4762	17369.4	38.4058	10662.8	47.3214	13772.9	48.6239	7099.01	52.4752	11086.4	44.1667	10507.8	60.2273	24112.7	72.6027	23704.3	73.6111	26142.8	79.1045	23377.7	48.1818	8766.14	58.8889	21169.3	36.3014	20490.5	50.9615	15243.8	43.0894	18220.5	86.8852	19186.4	59.5506	19683	48.1818	7871.17	50	8207.04	44.9153
5.94	47.7876	11976.8	28.5714	7619.2	56.25	10554.5	27.1357	6613.43	45.7627	8230.04	51.4286	16505.5	39.1304	11739.3	48.2143	13865.1	49.5413	6959.18	53.4653	11737.2	45	10486.9	61.3636	21433.3	73.9726	23496.2	75	26224.3	80.597	21861.7	49.0909	8260.6	60	20991.7	36.9863	20349.1	51.9231	16114.7	43.9024	17773.7	88.5246	19123.3	60.6742	19166	49.0909	7869.49	50.9434	8890.32	45.7627
6.05	48.6726	11872.3	29.1005	8052.25	57.2917	10301.3	27.6382	7330.29	46.6102	8240.7	52.381	15228.2	39.8551	12792.1	49.1071	12979.7	50.4587	6989.08	54.4554	12885.7	45.8333	10885.7	62.5	19795	75.3425	23922	76.3889	27106.7	82.0896	20141.3	50	8464.93	61.1111	20831.5	37.6712	19384.9	52.8846	17552.2	44.7154	17696.5	90.1639	18961.4	61.7978	17785.6	50	7676.42	51.8868	9410.7	46.6102
6.16	49.5575	12694	29.6296	8459.17	58.3333	9658.19	28.1407	8507.19	47.4576	8406.62	53.3333	13452.8	40.5797	13352.2	50	13032.1	51.3761	6804.46	55.4455	15749	46.6667	11159.4	63.6364	19452.6	76.7123	25032	77.7778	27400.3	83.5821	19540.9	50.9091	8985.87	62.2222	21683.8	38.3562	17770.6	53.8462	18996.1	45.5285	17033.4	91.8033	19048.5	62.9213	16765.7	50.9091	7465.05	52.8302	9057.18	47.4576
6.27	50.4425	13646.9	30.1587	8738.57	59.375	9612.13	28.6432	8427.66	48.3051	9009.8	54.2857	12420.9	41.3043	12683.2	50.8929	11502.9	52.2936	6623.73	56.4356	17382.1	47.5	10800.6	64.7727	19098.5	78.0822	26708.8	79.1667	28120.2	85.0746	19345.8	51.8182	9328.42	63.3333	22049.6	39.0411	16021	54.8077	20326.7	46.3415	16242.9	93.4426	20095.8	64.0449	16311.7	51.8182	7184.12	53.7736	8750.66	48.3051
6.38	51.3274	15009	30.6878	8467.06	60.4167	9360.84	29.1457	8525.88	49.1525	9218.65	55.2381	11561.9	42.029	11028.2	51.7857	10581	53.211	6455.22	57.4257	15786.9	48.3333	10350.5	65.9091	19465.7	79.4521	28854.6	80.5556	28602.7	86.5672	19528.9	52.7273	9030.97	64.4444	22421	39.726	15119.9	55.7692	20391.9	47.1545	15271.2	95.082	19651.3	65.1685	17057.9	52.7273	7612.11	54.717	8597.5	49.1525
6.49	52.2124	15330.1	31.2169	8161.31	61.4583	8850.94	29.6482	9104.57	50	9374.53	56.1905	11260.2	42.7536	9864.32	52.6786	9576.87	54.1284	6375.74	58.4158	12865.2	49.1667	10449.6	67.0455	19379.3	80.8219	29878.3	81.9444	27708.3	88.0597	18911.3	53.6364	9053.2	65.5556	22582.5	40.411	14505.4	56.7308	19839	47.9675	15195	96.7213	20049.4	66.2921	18587.4	53.6364	7628.78	55.6604	8513.08	50
6.6	53.0973	14985.8	31.746	8438.38	62.5	8140.59	30.1508	9527.68	50.8475	7773.71	57.1429	11083.5	43.4783	9472	53.5714	9107.06	55.0459	6290.43	59.4059	12239.6	50	11035.9	68.1818	19319.6	82.1918	30660.7	83.3333	25821.9	89.5522	17834.3	54.5455	9436.22	66.6667	22416.8	41.0959	13927.6	57.6923	18648.3	48.7805	16475.2	98.3607	20492.7	67.4157	18773.2	54.5455	7952.33	56.6038	8642.03	50.8475
6.71	53.9823	13753.1	32.2751	8584.05	63.5417	8023.15	30.6533	9379.94	51.6949	7128.76	58.0952	10475.1	44.2029	8242.24	54.4643	9373.42	55.9633	6318.49	60.396	12498	50.8333	11233.3	69.3182	19083.5	83.5616	28978.2	84.7222	24471	91.0448	16516.9	55.4545	9327.38	67.7778	22908.4	41.7808	13119.4	58.6538	16107.8	49.5935	17888.8	100	19957.3	68.5393	19796	55.4545	8127.77	57.5472	9368.98	51.6949
6.82	54.8673	12862.8	32.8042	8950.76	64.5833	7805.23	31.1558	8911.1	52.5424	6769.9	59.0476	10575	44.9275	8249.28	55.3571	9639.36	56.8807	6864.39	61.3861	11914.5	51.6667	11782	70.4545	19213.7	84.9315	27012.9	86.1111	23298.6	92.5373	16009.3	56.3636	9996.56	68.8889	24259	42.4658	13395.5	59.6154	14114.5	50.4065	18758.4			69.6629	19615.7	56.3636	7704.02	58.4906	10102.5	52.5424
6.93	55.7522	12029.4	33.3333	9310.64	65.625	7573.18	31.6583	8438.89	53.3898	6746.02	60	10755.8	45.6522	8760.64	56.25	9405.35	57.7982	7034.07	62.3762	14153.5	52.5	11872.9	71.5909	20191	86.3014	24432.6	87.5	21593.5	94.0299	16893.8	57.2727	10957.4	70	25625.5	43.1507	13197.3	60.5769	13425.2	51.2195	18945.6			70.7865	18552.5	57.2727	7805.84	59.434	10314.1	53.3898
7.04	56.6372	11943.6	33.8624	9902.55	66.6667	7558.31	32.1608	9081.8	54.2373	7290.79	60.9524	11007.4	46.3768	9049.92	57.1429	8689.21	58.7156	6899.8	63.3663	16621.4	53.3333	10944	72.7273	21316.1	87.6712	21349	88.8889	19638.2	95.5224	16426.8	58.1818	11666.2	71.1111	25211.3	43.8356	11738.1	61.5385	13880.5	52.0325	18259			71.9101	18366.2	58.1818	8519.04	60.3774	9989.88	54.2373
7.15	57.5221	13030.6	34.3915	9939.75	67.7083	8267.09	32.6633	8811.27	55.0847	7610.08	61.9048	11563	47.1014	8733.76	58.0357	9013.57	59.633	6807.79	64.3564	17418.7	54.1667	10306.9	73.8636	21198.8	89.0411	20954.7	90.2778	17548.4	97.0149	16473.5	59.0909	11369.9	72.2222	23714.3	44.5205	11559.4	62.5	14691.8	52.8455	17524.5			73.0337	18491.5	59.0909	8975.92	61.3208	10223.7	55.0847
7.26	58.4071	14553.4	34.9206	9573.06	68.75	8589.95	33.1658	8410.9	55.9322	7613.47	62.8571	12637.8	47.8261	8138.88	58.9286	9340.01	60.5505	7140.23	65.3465	15008.2	55	9943.23	75	20196.5	90.411	21794.2	91.6667	17665.8	98.5075	17212.9	60	10249	73.3333	23217.4	45.2055	11974.4	63.4615	15665.4	53.6585	17013.2			74.1573	17914.6	60	8707.65	62.2642	10345.7	55.9322
7.37	59.292	16074.2	35.4497	8320.19	69.7917	8911.03	33.6683	6975.76	56.7797	7885.62	63.8095	13413.6	48.5507	7651.67	59.8214	9835.81	61.4679	8122.39	66.3366	13670.3	55.8333	10003	76.1364	18672.9	91.7808	22397.7	93.0556	18608.3	100	17526.5	60.9091	9021.12	74.4444	24822.7	45.8904	12819.7	64.4231	17757.2	54.4715	17469.1			75.2809	18209	60.9091	8387.73	63.2075	11327.3	56.7797
7.48	60.177	16748	35.9788	7486.38	70.8333	9426.34	34.1709	6798.97	57.6271	8284.07	64.7619	14848.1	49.2754	6992.62	60.7143	10158.2	62.3853	8283.62	67.3267	13102.6	56.6667	10426.1	77.2727	16674.7	93.1507	22474.2	94.4444	18394.8			61.8182	9247.04	75.5556	25870	46.5753	13752.2	65.3846	18837.9	55.2846	16636.8			76.4045	18277.8	61.8182	8145.58	64.1509	12573.2	57.6271
7.59	61.0619	16720.5	36.5079	7221.37	71.875	9777.87	34.6734	6054.82	58.4746	8663.62	65.7143	15742.4	50	8024.31	61.6071	10650.8	63.3028	8697.78	68.3168	13939.2	57.5	11327	78.4091	14686.6	94.5205	22713.5	95.8333	17878.9			62.7273	9230.08	76.6667	24797.2	47.2603	14321.4	66.3462	19292.5	56.0976	15657.4			77.5281	19412.6	62.7273	8743.22	65.0943	12480.1	58.4746
7.7	61.9469	15994.7	37.037	7153.08	72.9167	9106.54	35.1759	5635.07	59.322	8918.73	66.6667	15600.7	50.7246	8730.88	62.5	10800.5	64.2202	8518.16	69.3069	15203.8	58.3333	13312.5	79.5455	13698.4	95.8904	22705.1	97.2222	17056.6			63.6364	9182.72	77.7778	23541.7	47.9452	13627.8	67.3077	20150.9	56.9106	15522.8			78.6517	21313.2	63.6364	9376.15	66.0377	11335.2	59.322
7.81	62.8319	15992.4	37.5661	7093.22	73.9583	9383.33	35.6784	5373.88	60.1695	9454.7	67.619	15640.3	51.4493	9328.76	63.3929	9744.8	65.1376	8511.03	70.297	14355.4	59.1667	15544	80.6818	13431.8	97.2603	23052	98.6111	16771.8			64.5455	9881.6	78.8889	23103.4	48.6301	12165.4	68.2692	20436.7	57.7236	15050.1			79.7753	23501.7	64.5455	9693.37	66.9811	10750.2	60.1695
7.92	63.7168	16049.2	38.0952	6928.29	75	9541.6	36.1809	5724.45	61.0169	11240.9	68.5714	14595.2	52.1739	8763.98	64.2857	9654.93	66.055	8262.5	71.2871	13136.8	60	15913.5	81.8182	13148.8	98.6301	23456.8	100	15792.7			65.4545	10334.7	80	23049	49.3151	11315.7	69.2308	22138.6	58.5366	16348.8			80.8989	24596.5	65.4545	10448.7	67.9245	10965.3	61.0169
8.03	64.6018	16733.6	38.6243	6517.21	76.0417	9151.27	36.6834	5448.22	61.8644	12282.5	69.5238	15119.4	52.8986	9172.34	65.1786	9911.71	66.9725	8204.26	72.2772	12547.9	60.8333	14552.6	82.9545	14002.1	100	25151.4					66.3636	10558.4	81.1111	23119.8	50	10766.1	70.1923	22779.5	59.3496	18066			82.0225	22789.9	66.3636	10489.1	68.8679	10960.8	61.8644
8.14	65.4867	16599	39.1534	6328.07	77.0833	8844.82	37.1859	5293.83	62.7119	11842.1	70.4762	14827.3	53.6232	9888.64	66.0714	9815.62	67.8899	8334.5	73.2673	12915.5	61.6667	13658.5	84.0909	14778.6							67.2727	10344.3	82.2222	19850.3	50.6849	9525.44	71.1538	22432.4	60.1626	18589.4			83.1461	20807.4	67.2727	10358.7	69.8113	10919.8	62.7119
8.25	66.3717	16604	39.6825	5898.36	78.125	8891.6	37.6884	4929.52	63.5593	10988.2	71.4286	15904	54.3478	10028.8	66.9643	10089.5	68.8073	8366.4	74.2574	12746.5	62.5	13497.5	85.2273	15369.6							68.1818	10572.2	83.3333	20191.9	51.3699	9318.88	72.1154	20263.7	60.9756	17835.2			84.2697	19355	68.1818	10267.7	70.7547	10829.6	63.5593
8.36	67.2566	16498.8	40.2116	5503.93	79.1667	9040.44	38.191	4796.75	64.4068	10449.7	72.381	16017.1	55.0725	9760	67.8571	10611.3	69.7248	8802.13	75.2475	13771.1	63.3333	13606.1	86.3636	16847.2							69.0909	11053.1	84.4444	21537.3	52.0548	10061.6	73.0769	17774.2	61.7886	15987.4			85.3933	19209.5	69.0909	10081.7	71.6981	10746.9	64.4068
8.47	68.1416	15853.9	40.7407	5549.35	80.2083	9019.33	38.6935	4650.44	65.2542	10094.8	73.3333	16622.3	55.7971	9673.6	68.75	10513.2	70.6422	8839.81	76.2376	18180.3	64.1667	14205	87.5	18392.6							70	11252.8	85.5556	23035.6	52.7397	10051.8	74.0385	16307.3	62.6016	14158			86.5169	17733	70	10226.5	72.6415	10616	65.2542
8.58	69.0265	15694.6	41.2698	5158.3	81.25	9625.63	39.196	4373.78	66.1017	9507.2	74.2857	17061.1	56.5217	9289.6	69.6429	10026.2	71.5596	8244.21	77.2277	19004	65	16040.8	88.6364	18598.7							70.9091	10720.3	86.6667	23438.4	53.4247	9989.76	75	16311.9	63.4146	13412.4			87.6404	18339.2	70.9091	10243.3	73.5849	11097.8	66.1017
8.69	69.9115	16061.5	41.7989	4978.32	82.2917	9266.83	39.6985	4320.34	66.9492	10368	75.2381	15711.7	57.2464	8851.2	70.5357	9684.92	72.4771	7477.02	78.2178	18333.1	65.8333	18397.3	89.7727	18222.7							71.8182	10748.8	87.7778	24850.8	54.1096	10739.5	75.9615	17260.4	64.2276	13143.5			88.764	17309.4	71.8182	10582.7	74.5283	11254	66.9492
8.8	70.7965	15105.9	42.328	4734.07	83.3333	8730.4	40.201	4436.03	67.7966	11760.3	76.1905	15177	57.971	8598.4	71.4286	9180.18	73.3945	7297.78	79.2079	15800.3	66.6667	19896.8	90.9091	18462.2							72.7273	10603	88.8889	24942.4	54.7945	11353.9	76.9231	19479.9	65.0407	14183.3			89.8876	16109.6	72.7273	10891	75.4717	11378.3	67.7966
8.91	71.6814	15215.9	42.8571	4957.95	84.375	8661.13	40.7035	4177.31	68.6441	12323.6	77.1429	15285.8	58.6957	8393.6	72.3214	9051.48	74.3119	7797.69	80.198	13129.6	67.5	19972.5	92.0455	17818.9							73.6364	10708.9	90	26287.9	55.4795	11964.6	77.8846	19937.8	65.8537	16347.4			91.0112	15336.4	73.6364	11217.9	76.4151	11832.2	68.6441
9.02	72.5664	14826.6	43.3862	4967.16	85.4167	8754.79	41.206	4226.3	69.4915	11885.4	78.0952	14845.4	59.4203	8131.2	73.2143	9629.9	75.2294	7615.67	81.1881	12552.4	68.3333	17504.5	93.1818	17787							74.5455	10108.4	91.1111	27750.4	56.1644	12599.9	78.8462	18303.7	66.6667	18937.2			92.1348	14791.1	74.5455	11010.3	77.3585	12122.8	69.4915
9.13	73.4513	15067.8	43.9153	5135.57	86.4583	9391.66	41.7085	4287.07	70.339	11516.8	79.0476	14642.6	60.1449	7593.6	74.1071	10521.1	76.1468	7445.86	82.1782	12010.7	69.1667	15941.5	94.3182	19134.8							75.4545	10119.1	92.2222	27160.2	56.8493	13134.9	79.8077	16922.5	67.4797	20215.4			93.2584	14761.8	75.4545	10487.3	78.3019	12748.5	70.339
9.24	74.3363	14668.3	44.4444	5450.26	87.5	9671.02	42.2111	4283.75	71.1864	11333.7	80	13999.4	60.8696	7897.6	75	11696.4	77.0642	7445.98	83.1683	12463.1	70	15710.3	95.4545	20902.6							76.3636	9744.27	93.3333	26908.9	57.5342	13607.5	80.7692	16870.1	68.2927	20218.5			94.382	15308.5	76.3636	10907.1	79.2453	13507.5	71.1864
9.35	75.2212	13183.1	44.9735	5714.9	88.5417	8756.91	42.7136	4377.02	72.0339	11424.9	80.9524	13098.9	61.5942	8604.8	75.8929	12482.2	77.9817	7780.24	84.1584	13119.3	70.8333	15221.3	96.5909	21261.2							77.2727	9401.38	94.4444	26925.2	58.2192	13566.6	81.7308	14775.2	69.1057	20067.9			95.5056	15915.5	77.2727	11050.9	80.1887	14145.2	72.0339
9.46	76.1062	14917	45.5026	5747.83	89.5833	8780.5	43.2161	4133.11	72.8814	12373	81.9048	12065.3	62.3188	9651.2	76.7857	13589.8	78.8991	7813.68	85.1485	12451	71.6667	13970.8	97.7273	20544.2							78.1818	9459.09	95.5556	27002.7	58.9041	13756.6	82.6923	14014.8	69.9187	19935.5			96.6292	17021.4	78.1818	10718.3	81.1321	14424.4	72.8814
9.57	76.9912	15227	46.0317	6115.2	90.625	8922.13	43.7186	4244.55	73.7288	12287.3	82.8571	11153	63.0435	10342.4	77.6786	14044.2	79.8165	7988.48	86.1386	10834.6	72.5	12394.3	98.8636	19321.4							79.0909	10814.7	96.6667	26282.7	59.589	14814.4	83.6538	15072.3	70.7317	21458			97.7528	17296.7	79.0909	10727	82.0755	13682.3	73.7288
9.68	77.8761	15396.5	46.5608	5968.58	91.6667	9265.56	44.2211	4162.06	74.5763	11332.1	83.8095	10757	63.7681	10662.4	78.5714	12649.9	80.7339	8556.51	87.1287	9871.57	73.3333	11210.5	100	17654							80	12315.7	97.7778	26341.7	60.274	16044.7	84.6154	16085.4	71.5447	22992.4			98.8764	16445.6	80	11072.1	83.0189	12611.4	74.5763
9.79	78.7611	16178.4	47.0899	5542.12	92.7083	9456.5	44.7236	4158.39	75.4237	10193.5	84.7619	10200.9	64.4928	10556.8	79.4643	11230.7	81.6514	8584.78	88.1188	8758.92	74.1667	11377.4									80.9091	12843.2	98.8889	26614.1	60.9589	17232.2	85.5769	15848	72.3577	22803.3			100	15451.3	80.9091	11285.9	83.9623	11850.2	75.4237
9.9	79.646	17446.5	47.619	5414.5	93.75	9024.19	45.2261	4275.82	76.2712	9471.4	85.7143	10106.7	65.2174	10662.4	80.3571	10818.7	82.5688	8886.21	89.1089	8776.62	75	11566.7									81.8182	12638.2	100	26441.2	61.6438	17968.9	86.5385	15286.3	73.1707	21675.8					81.8182	10862.9	84.9057	12186.2	76.2712
10.01	80.531	18208.7	48.1481	5427.08	94.7917	8776.83	45.7286	4301.42	77.1186	9097.72	86.6667	10122	65.942	11126.4	81.25	11118.8	83.4862	9081.32	90.099	9211.54	75.8333	11565									82.7273	11887.3			62.3288	17499.6	87.5	14210.1	73.9837	18180.8					82.7273	11588.3	85.8491	12527.2	77.1186
10.12	81.4159	18296.5	48.6772	5262.66	95.8333	8462.56	46.2312	4506.47	77.9661	9145.55	87.619	10616.9	66.6667	11196.8	82.1429	10548.9	84.4037	8611.65	91.0891	9675.2	76.6667	12953.5									83.6364	11287.4			63.0137	16662.1	88.4615	13140	74.7967	16701.7					83.6364	11487.5	86.7925	10766.9	77.9661
10.23	82.3009	18062.5	49.2063	5152.15	96.875	8524.93	46.7337	4527.15	78.8136	9879.3	88.5714	10747.4	67.3913	11020.2	83.0357	9983.33	85.3211	8483.9	92.0792	10204.2	77.5	14357.1									84.5455	10225.1			63.6986	15320.8	89.4231	13532.1	75.6098	17685.3					84.5455	11488.4	87.7358	9332.22	78.8136
10.34	83.1858	17701.4	49.7354	5273.92	97.9167	8788.6	47.2362	4350.52	79.661	10152.5	89.5238	10490.6	68.1159	11198	83.9286	9857.95	86.2385	8356.25	93.0693	11285	78.3333	14461.2									85.4545	9909.88			64.3836	15332.4	90.3846	14252.6	76.4228	17824.1					85.4545	10602.2	88.6792	8391.96	79.661
10.45	84.0708	18780.5	50.2646	5633.05	98.9583	8999.66	47.7387	4200.12	80.5085	10596.9	90.4762	10163.4	68.8406	11800.8	84.8214	10100.8	87.156	7416.65	94.0594	12941	79.1667	13510									86.3636	9717.1			65.0685	15308.2	91.3462	14060.6	77.2358	18218.2					86.3636	9434.2	89.6226	7747.23	80.5085
10.56	84.9558	20311.3	50.7937	5731.86	100	9254.43	48.2412	4028.93	81.3559	10963.8	91.4286	10808.3	69.5652	10599.4	85.7143	10847.4	88.0734	7364.41	95.0495	13155.4	80	12687.2									87.2727	9543.92			65.7534	15557	92.3077	14419.8	78.0488	18657.5					87.2727	9038.89	90.566	7621.2	81.3559
10.67	85.8407	21180.3	51.3228	5823.65			48.7437	4150.24	82.2034	11168.9	92.381	10651	70.2899	9907.6	86.6071	12009	88.9908	7427.04	96.0396	13055	80.8333	12453.4									88.1818	9345.27			66.4384	18005.4	93.2692	14958.4	78.8618	20330.9					88.1818	9120.73	91.5094	7346.26	82.2034
10.78	86.7257	19691.1	51.8519	5810.88			49.2462	4165.88	83.0508	10674.4	93.3333	10232.6	71.0145	9134.53	87.5	12177.8	89.9083	6855.58	97.0297	12076.8	81.6667	11930									89.0909	8925.68			67.1233	19476.4	94.2308	13764.3	79.6748	20279.3					89.0909	9321.96	92.4528	7467.63	83.0508
10.89	87.6106	17263.7	52.381	6678.37			49.7487	4175.41	83.8983	10316.7	94.2857	9271.7	71.7391	8574.63	88.3929	11671.6	90.8257	6661.31	98.0198	13321.5	82.5	11246.8									90	8389.6			67.8082	18909.8	95.1923	14411.2	80.4878	18791.9					90	9423.04	93.3962	7531.52	83.8983
11	88.4956	15869.3	52.9101	6432.37			50.2513	4094.07	84.7458	9910.19	95.2381	9212.58	72.4638	8814.09	89.2857	10999.2	91.7431	6911.05	99.0099	13832	83.3333	10596.7									90.9091	7980.96			68.4932	16278.5	96.1538	14537.5	81.3008	17068.4					90.9091	9670.95	94.3396	8187.33	84.7458
11.11	89.3805	14567.7	53.4392	6266.01			50.7538	4089.33	85.5932	10099.3	96.1905	9239.74	73.1884	9085.6	90.1786	10408	92.6606	7217.61	100	13083.2	84.1667	10318.6									91.8182	8124.8			69.1781	16140	97.1154	15857	82.1138	15443.6					91.8182	9102.2	95.283	8081.97	85.5932
11.22	90.2655	13724.1	53.9683	5854.82			51.2563	4295.89	86.4407	10884.4	97.1429	9417.81	73.913	9508.28	91.0714	10551.7	93.578	7508.65			85	10420.5									92.7273	8202.56			69.863	16810.9	98.0769	16420.4	82.9268	14555.7					92.7273	8850.67	96.2264	8269.03	86.4407
11.33	91.1504	13433.7	54.4974	5540.98			51.7588	4566.64	87.2881	10797.5	98.0952	10451.1	74.6377	9821.89	91.9643	9233.72	94.4954	7352.15			85.8333	10309.7									93.6364	7899.52			70.5479	15658.6	99.0385	16495.9	83.7398	13970.5					93.6364	8080.54	97.1698	9451.82	87.2881
11.44	92.0354	13892.3	55.0265	5405.75			52.2613	4975.88	88.1356	10277.7	99.0476	11498.5	75.3623	9519.36	92.8571	9321.9	95.4128	6952.63			86.6667	9852.7									94.5455	7428.48			71.2329	15042.8	100	15126.6	84.5528	14164					94.5455	8425.44	98.1132	10909.6	88.1356
11.55	92.9204	14586.1	55.5556	5083.99			52.7638	5092.34	88.9831	9186.95	100	11669.3	76.087	9704.94	93.75	8958.42	96.3303	6915.06			87.5	9401.9									95.4545	8014.72			71.9178	14848.3			85.3659	14869.3					95.4545	8705.17	99.0566	10511.9	88.9831
11.66	93.8053	14223.5	56.0847	4818.41			53.2663	5234.67	89.8305	8643.5			76.8116	9845.79	94.6429	9085.35	97.2477	6717.99			88.3333	9154.45									96.3636	8062.72			72.6027	14699.2			86.1789	16011.8					96.3636	9167.18	100	9671.62	89.8305
11.77	94.6903	13457.5	56.6138	4939.31			53.7688	5411.85	90.678	8345.74			77.5362	9254.23	95.5357	9541.01	98.1651	6193.91			89.1667	9323.72									97.2727	8683.2			73.2877	13927.7			86.9919	18065					97.2727	10268.7			90.678
11.88	95.5752	13228.8	57.1429	4963.7			54.2714	4963.41	91.5254	8410.15			78.2609	8756.98	96.4286	10340.2	99.0826	6351.46			90	9573.04									98.1818	8831.04			73.9726	12805			87.8049	19646.5					98.1818	12067.8			91.5254
11.99	96.4602	13152.1	57.672	4982.1			54.7739	5281.65	92.3729	8797.42			78.9855	8655.63	97.3214	11152.5	100	7331.78			90.8333	9398.42									99.0909	8521.6			74.6575	12299.5			88.6179	18122.7					99.0909	12888.9			92.3729
12.1	97.3451	12719.8	58.2011	5085.45			55.2764	5169.84	93.2203	8716.38			79.7101	8922.86	98.2143	10435					91.6667	9094.48									100	8200			75.3425	12031.2			89.4309	18315.1					100	11880			93.2203
12.21	98.2301	12381.1	58.7302	5436.13			55.7789	4734.2	94.0678	8580.13			80.4348	9755.97	99.1071	10762.7					92.5	9053.42													76.0274	12504.8			90.2439	19107.2									94.0678
12.32	99.115	11907.7	59.2593	5665.99			56.2814	4725.89	94.9153	8815.38			81.1594	11015	100	10410.4					93.3333	9296.52													76.7123	12743.4			91.0569	19299.2									94.9153
12.43	100	10953	59.7884	6267.39			56.7839	4532.38	95.7627	9744.15			81.8841	11459.6							94.1667	9357.71													77.3973	13252.7			91.8699	20398									95.7627
12.54			60.3175	6861.58			57.2864	4449.1	96.6102	10306			82.6087	11254.6							95	9800.85													78.0822	14298.8			92.6829	19774.5									96.6102
12.65			60.8466	7119.75			57.7889	4431.96	97.4576	10481.5			83.3333	10622.2							95.8333	10208.7													78.7671	15181.7			93.4959	18538.3									97.4576
12.76			61.3757	7128.24			58.2915	4296.81	98.3051	11287.1			84.058	10165.7							96.6667	10592.5													79.4521	15338			94.3089	17618									98.3051
12.87			61.9048	7136.99			58.794	4051.2	99.1525	12606			84.7826	9450.6							97.5	11173.4													80.137	14923			95.122	17091.7									99.1525
12.98			62.4339	7228.5			59.2965	3939.35	100	13154.4			85.5072	9097.21							98.3333	10990													80.8219	13743.6			95.935	16884.3									100
13.09			62.963	7195.98			59.799	4069.41					86.2319	9271.07							99.1667	10623.7													81.5068	13091.2			96.748	16461.1
13.2			63.4921	6801.27			60.3015	4072.17					86.9565	9469.28							100	10344.2													82.1918	12358.7			97.561	17402.3
13.31			64.0212	6510.34			60.804	4128.16					87.6812	9368.69																					82.8767	12731.8			98.374	18763.8
13.42			64.5503	6118.19			61.3065	4085.45					88.4058	9262.3																					83.5616	12471.2			99.187	20342.1
13.53			65.0794	5658.51			61.809	4192.77					89.1304	8609.62																					84.2466	11455.9			100	22030.2
13.64			65.6085	5426			62.3116	4372.08					89.8551	7707.15																					84.9315	11371.2
13.75			66.1376	5111.23			62.8141	4661.98					90.5797	7874.63																					85.6164	11921.2
13.86			66.6667	4917.71			63.3166	4721.2					91.3043	7699.25																					86.3014	12371.3
13.97			67.1958	4697.41			63.8191	4773					92.029	7802.56																					86.9863	12229.9
14.08			67.7249	4621.04			64.3216	4461					92.7536	7548.18																					87.6712	11922
14.19			68.254	4713.29			64.8241	4489.17					93.4783	8183.69																					88.3562	11201.1
14.3			68.7831	4777.27			65.3266	4606.18					94.2029	8710.5																					89.0411	10793.2
14.41			69.3122	4907.16			65.8291	4661.79					94.9275	9097.26																					89.726	11500.2
14.52			69.8413	5083.49			66.3317	4827.98					95.6522	9812.59																					90.411	12232.8
14.63			70.3704	5420.53			66.8342	4589.51					96.3768	10116.8																					91.0959	13326
14.74			70.8995	5828.76			67.3367	4464.61					97.1014	10429.6																					91.7808	13205.7
14.85			71.4286	5993.92			67.8392	4389.23					97.8261	10721.8																					92.4658	11956.3
14.96			71.9577	6225.07			68.3417	4235.18					98.5507	10529.8																					93.1507	10172
15.07			72.4868	6343.19			68.8442	4213.25					99.2754	10258.6																					93.8356	10063.2
15.18			73.0159	6465.36			69.3467	4445.47					100	9877.8																					94.5205	10159.3
15.29			73.545	6055.04			69.8492	4504.21																											95.2055	10722.6
15.4			74.0741	6270.08			70.3518	4494.81																											95.8904	11908.4
15.51			74.6032	6739.84			70.8543	4430.26																											96.5753	12911.8
15.62			75.1323	5980.8			71.3568	4513.59																											97.2603	13549.5
15.73			75.6614	5870.08			71.8593	4633.44																											97.9452	13153.8
15.84			76.1905	5828.48			72.3618	4914.46																											98.6301	13330.6
15.95			76.7196	5609.6			72.8643	5221.41																											99.3151	13411.6
16.06			77.2487	5955.84			73.3668	5188.02																											100	13623.6
16.17			77.7778	6014.4			73.8693	5049.89
16.28			78.3069	6611.2			74.3719	4627.91
16.39			78.836	6746.56			74.8744	4772.18
16.5			79.3651	6943.34			75.3769	4448.58
16.61			79.8942	7148.37			75.8794	4356.83
16.72			80.4233	6375.33			76.3819	4324.81
16.83			80.9524	5967.8			76.8844	4121.16
16.94			81.4815	5683.18			77.3869	4062.81
17.05			82.0106	5683.52			77.8894	4376.84
17.16			82.5397	5495.25			78.392	4469.02
17.27			83.0688	5135.13			78.8945	4584.41
17.38			83.5979	4668.18			79.397	4912.46
17.49			84.127	4804.86			79.8995	4934.96
17.6			84.6561	5005.33			80.402	5022.08
17.71			85.1852	5309.74			80.9045	5107.42
17.82			85.7143	5822.71			81.407	5460.78
17.93			86.2434	6172.98			81.9095	5516.03
18.04			86.7725	6391.48			82.4121	5458.1
18.15			87.3016	7064.4			82.9146	5763.73
18.26			87.8307	7278.19			83.4171	5179.28
18.37			88.3598	6946.52			83.9196	4947.62
18.48			88.8889	6682.45			84.4221	4692.27
18.59			89.418	6576.69			84.9246	4800.96
18.7			89.9471	6210.37			85.4271	4900.78
18.81			90.4762	5951.66			85.9296	5201.22
18.92			91.0053	5562.83			86.4322	5517.45
19.03			91.5344	5525.19			86.9347	5736.3
19.14			92.0635	5334.77			87.4372	6013.72
19.25			92.5926	5376.48			87.9397	6506.54
19.36			93.1217	5664.86			88.4422	7840.03
19.47			93.6508	5963.19			88.9447	9291.96
19.58			94.1799	5846.46			89.4472	10377.5
19.69			94.709	5532.5			89.9497	9762.68
19.8			95.2381	5565.08			90.4523	8614.3
19.91			95.7672	5614.68			90.9548	7314.62
20.02			96.2963	5707.09			91.4573	6584.98
20.13			96.8254	5452.99			91.9598	6024.65
20.24			97.3545	6100.63			92.4623	5490.59
20.35			97.8836	6628.81			92.9648	5427.91
20.46			98.4127	7127.2			93.4673	5672.5
20.57			98.9418	7991.42			93.9698	5339.2
20.68			99.4709	8660.44			94.4724	5446.42
20.79			100	8904.12			94.9749	5361.5
20.9							95.4774	5494.51
21.01							95.9799	5688.08
21.12							96.4824	5807
21.23							96.9849	5631.34
21.34							97.4874	5770.39
21.45							97.9899	5995.86
21.56							98.4925	5629.01
21.67							98.995	5494.81
21.78							99.4975	5704.48
21.89							100	5717.48
	0		0		0		0		0		0		0		0		0		0		0		0		0		0		0		0		0		0		0		0		0		0		0		0		0
	2.5	27921.9	2.5	10632.9	2.5	13955.1	2.5	11522.3	2.5	13826	2.5	29161.8	2.5	11710.2	2.5	12405.4	2.5	12476.7	2.5	20192.9	2.5	17317.9	2.5	39122.1	2.5	31677.7	2.5	27266.4	2.5	27820.7	2.5	11203.4	2.5	32402.5	2.5	15181.4	2.5	23626.7	2.5	28193.6	2.5	25767.8	2.5	24419.1	2.5	15745.1	2.5	9702.79	2.5
	5	20682.4	5	8791.85	5	14119.6	5	7359.65	5	14491.9	5	25231.1	5	11930.6	5	13450.4	5	9924.65	5	15020.8	5	15821.3	5	30153.9	5	30100.2	5	26370.9	5	25744.6	5	10941.2	5	31624.2	5	14998.9	5	23018.7	5	21216.6	5	22836.9	5	23763.3	5	14354.7	5	9472.3	5
	7.5	15243.8	7.5	8548.4	7.5	13053.9	7.5	7369.62	7.5	15034.1	7.5	25318.2	7.5	11078.3	7.5	13516.8	7.5	9513.72	7.5	12839.3	7.5	16896.5	7.5	25773.1	7.5	25512.1	7.5	22121.4	7.5	28684.3	7.5	11295.3	7.5	30820.6	7.5	16643.1	7.5	22680	7.5	18969.5	7.5	20368.5	7.5	21800.4	7.5	14360.8	7.5	10226.7	7.5
	10	14697.7	10	7058.26	10	12122.4	10	5815.5	10	12876.8	10	20538	10	11513.7	10	16957.4	10	9530.58	10	12310.3	10	17081.5	10	27493.4	10	26056.2	10	17547.2	10	28795	10	10943.8	10	26163.7	10	12646.1	10	16848	10	14874.1	10	19985.7	10	18063.4	10	14286.4	10	11380.6	10
	12.5	13528	12.5	7967.46	12.5	10968.1	12.5	4851.09	12.5	12254.7	12.5	18357.1	12.5	12453.2	12.5	20897.5	12.5	10136.5	12.5	10865.2	12.5	13245.9	12.5	26296.6	12.5	23853.1	12.5	17249.8	12.5	21936.8	12.5	10092.3	12.5	22703.7	12.5	11170.4	12.5	15557.3	12.5	14200	12.5	19838.8	12.5	14739.2	12.5	13186.3	12.5	11395.3	12.5
	15	12949.4	15	6665.73	15	10602.7	15	5475.13	15	13374.2	15	18148.8	15	11365.1	15	18699.8	15	11095.1	15	10891.9	15	12113.7	15	23197.9	15	22768.5	15	18099.4	15	17441.7	15	9485.57	15	22631.8	15	9855.75	15	14885.3	15	14361.5	15	18868.3	15	14208.8	15	12615.6	15	12132.6	15
	17.5	12849	17.5	5903.65	17.5	10867.6	17.5	4779.17	17.5	10801.1	17.5	19159.9	17.5	11061.8	17.5	14743.8	17.5	10392.5	17.5	11437.2	17.5	11573.3	17.5	20740.2	17.5	23371.7	17.5	17756.5	17.5	15937.7	17.5	9366.96	17.5	21963	17.5	8623.36	17.5	14229.3	17.5	14236.9	17.5	17085.7	17.5	14493	17.5	12186	17.5	13482.6	17.5
	20	11020.1	20	5541.72	20	12426.7	20	4833.09	20	10583.4	20	18062.1	20	8650.74	20	14032.9	20	9424.4	20	11724.7	20	10237.7	20	21794.9	20	21995.4	20	16018	20	16557.5	20	7875.24	20	18675.7	20	8233.27	20	16456	20	18260.6	20	16317.6	20	14656.4	20	11675.3	20	12950.5	20
	22.5	12229.4	22.5	6231.58	22.5	13163.1	22.5	6383.76	22.5	8923.5	22.5	17026	22.5	7755.73	22.5	12640.6	22.5	8528.74	22.5	13859.6	22.5	10275.5	22.5	21592.6	22.5	19271.8	22.5	13486.1	22.5	17180.7	22.5	8310.63	22.5	18431.6	22.5	9147.78	22.5	17968	22.5	15737.1	22.5	16260.8	22.5	17149.1	22.5	12232	22.5	11320.3	22.5
	25	12857.4	25	5949.54	25	11754.3	25	5319.93	25	10105.6	25	17344.4	25	7502.65	25	11141.1	25	7762.46	25	17134.3	25	12402.7	25	19105.9	25	18950.9	25	14093.4	25	16193.7	25	9330.04	25	18435.1	25	11655.2	25	17093.3	25	17999.3	25	16517.7	25	17627.3	25	10801.2	25	11248.9	25
	27.5	14896.8	27.5	7106.01	27.5	10623.7	27.5	6020.46	27.5	11925	27.5	18919.7	27.5	7190.89	27.5	11657.9	27.5	8085.26	27.5	17062.7	27.5	14060.4	27.5	18319.4	27.5	20799.5	27.5	14788.5	27.5	16270.6	27.5	9961.43	27.5	17356.9	27.5	10592	27.5	16584	27.5	23444.4	27.5	16161.5	27.5	19013.3	27.5	9224.59	27.5	11180.4	27.5
	30	18636.9	30	7999.54	30	9486.13	30	8379.12	30	13052.2	30	19697.3	30	6632.19	30	11389.9	30	8912.64	30	16933.9	30	16918.5	30	18016.1	30	22750.9	30	18373.3	30	19775.9	30	11623.5	30	18863.8	30	12728.3	30	14023.1	30	24649.6	30	15756.1	30	19951.8	30	8623.4	30	12635.3	30
	32.5	20500.4	32.5	8477.87	32.5	8593.12	32.5	9067.88	32.5	15704	32.5	19608.9	32.5	7865.68	32.5	10657.6	32.5	9945.65	32.5	15292.1	32.5	18653.4	32.5	18262.4	32.5	26644.6	32.5	21310	32.5	22673.2	32.5	13463.7	32.5	21702.9	32.5	18980.2	32.5	12084	32.5	21334.1	32.5	16049.4	32.5	20665	32.5	9500.54	32.5	12980.6	32.5
	35	19911.7	35	9535.35	35	8641.29	35	7410.34	35	15385.3	35	23268.8	35	7325.69	35	11685.7	35	11974.2	35	13412.7	35	19279.3	35	17244.9	35	30900.4	35	23221	35	28016.2	35	16416.9	35	22964.1	35	19627.9	35	12759.4	35	17311	35	16643	35	18274.7	35	13735.5	35	14960.9	35
	37.5	15771.1	37.5	7545.25	37.5	9052.41	37.5	5495.09	37.5	14407.8	37.5	25584.1	37.5	8155.88	37.5	14511.7	37.5	13340.4	37.5	12159.2	37.5	16811.8	37.5	18217.7	37.5	36491.9	37.5	25012.7	37.5	34702.1	37.5	13985.3	37.5	22910.1	37.5	20417.4	37.5	12775.9	37.5	19355.7	37.5	16741.7	37.5	15374.7	37.5	14219.4	37.5	16273	37.5
	40	13304.2	40	6553.03	40	9510.77	40	4614.17	40	12495.7	40	21677.3	40	11214.9	40	15470.3	40	12282.4	40	11628.1	40	12962.6	40	19924.4	40	42574.5	40	24213.9	40	35433	40	11335.4	40	16475.3	40	17074.1	40	11275.1	40	21445.5	40	17244.2	40	13768.3	40	12910.3	40	15436.5	40
	42.5	13808.9	42.5	5184.79	42.5	11444.7	42.5	4282.09	42.5	11259.6	42.5	20538.8	42.5	12354.5	42.5	15511.9	42.5	9279.59	42.5	10111.4	42.5	12457.8	42.5	25342.2	42.5	42423.1	42.5	19098.4	42.5	31799.9	42.5	11788.5	42.5	13695.8	42.5	13737	42.5	12320	42.5	20816.3	42.5	18940.9	42.5	13699.7	42.5	12891.6	42.5	14328.8	42.5
	45	13158.6	45	5245.17	45	11777.8	45	4215.03	45	9402.64	45	19013	45	8956.96	45	14467.5	45	8087.01	45	9416.02	45	11070.6	45	27397.6	45	36790.5	45	14646.5	45	23303.4	45	10392.9	45	12662.2	45	12164.9	45	12603.1	45	17896.9	45	20684	45	11991.9	45	9614.36	45	12943.3	45
	47.5	12250.3	47.5	5843.43	47.5	10145.1	47.5	4392.28	47.5	8292.45	47.5	19724.1	47.5	8848.11	47.5	13693.4	47.5	7545.01	47.5	9098.75	47.5	10833.2	47.5	26998.3	47.5	31153.1	47.5	13298.4	47.5	19915.4	47.5	8596.82	47.5	12689.3	47.5	13216.9	47.5	13346.1	47.5	16182.5	47.5	20818.1	47.5	13177.7	47.5	8104.03	47.5	11060.6	47.5
	50	12181	50	5306.06	50	9735.52	50	4144.12	50	9200.99	50	19385.8	50	7701.87	50	13292.3	50	7058.92	50	9505.83	50	10659.1	50	32042.2	50	28400.5	50	13271.7	50	18151	50	8497.22	50	14160.6	50	11968.8	50	15372.1	50	16519.7	50	18558.4	50	13622	50	7805.69	50	8807.08	50
	52.5	14662	52.5	5935.56	52.5	9897.76	52.5	4404.36	52.5	8092.33	52.5	16367.7	52.5	8711.98	52.5	11705.4	52.5	6805.76	52.5	10539.3	52.5	11481	52.5	33075.6	52.5	29270.3	52.5	12966.2	52.5	18685.7	52.5	8926.41	52.5	14781.5	52.5	9918	52.5	15549.6	52.5	18654.3	52.5	17569.3	52.5	15849.3	52.5	7441.86	52.5	8836.02	52.5
	55	13867.2	55	6023.55	55	9602.1	55	5196.78	55	6935.57	55	12936.8	55	9696.59	55	9352.45	55	6415.48	55	12311.5	55	10766.7	55	29015	55	32457.5	55	13957	55	22873.1	55	9173.46	55	14911.9	55	10533.7	55	18958.4	55	17335.6	55	16545.3	55	17224.8	55	7731.07	55	8801.78	55
	57.5	11986.5	57.5	5042.23	57.5	10385.3	57.5	4722.28	57.5	7703.06	57.5	11301.8	57.5	9393.6	57.5	9244.64	57.5	6491.1	57.5	16306	57.5	10424.8	57.5	28254.5	57.5	31593.3	57.5	15759.4	57.5	24366.7	57.5	10093.8	57.5	17698	57.5	12566.5	57.5	20115.5	57.5	15939	57.5	16402.2	57.5	19487.8	57.5	7879.21	57.5	8577.56	57.5
	60	14552.8	60	5487.41	60	9635.16	60	4157.75	60	8622.14	60	10602	60	8374.4	60	9396.46	60	6913.89	60	12552.4	60	14024.2	60	26927.2	60	28384.1	60	19043.4	60	25509.9	60	11095	60	20965.8	60	13936.3	60	16290.2	60	16488.3	60	18252	60	20122.4	60	8734.2	60	9928.51	60
	62.5	16487.7	62.5	7095.01	62.5	8784.12	62.5	4170.13	62.5	10992.7	62.5	11108.7	62.5	8436.8	62.5	10536.5	62.5	7848.75	62.5	12855.4	62.5	14405.5	62.5	21780.3	62.5	22812.5	62.5	20416.7	62.5	27495.7	62.5	9505.71	62.5	21169	62.5	17186.3	62.5	13999.2	62.5	17470.7	62.5	20284.6	62.5	18475.8	62.5	8413.65	62.5	10186.4	62.5
	65	16258.4	65	6656.44	65	7989.66	65	4621.27	65	11093.3	65	13633.2	65	10520.5	65	10066.7	65	8607.97	65	17020	65	14337.3	65	19448.7	65	17987.1	65	20500.2	65	23906	65	9431.47	65	22235.3	65	15771.8	65	16038.1	65	13571.3	65	20497.6	65	16538.7	65	9270.91	65	11950.2	65
	67.5	16567.2	67.5	5162.17	67.5	7565.75	67.5	4630.01	67.5	9989.99	67.5	15671.5	67.5	11001.4	67.5	9938.94	67.5	8325.93	67.5	13927	67.5	18576.8	67.5	19422.5	67.5	16561.1	67.5	21471	67.5	26404.6	67.5	10412.5	67.5	22499.7	67.5	17086.7	67.5	19427.1	67.5	17420.8	67.5	19355.2	67.5	18139.5	67.5	10432.2	67.5	11521.8	67.5
	70	15870	70	4820.45	70	8589.36	70	4357.47	70	11989.8	70	15118.3	70	11199.4	70	10383.6	70	8501.01	70	14571.5	70	17282.2	70	19201.6	70	19264.6	70	24631.1	70	30408.5	70	10959.4	70	24264.3	70	17034.8	70	21287.6	70	20074	70	20315.8	70	19705.8	70	10192	70	10948.7	70
	72.5	15160.9	72.5	5962.29	72.5	9602.1	72.5	4597.31	72.5	11425.1	72.5	15582.8	72.5	9107.71	72.5	9305.53	72.5	8187.01	72.5	13346.7	72.5	14324.2	72.5	19702.4	72.5	21431.6	72.5	25640.2	72.5	30284	72.5	10907.3	72.5	24850.4	72.5	15183.2	72.5	21825.2	72.5	22417.9	72.5	21288.5	72.5	18459.3	72.5	10350.8	72.5	10788.3	72.5
	75	14854.2	75	6382.58	75	9343.82	75	4971.88	75	11997.4	75	16841.7	75	9471.92	75	10615.8	75	7547.73	75	12831	75	11637.2	75	20903.8	75	23600.2	75	26183.6	75	29595.8	75	10473.4	75	24020	75	13432.9	75	16797.8	75	18852.8	75	22409.6	75	18203	75	11039.7	75	10989.3	75
	77.5	14442.4	77.5	5848.96	77.5	9179.23	77.5	4262.84	77.5	9587.53	77.5	15391.5	77.5	9690.03	77.5	12589.5	77.5	7502.5	77.5	16985.1	77.5	12610.6	77.5	18514.7	77.5	24477	77.5	26665.5	77.5	27044.2	77.5	9754.91	77.5	25333.6	77.5	12633	77.5	17684.1	77.5	17909.2	77.5	21276.2	77.5	18243.4	77.5	10815.1	77.5	11777.8	77.5
	80	16340.5	80	6692.77	80	8966.02	80	4655.54	80	9725.8	80	14495.8	80	8897.42	80	12641.6	80	7860.8	80	17066.7	80	13753.9	80	14192.5	80	27781.7	80	27760.2	80	24199.7	80	10863.1	80	23231.4	80	14939.5	80	18388	80	19755.9	80	21112	80	21409.1	80	10839.1	80	13128	80
	82.5	18189.2	82.5	5927.46	82.5	9303.93	82.5	5312.88	82.5	10909.9	82.5	13054.5	82.5	10743.5	82.5	10828.8	82.5	8570.65	82.5	12564.2	82.5	12079.4	82.5	13290.3	82.5	30269.5	82.5	28155.5	82.5	21001.5	82.5	12599	82.5	22006.4	82.5	13529.1	82.5	15822.6	82.5	17101.3	82.5	19670.3	82.5	23693.2	82.5	11073.6	82.5	14084	82.5
	85	18931.1	85	5021.75	85	8695.76	85	5076.77	85	10300.4	85	10703.6	85	10373.3	85	9980.69	85	8859.73	85	12791.2	85	10645.7	85	14390.4	85	27995.6	85	25146.5	85	19540.9	85	11133.3	85	20864.6	85	12007.5	85	15057.5	85	14230	85	19254.7	85	20081.2	85	11521.4	85	12215.9	85
	87.5	20435.7	87.5	6152.26	87.5	9272.49	87.5	5473.89	87.5	10593.7	87.5	10114.3	87.5	9279.19	87.5	11678.1	87.5	8085.6	87.5	11052.4	87.5	9996.21	87.5	16869.8	87.5	24432.6	87.5	22446.1	87.5	19437.4	87.5	9723.63	87.5	23237	87.5	12174.1	87.5	15114.8	87.5	16315.4	87.5	19159	87.5	18471.2	87.5	9691.75	87.5	11647	87.5
	90	15900.2	90	6738.84	90	9069.48	90	8755.75	90	9369.39	90	10618.3	90	8736.94	90	11616.2	90	7215.68	90	8767.77	90	9363.28	90	18404.7	90	21151.8	90	20615.8	90	18372.8	90	8886.85	90	25360.3	90	11354.2	90	13627.4	90	18694.8	90	19123.3	90	17252.7	90	9288.58	90	8490.47	90
	92.5	13683.4	92.5	5593.61	92.5	9093.84	92.5	6805.83	92.5	8517.77	92.5	10540.9	92.5	7792.15	92.5	10064.5	92.5	6786.18	92.5	9696.98	92.5	9279.84	92.5	18140.6	92.5	22095.9	92.5	17607.1	92.5	16516.9	92.5	8165.12	92.5	27066.2	92.5	12680.2	92.5	14244.3	92.5	19601.5	92.5	19004.9	92.5	15063.8	92.5	9398.73	92.5	7478.36	92.5
	95	14089	95	5676.7	95	9085.84	95	5449.51	95	8703.96	95	9752.14	95	8384.91	95	9121.89	95	7359.47	95	12113	95	9377.12	95	18460.9	95	22593.8	95	18501.6	95	16451.6	95	7843.52	95	26917	95	10131.5	95	14361.3	95	18643.6	95	20095.8	95	15035.1	95	8452.22	95	7859.43	95
	97.5	13033.6	97.5	5688.09	97.5	8493.74	97.5	5678.26	97.5	10177.2	97.5	9290.04	97.5	10119.7	97.5	10344.6	97.5	6861.89	97.5	12762.4	97.5	10443.8	97.5	21081.9	97.5	22878.5	97.5	17467.8	97.5	16450.2	97.5	8253.55	97.5	26642.7	97.5	12273	97.5	14935.2	97.5	16812.4	97.5	19850.4	97.5	16468.5	97.5	9380.34	97.5	8600.94	97.5
	100	11747.3	100	7862.4	100	9014.23	100	5708.33	100	12349.2	100	11206.3	100	10347	100	10536	100	6625.72	100	13412.3	100	10782.8	100	19173.2	100	24304.1	100	16282.2	100	17369.7	100	8517.55	100	26465.7	100	13379.9	100	16014.3	100	19634.6	100	20225	100	16397.8	100	12278.9	100	10364.4	100
[truncated: 13 more columns]

## Sheet: IF Normalised
	0		0		0		0		0		0		0		0		0		0		0		0		0		0		0		0		0		0		0		0		0		0		0		0		0
	2.5	27921.9	2.5	10632.9	2.5	13955.1	2.5	11522.3	2.5	13826	2.5	29161.8	2.5	11710.2	2.5	12405.4	2.5	12476.7	2.5	20192.9	2.5	17317.9	2.5	39122.1	2.5	31677.7	2.5	27266.4	2.5	27820.7	2.5	11203.4	2.5	32402.5	2.5	15181.4	2.5	23626.7	2.5	28193.6	2.5	25767.8	2.5	24419.1	2.5	15745.1	2.5	9702.79	2.5
	5	20682.4	5	8791.85	5	14119.6	5	7359.65	5	14491.9	5	25231.1	5	11930.6	5	13450.4	5	9924.65	5	15020.8	5	15821.3	5	30153.9	5	30100.2	5	26370.9	5	25744.6	5	10941.2	5	31624.2	5	14998.9	5	23018.7	5	21216.6	5	22836.9	5	23763.3	5	14354.7	5	9472.3	5
	7.5	15243.8	7.5	8548.4	7.5	13053.9	7.5	7369.62	7.5	15034.1	7.5	25318.2	7.5	11078.3	7.5	13516.8	7.5	9513.72	7.5	12839.3	7.5	16896.5	7.5	25773.1	7.5	25512.1	7.5	22121.4	7.5	28684.3	7.5	11295.3	7.5	30820.6	7.5	16643.1	7.5	22680	7.5	18969.5	7.5	20368.5	7.5	21800.4	7.5	14360.8	7.5	10226.7	7.5
	10	14697.7	10	7058.26	10	12122.4	10	5815.5	10	12876.8	10	20538	10	11513.7	10	16957.4	10	9530.58	10	12310.3	10	17081.5	10	27493.4	10	26056.2	10	17547.2	10	28795	10	10943.8	10	26163.7	10	12646.1	10	16848	10	14874.1	10	19985.7	10	18063.4	10	14286.4	10	11380.6	10
	12.5	13528	12.5	7967.46	12.5	10968.1	12.5	4851.09	12.5	12254.7	12.5	18357.1	12.5	12453.2	12.5	20897.5	12.5	10136.5	12.5	10865.2	12.5	13245.9	12.5	26296.6	12.5	23853.1	12.5	17249.8	12.5	21936.8	12.5	10092.3	12.5	22703.7	12.5	11170.4	12.5	15557.3	12.5	14200	12.5	19838.8	12.5	14739.2	12.5	13186.3	12.5	11395.3	12.5
	15	12949.4	15	6665.73	15	10602.7	15	5475.13	15	13374.2	15	18148.8	15	11365.1	15	18699.8	15	11095.1	15	10891.9	15	12113.7	15	23197.9	15	22768.5	15	18099.4	15	17441.7	15	9485.57	15	22631.8	15	9855.75	15	14885.3	15	14361.5	15	18868.3	15	14208.8	15	12615.6	15	12132.6	15
	17.5	12849	17.5	5903.65	17.5	10867.6	17.5	4779.17	17.5	10801.1	17.5	19159.9	17.5	11061.8	17.5	14743.8	17.5	10392.5	17.5	11437.2	17.5	11573.3	17.5	20740.2	17.5	23371.7	17.5	17756.5	17.5	15937.7	17.5	9366.96	17.5	21963	17.5	8623.36	17.5	14229.3	17.5	14236.9	17.5	17085.7	17.5	14493	17.5	12186	17.5	13482.6	17.5
	20	11020.1	20	5541.72	20	12426.7	20	4833.09	20	10583.4	20	18062.1	20	8650.74	20	14032.9	20	9424.4	20	11724.7	20	10237.7	20	21794.9	20	21995.4	20	16018	20	16557.5	20	7875.24	20	18675.7	20	8233.27	20	16456	20	18260.6	20	16317.6	20	14656.4	20	11675.3	20	12950.5	20
	22.5	12229.4	22.5	6231.58	22.5	13163.1	22.5	6383.76	22.5	8923.5	22.5	17026	22.5	7755.73	22.5	12640.6	22.5	8528.74	22.5	13859.6	22.5	10275.5	22.5	21592.6	22.5	19271.8	22.5	13486.1	22.5	17180.7	22.5	8310.63	22.5	18431.6	22.5	9147.78	22.5	17968	22.5	15737.1	22.5	16260.8	22.5	17149.1	22.5	12232	22.5	11320.3	22.5
	25	12857.4	25	5949.54	25	11754.3	25	5319.93	25	10105.6	25	17344.4	25	7502.65	25	11141.1	25	7762.46	25	17134.3	25	12402.7	25	19105.9	25	18950.9	25	14093.4	25	16193.7	25	9330.04	25	18435.1	25	11655.2	25	17093.3	25	17999.3	25	16517.7	25	17627.3	25	10801.2	25	11248.9	25
	27.5	14896.8	27.5	7106.01	27.5	10623.7	27.5	6020.46	27.5	11925	27.5	18919.7	27.5	7190.89	27.5	11657.9	27.5	8085.26	27.5	17062.7	27.5	14060.4	27.5	18319.4	27.5	20799.5	27.5	14788.5	27.5	16270.6	27.5	9961.43	27.5	17356.9	27.5	10592	27.5	16584	27.5	23444.4	27.5	16161.5	27.5	19013.3	27.5	9224.59	27.5	11180.4	27.5
	30	18636.9	30	7999.54	30	9486.13	30	8379.12	30	13052.2	30	19697.3	30	6632.19	30	11389.9	30	8912.64	30	16933.9	30	16918.5	30	18016.1	30	22750.9	30	18373.3	30	19775.9	30	11623.5	30	18863.8	30	12728.3	30	14023.1	30	24649.6	30	15756.1	30	19951.8	30	8623.4	30	12635.3	30
	32.5	20500.4	32.5	8477.87	32.5	8593.12	32.5	9067.88	32.5	15704	32.5	19608.9	32.5	7865.68	32.5	10657.6	32.5	9945.65	32.5	15292.1	32.5	18653.4	32.5	18262.4	32.5	26644.6	32.5	21310	32.5	22673.2	32.5	13463.7	32.5	21702.9	32.5	18980.2	32.5	12084	32.5	21334.1	32.5	16049.4	32.5	20665	32.5	9500.54	32.5	12980.6	32.5
	35	19911.7	35	9535.35	35	8641.29	35	7410.34	35	15385.3	35	23268.8	35	7325.69	35	11685.7	35	11974.2	35	13412.7	35	19279.3	35	17244.9	35	30900.4	35	23221	35	28016.2	35	16416.9	35	22964.1	35	19627.9	35	12759.4	35	17311	35	16643	35	18274.7	35	13735.5	35	14960.9	35
	37.5	15771.1	37.5	7545.25	37.5	9052.41	37.5	5495.09	37.5	14407.8	37.5	25584.1	37.5	8155.88	37.5	14511.7	37.5	13340.4	37.5	12159.2	37.5	16811.8	37.5	18217.7	37.5	36491.9	37.5	25012.7	37.5	34702.1	37.5	13985.3	37.5	22910.1	37.5	20417.4	37.5	12775.9	37.5	19355.7	37.5	16741.7	37.5	15374.7	37.5	14219.4	37.5	16273	37.5
	40	13304.2	40	6553.03	40	9510.77	40	4614.17	40	12495.7	40	21677.3	40	11214.9	40	15470.3	40	12282.4	40	11628.1	40	12962.6	40	19924.4	40	42574.5	40	24213.9	40	35433	40	11335.4	40	16475.3	40	17074.1	40	11275.1	40	21445.5	40	17244.2	40	13768.3	40	12910.3	40	15436.5	40
	42.5	13808.9	42.5	5184.79	42.5	11444.7	42.5	4282.09	42.5	11259.6	42.5	20538.8	42.5	12354.5	42.5	15511.9	42.5	9279.59	42.5	10111.4	42.5	12457.8	42.5	25342.2	42.5	42423.1	42.5	19098.4	42.5	31799.9	42.5	11788.5	42.5	13695.8	42.5	13737	42.5	12320	42.5	20816.3	42.5	18940.9	42.5	13699.7	42.5	12891.6	42.5	14328.8	42.5
	45	13158.6	45	5245.17	45	11777.8	45	4215.03	45	9402.64	45	19013	45	8956.96	45	14467.5	45	8087.01	45	9416.02	45	11070.6	45	27397.6	45	36790.5	45	14646.5	45	23303.4	45	10392.9	45	12662.2	45	12164.9	45	12603.1	45	17896.9	45	20684	45	11991.9	45	9614.36	45	12943.3	45
	47.5	12250.3	47.5	5843.43	47.5	10145.1	47.5	4392.28	47.5	8292.45	47.5	19724.1	47.5	8848.11	47.5	13693.4	47.5	7545.01	47.5	9098.75	47.5	10833.2	47.5	26998.3	47.5	31153.1	47.5	13298.4	47.5	19915.4	47.5	8596.82	47.5	12689.3	47.5	13216.9	47.5	13346.1	47.5	16182.5	47.5	20818.1	47.5	13177.7	47.5	8104.03	47.5	11060.6	47.5
	50	12181	50	5306.06	50	9735.52	50	4144.12	50	9200.99	50	19385.8	50	7701.87	50	13292.3	50	7058.92	50	9505.83	50	10659.1	50	32042.2	50	28400.5	50	13271.7	50	18151	50	8497.22	50	14160.6	50	11968.8	50	15372.1	50	16519.7	50	18558.4	50	13622	50	7805.69	50	8807.08	50
	52.5	14662	52.5	5935.56	52.5	9897.76	52.5	4404.36	52.5	8092.33	52.5	16367.7	52.5	8711.98	52.5	11705.4	52.5	6805.76	52.5	10539.3	52.5	11481	52.5	33075.6	52.5	29270.3	52.5	12966.2	52.5	18685.7	52.5	8926.41	52.5	14781.5	52.5	9918	52.5	15549.6	52.5	18654.3	52.5	17569.3	52.5	15849.3	52.5	7441.86	52.5	8836.02	52.5
	55	13867.2	55	6023.55	55	9602.1	55	5196.78	55	6935.57	55	12936.8	55	9696.59	55	9352.45	55	6415.48	55	12311.5	55	10766.7	55	29015	55	32457.5	55	13957	55	22873.1	55	9173.46	55	14911.9	55	10533.7	55	18958.4	55	17335.6	55	16545.3	55	17224.8	55	7731.07	55	8801.78	55
	57.5	11986.5	57.5	5042.23	57.5	10385.3	57.5	4722.28	57.5	7703.06	57.5	11301.8	57.5	9393.6	57.5	9244.64	57.5	6491.1	57.5	16306	57.5	10424.8	57.5	28254.5	57.5	31593.3	57.5	15759.4	57.5	24366.7	57.5	10093.8	57.5	17698	57.5	12566.5	57.5	20115.5	57.5	15939	57.5	16402.2	57.5	19487.8	57.5	7879.21	57.5	8577.56	57.5
	60	14552.8	60	5487.41	60	9635.16	60	4157.75	60	8622.14	60	10602	60	8374.4	60	9396.46	60	6913.89	60	12552.4	60	14024.2	60	26927.2	60	28384.1	60	19043.4	60	25509.9	60	11095	60	20965.8	60	13936.3	60	16290.2	60	16488.3	60	18252	60	20122.4	60	8734.2	60	9928.51	60
	62.5	16487.7	62.5	7095.01	62.5	8784.12	62.5	4170.13	62.5	10992.7	62.5	11108.7	62.5	8436.8	62.5	10536.5	62.5	7848.75	62.5	12855.4	62.5	14405.5	62.5	21780.3	62.5	22812.5	62.5	20416.7	62.5	27495.7	62.5	9505.71	62.5	21169	62.5	17186.3	62.5	13999.2	62.5	17470.7	62.5	20284.6	62.5	18475.8	62.5	8413.65	62.5	10186.4	62.5
	65	16258.4	65	6656.44	65	7989.66	65	4621.27	65	11093.3	65	13633.2	65	10520.5	65	10066.7	65	8607.97	65	17020	65	14337.3	65	19448.7	65	17987.1	65	20500.2	65	23906	65	9431.47	65	22235.3	65	15771.8	65	16038.1	65	13571.3	65	20497.6	65	16538.7	65	9270.91	65	11950.2	65
	67.5	16567.2	67.5	5162.17	67.5	7565.75	67.5	4630.01	67.5	9989.99	67.5	15671.5	67.5	11001.4	67.5	9938.94	67.5	8325.93	67.5	13927	67.5	18576.8	67.5	19422.5	67.5	16561.1	67.5	21471	67.5	26404.6	67.5	10412.5	67.5	22499.7	67.5	17086.7	67.5	19427.1	67.5	17420.8	67.5	19355.2	67.5	18139.5	67.5	10432.2	67.5	11521.8	67.5
	70	15870	70	4820.45	70	8589.36	70	4357.47	70	11989.8	70	15118.3	70	11199.4	70	10383.6	70	8501.01	70	14571.5	70	17282.2	70	19201.6	70	19264.6	70	24631.1	70	30408.5	70	10959.4	70	24264.3	70	17034.8	70	21287.6	70	20074	70	20315.8	70	19705.8	70	10192	70	10948.7	70
	72.5	15160.9	72.5	5962.29	72.5	9602.1	72.5	4597.31	72.5	11425.1	72.5	15582.8	72.5	9107.71	72.5	9305.53	72.5	8187.01	72.5	13346.7	72.5	14324.2	72.5	19702.4	72.5	21431.6	72.5	25640.2	72.5	30284	72.5	10907.3	72.5	24850.4	72.5	15183.2	72.5	21825.2	72.5	22417.9	72.5	21288.5	72.5	18459.3	72.5	10350.8	72.5	10788.3	72.5
	75	14854.2	75	6382.58	75	9343.82	75	4971.88	75	11997.4	75	16841.7	75	9471.92	75	10615.8	75	7547.73	75	12831	75	11637.2	75	20903.8	75	23600.2	75	26183.6	75	29595.8	75	10473.4	75	24020	75	13432.9	75	16797.8	75	18852.8	75	22409.6	75	18203	75	11039.7	75	10989.3	75
	77.5	14442.4	77.5	5848.96	77.5	9179.23	77.5	4262.84	77.5	9587.53	77.5	15391.5	77.5	9690.03	77.5	12589.5	77.5	7502.5	77.5	16985.1	77.5	12610.6	77.5	18514.7	77.5	24477	77.5	26665.5	77.5	27044.2	77.5	9754.91	77.5	25333.6	77.5	12633	77.5	17684.1	77.5	17909.2	77.5	21276.2	77.5	18243.4	77.5	10815.1	77.5	11777.8	77.5
	80	16340.5	80	6692.77	80	8966.02	80	4655.54	80	9725.8	80	14495.8	80	8897.42	80	12641.6	80	7860.8	80	17066.7	80	13753.9	80	14192.5	80	27781.7	80	27760.2	80	24199.7	80	10863.1	80	23231.4	80	14939.5	80	18388	80	19755.9	80	21112	80	21409.1	80	10839.1	80	13128	80
	82.5	18189.2	82.5	5927.46	82.5	9303.93	82.5	5312.88	82.5	10909.9	82.5	13054.5	82.5	10743.5	82.5	10828.8	82.5	8570.65	82.5	12564.2	82.5	12079.4	82.5	13290.3	82.5	30269.5	82.5	28155.5	82.5	21001.5	82.5	12599	82.5	22006.4	82.5	13529.1	82.5	15822.6	82.5	17101.3	82.5	19670.3	82.5	23693.2	82.5	11073.6	82.5	14084	82.5
	85	18931.1	85	5021.75	85	8695.76	85	5076.77	85	10300.4	85	10703.6	85	10373.3	85	9980.69	85	8859.73	85	12791.2	85	10645.7	85	14390.4	85	27995.6	85	25146.5	85	19540.9	85	11133.3	85	20864.6	85	12007.5	85	15057.5	85	14230	85	19254.7	85	20081.2	85	11521.4	85	12215.9	85
	87.5	20435.7	87.5	6152.26	87.5	9272.49	87.5	5473.89	87.5	10593.7	87.5	10114.3	87.5	9279.19	87.5	11678.1	87.5	8085.6	87.5	11052.4	87.5	9996.21	87.5	16869.8	87.5	24432.6	87.5	22446.1	87.5	19437.4	87.5	9723.63	87.5	23237	87.5	12174.1	87.5	15114.8	87.5	16315.4	87.5	19159	87.5	18471.2	87.5	9691.75	87.5	11647	87.5
	90	15900.2	90	6738.84	90	9069.48	90	8755.75	90	9369.39	90	10618.3	90	8736.94	90	11616.2	90	7215.68	90	8767.77	90	9363.28	90	18404.7	90	21151.8	90	20615.8	90	18372.8	90	8886.85	90	25360.3	90	11354.2	90	13627.4	90	18694.8	90	19123.3	90	17252.7	90	9288.58	90	8490.47	90
	92.5	13683.4	92.5	5593.61	92.5	9093.84	92.5	6805.83	92.5	8517.77	92.5	10540.9	92.5	7792.15	92.5	10064.5	92.5	6786.18	92.5	9696.98	92.5	9279.84	92.5	18140.6	92.5	22095.9	92.5	17607.1	92.5	16516.9	92.5	8165.12	92.5	27066.2	92.5	12680.2	92.5	14244.3	92.5	19601.5	92.5	19004.9	92.5	15063.8	92.5	9398.73	92.5	7478.36	92.5
	95	14089	95	5676.7	95	9085.84	95	5449.51	95	8703.96	95	9752.14	95	8384.91	95	9121.89	95	7359.47	95	12113	95	9377.12	95	18460.9	95	22593.8	95	18501.6	95	16451.6	95	7843.52	95	26917	95	10131.5	95	14361.3	95	18643.6	95	20095.8	95	15035.1	95	8452.22	95	7859.43	95
	97.5	13033.6	97.5	5688.09	97.5	8493.74	97.5	5678.26	97.5	10177.2	97.5	9290.04	97.5	10119.7	97.5	10344.6	97.5	6861.89	97.5	12762.4	97.5	10443.8	97.5	21081.9	97.5	22878.5	97.5	17467.8	97.5	16450.2	97.5	8253.55	97.5	26642.7	97.5	12273	97.5	14935.2	97.5	16812.4	97.5	19850.4	97.5	16468.5	97.5	9380.34	97.5	8600.94	97.5
	100	11747.3	100	7862.4	100	9014.23	100	5708.33	100	12349.2	100	11206.3	100	10347	100	10536	100	6625.72	100	13412.3	100	10782.8	100	19173.2	100	24304.1	100	16282.2	100	17369.7	100	8517.55	100	26465.7	100	13379.9	100	16014.3	100	19634.6	100	20225	100	16397.8	100	12278.9	100	10364.4	100
	0		0		0		0		0		0		0		0		0		0		0		0		0		0		0		0		0		0		0		0		0		0		0		0		0
	2.5	1	2.5	1	2.5	1	2.5	1	2.5	1	2.5	1	2.5	1	2.5	1	2.5	1	2.5	1	2.5	1	2.5	1	2.5	1	2.5	1	2.5	1	2.5	1	2.5	1	2.5	1	2.5	1	2.5	1	2.5	1	2.5	1	2.5	1	2.5	1	2.5
	5	0.740724	5	0.826853	5	1.01178	5	0.638733	5	1.04817	5	0.86521	5	1.01882	5	1.08424	5	0.795456	5	0.743869	5	0.913583	5	0.770764	5	0.950202	5	0.967158	5	0.925376	5	0.976594	5	0.975981	5	0.987979	5	0.974266	5	0.752531	5	0.886261	5	0.973148	5	0.91169	5	0.976245	5
	7.5	0.545944	7.5	0.803957	7.5	0.935419	7.5	0.639598	7.5	1.08738	7.5	0.868195	7.5	0.946036	7.5	1.08959	7.5	0.76252	7.5	0.635832	7.5	0.975666	7.5	0.658786	7.5	0.805364	7.5	0.811307	7.5	1.03104	7.5	1.0082	7.5	0.95118	7.5	1.09628	7.5	0.959932	7.5	0.672828	7.5	0.790463	7.5	0.89276	7.5	0.912078	7.5	1.05399	7.5
	10	0.526387	10	0.663813	10	0.868671	10	0.504718	10	0.931351	10	0.704278	10	0.983221	10	1.36694	10	0.763871	10	0.609637	10	0.986347	10	0.702759	10	0.822539	10	0.643547	10	1.03502	10	0.976825	10	0.807459	10	0.833004	10	0.713093	10	0.52757	10	0.775608	10	0.739726	10	0.907352	10	1.17292	10
	12.5	0.484495	12.5	0.749321	12.5	0.785954	12.5	0.421019	12.5	0.886353	12.5	0.62949	12.5	1.06344	12.5	1.68455	12.5	0.812438	12.5	0.538072	12.5	0.764866	12.5	0.672167	12.5	0.752992	12.5	0.63264	12.5	0.788507	12.5	0.900826	12.5	0.700679	12.5	0.735797	12.5	0.658465	12.5	0.50366	12.5	0.769906	12.5	0.603593	12.5	0.837482	12.5	1.17443	12.5
	15	0.463772	15	0.626896	15	0.759768	15	0.475178	15	0.967326	15	0.622349	15	0.970528	15	1.50739	15	0.889266	15	0.539393	15	0.699491	15	0.592961	15	0.718754	15	0.663799	15	0.626932	15	0.846667	15	0.698458	15	0.649201	15	0.630023	15	0.509388	15	0.732245	15	0.581875	15	0.801239	15	1.25042	15
	17.5	0.460178	17.5	0.555224	17.5	0.778752	17.5	0.414777	17.5	0.781217	17.5	0.65702	17.5	0.944623	17.5	1.1885	17.5	0.83295	17.5	0.5664	17.5	0.668284	17.5	0.530139	17.5	0.737796	17.5	0.651225	17.5	0.572871	17.5	0.83608	17.5	0.677818	17.5	0.568023	17.5	0.602257	17.5	0.504969	17.5	0.663064	17.5	0.593512	17.5	0.77395	17.5	1.38956	17.5
	20	0.394676	20	0.521186	20	0.890473	20	0.419456	20	0.765474	20	0.619374	20	0.738733	20	1.13119	20	0.755361	20	0.580634	20	0.591165	20	0.557099	20	0.69435	20	0.587465	20	0.595151	20	0.702931	20	0.576368	20	0.542328	20	0.696501	20	0.647685	20	0.633258	20	0.600202	20	0.741516	20	1.33472	20
	22.5	0.437985	22.5	0.586066	22.5	0.943243	22.5	0.554037	22.5	0.645417	22.5	0.583844	22.5	0.662303	22.5	1.01896	22.5	0.683574	22.5	0.686361	22.5	0.593348	22.5	0.551928	22.5	0.608372	22.5	0.494606	22.5	0.617552	22.5	0.741793	22.5	0.568832	22.5	0.602567	22.5	0.760497	22.5	0.55818	22.5	0.631052	22.5	0.702284	22.5	0.776875	22.5	1.16671	22.5
	25	0.460478	25	0.55954	25	0.842292	25	0.461709	25	0.730913	25	0.594762	25	0.640692	25	0.898086	25	0.622157	25	0.848534	25	0.716178	25	0.488365	25	0.598241	25	0.516877	25	0.582074	25	0.832785	25	0.568942	25	0.767732	25	0.723476	25	0.638416	25	0.641021	25	0.721868	25	0.686005	25	1.15935	25
	27.5	0.533516	27.5	0.668304	27.5	0.761278	27.5	0.522507	27.5	0.862507	27.5	0.648783	27.5	0.614069	27.5	0.939742	27.5	0.64803	27.5	0.844985	27.5	0.8119	27.5	0.468262	27.5	0.656596	27.5	0.542371	27.5	0.584839	27.5	0.889141	27.5	0.535667	27.5	0.6977	27.5	0.70192	27.5	0.831549	27.5	0.6272	27.5	0.778627	27.5	0.585869	27.5	1.15228	27.5
	30	0.667467	30	0.752338	30	0.679759	30	0.727211	30	0.944034	30	0.675447	30	0.566358	30	0.918141	30	0.714344	30	0.838608	30	0.976937	30	0.460509	30	0.718199	30	0.673845	30	0.710833	30	1.0375	30	0.582171	30	0.838419	30	0.59353	30	0.874298	30	0.611467	30	0.81706	30	0.547686	30	1.30224	30
	32.5	0.734204	32.5	0.797324	32.5	0.615767	32.5	0.786988	32.5	1.13583	32.5	0.672415	32.5	0.671693	32.5	0.859106	32.5	0.797139	32.5	0.757302	32.5	1.07712	32.5	0.466804	32.5	0.841116	32.5	0.78155	32.5	0.814974	32.5	1.20175	32.5	0.66979	32.5	1.25023	32.5	0.511457	32.5	0.756699	32.5	0.622848	32.5	0.846267	32.5	0.603395	32.5	1.33782	32.5
	35	0.713122	35	0.896778	35	0.619219	35	0.643132	35	1.11279	35	0.79792	35	0.62558	35	0.941988	35	0.959725	35	0.66423	35	1.11326	35	0.440798	35	0.975463	35	0.851637	35	1.00703	35	1.46534	35	0.708714	35	1.2929	35	0.540044	35	0.614005	35	0.645885	35	0.748377	35	0.872367	35	1.54191	35
	37.5	0.564829	37.5	0.709614	37.5	0.648679	37.5	0.47691	37.5	1.04208	37.5	0.877314	37.5	0.696474	37.5	1.16979	37.5	1.06922	37.5	0.602151	37.5	0.970777	37.5	0.465662	37.5	1.15197	37.5	0.917348	37.5	1.24735	37.5	1.24831	37.5	0.707049	37.5	1.3449	37.5	0.540741	37.5	0.686528	37.5	0.649714	37.5	0.62962	37.5	0.903095	37.5	1.67715	37.5
	40	0.476479	40	0.616297	40	0.681524	40	0.400456	40	0.903788	40	0.743345	40	0.957699	40	1.24706	40	0.984428	40	0.575853	40	0.748507	40	0.509287	40	1.34399	40	0.88805	40	1.27362	40	1.01178	40	0.508458	40	1.12467	40	0.477218	40	0.760649	40	0.669217	40	0.563833	40	0.819952	40	1.59093	40
	42.5	0.494553	42.5	0.487618	42.5	0.820104	42.5	0.371636	42.5	0.814381	42.5	0.704302	42.5	1.05502	42.5	1.25042	42.5	0.743755	42.5	0.50074	42.5	0.719359	42.5	0.64777	42.5	1.33921	42.5	0.700439	42.5	1.14303	42.5	1.05222	42.5	0.422678	42.5	0.904859	42.5	0.521443	42.5	0.738333	42.5	0.735061	42.5	0.561026	42.5	0.81877	42.5	1.47677	42.5
	45	0.471265	45	0.493296	45	0.843975	45	0.365816	45	0.680072	45	0.651983	45	0.764883	45	1.16622	45	0.64817	45	0.466304	45	0.63926	45	0.70031	45	1.1614	45	0.537162	45	0.837626	45	0.927655	45	0.39078	45	0.801306	45	0.533429	45	0.634785	45	0.802709	45	0.491086	45	0.610624	45	1.33398	45
	47.5	0.438736	47.5	0.549561	47.5	0.726981	47.5	0.381199	47.5	0.599775	47.5	0.676366	47.5	0.755587	47.5	1.10383	47.5	0.604729	47.5	0.450592	47.5	0.625547	47.5	0.690104	47.5	0.98344	47.5	0.487723	47.5	0.715848	47.5	0.767339	47.5	0.391615	47.5	0.870602	47.5	0.564877	47.5	0.573977	47.5	0.807914	47.5	0.539648	47.5	0.5147	47.5	1.13994	47.5
	50	0.436254	50	0.499023	50	0.69763	50	0.359661	50	0.665487	50	0.664765	50	0.657704	50	1.0715	50	0.565769	50	0.470752	50	0.615499	50	0.819031	50	0.896544	50	0.486743	50	0.652428	50	0.758448	50	0.437022	50	0.788386	50	0.650626	50	0.585937	50	0.720218	50	0.557844	50	0.495753	50	0.907686	50
	52.5	0.525108	52.5	0.558226	52.5	0.709255	52.5	0.382248	52.5	0.5853	52.5	0.561271	52.5	0.743963	52.5	0.94357	52.5	0.545478	52.5	0.521929	52.5	0.662956	52.5	0.845446	52.5	0.924002	52.5	0.475537	52.5	0.671648	52.5	0.796757	52.5	0.456184	52.5	0.653301	52.5	0.658137	52.5	0.66165	52.5	0.681832	52.5	0.649054	52.5	0.472645	52.5	0.910668	52.5
	55	0.496644	55	0.5665	55	0.688069	55	0.451021	55	0.501634	55	0.443622	55	0.828044	55	0.753901	55	0.514198	55	0.609693	55	0.621712	55	0.741651	55	1.02462	55	0.511877	55	0.822162	55	0.818808	55	0.460208	55	0.693861	55	0.802414	55	0.614877	55	0.642094	55	0.705382	55	0.491013	55	0.907139	55
	57.5	0.429286	57.5	0.47421	57.5	0.744188	57.5	0.40984	57.5	0.557145	57.5	0.387556	57.5	0.80217	57.5	0.745211	57.5	0.520259	57.5	0.807512	57.5	0.601969	57.5	0.722212	57.5	0.997336	57.5	0.577978	57.5	0.875848	57.5	0.900956	57.5	0.546192	57.5	0.827757	57.5	0.851388	57.5	0.565341	57.5	0.63654	57.5	0.798057	57.5	0.500422	57.5	0.88403	57.5
	60	0.521196	60	0.516078	60	0.690438	60	0.360844	60	0.62362	60	0.363556	60	0.715135	60	0.757449	60	0.554145	60	0.621625	60	0.809812	60	0.688284	60	0.896026	60	0.698421	60	0.916939	60	0.990325	60	0.647045	60	0.917987	60	0.689484	60	0.584823	60	0.708326	60	0.824046	60	0.554724	60	1.02326	60
	62.5	0.590495	62.5	0.667269	62.5	0.629454	62.5	0.361919	62.5	0.795076	62.5	0.380933	62.5	0.720464	62.5	0.849348	62.5	0.629073	62.5	0.636628	62.5	0.831829	62.5	0.556726	62.5	0.720145	62.5	0.748786	62.5	0.988316	62.5	0.848464	62.5	0.653314	62.5	1.13207	62.5	0.592515	62.5	0.619668	62.5	0.787209	62.5	0.756614	62.5	0.534365	62.5	1.04985	62.5
	65	0.582283	65	0.626023	65	0.572524	65	0.401073	65	0.802356	65	0.4675	65	0.898405	65	0.81148	65	0.689925	65	0.842872	65	0.827891	65	0.497128	65	0.567816	65	0.751848	65	0.859287	65	0.841837	65	0.686222	65	1.03889	65	0.678815	65	0.48136	65	0.795475	65	0.677286	65	0.588811	65	1.23163	65
	67.5	0.593343	67.5	0.48549	67.5	0.542147	67.5	0.401832	67.5	0.722553	67.5	0.537399	67.5	0.939472	67.5	0.801178	67.5	0.667319	67.5	0.689701	67.5	1.0727	67.5	0.496459	67.5	0.5228	67.5	0.787452	67.5	0.949098	67.5	0.929401	67.5	0.694381	67.5	1.12551	67.5	0.822253	67.5	0.617899	67.5	0.75114	67.5	0.742843	67.5	0.662566	67.5	1.18748	67.5
	70	0.568371	70	0.453352	70	0.615498	70	0.378178	70	0.867195	70	0.518428	70	0.956377	70	0.837019	70	0.681352	70	0.721615	70	0.997938	70	0.490811	70	0.608144	70	0.903351	70	1.09302	70	0.978215	70	0.748842	70	1.12209	70	0.901001	70	0.712003	70	0.788421	70	0.806986	70	0.647308	70	1.1284	70
	72.5	0.542975	72.5	0.56074	72.5	0.688069	72.5	0.398994	72.5	0.826353	72.5	0.534356	72.5	0.777757	72.5	0.750119	72.5	0.656185	72.5	0.66096	72.5	0.827132	72.5	0.503612	72.5	0.676551	72.5	0.94036	72.5	1.08854	72.5	0.973569	72.5	0.766929	72.5	1.00012	72.5	0.923753	72.5	0.795142	72.5	0.826168	72.5	0.755939	72.5	0.657399	72.5	1.11187	72.5
	75	0.531993	75	0.600267	75	0.669561	75	0.431502	75	0.867749	75	0.577526	75	0.808859	75	0.85574	75	0.604947	75	0.635424	75	0.671977	75	0.534322	75	0.745011	75	0.960289	75	1.06381	75	0.93484	75	0.741303	75	0.884826	75	0.710969	75	0.668689	75	0.869676	75	0.745444	75	0.70115	75	1.13259	75
	77.5	0.517242	77.5	0.550081	77.5	0.657767	77.5	0.369965	77.5	0.693445	77.5	0.527795	77.5	0.827484	77.5	1.01484	77.5	0.601322	77.5	0.841146	77.5	0.728182	77.5	0.473254	77.5	0.772688	77.5	0.977963	77.5	0.97209	77.5	0.870707	77.5	0.781842	77.5	0.832142	77.5	0.748479	77.5	0.635221	77.5	0.825689	77.5	0.747097	77.5	0.686885	77.5	1.21386	77.5
	80	0.585222	80	0.62944	80	0.642489	80	0.404047	80	0.703445	80	0.497081	80	0.759799	80	1.01904	80	0.630039	80	0.845184	80	0.794202	80	0.362774	80	0.877011	80	1.01811	80	0.869845	80	0.969626	80	0.716962	80	0.984069	80	0.778273	80	0.700722	80	0.819319	80	0.876739	80	0.688411	80	1.35301	80
	82.5	0.651433	82.5	0.557464	82.5	0.666703	82.5	0.461097	82.5	0.789085	82.5	0.447658	82.5	0.917449	82.5	0.872907	82.5	0.686933	82.5	0.622211	82.5	0.697507	82.5	0.339713	82.5	0.955545	82.5	1.03261	82.5	0.754887	82.5	1.12457	82.5	0.679158	82.5	0.891168	82.5	0.669693	82.5	0.606566	82.5	0.763369	82.5	0.970276	82.5	0.703305	82.5	1.45154	82.5
	85	0.678002	85	0.472284	85	0.623123	85	0.440605	85	0.745007	85	0.367042	85	0.885829	85	0.804543	85	0.710103	85	0.633452	85	0.614721	85	0.367832	85	0.883762	85	0.922253	85	0.702388	85	0.993739	85	0.64392	85	0.79094	85	0.63731	85	0.504726	85	0.747242	85	0.822359	85	0.731741	85	1.25901	85
	87.5	0.731888	87.5	0.578606	87.5	0.66445	87.5	0.475071	87.5	0.766221	87.5	0.346834	87.5	0.7924	87.5	0.941369	87.5	0.648057	87.5	0.547342	87.5	0.577218	87.5	0.431209	87.5	0.771288	87.5	0.823214	87.5	0.698666	87.5	0.867916	87.5	0.717137	87.5	0.801913	87.5	0.639735	87.5	0.578691	87.5	0.743527	87.5	0.756426	87.5	0.615539	87.5	1.20038	87.5
	90	0.569454	90	0.633773	90	0.649902	90	0.759898	90	0.677667	90	0.364117	90	0.746094	90	0.936383	90	0.578333	90	0.434201	90	0.540671	90	0.470442	90	0.667719	90	0.75609	90	0.660399	90	0.793226	90	0.782667	90	0.747901	90	0.57678	90	0.663086	90	0.742141	90	0.706527	90	0.589933	90	0.875055	90
	92.5	0.490059	92.5	0.526066	92.5	0.651648	92.5	0.590667	92.5	0.616071	92.5	0.361462	92.5	0.665413	92.5	0.811296	92.5	0.543909	92.5	0.480218	92.5	0.535853	92.5	0.46369	92.5	0.697523	92.5	0.645745	92.5	0.593689	92.5	0.728805	92.5	0.835312	92.5	0.835249	92.5	0.602892	92.5	0.695244	92.5	0.737547	92.5	0.616885	92.5	0.596929	92.5	0.770744	92.5
	95	0.504587	95	0.53388	95	0.651075	95	0.472954	95	0.629538	95	0.334414	95	0.716032	95	0.735316	95	0.589858	95	0.599864	95	0.54147	95	0.471879	95	0.713241	95	0.678549	95	0.591343	95	0.7001	95	0.830709	95	0.667365	95	0.607845	95	0.661269	95	0.779882	95	0.615713	95	0.536814	95	0.810017	95
	97.5	0.466787	97.5	0.534952	97.5	0.608646	97.5	0.492808	97.5	0.736096	97.5	0.318569	97.5	0.864172	97.5	0.833876	97.5	0.549977	97.5	0.632025	97.5	0.603067	97.5	0.538874	97.5	0.722229	97.5	0.640634	97.5	0.591293	97.5	0.736698	97.5	0.822243	97.5	0.808429	97.5	0.632133	97.5	0.596318	97.5	0.770358	97.5	0.67441	97.5	0.595761	97.5	0.88644	97.5
	100	0.420719	100	0.73944	100	0.645943	100	0.495417	100	0.893188	100	0.384279	100	0.883587	100	0.849311	100	0.531048	100	0.664207	100	0.622641	100	0.490087	100	0.767231	100	0.597155	100	0.624345	100	0.760262	100	0.816779	100	0.881338	100	0.677806	100	0.696421	100	0.784896	100	0.671518	100	0.779852	100	1.06819	100
[truncated: 13 more columns]

## Sheet: Summary
% Chromosome Length		Mean	STDDEV	SEM		Mean	STDDEV	SEM
2.5	IF	1	0	0	FISH	196.022	22.2517	4.13203
5		0.901566	0.125409	0.0232878		198.026	26.1049	4.84756
7.5		0.879922	0.164156	0.0304831		203.96	28.3294	5.26064
10		0.824986	0.203513	0.0377915		210.149	38.5427	7.15721
12.5		0.769938	0.242797	0.0450862		225.366	70.562	13.103
15		0.742425	0.229616	0.0426386		250.601	118.755	22.0522
17.5		0.707252	0.212555	0.0394705		299.662	234.918	43.6232
20		0.701412	0.20014	0.0371652		357.877	337.147	62.6065
22.5		0.695312	0.163528	0.0303663		426.427	386.601	71.79
25		0.691412	0.151904	0.0282079		535.948	386.984	71.8611
27.5		0.726356	0.161261	0.0299454		708.661	479.657	89.07
30		0.776919	0.189745	0.0352348		893.499	479.537	89.0478
32.5		0.850454	0.23032	0.0427694		1066.68	448.509	83.286
35		0.888979	0.279951	0.0519856		1184.72	517.92	96.1753
37.5		0.881028	0.306371	0.0568916		1162.07	532.474	98.8779
40		0.833199	0.302117	0.0561017		1048.76	523.984	97.3014
42.5		0.795885	0.297075	0.0551654		836.549	487.221	90.4746
45		0.708254	0.236936	0.0439979		611.13	376.76	69.9626
47.5		0.654995	0.188858	0.03507		457.986	302.456	56.1647
50		0.643163	0.155137	0.0288082		353.73	218.748	40.6205
52.5		0.647431	0.141025	0.0261878		300.582	177.546	32.9695
55		0.649442	0.149055	0.0276789		261.471	141.15	26.2109
57.5		0.686344	0.161813	0.0300479		242.373	121.345	22.5332
60		0.718824	0.171004	0.0317546		228.816	97.8903	18.1778
62.5		0.713892	0.183442	0.0340644		215.558	71.2483	13.2305
65		0.723066	0.191889	0.0356329		208.906	63.8571	11.858
67.5		0.766005	0.210682	0.0391226		201.64	48.8785	9.07651
70		0.76756	0.194279	0.0360767		199.726	46.3006	8.59781
72.5		0.755745	0.172513	0.0320349		197.666	46.1915	8.57754
75		0.763285	0.177772	0.0330115		195.702	46.0241	8.54645
77.5		0.7483	0.191159	0.0354974		193.846	45.4689	8.44336
80		0.764729	0.208976	0.0388058		191.794	42.8108	7.94977
82.5		0.756244	0.215863	0.0400847		191.06	42.0588	7.81012
85		0.70634	0.192252	0.0357003		190.352	41.1985	7.65036
87.5		0.696171	0.184228	0.0342102		189.487	41.9193	7.78423
90		0.66381	0.139713	0.025944		187.217	42.1233	7.82211
92.5		0.626735	0.125121	0.0232343		185.137	35.3219	6.5591
95		0.619221	0.114751	0.0213087		182.622	34.5687	6.41925
97.5		0.643001	0.142325	0.026429		181.358	33.4242	6.20672
100		0.687971	0.166934	0.0309989		181.483	29.7157	5.51807
