# Supplementary material for: Large domains of heterochromatin direct the formation of short mitotic chromosome loops
Source: eLife. 2020 Sep 11;9:e57212. doi: 10.7554/eLife.57212 (PMC7515631; doi:10.7554/eLife.57212)
Supplement: Figure 5—source data 1. [file elife-57212-fig5-data1.xlsx]

## Sheet: All Values
3	FISH		PI	5	FISH		PI	7	FISH		PI	8	FISH		PI	10	FISH		PI	11	FISH		PI	12	FISH		PI	14	FISH		PI	15	FISH		PI	`16	FISH		PI	17	FISH		PI	18	FISH		PI	19	FISH
X	Y	X	Y	X	Y	X	Y	X	Y	X	Y	X	Y	X	Y	X	Y	X	Y	X	Y	X	Y	X	Y	X	Y	X	Y	X	Y	X	Y	X	Y	X	Y	X	Y	X	Y	X	Y	X	Y	X	Y	X	Y
0	1	0	209	0	5	0	170	0	2	0	119	0	4	0	127	0	2	0	201	0	6	0	201	0	4	0	141	0	3	0	176	0	2	0	186	0	3	0	250	0	6	0	178	0	1	0	148	0	1
1	1	1	215.027	1	6.646	1	169.496	1	2	1	138.827	1	3.524	1	136.351	1	2.625	1	199.81	1	3.919	1	205.975	1	3.055	1	143.687	1	3	1	178.156	1	2.336	1	179.601	1	3	1	245.16	1	6.998	1	186.92	1	1	1	155.689	1	1.967
2	1	2	215.169	2	7.315	2	170.946	2	2.587	2	149.131	2	3.049	2	154.413	2	3.14	2	194.675	2	3	2	205.698	2	3	2	146.086	2	3	2	178.321	2	1.789	2	179.832	2	3.68	2	229.36	2	7	2	195.097	2	1	2	157.059	2	2
3	1	3	194.742	3	6.527	3	165.718	3	3	3	155.703	3	2.289	3	161.597	3	3.874	3	192.331	3	3.024	3	200.956	3	2.723	3	140.767	3	2.645	3	171.183	3	1.184	3	183.42	3	4	3	215.84	3	6.192	3	193.885	3	1	3	161.137	3	2.688
4	1	4	173.76	4	5.073	4	151.423	4	3.174	4	154.385	4	2	4	163.881	4	4.499	4	193.802	4	4.388	4	193.674	4	2.297	4	138.926	4	2	4	167.644	4	1.08	4	192.826	4	4.12	4	205.8	4	5.257	4	183.579	4	1	4	171.421	4	3.884
5	1	5	153.021	5	4.068	5	144.835	5	4.01	5	145.358	5	1.86	5	159.727	5	5.123	5	193.429	5	4.824	5	185.828	5	2	5	140.631	5	2	5	163.792	5	0.291	5	195.603	5	4	5	200	5	5.312	5	171.366	5	1	5	178.013	5	4.88
6	1	6	135.033	6	3.082	6	139.387	6	6.174	6	137.701	6	1.249	6	146.394	6	5.748	6	189.898	6	4.534	6	180.005	6	2.191	6	138.767	6	2	6	158.54	6	0	6	193.338	6	5.6	6	208.16	6	5.374	6	156.297	6	1.503	6	195.322	6	6.225
7	1	7	120.914	7	2.095	7	129.5	7	7.814	7	129.938	7	1.326	7	131.116	7	5.826	7	185.128	7	3.253	7	181.153	7	2.347	7	129.457	7	2.675	7	155.923	7	0	7	186.162	7	7.2	7	199.6	7	3.464	7	141.396	7	2.175	7	204.154	7	11.062
8	1	8	111.329	8	2	8	121.584	8	8.867	8	119.964	8	1.575	8	119.457	8	5.249	8	177.801	8	3.352	8	179.479	8	3.98	8	115.609	8	3.914	8	151.4	8	0	8	172.885	8	8.08	8	188.96	8	2.515	8	116.888	8	2.735	8	194.267	8	15.128
9	1.358	9	104.302	9	2.878	9	117.01	9	8.517	9	112.086	9	1.147	9	110.726	9	5.423	9	158.169	9	3.986	9	171.202	9	7.309	9	104.213	9	5.63	9	145.114	9	0	9	157.67	9	7.08	9	179.08	9	2.561	9	102.807	9	2.024	9	175.358	9	13.807
10	1.921	10	101.047	10	3	10	110.616	10	8.846	10	105.963	10	1.037	10	100.031	10	6.37	10	138.837	10	3.609	10	171.242	10	12.096	10	93.8336	10	5.755	10	137.401	10	0	10	148.189	10	6	10	174	10	3.604	10	95.886	10	1.407	10	161.663	10	9.011
11	1.424	11	96.235	11	3	11	106.18	11	9.318	11	104.554	11	1.941	11	81.568	11	5.539	11	131.215	11	3.705	11	171.592	11	13.906	11	84.8929	11	4.848	11	126.892	11	0	11	146.399	11	4.48	11	163.72	11	5.95	11	84.556	11	0.944	11	147.384	11	6.474
12	1	12	89.07	12	3	12	104.272	12	12.459	12	102.161	12	1.863	12	70.39	12	4.813	12	131.509	12	3.894	12	174.609	12	11.082	12	82.8717	12	3.835	12	124.981	12	0	12	148.268	12	3.32	12	156.6	12	9.175	12	84.988	12	0.169	12	141.545	12	12.481
13	1	13	86.748	13	3	13	105.831	13	15.358	13	99.1521	13	1.109	13	61.979	13	4.867	13	129.375	13	3.102	13	176.769	13	6.752	13	77.8722	13	2.797	13	126.909	13	0	13	149.643	13	3	13	158.36	13	11.929	13	98.402	13	0.46	13	130.876	13	26.719
14	0.812	14	87.732	14	3	14	108.297	14	15.928	14	94.1326	14	1.004	14	53.463	14	4.763	14	130.728	14	2.377	14	177.193	14	3.691	14	78.296	14	2.012	14	131.014	14	0	14	153.664	14	3.32	14	156.16	14	12.726	14	105.069	14	0.44	14	128.988	14	37.861
15	0	15	93.329	15	3.138	15	106.2	15	13.494	15	91.8082	15	1	15	55.19	15	4.922	15	131.186	15	1.966	15	177.743	15	1.69	15	79.6643	15	2.067	15	127.867	15	0	15	152.551	15	4	15	143	15	8.988	15	96.891	15	0.466	15	131.524	15	34.827
16	0	16	100.028	16	3.355	16	96.6629	16	8.967	16	100.23	16	1.46	16	63.146	16	5.499	16	132.983	16	1.297	16	177.659	16	1.089	16	83.8238	16	2.51	16	124.863	16	0	16	141.378	16	2.92	16	134.12	16	4.154	16	96.012	16	0	16	130.692	16	20.475
17	0	17	109.223	17	3.463	17	93.6123	17	4.987	17	99.91	17	2	17	76.64	17	4.725	17	132.591	17	1.535	17	180.589	17	1.291	17	86.4706	17	3	17	125.868	17	0	17	133.016	17	2	17	119.88	17	2.979	17	99.759	17	0	17	124.683	17	6.848
18	0	18	115.842	18	3.037	18	94.042	18	1.832	18	94.6228	18	1.811	18	89.374	18	4.287	18	132.492	18	1.379	18	180.43	18	1.432	18	85.5228	18	3.262	18	129.658	18	0.045	18	125.24	18	1.68	18	104.52	18	8.193	18	96.267	18	0	18	118.048	18	1.089
19	0	19	113.217	19	3	19	95.1384	19	1.009	19	91.9634	19	1	19	94.993	19	4.979	19	142.732	19	2.036	19	183.813	19	1.188	19	83.9013	19	3.98	19	138.214	19	1	19	121.248	19	1.12	19	92.36	19	24.766	19	96.417	19	0	19	115.586	19	0
20	0	20	108.327	20	3	20	96.7748	20	2.041	20	87.1934	20	1.033	20	95.205	20	5.494	20	139.27	20	2	20	182.822	20	1.801	20	84.0691	20	4.119	20	143.755	20	1.186	20	122.606	20	1	20	84	20	52.433	20	93.841	20	0	20	114.902	20	0
21	0	21	103.991	21	3	21	95.3807	21	4.995	21	87.9233	21	1.01	21	86.242	21	6.351	21	130.262	21	1.971	21	179.738	21	2.423	21	81.3828	21	4.006	21	149.061	21	3.346	21	116.631	21	1	21	74.08	21	72.083	21	95.254	21	0	21	111.405	21	0
22	0	22	105.678	22	3	22	93.1033	22	12.289	22	92.1082	22	1	22	79.042	22	6.078	22	124.078	22	1.382	22	170.734	22	3.004	22	78.1006	22	4	22	151.471	22	7.07	22	109.205	22	1	22	66.68	22	84.587	22	103.63	22	0	22	110.953	22	0
23	0	23	107.891	23	3	23	94.4251	23	22.73	23	99.7285	23	1	23	78.25	23	4.672	23	127.675	23	1	23	160.28	23	3	23	74.2926	23	4.052	23	144.322	23	12.417	23	100.479	23	1.4	23	58.36	23	98.531	23	104.581	23	0	23	104.785	23	0
24	0	24	112.017	24	3	24	97.77	24	25.674	24	103.112	24	1	24	80.022	24	3.266	24	126.054	24	1	24	161.297	24	3	24	75.907	24	4.837	24	134.945	24	18.722	24	92.511	24	2.52	24	51.08	24	124.209	24	104.988	24	0.11	24	99.659	24	0
25	0	25	113.764	25	2.739	25	96.6016	25	22.167	25	102.683	25	1.295	25	84.052	25	2.183	25	126.438	25	1	25	157.417	25	3.163	25	75.2246	25	5.306	25	127.925	25	25.216	25	89.548	25	3	25	47	25	172.336	25	108.624	25	0	25	98.312	25	0
26	0	26	110.259	26	2.708	26	93.7324	26	10.608	26	102.266	26	1.881	26	84.7	26	1.97	26	132.878	26	1	26	149.811	26	2.772	26	78.2831	26	5.482	26	127.518	26	34.051	26	91.106	26	3.92	26	45.08	26	227.045	26	104.259	26	0	26	101.092	26	0
27	0	27	112.025	27	2.039	27	92.075	27	3.273	27	97.8869	27	2	27	82.886	27	1.757	27	135.085	27	1.004	27	142.605	27	2.171	27	83.1713	27	4.026	27	130.916	27	53.679	27	97.563	27	4.48	27	45.2	27	238.28	27	101.806	27	0	27	101.024	27	0
28	0	28	119.057	28	1.37	28	96.3224	28	0	28	91.4859	28	1.982	28	85.591	28	1.585	28	133.069	28	1.584	28	139.284	28	2.152	28	86.3074	28	3.015	28	126.531	28	87.951	28	96.649	28	3.8	28	46.24	28	206.374	28	104.091	28	0.434	28	93.219	28	0
29	0	29	122.718	29	0.701	29	101.456	29	0	29	88.7256	29	1.398	29	83.958	29	1.261	29	127.07	29	1.599	29	135.759	29	1.997	29	89.7722	29	3	29	123.617	29	129.613	29	91.253	29	2.4	29	48.84	29	146.035	29	110.101	29	2.032	29	92.883	29	0
30	0	30	122.42	30	0.032	30	106.221	30	0	30	89.6641	30	1	30	82.638	30	1	30	119.821	30	1.978	30	127.39	30	0.989	30	88.2575	30	2.957	30	121.145	30	169.071	30	86.984	30	1	30	52	30	75.596	30	111.341	30	6.275	30	95.145	30	1.631
31	0.431	31	118.725	31	0	31	109.672	31	0	31	94.8434	31	1	31	79.861	31	1	31	118.112	31	2.531	31	116.395	31	0.409	31	90.9738	31	3.122	31	118.442	31	190.987	31	87.344	31	0.08	31	53.32	31	28.253	31	114.584	31	11.342	31	99.012	31	7.564
32	0.998	32	114.196	32	0	32	117.233	32	0.186	32	102.066	32	1	32	73.259	32	1.325	32	120.078	32	2.325	32	118.426	32	0.043	32	91.1227	32	3.288	32	113.268	32	180.167	32	90.199	32	0	32	54.32	32	11.907	32	115.014	32	14.804	32	110.17	32	23.333
33	2.98	33	107.599	33	0	33	117.366	33	3.003	33	107.981	33	1	33	65.502	33	2.31	33	120.689	33	2.967	33	121.26	33	0	33	88.8853	33	3.049	33	118.699	33	130.176	33	96.184	33	0	33	58.24	33	6.541	33	115.791	33	20.417	33	119.179	33	57.334
34	5.602	34	105.902	34	0	34	119.893	34	19.704	34	110.012	34	1	34	62.206	34	3.165	34	123.837	34	3	34	121.737	34	0	34	91.8716	34	2	34	129.819	34	78.926	34	107.557	34	0.8	34	62.12	34	3.925	34	113.043	34	37.304	34	120.765	34	118.635
35	9.677	35	106.857	35	0	35	116.121	35	70.456	35	116.508	35	0.974	35	63.243	35	3.386	35	129.261	35	2.821	35	122.253	35	0	35	98.8399	35	1.676	35	124.209	35	45.799	35	119.132	35	3	35	67	35	1.219	35	104.617	35	79.944	35	112.742	35	186.262
36	17.251	36	106.048	36	0	36	107.123	36	153.129	36	120.964	36	0.275	36	65.438	36	2.949	36	130.669	36	2.181	36	120.842	36	0.344	36	104.392	36	1.229	36	120.019	36	25.325	36	123.183	36	3.806	36	74.143	36	0.17	36	103.044	36	152.02	36	105.665	36	227.861
37	28.539	37	111.098	37	4.08	37	106.752	37	210.126	37	121.058	37	0	37	65.7	37	2.032	37	132.666	37	1.541	37	114.189	37	2.155	37	106.892	37	1	37	119.554	37	13.075	37	122.077	37	4.725	37	74.314	37	0.041	37	98.204	37	223.62	37	104.649	37	228.448
38	42.098	38	122.245	38	18.998	38	111.749	38	226.56	38	117.8	38	0	38	72.95	38	1.666	38	128.59	38	1	38	109.281	38	8.156	38	103.403	38	1.095	38	117.437	38	6.257	38	123.81	38	6.937	38	68.719	38	0	38	93.613	38	247.289	38	105.102	38	191.842
39	60.122	39	132.713	39	47.44	39	115.962	39	208.32	39	113.52	39	0	39	83.447	39	0.845	39	129.532	39	1	39	101.746	39	24.629	39	98.0227	39	1	39	119.69	39	2.904	39	128.862	39	10.433	39	66.484	39	0	39	93.55	39	193.774	39	106.442	39	161.24
40	87.575	40	135.457	40	79.549	40	124.795	40	147.72	40	112.72	40	0	40	86.692	40	0.471	40	129.167	40	1	40	96.825	40	61.167	40	94.3011	40	1	40	122.155	40	1.453	40	132.171	40	16.092	40	65.415	40	0	40	91.787	40	122.19	40	113.076	40	166.871
41	115.535	41	135.161	41	93.393	41	132.749	41	80.28	41	115.24	41	0	41	82.982	41	0.519	41	127.739	41	1	41	95	41	122.896	41	94.0192	41	1.405	41	120.665	41	0.897	41	129.673	41	24.344	41	67.282	41	0	41	85.894	41	67.981	41	112.385	41	171.406
42	130.193	42	131.522	42	90.571	42	140.567	42	33.52	42	116.48	42	0	42	78.317	42	0	42	126.615	42	0.609	42	93.413	42	186.008	42	92.9274	42	2	42	120.193	42	0.769	42	123.646	42	39.065	42	67.449	42	0	42	84.662	42	34.236	42	107.959	42	140.106
43	110.245	43	120.766	43	96.85	43	143.212	43	10.6	43	120.4	43	0	43	76.052	43	0	43	126.414	43	0	43	89.117	43	217.482	43	91.4226	43	2	43	121.29	43	0.331	43	119.803	43	54.093	43	61.058	43	0	43	85.376	43	14.089	43	103.767	43	96
44	88.052	44	117.068	44	127.262	44	143.613	44	2.28	44	128.24	44	0	44	78.92	44	0	44	123.499	44	0	44	83.395	44	192.964	44	95.0617	44	2	44	121.904	44	0	44	117.396	44	65.411	44	56.105	44	0	44	84.93	44	4.591	44	95.178	44	60.231
45	73.895	45	116.728	45	171.993	45	148.985	45	0.24	45	128.76	45	0	45	79.657	45	0	45	123.078	45	0	45	83.718	45	125.033	45	100.406	45	2	45	125.128	45	0	45	112.119	45	78.783	45	54.059	45	0.692	45	87.029	45	0.77	45	95.395	45	36.181
46	74.605	46	116.021	46	196.486	46	155.951	46	1.48	46	129.44	46	0	46	80.287	46	0	46	120.822	46	0	46	87.252	46	75.984	46	105.59	46	2.053	46	124.234	46	0	46	107.771	46	122.052	46	55.594	46	1.705	46	91.095	46	0	46	96.811	46	15.869
47	67.587	47	119.433	47	184.199	47	155.149	47	3.96	47	134.72	47	0	47	83.454	47	0	47	127.346	47	0	47	92.728	47	35.118	47	108.641	47	3.013	47	119.785	47	0.303	47	104.618	47	165.98	47	57.707	47	2	47	92.198	47	0	47	105.671	47	4.659
48	50.426	48	122.464	48	156.832	48	152.487	48	7.72	48	136.76	48	0	48	87.816	48	0	48	130.556	48	0	48	101.417	48	11.989	48	105.745	48	3.743	48	118.482	48	0.519	48	100.465	48	172.538	48	66.916	48	2	48	91.876	48	0	48	108.347	48	0.785
49	23.899	49	121.05	49	140.08	49	152.245	49	10.294	49	135.47	49	0	49	87.067	49	0	49	123.85	49	0	49	105.708	49	2.613	49	106.066	49	5.452	49	118.364	49	0.478	49	98.379	49	130.72	49	78.083	49	2	49	89.946	49	0	49	118.491	49	0.2
50	10.568	50	118.737	50	131.465	50	144.664	50	9.87	50	133.019	50	0	50	82.513	50	0	50	121.49	50	1.315	50	104.436	50	0.165	50	109.11	50	9.485	50	120.133	50	0.436	50	99.355	50	65.055	50	89.63	50	1.858	50	82.209	50	0	50	124.466	50	0.003
51	6.07	51	116.422	51	114.89	51	135.217	51	7.073	51	132.886	51	0	51	84.93	51	0	51	117.146	51	3.399	51	107.672	51	0.999	51	114.213	51	15.451	51	125.227	51	0.182	51	101.087	51	55.955	51	100.339	51	1.406	51	76.426	51	0	51	122.696	51	0
52	3.535	52	116.795	52	85.846	52	131.997	52	4.764	52	131.829	52	0	52	84.546	52	0	52	113.683	52	6.063	52	112	52	0.974	52	121.696	52	22.143	52	127.406	52	0	52	104.25	52	55.44	52	105.069	52	1.164	52	73.006	52	0	52	116.799	52	0
53	0.937	53	116.585	53	59.477	53	136.711	53	3.999	53	129.863	53	0	53	82.979	53	0	53	114.534	53	8.941	53	113.971	53	0.854	53	125.942	53	24.016	53	122.658	53	0	53	108.925	53	50.564	53	112.744					53	0.2	53	111.932	53	0.908
54	0.012	54	111.764	54	63.617	54	142.056	54	3.779	54	128.465	54	0.327	54	77.349	54	0	54	121.166	54	10.408	54	113.296	54	0	54	128.323	54	19.324	54	112.528	54	0	54	113.359	54	46.333	54	122.12					54	1	54	112.175	54	1
55	0	55	106.402	55	100.863	55	141.778	55	2.319	55	122.083	55	4.363	55	72.997	55	0.129	55	120.988	55	10.081	55	114.558	55	0	55	134.352	55	9.819	55	104.405	55	0	55	114.742	55	40.918	55	133.305					55	1	55	107.118	55	1
56	1.809	56	100.707	56	138.151	56	141.195	56	2.076	56	118.228	56	12.311	56	66.11	56	2.217	56	117.128	56	7.841	56	115.666	56	0	56	125.55	56	2.573	56	99.3072	56	0.434	56	111.675	56	30.092	56	136.4					56	0.173	56	92.967	56	1
57	9.602	57	91.328	57	150.009	57	152.339	57	2	57	114.414	57	23.979	57	65.001	57	6.019	57	119.073	57	7.854	57	117.578	57	0	57	118.881	57	0.819	57	100.345	57	0.856	57	107.917	57	16.691	57	130.89					57	0.319	57	88.117	57	1
58	17.615	58	85.135	58	112.918	58	144.244	58	2.743	58	112.319	58	43.201	58	68.947	58	17.258	58	120.486	58	11.182	58	117.443	58	0	58	109.288	58	0.495	58	105.017	58	0.897	58	106.794	58	7.965	58	131.006					58	0.338	58	84.334	58	0.973
59	17.943	59	86.007	59	61.7	59	135.817	59	3.292	59	108.854	59	74.928	59	70.737	59	51.678	59	121.898	59	18.805	59	127.182	59	0.625	59	99.2034	59	1.23	59	106.797	59	0.939	59	104.193	59	3.667	59	131.705					59	0.156	59	81.854	59	0.123
60	10.856	60	93.426	60	19.259	60	126.28	60	3.189	60	108.836	60	119.576	60	73.136	60	112.539	60	128.218	60	28.524	60	135.465	60	1	60	94.0929	60	4.81	60	103.326	60	0.98	60	100.28	60	2.022	60	130.029					60	0	60	83.892	60	0
61	3.435	61	105.904	61	3.912	61	120.024	61	2.639	61	115.217	61	162.758	61	80.387	61	163.942	61	135.916	61	34.287	61	133.242	61	1	61	93.6091	61	14.828	61	100.016					61	1.473	61	126.219					61	0.051	61	85.789	61	0
62	1	62	118.959	62	1.349	62	117.911	62	2.456	62	122.171	62	190.184	62	76.53	62	189.68	62	140.028	62	32.684	62	126.86	62	1	62	94.4435	62	33.148	62	99.2619					62	2.094	62	122.427					62	0.755	62	86.77	62	0
63	1	63	125.474	63	1	63	117.848	63	2.46	63	123.985	63	196.443	63	72.882	63	198.653	63	139.287	63	29.223	63	120.576	63	1	63	99.0482	63	56.742	63	94.7749					63	3.389	63	118.761					63	1	63	89.1	63	0
64	1	64	126.157	64	0.714	64	115.769					64	173.549	64	73.699	64	226.796	64	146.957	64	28.117	64	113.525	64	1	64	106.33	64	85.766	64	95.4852					64	5.571	64	116.131					64	1	64	92.415	64	0
65	1	65	125.31	65	1.311	65	110.635					65	109.73	65	80.69	65	239.14	65	147.396	65	28.62	65	104.045	65	1	65	105.57	65	111.522	65	105.622					65	5.053	65	111.32					65	1.761	65	95.918	65	0
66	0.948	66	120.347	66	3.368	66	110.792					66	59.806	66	83.158	66	195.365	66	142.886	66	37.343	66	97.05	66	1.81	66	103.38	66	124.897	66	115.002					66	3.658	66	107.387					66	2	66	96.554
67	0.768	67	121.952	67	4.835	67	110.227					67	29.762	67	83.345	67	126.891	67	135.981	67	58.97	67	94.469	67	2	67	100.57	67	116.631	67	120.88					67	1.652	67	106.013					67	2	67	96.267
68	1	68	123.84	68	4.044	68	108.183					68	16.834	68	86.238	68	96.845	68	130.216	68	97.157	68	93.278	68	2.81	68	98.38	68	95.972	68	120.002					68	1	68	104.44					68	1.666	68	95.003
69	1	69	120.758	69	2.871	69	97.1491					69	10.693	69	93.705	69	73.497	69	130.95	69	126.913	69	91.253	69	3	69	98	69	68.009	69	112.852					69	0.999	69	105.444
70	1	70	110.624	70	1.989	70	83.7905					70	4.739	70	97.595	70	65.515	70	123.024	70	128.676	70	91.264	70	3	70	97.19	70	50.731	70	101.791					70	0.486	70	104.298
				71	1.4	71	82.8384					71	0.771	71	98.555	71	49.397	71	115.168	71	103.926	71	87.443	71	3.81	71	92.95	71	34.73	71	92.8812					71	0.87	71	100.73
				72	1.142	72	87.4059					72	0.029	72	91.12	72	24.579	72	112.84	72	66.723	72	84.248	72	3.19	72	90.38	72	23.866	72	84.4818					72	1.407	72	99.75
				73	1.903	73	95.2583					73	0	73	95.977	73	8.301	73	112.382	73	39.711	73	85.846					73	14.548	73	81.3737					73	2.311	73	98.323
				74	2	74	105.68					74	0	74	99.64	74	2.15	74	107.925	74	21.474	74	92.882					74	6.148	74	81.7871					74	4.002	74	97.437
				75	2	75	115.894					75	0	75	96.305	75	0.44	75	108.754	75	7.817	75	98.826					75	1.092	75	83.9539					75	5.511	75	94.974
				76	2	76	123.307					76	0	76	97.204	76	0	76	115.367	76	1	76	100.357					76	0	76	86.261					76	7.134	76	95.254
				77	2.802	77	127.227					77	0	77	94.222	77	0	77	117.856	77	0.022	77	100.201					77	0	77	89.6912					77	6.726	77	96.004
				78	3	78	126.412					78	0	78	88.558	78	0	78	113.088	78	0	78	100.351					78	0.267	78	92.1365					78	5.062	78	95.7
												79	0	79	79.216	79	0	79	108.314	79	0	79	99.216					79	4.695	79	94.393					79	3.813	79	90.504
												80	0	80	75.322	80	0	80	99.736	80	0	80	100.658					80	16.016	80	97.6956					80	4.729	80	82.013
												81	0	81	73.265					81	0	81	104.811					81	30.109	81	96.4669
												82	0	82	70.161					82	0	82	108.386					82	35.508	82	90.3886
												83	0	83	64.112					83	0	83	110.446					83	26.203	83	89.9865
												84	0	84	63.725					84	0	84	109.939					84	14.533	84	95.3506
												85	0	85	68.596					85	0	85	107.725					85	6.133	85	95.6797
												86	0.039	86	72.464					86	0	86	107.007					86	1.979	86	94.4269
												87	0.848	87	71.788					87	0.065	87	110.881					87	2.947	87	90.7981
												88	1	88	69.093					88	0.684	88	113.11					88	4.238	88	87.6734
												89	1	89	72.06					89	0.993	89	112.133					89	4.161	89	86.6158
												90	1	90	76.251					90	1	90	113.281					90	3.677	90	84.5059
												91	1	91	76.906					91	1.014	91	111.689					91	3.114	91	83.2738
												92	1	92	75.377					92	1.351	92	110.037					92	4.036	92	84.2667
												93	1	93	73.559					93	2	93	107.288					93	4.435	93	85.3948
												94	1	94	67.998					94	2.028	94	106.335					94	4.834	94	78.9926
												95	1	95	66.03					95	2.605	95	112.434					95	4.52	95	80.4358
												96	1	96	67.395					96	2.749	96	116.855					96	3.451	96	87.6461
												97	1	97	68.903					97	3.804	97	115.496					97	3	97	94.852
												98	1	98	65.643					98	3.872	98	107.647					98	3	98	101.98
												99	1	99	61.09													99	3	99	110.809
												100	1	100	55.643													100	3	100	119.311
												101	1	101	57.521													101	3	101	123.859
												102	1	102	62.177													102	3	102	124.569
												103	1	103	63.308													103	3	103	124.622
												104	1	104	61.26													104	3	104	126.853
												105	1	105	60.035
												106	1	106	59.974
												107	1	107	61.294
												108	1	108	57.698
												109	1	109	51.639
												110	1	110	51.282
												111	1	111	51.627
[truncated: 82 more columns]

## Sheet: Binned
	3	FISH	PI	5	FISH	PI	7	FISH	PI	8	FISH	PI	10	FISH	PI	11	FISH	PI	12	FISH	PI	14	FISH	PI	15	FISH	PI	`16	FISH	PI	17	FISH	PI	18	FISH	PI	19	FISH	PI	20	FISH	PI	21	FISH	PI	22	FISH	PI	23
	X	Y	Y	X	Y	Y	X	Y	Y	X	Y	Y	X	Y	Y	X	Y	Y	X	Y	Y	X	Y	Y	X	Y	Y	X	Y	Y	X	Y	Y	X	Y	Y	X	Y	Y	X	Y	Y	X	Y	Y	X	Y	Y	X
0	0	1	209	0	5	170	0	2	119	0	4	127	0	2	201	0	6	201	0	4	141	0	3	176	0	2	186	0	3	250	0	6	178	0	1	148	0	1	159	0	4	177	0	4	167	0	10	173	0
1	1.42857	1	215.027	1.28205	6.646	169.496	1.5873	2	138.827	0.900901	3.524	136.351	1.25	2.625	199.81	1.02041	3.919	205.975	1.38889	3.055	143.687	0.961538	3	178.156	1.66667	2.336	179.601	1.25	3	245.16	1.92308	6.998	186.92	1.47059	1	155.689	1.53846	1.967	163.743	1.08696	3.005	188.267	1.47059	4	175.976	1.51515	15.4794	164.746	1.21951
2	2.85714	1	215.169	2.5641	7.315	170.946	3.1746	2.587	149.131	1.8018	3.049	154.413	2.5	3.14	194.675	2.04082	3	205.698	2.77778	3	146.086	1.92308	3	178.321	3.33333	1.789	179.832	2.5	3.68	229.36	3.84615	7	195.097	2.94118	1	157.059	3.07692	2	162.964	2.17391	3	189.996	2.94118	4	190.776	3.0303	36.0724	158.201	2.43902
3	4.28571	1	194.742	3.84615	6.527	165.718	4.7619	3	155.703	2.7027	2.289	161.597	3.75	3.874	192.331	3.06122	3.024	200.956	4.16667	2.723	140.767	2.88462	2.645	171.183	5	1.184	183.42	3.75	4	215.84	5.76923	6.192	193.885	4.41176	1	161.137	4.61538	2.688	163.7	3.26087	3	189.024	4.41176	4	199.736	4.54545	67.1596	151.504	3.65854
4	5.71429	1	173.76	5.12821	5.073	151.423	6.34921	3.174	154.385	3.6036	2	163.881	5	4.499	193.802	4.08163	4.388	193.674	5.55556	2.297	138.926	3.84615	2	167.644	6.66667	1.08	192.826	5	4.12	205.8	7.69231	5.257	183.579	5.88235	1	171.421	6.15385	3.884	166.999	4.34783	3	175.969	5.88235	3.514	196.848	6.06061	86.3169	141.016	4.87805
5	7.14286	1	153.021	6.41026	4.068	144.835	7.93651	4.01	145.358	4.5045	1.86	159.727	6.25	5.123	193.429	5.10204	4.824	185.828	6.94444	2	140.631	4.80769	2	163.792	8.33333	0.291	195.603	6.25	4	200	9.61538	5.312	171.366	7.35294	1	178.013	7.69231	4.88	156.604	5.43478	3	179.322	7.35294	3.009	191.585	7.57576	64.3724	130.271	6.09756
6	8.57143	1	135.033	7.69231	3.082	139.387	9.52381	6.174	137.701	5.40541	1.249	146.394	7.5	5.748	189.898	6.12245	4.534	180.005	8.33333	2.191	138.767	5.76923	2	158.54	10	0	193.338	7.5	5.6	208.16	11.5385	5.374	156.297	8.82353	1.503	195.322	9.23077	6.225	160.607	6.52174	3	188.007	8.82353	3.511	199.467	9.09091	35.077	124.405	7.31707
7	10	1	120.914	8.97436	2.095	129.5	11.1111	7.814	129.938	6.30631	1.326	131.116	8.75	5.826	185.128	7.14286	3.253	181.153	9.72222	2.347	129.457	6.73077	2.675	155.923	11.6667	0	186.162	8.75	7.2	199.6	13.4615	3.464	141.396	10.2941	2.175	204.154	10.7692	11.062	164.408	7.6087	3	179.483	10.2941	5.838	200.163	10.6061	12.8651	117.33	8.53659
8	11.4286	1	111.329	10.2564	2	121.584	12.6984	8.867	119.964	7.20721	1.575	119.457	10	5.249	177.801	8.16327	3.352	179.479	11.1111	3.98	115.609	7.69231	3.914	151.4	13.3333	0	172.885	10	8.08	188.96	15.3846	2.515	116.888	11.7647	2.735	194.267	12.3077	15.128	160.446	8.69565	3	173.32	11.7647	9.978	195.486	12.1212	7.4937	109.226	9.7561
9	12.8571	1.358	104.302	11.5385	2.878	117.01	14.2857	8.517	112.086	8.10811	1.147	110.726	11.25	5.423	158.169	9.18367	3.986	171.202	12.5	7.309	104.213	8.65385	5.63	145.114	15	0	157.67	11.25	7.08	179.08	17.3077	2.561	102.807	13.2353	2.024	175.358	13.8462	13.807	152.841	9.78261	3	153.208	13.2353	16.159	182.909	13.6364	7.3181	104.288	10.9756
10	14.2857	1.921	101.047	12.8205	3	110.616	15.873	8.846	105.963	9.00901	1.037	100.031	12.5	6.37	138.837	10.2041	3.609	171.242	13.8889	12.096	93.8336	9.61538	5.755	137.401	16.6667	0	148.189	12.5	6	174	19.2308	3.604	95.886	14.7059	1.407	161.663	15.3846	9.011	138.31	10.8696	3.006	141.66	14.7059	20.362	170.595	15.1515	8.397	103.94	12.1951
11	15.7143	1.424	96.235	14.1026	3	106.18	17.4603	9.318	104.554	9.90991	1.941	81.568	13.75	5.539	131.215	11.2245	3.705	171.592	15.2778	13.906	84.8929	10.5769	4.848	126.892	18.3333	0	146.399	13.75	4.48	163.72	21.1538	5.95	84.556	16.1765	0.944	147.384	16.9231	6.474	127.303	11.9565	3	130.608	16.1765	17.894	159.347	16.6667	8.2144	105.18	13.4146
12	17.1429	1	89.07	15.3846	3	104.272	19.0476	12.459	102.161	10.8108	1.863	70.39	15	4.813	131.509	12.2449	3.894	174.609	16.6667	11.082	82.8717	11.5385	3.835	124.981	20	0	148.268	15	3.32	156.6	23.0769	9.175	84.988	17.6471	0.169	141.545	18.4615	12.481	120.926	13.0435	3	125.668	17.6471	12.163	145.183	18.1818	10.7767	108.568	14.6341
13	18.5714	1	86.748	16.6667	3	105.831	20.6349	15.358	99.1521	11.7117	1.109	61.979	16.25	4.867	129.375	13.2653	3.102	176.769	18.0556	6.752	77.8722	12.5	2.797	126.909	21.6667	0	149.643	16.25	3	158.36	25	11.929	98.402	19.1176	0.46	130.876	20	26.719	118.923	14.1304	3	118.616	19.1176	6.473	134.487	19.697	18.1504	111.375	15.8537
14	20	0.812	87.732	17.9487	3	108.297	22.2222	15.928	94.1326	12.6126	1.004	53.463	17.5	4.763	130.728	14.2857	2.377	177.193	19.4444	3.691	78.296	13.4615	2.012	131.014	23.3333	0	153.664	17.5	3.32	156.16	26.9231	12.726	105.069	20.5882	0.44	128.988	21.5385	37.861	118.942	15.2174	3	114.842	20.5882	3.663	128.678	21.2121	28.7752	108.228	17.0732
15	21.4286	0	93.329	19.2308	3.138	106.2	23.8095	13.494	91.8082	13.5135	1	55.19	18.75	4.922	131.186	15.3061	1.966	177.743	20.8333	1.69	79.6643	14.4231	2.067	127.867	25	0	152.551	18.75	4	143	28.8462	8.988	96.891	22.0588	0.466	131.524	23.0769	34.827	117.297	16.3043	3	119.142	22.0588	3.673	124.474	22.7273	30.4434	104.756	18.2927
16	22.8571	0	100.028	20.5128	3.355	96.6629	25.3968	8.967	100.23	14.4144	1.46	63.146	20	5.499	132.983	16.3265	1.297	177.659	22.2222	1.089	83.8238	15.3846	2.51	124.863	26.6667	0	141.378	20	2.92	134.12	30.7692	4.154	96.012	23.5294	0	130.692	24.6154	20.475	119.456	17.3913	3	124.608	23.5294	6.711	123.566	24.2424	24.7836	99.87	19.5122
17	24.2857	0	109.223	21.7949	3.463	93.6123	26.9841	4.987	99.91	15.3153	2	76.64	21.25	4.725	132.591	17.3469	1.535	180.589	23.6111	1.291	86.4706	16.3462	3	125.868	28.3333	0	133.016	21.25	2	119.88	32.6923	2.979	99.759	25	0	124.683	26.1538	6.848	126.429	18.4783	3	125.839	25	10.666	121.105	25.7576	20.4926	94.283	20.7317
18	25.7143	0	115.842	23.0769	3.037	94.042	28.5714	1.832	94.6228	16.2162	1.811	89.374	22.5	4.287	132.492	18.3673	1.379	180.43	25	1.432	85.5228	17.3077	3.262	129.658	30	0.045	125.24	22.5	1.68	104.52	34.6154	8.193	96.267	26.4706	0	118.048	27.6923	1.089	133.417	19.5652	3	131.295	26.4706	13.889	122.135	27.2727	16.4566	90.857	21.9512
19	27.1429	0	113.217	24.359	3	95.1384	30.1587	1.009	91.9634	17.1171	1	94.993	23.75	4.979	142.732	19.3878	2.036	183.813	26.3889	1.188	83.9013	18.2692	3.98	138.214	31.6667	1	121.248	23.75	1.12	92.36	36.5385	24.766	96.417	27.9412	0	115.586	29.2308	0	137.329	20.6522	3	128.417	27.9412	13.908	127.308	28.7879	16.2527	90.934	23.1707
20	28.5714	0	108.327	25.641	3	96.7748	31.746	2.041	87.1934	18.018	1.033	95.205	25	5.494	139.27	20.4082	2	182.822	27.7778	1.801	84.0691	19.2308	4.119	143.755	33.3333	1.186	122.606	25	1	84	38.4615	52.433	93.841	29.4118	0	114.902	30.7692	0	132.908	21.7391	2.439	128.708	29.4118	11.636	126.898	30.303	18.1379	91.004	24.3902
21	30	0	103.991	26.9231	3	95.3807	33.3333	4.995	87.9233	18.9189	1.01	86.242	26.25	6.351	130.262	21.4286	1.971	179.738	29.1667	2.423	81.3828	20.1923	4.006	149.061	35	3.346	116.631	26.25	1	74.08	40.3846	72.083	95.254	30.8824	0	111.405	32.3077	0	128.182	22.8261	2	132.611	30.8824	6.322	122.203	31.8182	20.2615	90.162	25.6098
22	31.4286	0	105.678	28.2051	3	93.1033	34.9206	12.289	92.1082	19.8198	1	79.042	27.5	6.078	124.078	22.449	1.382	170.734	30.5556	3.004	78.1006	21.1538	4	151.471	36.6667	7.07	109.205	27.5	1	66.68	42.3077	84.587	103.63	32.3529	0	110.953	33.8462	0	124.957	23.913	2.318	136.877	32.3529	3.08	118.173	33.3333	21.9222	88.267	26.8293
23	32.8571	0	107.891	29.4872	3	94.4251	36.5079	22.73	99.7285	20.7207	1	78.25	28.75	4.672	127.675	23.4694	1	160.28	31.9444	3	74.2926	22.1154	4.052	144.322	38.3333	12.417	100.479	28.75	1.4	58.36	44.2308	98.531	104.581	33.8235	0	104.785	35.3846	0	124.035	25	2.945	136.342	33.8235	0.708	116.511	34.8485	20.4558	85.405	28.0488
24	34.2857	0	112.017	30.7692	3	97.77	38.0952	25.674	103.112	21.6216	1	80.022	30	3.266	126.054	24.4898	1	161.297	33.3333	3	75.907	23.0769	4.837	134.945	40	18.722	92.511	30	2.52	51.08	46.1538	124.209	104.988	35.2941	0.11	99.659	36.9231	0	122.287	26.087	3.542	140.037	35.2941	0.087	113.293	36.3636	27.3615	82.383	29.2683
25	35.7143	0	113.764	32.0513	2.739	96.6016	39.6825	22.167	102.683	22.5225	1.295	84.052	31.25	2.183	126.438	25.5102	1	157.417	34.7222	3.163	75.2246	24.0385	5.306	127.925	41.6667	25.216	89.548	31.25	3	47	48.0769	172.336	108.624	36.7647	0	98.312	38.4615	0	119.958	27.1739	3.405	140.853	36.7647	0.587	114.385	37.8788	35.3459	85.546	30.4878
26	37.1429	0	110.259	33.3333	2.708	93.7324	41.2698	10.608	102.266	23.4234	1.881	84.7	32.5	1.97	132.878	26.5306	1	149.811	36.1111	2.772	78.2831	25	5.482	127.518	43.3333	34.051	91.106	32.5	3.92	45.08	50	227.045	104.259	38.2353	0	101.092	40	0	113.145	28.2609	2.952	136.722	38.2353	2.055	116.989	39.3939	34.4275	89.414	31.7073
27	38.5714	0	112.025	34.6154	2.039	92.075	42.8571	3.273	97.8869	24.3243	2	82.886	33.75	1.757	135.085	27.551	1.004	142.605	37.5	2.171	83.1713	25.9615	4.026	130.916	45	53.679	97.563	33.75	4.48	45.2	51.9231	238.28	101.806	39.7059	0	101.024	41.5385	0	99.7959	29.3478	1.831	138.124	39.7059	3.96	123.665	40.9091	25.867	90.679	32.9268
28	40	0	119.057	35.8974	1.37	96.3224	44.4444	0	91.4859	25.2252	1.982	85.591	35	1.585	133.069	28.5714	1.584	139.284	38.8889	2.152	86.3074	26.9231	3.015	126.531	46.6667	87.951	96.649	35	3.8	46.24	53.8462	206.374	104.091	41.1765	0.434	93.219	43.0769	0	99.5571	30.4348	1	142.552	41.1765	7.69	128.191	42.4242	21.0549	85.739	34.1463
29	41.4286	0	122.718	37.1795	0.701	101.456	46.0317	0	88.7256	26.1261	1.398	83.958	36.25	1.261	127.07	29.5918	1.599	135.759	40.2778	1.997	89.7722	27.8846	3	123.617	48.3333	129.613	91.253	36.25	2.4	48.84	55.7692	146.035	110.101	42.6471	2.032	92.883	44.6154	0	100.924	31.5217	1.005	139.959	42.6471	15.235	123.034	43.9394	21.7143	81.078	35.3659
30	42.8571	0	122.42	38.4615	0.032	106.221	47.619	0	89.6641	27.027	1	82.638	37.5	1	119.821	30.6122	1.978	127.39	41.6667	0.989	88.2575	28.8462	2.957	121.145	50	169.071	86.984	37.5	1	52	57.6923	75.596	111.341	44.1176	6.275	95.145	46.1538	1.631	101.593	32.6087	1.922	143.007	44.1176	26.97	123.964	45.4545	25.6644	81.016	36.5854
31	44.2857	0.431	118.725	39.7436	0	109.672	49.2063	0	94.8434	27.9279	1	79.861	38.75	1	118.112	31.6327	2.531	116.395	43.0556	0.409	90.9738	29.8077	3.122	118.442	51.6667	190.987	87.344	38.75	0.08	53.32	59.6154	28.253	114.584	45.5882	11.342	99.012	47.6923	7.564	108.932	33.6957	2.84	147.824	45.5882	47.281	122.609	46.9697	35.5431	80.237	37.8049
32	45.7143	0.998	114.196	41.0256	0	117.233	50.7937	0.186	102.066	28.8288	1	73.259	40	1.325	120.078	32.6531	2.325	118.426	44.4444	0.043	91.1227	30.7692	3.288	113.268	53.3333	180.167	90.199	40	0	54.32	61.5385	11.907	115.014	47.0588	14.804	110.17	49.2308	23.333	115.198	34.7826	3.392	153.42	47.0588	73.703	121.157	48.4848	59.0159	80.635	39.0244
33	47.1429	2.98	107.599	42.3077	0	117.366	52.381	3.003	107.981	29.7297	1	65.502	41.25	2.31	120.689	33.6735	2.967	121.26	45.8333	0	88.8853	31.7308	3.049	118.699	55	130.176	96.184	41.25	0	58.24	63.4615	6.541	115.791	48.5294	20.417	119.179	50.7692	57.334	117.778	35.8696	3.296	167.342	48.5294	101.877	128.22	50	81.1698	81.245	40.2439
34	48.5714	5.602	105.902	43.5897	0	119.893	53.9683	19.704	110.012	30.6306	1	62.206	42.5	3.165	123.837	34.6939	3	121.737	47.2222	0	91.8716	32.6923	2	129.819	56.6667	78.926	107.557	42.5	0.8	62.12	65.3846	3.925	113.043	50	37.304	120.765	52.3077	118.635	112.51	36.9565	2.406	176.961	50	125.568	133.821	51.5152	94.7302	78.352	41.4634
35	50	9.677	106.857	44.8718	0	116.121	55.5556	70.456	116.508	31.5315	0.974	63.243	43.75	3.386	129.261	35.7143	2.821	122.253	48.6111	0	98.8399	33.6538	1.676	124.209	58.3333	45.799	119.132	43.75	3	67	67.3077	1.219	104.617	51.4706	79.944	112.742	53.8462	186.262	107.836	38.0435	1.488	177.226	51.4706	132.161	140.658	53.0303	90.3382	80.32	42.6829
36	51.4286	17.251	106.048	46.1538	0	107.123	57.1429	153.129	120.964	32.4324	0.275	65.438	45	2.949	130.669	36.7347	2.181	120.842	50	0.344	104.392	34.6154	1.229	120.019	60	25.325	123.183	45	3.806	74.143	69.2308	0.17	103.044	52.9412	152.02	105.665	55.3846	227.861	110.19	39.1304	0.57	173.823	52.9412	120.971	140.168	54.5455	83.3384	80.566	43.9024
37	52.8571	28.539	111.098	47.4359	4.08	106.752	58.7302	210.126	121.058	33.3333	0	65.7	46.25	2.032	132.666	37.7551	1.541	114.189	51.3889	2.155	106.892	35.5769	1	119.554	61.6667	13.075	122.077	46.25	4.725	74.314	71.1538	0.041	98.204	54.4118	223.62	104.649	56.9231	228.448	113.852	40.2174	0	162.296	54.4118	99.234	136.075	56.0606	85.2294	74.053	45.122
38	54.2857	42.098	122.245	48.7179	18.998	111.749	60.3175	226.56	117.8	34.2342	0	72.95	47.5	1.666	128.59	38.7755	1	109.281	52.7778	8.156	103.403	36.5385	1.095	117.437	63.3333	6.257	123.81	47.5	6.937	68.719	73.0769	0	93.613	55.8824	247.289	105.102	58.4615	191.842	113.096	41.3043	0	146.991	55.8824	71.697	135.975	57.5758	88.0361	69.394	46.3415
39	55.7143	60.122	132.713	50	47.44	115.962	61.9048	208.32	113.52	35.1351	0	83.447	48.75	0.845	129.532	39.7959	1	101.746	54.1667	24.629	98.0227	37.5	1	119.69	65	2.904	128.862	48.75	10.433	66.484	75	0	93.55	57.3529	193.774	106.442	60	161.24	113.464	42.3913	0	134.061	57.3529	47.841	135.817	59.0909	91.161	63.759	47.561
40	57.1429	87.575	135.457	51.2821	79.549	124.795	63.4921	147.72	112.72	36.036	0	86.692	50	0.471	129.167	40.8163	1	96.825	55.5556	61.167	94.3011	38.4615	1	122.155	66.6667	1.453	132.171	50	16.092	65.415	76.9231	0	91.787	58.8235	122.19	113.076	61.5385	166.871	115.672	43.4783	0	122.742	58.8235	26.353	133.998	60.6061	85.4574	59.028	48.7805
41	58.5714	115.535	135.161	52.5641	93.393	132.749	65.0794	80.28	115.24	36.9369	0	82.982	51.25	0.519	127.739	41.8367	1	95	56.9444	122.896	94.0192	39.4231	1.405	120.665	68.3333	0.897	129.673	51.25	24.344	67.282	78.8462	0	85.894	60.2941	67.981	112.385	63.0769	171.406	117.788	44.5652	0	112.355	60.2941	11.159	127.326	62.1212	73.9143	57.106	50
42	60	130.193	131.522	53.8462	90.571	140.567	66.6667	33.52	116.48	37.8378	0	78.317	52.5	0	126.615	42.8571	0.609	93.413	58.3333	186.008	92.9274	40.3846	2	120.193	70	0.769	123.646	52.5	39.065	67.449	80.7692	0	84.662	61.7647	34.236	107.959	64.6154	140.106	115.914	45.6522	0	110.658	61.7647	2.68	122.194	63.6364	57.5299	60.036	51.2195
43	61.4286	110.245	120.766	55.1282	96.85	143.212	68.254	10.6	120.4	38.7387	0	76.052	53.75	0	126.414	43.8776	0	89.117	59.7222	217.482	91.4226	41.3462	2	121.29	71.6667	0.331	119.803	53.75	54.093	61.058	82.6923	0	85.376	63.2353	14.089	103.767	66.1538	96	112	46.7391	0	106.744	63.2353	0.132	116.221	65.1515	32.6851	63.006	52.439
44	62.8571	88.052	117.068	56.4103	127.262	143.613	69.8413	2.28	128.24	39.6396	0	78.92	55	0	123.499	44.898	0	83.395	61.1111	192.964	95.0617	42.3077	2	121.904	73.3333	0	117.396	55	65.411	56.105	84.6154	0	84.93	64.7059	4.591	95.178	67.6923	60.231	112.585	47.8261	0	107.599	64.7059	0	110.568	66.6667	12.6275	62.779	53.6585
45	64.2857	73.895	116.728	57.6923	171.993	148.985	71.4286	0.24	128.76	40.5405	0	79.657	56.25	0	123.078	45.9184	0	83.718	62.5	125.033	100.406	43.2692	2	125.128	75	0	112.119	56.25	78.783	54.059	86.5385	0.692	87.029	66.1765	0.77	95.395	69.2308	36.181	109.961	48.913	0	114.207	66.1765	0	107.81	68.1818	5.2181	66.79	54.878
46	65.7143	74.605	116.021	58.9744	196.486	155.951	73.0159	1.48	129.44	41.4414	0	80.287	57.5	0	120.822	46.9388	0	87.252	63.8889	75.984	105.59	44.2308	2.053	124.234	76.6667	0	107.771	57.5	122.052	55.594	88.4615	1.705	91.095	67.6471	0	96.811	70.7692	15.869	107.04	50	1.825	119.517	67.6471	0	109.076	69.697	3.7736	71.833	56.0976
47	67.1429	67.587	119.433	60.2564	184.199	155.149	74.6032	3.96	134.72	42.3423	0	83.454	58.75	0	127.346	47.9592	0	92.728	65.2778	35.118	108.641	45.1923	3.013	119.785	78.3333	0.303	104.618	58.75	165.98	57.707	90.3846	2	92.198	69.1176	0	105.671	72.3077	4.659	104.162	51.087	9.034	123.843	69.1176	0	110.84	71.2121	4.1692	75.323	57.3171
48	68.5714	50.426	122.464	61.5385	156.832	152.487	76.1905	7.72	136.76	43.2432	0	87.816	60	0	130.556	48.9796	0	101.417	66.6667	11.989	105.745	46.1538	3.743	118.482	80	0.519	100.465	60	172.538	66.916	92.3077	2	91.876	70.5882	0	108.347	73.8462	0.785	101.798	52.1739	24.96	131.884	70.5882	0	107.348	72.7273	4.6653	76.551	58.5366
49	70	23.899	121.05	62.8205	140.08	152.245	77.7778	10.294	135.47	44.1441	0	87.067	61.25	0	123.85	50	0	105.708	68.0556	2.613	106.066	47.1154	5.452	118.364	81.6667	0.478	98.379	61.25	130.72	78.083	94.2308	2	89.946	72.0588	0	118.491	75.3846	0.2	101.352	53.2609	50.875	143.621	72.0588	0	102.555	74.2424	4.7111	78.222	59.7561
50	71.4286	10.568	118.737	64.1026	131.465	144.664	79.3651	9.87	133.019	45.045	0	82.513	62.5	0	121.49	51.0204	1.315	104.436	69.4444	0.165	109.11	48.0769	9.485	120.133	83.3333	0.436	99.355	62.5	65.055	89.63	96.1538	1.858	82.209	73.5294	0	124.466	76.9231	0.003	93.8288	54.3478	87.886	156.813	73.5294	0	103.222	75.7576	3.686	77.501	60.9756
51	72.8571	6.07	116.422	65.3846	114.89	135.217	80.9524	7.073	132.886	45.9459	0	84.93	63.75	0	117.146	52.0408	3.399	107.672	70.8333	0.999	114.213	49.0385	15.451	125.227	85	0.182	101.087	63.75	55.955	100.339	98.0769	1.406	76.426	75	0	122.696	78.4615	0	97.5523	55.4348	129.44	160.524	75	0.715	102.966	77.2727	2.4109	76.159	62.1951
52	74.2857	3.535	116.795	66.6667	85.846	131.997	82.5397	4.764	131.829	46.8468	0	84.546	65	0	113.683	53.0612	6.063	112	72.2222	0.974	121.696	50	22.143	127.406	86.6667	0	104.25	65	55.44	105.069	100	1.164	73.006	76.4706	0	116.799	80	0	96.9912	56.5217	160.987	157.446	76.4706	1.308	106.594	78.7879	0.9051	78.63	63.4146
53	75.7143	0.937	116.585	67.9487	59.477	136.711	84.127	3.999	129.863	47.7477	0	82.979	66.25	0	114.534	54.0816	8.941	113.971	73.6111	0.854	125.942	50.9615	24.016	122.658	88.3333	0	108.925	66.25	50.564	112.744				77.9412	0.2	111.932	81.5385	0.908	91.7513	57.6087	171.486	155.852	77.9412	2.284	112.045	80.303	0.6335	79.325	64.6341
54	77.1429	0.012	111.764	69.2308	63.617	142.056	85.7143	3.779	128.465	48.6486	0.327	77.349	67.5	0	121.166	55.102	10.408	113.296	75	0	128.323	51.9231	19.324	112.528	90	0	113.359	67.5	46.333	122.12				79.4118	1	112.175	83.0769	1	94.5993	58.6957	139.728	155.288	79.4118	3.052	118.235	81.8182	0	81.698	65.8537
55	78.5714	0	106.402	70.5128	100.863	141.778	87.3016	2.319	122.083	49.5495	4.363	72.997	68.75	0.129	120.988	56.1224	10.081	114.558	76.3889	0	134.352	52.8846	9.819	104.405	91.6667	0	114.742	68.75	40.918	133.305				80.8824	1	107.118	84.6154	1	99.7868	59.7826	96.861	160.598	80.8824	3.396	123.965	83.3333	0	83.54	67.0732
56	80	1.809	100.707	71.7949	138.151	141.195	88.8889	2.076	118.228	50.4505	12.311	66.11	70	2.217	117.128	57.1429	7.841	115.666	77.7778	0	125.55	53.8462	2.573	99.3072	93.3333	0.434	111.675	70	30.092	136.4				82.3529	0.173	92.967	86.1538	1	106.838	60.8696	59.427	173.099	82.3529	3.496	128.543	84.8485	0	84.646	68.2927
57	81.4286	9.602	91.328	73.0769	150.009	152.339	90.4762	2	114.414	51.3514	23.979	65.001	71.25	6.019	119.073	58.1633	7.854	117.578	79.1667	0	118.881	54.8077	0.819	100.345	95	0.856	107.917	71.25	16.691	130.89				83.8235	0.319	88.117	87.6923	1	108.691	61.9565	33.493	183.061	83.8235	3.632	130.97	86.3636	0	93.716	69.5122
58	82.8571	17.615	85.135	74.359	112.918	144.244	92.0635	2.743	112.319	52.2523	43.201	68.947	72.5	17.258	120.486	59.1837	11.182	117.443	80.5556	0	109.288	55.7692	0.495	105.017	96.6667	0.897	106.794	72.5	7.965	131.006				85.2941	0.338	84.334	89.2308	0.973	110.538	63.0435	18.865	181.05	85.2941	3.687	124.008	87.8788	0	98.451	70.7317
59	84.2857	17.943	86.007	75.641	61.7	135.817	93.6508	3.292	108.854	53.1532	74.928	70.737	73.75	51.678	121.898	60.2041	18.805	127.182	81.9444	0.625	99.2034	56.7308	1.23	106.797	98.3333	0.939	104.193	73.75	3.667	131.705				86.7647	0.156	81.854	90.7692	0.123	106.454	64.1304	8.51	166.41	86.7647	3.824	119.947	89.3939	0	97.418	71.9512
60	85.7143	10.856	93.426	76.9231	19.259	126.28	95.2381	3.189	108.836	54.0541	119.576	73.136	75	112.539	128.218	61.2245	28.524	135.465	83.3333	1	94.0929	57.6923	4.81	103.326	100	0.98	100.28	75	2.022	130.029				88.2353	0	83.892	92.3077	0	100.517	65.2174	2.56	148.02	88.2353	3.757	114.466	90.9091	0	96	73.1707
61	87.1429	3.435	105.904	78.2051	3.912	120.024	96.8254	2.639	115.217	54.955	162.758	80.387	76.25	163.942	135.916	62.2449	34.287	133.242	84.7222	1	93.6091	58.6538	14.828	100.016				76.25	1.473	126.219				89.7059	0.051	85.789	93.8462	0	97.6508	66.3043	0.39	139.17	89.7059	4	111.613	92.4242	0	91.106	74.3902
62	88.5714	1	118.959	79.4872	1.349	117.911	98.4127	2.456	122.171	55.8559	190.184	76.53	77.5	189.68	140.028	63.2653	32.684	126.86	86.1111	1	94.4435	59.6154	33.148	99.2619				77.5	2.094	122.427				91.1765	0.755	86.77	95.3846	0	97.8899	67.3913	0	139.83	91.1765	4	113.396	93.9394	0	84.048	75.6098
63	90	1	125.474	80.7692	1	117.848	100	2.46	123.985	56.7568	196.443	72.882	78.75	198.653	139.287	64.2857	29.223	120.576	87.5	1	99.0482	60.5769	56.742	94.7749				78.75	3.389	118.761				92.6471	1	89.1	96.9231	0	99.2211	68.4783	0	144.05	92.6471	4	114.867	95.4545	0	79.555	76.8293
64	91.4286	1	126.157	82.0513	0.714	115.769				57.6577	173.549	73.699	80	226.796	146.957	65.3061	28.117	113.525	88.8889	1	106.33	61.5385	85.766	95.4852				80	5.571	116.131				94.1176	1	92.415	98.4615	0	98.8477	69.5652	0	149.05	94.1176	4.734	116.721	96.9697	0	77.846	78.0488
65	92.8571	1	125.31	83.3333	1.311	110.635				58.5586	109.73	80.69	81.25	239.14	147.396	66.3265	28.62	104.045	90.2778	1	105.57	62.5	111.522	105.622				81.25	5.053	111.32				95.5882	1.761	95.918	100	0	100.417	70.6522	0	157.1	95.5882	5	116.04	98.4848	0	78.218	79.2683
66	94.2857	0.948	120.347	84.6154	3.368	110.792				59.4595	59.806	83.158	82.5	195.365	142.886	67.3469	37.343	97.05	91.6667	1.81	103.38	63.4615	124.897	115.002				82.5	3.658	107.387				97.0588	2	96.554				71.7391	0	161.61	97.0588	5	113.764	100	0	77.035	80.4878
67	95.7143	0.768	121.952	85.8974	4.835	110.227				60.3604	29.762	83.345	83.75	126.891	135.981	68.3673	58.97	94.469	93.0556	2	100.57	64.4231	116.631	120.88				83.75	1.652	106.013				98.5294	2	96.267				72.8261	0	156.51	98.5294	5	111.376				81.7073
68	97.1429	1	123.84	87.1795	4.044	108.183				61.2613	16.834	86.238	85	96.845	130.216	69.3878	97.157	93.278	94.4444	2.81	98.38	65.3846	95.972	120.002				85	1	104.44				68	1.666	95.003				73.913	0	146.9	100	5	103.576				82.9268
69	98.5714	1	120.758	88.4615	2.871	97.1491				62.1622	10.693	93.705	86.25	73.497	130.95	70.4082	126.913	91.253	95.8333	3	98	66.3462	68.009	112.852				86.25	0.999	105.444										75	0	135.07							84.1463
70	100	1	110.624	89.7436	1.989	83.7905				63.0631	4.739	97.595	87.5	65.515	123.024	71.4286	128.676	91.264	97.2222	3	97.19	67.3077	50.731	101.791				87.5	0.486	104.298										76.087	0.61	127.56							85.3659
71				91.0256	1.4	82.8384				63.964	0.771	98.555	88.75	49.397	115.168	72.449	103.926	87.443	98.6111	3.81	92.95	68.2692	34.73	92.8812				88.75	0.87	100.73										77.1739	1	122.95							86.5854
72				92.3077	1.142	87.4059				64.8649	0.029	91.12	90	24.579	112.84	73.4694	66.723	84.248	100	3.19	90.38	69.2308	23.866	84.4818				90	1.407	99.75										78.2609	1	117.95							87.8049
73				93.5897	1.903	95.2583				65.7658	0	95.977	91.25	8.301	112.382	74.4898	39.711	85.846				70.1923	14.548	81.3737				91.25	2.311	98.323										79.3478	1	114.17							89.0244
74				94.8718	2	105.68				66.6667	0	99.64	92.5	2.15	107.925	75.5102	21.474	92.882				71.1538	6.148	81.7871				92.5	4.002	97.437										80.4348	1.61	113.61							90.2439
75				96.1538	2	115.894				67.5676	0	96.305	93.75	0.44	108.754	76.5306	7.817	98.826				72.1154	1.092	83.9539				93.75	5.511	94.974										81.5217	2	113.39							91.4634
76				97.4359	2	123.307				68.4685	0	97.204	95	0	115.367	77.551	1	100.357				73.0769	0	86.261				95	7.134	95.254										82.6087	2.61	117.27							92.6829
77				98.7179	2.802	127.227				69.3694	0	94.222	96.25	0	117.856	78.5714	0.022	100.201				74.0385	0	89.6912				96.25	6.726	96.004										83.6957	3	125.49							93.9024
78				100	3	126.412				70.2703	0	88.558	97.5	0	113.088	79.5918	0	100.351				75	0.267	92.1365				97.5	5.062	95.7										84.7826	3	129.858							95.122
79										71.1712	0	79.216	98.75	0	108.314	80.6122	0	99.216				75.9615	4.695	94.393				98.75	3.813	90.504										85.8696	3	133.967							96.3415
80										72.0721	0	75.322	100	0	99.736	81.6327	0	100.658				76.9231	16.016	97.6956				100	4.729	82.013										86.9565	3	136.467							97.561
81										72.973	0	73.265				82.6531	0	104.811				77.8846	30.109	96.4669																88.0435	3	126.477							98.7805
82										73.8739	0	70.161				83.6735	0	108.386				78.8462	35.508	90.3886																89.1304	3	121.35							100
83										74.7748	0	64.112				84.6939	0	110.446				79.8077	26.203	89.9865																90.2174	3	118.109
84										75.6757	0	63.725				85.7143	0	109.939				80.7692	14.533	95.3506																91.3043	3.327	117.972
85										76.5766	0	68.596				86.7347	0	107.725				81.7308	6.133	95.6797																92.3913	3.352	114.99
86										77.4775	0.039	72.464				87.7551	0	107.007				82.6923	1.979	94.4269																93.4783	3.182	117.31
87										78.3784	0.848	71.788				88.7755	0.065	110.881				83.6538	2.947	90.7981																94.5652	3.217	124.701
88										79.2793	1	69.093				89.7959	0.684	113.11				84.6154	4.238	87.6734																95.6522	3.187	128.529
89										80.1802	1	72.06				90.8163	0.993	112.133				85.5769	4.161	86.6158																96.7391	3	128.7
90										81.0811	1	76.251				91.8367	1	113.281				86.5385	3.677	84.5059																97.8261	3	122.225
91										81.982	1	76.906				92.8571	1.014	111.689				87.5	3.114	83.2738																98.913	3.196	114.877
92										82.8829	1	75.377				93.8776	1.351	110.037				88.4615	4.036	84.2667																100	3.217	101.639
93										83.7838	1	73.559				94.898	2	107.288				89.4231	4.435	85.3948
94										84.6847	1	67.998				95.9184	2.028	106.335				90.3846	4.834	78.9926
95										85.5856	1	66.03				96.9388	2.605	112.434				91.3462	4.52	80.4358
96										86.4865	1	67.395				97.9592	2.749	116.855				92.3077	3.451	87.6461
97										87.3874	1	68.903				98.9796	3.804	115.496				93.2692	3	94.852
98										88.2883	1	65.643				100	3.872	107.647				94.2308	3	101.98
99										89.1892	1	61.09										95.1923	3	110.809
100										90.0901	1	55.643										96.1538	3	119.311
101										90.991	1	57.521										97.1154	3	123.859
102										91.8919	1	62.177										98.0769	3	124.569
103										92.7928	1	63.308										99.0385	3	124.622
104										93.6937	1	61.26										100	3	126.853
105										94.5946	1	60.035
106										95.4955	1	59.974
107										96.3964	1	61.294
108										97.2973	1	57.698
109										98.1982	1	51.639
110										99.0991	1	51.282
111										100	1	51.627
112
113
114
115
116
117
118
119
120
121
122
123
124
125
126
127
128
129
	0			0			0			0			0			0			0			0			0			0			0			0			0			0			0			0			0
	5	1	208.484	5	6.372	169.04	5	2.39675	140.665	5	2.787	150.495	5	3.2276	196.324	5	4.0662	201.461	5	3.1945	142.885	5	2.6075	172.516	5	1.82725	182.213	5	3.56	229.232	5	6.666	186.672	5	1	155.471	5	1.91375	162.352	5	3.201	184.051	5	4	183.372	5	32.1778	161.863	5
	10	1	145.682	10	3.5795	141.286	10	4.45267	145.815	10	1.37917	114.882	10	5.289	188.012	10	3.9898	179.533	10	2.20875	136.945	10	3.9948	149.675	10	0.63875	191.297	10	5.8	200.504	10	5.587	182.943	10	1.16767	181.585	10	4.99633	161.404	10	3	174.668	10	3.34467	195.967	10	61.9221	131.897	10
	15	1.31975	109.398	15	2.7195	113.848	15	8.39933	120.663	15	1.2872	60.8336	15	5.4788	147.506	15	3.3374	174.281	15	7.795	104.552	15	3.1118	127.532	15	0	177.514	15	5.792	172.472	15	4.419	148.846	15	2.08525	183.861	15	13.3323	159.232	15	3.0015	129.138	15	13.0842	187.288	15	9.22563	110.281	15
	20	1.059	89.9462	20	3.0345	106.15	20	10.2077	104.226	20	1.309	86.916	20	4.9728	131.156	20	1.6426	180.047	20	8.85775	80.9832	20	3.3742	132.472	20	0	150.131	20	3.312	149.648	20	2.89333	105.194	20	0.524333	139.935	20	13.6713	126.366	20	3	123.145	20	12.1767	146.339	20	11.3846	107.266	20
	25	0.203	97.578	25	3.21375	94.8639	25	14.9267	95.031	25	1.4352	81.982	25	4.9968	136.014	25	1.4706	170.974	25	1.3755	83.8704	25	4.61383	139.207	25	0	151.031	25	1.744	106.976	25	9.018	89.3153	25	0.2265	128.972	25	29.9705	118.654	25	2.5404	132.591	25	6.17825	124.456	25	28.0007	104.285	25
	30	0	110.344	30	3	94.921	30	5.262	98.2541	30	1.23	78.4682	30	5.1722	129.468	30	1.2374	144.975	30	1.711	83.719	30	3.60033	124.695	30	0.01125	138.046	30	1.384	66.84	30	11.2143	100.121	30	0	118.305	30	2.64567	132.392	30	2.935	138.416	30	12.5248	124.362	30	17.734	92.0247	30
	35	0	107.394	35	2.6215	95.0447	35	5.0835	89.7971	35	0.4498	65.9074	35	2.1522	130.705	35	2.5602	121.042	35	3.04175	75.8812	35	2.2484	121.203	35	1.39425	121.431	35	3.544	46.92	35	5.10867	97.346	35	0	109.048	35	0	128.683	35	2.0318	145.352	35	3.37	118.962	35	20.1944	88.7095	35
	40	0	113.776	40	0.52575	103.418	40	23.5237	101.841	40	0	81.0683	40	1.2342	123.63	40	1.7086	113.662	40	2.365	82.5873	40	1.1	119.9	40	10.3887	104.707	40	1.456	50.944	40	38.5995	95.129	40	0.0275	100.022	40	0	119.856	40	1.94	173.838	40	1.67225	117.083	40	32.3783	85.781	40
	45	0.10775	120.73	45	0	117.653	45	4.627	97.213	45	0	83.6562	45	2.627	124.907	45	0.5218	91.55	45	0.8595	90.0315	45	2.0106	122.55	45	32.917	92.682	45	1.5212	63.1646	45	85.067	101.155	45	2.91367	93.749	45	0	103.356	45	0	135.689	45	16.6317	125.063	45	22.8787	85.832	45
	50	4.81425	108.638	50	17.6295	110.397	50	0	91.0777	50	0.781667	80.8857	50	1.5926	130.125	50	0	94.1646	50	0.086	95.9972	50	9.88117	121.566	50	110.078	93.1122	50	8.3986	69.815	50	174.53	105.957	50	20.9668	112.281	50	10.8427	108.574	50	0.365	111.745	50	87.1072	126.452	50	50.3483	80.7832	50
	55	24.3912	111.562	55	77.7382	128.518	55	7.631	106.687	55	72.7922	70.7197	55	0.198	126.687	55	3.9436	108.757	55	8.821	103.177	55	13.1157	111.108	55	167.6	90.1778	55	39.801	63.4618	55	223.9	103.385	55	123.222	110.955	55	120.744	112.708	55	34.916	135.135	55	119.483	137.681	55	87.3941	80.1208	55
	60	98.3562	133.713	60	148.148	147.94	60	144.57	119.51	60	145.942	77.3918	60	0	125.06	60	9.4732	115.708	60	146.888	93.1676	60	10.9022	102.884	60	70.0565	111.514	60	120.953	58.0762	60	83.2947	112.009	60	187.751	108.207	60	202.348	112.65	60	139.7	157.942	60	48.6303	135.263	60	88.1422	69.0687	60
	65	100.596	121.521	65	153.144	151.136	65	194.2	114.68	65	10.4713	91.7597	65	0	121.345	65	28.7046	128.665	65	131.327	100.353	65	99.1116	106.353	65	11.8902	124.483	65	95.9416	88.0074	65	9.224	115.403	65	30.2242	104.822	65	159.906	115.71	65	30.0738	175.905	65	3.49275	119.077	65	72.3005	58.7233	65
	70	54.1292	119.742	70	80.9575	136.495	70	31.67	120.09	70	0	96.6696	70	0.4692	117.5	70	50.0414	100.473	70	12.4712	107.391	70	54.6616	102.402	70	1.50575	128.588	70	44.6694	121.928	70	1.77133	106.901	70	0.609	98.22	70	64.1373	111.515	70	0.59	144.024	70	0	109.242	70	13.5761	66.102	70
	75	11.018	118.251	75	125.485	144.889	75	1.89333	130.973	75	0	75.1057	75	37.9422	121.361	75	93.1898	88.0108	75	0.70675	122.544	75	3.67583	85.8672	75	0.275	118.241	75	12.0874	132.006	75	0.0136667	95.1223	75	0	118.5	75	7.10433	104.333	75	0	151.438	75	0.17875	104.023	75	4.5152	76.6987	75
	80	0.6895	108.864	80	21.555	125.008	80	9.29467	135.083	80	0.3774	69.1332	80	178.322	138.081	80	6.0626	98.5234	80	0	126.777	80	18.7997	93.5112	80	0.2055	106.243	80	2.9098	122.713	80	0	90.4103	80	0.3	115.901	80	0.05075	97.4311	80	0.722	123.54	80	1.83975	109.96	80	2.334	77.43	80
	85	11.7422	90.7943	85	1.59825	113.761	85	5.27867	131.526	85	1	73.6918	85	177.007	140.687	85	0	104.703	85	0.65625	99.0483	85	5.966	92.7857	85	0.40375	99.8215	85	3.3868	109.058	85	0	84.9893	85	0.497333	96.0673	85	0.727	95.7822	85	2.444	119.924	85	3.508	127.826	85	0.158375	82.3023	85
	90	4.07275	110.941	90	3.43475	99.8375	90	2.72467	122.925	90	1	65.8122	90	61.9666	122.44	90	0.1498	109.732	90	1	99.9405	90	3.8846	84.8114	90	0.0455	106.905	90	0.9524	102.932	90	1.1985	89.062	90	0.13625	83.9672	90	0.991	108.689	90	3	129.565	90	3.817	117.508	90	0	96.5283	90
	95	0.987	124.322	95	1.61125	92.7955	95	2.67833	111.862	95	1	59.9907	95	7.094	111.454	95	1.2716	110.886	95	1.905	101.975	95	3.761	88.7812	95	0.3225	111.923	95	4.073	97.1476	95	2	91.34	95	0.918333	89.4283	95	0.041	101.541	95	3.2156	118.616	95	4.24467	114.995	95	0	90.3847	95
	100	0.942	119.293	100	2.4505	123.21	100	2.686	117.552	100	1	55.5857	100	0	110.872	100	3.0116	111.753	100	3.25	94.63	100	3	121.67	100	0.918	104.796	100	5.4928	91.895	100	1.476	77.2137	100	1.92033	96.2463	100	0	99.0939	100	3.12	119.194	100	5	111.189	100	0	78.1635	100
[truncated: 58 more columns]

## Sheet: Summary
% Chromosome Length		Mean	STDDEV	SEM		Mean	STDDEV	SEM
0-5	FISH	3.74315	5.39616	0.939351	PI	175.607	23.939	4.16724
5-10		5.28018	10.6137	1.8476		163.744	24.4344	4.25348
10-15		4.86189	4.82305	0.839585		137.692	29.5575	5.1453
15-20		4.7076	5.89432	1.02607		120.515	22.5317	3.92227
20-25		5.31363	8.10546	1.41098		115.503	20.963	3.64919
25-30		3.54031	4.48343	0.780465		113.063	19.668	3.42376
30-35		4.12841	6.5589	1.14176		113.319	23.5492	4.09938
35-40		6.4611	10.0956	1.75741		114.848	23.5404	4.09785
40-45		10.6929	17.2921	3.01016		111.044	18.8945	3.2891
45-50		36.1626	47.6461	8.29412		108.039	17.2175	2.99718
50-55		73.8453	59.5235	10.3617		108.56	18.4844	3.21771
55-60		100.108	59.9976	10.4442		112.279	22.918	3.9895
60-65		66.9431	62.2517	10.8366		115.296	21.3496	3.71649
65-70		25.9442	33.6618	5.85977		112.714	17.3103	3.01334
70-75		12.277	26.4639	4.60677		114.782	19.6661	3.42344
75-80		8.44782	30.482	5.30624		111.332	16.2453	2.82795
80-85		8.75675	30.2584	5.26731		108.47	18.2032	3.16876
85-90		5.08381	11.1498	1.94093		108.595	17.2803	3.00812
90-95		3.26789	4.47378	0.778785		108.643	17.7162	3.084
95-100		2.92389	3.89268	0.677629		109.785	18.037	3.13985
