# Supplementary material for: Large domains of heterochromatin direct the formation of short mitotic chromosome loops
Source: eLife. 2020 Sep 11;9:e57212. doi: 10.7554/eLife.57212 (PMC7515631; doi:10.7554/eLife.57212)
Supplement: Figure 5—source data 2. [file elife-57212-fig5-data2.xlsx]

## Sheet: All
1	FISH		PI	2	FISH		PI	3	FISH		PI	4	FISH		PI	5	FISH		PI	6	FISH		PI	7	FISH		PI	8	FISH		PI	9	FISH		PI	10	FISH		PI	11	FISH		PI	12	FISH		PI	13	FISH
X	Y	X	Y	X	Y	X	Y	X	Y	X	Y	X	Y	X	Y	X	Y	X	Y	X	Y	X	Y	X	Y	X	Y	X	Y	X	Y	X	Y	X	Y	X	Y	X	Y	X	Y	X	Y	X	Y	X	Y	X	Y
0	3	0	178	0	0	0	129	0	1	0	195	0	0	0	182	0	1	0	207	0	1	0	92	0	0	0	177	0	1	0	146	0	0	0	135	0	0	0	160	0	0	0	185	0	0	0	170	0	0
1	3.956	1	181.629	1	0	1	130.691	1	1.093	1	191.481	1	0	1	190.788	1	0.077	1	219.385	1	0.531	1	97.13	1	0	1	184.536	1	0.772	1	156.37	1	0	1	134.294	1	0	1	165.255	1	0	1	190.041	1	0	1	171.793	1	0
2	3.464	2	178.342	2	0	2	128.998	2	1.037	2	191.262	2	0	2	190.297	2	0	2	218.101	2	0	2	103.918	2	0	2	194.806	2	0.531	2	152.602	2	0	2	125.173	2	0	2	173.056	2	0	2	179.501	2	0	2	167.088	2	0
3	3.118	3	176.504	3	0	3	126.947	3	0.504	3	190.159	3	0	3	190.336	3	0	3	201.396	3	0	3	110.82	3	1.448	3	192.751	3	0.025	3	151.452	3	0	3	118.211	3	0	3	183.085	3	0	3	170.374	3	0	3	163.757	3	0
4	1.824	4	184.436	4	0	4	123.256	4	0	4	191.458	4	0	4	184.113	4	0	4	187.243	4	0	4	115.773	4	4.732	4	185.844	4	0	4	165.64	4	0	4	111.155	4	0.602	4	183.767	4	0	4	168.572	4	0	4	176.343	4	0
5	0.234	5	183.766	5	0	5	117.025	5	0	5	184.891	5	0	5	178.568	5	0	5	178.899	5	0	5	116.103	5	10.711	5	186.37	5	0	5	184.143	5	0	5	104.84	5	3.522	5	183.442	5	0	5	171.762	5	0.536	5	187	5	0
6	0	6	178.524	6	0	6	111.771	6	0	6	178.938	6	0	6	178.326	6	0	6	172.343	6	0	6	112.477	6	18.231	6	177.179	6	0	6	191.747	6	1.082	6	100.63	6	14.986	6	182.186	6	0.441	6	175.37	6	2.213	6	196.919	6	0
7	0	7	174.167	7	0	7	104.817	7	0	7	174.918	7	0	7	178.4	7	0	7	170.325	7	0	7	105.781	7	28.047	7	156.528	7	0	7	193.456	7	10.325	7	94.443	7	43.337	7	173.228	7	1.099	7	174.902	7	5.749	7	202.739	7	0
8	0	8	169.102	8	0.314	8	91.6748	8	0	8	173.233	8	0.574	8	177.974	8	0	8	171.462	8	0	8	95.8839	8	41.192	8	140.538	8	0	8	192.16	8	37.36	8	82.213	8	86.066	8	162.773	8	2.341	8	167.941	8	12.408	8	177.731	8	0
9	0	9	175.808	9	4.482	9	79.2716	9	0	9	170.583	9	5.389	9	174.569	9	0	9	166.787	9	0	9	86.9171	9	68.533	9	131.097	9	0	9	183.954	9	86.371	9	68.123	9	131.059	9	148.027	9	6.512	9	156.335	9	25.769	9	150.692	9	0
10	0	10	181.577	10	18.205	10	66.5303	10	0	10	161.141	10	17.274	10	163.709	10	0.036	10	151.846	10	0	10	79.3014	10	118.371	10	119.112	10	0.971	10	159.364	10	149.936	10	58.837	10	159.421	10	128.376	10	13.644	10	148.884	10	50.391	10	121.817	10	0.926
11	0	11	164.764	11	45.458	11	57.3556	11	0	11	151.354	11	39.757	11	150.391	11	0.118	11	133.722	11	0	11	74.6812	11	178.047	11	116.053	11	7.349	11	136.752	11	214.441	11	51.809	11	164.369	11	104.089	11	23.155	11	143.296	11	81.357	11	93.654	11	9.039
12	0	12	140.868	12	80.948	12	54.0401	12	0	12	146.233	12	73.344	12	135.615	12	0.722	12	117.876	12	0	12	64.7066	12	208.202	12	116.867	12	26.18	12	125.469	12	248.987	12	45.569	12	166.275	12	86.416	12	38.612	12	135.403	12	111.714	12	76.319	12	30.827
13	0.425	13	115.653	13	114.916	13	55.2263	13	0	13	151.698	13	115.072	13	121.079	13	4	13	98	13	1.526	13	55.6678	13	200.203	13	112.007	13	54.084	13	121.336	13	234.673	13	40.497	13	166.37	13	73.351	13	65.016	13	121.228	13	138.386	13	72.136	13	64.358
14	2.853	14	86.37	14	134.375	14	57.0639	14	0	14	155.582	14	162.846	14	103.956	14	13.402	14	84.107	14	10.372	14	46.5749	14	188.435	14	109.837	14	76.51	14	121.536	14	199.36	14	43.026	14	173.553	14	68.278	14	102.855	14	99.325	14	157.624	14	75.451	14	97.97
15	9.181	15	67.979	15	141.471	15	56.4745	15	0	15	150.359	15	192.825	15	92.174	15	32.426	15	73.343	15	38.068	15	40.9729	15	166.855	15	107.524	15	86.732	15	121.971	15	173.222	15	44.469	15	176.165	15	65.47	15	127.677	15	84.188	15	164.424	15	85.239	15	124.267
16	22.773	16	61.674	16	143.045	16	54.8793	16	0	16	133.181	16	200.367	16	88.43	16	56.828	16	72.42	16	78.243	16	37.5546	16	145.076	16	103.464	16	90.733	16	120.657	16	171.055	16	46.45	16	191.958	16	61.129	16	135.342	16	76.242	16	161.263	16	92.994	16	144.958
17	50.923	17	58.685	17	160.108	17	54.7785	17	0.757	17	113.278	17	199.957	17	90.181	17	76.722	17	75.112	17	113.814	17	34.2754	17	125.913	17	97.391	17	99.103	17	117.284	17	181.478	17	50.498	17	209.968	17	63.675	17	156.137	17	73.068	17	156.293	17	96.683	17	163.874
18	99.938	18	62.71	18	180.697	18	55.2299	18	5.686	18	97.958	18	207.552	18	87.137	18	86.965	18	76.018	18	149.916	18	33.5889	18	110.122	18	91.377	18	117.515	18	109.126	18	187.87	18	49.418	18	203.364	18	69.013	18	161.723	18	75.613	18	148.313	18	100.921	18	180.77
19	140.922	19	62.859	19	199.954	19	55.0246	19	19.325	19	88.643	19	229.748	19	85.009	19	98.107	19	78.349	19	175.89	19	36.3888	19	102.225	19	87.028	19	140.616	19	102.719	19	173.446	19	48.674	19	144.111	19	70.304	19	163.899	19	83.859	19	140.288	19	103.053	19	197.856
20	171.779	20	61.551	20	195.441	20	56.3697	20	46.376	20	81.991	20	249.817	20	80.976	20	111.278	20	80.615	20	180.889	20	39.0782	20	119.463	20	82.567	20	157.976	20	102.248	20	142.049	20	49.36	20	82.926	20	74.023	20	153.056	20	93.056	20	133.354	20	99.304	20	205.695
21	191.488	21	57.316	21	155.497	21	57.2549	21	86.507	21	81.912	21	225.634	21	81.445	21	127.657	21	80.26	21	164.297	21	39.5278	21	136.678	21	82.143	21	173.64	21	107.363	21	106.777	21	49.165	21	50.786	21	74.829	21	139.06	21	103.278	21	122.305	21	95.537	21	207.529
22	202.04	22	55.487	22	104.116	22	58.0368	22	131.026	22	82.161	22	168.997	22	84.763	22	151.84	22	77.148	22	146.511	22	39.153	22	143.481	22	83.65	22	192.058	22	108.827	22	75.423	22	47.834	22	29.283	22	75.536	22	130.866	22	103.706	22	104.958	22	92.595	22	208.442
23	204.354	23	57.212	23	65.867	23	58.1551	23	174.466	23	80.616	23	106.681	23	90.59	23	171.172	23	73.716	23	131.297	23	40.1505	23	138.556	23	83.164	23	207.572	23	108.19	23	48.842	23	47.45	23	19.042	23	75.989	23	127.279	23	97.912	23	79.118	23	87.165	23	210.276
24	196.878	24	65.945	24	47.225	24	57.868	24	205.609	24	79.879	24	58.325	24	100.237	24	192.396	24	68.917	24	110.679	24	39.7153	24	111.084	24	83.962	24	209.119	24	113.102	24	25.3	24	48.887	24	10.876	24	76.207	24	114.562	24	94.552	24	53.983	24	85.445	24	211.336
25	173.501	25	75.979	25	42.312	25	58.6507	25	212.45	25	80.462	25	24.729	25	104.351	25	212.166	25	68.663	25	97.504	25	40.5096	25	80.502	25	86.562	25	186.027	25	122.413	25	8.297	25	52.22	25	5.511	25	79.217	25	107.098	25	93.235	25	32.113	25	81.93	25	195.056
26	148.711	26	77.496	26	47.765	26	59.3006	26	193.892	26	83.384	26	7.439	26	103.141	26	208	26	74	26	87.347	26	44.2907	26	57.461	26	91.228	26	150.044	26	132.928	26	1.126	26	54.332	26	1.86	26	85.856	26	99.113	26	95.208	26	15.659	26	80.914	26	165.348
27	148.949	27	77.015	27	50.117	27	59.588	27	167.409	27	86.214	27	1.318	27	99.086	27	160.574	27	79.112	27	73.489	27	45.8165	27	42.759	27	91.378	27	115.115	27	139.997	27	0	27	54.906	27	0.085	27	87.816	27	88.725	27	100.046	27	5.139	27	80.936	27	140.151
28	165.647	28	73.777	28	38.596	28	61.091	28	154.69	28	85.711	28	0.006	28	94.826	28	96.083	28	84.527	28	52.41	28	48.9358	28	33.14	28	86.225	28	83.711	28	144.217	28	0	28	54.494	28	0	28	89.876	28	75.05	28	102.701	28	0.737	28	79.036	28	114.594
29	161.341	29	78.091	29	23.144	29	65.6189	29	152.985	29	81.408	29	0	29	95.022	29	44.485	29	91.746	29	30.021	29	57.1642	29	23.226	29	82.092	29	54.9	29	143.442	29	0	29	54.764	29	0	29	88.475	29	62.14	29	101.929	29	0	29	80.092	29	83.101
30	153.863	30	88.34	30	12.711	30	69.6493	30	156.06	30	72.653	30	0	30	96.749	30	15.195	30	100.071	30	14.26	30	60.2338	30	14.042	30	80.195	30	33.308	30	143.499	30	0	30	56.219	30	0	30	88.177	30	48.547	30	100.234	30	0	30	83.234	30	56.243
31	135.384	31	96.486	31	7.257	31	72.2191	31	159.34	31	66.633	31	0	31	101.588	31	3.692	31	101.882	31	4.724	31	61.7699	31	9.762	31	83.469	31	18.325	31	137.704	31	0	31	55.982	31	0	31	89.724	31	35.05	31	100.592	31	0	31	86.546	31	38.468
32	122.855	32	98.099	32	3.542	32	71.484	32	155.454	32	69.497	32	0	32	110.009	32	0.462	32	102.521	32	0.531	32	64.6236	32	8.289	32	86.896	32	8.856	32	129.62	32	0	32	55.728	32	0	32	93.49	32	23.984	32	109.05	32	0	32	90.645	32	24.625
33	114.842	33	92.564	33	0.587	33	68.884	33	143.66	33	75.01	33	0	33	114.112	33	0	33	105.882	33	0	33	65.2936	33	5.942	33	84.303	33	4.651	33	118.445	33	0	33	53.734	33	0	33	97.5	33	16.156	33	117.633	33	0	33	96.023	33	16.446
34	97.062	34	85.695	34	0	34	63.0611	34	123.839	34	84.345	34	0	34	109.808	34	0	34	107.799	34	0	34	63.6467	34	3.074	34	77.235	34	5.666	34	111.867	34	0	34	49.529	34	0	34	99.354	34	11.75	34	113.977	34	0	34	98.487	34	14.172
35	58.706	35	80.34	35	0	35	57.3587	35	102.031	35	94.002	35	0	35	109.588	35	0	35	106.888	35	0	35	61.0792	35	1.097	35	69.959	35	3.249	35	115.527	35	0	35	46.678	35	0	35	101.57	35	9.055	35	114.949	35	0	35	99.68	35	16.332
36	25.416	36	74.882	36	0	36	54.808	36	86.875	36	99.693	36	0	36	108.145	36	0	36	107.538	36	0	36	59.2148	36	0.179	36	63.306	36	0.779	36	114.636	36	0	36	44.593	36	0	36	97.778	36	8.976	36	117.805	36	0	36	101.204	36	21.363
37	6.471	37	71.283	37	0	37	54.196	37	71.659	37	110.608	37	0	37	100.962	37	0	37	110.799	37	0.048	37	57.9908	37	0.736	37	60.188	37	0.118	37	120.25	37	0	37	43.813	37	0	37	85.675	37	11.606	37	117.029	37	0	37	104.99	37	25.748
38	0.632	38	69.86	38	0	38	57.1285	38	51.112	38	124.908	38	0	38	98.659	38	0	38	119.035	38	0.7	38	58.3079	38	1.284	38	65.651	38	0	38	127.284	38	0	38	47.012	38	0	38	77.837	38	13.727	38	117.7	38	0	38	110.261	38	23.531
39	0	39	73.951	39	0	39	60.4309	39	30.62	39	125.485	39	0.783	39	100.349	39	0	39	121	39	1.524	39	57.8888	39	0.897	39	71.798	39	0	39	134.427	39	0	39	51.411	39	0	39	74.401	39	11.214	39	119.222	39	0	39	117.588	39	15.798
40	0	40	80.544	40	0	40	62.6639	40	16.857	40	118.801	40	1	40	99.886	40	0	40	112.925	40	1.144	40	56.6439	40	0.535	40	74.656	40	0	40	141.745	40	0.9	40	56.109	40	0	40	75.081	40	7.133	40	114.51	40	0	40	117.959	40	7.393
41	0	41	84.887	41	0	41	60.2366	41	8.321	41	112.928	41	1.452	41	107.631	41	0	41	106.75	41	0.757	41	55.057	41	0.869	41	80.074	41	0	41	138.164	41	1.849	41	55.252	41	0	41	79.909	41	5.456	41	108.889	41	0.159	41	115.678	41	2.097
42	0	42	86.927	42	0	42	60.124	42	3.727	42	102.987	42	1.99	42	119.122	42	0	42	101.225	42	0.514	42	54.0061	42	1.774	42	82.986	42	0	42	127.645	42	2.803	42	54.444	42	0.289	42	90.037	42	5.491	42	103.907	42	0.834	42	113.579	42	0
43	0	43	86.133	43	0	43	61.093	43	0.664	43	93.91	43	2	43	121.605	43	0	43	95.412	43	0.166	43	56.1199	43	2.39	43	79.731	43	0.479	43	115.619	43	3.411	43	54.827	43	1.026	43	95.716	43	6.272	43	105.185	43	1	43	110.456	43	0
44	0	44	80.669	44	0	44	60.7609	44	0	44	86.979	44	2.369	44	121.176	44	0.472	44	90.154	44	1.015	44	60.9621	44	3.553	44	78.544	44	1.429	44	104.497	44	4.432	44	54.926	44	1.83	44	94.67	44	7.185	44	109.203	44	1	44	104.935	44	0
45	0	45	75.14	45	0	45	59.9309	45	0	45	85.988	45	3	45	120.675	45	1	45	87.451	45	1.657	45	63.8564	45	4.412	45	79.344	45	1.924	45	101.404	45	4.546	45	55.995	45	2	45	87.902	45	7.879	45	111.258	45	1.055	45	99.971	45	0
46	0	46	75.482	46	0	46	60.7353	46	0	46	95.612	46	3	46	117.294	46	1.261	46	86.99	46	2.205	46	62.4914	46	4.179	46	83.762	46	2	46	103.286	46	4.582	46	56.452	46	2	46	81.944	46	7.315	46	118.737	46	1	46	98.731	46	0
47	0	47	77.072	47	0	47	60.8249	47	0	47	100.983	47	3.344	47	112.977	47	2.155	47	83.866	47	3.423	47	60.7226	47	4	47	83.796	47	2.475	47	105.106	47	4.136	47	56.247	47	1.82	47	78.036	47	6.563	47	123.59	47	1.032	47	95.636	47	0
48	0	48	78.395	48	0	48	62.1188	48	0	48	105.953	48	3.948	48	113.357	48	3.05	48	79.903	48	4.649	48	59.6563	48	4	48	75.431	48	3	48	108.584	48	3.468	48	55.995	48	1.438	48	76.29	48	6.097	48	123.317	48	1.071	48	105.335	48	0
49	0.333	49	81.769	49	0	49	65.5489	49	0	49	106.022	49	3.774	49	110.156	49	3.944	49	79.003	49	5	49	59.0887	49	4.298	49	72.118	49	3.326	49	116.042	49	2.657	49	56.302	49	2	49	78.197	49	6.996	49	126.868	49	1.667	49	113.024	49	0.313
50	0.631	50	89.576	50	0.28	50	69.6732	50	0	50	101.125	50	3.6	50	104.304	50	4	50	82.422	50	5	50	57.5239	50	4.931	50	75.677	50	3.814	50	124.861	50	2.33	50	56.661	50	2	50	80.099	50	6.959	50	125.029	50	1.969	50	119.665	50	1.235
51	0.932	51	96.311	51	0.774	51	69.6783	51	0	51	96.367	51	3.32	51	98.869	51	4.831	51	86.763	51	5.124	51	57.4868	51	5	51	81.902	51	4	51	127.026	51	2	51	53.614	51	2.571	51	81.02	51	7.205	51	117.426	51	2.901	51	127.117	51	2.171
52	1	52	101.869	52	1.162	52	68.5125	52	0	52	90.775	52	3	52	94.983	52	4.372	52	92.787	52	5.695	52	62.4675	52	4.983	52	80.433	52	4	52	128.431	52	2	52	49.377	52	3	52	81.795	52	9.226	52	114.571	52	4.982	52	124.815	52	2.793
53	1	53	105.98	53	1.709	53	67.5499	53	0.012	53	83.664	53	3	53	92.473	53	3.478	53	101.254	53	6	53	66.1196	53	4.802	53	77.638	53	4	53	126.833	53	2.153	53	47.167	53	2.863	53	82.268	53	10.074	53	115.657	53	6.876	53	121.286	53	2.731
54	1.66	54	98.42	54	2.048	54	62.406	54	0.737	54	77.893	54	3	54	89.965	54	3	54	109.027	54	6	54	70.858	54	4.019	54	77.316	54	4.469	54	117.733	54	2.837	54	43.687	54	2.969	54	83.649	54	9.137	54	110.828	54	9.262	54	117.865	54	2.771
55	2.66	55	86.08	55	2.638	55	56.7861	55	1	55	74.572	55	3	55	84.644	55	3	55	106.343	55	6.906	55	73.348	55	4.89	55	78.608	55	5.263	55	111.189	55	3.054	55	40	55	3.219	55	84.938	55	8.627	55	110.264	55	10.089	55	119.876	55	2.879
56	4.32	56	79.36	56	2.901	56	53.9779	56	1.612	56	71.508	56	3	56	88.443	56	3	56	95.248	56	7.979	56	76.8406	56	5	56	80.103	56	6.07	56	108.953	56	2.883	56	36.16	56	3.65	56	83.019	56	10.074	56	110.574	56	7.823	56	121.161	56	2.377
57	5.66	57	82.62	57	2.933	57	53.9589	57	2	57	73.675	57	3	57	94.429	57	3	57	95.5	57	7.308	57	72.1081	57	4.528	57	86.883	57	6.644	57	102.79	57	2.566	57	33.11	57	4.135	57	81.03	57	12.167	57	110.387	57	5.11	57	117.472	57	2.146
58	7.32	58	91.6	58	3	58	53.6378	58	2	58	82.603	58	3.113	58	99.726	58	3.634	58	91.501	58	7.156	58	66.4032	58	4.011	58	94.9	58	6.686	58	95.061	58	2	58	30.991	58	4.207	58	78.296	58	13.929	58	110.517	58	3.387	58	112.135	58	2.292
59	8.66	59	99.62	59	2.369	59	52.5015	59	2.544	59	94.553	59	3.836	59	103.031	59	3.869	59	90.692	59	7.007	59	60.1012	59	4.618	59	94.179	59	6.389	59	92.963	59	2.051	59	30.493	59	4.466	59	75.326	59	14.264	59	107.138	59	2.457	59	108.028	59	2.3
60	9.66	60	107.94	60	2	60	53.5342	60	3	60	105.956	60	3	60	106.601	60	4.063	60	92.6	60	7.636	60	55.5494	60	5	60	92.49	60	5.179	60	93.051	60	3	60	31.085	60	4.433	60	72.528	60	11.855	60	109.243	60	2.319	60	105.676	60	3.088
61	9.34	61	109.68	61	1.709	61	56.1115	61	3	61	114.962	61	3	61	106.781	61	4.917	61	97.666	61	8	61	53.22	61	5.04	61	93.257	61	4.101	61	91.838	61	3	61	32.473	61	4.273	61	73.455	61	12.052	61	111.564	61	2.81	61	102.139	61	3.528
62	7.02	62	107.68	62	1.855	62	55.7627	62	3	62	119.786	62	3	62	103.807	62	5	62	104.18	62	7.961	62	54.9362	62	5	62	94.764	62	4	62	96.108	62	3	62	36.389	62	4.801	62	76.242	62	12.803	62	112.37	62	3	62	97.294	62	4.169
63	4.68	63	103.04	63	2.181	63	56.3492	63	3	63	115.641	63	3	63	101.38	63	5	63	112.975	63	7.187	63	60.7373	63	4.723	63	99.875	63	4	63	104.485	63	3	63	39.628	63	3.589	63	81.274	63	15.625	63	113.161	63	3.53	63	91.866	63	3.846
64	3.353	64	94.574	64	2.693	64	57.9893	64	3	64	108.575	64	3	64	106.668	64	4.921	64	118.364	64	8.119	64	61.669	64	4.396	64	110.024	64	3.569	64	108.59	64	2.765	64	43.159	64	2.981	64	88.109	64	17.743	64	113.046	64	3.617	64	87.439	64	3.076
65	3	65	89.555	65	3	65	57.5673	65	3.176	65	106.287					65	4.522	65	118.876	65	9.345	65	63.1172	65	5.1	65	123.814	65	3.472	65	107.844	65	2.212	65	46.353	65	2.018	65	93.81	65	17.545	65	119.216	65	3.464	65	83.73	65	3
66	3.608	66	89.421	66	3.021	66	56.3609	66	3.52	66	105.521					66	3.999	66	117.64	66	10.162	66	63.0505	66	5.111	66	141.437	66	4	66	108.085	66	2.742	66	47.952	66	2	66	100.071	66	16.093	66	125.136	66	3.383	66	80.19	66	2.977
67	5.601	67	95.813	67	3.99	67	54.5151	67	4.003	67	107.307					67	3.552	67	119.798	67	10.304	67	60.9311	67	5	67	145.632	67	4	67	110.19	67	3	67	48.499	67	2	67	103.221	67	13.895	67	125.071	67	3	67	78.617	67	2.857
68	7.581	68	101.746	68	4.637	68	52.9204	68	4	68	113.729					68	3.123	68	118.255	68	9.71	68	60.1672	68	5.004	68	147.503	68	4	68	115.903	68	3	68	49.38	68	2	68	102.463	68	12.729	68	123.112	68	2.908	68	81.362	68	2.853
69	8.77	69	101.949	69	4.008	69	54.5707	69	4	69	117.117					69	3.904	69	115.108	69	9.017	69	59.9039	69	5.916	69	131.96	69	4.368	69	117.636	69	3	69	50.695	69	2	69	102.841	69	12	69	122.222	69	3	69	86.715	69	3
70	8.757	70	96.592	70	3.147	70	57.4652	70	4	70	114.959					70	4	70	111.055	70	8.304	70	57.7725					70	5.341	70	110.398	70	3	70	50.097	70	2	70	103.313	70	11.847	70	116.638	70	2.792	70	93.459	70	3.278
71	6.721	71	87.39	71	2.458	71	60.617	71	4	71	108.381					71	3.913	71	102.985	71	7.92	71	55.8243					71	6.079	71	106.453	71	3	71	47.754	71	2	71	101.026	71	9.918	71	115.403	71	2.425	71	98.786	71	4.445
72	4.318	72	81.666	72	2	72	64.1107	72	3.976	72	101.575					72	3.1	72	86.089	72	8.062	72	56.2889					72	6.63	72	104.98	72	3	72	47.095	72	2.58	72	100.31	72	8.032	72	114.846	72	3	72	104.805	72	5.82
73	3.056	73	80.223	73	2	73	65.9894	73	3.595	73	98.779									73	8.755	73	62.1516					73	6.738	73	100.695	73	3	73	47.364	73	3.099	73	101.914					73	3	73	107.242	73	6.483
74	3.091	74	79.424	74	2.045	74	67.2706	74	3.279	74	94.303									74	9.448	74	68.5037					74	5.765	74	98.222	74	3	74	49.18	74	4.332	74	103.82					74	3.057	74	111.029	74	6.036
75	3.596	75	75.908	75	2.777	75	66.6411	75	3.108	75	90.313									75	10	75	68.5708					75	4.66	75	98.32	75	3	75	53.638	75	5.223	75	102.67					75	3.952	75	111.476	75	4.559
76	4.414	76	69.735	76	3.033	76	65.5716	76	3.647	76	86.055									76	9.548	76	64.4216					76	4	76	100.045	76	2.583	76	58.653	76	5.256	76	96.435					76	4.781	76	109.515	76	3.217
77	5	77	65.509	77	3.612	77	64.9303	77	3.33	77	82.676									77	8.891	77	63.8929					77	4	77	103.196	77	2.037	77	60.295									77	4.63	77	104.913	77	3
78	5.047	78	64.876	78	3.555	78	65.2564	78	3.014	78	83.93									78	8.574	78	65.1108					78	4	78	106.055	78	2.74	78	63.607									78	4.183	78	105.557	78	3
79	4.715	79	70.413	79	4.039	79	65.7646	79	3	79	77.212									79	9.325	79	68.6609					79	4.008	79	108.592	79	3	79	63.575									79	3.86	79	109.475	79	3
80	4.267	80	83.245	80	5.022	80	67.5004	80	3	80	71.127									80	9.171	80	72.2564					80	4.288	80	110.249													80	3.166	80	108.478	80	2.988
81	4.78	81	94.636	81	5.695	81	68.3536	81	3.751	81	65.506									81	8.314	81	76.4816					81	4.023	81	108.396													81	2.624	81	102.366
82	6.153	82	101.083	82	5.741	82	67.1608	82	4	82	57.23									82	8.285	82	79.9753					82	4.247	82	107.809													82	2.477	82	94.327
83	8.466	83	108.145	83	4.821	83	64.8629	83	4	83	54.75									83	7.269	83	76.7823
84	11.842	84	113.921	84	3.878	84	59.8513	84	3.426	84	55.802									84	6.321	84	74.4076
85	14.18	85	111.968					85	3	85	59.511									85	6.125	85	71.7423
86	13.819	86	112.792					86	3	86	67.19									86	6.596	86	63.5577
87	11.024	87	107.248					87	3	87	73.235									87	7.317	87	64.6654
88	8.294	88	101.089					88	3	88	76.087									88	7.886	88	69.214
89	6.952	89	97.247					89	3	89	80.149									89	7.914	89	74.7589
90	7	90	94.088					90	3	90	86.099									90	8.163	90	78.2909
91	7.214	91	93.101					91	3	91	93.534									91	8.123	91	75.5792
92	7.075	92	86.998					92	3	92	102.064									92	8.067	92	62.5467
								93	3	93	105.385
								94	3	94	102.527
								95	3	95	100.858
								96	3.867	96	104.049
								97	4	97	106.379
								98	4.603	98	112.172
								99	5	99	115.389
								100	5	100	114.161
								101	4.792	101	101.182
[truncated: 66 more columns]

## Sheet: Binned
	1	FISH	PI	2	FISH	PI	3	FISH	PI	4	FISH	PI	5	FISH	PI	6	FISH	PI	7	FISH	PI	8	FISH	PI	9	FISH	PI	10	FISH	PI	11	FISH	PI	12	FISH	PI	13	FISH	PI	14	FISH	PI	15	FISH	PI	16	FISH	PI	17
X	X	Y	Y	X	Y	Y	X	Y	Y	X	Y	Y	X	Y	Y	X	Y	Y	X	Y	Y	X	Y	Y	X	Y	Y	X	Y	Y	X	Y	Y	X	Y	Y	X	Y	Y	X	Y	Y	X	Y	Y	X	Y	Y	X
0	0	3	178	0	0	129	0	1	195	0	0	182	0	1	207	0	1	92	0	0	177	0	1	146	0	0	135	0	0	160	0	0	185	0	0	170	0	0	217	0	0	132	0	0	193	0	0	223	0
1	1.08696	3.956	181.629	1.19048	0	130.691	0.990099	1.093	191.481	1.5625	0	190.788	1.38889	0.077	219.385	1.08696	0.531	97.13	1.44928	0	184.536	1.21951	0.772	156.37	1.26582	0	134.294	1.31579	0	165.255	1.38889	0	190.041	1.21951	0	171.793	1.25	0	218.057	1.33333	0	135.914	1.40845	0	200.857	1.25	0	224.716	1.5625
2	2.17391	3.464	178.342	2.38095	0	128.998	1.9802	1.037	191.262	3.125	0	190.297	2.77778	0	218.101	2.17391	0	103.918	2.89855	0	194.806	2.43902	0.531	152.602	2.53165	0	125.173	2.63158	0	173.056	2.77778	0	179.501	2.43902	0	167.088	2.5	0	213.207	2.66667	0	137.302	2.8169	0	205.884	2.5	0	222.801	3.125
3	3.26087	3.118	176.504	3.57143	0	126.947	2.9703	0.504	190.159	4.6875	0	190.336	4.16667	0	201.396	3.26087	0	110.82	4.34783	1.448	192.751	3.65854	0.025	151.452	3.79747	0	118.211	3.94737	0	183.085	4.16667	0	170.374	3.65854	0	163.757	3.75	0	204.959	4	0	136.905	4.22535	0	202.699	3.75	0	214.317	4.6875
4	4.34783	1.824	184.436	4.7619	0	123.256	3.9604	0	191.458	6.25	0	184.113	5.55556	0	187.243	4.34783	0	115.773	5.7971	4.732	185.844	4.87805	0	165.64	5.06329	0	111.155	5.26316	0.602	183.767	5.55556	0	168.572	4.87805	0	176.343	5	0	194.388	5.33333	0	128.206	5.6338	0	195.562	5	0	206.527	6.25
5	5.43478	0.234	183.766	5.95238	0	117.025	4.9505	0	184.891	7.8125	0	178.568	6.94444	0	178.899	5.43478	0	116.103	7.24638	10.711	186.37	6.09756	0	184.143	6.32911	0	104.84	6.57895	3.522	183.442	6.94444	0	171.762	6.09756	0.536	187	6.25	0	183.739	6.66667	0	118.259	7.04225	0	184.876	6.25	0	195.975	7.8125
6	6.52174	0	178.524	7.14286	0	111.771	5.94059	0	178.938	9.375	0	178.326	8.33333	0	172.343	6.52174	0	112.477	8.69565	18.231	177.179	7.31707	0	191.747	7.59494	1.082	100.63	7.89474	14.986	182.186	8.33333	0.441	175.37	7.31707	2.213	196.919	7.5	0	171.036	8	0	111.765	8.4507	0	169.798	7.5	0.013	187.575	9.375
7	7.6087	0	174.167	8.33333	0	104.817	6.93069	0	174.918	10.9375	0	178.4	9.72222	0	170.325	7.6087	0	105.781	10.1449	28.047	156.528	8.53659	0	193.456	8.86076	10.325	94.443	9.21053	43.337	173.228	9.72222	1.099	174.902	8.53659	5.749	202.739	8.75	0	170.102	9.33333	0	116.226	9.85915	0	157.041	8.75	0.601	178.413	10.9375
8	8.69565	0	169.102	9.52381	0.314	91.6748	7.92079	0	173.233	12.5	0.574	177.974	11.1111	0	171.462	8.69565	0	95.8839	11.5942	41.192	140.538	9.7561	0	192.16	10.1266	37.36	82.213	10.5263	86.066	162.773	11.1111	2.341	167.941	9.7561	12.408	177.731	10	0	181.247	10.6667	0	117.657	11.2676	0	157.077	10	1.547	185.458	12.5
9	9.78261	0	175.808	10.7143	4.482	79.2716	8.91089	0	170.583	14.0625	5.389	174.569	12.5	0	166.787	9.78261	0	86.9171	13.0435	68.533	131.097	10.9756	0	183.954	11.3924	86.371	68.123	11.8421	131.059	148.027	12.5	6.512	156.335	10.9756	25.769	150.692	11.25	0	194.095	12	0	115.189	12.6761	0	154.596	11.25	2.795	194.148	14.0625
10	10.8696	0	181.577	11.9048	18.205	66.5303	9.90099	0	161.141	15.625	17.274	163.709	13.8889	0.036	151.846	10.8696	0	79.3014	14.4928	118.371	119.112	12.1951	0.971	159.364	12.6582	149.936	58.837	13.1579	159.421	128.376	13.8889	13.644	148.884	12.1951	50.391	121.817	12.5	0.926	190.321	13.3333	0.508	115.589	14.0845	2.581	150.219	12.5	2.14	190.011	15.625
11	11.9565	0	164.764	13.0952	45.458	57.3556	10.8911	0	151.354	17.1875	39.757	150.391	15.2778	0.118	133.722	11.9565	0	74.6812	15.942	178.047	116.053	13.4146	7.349	136.752	13.9241	214.441	51.809	14.4737	164.369	104.089	15.2778	23.155	143.296	13.4146	81.357	93.654	13.75	9.039	182.564	14.6667	6.658	113.148	15.493	10.35	145.199	13.75	2.466	173.778	17.1875
12	13.0435	0	140.868	14.2857	80.948	54.0401	11.8812	0	146.233	18.75	73.344	135.615	16.6667	0.722	117.876	13.0435	0	64.7066	17.3913	208.202	116.867	14.6341	26.18	125.469	15.1899	248.987	45.569	15.7895	166.275	86.416	16.6667	38.612	135.403	14.6341	111.714	76.319	15	30.827	167.471	16	20.411	104.736	16.9014	25.354	131.56	15	4.513	165.1	18.75
13	14.1304	0.425	115.653	15.4762	114.916	55.2263	12.8713	0	151.698	20.3125	115.072	121.079	18.0556	4	98	14.1304	1.526	55.6678	18.8406	200.203	112.007	15.8537	54.084	121.336	16.4557	234.673	40.497	17.1053	166.37	73.351	18.0556	65.016	121.228	15.8537	138.386	72.136	16.25	64.358	146.772	17.3333	39.369	93.1071	18.3099	44.322	115.629	16.25	12.225	160.722	20.3125
14	15.2174	2.853	86.37	16.6667	134.375	57.0639	13.8614	0	155.582	21.875	162.846	103.956	19.4444	13.402	84.107	15.2174	10.372	46.5749	20.2899	188.435	109.837	17.0732	76.51	121.536	17.7215	199.36	43.026	18.4211	173.553	68.278	19.4444	102.855	99.325	17.0732	157.624	75.451	17.5	97.97	126.211	18.6667	63.716	81.2289	19.7183	67.923	103.836	17.5	29.819	144.078	21.875
15	16.3043	9.181	67.979	17.8571	141.471	56.4745	14.8515	0	150.359	23.4375	192.825	92.174	20.8333	32.426	73.343	16.3043	38.068	40.9729	21.7391	166.855	107.524	18.2927	86.732	121.971	18.9873	173.222	44.469	19.7368	176.165	65.47	20.8333	127.677	84.188	18.2927	164.424	85.239	18.75	124.267	107.376	20	90.587	74.6499	21.1268	87.641	98.276	18.75	52.988	124.671	23.4375
16	17.3913	22.773	61.674	19.0476	143.045	54.8793	15.8416	0	133.181	25	200.367	88.43	22.2222	56.828	72.42	17.3913	78.243	37.5546	23.1884	145.076	103.464	19.5122	90.733	120.657	20.2532	171.055	46.45	21.0526	191.958	61.129	22.2222	135.342	76.242	19.5122	161.263	92.994	20	144.958	95.119	21.3333	121.13	68.5606	22.5352	103.232	95.203	20	73.223	109.835	25
17	18.4783	50.923	58.685	20.2381	160.108	54.7785	16.8317	0.757	113.278	26.5625	199.957	90.181	23.6111	76.722	75.112	18.4783	113.814	34.2754	24.6377	125.913	97.391	20.7317	99.103	117.284	21.519	181.478	50.498	22.3684	209.968	63.675	23.6111	156.137	73.068	20.7317	156.293	96.683	21.25	163.874	83.621	22.6667	147.749	65.6683	23.9437	123.399	92.86	21.25	90.786	99.822	26.5625
18	19.5652	99.938	62.71	21.4286	180.697	55.2299	17.8218	5.686	97.958	28.125	207.552	87.137	25	86.965	76.018	19.5652	149.916	33.5889	26.087	110.122	91.377	21.9512	117.515	109.126	22.7848	187.87	49.418	23.6842	203.364	69.013	25	161.723	75.613	21.9512	148.313	100.921	22.5	180.77	72.711	24	185.148	65.9508	25.3521	145.377	93.969	22.5	113.147	94.299	28.125
19	20.6522	140.922	62.859	22.619	199.954	55.0246	18.8119	19.325	88.643	29.6875	229.748	85.009	26.3889	98.107	78.349	20.6522	175.89	36.3888	27.5362	102.225	87.028	23.1707	140.616	102.719	24.0506	173.446	48.674	25	144.111	70.304	26.3889	163.899	83.859	23.1707	140.288	103.053	23.75	197.856	71.785	25.3333	208.255	64.0444	26.7606	159.189	89.837	23.75	144.499	95.904	29.6875
20	21.7391	171.779	61.551	23.8095	195.441	56.3697	19.802	46.376	81.991	31.25	249.817	80.976	27.7778	111.278	80.615	21.7391	180.889	39.0782	28.9855	119.463	82.567	24.3902	157.976	102.248	25.3165	142.049	49.36	26.3158	82.926	74.023	27.7778	153.056	93.056	24.3902	133.354	99.304	25	205.695	79.787	26.6667	207.93	56.8497	28.169	163.044	88.335	25	179.668	101.298	31.25
21	22.8261	191.488	57.316	25	155.497	57.2549	20.7921	86.507	81.912	32.8125	225.634	81.445	29.1667	127.657	80.26	22.8261	164.297	39.5278	30.4348	136.678	82.143	25.6098	173.64	107.363	26.5823	106.777	49.165	27.6316	50.786	74.829	29.1667	139.06	103.278	25.6098	122.305	95.537	26.25	207.529	91.879	28	201.621	56.0842	29.5775	166.601	85.555	26.25	202.61	99.228	32.8125
22	23.913	202.04	55.487	26.1905	104.116	58.0368	21.7822	131.026	82.161	34.375	168.997	84.763	30.5556	151.84	77.148	23.913	146.511	39.153	31.8841	143.481	83.65	26.8293	192.058	108.827	27.8481	75.423	47.834	28.9474	29.283	75.536	30.5556	130.866	103.706	26.8293	104.958	92.595	27.5	208.442	96.272	29.3333	182.233	59.2531	30.9859	166.422	86.091	27.5	210.882	92.646	34.375
23	25	204.354	57.212	27.381	65.867	58.1551	22.7723	174.466	80.616	35.9375	106.681	90.59	31.9444	171.172	73.716	25	131.297	40.1505	33.3333	138.556	83.164	28.0488	207.572	108.19	29.1139	48.842	47.45	30.2632	19.042	75.989	31.9444	127.279	97.912	28.0488	79.118	87.165	28.75	210.276	87.203	30.6667	167.514	64.6926	32.3944	162.02	90.331	28.75	211.177	88.888	35.9375
24	26.087	196.878	65.945	28.5714	47.225	57.868	23.7624	205.609	79.879	37.5	58.325	100.237	33.3333	192.396	68.917	26.087	110.679	39.7153	34.7826	111.084	83.962	29.2683	209.119	113.102	30.3797	25.3	48.887	31.5789	10.876	76.207	33.3333	114.562	94.552	29.2683	53.983	85.445	30	211.336	76.62	32	152.019	62.2412	33.8028	148.668	94.767	30	201.028	84.38	37.5
25	27.1739	173.501	75.979	29.7619	42.312	58.6507	24.7525	212.45	80.462	39.0625	24.729	104.351	34.7222	212.166	68.663	27.1739	97.504	40.5096	36.2319	80.502	86.562	30.4878	186.027	122.413	31.6456	8.297	52.22	32.8947	5.511	79.217	34.7222	107.098	93.235	30.4878	32.113	81.93	31.25	195.056	71.726	33.3333	129.297	58.213	35.2113	125.537	92.447	31.25	185.626	79.015	39.0625
26	28.2609	148.711	77.496	30.9524	47.765	59.3006	25.7426	193.892	83.384	40.625	7.439	103.141	36.1111	208	74	28.2609	87.347	44.2907	37.6812	57.461	91.228	31.7073	150.044	132.928	32.9114	1.126	54.332	34.2105	1.86	85.856	36.1111	99.113	95.208	31.7073	15.659	80.914	32.5	165.348	73.785	34.6667	100.424	55.8991	36.6197	99.22	89.649	32.5	166.985	80.932	40.625
27	29.3478	148.949	77.015	32.1429	50.117	59.588	26.7327	167.409	86.214	42.1875	1.318	99.086	37.5	160.574	79.112	29.3478	73.489	45.8165	39.1304	42.759	91.378	32.9268	115.115	139.997	34.1772	0	54.906	35.5263	0.085	87.816	37.5	88.725	100.046	32.9268	5.139	80.936	33.75	140.151	77.842	36	69.676	55.3266	38.0282	70.012	93.562	33.75	142.387	89.278	42.1875
28	30.4348	165.647	73.777	33.3333	38.596	61.091	27.7228	154.69	85.711	43.75	0.006	94.826	38.8889	96.083	84.527	30.4348	52.41	48.9358	40.5797	33.14	86.225	34.1463	83.711	144.217	35.443	0	54.494	36.8421	0	89.876	38.8889	75.05	102.701	34.1463	0.737	79.036	35	114.594	83.974	37.3333	42.194	60.465	39.4366	41.079	99.66	35	110.586	95.188	43.75
29	31.5217	161.341	78.091	34.5238	23.144	65.6189	28.7129	152.985	81.408	45.3125	0	95.022	40.2778	44.485	91.746	31.5217	30.021	57.1642	42.029	23.226	82.092	35.3659	54.9	143.442	36.7089	0	54.764	38.1579	0	88.475	40.2778	62.14	101.929	35.3659	0	80.092	36.25	83.101	87.881	38.6667	22.625	66.1143	40.8451	18.118	102.514	36.25	80.503	97.655	45.3125
30	32.6087	153.863	88.34	35.7143	12.711	69.6493	29.703	156.06	72.653	46.875	0	96.749	41.6667	15.195	100.071	32.6087	14.26	60.2338	43.4783	14.042	80.195	36.5854	33.308	143.499	37.9747	0	56.219	39.4737	0	88.177	41.6667	48.547	100.234	36.5854	0	83.234	37.5	56.243	87.346	40	10.856	69.3443	42.2535	6.486	102.23	37.5	60.773	97.152	46.875
31	33.6957	135.384	96.486	36.9048	7.257	72.2191	30.6931	159.34	66.633	48.4375	0	101.588	43.0556	3.692	101.882	33.6957	4.724	61.7699	44.9275	9.762	83.469	37.8049	18.325	137.704	39.2405	0	55.982	40.7895	0	89.724	43.0556	35.05	100.592	37.8049	0	86.546	38.75	38.468	87.612	41.3333	4.167	72.0167	43.662	1.494	97.668	38.75	47.068	93.586	48.4375
32	34.7826	122.855	98.099	38.0952	3.542	71.484	31.6832	155.454	69.497	50	0	110.009	44.4444	0.462	102.521	34.7826	0.531	64.6236	46.3768	8.289	86.896	39.0244	8.856	129.62	40.5063	0	55.728	42.1053	0	93.49	44.4444	23.984	109.05	39.0244	0	90.645	40	24.625	90.06	42.6667	0.693	68.7882	45.0704	0	91.115	40	28.194	94.34	50
33	35.8696	114.842	92.564	39.2857	0.587	68.884	32.6733	143.66	75.01	51.5625	0	114.112	45.8333	0	105.882	35.8696	0	65.2936	47.8261	5.942	84.303	40.2439	4.651	118.445	41.7722	0	53.734	43.4211	0	97.5	45.8333	16.156	117.633	40.2439	0	96.023	41.25	16.446	97.215	44	0	63.586	46.4789	0	89.005	41.25	10.213	96	51.5625
34	36.9565	97.062	85.695	40.4762	0	63.0611	33.6634	123.839	84.345	53.125	0	109.808	47.2222	0	107.799	36.9565	0	63.6467	49.2754	3.074	77.235	41.4634	5.666	111.867	43.038	0	49.529	44.7368	0	99.354	47.2222	11.75	113.977	41.4634	0	98.487	42.5	14.172	100.879	45.3333	0	62.6956	47.8873	0	89.397	42.5	2.257	92.657	53.125
35	38.0435	58.706	80.34	41.6667	0	57.3587	34.6535	102.031	94.002	54.6875	0	109.588	48.6111	0	106.888	38.0435	0	61.0792	50.7246	1.097	69.959	42.6829	3.249	115.527	44.3038	0	46.678	46.0526	0	101.57	48.6111	9.055	114.949	42.6829	0	99.68	43.75	16.332	104.9	46.6667	0	64.7016	49.2958	0	89.685	43.75	0	88.859	54.6875
36	39.1304	25.416	74.882	42.8571	0	54.808	35.6436	86.875	99.693	56.25	0	108.145	50	0	107.538	39.1304	0	59.2148	52.1739	0.179	63.306	43.9024	0.779	114.636	45.5696	0	44.593	47.3684	0	97.778	50	8.976	117.805	43.9024	0	101.204	45	21.363	105.609	48	0	69.3633	50.7042	0	88.655	45	0	88.011	56.25
37	40.2174	6.471	71.283	44.0476	0	54.196	36.6337	71.659	110.608	57.8125	0	100.962	51.3889	0	110.799	40.2174	0.048	57.9908	53.6232	0.736	60.188	45.122	0.118	120.25	46.8354	0	43.813	48.6842	0	85.675	51.3889	11.606	117.029	45.122	0	104.99	46.25	25.748	101.753	49.3333	0	76.1551	52.1127	0	90.702	46.25	0	87.189	57.8125
38	41.3043	0.632	69.86	45.2381	0	57.1285	37.6238	51.112	124.908	59.375	0	98.659	52.7778	0	119.035	41.3043	0.7	58.3079	55.0725	1.284	65.651	46.3415	0	127.284	48.1013	0	47.012	50	0	77.837	52.7778	13.727	117.7	46.3415	0	110.261	47.5	23.531	99.709	50.6667	0	72.1111	53.5211	0	95.851	47.5	0	96.218	59.375
39	42.3913	0	73.951	46.4286	0	60.4309	38.6139	30.62	125.485	60.9375	0.783	100.349	54.1667	0	121	42.3913	1.524	57.8888	56.5217	0.897	71.798	47.561	0	134.427	49.3671	0	51.411	51.3158	0	74.401	54.1667	11.214	119.222	47.561	0	117.588	48.75	15.798	103.005	52	0	66.6539	54.9296	0	98.138	48.75	0	107.783	60.9375
40	43.4783	0	80.544	47.619	0	62.6639	39.604	16.857	118.801	62.5	1	99.886	55.5556	0	112.925	43.4783	1.144	56.6439	57.971	0.535	74.656	48.7805	0	141.745	50.6329	0.9	56.109	52.6316	0	75.081	55.5556	7.133	114.51	48.7805	0	117.959	50	7.393	108.932	53.3333	0	60.7566	56.338	0	93.16	50	0	114.543	62.5
41	44.5652	0	84.887	48.8095	0	60.2366	40.5941	8.321	112.928	64.0625	1.452	107.631	56.9444	0	106.75	44.5652	0.757	55.057	59.4203	0.869	80.074	50	0	138.164	51.8987	1.849	55.252	53.9474	0	79.909	56.9444	5.456	108.889	50	0.159	115.678	51.25	2.097	113.141	54.6667	0	60.299	57.7465	0	95.419	51.25	0	114.22	64.0625
42	45.6522	0	86.927	50	0	60.124	41.5842	3.727	102.987	65.625	1.99	119.122	58.3333	0	101.225	45.6522	0.514	54.0061	60.8696	1.774	82.986	51.2195	0	127.645	53.1646	2.803	54.444	55.2632	0.289	90.037	58.3333	5.491	103.907	51.2195	0.834	113.579	52.5	0	117.002	56	0	61.5142	59.1549	0	96.538	52.5	0	113.12	65.625
43	46.7391	0	86.133	51.1905	0	61.093	42.5743	0.664	93.91	67.1875	2	121.605	59.7222	0	95.412	46.7391	0.166	56.1199	62.3188	2.39	79.731	52.439	0.479	115.619	54.4304	3.411	54.827	56.5789	1.026	95.716	59.7222	6.272	105.185	52.439	1	110.456	53.75	0	113.468	57.3333	0	66.8307	60.5634	0	93.873	53.75	0	109.999	67.1875
44	47.8261	0	80.669	52.381	0	60.7609	43.5644	0	86.979	68.75	2.369	121.176	61.1111	0.472	90.154	47.8261	1.015	60.9621	63.7681	3.553	78.544	53.6585	1.429	104.497	55.6962	4.432	54.926	57.8947	1.83	94.67	61.1111	7.185	109.203	53.6585	1	104.935	55	0	110.408	58.6667	0.812	70.3122	61.9718	0	92.748	55	0	110.179	68.75
45	48.913	0	75.14	53.5714	0	59.9309	44.5545	0	85.988	70.3125	3	120.675	62.5	1	87.451	48.913	1.657	63.8564	65.2174	4.412	79.344	54.878	1.924	101.404	56.962	4.546	55.995	59.2105	2	87.902	62.5	7.879	111.258	54.878	1.055	99.971	56.25	0	111.382	60	1	72.5249	63.3803	0	95.994	56.25	0	110.741	70.3125
46	50	0	75.482	54.7619	0	60.7353	45.5446	0	95.612	71.875	3	117.294	63.8889	1.261	86.99	50	2.205	62.4914	66.6667	4.179	83.762	56.0976	2	103.286	58.2278	4.582	56.452	60.5263	2	81.944	63.8889	7.315	118.737	56.0976	1	98.731	57.5	0	115.338	61.3333	1	74.8165	64.7887	0	98.117	57.5	0	105.907	71.875
47	51.087	0	77.072	55.9524	0	60.8249	46.5347	0	100.983	73.4375	3.344	112.977	65.2778	2.155	83.866	51.087	3.423	60.7226	68.1159	4	83.796	57.3171	2.475	105.106	59.4937	4.136	56.247	61.8421	1.82	78.036	65.2778	6.563	123.59	57.3171	1.032	95.636	58.75	0	116.921	62.6667	1	74.9451	66.1972	0	98.351	58.75	0	97.077	73.4375
48	52.1739	0	78.395	57.1429	0	62.1188	47.5248	0	105.953	75	3.948	113.357	66.6667	3.05	79.903	52.1739	4.649	59.6563	69.5652	4	75.431	58.5366	3	108.584	60.7595	3.468	55.995	63.1579	1.438	76.29	66.6667	6.097	123.317	58.5366	1.071	105.335	60	0	111.534	64	1.236	74.4744	67.6056	0	94.408	60	0.895	94.891	75
49	53.2609	0.333	81.769	58.3333	0	65.5489	48.5149	0	106.022	76.5625	3.774	110.156	68.0556	3.944	79.003	53.2609	5	59.0887	71.0145	4.298	72.118	59.7561	3.326	116.042	62.0253	2.657	56.302	64.4737	2	78.197	68.0556	6.996	126.868	59.7561	1.667	113.024	61.25	0.313	105.33	65.3333	1.08	72.8142	69.0141	0	86.445	61.25	1.144	91.657	76.5625
50	54.3478	0.631	89.576	59.5238	0.28	69.6732	49.505	0	101.125	78.125	3.6	104.304	69.4444	4	82.422	54.3478	5	57.5239	72.4638	4.931	75.677	60.9756	3.814	124.861	63.2911	2.33	56.661	65.7895	2	80.099	69.4444	6.959	125.029	60.9756	1.969	119.665	62.5	1.235	94.678	66.6667	1	67.8315	70.4225	0	80.868	62.5	0.944	93.286	78.125
51	55.4348	0.932	96.311	60.7143	0.774	69.6783	50.495	0	96.367	79.6875	3.32	98.869	70.8333	4.831	86.763	55.4348	5.124	57.4868	73.913	5	81.902	62.1951	4	127.026	64.557	2	53.614	67.1053	2.571	81.02	70.8333	7.205	117.426	62.1951	2.901	127.117	63.75	2.171	82.37	68	1	63.032	71.831	0.244	77.584	63.75	0.95	99.906	79.6875
52	56.5217	1	101.869	61.9048	1.162	68.5125	51.4851	0	90.775	81.25	3	94.983	72.2222	4.372	92.787	56.5217	5.695	62.4675	75.3623	4.983	80.433	63.4146	4	128.431	65.8228	2	49.377	68.4211	3	81.795	72.2222	9.226	114.571	63.4146	4.982	124.815	65	2.793	80.681	69.3333	1	62.2085	73.2394	0.968	78.003	65	1	106.969	81.25
53	57.6087	1	105.98	63.0952	1.709	67.5499	52.4752	0.012	83.664	82.8125	3	92.473	73.6111	3.478	101.254	57.6087	6	66.1196	76.8116	4.802	77.638	64.6341	4	126.833	67.0886	2.153	47.167	69.7368	2.863	82.268	73.6111	10.074	115.657	64.6341	6.876	121.286	66.25	2.731	84.306	70.6667	1	61.5802	74.6479	1	80.503	66.25	1.215	106.072	82.8125
54	58.6957	1.66	98.42	64.2857	2.048	62.406	53.4653	0.737	77.893	84.375	3	89.965	75	3	109.027	58.6957	6	70.858	78.2609	4.019	77.316	65.8537	4.469	117.733	68.3544	2.837	43.687	71.0526	2.969	83.649	75	9.137	110.828	65.8537	9.262	117.865	67.5	2.771	88.658	72	1.136	58.535	76.0563	0.877	81.259	67.5	1.76	103.515	84.375
55	59.7826	2.66	86.08	65.4762	2.638	56.7861	54.4554	1	74.572	85.9375	3	84.644	76.3889	3	106.343	59.7826	6.906	73.348	79.7101	4.89	78.608	67.0732	5.263	111.189	69.6203	3.054	40	72.3684	3.219	84.938	76.3889	8.627	110.264	67.0732	10.089	119.876	68.75	2.879	92.201	73.3333	1.625	56.2658	77.4648	0.748	79.343	68.75	1.957	104.726	85.9375
56	60.8696	4.32	79.36	66.6667	2.901	53.9779	55.4455	1.612	71.508	87.5	3	88.443	77.7778	3	95.248	60.8696	7.979	76.8406	81.1594	5	80.103	68.2927	6.07	108.953	70.8861	2.883	36.16	73.6842	3.65	83.019	77.7778	10.074	110.574	68.2927	7.823	121.161	70	2.377	93.611	74.6667	1.909	55.5621	78.8732	1	77.702	70	1.221	102.258	87.5
57	61.9565	5.66	82.62	67.8571	2.933	53.9589	56.4356	2	73.675	89.0625	3	94.429	79.1667	3	95.5	61.9565	7.308	72.1081	82.6087	4.528	86.883	69.5122	6.644	102.79	72.1519	2.566	33.11	75	4.135	81.03	79.1667	12.167	110.387	69.5122	5.11	117.472	71.25	2.146	94.854	76	2	55.1371	80.2817	1.101	81.79	71.25	1	96.916	89.0625
58	63.0435	7.32	91.6	69.0476	3	53.6378	57.4257	2	82.603	90.625	3.113	99.726	80.5556	3.634	91.501	63.0435	7.156	66.4032	84.058	4.011	94.9	70.7317	6.686	95.061	73.4177	2	30.991	76.3158	4.207	78.296	80.5556	13.929	110.517	70.7317	3.387	112.135	72.5	2.292	95.838	77.3333	2	56.1124	81.6901	1.527	86.837	72.5	1	92.518	90.625
59	64.1304	8.66	99.62	70.2381	2.369	52.5015	58.4158	2.544	94.553	92.1875	3.836	103.031	81.9444	3.869	90.692	64.1304	7.007	60.1012	85.5072	4.618	94.179	71.9512	6.389	92.963	74.6835	2.051	30.493	77.6316	4.466	75.326	81.9444	14.264	107.138	71.9512	2.457	108.028	73.75	2.3	98.524	78.6667	2	56.6133	83.0986	2	90.483	73.75	1	95.57	92.1875
60	65.2174	9.66	107.94	71.4286	2	53.5342	59.4059	3	105.956	93.75	3	106.601	83.3333	4.063	92.6	65.2174	7.636	55.5494	86.9565	5	92.49	73.1707	5.179	93.051	75.9494	3	31.085	78.9474	4.433	72.528	83.3333	11.855	109.243	73.1707	2.319	105.676	75	3.088	97.912	80	2	56.3341	84.507	2.033	97.017	75	1.733	99.727	93.75
61	66.3043	9.34	109.68	72.619	1.709	56.1115	60.396	3	114.962	95.3125	3	106.781	84.7222	4.917	97.666	66.3043	8	53.22	88.4058	5.04	93.257	74.3902	4.101	91.838	77.2152	3	32.473	80.2632	4.273	73.455	84.7222	12.052	111.564	74.3902	2.81	102.139	76.25	3.528	100.811	81.3333	2	59.3936	85.9155	2.692	101.769	76.25	2.378	103.658	95.3125
62	67.3913	7.02	107.68	73.8095	1.855	55.7627	61.3861	3	119.786	96.875	3	103.807	86.1111	5	104.18	67.3913	7.961	54.9362	89.8551	5	94.764	75.6098	4	96.108	78.481	3	36.389	81.5789	4.801	76.242	86.1111	12.803	112.37	75.6098	3	97.294	77.5	4.169	107.324	82.6667	2	65.5809	87.3239	2.432	101.408	77.5	3.322	107.016	96.875
63	68.4783	4.68	103.04	75	2.181	56.3492	62.3762	3	115.641	98.4375	3	101.38	87.5	5	112.975	68.4783	7.187	60.7373	91.3043	4.723	99.875	76.8293	4	104.485	79.7468	3	39.628	82.8947	3.589	81.274	87.5	15.625	113.161	76.8293	3.53	91.866	78.75	3.846	107.382	84	1.876	65.8143	88.7324	2.172	105.638	78.75	3.671	108.47	98.4375
64	69.5652	3.353	94.574	76.1905	2.693	57.9893	63.3663	3	108.575	100	3	106.668	88.8889	4.921	118.364	69.5652	8.119	61.669	92.7536	4.396	110.024	78.0488	3.569	108.59	81.0127	2.765	43.159	84.2105	2.981	88.109	88.8889	17.743	113.046	78.0488	3.617	87.439	80	3.076	105.019	85.3333	1.259	64.5667	90.1408	2.818	105.982	80	3.748	103.927	100
65	70.6522	3	89.555	77.381	3	57.5673	64.3564	3.176	106.287				90.2778	4.522	118.876	70.6522	9.345	63.1172	94.2029	5.1	123.814	79.2683	3.472	107.844	82.2785	2.212	46.353	85.5263	2.018	93.81	90.2778	17.545	119.216	79.2683	3.464	83.73	81.25	3	104.642	86.6667	1.424	68.1367	91.5493	2.09	96.64	81.25	3.106	96.517
66	71.7391	3.608	89.421	78.5714	3.021	56.3609	65.3465	3.52	105.521				91.6667	3.999	117.64	71.7391	10.162	63.0505	95.6522	5.111	141.437	80.4878	4	108.085	83.5443	2.742	47.952	86.8421	2	100.071	91.6667	16.093	125.136	80.4878	3.383	80.19	82.5	2.977	104.469	88	1.943	71.5104	92.9577	1.497	91.152	82.5	2.256	91.531
67	72.8261	5.601	95.813	79.7619	3.99	54.5151	66.3366	4.003	107.307				93.0556	3.552	119.798	72.8261	10.304	60.9311	97.1014	5	145.632	81.7073	4	110.19	84.8101	3	48.499	88.1579	2	103.221	93.0556	13.895	125.071	81.7073	3	78.617	83.75	2.857	106.243	89.3333	1.553	72.9151	94.3662	1.027	90.429	83.75	2	88.676
68	73.913	7.581	101.746	80.9524	4.637	52.9204	67.3267	4	113.729				94.4444	3.123	118.255	73.913	9.71	60.1672	98.5507	5.004	147.503	82.9268	4	115.903	86.0759	3	49.38	89.4737	2	102.463	94.4444	12.729	123.112	82.9268	2.908	81.362	85	2.853	107.385	90.6667	1.564	71.8366	95.7746	1	93.726	85	2.016	89.551
69	75	8.77	101.949	82.1429	4.008	54.5707	68.3168	4	117.117				95.8333	3.904	115.108	75	9.017	59.9039	100	5.916	131.96	84.1463	4.368	117.636	87.3418	3	50.695	90.7895	2	102.841	95.8333	12	122.222	84.1463	3	86.715	86.25	3	107.328	92	2	70.8975	97.1831	1	92.444	86.25	2	88.274
70	76.087	8.757	96.592	83.3333	3.147	57.4652	69.3069	4	114.959				97.2222	4	111.055	76.087	8.304	57.7725				85.3659	5.341	110.398	88.6076	3	50.097	92.1053	2	103.313	97.2222	11.847	116.638	85.3659	2.792	93.459	87.5	3.278	107.899	93.3333	2	72.0357	98.5915	1	86.071	87.5	2	91.26
71	77.1739	6.721	87.39	84.5238	2.458	60.617	70.297	4	108.381				98.6111	3.913	102.985	77.1739	7.92	55.8243				86.5854	6.079	106.453	89.8734	3	47.754	93.4211	2	101.026	98.6111	9.918	115.403	86.5854	2.425	98.786	88.75	4.445	109.461	94.6667	2	74.6532	100	1.656	77.865	88.75	2	97.523
72	78.2609	4.318	81.666	85.7143	2	64.1107	71.2871	3.976	101.575				100	3.1	86.089	78.2609	8.062	56.2889				87.8049	6.63	104.98	91.1392	3	47.095	94.7368	2.58	100.31	100	8.032	114.846	87.8049	3	104.805	90	5.82	108.815	96	2	75.7533				90	2	101.791
73	79.3478	3.056	80.223	86.9048	2	65.9894	72.2772	3.595	98.779							79.3478	8.755	62.1516				89.0244	6.738	100.695	92.4051	3	47.364	96.0526	3.099	101.914				89.0244	3	107.242	91.25	6.483	107.41	97.3333	2	76.5014				91.25	2.695	109.157
74	80.4348	3.091	79.424	88.0952	2.045	67.2706	73.2673	3.279	94.303							80.4348	9.448	68.5037				90.2439	5.765	98.222	93.6709	3	49.18	97.3684	4.332	103.82				90.2439	3.057	111.029	92.5	6.036	108.54	98.6667	2	70.5595				92.5	3.692	120.994
75	81.5217	3.596	75.908	89.2857	2.777	66.6411	74.2574	3.108	90.313							81.5217	10	68.5708				91.4634	4.66	98.32	94.9367	3	53.638	98.6842	5.223	102.67				91.4634	3.952	111.476	93.75	4.559	114.301	100	2	62.9454				93.75	5.378	134.926
76	82.6087	4.414	69.735	90.4762	3.033	65.5716	75.2475	3.647	86.055							82.6087	9.548	64.4216				92.6829	4	100.045	96.2025	2.583	58.653	100	5.256	96.435				92.6829	4.781	109.515	95	3.217	122.351							95	6.228	145.047
77	83.6957	5	65.509	91.6667	3.612	64.9303	76.2376	3.33	82.676							83.6957	8.891	63.8929				93.9024	4	103.196	97.4684	2.037	60.295							93.9024	4.63	104.913	96.25	3	129.421							96.25	5.398	148.033
78	84.7826	5.047	64.876	92.8571	3.555	65.2564	77.2277	3.014	83.93							84.7826	8.574	65.1108				95.122	4	106.055	98.7342	2.74	63.607							95.122	4.183	105.557	97.5	3	135.373							97.5	3.761	140.46
79	85.8696	4.715	70.413	94.0476	4.039	65.7646	78.2178	3	77.212							85.8696	9.325	68.6609				96.3415	4.008	108.592	100	3	63.575							96.3415	3.86	109.475	98.75	3	137.336							98.75	3.033	122.095
80	86.9565	4.267	83.245	95.2381	5.022	67.5004	79.2079	3	71.127							86.9565	9.171	72.2564				97.561	4.288	110.249										97.561	3.166	108.478	100	2.988	122.214							100	3	100.892
81	88.0435	4.78	94.636	96.4286	5.695	68.3536	80.198	3.751	65.506							88.0435	8.314	76.4816				98.7805	4.023	108.396										98.7805	2.624	102.366
82	89.1304	6.153	101.083	97.619	5.741	67.1608	81.1881	4	57.23							89.1304	8.285	79.9753				100	4.247	107.809										100	2.477	94.327
83	90.2174	8.466	108.145	98.8095	4.821	64.8629	82.1782	4	54.75							90.2174	7.269	76.7823
84	91.3043	11.842	113.921	100	3.878	59.8513	83.1683	3.426	55.802							91.3043	6.321	74.4076
85	92.3913	14.18	111.968				84.1584	3	59.511							92.3913	6.125	71.7423
86	93.4783	13.819	112.792				85.1485	3	67.19							93.4783	6.596	63.5577
87	94.5652	11.024	107.248				86.1386	3	73.235							94.5652	7.317	64.6654
88	95.6522	8.294	101.089				87.1287	3	76.087							95.6522	7.886	69.214
89	96.7391	6.952	97.247				88.1188	3	80.149							96.7391	7.914	74.7589
90	97.8261	7	94.088				89.1089	3	86.099							97.8261	8.163	78.2909
91	98.913	7.214	93.101				90.099	3	93.534							98.913	8.123	75.5792
92	100	7.075	86.998				91.0891	3	102.064							100	8.067	62.5467
93							92.0792	3	105.385
94							93.0693	3	102.527
95							94.0594	3	100.858
96							95.0495	3.867	104.049
97							96.0396	4	106.379
98							97.0297	4.603	112.172
99							98.0198	5	115.389
100							99.0099	5	114.161
101							100	4.792	101.182
102
103
	0			0			0			0			0			0			0			0			0			0			0			0			0			0			0			0			0
	5	3.0724	179.782	5	0	127.778	5	0.605667	190.708	5	0	188.355	5	0.26925	211.47	5	0.3062	103.928	5	0.362	187.273	5	0.4656	154.413	5	0	128.169	5	0	170.349	5	0	181.229	5	0	169.796	5	0	209.522	5	0	135.53	5	0	200.61	5	0	218.272	5
	10	0.0468	176.273	10	0.0785	106.322	10	0	171.763	10	0	180.336	10	0	177.202	10	0	103.432	10	11.2247	183.131	10	0	190.376	10	2.85175	102.767	10	15.6118	180.656	10	0.385	172.651	10	5.2265	191.097	10	0	180.102	10	0	118.614	10	0	176.819	10	0.4322	190.79	10
	15	0.10625	150.715	15	37.2732	64.2994	15	0	151.045	15	1.98767	176.981	15	0.012	163.365	15	0.3815	68.5892	15	64.0357	136.819	15	8.625	151.385	15	122.027	65.2455	15	135.229	135.816	15	7.499	157.72	15	67.3077	110.621	15	8.1584	183.14	15	1.7915	115.395	15	0.860333	153.964	15	2.6922	181.699	15
	20	37.1336	67.4836	20	133.452	55.911	20	14.4288	103.01	20	43.4583	149.905	20	4.5605	108.426	20	78.0826	38.5933	20	195.484	114.976	20	77.0147	121.375	20	214.06	43.3903	20	170.591	73.3787	20	57.4095	124.813	20	155.424	81.455	20	92.476	128.59	20	53.5208	88.4305	20	36.9873	124.056	20	34.5536	140.881	20
	25	182.117	58.885	25	178.339	55.7315	25	162.012	81.006	25	167.778	101.41	25	63.2353	74.2233	25	159.777	38.8597	25	156.57	104.554	25	128.803	107.844	25	178.462	48.76	25	187.35	66.0302	25	145.22	77.2777	25	144.562	99.9903	25	178.631	80.6046	25	136.154	68.7074	25	104.757	95.4463	25	120.265	100.232	25
	30	174.479	70.7294	30	83.0034	57.9931	30	165.007	81.874	30	209.406	87.6893	30	106.002	78.8105	30	100.063	42.0965	30	110.603	86.9907	30	195.597	109.37	30	93.2728	48.4523	30	76.7765	73.673	30	154.435	88.9515	30	90.091	90.1855	30	208.656	86.3522	30	200.01	59.0579	30	158.553	89.424	30	201.073	93.288	30
	35	147.818	86.9586	35	39.9055	61.3996	35	136.865	77.8974	35	214.816	82.3947	35	181.894	72.111	35	20.3892	58.5455	35	132.45	83.2297	35	133.724	134.889	35	8.68075	52.5862	35	9.32225	79.3173	35	119.951	97.3513	35	13.412	80.704	35	165.297	76.7894	35	137.314	60.2615	35	159.037	90.3963	35	161.322	85.7586	35
	40	74.0065	83.3702	40	6.02425	70.5591	40	51.4246	115.899	40	63.245	98.3927	40	154.886	79.213	40	0	62.3086	40	60.2407	89.7227	40	28.8472	138.566	40	0	55.3648	40	0.02125	88.586	40	87.6293	99.3183	40	0	85.1292	40	63.4062	87.3746	40	36.3377	62.8126	40	83.962	93.8295	40	65.4248	95.5842	40
	45	1.4206	76.105	45	0	57.3559	45	2.5424	96.5584	45	2.921	99.0177	45	15.9585	99.055	45	0.8346	57.1777	45	20.0425	82.9952	45	3.58625	115.119	45	0	51.4173	45	0	95.017	45	42.4303	102.951	45	0	98.8485	45	18.5876	99.7326	45	3.929	68.4338	45	8.69933	100.804	45	8.1328	91.9734	45
	50	0	80.8702	50	0	60.1168	50	0	101.939	50	0	100.842	50	0	107.027	50	1.1114	59.4872	50	5.76833	82.8113	50	0.0236	132.374	50	0	46.7073	50	0	90.715	50	11.4842	116.091	50	0.0318	113.295	50	18.7666	103.802	50	0	68.2289	50	0	89.8005	50	0	98.7488	50
	55	0.1928	80.4588	55	0	60.5288	55	0.3498	84.6542	55	0	110.879	55	0	114.593	55	4.0554	59.8966	55	0.670667	64.4843	55	0.7664	117.466	55	2.24075	55.158	55	0	76.807	55	11.3807	117.939	55	0.8096	108.924	55	1.898	112.59	55	0	64.9551	55	0	93.3365	55	0	112.412	55
	60	1.4504	97.732	60	0.07	64.5414	60	2.2312	85.659	60	0	102.589	60	0	104.078	60	5.945	66.056	60	0.89625	73.0448	60	2.70025	108.255	60	4.424	55.905	60	1.28625	92.0812	60	6.088	108.123	60	1.1925	103.181	60	0	113.117	60	0.453	67.7955	60	0	95.039	60	0.179	103.759	60
	65	6.49	88.3	65	1.42325	67.0367	65	3.0352	113.05	65	1.07833	102.622	65	0.911	88.1983	65	7.3625	68.8633	65	2.57233	80.4203	65	3.9535	126.788	65	2.61375	55.643	65	1.8145	78.6168	65	7.45967	113.066	65	4.182	123.221	65	1.3024	94.9186	65	1.059	74.1902	65	0	95.183	65	0.9866	97.3418	65
	70	6.8106	104.583	70	2.868	54.5902	70	3.9046	111.727	70	2.11967	120.634	70	3.28725	81.2985	70	7.7806	57.2224	70	4.14775	80.5832	70	5.6115	110.166	70	2.511	45.0577	70	2.6085	81.2955	70	6.65375	124.701	70	8.071	119.093	70	2.7102	87.8914	70	1.02	66.4716	70	0	93.068	70	1.4306	104.708	70
	75	5.712	95.6968	75	2.0228	54.8518	75	3.5916	98.6702	75	3.323	116.076	75	3.92025	97.4578	75	9.7076	61.434	75	4.743	76.5657	75	5.58875	93.2283	75	2.375	32.6885	75	3.49325	83.159	75	8.9105	114.62	75	2.74325	106.995	75	2.4406	96.1478	75	1.4175	57.9858	75	0.553	79.2395	75	1.1908	97.3978	75
	80	6.3244	89.564	80	2.977	56.5564	80	3.1982	80.2	80	3.6605	106.672	80	3	101.529	80	8.4116	58.3882	80	4.6735	78.4988	80	3.76025	104.257	80	3	34.8937	80	4.31025	76.795	80	10.0013	110.513	80	3.40275	90.0823	80	3.5414	103.69	80	2	56.0492	80	0.875	79.4347	80	2.9704	104.56	80
	85	4.2296	71.0904	85	3.5625	56.3933	85	3.6354	58.5598	85	3	92.4737	85	4.12075	93.1148	85	9.2922	66.1	85	4.513	87.2953	85	4.092	112.953	85	2.67975	46.4907	85	3.911	79.77	85	13.025	109.615	85	3.07275	81.721	85	2.9526	105.552	85	1.969	61.7807	85	1.66525	89.0318	85	2.6252	94.0404	85
	90	4.97875	87.3443	90	2.2055	66.0029	90	3	76.552	90	3	89.172	90	4.97367	111.84	90	8.77375	74.3436	90	4.9145	93.6725	90	6.197	105.632	90	3	49.4815	90	2.0045	99.8912	90	15.3903	112.859	90	2.80425	101.073	90	3.8792	108.178	90	1.54475	69.2822	90	2.432	102.938	90	2.0032	93.6798	90
	95	11.8662	110.815	95	3.55975	65.3807	95	3	100.874	95	3.31633	103.119	95	3.799	118.642	95	6.7256	70.2311	95	4.73967	111.238	95	4.60625	99.9458	95	3	49.3193	95	2.145	101.873	95	15.0655	123.134	95	4.105	109.233	95	5.223	112.283	95	1.891	72.3558	95	1.858	96.0507	95	3.9986	122.383	95
	100	7.307	94.5046	100	5.0314	65.5458	100	4.54367	108.889	100	3	104.659	100	3.72925	103.809	100	8.0306	72.0779	100	5.25775	141.633	100	4.1132	108.22	100	2.59	61.5325	100	4.4775	101.21	100	10.4492	117.277	100	3.262	104.041	100	3.041	129.339	100	2	71.4399	100	1.164	87.5265	100	4.284	131.305	100
			72.191			58.3747			80.2591			90.4979			75.0482			46.5005			91.5915			117.368			49.9328			73.0068			87.8602			90.2933			81.2487			62.6756			91.7556			93.0927
			79.1447			59.3339			94.3839			103.58			106.892			58.8538			76.7636			121.653			51.0942			87.513			112.327			107.022			105.375			67.2059			94.647			101.045
[truncated: 46 more columns]

## Sheet: Summary
% Chromosome Length		Mean	STDDEV	SEM		Mean	STDDEV	SEM
0-5	FISH	0.223979	0.587327	0.109064	PI	170.58	34.8546	6.47234
5-10		2.42064	4.95075	0.919331		160.231	31.0102	5.75845
10-15		25.4481	38.4173	7.13391		133.613	36.489	6.77584
15-20		83.856	65.6164	12.1847		93.4632	32.9895	6.12599
20-25		150.505	39.1302	7.2663		75.2142	18.8301	3.49665
25-30		152.382	49.2564	9.14668		76.8368	18.4336	3.42303
30-35		116.673	66.0731	12.2695		79.7542	17.1122	3.17766
35-40		47.2258	41.5616	7.71779		85.0023	19.9291	3.70074
40-45		7.64922	10.9538	2.03406		84.3471	20.1666	3.74485
45-50		1.32952	4.02191	0.746851		85.6896	22.2274	4.12753
50-55		0.830335	2.1753	0.403943		87.0144	21.717	4.03275
55-60		1.28805	1.70356	0.316343		89.4386	18.574	3.44911
60-65		2.16217	2.04815	0.380331		88.8074	20.7939	3.86132
65-70		2.91857	2.21663	0.411617		86.9144	21.6968	4.02899
70-75		3.42934	2.94574	0.547011		83.2557	19.7417	3.66594
75-80		4.01308	2.88023	0.534845		80.6317	20.8437	3.87058
80-85		3.81497	2.46949	0.458572		80.0517	18.8558	3.50144
85-90		4.09045	3.32311	0.617085		87.1817	19.1446	3.55506
90-95		3.92524	2.90494	0.539434		95.669	21.7961	4.04743
95-100		3.61726	2.06895	0.384194		100.9	24.0526	4.46646
