# Supplementary material for: Large domains of heterochromatin direct the formation of short mitotic chromosome loops
Source: eLife. 2020 Sep 11;9:e57212. doi: 10.7554/eLife.57212 (PMC7515631; doi:10.7554/eLife.57212)
Supplement: Figure 5—source data 3. [file elife-57212-fig5-data3.xlsx]

## Sheet: All Data
1	FISH		PI	2	FISH		PI	3	FISH		PI	4	FISH		PI	4B	FISH		PI	5	FISH		PI	6	FISH		PI	8	FISH		PI	9	FISH		PI	10	FISH		PI	11	FISH		PI	12	FISH		PI	13	FISH
X	Y	X	Y	X	Y	X	Y	X	Y	X	Y	X	Y	X	Y	X	Y	X	Y	X	Y	X	Y	X	Y	X	Y	X	Y	X	Y	X	Y	X	Y	X	Y	X	Y	X	Y	X	Y	X	Y	X	Y	X	Y
0	1	0	162	0	2	0	158	0	1	0	136	0	1	0	207	0	1	0	168	0	1	0	153	0	2	0	214	0	3	0	174	0	5	0	178	0	3	0	157	0	6	0	232	0	2	0	210	0	2
1	1.167	1	160.014	1	1.181	1	164.915	1	1	1	138.346	1	1	1	215.945	1	1	1	167.931	1	1	1	160.781	1	2.8	1	235	1	3.492	1	178.819	1	4.004	1	174.218	1	2.553	1	159.942	1	6	1	247.114	1	2.265	1	215.845	1	2
2	0.356	2	160.32	2	1	2	170.318	2	1	2	138.547	2	1	2	225.223	2	1	2	167.259	2	1	2	161.02	2	2.92	2	237.68	2	4	2	173.278	2	4	2	172.812	2	2.811	2	167.039	2	5.007	2	248.16	2	2.519	2	215.236	2	2
3	0.493	3	156.683	3	1	3	173.404	3	1	3	135.669	3	1.207	3	227.533	3	1	3	162.233	3	1.488	3	158.544	3	3.4	3	238.16	3	4.585	3	166.186	3	3.309	3	181.192	3	3.342	3	172.866	3	5	3	228.7	3	3	3	208.881	3	2
4	0.036	4	158.242	4	1	4	173.573	4	1	4	130.129	4	1.148	4	222.99	4	1	4	157.894	4	1.985	4	155.664	4	3.48	4	231.96	4	5.48	4	157.661	4	3.988	4	177.078	4	3.667	4	175.456	4	4.341	4	208.29	4	3	4	193.735	4	2
5	0	5	147.958	5	1	5	171.59	5	1	5	123.021	5	1.684	5	211.569	5	1.426	5	157.563	5	2.481	5	144.918	5	3	5	208	5	5.64	5	148.761	5	4	5	183.334	5	3.764	5	176.777	5	3.432	5	189.162	5	3	5	170.107	5	2
6	0	6	140.523	6	1	6	166.942	6	1	6	118.149	6	2.221	6	202.941	6	1	6	160.161	6	2.977	6	134.807	6	2.08	6	192.04	6	5.062	6	147.1	6	4.579	6	190.015	6	2.95	6	172.316	6	3.01	6	172.339	6	2.497	6	145.953	6	2
7	0	7	137.169	7	1	7	159.188	7	1.026	7	117.345	7	2.758	7	187.463	7	1	7	163.543	7	3.909	7	120.677	7	2	7	173.48	7	4.323	7	146.026	7	4.989	7	192.031	7	1.709	7	162.588	7	3	7	155.653	7	2	7	123.998	7	2.169
8	0	8	131.545	8	0.446	8	157.105	8	1	8	117.642	8	3.295	8	165.862	8	1	8	175.573	8	4.021	8	111.433	8	2	8	154.12	8	3.896	8	145.035	8	5.196	8	193.133	8	1.078	8	153.512	8	3	8	127.441	8	2	8	108.32	8	2.392
9	0	9	126.756	9	0	9	152.74	9	1	9	118.915	9	3.339	9	143.525	9	1	9	173.239	9	3.272	9	96.783	9	2	9	144.04	9	3.934	9	146.392	9	6.06	9	177.463	9	1	9	138.668	9	3	9	104.195	9	2	9	102.595	9	2.993
10	0	10	113.655	10	0	10	135.526	10	1	10	117.815	10	3.369	10	129.358	10	1	10	156.861	10	2.318	10	82.735	10	2	10	142	10	3.726	10	149.455	10	7.901	10	158.928	10	1	10	118.226	10	3	10	93.368	10	2.572	10	114.117	10	3.527
11	0.617	11	98.51	11	0.316	11	117.169	11	1	11	115.424	11	3.906	11	121.41	11	1.047	11	145.59	11	2.252	11	70.701	11	3.2	11	135.72	11	3	11	151.076	11	8.934	11	147.095	11	0.81	11	100.533	11	3	11	82.122	11	3.451	11	124.251	11	4.045
12	0.971	12	85.324	12	0.98	12	107.912	12	1	12	106.666	12	4.443	12	118.241	12	1.955	12	140.056	12	3.373	12	63.094	12	3.6	12	130.96	12	3	12	147.775	12	10.866	12	134.957	12	0.623	12	88.49	12	2.997	12	81.98	12	4.554	12	130.846	12	5.174
13	0.292	13	73.313	13	1	13	100.168	13	1	13	93.5205	13	4.979	13	116.065	13	2.327	13	136.876	13	5.024	13	59.005	13	3.4	13	126.28	13	3	13	145.323	13	11	13	120.181	13	1	13	81.827	13	3.08	13	89.793	13	5.693	13	130.794	13	5.446
14	0	14	66.767	14	1	14	92.038	14	1.5	14	81.8612	14	5.239	14	114.353	14	2.14	14	133.594	14	6.799	14	58.728	14	3	14	125.44	14	3	14	145.765	14	9.169	14	107.141	14	1	14	81.907	14	3.317	14	96.677	14	6.293	14	123.942	14	4.562
15	0	15	60.549	15	1	15	86.427	15	2	15	72.7581	15	5.06	15	108.558	15	2.079	15	136.603	15	6.408	15	59.839	15	3	15	125	15	3	15	139.459	15	6.594	15	103.656	15	1	15	83.902	15	3.491	15	98.896	15	6.671	15	119.314	15	4.389
16	0	16	55.478	16	0.242	16	82.502	16	2	16	66.7869	16	5	16	98.705	16	2.017	16	126.141	16	5.21	16	64.429	16	2.4	16	122.8	16	3.086	16	132.441	16	6.92	16	101.251	16	1	16	87.335	16	3.657	16	96.787	16	6.315	16	114.938	16	5.208
17	0	17	55.548	17	0	17	82.596	17	2.009	17	62.0206	17	4.119	17	93.272	17	1.287	17	113.251	17	3.045	17	69.244	17	2	17	118.8	17	3	17	124.401	17	7.072	17	102.712	17	0.749	17	92.354	17	4.377	17	95.439	17	4.434	17	105.908	17	6.096
18	0	18	56.681	18	0	18	82.433	18	2.668	18	63.7316	18	3.148	18	89.543	18	0.641	18	104.927	18	2.026	18	72.653	18	2.4	18	112	18	3	18	111.881	18	8.671	18	103.665	18	0.014	18	94.187	18	4.969	18	91.704	18	2.498	18	97.213	18	6.984
19	0	19	56.568	19	0	19	82.855	19	2.738	19	66.2803	19	2.261	19	90.009	19	0.739	19	106.99	19	1.289	19	73.495	19	3.4	19	108.2	19	3	19	102.779	19	11.089	19	104.065	19	0	19	94.324	19	5.394	19	95.471	19	0.898	19	90.09	19	7
20	0	20	58.065	20	0	20	88.998	20	3	20	69.7573	20	2	20	97.862	20	1.005	20	115.79	20	1	20	74.337	20	5	20	112	20	3	20	96.419	20	13.962	20	103.452	20	0	20	100.447	20	6.586	20	98.808	20	0.582	20	88.066	20	6.606
21	0	21	59.923	21	0	21	89.997	21	3	21	74.7014	21	2	21	108.415	21	1.999	21	119.388	21	1.652	21	73.751	21	8	21	117.16	21	3	21	88.621	21	12.82	21	106.009	21	0	21	112.992	21	8.367	21	102.693	21	0.415	21	96.081	21	5.464
22	0	22	58.659	22	0	22	82.92	22	3	22	75.1329	22	2	22	115.402	22	4.15	22	117.421	22	3.008	22	74.136	22	10.2	22	121.8	22	3	22	86.349	22	10.216	22	108.136	22	0	22	122.774	22	8.346	22	104.563	22	1	22	98.593	22	4.41
23	0.58	23	57.689	23	0	23	79.925	23	2.807	23	70.2812	23	2	23	121.976	23	6.125	23	115.135	23	3.97	23	73.35	23	10.2	23	125.84	23	3	23	86.602	23	7.904	23	109.591	23	0	23	127.207	23	8.097	23	111.973	23	1	23	95.124	23	3.756
24	0.335	24	57.465	24	0	24	82.521	24	2	24	71.2964	24	2	24	125.772	24	8.428	24	117.923	24	5.676	24	76.475	24	8.6	24	137.84	24	3	24	92.155	24	7.054	24	113.866	24	0	24	127.396	24	8.007	24	115.742	24	0.95	24	84.802	24	3.3
25	0.956	25	58.607	25	0	25	88.604	25	2	25	74.251	25	2.517	25	128.323	25	11.139	25	123.27	25	7.43	25	72.241	25	7	25	147	25	3	25	97.39	25	5.382	25	119.818	25	0	25	131.738	25	9.019	25	115.22	25	0.001	25	82.003	25	3.704
26	2.571	26	61.283	26	0	26	101.071	26	2.846	26	74.2295	26	3.96	26	130.718	26	11.903	26	124.328	26	7.833	26	66.712	26	4.6	26	137.56	26	3.291	26	104.707	26	5.123	26	119.092	26	0	26	132.632	26	10.835	26	109.394	26	0	26	81.684	26	4.132
27	3.141	27	59.998	27	0	27	114.421	27	4.536	27	75.7321	27	6.095	27	129.203	27	10.735	27	122.096	27	6.325	27	64.524	27	3.12	27	131.44	27	3.695	27	106.693	27	5.536	27	114.873	27	0	27	124.222	27	13.103	27	107.731	27	0	27	84.293	27	4.56
28	2.918	28	54.79	28	0	28	122.449	28	6.633	28	75.6763	28	7.339	28	125.789	28	8.174	28	120.191	28	5.46	28	66.507	28	3.2	28	133.4	28	4.315	28	99.69	28	6.195	28	112.77	28	0	28	116.287	28	17.83	28	103.974	28	0	28	90.686	28	4.124
29	1.596	29	57.3	29	0	29	128.303	29	7.243	29	72.9506	29	7.393	29	125.911	29	5.594	29	109.922	29	5.572	29	71.328	29	3.52	29	141.72	29	4.349	29	95.474	29	6.971	29	115.607	29	0	29	106.998	29	24.017	29	97.884	29	0	29	92.319	29	3.165
30	0.327	30	60.462	30	0	30	128.4	30	6.215	30	68.3713	30	7.044	30	126.23	30	3.291	30	102.473	30	5.884	30	77.21	30	3	30	147	30	4.001	30	94.998	30	7.343	30	114.034	30	0	30	102.11	30	35.954	30	93.398	30	0	30	90.977	30	3
31	0	31	63.393	31	0	31	121.302	31	4.158	31	66.8815	31	7.111	31	133.035	31	2.22	31	107.694	31	6	31	83.661	31	4	31	135	31	3.372	31	89.538	31	7	31	116.996	31	0	31	102.144	31	59.12	31	91.746	31	0	31	91.342	31	3.39
32	0	32	66.986	32	0	32	112.869	32	2.848	32	67.6084	32	6.576	32	143.781	32	2.913	32	114.143	32	5.903	32	94.581	32	5	32	128.92	32	3.114	32	80.701	32	6.584	32	117.05	32	0	32	99.829	32	98.169	32	88.433	32	0	32	92.273	32	4.846
33	0	33	67.683	33	0	33	105.745	33	1.964	33	70.2948	33	6.221	33	149.312	33	3.726	33	118.904	33	5.247	33	103.393	33	6.4	33	127.24	33	3	33	81.113	33	7.049	33	114.344	33	0.055	33	96.575	33	135.966	33	82.762	33	0	33	94.027	33	7.087
34	0	34	69.325	34	0	34	94.931	34	1.079	34	69.3613	34	6.816	34	155.356	34	5.282	34	121.84	34	5	34	107.829	34	9.64	34	127.28	34	3.245	34	90.133	34	7.204	34	112.874	34	0.613	34	94.055	34	170.678	34	84.773	34	0.537	34	96.919	34	10.524
35	0	35	70.942	35	0	35	83.23	35	1	35	68.6025	35	5.988	35	149.043	35	5.956	35	120.975	35	5	35	112.238	35	17	35	129	35	4.183	35	102.262	35	6.661	35	117.144	35	2.532	35	89.818	35	204.394	35	88.768	35	3.021	35	93.626	35	15.334
36	0	36	71.853	36	0	36	75.362	36	1	36	70.8273	36	5.911	36	144.984	36	5.308	36	117.891	36	6.094	36	107.124	36	30.8	36	127.12	36	5	36	124.985	36	5.999	36	123.534	36	7.531	36	82.797	36	222.4	36	89.81	36	10.216	36	87.061	36	19.945
37	0	37	73.735	37	0	37	73.038	37	0.552	37	72.7918	37	5.639	37	140.592	37	4.224	37	108.341	37	8.076	37	96.046	37	49.96	37	120.28	37	4.975	37	148.775	37	5.189	37	122.325	37	23.232	37	76.306	37	208.319	37	93.371	37	28.828	37	84.411	37	28.698
38	0	38	74.95	38	0	38	76.928	38	0.372	38	73.3422	38	8.709	38	136.031	38	2.854	38	96.666	38	10.036	38	84.876	38	81.72	38	109.68	38	4.227	38	151.102	38	5.801	38	117.79	38	64.7	38	72.151	38	161.31	38	100.928	38	70.882	38	83.041	38	37.009
39	0	39	72.753	39	3.024	39	81.286	39	0.443	39	74.283	39	16	39	132	39	1.336	39	94.116	39	14.256	39	80.249	39	125.8	39	101.92	39	2.942	39	143.067	39	6.735	39	113.713	39	128.216	39	70.242	39	99.918	39	107.565	39	139.225	39	84.761	39	50.745
40	0	40	68.452	40	17.367	40	82.461	40	1	40	76.1953	40	31.811	40	130.784	40	1.056	40	95.896	40	24.463	40	82.26	40	169	40	102	40	1.657	40	138.242	40	8.433	40	119.626	40	187.196	40	76.076	40	54.398	40	108.111	40	204.195	40	94.723	40	69.316
41	0	41	64.627	41	49.261	41	81.391	41	1.223	41	77.9423	41	52.439	41	120.845	41	1.824	41	94.279	41	42.262	41	85.58	41	203.12	41	102.24	41	1.035	41	132.159	41	13.405	41	120.075	41	213.242	41	86.117	41	31.505	41	105.403	41	233.424	41	102.38	41	90.603
42	0	42	59.396	42	89.182	42	79.899	42	2.992	42	79.1001	42	70.645	42	112.025	42	4.36	42	87.257	42	57.945	42	83.605	42	220.68	42	111.24	42	0.253	42	118.464	42	27.019	42	122.272	42	212.387	42	96.946	42	17.131	42	97.88	42	228.904	42	104.839	42	110.12
43	0	43	54.352	43	121.973	43	79.088	43	5.679	43	75.4903	43	79.444	43	106.5	43	9.325	43	85.93	43	64.499	43	78.002	43	224	43	121.96	43	0	43	103.79	43	41.281	43	127.917	43	176.669	43	99.65	43	8.282	43	97.257	43	200.287	43	104.73	43	125.368
44	0.226	44	55.739	44	147.573	44	79.375	44	12.679	44	66.0154	44	76.448	44	102.714	44	18.907	44	84.906	44	62.983	44	72.677	44	203.04	44	129.76	44	0	44	98.551	44	50.558	44	128.746	44	125.695	44	94.436	44	2.46	44	105.274	44	162.164	44	101.276	44	141.371
45	4.352	45	54.524	45	167.316	45	81.986	45	31.487	45	57.5391	45	72.803	45	104.684	45	37.351	45	82.297	45	62.506	45	67.608	45	160	45	128	45	0	45	99.927	45	47.766	45	118.749	45	80.823	45	94.136	45	0.305	45	111.582	45	135.686	45	94.136	45	161.434
46	21.422	46	52.105	46	181.695	46	83.354	46	64.81	46	49.9565	46	82.416	46	110.051	46	65.975	46	77.211	46	74.756	46	63.69	46	112.84	46	118.52	46	0	46	104.309	46	39.399	46	108.562	46	45.083	46	95.669	46	0	46	117.701	46	96.722	46	85.81	46	183.064
47	58.1	47	51.848	47	185.981	47	83.687	47	101.967	47	47.1637	47	110.959	47	102.363	47	95.997	47	77.149	47	96.984	47	61.107	47	82.24	47	108.48	47	0	47	113.5	47	39.091	47	101.835	47	23.908	47	98.369	47	0	47	121.809	47	53.527	47	83.727	47	182.531
48	113.924	48	52.109	48	168.625	48	85.821	48	130.054	48	48.8666	48	143.591	48	95.494	48	122.21	48	79.378	48	118.982	48	58.867	48	58.12	48	102.88	48	0	48	124.793	48	54.402	48	100.602	48	14.43	48	96.348	48	0	48	113.905	48	19.686	48	79.359	48	150.255
49	165.502	49	51.287	49	128.521	49	92.26	49	140.571	49	50.5558	49	182.658	49	100.776	49	130.917	49	84.028	49	137.45	49	61.134	49	36.16	49	104.4	49	0	49	131.315	49	88.053	49	98.8264	49	9.284	49	90.506	49	0	49	106.114	49	3.468	49	76.087	49	95.04
50	181.063	50	52.37	50	76.817	50	105.107	50	139.933	50	54.7419	50	196.804	50	106.505	50	117.845	50	90.652	50	143.084	50	67.46	50	17	50	113	50	0	50	130.048	50	128.497	50	99.1612	50	5.94	50	89.613	50	0	50	99.628	50	0.157	50	72.738	50	46.14
51	175.023	51	52.44	51	33.599	51	120.01	51	131.089	51	61.3134	51	155.992	51	111.895	51	98.635	51	95.373	51	127.476	51	72.144	51	7.64	51	133.44	51	0	51	123.065	51	158.325	51	101.289	51	4.975	51	89.878	51	0	51	93.822	51	0	51	74.116	51	17.159
52	173.543	52	55.027	52	11.455	52	129.571	52	122.479	52	62.5314	52	95.662	52	120.121	52	76.669	52	98.392	52	93.609	52	77.038	52	3.12	52	147	52	0	52	112.643	52	162.695	52	101.811	52	4.196	52	87.098	52	0	52	92.047	52	0	52	80.902	52	4.071
53	185.808	53	61.787	53	4.708	53	128.303	53	109.09	53	64.8239	53	43.867	53	125.623	53	54.998	53	98.345	53	57.812	53	84.253	53	2.2	53	151.2	53	0	53	101.331	53	137.685	53	106.334	53	4	53	92.005	53	0	53	95.332	53	0	53	87.039	53	0.588
54	194.783	54	68.393	54	3.797	54	120.204	54	85.352	54	66.4445	54	14.978	54	123.464	54	40.656	54	93.508	54	32.671	54	92.811	54	2	54	150.2	54	0	54	93.206	54	101.514	54	110.895	54	3.803	54	95.327	54	0	54	96.777	54	0	54	94.571	54	0.008
55	164.774	55	72.673	55	4.487	55	109.871	55	57.966	55	65.8124	55	3.563	55	121.549	55	28.876	55	87.436	55	15.455	55	98.113	55	2	55	151	55	0	55	87.587	55	71.788	55	111.97	55	4.57	55	101.906	55	0	55	97.183	55	0	55	89.779	55	0
56	85.007	56	74.97	56	7.329	56	100.214	56	33.454	56	66.8463	56	0.056	56	119.552	56	18.739	56	84.052	56	5.133	56	95.404	56	2	56	145.68	56	0	56	85.111	56	50.968	56	112.799	56	4.967	56	109.927	56	0	56	100.824	56	0	56	83.919	56	0
57	25.404	57	76.658	57	10.749	57	94.139	57	15.295	57	68.9659	57	0	57	116.702	57	11.106	57	81.425	57	1.211	57	90.105	57	1.8	57	143.52	57	0	57	84.774	57	35.525	57	116.262	57	5.924	57	117.013	57	0	57	108.627	57	0	57	86.649	57	0
58	5.438	58	76.038	58	14.443	58	95.759	58	5.354	58	71.6216	58	0	58	121.434	58	7.767	58	82.166	58	0.329	58	89.06	58	1.2	58	140.88	58	0.585	58	86.881	58	20.753	58	123.305	58	6	58	120.625	58	0.71	58	116.925	58	0	58	90.106	58	0
59	0.556	59	73.222	59	14.09	59	107.17	59	0.992	59	68.0163	59	0	59	130.481	59	5.005	59	82.389	59	0	59	90.999	59	1.2	59	138.24	59	4.496	59	92.484	59	10.148	59	126.461	59	6	59	130.107	59	1.641	59	123.812	59	0.693	59	87.208	59	0
60	0	60	69.974	60	12.95	60	118.979	60	0.008	60	65.2649	60	0	60	133.002	60	1.966	60	84.604	60	0	60	91.389	60	2	60	136	60	13.469	60	102.193	60	5.625	60	133.643	60	6.802	60	132.684	60	1.304	60	124.161	60	0.242	60	80.854	60	0
61	0	61	69.167	61	14.453	61	124.402	61	0	61	61.9918	61	0	61	119.933	61	0	61	80.694	61	0	61	92.29	61	4.201	61	129.214	61	29.003	61	114.475	61	2.653	61	139.027	61	6.249	61	133.689	61	0.953	61	123.847	61	0	61	77.421	61	0
62	0	62	69.738	62	16.15	62	128.173	62	0	62	59.2895	62	0	62	107.267	62	0	62	73.482	62	0	62	89.583	62	5.619	62	125.803	62	55.587	62	120.217	62	1.424	62	139.688	62	5.463	62	137.196	62	1	62	128.274	62	0	62	77.832	62	0
63	0	63	71.341	63	17.222	63	127.031	63	0	63	57.3366	63	0	63	98.432	63	0	63	69.405	63	0	63	84.505	63	14.01	63	124.76	63	93.93	63	115.078	63	0.215	63	136.447	63	4.545	63	144.287	63	1	63	129.101	63	0	63	83.804	63	0
64	0	64	73.424	64	17.493	64	121.286	64	0	64	55.0335	64	0	64	95.716	64	0	64	69.376	64	0	64	84.031	64	19.844	64	128.248	64	136.516	64	106.189	64	0	64	131.302	64	5.114	64	157.323	64	1	64	127.927	64	0	64	90.618	64	0
65	0	65	71.191	65	18.237	65	116.348	65	0	65	52.7791	65	0	65	92.11	65	0	65	74.74	65	0	65	86.191	65	15.911	65	131.272	65	169.552	65	100.915	65	0	65	119.203	65	7.092	65	169.152	65	1	65	125.678	65	0	65	94.743	65	0
66	0	66	66.308	66	24.859	66	116.928	66	0	66	52.1868	66	0	66	91.846	66	0	66	80.027	66	0	66	88.018	66	10.147	66	126.833	66	186.691	66	99.862	66	0	66	109.605	66	8.493	66	166.061	66	1	66	123.847	66	0.367	66	92.565	66	0
67	0	67	64.061	67	37.482	67	126.322	67	0	67	54.1882	67	0	67	91.687	67	0	67	86.843	67	0	67	88.479	67	5.62	67	122.297	67	184.83	67	100.867	67	0	67	100.789	67	9.186	67	150.98	67	1	67	123.224	67	2.002	67	91.05	67	0
68	0	68	64.231	68	50.756	68	141.844	68	0	68	54.8325	68	0	68	92.553	68	0	68	90.199	68	0	68	88.992	68	4.832	68	121.254	68	169.6	68	101.836	68	0	68	96.7825					68	1	68	126.197	68	4.981	68	92.389	68	0
69	0	69	67.398	69	48.894	69	159.748	69	0	69	54.0554	69	0	69	96.263	69	0.147	69	94.601	69	0.212	69	90.791	69	5.769	69	122.366	69	153.335	69	100.871	69	0	69	98.7953					69	1.661	69	126.396	69	9.268	69	91.748	69	0
70	0	70	70.133	70	31.99	70	168.276	70	0	70	55.658	70	0	70	95.612	70	0.866	70	96.861	70	1.161	70	92.138	70	5.571	70	122.418	70	131.298	70	100.286	70	0	70	107.994					70	1.9	70	128.211	70	12.309	70	88.729	70	0.091
71	0	71	71.523	71	16.902	71	177.217	71	0	71	58.5522	71	0.127	71	96.602	71	1.474	71	100.067	71	1.95	71	90.063	71	4.675	71	123.047	71	90.611	71	98.845	71	0	71	117.24					71	2.212	71	131.065	71	9.94	71	86.677	71	1.116
72	0	72	72.178	72	8.492	72	184.348	72	0	72	60.9073	72	1.103	72	97.924	72	1.961	72	99.425	72	1.776	72	84.036	72	6.039	72	131.766	72	51.366	72	98.393	72	0	72	128.483					72	1.981	72	133.099	72	6.002	72	90.435	72	2.461
73	0	73	70.77	73	5.495	73	194.47	73	0.267	73	61.5194	73	1.663	73	95.732	73	2.806	73	100.561	73	1.602	73	78.418	73	6.848	73	141.773	73	27.91	73	100.393	73	0.191	73	136.576					73	2	73	135.022	73	2.882	73	90.706	73	2.998
74	0	74	67.74	74	4.525	74	191.867	74	0.913	74	60.3267	74	1.906	74	88.188	74	3.773	74	105.949	74	1.428	74	71.451	74	5.189	74	151.42	74	14.733	74	104.498	74	1.304	74	137.649					74	1.198	74	136.032					74	2.108
75	0	75	66.42	75	3.622	75	175.743	75	1.188	75	58.2094	75	1.556	75	80.023	75	4.344	75	110.325	75	1.312	75	66.497	75	4.211	75	155.799	75	8.53	75	112.938	75	1.904	75	137.414													75	1.375
76	0	76	65.74					76	1.18	76	56.6089	76	1.171	76	79.688	76	6.468	76	110.094	76	1.354	76	64.854	76	4.537	76	148.63	76	5.286	76	119.003	76	1.667	76	139.36													76	1
77	0	77	64					77	1.963	77	56.0952	77	1	77	85.795	77	9.155	77	111.967	77	1.907	77	68.58	77	4.802	77	147.524	77	3.996	77	123.263	77	1.577	77	143.804													77	1
78	0	78	66.1					78	1.916	78	59.8399	78	1	78	93.52	78	13.495	78	114.687	78	1.781	78	77.655	78	4.419	78	156.972	78	4.083	78	122.35	78	1.785	78	153.025													78	1
79	0	79	69					79	1.136	79	66.7484	79	1.118	79	92.139	79	19.374	79	115.83	79	2.164	79	86.774	79	3.627	79	160.629	79	5.321	79	112.167	79	2	79	163.96													79	1.564
80	0	80	69.84					80	1	80	73.1212	80	1.361	80	84.505	80	24.676	80	119.317	80	3.149	80	89.565	80	3.342	80	157.775	80	7.439	80	103.011	80	2	80	178.095													80	2.164
81	0	81	71.84					81	0.732	81	76.2682	81	1.603	81	79.527	81	26.054	81	124.935	81	4.239	81	87.819					81	8.346	81	98.437	81	4.343	81	176.796													81	2.495
82	0	82	74.26					82	0.4	82	79.4712	82	1.846	82	78.649					82	6.076	82	84.132					82	7.058	82	100.777	82	7.087	82	172.601													82	2.309
83	0	83	78.1					83	0.992	83	88.1297	83	2.057	83	83.453					83	7	83	82.227					83	5.118	83	110.046	83	8.723	83	157.802													83	2.046
84	0	84	81.42					84	1	84	92.1047	84	1.786	84	92.707					84	6.912	84	82.416					84	4.731	84	120.688	84	9.176	84	145.081
85	0	85	81.16					85	1	85	92.822	85	0.978	85	99.605					85	5.963	85	83.276					85	5	85	126.405	85	6.774	85	145.577
86	0	86	82.1					86	1.399	86	88.867	86	0.601	86	105.824					86	5.6	86	84.304					86	5.243	86	122.552	86	5.082	86	143.865
87	0.45	87	87.896									87	0.059	87	117.39					87	4.831	87	87.935					87	5.076	87	113.218	87	4.191	87	152.472
88	1	88	93.301									88	0.301	88	133.865													88	4.493	88	107.926	88	4.551	88	157.17
89	1.396	89	95.624									89	0.544	89	142.081													89	3.747	89	108.588	89	4.814	89	152.079
90	2	90	98.979									90	0.786	90	139.39													90	2.576	90	113.725
91	1.765	91	106.426																									91	2	91	118.479
92	1.148	92	111.019																									92	2.474	92	115.464
93	0.677	93	109.684																									93	2.986	93	108.327
																												94	3	94	105.546
																												95	3.396	95	109.787
																												96	3.644	96	116.715
																												97	3.259	97	123.395
																												98	3	98	126.315
																												99	3.363	99	126.281
																												100	4.377	100	127.767
																												101	6.072	101	129.071
																												102	9.034	102	129.434
																												103	11.039	103	127.03
																												104	10.847	104	120.131
																												105	8.791	105	117.155
																												106	5.982	106	121.519
																												107	4.528	107	126.548
																												108	3.592	108	133.146
																												109	3	109	146.955
																												110	2.765	110	170.896
																												111	2.493	111	193.813
																												112	2.381	112	204.619
																												113	2.239	113	200.369
																												114	2.381	114	181.391
[truncated: 86 more columns]

## Sheet: Binned
8	1	FISH	PI	2	FISH	PI	3	FISH	PI	4	FISH	PI	4B	FISH	PI	5	FISH	PI	6	FISH	PI	8	FISH	PI	9	FISH	PI	10	FISH	PI	11	FISH	PI	12	FISH	PI	13	FISH	PI	14	FISH	PI	15	FISH	PI	16	FISH	PI	17
X	X	Y	Y	X	Y	Y	X	Y	Y	X	Y	Y	X	Y	Y	X	Y	Y	X	Y	Y	X	Y	Y	X	Y	Y	X	Y	Y	X	Y	Y	X	Y	Y	X	Y	Y	X	Y	Y	X	Y	Y	X	Y	Y	X
0	0	1	162	0	2	158	0	1	136	0	1	207	0	1	168	0	1	153	0	2	214	0	3	174	0	5	178	0	3	157	0	6	232	0	2	210	0	2	167	0	2	178	0	2	196	0	2	198	0
1	1.07527	1.167	160.014	1.33333	1.181	164.915	1.16279	1	138.346	1.11111	1	215.945	1.23457	1	167.931	1.14943	1	160.781	1.25	2.8	235	0.877193	3.492	178.819	1.1236	4.004	174.218	1.49254	2.553	159.942	1.35135	6	247.114	1.36986	2.265	215.845	1.20482	2	183.515	1.14943	2.367	181.937	1.5625	2	190.8	1.31579	3.6	215.24	1.20482
2	2.15054	0.356	160.32	2.66667	1	170.318	2.32558	1	138.547	2.22222	1	225.223	2.46914	1	167.259	2.29885	1	161.02	2.5	2.92	237.68	1.75439	4	173.278	2.24719	4	172.812	2.98507	2.811	167.039	2.7027	5.007	248.16	2.73973	2.519	215.236	2.40964	2	189.023	2.29885	2.802	172.851	3.125	2	189.92	2.63158	4.2	213.28	2.40964
3	3.22581	0.493	156.683	4	1	173.404	3.48837	1	135.669	3.33333	1.207	227.533	3.7037	1	162.233	3.44828	1.488	158.544	3.75	3.4	238.16	2.63158	4.585	166.186	3.37079	3.309	181.192	4.47761	3.342	172.866	4.05405	5	228.7	4.10959	3	208.881	3.61446	2	187.462	3.44828	3.202	166.249	4.6875	2.4	181.48	3.94737	3	200.6	3.61446
4	4.30108	0.036	158.242	5.33333	1	173.573	4.65116	1	130.129	4.44444	1.148	222.99	4.93827	1	157.894	4.5977	1.985	155.664	5	3.48	231.96	3.50877	5.48	157.661	4.49438	3.988	177.078	5.97015	3.667	175.456	5.40541	4.341	208.29	5.47945	3	193.735	4.81928	2	187.7	4.5977	2.538	160.477	6.25	2.6	167.28	5.26316	1.6	174.24	4.81928
5	5.37634	0	147.958	6.66667	1	171.59	5.81395	1	123.021	5.55556	1.684	211.569	6.17284	1.426	157.563	5.74713	2.481	144.918	6.25	3	208	4.38596	5.64	148.761	5.61798	4	183.334	7.46269	3.764	176.777	6.75676	3.432	189.162	6.84932	3	170.107	6.0241	2	184.54	5.74713	1.423	158.94	7.8125	2	151	6.57895	1	148	6.0241
6	6.45161	0	140.523	8	1	166.942	6.97674	1	118.149	6.66667	2.221	202.941	7.40741	1	160.161	6.89655	2.977	134.807	7.5	2.08	192.04	5.26316	5.062	147.1	6.74157	4.579	190.015	8.95522	2.95	172.316	8.10811	3.01	172.339	8.21918	2.497	145.953	7.22892	2	178.603	6.89655	1.405	149.756	9.375	2.471	137.121	7.89474	1.32	129.32	7.22892
7	7.52688	0	137.169	9.33333	1	159.188	8.13953	1.026	117.345	7.77778	2.758	187.463	8.64198	1	163.543	8.04598	3.909	120.677	8.75	2	173.48	6.14035	4.323	146.026	7.86517	4.989	192.031	10.4478	1.709	162.588	9.45946	3	155.653	9.58904	2	123.998	8.43373	2.169	167.045	8.04598	1.473	138.018	10.9375	2.221	128.121	9.21053	2.08	114.2	8.43373
8	8.60215	0	131.545	10.6667	0.446	157.105	9.30233	1	117.642	8.88889	3.295	165.862	9.87654	1	175.573	9.1954	4.021	111.433	10	2	154.12	7.01754	3.896	145.035	8.98876	5.196	193.133	11.9403	1.078	153.512	10.8108	3	127.441	10.9589	2	108.32	9.63855	2.392	143.805	9.1954	1	128.644	12.5	1.619	122.09	10.5263	3.48	98.72	9.63855
9	9.67742	0	126.756	12	0	152.74	10.4651	1	118.915	10	3.339	143.525	11.1111	1	173.239	10.3448	3.272	96.783	11.25	2	144.04	7.89474	3.934	146.392	10.1124	6.06	177.463	13.4328	1	138.668	12.1622	3	104.195	12.3288	2	102.595	10.8434	2.993	120.623	10.3448	1	122.842	14.0625	1.415	118.862	11.8421	4.84	86.96	10.8434
10	10.7527	0	113.655	13.3333	0	135.526	11.6279	1	117.815	11.1111	3.369	129.358	12.3457	1	156.861	11.4943	2.318	82.735	12.5	2	142	8.77193	3.726	149.455	11.236	7.901	158.928	14.9254	1	118.226	13.5135	3	93.368	13.6986	2.572	114.117	12.0482	3.527	106.49	11.4943	1	116.639	15.625	1.266	119.938	13.1579	5	79	12.0482
11	11.828	0.617	98.51	14.6667	0.316	117.169	12.7907	1	115.424	12.2222	3.906	121.41	13.5802	1.047	145.59	12.6437	2.252	70.701	13.75	3.2	135.72	9.64912	3	151.076	12.3596	8.934	147.095	16.4179	0.81	100.533	14.8649	3	82.122	15.0685	3.451	124.251	13.253	4.045	92.059	12.6437	1	113.476	17.1875	1.419	122.066	14.4737	3.2	75.2	13.253
12	12.9032	0.971	85.324	16	0.98	107.912	13.9535	1	106.666	13.3333	4.443	118.241	14.8148	1.955	140.056	13.7931	3.373	63.094	15	3.6	130.96	10.5263	3	147.775	13.4831	10.866	134.957	17.9104	0.623	88.49	16.2162	2.997	81.98	16.4384	4.554	130.846	14.4578	5.174	81.753	13.7931	1	107.979	18.75	2.125	121.837	15.7895	1.8	71.28	14.4578
13	13.9785	0.292	73.313	17.3333	1	100.168	15.1163	1	93.5205	14.4444	4.979	116.065	16.0494	2.327	136.876	14.9425	5.024	59.005	16.25	3.4	126.28	11.4035	3	145.323	14.6067	11	120.181	19.403	1	81.827	17.5676	3.08	89.793	17.8082	5.693	130.794	15.6627	5.446	73.988	14.9425	0.09	100.765	20.3125	2.308	118.443	17.1053	1.12	68.32	15.6627
14	15.0538	0	66.767	18.6667	1	92.038	16.2791	1.5	81.8612	15.5556	5.239	114.353	17.284	2.14	133.594	16.092	6.799	58.728	17.5	3	125.44	12.2807	3	145.765	15.7303	9.169	107.141	20.8955	1	81.907	18.9189	3.317	96.677	19.1781	6.293	123.942	16.8675	4.562	72.93	16.092	0	94.124	21.875	2.72	121.913	18.4211	0.8	65.96	16.8675
15	16.129	0	60.549	20	1	86.427	17.4419	2	72.7581	16.6667	5.06	108.558	18.5185	2.079	136.603	17.2414	6.408	59.839	18.75	3	125	13.1579	3	139.459	16.8539	6.594	103.656	22.3881	1	83.902	20.2703	3.491	98.896	20.5479	6.671	119.314	18.0723	4.389	72.811	17.2414	0	94.432	23.4375	2.294	129.149	19.7368	6.992e-12	65	18.0723
16	17.2043	0	55.478	21.3333	0.242	82.502	18.6047	2	66.7869	17.7778	5	98.705	19.7531	2.017	126.141	18.3908	5.21	64.429	20	2.4	122.8	14.0351	3.086	132.441	17.9775	6.92	101.251	23.8806	1	87.335	21.6216	3.657	96.787	21.9178	6.315	114.938	19.2771	5.208	70.227	18.3908	0.659	97.448	25	1.294	130.661	21.0526	0.12	66.64	19.2771
17	18.2796	0	55.548	22.6667	0	82.596	19.7674	2.009	62.0206	18.8889	4.119	93.272	20.9877	1.287	113.251	19.5402	3.045	69.244	21.25	2	118.8	14.9123	3	124.401	19.1011	7.072	102.712	25.3731	0.749	92.354	22.973	4.377	95.439	23.2877	4.434	105.908	20.4819	6.096	69.661	19.5402	1.935	102.77	26.5625	0.412	126.848	22.3684	0	67.12	20.4819
18	19.3548	0	56.681	24	0	82.433	20.9302	2.668	63.7316	20	3.148	89.543	22.2222	0.641	104.927	20.6897	2.026	72.653	22.5	2.4	112	15.7895	3	111.881	20.2247	8.671	103.665	26.8657	0.014	94.187	24.3243	4.969	91.704	24.6575	2.498	97.213	21.6867	6.984	72.927	20.6897	4.113	108.146	28.125	0	124.149	23.6842	0	70.6	21.6867
19	20.4301	0	56.568	25.3333	0	82.855	22.093	2.738	66.2803	21.1111	2.261	90.009	23.4568	0.739	106.99	21.8391	1.289	73.495	23.75	3.4	108.2	16.6667	3	102.779	21.3483	11.089	104.065	28.3582	0	94.324	25.6757	5.394	95.471	26.0274	0.898	90.09	22.8916	7	77.359	21.8391	5.395	105.221	29.6875	0	122.886	25	0	73.28	22.8916
20	21.5054	0	58.065	26.6667	0	88.998	23.2558	3	69.7573	22.2222	2	97.862	24.6914	1.005	115.79	22.9885	1	74.337	25	5	112	17.5439	3	96.419	22.4719	13.962	103.452	29.8507	0	100.447	27.027	6.586	98.808	27.3973	0.582	88.066	24.0964	6.606	82.614	22.9885	4.635	99.987	31.25	0	120.436	26.3158	4.547e-13	79	24.0964
21	22.5806	0	59.923	28	0	89.997	24.4186	3	74.7014	23.3333	2	108.415	25.9259	1.999	119.388	24.1379	1.652	73.751	26.25	8	117.16	18.4211	3	88.621	23.5955	12.82	106.009	31.3433	0	112.992	28.3784	8.367	102.693	28.7671	0.415	96.081	25.3012	5.464	87.674	24.1379	2.327	91.835	32.8125	0	120.927	27.6316	1.08	83.56	25.3012
22	23.6559	0	58.659	29.3333	0	82.92	25.5814	3	75.1329	24.4444	2	115.402	27.1605	4.15	117.421	25.2874	3.008	74.136	27.5	10.2	121.8	19.2982	3	86.349	24.7191	10.216	108.136	32.8358	0	122.774	29.7297	8.346	104.563	30.137	1	98.593	26.506	4.41	86.489	25.2874	0.525	82.095	34.375	0	123	28.9474	3.44	89.56	26.506
23	24.7312	0.58	57.689	30.6667	0	79.925	26.7442	2.807	70.2812	25.5556	2	121.976	28.3951	6.125	115.135	26.4368	3.97	73.35	28.75	10.2	125.84	20.1754	3	86.602	25.8427	7.904	109.591	34.3284	0	127.207	31.0811	8.097	111.973	31.5068	1	95.124	27.7108	3.756	81.862	26.4368	0	77.702	35.9375	0	133	30.2632	6.6	90.4	27.7108
24	25.8065	0.335	57.465	32	0	82.521	27.907	2	71.2964	26.6667	2	125.772	29.6296	8.428	117.923	27.5862	5.676	76.475	30	8.6	137.84	21.0526	3	92.155	26.9663	7.054	113.866	35.8209	0	127.396	32.4324	8.007	115.742	32.8767	0.95	84.802	28.9157	3.3	83.539	27.5862	0	77.236	37.5	0	144	31.5789	9.48	87.24	28.9157
25	26.8817	0.956	58.607	33.3333	0	88.604	29.0698	2	74.251	27.7778	2.517	128.323	30.8642	11.139	123.27	28.7356	7.43	72.241	31.25	7	147	21.9298	3	97.39	28.0899	5.382	119.818	37.3134	0	131.738	33.7838	9.019	115.22	34.2466	0.001	82.003	30.1205	3.704	83.209	28.7356	0	79.06	39.0625	0	148	32.8947	8	88	30.1205
26	27.957	2.571	61.283	34.6667	0	101.071	30.2326	2.846	74.2295	28.8889	3.96	130.718	32.0988	11.903	124.328	29.8851	7.833	66.712	32.5	4.6	137.56	22.807	3.291	104.707	29.2135	5.123	119.092	38.806	0	132.632	35.1351	10.835	109.394	35.6164	0	81.684	31.3253	4.132	82.271	29.8851	0	81.553	40.625	0	153	34.2105	5.36	88.24	31.3253
27	29.0323	3.141	59.998	36	0	114.421	31.3953	4.536	75.7321	30	6.095	129.203	33.3333	10.735	122.096	31.0345	6.325	64.524	33.75	3.12	131.44	23.6842	3.695	106.693	30.3371	5.536	114.873	40.2985	0	124.222	36.4865	13.103	107.731	36.9863	0	84.293	32.5301	4.56	83.303	31.0345	0	82.969	42.1875	0	156	35.5263	2.68	89.04	32.5301
28	30.1075	2.918	54.79	37.3333	0	122.449	32.5581	6.633	75.6763	31.1111	7.339	125.789	34.5679	8.174	120.191	32.1839	5.46	66.507	35	3.2	133.4	24.5614	4.315	99.69	31.4607	6.195	112.77	41.791	0	116.287	37.8378	17.83	103.974	38.3562	0	90.686	33.7349	4.124	79.441	32.1839	0	86.772	43.75	0	153	36.8421	0.6	87.4	33.7349
29	31.1828	1.596	57.3	38.6667	0	128.303	33.7209	7.243	72.9506	32.2222	7.393	125.911	35.8025	5.594	109.922	33.3333	5.572	71.328	36.25	3.52	141.72	25.4386	4.349	95.474	32.5843	6.971	115.607	43.2836	0	106.998	39.1892	24.017	97.884	39.726	0	92.319	34.9398	3.165	77.501	33.3333	0	92.841	45.3125	0	143	38.1579	0	86.64	34.9398
30	32.2581	0.327	60.462	40	0	128.4	34.8837	6.215	68.3713	33.3333	7.044	126.23	37.037	3.291	102.473	34.4828	5.884	77.21	37.5	3	147	26.3158	4.001	94.998	33.7079	7.343	114.034	44.7761	0	102.11	40.5405	35.954	93.398	41.0959	0	90.977	36.1446	3	81.882	34.4828	0	94.382	46.875	0	133	39.4737	0	89	36.1446
31	33.3333	0	63.393	41.3333	0	121.302	36.0465	4.158	66.8815	34.4444	7.111	133.035	38.2716	2.22	107.694	35.6322	6	83.661	38.75	4	135	27.193	3.372	89.538	34.8315	7	116.996	46.2687	0	102.144	41.8919	59.12	91.746	42.4658	0	91.342	37.3494	3.39	88.664	35.6322	0	95.905	48.4375	0	122	40.7895	0	91.4	37.3494
32	34.4086	0	66.986	42.6667	0	112.869	37.2093	2.848	67.6084	35.5556	6.576	143.781	39.5062	2.913	114.143	36.7816	5.903	94.581	40	5	128.92	28.0702	3.114	80.701	35.9551	6.584	117.05	47.7612	0	99.829	43.2432	98.169	88.433	43.8356	0	92.273	38.5542	4.846	94.092	36.7816	0	97.673	50	0	114	42.1053	0.12	92.36	38.5542
33	35.4839	0	67.683	44	0	105.745	38.3721	1.964	70.2948	36.6667	6.221	149.312	40.7407	3.726	118.904	37.931	5.247	103.393	41.25	6.4	127.24	28.9474	3	81.113	37.0787	7.049	114.344	49.2537	0.055	96.575	44.5946	135.966	82.762	45.2055	0	94.027	39.759	7.087	99.785	37.931	0	95.777	51.5625	0	119	43.4211	1.2	89.92	39.759
34	36.5591	0	69.325	45.3333	0	94.931	39.5349	1.079	69.3613	37.7778	6.816	155.356	41.9753	5.282	121.84	39.0805	5	107.829	42.5	9.64	127.28	29.8246	3.245	90.133	38.2022	7.204	112.874	50.7463	0.613	94.055	45.9459	170.678	84.773	46.5753	0.537	96.919	40.9639	10.524	101.937	39.0805	0	94.613	53.125	0	121	44.7368	2.88	87	40.9639
35	37.6344	0	70.942	46.6667	0	83.23	40.6977	1	68.6025	38.8889	5.988	149.043	43.2099	5.956	120.975	40.2299	5	112.238	43.75	17	129	30.7018	4.183	102.262	39.3258	6.661	117.144	52.2388	2.532	89.818	47.2973	204.394	88.768	47.9452	3.021	93.626	42.1687	15.334	101.187	40.2299	0	92.495	54.6875	1	118	46.0526	6	81	42.1687
36	38.7097	0	71.853	48	0	75.362	41.8605	1	70.8273	40	5.911	144.984	44.4444	5.308	117.891	41.3793	6.094	107.124	45	30.8	127.12	31.5789	5	124.985	40.4494	5.999	123.534	53.7313	7.531	82.797	48.6486	222.4	89.81	49.3151	10.216	87.061	43.3735	19.945	95.709	41.3793	0	89.413	56.25	3.562	119.178	47.3684	12.16	72.96	43.3735
37	39.7849	0	73.735	49.3333	0	73.038	43.0233	0.552	72.7918	41.1111	5.639	140.592	45.679	4.224	108.341	42.5287	8.076	96.046	46.25	49.96	120.28	32.4561	4.975	148.775	41.573	5.189	122.325	55.2239	23.232	76.306	50	208.319	93.371	50.6849	28.828	84.411	44.5783	28.698	89.072	42.5287	0	87.937	57.8125	12.425	116.57	48.6842	20.32	69.4	44.5783
38	40.8602	0	74.95	50.6667	0	76.928	44.186	0.372	73.3422	42.2222	8.709	136.031	46.9136	2.854	96.666	43.6782	10.036	84.876	47.5	81.72	109.68	33.3333	4.227	151.102	42.6966	5.801	117.79	56.7164	64.7	72.151	51.3514	161.31	100.928	52.0548	70.882	83.041	45.7831	37.009	80.345	43.6782	0	88.226	59.375	29.611	116.168	50	35.16	69.32	45.7831
39	41.9355	0	72.753	52	3.024	81.286	45.3488	0.443	74.283	43.3333	16	132	48.1481	1.336	94.116	44.8276	14.256	80.249	48.75	125.8	101.92	34.2105	2.942	143.067	43.8202	6.735	113.713	58.209	128.216	70.242	52.7027	99.918	107.565	53.4247	139.225	84.761	46.988	50.745	77.309	44.8276	0.691	88.266	60.9375	65.683	119.168	51.3158	66.68	72.72	46.988
40	43.0108	0	68.452	53.3333	17.367	82.461	46.5116	1	76.1953	44.4444	31.811	130.784	49.3827	1.056	95.896	45.977	24.463	82.26	50	169	102	35.0877	1.657	138.242	44.9438	8.433	119.626	59.7015	187.196	76.076	54.0541	54.398	108.111	54.7945	204.195	94.723	48.1928	69.316	75.661	45.977	6.712	90.449	62.5	124.379	124.942	52.6316	121	82	48.1928
41	44.086	0	64.627	54.6667	49.261	81.391	47.6744	1.223	77.9423	45.5556	52.439	120.845	50.6173	1.824	94.279	47.1264	42.262	85.58	51.25	203.12	102.24	35.9649	1.035	132.159	46.0674	13.405	120.075	61.194	213.242	86.117	55.4054	31.505	105.403	56.1644	233.424	102.38	49.3976	90.603	75.181	47.1264	27.292	91.036	64.0625	183.757	127.142	53.9474	172.96	91.4	49.3976
42	45.1613	0	59.396	56	89.182	79.899	48.8372	2.992	79.1001	46.6667	70.645	112.025	51.8519	4.36	87.257	48.2759	57.945	83.605	52.5	220.68	111.24	36.8421	0.253	118.464	47.191	27.019	122.272	62.6866	212.387	96.946	56.7568	17.131	97.88	57.5342	228.904	104.839	50.6024	110.12	73.207	48.2759	62.018	89.067	65.625	217.673	133.075	55.2632	214.72	99.68	50.6024
43	46.2366	0	54.352	57.3333	121.973	79.088	50	5.679	75.4903	47.7778	79.444	106.5	53.0864	9.325	85.93	49.4253	64.499	78.002	53.75	224	121.96	37.7193	0	103.79	48.3146	41.281	127.917	64.1791	176.669	99.65	58.1081	8.282	97.257	58.9041	200.287	104.73	51.8072	125.368	69.694	49.4253	96.586	83.289	67.1875	209.776	137.653	56.5789	226.52	110.28	51.8072
44	47.3118	0.226	55.739	58.6667	147.573	79.375	51.1628	12.679	66.0154	48.8889	76.448	102.714	54.321	18.907	84.906	50.5747	62.983	72.677	55	203.04	129.76	38.5965	0	98.551	49.4382	50.558	128.746	65.6716	125.695	94.436	59.4595	2.46	105.274	60.274	162.164	101.276	53.012	141.371	71.256	50.5747	121.134	79.272	68.75	170.419	136.836	57.8947	191	113.8	53.012
45	48.3871	4.352	54.524	60	167.316	81.986	52.3256	31.487	57.5391	50	72.803	104.684	55.5556	37.351	82.297	51.7241	62.506	67.608	56.25	160	128	39.4737	0	99.927	50.5618	47.766	118.749	67.1642	80.823	94.136	60.8108	0.305	111.582	61.6438	135.686	94.136	54.2169	161.434	71.993	51.7241	140.335	80.954	70.3125	124.496	136.867	59.2105	153	109	54.2169
46	49.4624	21.422	52.105	61.3333	181.695	83.354	53.4884	64.81	49.9565	51.1111	82.416	110.051	56.7901	65.975	77.211	52.8736	74.756	63.69	57.5	112.84	118.52	40.3509	0	104.309	51.6854	39.399	108.562	68.6567	45.083	95.669	62.1622	0	117.701	63.0137	96.722	85.81	55.4217	183.064	73.801	52.8736	158.764	87.045	71.875	80.577	139.666	60.5263	118.08	109.92	55.4217
47	50.5376	58.1	51.848	62.6667	185.981	83.687	54.6512	101.967	47.1637	52.2222	110.959	102.363	58.0247	95.997	77.149	54.023	96.984	61.107	58.75	82.24	108.48	41.2281	0	113.5	52.809	39.091	101.835	70.1493	23.908	98.369	63.5135	0	121.809	64.3836	53.527	83.727	56.6265	182.531	76.658	54.023	166.57	97.492	73.4375	46.656	139.235	61.8421	95.32	107.8	56.6265
48	51.6129	113.924	52.109	64	168.625	85.821	55.814	130.054	48.8666	53.3333	143.591	95.494	59.2593	122.21	79.378	55.1724	118.982	58.867	60	58.12	102.88	42.1053	0	124.793	53.9326	54.402	100.602	71.6418	14.43	96.348	64.8649	0	113.905	65.7534	19.686	79.359	57.8313	150.255	77.516	55.1724	128.732	108.581	75	30.615	137.434	63.1579	75.12	105.6	57.8313
49	52.6882	165.502	51.287	65.3333	128.521	92.26	56.9767	140.571	50.5558	54.4444	182.658	100.776	60.4938	130.917	84.028	56.3218	137.45	61.134	61.25	36.16	104.4	42.9825	0	131.315	55.0562	88.053	98.8264	73.1343	9.284	90.506	66.2162	0	106.114	67.1233	3.468	76.087	59.0361	95.04	71.472	56.3218	67.229	114.898	76.5625	22.567	136.32	64.4737	63.96	103.88	59.0361
50	53.7634	181.063	52.37	66.6667	76.817	105.107	58.1395	139.933	54.7419	55.5556	196.804	106.505	61.7284	117.845	90.652	57.4713	143.084	67.46	62.5	17	113	43.8596	0	130.048	56.1798	128.497	99.1612	74.6269	5.94	89.613	67.5676	0	99.628	68.4932	0.157	72.738	60.241	46.14	65.641	57.4713	28.03	119.161	78.125	17.901	131.194	65.7895	58	103	60.241
51	54.8387	175.023	52.44	68	33.599	120.01	59.3023	131.089	61.3134	56.6667	155.992	111.895	62.963	98.635	95.373	58.6207	127.476	72.144	63.75	7.64	133.44	44.7368	0	123.065	57.3034	158.325	101.289	76.1194	4.975	89.878	68.9189	0	93.822	69.863	0	74.116	61.4458	17.159	63.148	58.6207	7.927	123.196	79.6875	14.66	126.1	67.1053	46.12	98.68	61.4458
52	55.914	173.543	55.027	69.3333	11.455	129.571	60.4651	122.479	62.5314	57.7778	95.662	120.121	64.1975	76.669	98.392	59.7701	93.609	77.038	65	3.12	147	45.614	0	112.643	58.427	162.695	101.811	77.6119	4.196	87.098	70.2703	0	92.047	71.2329	0	80.902	62.6506	4.071	63.068	59.7701	1.113	128.167	81.25	11.66	119.54	68.4211	36.92	100.2	62.6506
53	56.9892	185.808	61.787	70.6667	4.708	128.303	61.6279	109.09	64.8239	58.8889	43.867	125.623	65.4321	54.998	98.345	60.9195	57.812	84.253	66.25	2.2	151.2	46.4912	0	101.331	59.5506	137.685	106.334	79.1045	4	92.005	71.6216	0	95.332	72.6027	0	87.039	63.8554	0.588	65.802	60.9195	0	128.653	82.8125	8.66	115.66	69.7368	31.16	107.76	63.8554
54	58.0645	194.783	68.393	72	3.797	120.204	62.7907	85.352	66.4445	60	14.978	123.464	66.6667	40.656	93.508	62.069	32.671	92.811	67.5	2	150.2	47.3684	0	93.206	60.6742	101.514	110.895	80.597	3.803	95.327	72.973	0	96.777	73.9726	0	94.571	65.0602	0.008	73.126	62.069	0	117.263	84.375	6.44	115	71.0526	32	113.84	65.0602
55	59.1398	164.774	72.673	73.3333	4.487	109.871	63.9535	57.966	65.8124	61.1111	3.563	121.549	67.9012	28.876	87.436	63.2184	15.455	98.113	68.75	2	151	48.2456	0	87.587	61.7978	71.788	111.97	82.0896	4.57	101.906	74.3243	0	97.183	75.3425	0	89.779	66.2651	0	81.01	63.2184	0	107.393	85.9375	6	113.44	72.3684	33	115	66.2651
56	60.2151	85.007	74.97	74.6667	7.329	100.214	65.1163	33.454	66.8463	62.2222	0.056	119.552	69.1358	18.739	84.052	64.3678	5.133	95.404	70	2	145.68	49.1228	0	85.111	62.9213	50.968	112.799	83.5821	4.967	109.927	75.6757	0	100.824	76.7123	0	83.919	67.4699	0	87.84	64.3678	0	102.573	87.5	7.56	113.78	73.6842	38.24	119.08	67.4699
57	61.2903	25.404	76.658	76	10.749	94.139	66.2791	15.295	68.9659	63.3333	0	116.702	70.3704	11.106	81.425	65.5172	1.211	90.105	71.25	1.8	143.52	50	0	84.774	64.0449	35.525	116.262	85.0746	5.924	117.013	77.027	0	108.627	78.0822	0	86.649	68.6747	0	93.551	65.5172	0	101.185	89.0625	8.78	114.78	75	47.2	125.48	68.6747
58	62.3656	5.438	76.038	77.3333	14.443	95.759	67.4419	5.354	71.6216	64.4444	0	121.434	71.6049	7.767	82.166	66.6667	0.329	89.06	72.5	1.2	140.88	50.8772	0.585	86.881	65.1685	20.753	123.305	86.5672	6	120.625	78.3784	0.71	116.925	79.4521	0	90.106	69.8795	0	96.328	66.6667	0.013	103.414	90.625	9	120.46	76.3158	52.8	130.48	69.8795
59	63.4409	0.556	73.222	78.6667	14.09	107.17	68.6047	0.992	68.0163	65.5556	0	130.481	72.8395	5.005	82.389	67.8161	0	90.999	73.75	1.2	138.24	51.7544	4.496	92.484	66.2921	10.148	126.461	88.0597	6	130.107	79.7297	1.641	123.812	80.8219	0.693	87.208	71.0843	0	92.965	67.8161	0.589	108.108	92.1875	7.44	129.8	77.6316	48.36	129.28	71.0843
60	64.5161	0	69.974	80	12.95	118.979	69.7674	0.008	65.2649	66.6667	0	133.002	74.0741	1.966	84.604	68.9655	0	91.389	75	2	136	52.6316	13.469	102.193	67.4157	5.625	133.643	89.5522	6.802	132.684	81.0811	1.304	124.161	82.1918	0.242	80.854	72.2892	0	82.509	68.9655	0	114.633	93.75	6.22	129.66	78.9474	31	126	72.2892
61	65.5914	0	69.167	81.3333	14.453	124.402	70.9302	0	61.9918	67.7778	0	119.933	75.3086	0	80.694	70.1149	0	92.29	76.25	4.201	129.214	53.5088	29.003	114.475	68.5393	2.653	139.027	91.0448	6.249	133.689	82.4324	0.953	123.847	83.5616	0	77.421	73.494	0	75.392	70.1149	0	116.941	95.3125	5.22	129	80.2632	16.002	126.564	73.494
62	66.6667	0	69.738	82.6667	16.15	128.173	72.093	0	59.2895	68.8889	0	107.267	76.5432	0	73.482	71.2644	0	89.583	77.5	5.619	125.803	54.386	55.587	120.217	69.6629	1.424	139.688	92.5373	5.463	137.196	83.7838	1	128.274	84.9315	0	77.832	74.6988	0	76.827	71.2644	0	117.913	96.875	4.22	132.12	81.5789	7.262	119.897	74.6988
63	67.7419	0	71.341	84	17.222	127.031	73.2558	0	57.3366	70	0	98.432	77.7778	0	69.405	72.4138	0	84.505	78.75	14.01	124.76	55.2632	93.93	115.078	70.7865	0.215	136.447	94.0299	4.545	144.287	85.1351	1	129.101	86.3014	0	83.804	75.9036	0	79.888	72.4138	0	109.274	98.4375	3.22	132.22	82.8947	3.769	116.503	75.9036
64	68.8172	0	73.424	85.3333	17.493	121.286	74.4186	0	55.0335	71.1111	0	95.716	79.0123	0	69.376	73.5632	0	84.031	80	19.844	128.248	56.1404	136.516	106.189	71.9101	0	131.302	95.5224	5.114	157.323	86.4865	1	127.927	87.6712	0	90.618	77.1084	0	73.94	73.5632	0	101.426	100	3	135.12	84.2105	1.751	123.665	77.1084
65	69.8925	0	71.191	86.6667	18.237	116.348	75.5814	0	52.7791	72.2222	0	92.11	80.2469	0	74.74	74.7126	0	86.191	81.25	15.911	131.272	57.0175	169.552	100.915	73.0337	0	119.203	97.0149	7.092	169.152	87.8378	1	125.678	89.0411	0	94.743	78.3133	0	73.562	74.7126	0	93.783				85.5263	0.469	130.902	78.3133
66	70.9677	0	66.308	88	24.859	116.928	76.7442	0	52.1868	73.3333	0	91.846	81.4815	0	80.027	75.8621	0	88.018	82.5	10.147	126.833	57.8947	186.691	99.862	74.1573	0	109.605	98.5075	8.493	166.061	89.1892	1	123.847	90.411	0.367	92.565	79.5181	0	75.634	75.8621	0	88.669				86.8421	0	135.159	79.5181
67	72.043	0	64.061	89.3333	37.482	126.322	77.907	0	54.1882	74.4444	0	91.687	82.716	0	86.843	77.0115	0	88.479	83.75	5.62	122.297	58.7719	184.83	100.867	75.2809	0	100.789	100	9.186	150.98	90.5405	1	123.224	91.7808	2.002	91.05	80.7229	0	80.995	77.0115	0	90.997				88.1579	0	141.224	80.7229
68	73.1183	0	64.231	90.6667	50.756	141.844	79.0698	0	54.8325	75.5556	0	92.553	83.9506	0	90.199	78.1609	0	88.992	85	4.832	121.254	59.6491	169.6	101.836	76.4045	0	96.7825				91.8919	1	126.197	93.1507	4.981	92.389	81.9277	0	91.319	78.1609	0	91.996				89.4737	0	140.91	81.9277
69	74.1935	0	67.398	92	48.894	159.748	80.2326	0	54.0554	76.6667	0	96.263	85.1852	0.147	94.601	79.3103	0.212	90.791	86.25	5.769	122.366	60.5263	153.335	100.871	77.5281	0	98.7953				93.2432	1.661	126.396	94.5205	9.268	91.748	83.1325	0	99.607	79.3103	0	94.717				90.7895	0	147.64	83.1325
70	75.2688	0	70.133	93.3333	31.99	168.276	81.3953	0	55.658	77.7778	0	95.612	86.4198	0.866	96.861	80.4598	1.161	92.138	87.5	5.571	122.418	61.4035	131.298	100.286	78.6517	0	107.994				94.5946	1.9	128.211	95.8904	12.309	88.729	84.3373	0.091	97.049	80.4598	0	93.011				92.1053	0	156.952	84.3373
71	76.3441	0	71.523	94.6667	16.902	177.217	82.5581	0	58.5522	78.8889	0.127	96.602	87.6543	1.474	100.067	81.6092	1.95	90.063	88.75	4.675	123.047	62.2807	90.611	98.845	79.7753	0	117.24				95.9459	2.212	131.065	97.2603	9.94	86.677	85.5422	1.116	91.32	81.6092	0	93.993				93.4211	0	165.048	85.5422
72	77.4194	0	72.178	96	8.492	184.348	83.7209	0	60.9073	80	1.103	97.924	88.8889	1.961	99.425	82.7586	1.776	84.036	90	6.039	131.766	63.1579	51.366	98.393	80.8989	0	128.483				97.2973	1.981	133.099	98.6301	6.002	90.435	86.747	2.461	88.77	82.7586	0	89.194				94.7368	0	160.565	86.747
73	78.4946	0	70.77	97.3333	5.495	194.47	84.8837	0.267	61.5194	81.1111	1.663	95.732	90.1235	2.806	100.561	83.908	1.602	78.418	91.25	6.848	141.773	64.0351	27.91	100.393	82.0225	0.191	136.576				98.6486	2	135.022	100	2.882	90.706	87.9518	2.998	87.957	83.908	0	80.125				96.0526	0	153.65	87.9518
74	79.5699	0	67.74	98.6667	4.525	191.867	86.0465	0.913	60.3267	82.2222	1.906	88.188	91.358	3.773	105.949	85.0575	1.428	71.451	92.5	5.189	151.42	64.9123	14.733	104.498	83.1461	1.304	137.649				100	1.198	136.032				89.1566	2.108	91.904	85.0575	0	78.227				97.3684	0	148.936	89.1566
75	80.6452	0	66.42	100	3.622	175.743	87.2093	1.188	58.2094	83.3333	1.556	80.023	92.5926	4.344	110.325	86.2069	1.312	66.497	93.75	4.211	155.799	65.7895	8.53	112.938	84.2697	1.904	137.414										90.3614	1.375	100.882	86.2069	0	82.525				98.6842	0.203	140.89	90.3614
76	81.7204	0	65.74				88.3721	1.18	56.6089	84.4444	1.171	79.688	93.8272	6.468	110.094	87.3563	1.354	64.854	95	4.537	148.63	66.6667	5.286	119.003	85.3933	1.667	139.36										91.5663	1	110.686	87.3563	0	83.716				100	1.265	132.595	91.5663
77	82.7957	0	64				89.5349	1.963	56.0952	85.5556	1	85.795	95.0617	9.155	111.967	88.5057	1.907	68.58	96.25	4.802	147.524	67.5439	3.996	123.263	86.5169	1.577	143.804										92.7711	1	116.378	88.5057	0	87.896							92.7711
78	83.871	0	66.1				90.6977	1.916	59.8399	86.6667	1	93.52	96.2963	13.495	114.687	89.6552	1.781	77.655	97.5	4.419	156.972	68.4211	4.083	122.35	87.6404	1.785	153.025										93.9759	1	126.14	89.6552	0	98.064							93.9759
79	84.9462	0	69				91.8605	1.136	66.7484	87.7778	1.118	92.139	97.5309	19.374	115.83	90.8046	2.164	86.774	98.75	3.627	160.629	69.2982	5.321	112.167	88.764	2	163.96										95.1807	1.564	134.346	90.8046	0.711	113.304							95.1807
80	86.0215	0	69.84				93.0233	1	73.1212	88.8889	1.361	84.505	98.7654	24.676	119.317	91.954	3.149	89.565	100	3.342	157.775	70.1754	7.439	103.011	89.8876	2	178.095										96.3855	2.164	148.128	91.954	0.798	121.167							96.3855
81	87.0968	0	71.84				94.186	0.732	76.2682	90	1.603	79.527	100	26.054	124.935	93.1034	4.239	87.819				71.0526	8.346	98.437	91.0112	4.343	176.796										97.5904	2.495	159.879	93.1034	0.865	129.337							97.5904
82	88.172	0	74.26				95.3488	0.4	79.4712	91.1111	1.846	78.649				94.2529	6.076	84.132				71.9298	7.058	100.777	92.1348	7.087	172.601										98.7952	2.309	156.789	94.2529	0.931	134.755							98.7952
83	89.2473	0	78.1				96.5116	0.992	88.1297	92.2222	2.057	83.453				95.4023	7	82.227				72.807	5.118	110.046	93.2584	8.723	157.802										100	2.046	140.065	95.4023	0.036	147.511							100
84	90.3226	0	81.42				97.6744	1	92.1047	93.3333	1.786	92.707				96.5517	6.912	82.416				73.6842	4.731	120.688	94.382	9.176	145.081													96.5517	0.057	153.237
85	91.3978	0	81.16				98.8372	1	92.822	94.4444	0.978	99.605				97.7011	5.963	83.276				74.5614	5	126.405	95.5056	6.774	145.577													97.7011	0.762	160.252
86	92.4731	0	82.1				100	1.399	88.867	95.5556	0.601	105.824				98.8506	5.6	84.304				75.4386	5.243	122.552	96.6292	5.082	143.865													98.8506	0.887	157.738
87	93.5484	0.45	87.896							96.6667	0.059	117.39				100	4.831	87.935				76.3158	5.076	113.218	97.7528	4.191	152.472													100	1	143.297
88	94.6237	1	93.301							97.7778	0.301	133.865										77.193	4.493	107.926	98.8764	4.551	157.17
89	95.6989	1.396	95.624							98.8889	0.544	142.081										78.0702	3.747	108.588	100	4.814	152.079
90	96.7742	2	98.979							100	0.786	139.39										78.9474	2.576	113.725
91	97.8495	1.765	106.426																			79.8246	2	118.479
92	98.9247	1.148	111.019																			80.7018	2.474	115.464
93	100	0.677	109.684																			81.5789	2.986	108.327
94																						82.4561	3	105.546
95																						83.3333	3.396	109.787
96																						84.2105	3.644	116.715
97																						85.0877	3.259	123.395
98																						85.9649	3	126.315
99																						86.8421	3.363	126.281
100																						87.7193	4.377	127.767
101																						88.5965	6.072	129.071
102																						89.4737	9.034	129.434
103																						90.3509	11.039	127.03
104																						91.2281	10.847	120.131
105																						92.1053	8.791	117.155
106																						92.9825	5.982	121.519
107																						93.8596	4.528	126.548
108																						94.7368	3.592	133.146
109																						95.614	3	146.955
110																						96.4912	2.765	170.896
111																						97.3684	2.493	193.813
112																						98.2456	2.381	204.619
113																						99.1228	2.239	200.369
114																						100	2.381	181.391
	0			0			0			0			0			0			0			0			0			0			0			0			0			0			0			0			0
	5	0.6104	159.452	5	1.29525	166.659	5	1	135.738	5	1.071	219.738	5	1	164.663	5	1.2946	157.802	5	2.92	231.36	5	4.36617	166.451	5	4.0602	176.66	5	2.9265	164.212	5	5.50175	238.993	5	2.446	212.49	5	2	182.94	5	2.5818	171.903	5	2.1	189.55	5	3.2	206.78	5
	10	0	136.79	10	1	167.823	10	1.0065	119.039	10	2.6594	182.272	10	1.1065	164.21	10	3.347	127.959	10	2.512	191.92	10	3.99017	147.514	10	4.691	189.628	10	3.46033	174.85	10	3.44575	181.361	10	2.62425	158.448	10	2.14025	168.498	10	1.32525	143.84	10	2.357	151.8	10	1.5	141.44	10
	15	0.47	92.7005	15	0.1905	140.635	15	1	114.705	15	4.0072	125.72	15	1.2505	153.937	15	3.2478	74.4636	15	2.56	141.368	15	3.01433	139.194	15	8.9522	147.725	15	1.19675	143.249	15	3	101.782	15	2.19067	108.344	15	3.93475	100.231	15	0.818	112.34	15	1.75167	123.024	15	4.13	84.97	15
	20	0	59.0046	20	0.995	96.6363	20	1.7018	75.3895	20	4.5132	100.886	20	2.14075	133.304	20	5.3655	63.06	20	3.08	126.096	20	3	97.2098	20	7.43875	103.69	20	0.811	90.2833	20	3.13133	89.4833	20	4.99775	127.458	20	4.90125	72.489	20	0.6485	97.1935	20	1.60333	121.28	20	0.93	67.64	20
	25	0.116	58.1808	25	0.3105	83.4895	25	2.8515	68.6176	25	2.2818	100.246	25	0.918	110.24	25	1.49175	73.559	25	3.04	114.76	25	3.3835	97.8728	25	11.3516	105.066	25	1	84.3813	25	4.1235	95.7065	25	4.9795	109.343	25	6.6715	75.6403	25	4.1175	101.297	25	2.154	125.042	25	0.03	69.41	25
	30	1.75075	59.3383	30	0	86.1925	30	2.45175	72.7404	30	3.3144	127.198	30	5.1755	117.467	30	5.5834	72.5828	30	8.4	122.928	30	3.5135	88.6595	30	6.36575	115.592	30	0.19075	95.328	30	7.17325	100.384	30	0.631667	91.4123	30	4.2325	84.891	30	0.105	79.5292	30	0.4265	126.136	30	1.13	81.35	30
	35	0.9682	60.5862	35	0	88.0302	35	5.4946	73.392	35	6.9964	128.034	35	10.4878	122.471	35	5.81025	69.8923	35	5.304	137.448	35	4.2654	134.038	35	6.609	114.856	35	0	120.991	35	8.37433	114.312	35	0.73775	90.1305	35	3.937	81.145	35	0	89.241	35	0	121.454	35	7.36	88.47	35
	40	0	70.7076	40	0	123.393	40	2.51225	68.5365	40	6.3024	148.495	40	3.5045	108.558	40	5.5375	97.366	40	3.744	137.208	40	0.490833	115.189	40	6.8745	115.353	40	0	130.589	40	16.4462	104.746	40	0	87.2455	40	4.58075	91.1058	40	0	95.992	40	0	141.667	40	0.82	88.02	40
	45	0	70.1955	45	0	117.079	45	0.731	71.391	45	13.614	136.878	45	5.068	119.903	45	8.6924	96.1066	45	13.768	127.912	45	0	121.172	45	6.4314	119.397	45	0	112.404	45	82.3023	89.0847	45	0	91.5307	45	18.6253	96.9762	45	0.1382	89.2674	45	0	154	45	1.05	90.17	45
	50	5.2	55.2232	50	0	81.6402	50	2.2674	76.6022	50	70.3558	109.354	50	2.3675	98.7548	50	47.2922	82.3618	50	91.456	112.2	50	0	94.1087	50	33.0658	124.753	50	0.0183333	99.516	50	201.448	89.1805	50	3.4435	92.9083	50	61.9183	77.124	50	48.152	88.4603	50	0	128	50	18.41	73.17	50
	55	138.722	52.0108	55	17.413	80.5165	55	43.3244	59.233	55	118.485	102.674	55	8.604	88.093	55	74.3072	66.2705	55	203.968	113.44	55	17.19	100.171	55	45.1645	107.437	55	3.55867	88.89	55	130.986	102.494	55	110.782	86.734	55	134.573	71.5375	55	146.701	86.1908	55	0.25	118	55	98.95	78.86	55
	60	179.727	64.47	60	131.511	80.087	60	135.412	53.8694	60	101.461	117.522	60	80.3832	79.0087	60	124.12	67.3286	60	123.248	117.528	60	156.853	104.124	60	135.051	101.484	60	100.836	73.6937	60	14.8445	101.454	60	220.872	103.983	60	152.722	74.8618	60	46.6062	118.801	60	15.1993	117.305	60	196.31	108.19	60
	65	23.281	74.1724	65	175.904	83.712	65	93.7218	64.9031	65	3.7194	120.54	65	106.016	92.1112	65	27.7677	92.6453	65	24.408	120.144	65	78.2088	100.548	65	64.9487	112.981	65	200.766	94.2377	65	0.07625	116.249	65	112.025	91.2372	65	16.9895	64.4148	65	0	113.97	65	124.606	123.751	65	88.12	106.8	65
	70	0	70.9722	70	62.598	111.737	70	11.0206	68.143	70	0	117.823	70	35.8173	90.8353	70	0.385	90.3882	70	2.264	149.016	70	5.4432	117.944	70	8.1206	132.425	70	83.867	94.747	70	0	99.8547	70	5.82775	75.575	70	0.0016	86.371	70	0.1505	106.835	70	199.289	135.855	70	43.05	102.41	70
	75	0	65.4995	75	5.08025	114.648	75	0	58.4128	75	0	93.9582	75	6.461	82.646	75	0	87.32	75	1.64	140.864	75	6.282	109.894	75	0.05375	124.14	75	13.3905	93.709	75	0	95.3347	75	0	87.504	75	0	81.9232	75	0	107.867	75	70.586	138.3	75	37.61	118.35	75
	80	0	70.4688	80	13.058	104.012	80	0	53.4967	80	0.246	95.7908	80	0	73.2392	80	0.053	89.07	80	9.1348	128.805	80	3.85583	114.081	80	0	104.32	80	4.39033	89.6603	80	0.58775	112.547	80	0	87.6132	80	0	75.756	80	0	91.5947	80	21.4357	132.762	80	44.84	127.81	80
	85	0	66.252	85	15.1937	124.646	85	0.0534	58.1385	85	1.4798	88.311	85	0	82.9523	85	1.62225	86.1638	85	11.2708	125.981	85	3.1	111.168	85	0.84975	135.03	85	4.44667	102.387	85	1.08567	125.427	85	0.23375	80.8287	85	0.02275	92.2425	85	0	89.0807	85	8.92	116.733	85	7.196	121.657	85
	90	0	73.51	90	24.5177	120.221	90	1.311	57.8101	90	1.2164	87.0972	90	1.112	97.7385	90	1.5564	69.8074	90	5.3772	124.17	90	4.85083	127.044	90	1.8058	155.649	90	6.1815	125.107	90	1	126.638	90	0	89.7217	90	2.17075	89.9877	90	0	86.0856	90	7.44667	114	90	0.11725	137.049	90
	95	0.29	85.1754	95	37.1355	161.771	95	1.196	68.9944	95	1.654	86.7882	95	4.34775	106.732	95	3.907	87.0725	95	5.3648	145.878	95	7.46317	124.255	95	7.33225	163.07	95	5.419	138.391	95	1.39025	126.007	95	4.1545	91.938	95	1.09375	113.522	95	0.82625	124.641	95	7.55333	126.64	95	0	157.551	95
	100	1.3972	104.346	100	5.5335	186.607	100	0.9582	88.2789	100	0.4582	127.71	100	18.5508	117.347	100	6.0612	84.0316	100	4.1454	154.306	100	2.54317	183.007	100	5.0824	150.233	100	7.47125	160.879	100	1.84775	133.804	100	7.78325	89.1368	100	2.1156	147.841	100	0.5484	152.407	100	3.915	132.115	100	0.367	144.018	100
[truncated: 59 more columns]

## Sheet: Summary
	FISH	PI	FISH	PI	FISH	PI
	Mean	Mean	STDDEV	STDDEV	SEM	SEM
5	3.04043	186.149	1.76275	31.4995	0.30231	5.40212
10	2.62043	160.596	1.73572	26.5454	0.297674	4.5525
15	3.24868	118.769	2.06234	24.4802	0.353688	4.19832
20	3.63631	95.2467	2.73115	20.6519	0.468388	3.54177
25	3.67887	91.8806	2.96795	18.0031	0.508998	3.08751
30	4.98131	96.6507	7.20651	19.6143	1.23591	3.36383
35	4.69805	99.6493	6.03207	21.5521	1.03449	3.69616
40	3.40339	103.827	3.97231	21.4142	0.681246	3.67251
45	11.1041	104.474	19.3381	21.0299	3.31646	3.6066
50	45.4155	92.788	53.4992	18.1381	9.17505	3.11066
55	92.0574	86.386	59.3604	19.2318	10.1802	3.29823
60	105.906	93.0352	55.6839	21.4077	9.54971	3.67139
65	53.3121	99.7111	56.5968	20.484	9.70628	3.51298
70	17.0266	101.284	37.0263	22.0344	6.34996	3.77887
75	7.77556	98.2536	14.7102	20.7305	2.52277	3.55526
80	5.45861	98.9451	8.90231	21.1182	1.52673	3.62174
85	3.83425	102.421	4.98061	25.021	0.854168	4.29106
90	3.78973	108.596	4.69391	26.5516	0.805	4.55356
95	5.39817	119.599	7.64051	27.8815	1.31034	4.78163
100	4.17798	134.347	4.17961	32.8324	0.716798	5.63071
