# Supplementary material for: Large domains of heterochromatin direct the formation of short mitotic chromosome loops
Source: eLife. 2020 Sep 11;9:e57212. doi: 10.7554/eLife.57212 (PMC7515631; doi:10.7554/eLife.57212)
Supplement: Figure 5—source data 4. [file elife-57212-fig5-data4.xlsx]

## Sheet: All Data
1	FISH		IF	3	FISH		IF	4	FISH		IF	5	FISH		IF	6	FISH		IF	7	FISH		IF	8	FISH		IF	9	FISH		IF	10	FISH		IF	11	FISH		IF	12	FISH		IF	13	FISH		IF	14	FISH
X	Y	X	Y	X	Y	X	Y	X	Y	X	Y	X	Y	X	Y	X	Y	X	Y	X	Y	X	Y	X	Y	X	Y	X	Y	X	Y	X	Y	X	Y	X	Y	X	Y	X	Y	X	Y	X	Y	X	Y	X	Y
0	2	0	198	0	9	0	162	0	2	0	132	0	1	0	181	0	7	0	203	0	1	0	189	0	1	0	209	0	1	0	220	0	4	0	178	0	1	0	216	0	2	0	219	0	5	0	183	0	3
1	1.999	1	193.639	1	10.184	1	158.839	1	4.088	1	142.614	1	1.4961	1	193.221	1	11.952	1	200.003	1	1.719	1	192.108	1	1.279	1	215.143	1	1	1	214.118	1	2.403	1	185.306	1	1	1	222.004	1	2	1	207.483	1	3.861	1	189.278	1	2.01
2	1.018	2	187.832	2	8.093	2	147.206	2	5.334	2	141.97	2	1.9923	2	200.161	2	17.902	2	192.493	2	2.267	2	193.397	2	1.582	2	209.438	2	1	2	207.831	2	1.168	2	182.399	2	1	2	214.989	2	1.115	2	188.114	2	3.425	2	189.745	2	1.723
3	1	3	180.788	3	4.233	3	129.838	3	5.776	3	142.421	3	1.8837	3	201.153	3	22.596	3	185.15	3	2	3	192.986	3	1.114	3	202.288	3	1	3	207.565	3	1	3	173.005	3	1	3	219.027	3	1	3	169.74	3	3	3	179.528	3	1.576
4	1	4	170.878	4	1.432	4	114.397	4	6.287	4	140.345	4	1.5189	4	200.001	4	17.671	4	180.712	4	2	4	188.649	4	1.719	4	187.55	4	1.312	4	188.689	4	1.584	4	158.23	4	1	4	214.731	4	0.74	4	149.762	4	3	4	157.48	4	1.434
5	1	5	163.968	5	0.117	5	100.361	5	6.89	5	139.258	5	1.3167	5	204.125	5	9.04	5	175.892	5	1.213	5	178.676	5	1.544	5	169.165	5	3.022	5	164.967	5	2.906	5	139.198	5	1.92	5	214.049	5	0.094	5	131.977	5	3.154	5	124.982	5	2.243
6	1	6	154.286	6	0	6	90.4774	6	7.686	6	137.649	6	1	6	202.096	6	4.028	6	165.279	6	1.367	6	162.265	6	1.253	6	148.978	6	5.145	6	137.311	6	3.174	6	118.827	6	3.979	6	203.55	6	0	6	117.051	6	4.107	6	97.897	6	3.234
7	1.07	7	147.183	7	0	7	84.5612	7	8.071	7	136.125	7	1	7	185.301	7	2.013	7	151.093	7	2.922	7	150.671	7	1	7	132.773	7	8.522	7	113.657	7	2.069	7	97.024	7	5.668	7	177.974	7	0	7	104.189	7	5.962	7	82.63	7	3.94
8	1.934	8	138.177	8	0	8	83.5409	8	5.778	8	128.547	8	1	8	169.041	8	1.352	8	134.171	8	6.045	8	135.32	8	1.653	8	120.04	8	10.584	8	94.475	8	1.47	8	79.976	8	6.296	8	154.854	8	0.175	8	93.836	8	7.238	8	76.211	8	2.818
9	2	9	126.353	9	0	9	83.4785	9	3.063	9	112.56	9	1.0936	9	161.452	9	1.779	9	113.784	9	8.645	9	120.303	9	1.621	9	112.415	9	9.183	9	76.144	9	1.071	9	67.199	9	5.212	9	141.752	9	0.482	9	85.275	9	4.675	9	71.712	9	1.793
10	1.088	10	107.094	10	0	10	81.5362	10	2	10	97.9711	10	1.2067	10	148.063	10	2.429	10	101.979	10	9.15	10	105.553	10	1.038	10	108.014	10	5.411	10	62.34	10	1.57	10	60.294	10	4.167	10	133.278	10	1.424	10	79.843	10	2.452	10	65.392	10	1.586
11	1	11	90.574	11	0	11	75.7655	11	2.134	11	85.9751	11	1.3132	11	125.524	11	2.005	11	103.033	11	7.127	11	90.934	11	1	11	104.545	11	3.57	11	56.911	11	2	11	58.257	11	2.97	11	120.674	11	2.249	11	80.215	11	0.862	11	62.801	11	1.049
12	1	12	83.957	12	0	12	73.0303	12	3.037	12	80.109	12	1.0346	12	109.389	12	2	12	108.848	12	3.607	12	82.993	12	1	12	100.812	12	2.231	12	60.131	12	2	12	60.558	12	2.528	12	110.119	12	3.021	12	84.898	12	0.347	12	61.329	12	1
13	1	13	82.737	13	0	13	73.198	13	3.057	13	72.6341	13	1	13	99.213	13	1.442	13	112.994	13	1.283	13	77.184	13	1	13	96.32	13	1.166	13	68.805	13	1.704	13	65.369	13	2.322	13	102.183	13	4.206	13	93.156	13	0	13	58.801	13	0.131
14	1	14	86.014	14	0.728	14	75.9817	14	3.943	14	66.697	14	0.0938	14	89.68	14	1.392	14	112.916	14	0	14	73.27	14	1	14	89.364	14	0.921	14	75.691	14	1.307	14	67.652	14	2.116	14	97.156	14	5.425	14	104.279	14	0	14	57.372	14	0
15	1	15	91.226	15	1.041	15	76.2913	15	3.317	15	64.1482	15	0	15	79.025	15	1.348	15	105.793	15	0	15	70.599	15	1	15	84.733	15	0.15	15	78.715	15	1	15	68.546	15	2.739	15	100.474	15	6.148	15	113.523	15	0.152	15	61.103	15	0
16	1	16	89.171	16	2.379	16	74.3029	16	2.484	16	68.8983	16	0	16	73.664	16	1.305	16	95.16	16	0	16	71.346	16	1	16	83.827	16	0	16	81.375	16	1.011	16	68.979	16	3.88	16	106.875	16	6.677	16	125.214	16	0	16	66.123	16	0
17	1	17	82.743	17	4.786	17	71.1	17	3.274	17	72.52	17	0	17	76.435	17	1.004	17	93.289	17	0	17	74.302	17	1	17	86.23	17	0	17	86.539	17	1.503	17	68.152	17	5.328	17	117.073	17	7	17	135.57	17	0.011	17	66.448	17	0
18	0.686	18	74.112	18	6.12	18	69.3887	18	5.165	18	74.0026	18	0	18	79.886	18	1	18	100.779	18	0	18	78.269	18	1.053	18	92.711	18	0.533	18	92.113	18	2.745	18	66.032	18	5.671	18	128.676	18	6.98	18	146.545	18	0	18	63.346	18	0.447
19	0.499	19	71.326	19	5.643	19	69.6252	19	6.504	19	74.471	19	0.7325	19	83.295	19	1.811	19	107.362	19	0	19	83.881	19	1.709	19	102.148	19	1	19	93.64	19	4.008	19	62.95	19	4.067	19	131.563	19	6.967	19	147.486	19	0.098	19	60.902	19	1.496
20	0.063	20	72.304	20	4.419	20	71.2406	20	6.669	20	73.4714	20	0.9652	20	85.358	20	1.869	20	114.217	20	0	20	82.965	20	3.067	20	109.363	20	1	20	95.349	20	4.325	20	61.369	20	1.726	20	126.183	20	6.151	20	134.319	20	0.577	20	62.655	20	2.627
21	0	21	74.055	21	3.36	21	75.3381	21	4.861	21	70.7994	21	1.8664	21	81.308	21	1.912	21	119.806	21	0	21	83.011	21	5	21	113.78	21	1	21	97.025	21	2.796	21	57.951	21	1	21	119.928	21	4.391	21	117.617	21	1.032	21	66.36	21	3.735
22	0.812	22	74.575	22	2.427	22	83.233	22	2.499	22	69.974	22	2.8607	22	72.795	22	2.935	22	124.982	22	0	22	83.16	22	4.953	22	120.648	22	1	22	97	22	1.252	22	57.77	22	1.598	22	111.756	22	2.91	22	99.652	22	1	22	71.042	22	2.995
23	1	23	74.221	23	1.447	23	89.1921	23	1.044	23	73.0454	23	4.71	23	68.974	23	2.999	23	127.933	23	0	23	77.137	23	3.993	23	131.175	23	1.57	23	93.499	23	1.049	23	58.596	23	3.156	23	100.256	23	2.517	23	91.774	23	1	23	79.095	23	2.583
24	1	24	76.915	24	0.843	24	91.4977	24	1	24	79.1784	24	5.8493	24	69.291	24	3.445	24	128.605	24	0	24	76.493	24	2.08	24	131.944	24	2	24	89.943	24	1	24	60.263	24	5.136	24	93.794	24	2.576	24	94.254	24	1	24	82.169	24	2.606
25	1	25	80.116	25	0.438	25	93.0762	25	1	25	86.1422	25	4.4776	25	72.47	25	3.9	25	133.803	25	0	25	80.214	25	2	25	124.454	25	2.185	25	93.695	25	1	25	64.423	25	6.224	25	94.659	25	1.921	25	100.045	25	1	25	82.01	25	2.407
26	1.463	26	83.918	26	0.515	26	95.137	26	1.113	26	89.6913	26	2.3386	26	79.406	26	3.468	26	140.631	26	0	26	84.132	26	2.66	26	114.716	26	2.652	26	100.32	26	1	26	68.441	26	4.774	26	94.215	26	0.802	26	105.897	26	2.162	26	74.178	26	1.888
27	1.465	27	85.966	27	1	27	95.5456	27	1.063	27	88.1852	27	1.1678	27	85.984	27	4.972	27	143.391	27	0.413	27	84.102	27	4.409	27	107.011	27	2.07	27	101.922	27	1	27	73.072	27	2.708	27	94.111	27	0.433	27	106.625	27	2.072	27	65.146	27	1.436
28	1.08	28	85.97	28	1.273	28	94.692	28	1	28	80.9441	28	1	28	93.488	28	10.315	28	139.947	28	1.334	28	86.413	28	6.084	28	102.878	28	1.188	28	99.968	28	1	28	77.816	28	1.256	28	97.875	28	1.025	28	105.727	28	2.159	28	62.399	28	0.589
29	0.402	29	83.544	29	1.828	29	92.6172	29	1.28	29	75.0591	29	1	29	102.473	29	16.259	29	132.126	29	2.701	29	85.884	29	6.441	29	101.004	29	1	29	101.85	29	1.087	29	78.635	29	0.36	29	104.078	29	2.393	29	106.296	29	1.129	29	66.337	29	0.193
30	0.077	30	81.744	30	1.659	30	91.2263	30	2.096	30	71.845	30	1	30	115.833	30	19.003	30	122.111	30	3.74	30	77.424	30	5.117	30	99.228	30	1	30	103.575	30	1.487	30	75.869	30	0.635	30	110.471	30	4.736	30	107.37	30	1.125	30	78.749	30	0
31	0	31	83.579	31	1.186	31	91.4053	31	4.857	31	72.4218	31	0.5498	31	123.154	31	15.124	31	122.962	31	4.519	31	73.829	31	3.688	31	97.136	31	0.992	31	102.084	31	1.474	31	74.854	31	1.828	31	114.001	31	5.612	31	110.019	31	1.186	31	86.789	31	0
32	0	32	82.312	32	0.652	32	88.9782	32	9.392	32	76.5589	32	0.5504	32	122.08	32	9.761	32	124.27	32	3.992	32	75.502	32	2.813	32	93.201	32	0.263	32	104.665	32	0.761	32	75.923	32	3.367	32	108.609	32	4.581	32	114.158	32	1.892	32	87.483	32	0
33	0.496	33	84.094	33	0	33	85.928	33	14.188	33	81.3338	33	0.1327	33	120.683	33	5.374	33	112.108	33	3.273	33	80.364	33	1	33	96.035	33	0	33	105.322	33	0.302	33	76.841	33	6.874	33	104.878	33	1.962	33	115.944	33	2.791	33	89.127	33	0
34	0.559	34	91.979	34	0	34	87.0087	34	15.563	34	84.2878	34	0.7924	34	120.17	34	7.342	34	107.647	34	1.759	34	85.723	34	0.587	34	96.621	34	0	34	107.59	34	0	34	79.687	34	10.368	34	101.858	34	1.219	34	115.482	34	2.036	34	89.632	34	0
35	0.43	35	96.399	35	0	35	88.4858	35	12.152	35	80.4506	35	1	35	122.258	35	9.414	35	120.836	35	1.054	35	89.579	35	0.019	35	99.389	35	0	35	105.236	35	0	35	78.022	35	13.888	35	104.295	35	0.556	35	111.281	35	0.508	35	89.022	35	0
36	0.301	36	97.874	36	0	36	89.1383	36	7.338	36	73.8331	36	1.781	36	119.834	36	9.225	36	134.743	36	1.904	36	87.917	36	0	36	103.941	36	0	36	96.524	36	0.153	36	74.695	36	14.378	36	109.833	36	1.29	36	106.571	36	0	36	89.99	36	0
37	0.171	37	98.74	37	0	37	88.7669	37	3.861	37	66.2259	37	3.5558	37	116.809	37	6.481	37	142.563	37	3.147	37	81.781	37	0	37	110.156	37	0	37	84.887	37	1.132	37	73.071	37	9.662	37	113.906	37	2.024	37	105.195	37	0	37	90.895	37	0
38	0.042	38	99.621	38	0	38	88.4706	38	2.773	38	62.1044	38	3.6187	38	109.232	38	3.439	38	144.98	38	4.543	38	79.043	38	0	38	118.022	38	0	38	73.18	38	1.983	38	74.052	38	4.643	38	115.845	38	2.974	38	112.805	38	0	38	90.39	38	0
39	0	39	98.562	39	0.152	39	86.8967	39	2.411	39	62.7298	39	3.0494	39	101.555	39	1.766	39	141.299	39	5.813	39	79.833	39	0	39	128.363	39	0	39	70.826	39	1.667	39	75.664	39	1.322	39	106.908	39	3.428	39	120.711	39	0	39	88.245	39	0
40	0	40	95.529	40	1.175	40	85.9939	40	2.168	40	69.4193	40	2.3478	40	96.09	40	1.09	40	133.207	40	3.68	40	79.766	40	0	40	141.801	40	0	40	77.444	40	0.404	40	75.401	40	0.063	40	103.113	40	3.407	40	131.617	40	0	40	84.466	40	0
41	0	41	93.332	41	2.74	41	88.097	41	1.229	41	74.1453	41	1.3884	41	89.827	41	2.013	41	119.464	41	1.288	41	79.93	41	0	41	144.21	41	0	41	82.136	41	0.004	41	74.91	41	0.403	41	101.68	41	3.032	41	133.12	41	0	41	77.121	41	0
42	0	42	92.561	42	3.87	42	89.8184	42	1	42	81.0273	42	1	42	83.373	42	2.339	42	119	42	0	42	80.199	42	0	42	140.984	42	0	42	81.363	42	0	42	79.937	42	0.891	42	104.814	42	3.189	42	132.977	42	0.879	42	70.394	42	0
43	0	43	91.353	43	4.295	43	89.0896	43	0.386	43	83.962	43	0.4589	43	83.526	43	2.064	43	118.785	43	0	43	79.655	43	0	43	128.044	43	0	43	83.384	43	0	43	83.544	43	2.108	43	105.237	43	3.068	43	132.169	43	6.315	43	67.483	43	0
44	0	44	89.722	44	3.666	44	89.5819	44	0.535	44	85.129	44	0	44	89.081	44	4.231	44	113.31	44	0	44	75.752	44	0	44	111.724	44	0	44	84.387	44	0	44	85.293	44	2.853	44	103.307	44	2.198	44	128.891	44	23.119	44	65.935	44	0
45	0	45	91.048	45	1.622	45	89.4807	45	1.686	45	82.3217	45	0	45	93.897	45	6.17	45	112.558	45	0	45	74.278	45	0.094	45	100.502	45	0	45	88.433	45	0	45	88.374	45	3.013	45	104.503	45	1.227	45	130.212	45	54.791	45	65.419	45	0
46	0	46	91.523	46	0.078	46	87.5722	46	3.648	46	77.4943	46	0	46	96.353	46	5.043	46	111.582	46	0	46	77.936	46	0	46	96.011	46	0	46	95.485	46	0	46	88.439	46	2.447	46	106.982	46	0.226	46	125.556	46	90.403	46	67.753	46	0
47	0	47	92.233	47	0.004	47	85.2237	47	6.375	47	71.3967	47	0	47	94.665	47	2.14	47	107.047	47	0	47	83.118	47	0	47	94.818	47	0	47	94.83	47	0	47	84.681	47	1.979	47	105.673	47	0	47	116.849	47	116.679	47	69.767	47	0
48	0	48	95.429	48	0	48	85.1881	48	9.036	48	66.2818	48	0	48	88.455	48	0.485	48	106.881	48	0	48	88.774	48	0	48	93.102	48	0	48	88.214	48	0	48	81.795	48	0.973	48	109.874	48	0	48	116.727	48	137.167	48	68.232	48	0
49	0	49	95.617	49	0	49	89.1954	49	9.768	49	64.3939	49	0	49	84.185	49	0.628	49	106.381	49	0	49	95.075	49	0.162	49	93.025	49	0	49	86.831	49	0	49	79.539	49	1.513	49	118.299	49	0	49	117.088	49	151.752	49	65.911	49	0
50	0	50	96.721	50	0	50	92.774	50	7.791	50	66.3317	50	0	50	84.614	50	6.016	50	104.074	50	0	50	95.014	50	0.829	50	90.658	50	0	50	85.901	50	0	50	79.303	50	3.994	50	124.343	50	0	50	113.704	50	160.468	50	66.872	50	0
51	0	51	97.313	51	0	51	95.7481	51	4.343	51	70.0775	51	0	51	88.28	51	22.007	51	99.836	51	0	51	86.385	51	2.575	51	91.398	51	0	51	83.669	51	0	51	81.453	51	7.376	51	128.176	51	0	51	113.595	51	164.628	51	73.694	51	0
52	0	52	94.384	52	0	52	101.202	52	1.97	52	69.7983	52	0	52	90.462	52	51.259	52	104.961	52	0	52	80.048	52	7.557	52	94.529	52	0	52	81.7	52	0	52	87.168	52	7.913	52	127.28	52	0	52	117.496	52	156.307	52	83.478	52	0
53	0	53	89.964	53	0	53	109.788	53	1	53	68.3485	53	0	53	95.302	53	74.017	53	106.272	53	0	53	74.704	53	14.226	53	96.844	53	0	53	81.339	53	0	53	93.587	53	4.702	53	126.674	53	0	53	117.408	53	130.715	53	89.818	53	0
54	0	54	82.507	54	0	54	111.802	54	1.172	54	71.376	54	0	54	100.153	54	88.387	54	105.874	54	0	54	68.565	54	29.023	54	96.29	54	0	54	83.009	54	0.229	54	92.938	54	0.828	54	130.599	54	0	54	110.725	54	94.711	54	87.411	54	0
55	1.699	55	76.377	55	0	55	112.624	55	1.287	55	75.3588	55	0	55	102.266	55	113.15	55	106.551	55	0	55	66.033	55	57.304	55	94.463	55	0	55	82.796	55	1.178	55	86.832	55	0	55	134.352	55	0	55	104.018	55	66.984	55	81.423	55	0
56	8.199	56	73.221	56	0.667	56	106.769	56	1.346	56	73.6684	56	0	56	103.66	56	132.896	56	103.039	56	0.002	56	65.996	56	110.678	56	88.748	56	0	56	87.588	56	2.216	56	77.755	56	0	56	133.424	56	0	56	99.235	56	39.191	56	78.601	56	0.026
57	21.409	57	69.59	57	7.376	57	93.9158	57	0.673	57	68.9999	57	0	57	108.722	57	142.901	57	96.381	57	0.558	57	70.649	57	172.624	57	77.525	57	0.833	57	95.925	57	4.354	57	68.071	57	0	57	125.326	57	0	57	92.913	57	19.12	57	75.305	57	0.889
58	38.752	58	68.361	58	26.881	58	79.2287	58	0.099	58	70.0154	58	0	58	120.358	58	144.691	58	92.417	58	3.826	58	80.259	58	195.14	58	69.039	58	5.833	58	98.76	58	9.491	58	68.254	58	0	58	119.557	58	1.564	58	86.612	58	8.06	58	70.045	58	5.902
59	59.183	59	69.555	59	59.666	59	66.6648	59	0	59	70.7838	59	0	59	125.894	59	144.822	59	89.676	59	10.992	59	87.028	59	152.223	59	69.611	59	19.179	59	97.809	59	16.131	59	64.462	59	0	59	117.538	59	9.055	59	81.16	59	2.371	59	70.096	59	22.84
60	88.689	60	71.233	60	90.393	60	62.6305	60	0	60	70.6377	60	0	60	113.269	60	138.273	60	92.962	60	22.581	60	86.392	60	80.954	60	72	60	47.978	60	93.457	60	22.498	60	59.518	60	0	60	115.873	60	26.199	60	76.241	60	0.775	60	67.365	60	54.929
61	123.035	61	72.575	61	112.345	61	66.9937	61	0	61	69.7513	61	0	61	97.051	61	142.471	61	98.972	61	33.952	61	82.739	61	28.256	61	72.201	61	92.094	61	89.851	61	30.789	61	55.925	61	0	61	113.896	61	52.814	61	72.014					61	100.866
62	143.526	62	74.87	62	119.221	62	73.7749	62	0	62	73.7737	62	0	62	82.709	62	130.44	62	101.31	62	53.3	62	79.253	62	9.929	62	74.88	62	130.463	62	89.759	62	59.131	62	53.647	62	0	62	110.913	62	85.987	62	72.632					62	151.035
63	141.101	63	79.203	63	121.659	63	83.3482	63	0	63	78.0525	63	0	63	77.585	63	92.654	63	101.67	63	69.884	63	72.364	63	3.43	63	79.788	63	161.284	63	84.723	63	99.072	63	50.777	63	0.539	63	109.501	63	118.727	63	80.124					63	191.037
64	122.974	64	85.132	64	116.077	64	90.7427	64	0	64	76.4002	64	0	64	79.586	64	50.272	64	99.51	64	81.076	64	64.92	64	0.551	64	90.22	64	181.1	64	82.739	64	110.306	64	47.137	64	5.436	64	99.107	64	147.547	64	86.407					64	200.148
65	96.343	65	91.413	65	91.91	65	96.298	65	0.422	65	73.7282	65	0	65	91.022	65	19.824	65	96.086	65	86.834	65	65.248	65	0	65	99.751	65	185.71	65	82.156	65	96.679	65	45.408	65	17.866	65	85.058	65	178.739	65	95.994					65	172.668
66	67.049	66	96.171	66	58.791	66	101.09	66	1.949	66	71.5031	66	0	66	105.763	66	5.168	66	92.269	66	100.75	66	68.073	66	0	66	109.095	66	177.062	66	79.19	66	82.651	66	45.979	66	54.19	66	78.983	66	194.936	66	102.261					66	129.704
67	39.033	67	99.921	67	28.038	67	106.984	67	6.188	67	69.185	67	0	67	120.882	67	0.033	67	91.246	67	113.085	67	73.378	67	0.212	67	116.676	67	156.088	67	78.55	67	76.074	67	48.284	67	100.203	67	79.99	67	181.327	67	105.464					67	85.243
68	17.075	68	102.655	68	11.058	68	107.559	68	14.704	68	66.5601	68	0	68	127.532	68	0.104	68	97.827	68	94.992	68	73.568	68	0.66	68	115.244	68	125.816	68	79.757	68	63.626	68	52.725	68	139.43	68	85.061	68	128.447	68	101.994					68	47.709
69	5.325	69	103.794	69	3.072	69	110.584	69	29.127	69	63.7678	69	0	69	120.719	69	1.056	69	101.263	69	57.592	69	74.63	69	0.787	69	105.37	69	94.147	69	81.428	69	43.013	69	56.903	69	142.994	69	89.978	69	62.634	69	97.986					69	24.87
70	1.365	70	101.416	70	0.523	70	106.345	70	48.63	70	63.5447	70	0	70	107.913	70	3.446	70	100.388	70	21.225	70	80.049	70	0	70	93.582	70	66.755	70	88.713	70	26.004	70	58.16	70	113.623	70	94.106	70	19.71	70	96.11					70	13.865
71	1.108	71	99.284	71	0	71	103.949	71	70.885	71	63.7688	71	0.1629	71	91.837	71	4.492	71	105.341	71	6.517	71	84.983	71	0	71	90.021	71	50.487	71	101.939	71	13.1	71	57.096	71	75.387	71	96.659	71	3.781	71	100.456					71	8.053
72	1.176	72	99.403	72	0	72	100.584	72	84.336	72	63.1415	72	3.2758	72	73.867	72	3.686	72	105.372	72	1.292	72	86.534	72	0	72	96.462	72	33.491	72	110.545	72	4.583	72	60.558	72	39.41	72	103.563	72	0	72	111.454					72	4.99
73	0.955	73	98.284	73	0	73	98.7307	73	94.606	73	63.8537	73	12.2902	73	58.897	73	1.994	73	107.328	73	0.152	73	85.865	73	0	73	94.461	73	20.698	73	115.633	73	0.797	73	67.279	73	16.207	73	113.329	73	0	73	118.365					73	3.186
74	0	74	97.074	74	0	74	92.2342	74	101.079	74	65.3663	74	27.1005	74	51.148	74	0.831	74	118.049	74	0	74	82.408	74	0	74	97.428	74	11.789	74	112.992	74	0	74	72.104	74	4.533	74	124.118	74	0	74	121.765					74	1.67
75	0	75	92.845	75	0	75	83.096	75	115.633	75	68.4871	75	37.5955	75	51.023	75	0.565	75	125.436	75	0	75	83.173	75	0.122	75	101.076	75	5.721	75	109.974	75	0	75	73.622	75	0.772	75	130.334	75	0	75	121.907					75	0.211
76	0	76	90.059					76	133.438	76	72.2235	76	41.2725	76	54.124	76	1	76	122.245	76	0	76	89.229	76	0.362	76	98.493	76	2.06	76	107.506	76	0	76	72.495	76	0	76	129.801	76	0	76	122.379					76	0
77	0	77	91.162					77	151.491	77	72.723	77	37.8468	77	62.105	77	1.083	77	115.102	77	0	77	92.307	77	0.199	77	88.404	77	0.581	77	100.304	77	0	77	71.422	77	0	77	124.206	77	0	77	119.337					77	0
78	0	78	94.746					78	180.789	78	73.2854	78	33.3438	78	74.955	78	1.974	78	105.286	78	0	78	91.864					78	0	78	96.614	78	0	78	67.774	78	0	78	119.656	78	0	78	115.63					78	0
79	0	79	93.567					79	204.168	79	74.2258	79	28.5408	79	90.397					79	0	79	89.147					79	0	79	91.903	79	0	79	68.007	79	0	79	120.223	79	0	79	105.029					79	0
80	0	80	89.54					80	216.424	80	79.2429	80	24.9942	80	104.894					80	0	80	85.78					80	0	80	92.032	80	0	80	74.233	80	0	80	128.594									80	0
81	0	81	87.83					81	194.317	81	83.1617	81	23.7886	81	117.038					81	0	81	80.982					81	0	81	100.586	81	0	81	74.684	81	0	81	132.097									81	0.064
82	0	82	82.484					82	129.9	82	84.3603	82	25.5037	82	121.15					82	0	82	81.107					82	0	82	97.468	82	0	82	79.784	82	0	82	130.746									82	0.771
83	0.011	83	74.956					83	66.901	83	91.818	83	23.7681	83	121.695					83	0	83	83.404					83	0	83	93.604					83	0	83	128.865
84	0.671	84	63.335					84	27.853	84	92.3492	84	16.5569	84	122.04					84	0	84	80.398					84	0	84	87.612					84	0	84	131.88
								85	9.416	85	87.7301	85	7.1928	85	121.323													85	0	85	78.425					85	0	85	135.016
								86	2.416	86	85.8699	86	2.5258	86	112.058																					86	0	86	138.657
								87	0.371	87	89.9746	87	1.7962	87	99.635																					87	0	87	138.039
								88	0	88	92.2337	88	1.361	88	89.33																					88	0	88	138.658
								89	0	89	96.6293	89	1.002	89	83.421																					89	0.034	89	128.999
								90	0	90	94.269	90	0.6431	90	84.5																					90	0.919	90	112.921
								91	0	91	89.5949	91	0.2841	91	87.685
								92	0	92	84.2413	92	0	92	88.786
												93	0	93	85.21
												94	0	94	81.693
												95	0	95	78.293
												96	0	96	76.194
												97	0	97	77.875
												98	0	98	80.595
												99	0	99	81.803
												100	0	100	75.097
[truncated: 46 more columns]

## Sheet: Binned
5	1	FISH	IF	3	FISH	IF	4	FISH	IF	5	FISH	IF	6	FISH	IF	7	FISH	IF	8	FISH	IF	9	FISH	IF	10	FISH	IF	11	FISH	IF	12	FISH	IF	13	FISH	IF	14	FISH	IF	15	FISH	IF	17	FISH	IF	18	FISH	IF	19
X	X	Y	Y	X	Y	Y	X	Y	Y	X	Y	Y	X	Y	Y	X	Y	Y	X	Y	Y	X	Y	Y	X	Y	Y	X	Y	Y	X	Y	Y	X	Y	Y	X	Y	Y	X	Y	Y	X	Y	Y	X	Y	Y	X
0	0	2	198	0	9	162	0	2	132	0	1	181	0	7	203	0	1	189	0	1	209	0	1	220	0	4	178	0	1	216	0	2	219	0	5	183	0	3	176	0	2	72	0	2	152	0	1	115	0
1	1.19048	1.999	193.639	1.33333	10.184	158.839	1.08696	4.088	142.614	1	1.4961	193.221	1.28205	11.952	200.003	1.19048	1.719	192.108	1.2987	1.279	215.143	1.17647	1	214.118	1.21951	2.403	185.306	1.11111	1	222.004	1.26582	2	207.483	1.66667	3.861	189.278	1.21951	2.01	208.951	1.36986	1.96	74.0383	1.44928	2.952	167.394	1.40845	0.051	120.903	1.07527
2	2.38095	1.018	187.832	2.66667	8.093	147.206	2.17391	5.334	141.97	2	1.9923	200.161	2.5641	17.902	192.493	2.38095	2.267	193.397	2.5974	1.582	209.438	2.35294	1	207.831	2.43902	1.168	182.399	2.22222	1	214.989	2.53165	1.115	188.114	3.33333	3.425	189.745	2.43902	1.723	221.047	2.73973	6.752	78.2332	2.89855	3.333	174.59	2.8169	0	117.081	2.15054
3	3.57143	1	180.788	4	4.233	129.838	3.26087	5.776	142.421	3	1.8837	201.153	3.84615	22.596	185.15	3.57143	2	192.986	3.8961	1.114	202.288	3.52941	1	207.565	3.65854	1	173.005	3.33333	1	219.027	3.79747	1	169.74	5	3	179.528	3.65854	1.576	217.927	4.10959	12.267	80.2353	4.34783	3.194	175.552	4.22535	0	115.126	3.22581
4	4.7619	1	170.878	5.33333	1.432	114.397	4.34783	6.287	140.345	4	1.5189	200.001	5.12821	17.671	180.712	4.7619	2	188.649	5.19481	1.719	187.55	4.70588	1.312	188.689	4.87805	1.584	158.23	4.44444	1	214.731	5.06329	0.74	149.762	6.66667	3	157.48	4.87805	1.434	202.193	5.47945	17.384	80.001	5.7971	2.993	174.994	5.6338	0.211	109.118	4.30108
5	5.95238	1	163.968	6.66667	0.117	100.361	5.43478	6.89	139.258	5	1.3167	204.125	6.41026	9.04	175.892	5.95238	1.213	178.676	6.49351	1.544	169.165	5.88235	3.022	164.967	6.09756	2.906	139.198	5.55556	1.92	214.049	6.32911	0.094	131.977	8.33333	3.154	124.982	6.09756	2.243	192.929	6.84932	14.611	76.6139	7.24638	4.211	174.977	7.04225	1.325	103.39	5.37634
6	7.14286	1	154.286	8	0	90.4774	6.52174	7.686	137.649	6	1	202.096	7.69231	4.028	165.279	7.14286	1.367	162.265	7.79221	1.253	148.978	7.05882	5.145	137.311	7.31707	3.174	118.827	6.66667	3.979	203.55	7.59494	0	117.051	10	4.107	97.897	7.31707	3.234	186.917	8.21918	9.066	67.5635	8.69565	4.918	167.063	8.4507	2.589	96.5342	6.45161
7	8.33333	1.07	147.183	9.33333	0	84.5612	7.6087	8.071	136.125	7	1	185.301	8.97436	2.013	151.093	8.33333	2.922	150.671	9.09091	1	132.773	8.23529	8.522	113.657	8.53659	2.069	97.024	7.77778	5.668	177.974	8.86076	0	104.189	11.6667	5.962	82.63	8.53659	3.94	173.035	9.58904	3.749	58.4908	10.1449	4.502	156.018	9.85915	5.213	85.1058	7.52688
8	9.52381	1.934	138.177	10.6667	0	83.5409	8.69565	5.778	128.547	8	1	169.041	10.2564	1.352	134.171	9.52381	6.045	135.32	10.3896	1.653	120.04	9.41176	10.584	94.475	9.7561	1.47	79.976	8.88889	6.296	154.854	10.1266	0.175	93.836	13.3333	7.238	76.211	9.7561	2.818	156.193	10.9589	3.004	48.1067	11.5942	3.383	141.853	11.2676	6.495	74.6948	8.60215
9	10.7143	2	126.353	12	0	83.4785	9.78261	3.063	112.56	9	1.0936	161.452	11.5385	1.779	113.784	10.7143	8.645	120.303	11.6883	1.621	112.415	10.5882	9.183	76.144	10.9756	1.071	67.199	10	5.212	141.752	11.3924	0.482	85.275	15	4.675	71.712	10.9756	1.793	135.213	12.3288	3.636	38.6285	13.0435	1.97	127.183	12.6761	5.078	68.5989	9.67742
10	11.9048	1.088	107.094	13.3333	0	81.5362	10.8696	2	97.9711	10	1.2067	148.063	12.8205	2.429	101.979	11.9048	9.15	105.553	12.987	1.038	108.014	11.7647	5.411	62.34	12.1951	1.57	60.294	11.1111	4.167	133.278	12.6582	1.424	79.843	16.6667	2.452	65.392	12.1951	1.586	114.807	13.6986	4.196	31.6547	14.4928	2	106.685	14.0845	3.026	64.9694	10.7527
11	13.0952	1	90.574	14.6667	0	75.7655	11.9565	2.134	85.9751	11	1.3132	125.524	14.1026	2.005	103.033	13.0952	7.127	90.934	14.2857	1	104.545	12.9412	3.57	56.911	13.4146	2	58.257	12.2222	2.97	120.674	13.9241	2.249	80.215	18.3333	0.862	62.801	13.4146	1.049	94.73	15.0685	3.129	28.0313	15.942	2	86.702	15.493	1.564	61.4663	11.828
12	14.2857	1	83.957	16	0	73.0303	13.0435	3.037	80.109	12	1.0346	109.389	15.3846	2	108.848	14.2857	3.607	82.993	15.5844	1	100.812	14.1176	2.231	60.131	14.6341	2	60.558	13.3333	2.528	110.119	15.1899	3.021	84.898	20	0.347	61.329	14.6341	1	78.707	16.4384	2.525	27.9596	17.3913	1.574	77.013	16.9014	0.616	59.8635	12.9032
13	15.4762	1	82.737	17.3333	0	73.198	14.1304	3.057	72.6341	13	1	99.213	16.6667	1.442	112.994	15.4762	1.283	77.184	16.8831	1	96.32	15.2941	1.166	68.805	15.8537	1.704	65.369	14.4444	2.322	102.183	16.4557	4.206	93.156	21.6667	0	58.801	15.8537	0.131	66.333	17.8082	1.491	27.4862	18.8406	0.99	77.168	18.3099	0.111	61.4806	13.9785
14	16.6667	1	86.014	18.6667	0.728	75.9817	15.2174	3.943	66.697	14	0.0938	89.68	17.9487	1.392	112.916	16.6667	0	73.27	18.1818	1	89.364	16.4706	0.921	75.691	17.0732	1.307	67.652	15.5556	2.116	97.156	17.7215	5.425	104.279	23.3333	0	57.372	17.0732	0	58.979	19.1781	1.005	26.8872	20.2899	0.338	79.995	19.7183	0.588	65.1166	15.0538
15	17.8571	1	91.226	20	1.041	76.2913	16.3043	3.317	64.1482	15	0	79.025	19.2308	1.348	105.793	17.8571	0	70.599	19.4805	1	84.733	17.6471	0.15	78.715	18.2927	1	68.546	16.6667	2.739	100.474	18.9873	6.148	113.523	25	0.152	61.103	18.2927	0	59.856	20.5479	0.408	28.3813	21.7391	0.283	78.66	21.1268	1.23	71.0658	16.129
16	19.0476	1	89.171	21.3333	2.379	74.3029	17.3913	2.484	68.8983	16	0	73.664	20.5128	1.305	95.16	19.0476	0	71.346	20.7792	1	83.827	18.8235	0	81.375	19.5122	1.011	68.979	17.7778	3.88	106.875	20.2532	6.677	125.214	26.6667	0	66.123	19.5122	0	65.917	21.9178	0.992	28.7164	23.1884	0.958	76.702	22.5352	2.19	76.3899	17.2043
17	20.2381	1	82.743	22.6667	4.786	71.1	18.4783	3.274	72.52	17	0	76.435	21.7949	1.004	93.289	20.2381	0	74.302	22.0779	1	86.23	20	0	86.539	20.7317	1.503	68.152	18.8889	5.328	117.073	21.519	7	135.57	28.3333	0.011	66.448	20.7317	0	70.299	23.2877	1	29.3113	24.6377	1	74.72	23.9437	3.503	78.5058	18.2796
18	21.4286	0.686	74.112	24	6.12	69.3887	19.5652	5.165	74.0026	18	0	79.886	23.0769	1	100.779	21.4286	0	78.269	23.3766	1.053	92.711	21.1765	0.533	92.113	21.9512	2.745	66.032	20	5.671	128.676	22.7848	6.98	146.545	30	0	63.346	21.9512	0.447	73.102	24.6575	0.723	31.6843	26.087	1.019	77.337	25.3521	4.669	75.595	19.3548
19	22.619	0.499	71.326	25.3333	5.643	69.6252	20.6522	6.504	74.471	19	0.7325	83.295	24.359	1.811	107.362	22.619	0	83.881	24.6753	1.709	102.148	22.3529	1	93.64	23.1707	4.008	62.95	21.1111	4.067	131.563	24.0506	6.967	147.486	31.6667	0.098	60.902	23.1707	1.496	76.67	26.0274	0.012	31.9963	27.5362	1.701	80.786	26.7606	4.942	70.925	20.4301
20	23.8095	0.063	72.304	26.6667	4.419	71.2406	21.7391	6.669	73.4714	20	0.9652	85.358	25.641	1.869	114.217	23.8095	0	82.965	25.974	3.067	109.363	23.5294	1	95.349	24.3902	4.325	61.369	22.2222	1.726	126.183	25.3165	6.151	134.319	33.3333	0.577	62.655	24.3902	2.627	77.794	27.3973	0	33.968	28.9855	2	87.407	28.169	2.728	68.079	21.5054
21	25	0	74.055	28	3.36	75.3381	22.8261	4.861	70.7994	21	1.8664	81.308	26.9231	1.912	119.806	25	0	83.011	27.2727	5	113.78	24.7059	1	97.025	25.6098	2.796	57.951	23.3333	1	119.928	26.5823	4.391	117.617	35	1.032	66.36	25.6098	3.735	80.242	28.7671	0	35.9664	30.4348	1.998	89.989	29.5775	1.106	65.824	22.5806
22	26.1905	0.812	74.575	29.3333	2.427	83.233	23.913	2.499	69.974	22	2.8607	72.795	28.2051	2.935	124.982	26.1905	0	83.16	28.5714	4.953	120.648	25.8824	1	97	26.8293	1.252	57.77	24.4444	1.598	111.756	27.8481	2.91	99.652	36.6667	1	71.042	26.8293	2.995	83.417	30.137	0.864	36	31.8841	3.674	90.072	30.9859	0.129	67.5867	23.6559
23	27.381	1	74.221	30.6667	1.447	89.1921	25	1.044	73.0454	23	4.71	68.974	29.4872	2.999	127.933	27.381	0	77.137	29.8701	3.993	131.175	27.0588	1.57	93.499	28.0488	1.049	58.596	25.5556	3.156	100.256	29.1139	2.517	91.774	38.3333	1	79.095	28.0488	2.583	82.498	31.5068	0.919	35.0184	33.3333	7.038	93.42	32.3944	0	66.4098	24.7312
24	28.5714	1	76.915	32	0.843	91.4977	26.087	1	79.1784	24	5.8493	69.291	30.7692	3.445	128.605	28.5714	0	76.493	31.1688	2.08	131.944	28.2353	2	89.943	29.2683	1	60.263	26.6667	5.136	93.794	30.3797	2.576	94.254	40	1	82.169	29.2683	2.606	80.298	32.8767	0.959	36.9217	34.7826	11.865	97.844	33.8028	0	65.0536	25.8065
25	29.7619	1	80.116	33.3333	0.438	93.0762	27.1739	1	86.1422	25	4.4776	72.47	32.0513	3.9	133.803	29.7619	0	80.214	32.4675	2	124.454	29.4118	2.185	93.695	30.4878	1	64.423	27.7778	6.224	94.659	31.6456	1.921	100.045	41.6667	1	82.01	30.4878	2.407	83.28	34.2466	1	37.98	36.2319	13.653	99.207	35.2113	0	66.8807	26.8817
26	30.9524	1.463	83.918	34.6667	0.515	95.137	28.2609	1.113	89.6913	26	2.3386	79.406	33.3333	3.468	140.631	30.9524	0	84.132	33.7662	2.66	114.716	30.5882	2.652	100.32	31.7073	1	68.441	28.8889	4.774	94.215	32.9114	0.802	105.897	43.3333	2.162	74.178	31.7073	1.888	88.199	35.6164	1.01	39.4634	37.6812	11.075	94.95	36.6197	0	70.5153	27.957
27	32.1429	1.465	85.966	36	1	95.5456	29.3478	1.063	88.1852	27	1.1678	85.984	34.6154	4.972	143.391	32.1429	0.413	84.102	35.0649	4.409	107.011	31.7647	2.07	101.922	32.9268	1	73.072	30	2.708	94.111	34.1772	0.433	106.625	45	2.072	65.146	32.9268	1.436	88.391	36.9863	0.582	38.5896	39.1304	6.896	90.969	38.0282	0	72.407	29.0323
28	33.3333	1.08	85.97	37.3333	1.273	94.692	30.4348	1	80.9441	28	1	93.488	35.8974	10.315	139.947	33.3333	1.334	86.413	36.3636	6.084	102.878	32.9412	1.188	99.968	34.1463	1	77.816	31.1111	1.256	97.875	35.443	1.025	105.727	46.6667	2.159	62.399	34.1463	0.589	83.937	38.3562	0.614	38.0316	40.5797	4.347	97.262	39.4366	0	73	30.1075
29	34.5238	0.402	83.544	38.6667	1.828	92.6172	31.5217	1.28	75.0591	29	1	102.473	37.1795	16.259	132.126	34.5238	2.701	85.884	37.6623	6.441	101.004	34.1176	1	101.85	35.3659	1.087	78.635	32.2222	0.36	104.078	36.7089	2.393	106.296	48.3333	1.129	66.337	35.3659	0.193	77.163	39.726	1.067	38.8759	42.029	3.389	99.908	40.8451	0	73.0179	31.1828
30	35.7143	0.077	81.744	40	1.659	91.2263	32.6087	2.096	71.845	30	1	115.833	38.4615	19.003	122.111	35.7143	3.74	77.424	38.961	5.117	99.228	35.2941	1	103.575	36.5854	1.487	75.869	33.3333	0.635	110.471	37.9747	4.736	107.37	50	1.125	78.749	36.5854	0	71.688	41.0959	1.718	38.0187	43.4783	2.437	94.603	42.2535	0	72.0414	32.2581
31	36.9048	0	83.579	41.3333	1.186	91.4053	33.6957	4.857	72.4218	31	0.5498	123.154	39.7436	15.124	122.962	36.9048	4.519	73.829	40.2597	3.688	97.136	36.4706	0.992	102.084	37.8049	1.474	74.854	34.4444	1.828	114.001	39.2405	5.612	110.019	51.6667	1.186	86.789	37.8049	0	66.93	42.4658	1.641	37.0501	44.9275	1.835	87.098	43.662	0	69.5299	33.3333
32	38.0952	0	82.312	42.6667	0.652	88.9782	34.7826	9.392	76.5589	32	0.5504	122.08	41.0256	9.761	124.27	38.0952	3.992	75.502	41.5584	2.813	93.201	37.6471	0.263	104.665	39.0244	0.761	75.923	35.5556	3.367	108.609	40.5063	4.581	114.158	53.3333	1.892	87.483	39.0244	0	63.483	43.8356	0.947	35.3071	46.3768	1.668	81.575	45.0704	0	66.6005	34.4086
33	39.2857	0.496	84.094	44	0	85.928	35.8696	14.188	81.3338	33	0.1327	120.683	42.3077	5.374	112.108	39.2857	3.273	80.364	42.8571	1	96.035	38.8235	0	105.322	40.2439	0.302	76.841	36.6667	6.874	104.878	41.7722	1.962	115.944	55	2.791	89.127	40.2439	0	63.142	45.2055	0.229	32.535	47.8261	1.924	78.39	46.4789	0	65.75	35.4839
34	40.4762	0.559	91.979	45.3333	0	87.0087	36.9565	15.563	84.2878	34	0.7924	120.17	43.5897	7.342	107.647	40.4762	1.759	85.723	44.1558	0.587	96.621	40	0	107.59	41.4634	0	79.687	37.7778	10.368	101.858	43.038	1.219	115.482	56.6667	2.036	89.632	41.4634	0	65.455	46.5753	0	31.7149	49.2754	1.587	82.149	47.8873	0	68.2523	36.5591
35	41.6667	0.43	96.399	46.6667	0	88.4858	38.0435	12.152	80.4506	35	1	122.258	44.8718	9.414	120.836	41.6667	1.054	89.579	45.4545	0.019	99.389	41.1765	0	105.236	42.6829	0	78.022	38.8889	13.888	104.295	44.3038	0.556	111.281	58.3333	0.508	89.022	42.6829	0	69.11	47.9452	0	31.2058	50.7246	0.508	84.465	49.2958	0	71.4777	37.6344
36	42.8571	0.301	97.874	48	0	89.1383	39.1304	7.338	73.8331	36	1.781	119.834	46.1538	9.225	134.743	42.8571	1.904	87.917	46.7532	0	103.941	42.3529	0	96.524	43.9024	0.153	74.695	40	14.378	109.833	45.5696	1.29	106.571	60	0	89.99	43.9024	0	71.226	49.3151	0	31.3499	52.1739	0	90.037	50.7042	0	74.5522	38.7097
37	44.0476	0.171	98.74	49.3333	0	88.7669	40.2174	3.861	66.2259	37	3.5558	116.809	47.4359	6.481	142.563	44.0476	3.147	81.781	48.0519	0	110.156	43.5294	0	84.887	45.122	1.132	73.071	41.1111	9.662	113.906	46.8354	2.024	105.195	61.6667	0	90.895	45.122	0	71.511	50.6849	0	33.2776	53.6232	0	94.542	52.1127	0	75.7883	39.7849
38	45.2381	0.042	99.621	50.6667	0	88.4706	41.3043	2.773	62.1044	38	3.6187	109.232	48.7179	3.439	144.98	45.2381	4.543	79.043	49.3506	0	118.022	44.7059	0	73.18	46.3415	1.983	74.052	42.2222	4.643	115.845	48.1013	2.974	112.805	63.3333	0	90.39	46.3415	0	70.867	52.0548	0	34.7234	55.0725	0	99.469	53.5211	0	76.5406	40.8602
39	46.4286	0	98.562	52	0.152	86.8967	42.3913	2.411	62.7298	39	3.0494	101.555	50	1.766	141.299	46.4286	5.813	79.833	50.6494	0	128.363	45.8824	0	70.826	47.561	1.667	75.664	43.3333	1.322	106.908	49.3671	3.428	120.711	65	0	88.245	47.561	0	73.418	53.4247	0	35.4376	56.5217	0	102.186	54.9296	0	79.4613	41.9355
40	47.619	0	95.529	53.3333	1.175	85.9939	43.4783	2.168	69.4193	40	2.3478	96.09	51.2821	1.09	133.207	47.619	3.68	79.766	51.9481	0	141.801	47.0588	0	77.444	48.7805	0.404	75.401	44.4444	0.063	103.113	50.6329	3.407	131.617	66.6667	0	84.466	48.7805	0	76.953	54.7945	0	37.123	57.971	0	103.624	56.338	0	86.9821	43.0108
41	48.8095	0	93.332	54.6667	2.74	88.097	44.5652	1.229	74.1453	41	1.3884	89.827	52.5641	2.013	119.464	48.8095	1.288	79.93	53.2468	0	144.21	48.2353	0	82.136	50	0.004	74.91	45.5556	0.403	101.68	51.8987	3.032	133.12	68.3333	0	77.121	50	0	78.332	56.1644	0	38.7143	59.4203	0.205	101.725	57.7465	0	95.2335	44.086
42	50	0	92.561	56	3.87	89.8184	45.6522	1	81.0273	42	1	83.373	53.8462	2.339	119	50	0	80.199	54.5455	0	140.984	49.4118	0	81.363	51.2195	0	79.937	46.6667	0.891	104.814	53.1646	3.189	132.977	70	0.879	70.394	51.2195	0	81.805	57.5342	0	39.0265	60.8696	0.991	98.038	59.1549	0	98.648	45.1613
43	51.1905	0	91.353	57.3333	4.295	89.0896	46.7391	0.386	83.962	43	0.4589	83.526	55.1282	2.064	118.785	51.1905	0	79.655	55.8442	0	128.044	50.5882	0	83.384	52.439	0	83.544	47.7778	2.108	105.237	54.4304	3.068	132.169	71.6667	6.315	67.483	52.439	0	88.891	58.9041	0	38.4064	62.3188	4.828	96.766	60.5634	0	98.4108	46.2366
44	52.381	0	89.722	58.6667	3.666	89.5819	47.8261	0.535	85.129	44	0	89.081	56.4103	4.231	113.31	52.381	0	75.752	57.1429	0	111.724	51.7647	0	84.387	53.6585	0	85.293	48.8889	2.853	103.307	55.6962	2.198	128.891	73.3333	23.119	65.935	53.6585	0	88.253	60.274	0	36.2172	63.7681	12.473	102.625	61.9718	0	99.4682	47.3118
45	53.5714	0	91.048	60	1.622	89.4807	48.913	1.686	82.3217	45	0	93.897	57.6923	6.17	112.558	53.5714	0	74.278	58.4416	0.094	100.502	52.9412	0	88.433	54.878	0	88.374	50	3.013	104.503	56.962	1.227	130.212	75	54.791	65.419	54.878	0	89.116	61.6438	0	33.5887	65.2174	23.392	105.051	63.3803	0	97.8795	48.3871
46	54.7619	0	91.523	61.3333	0.078	87.5722	50	3.648	77.4943	46	0	96.353	58.9744	5.043	111.582	54.7619	0	77.936	59.7403	0	96.011	54.1176	0	95.485	56.0976	0	88.439	51.1111	2.447	106.982	58.2278	0.226	125.556	76.6667	90.403	67.753	56.0976	0	91.133	63.0137	0	31.0395	66.6667	32.58	102.107	64.7887	0	93.3692	49.4624
47	55.9524	0	92.233	62.6667	0.004	85.2237	51.087	6.375	71.3967	47	0	94.665	60.2564	2.14	107.047	55.9524	0	83.118	61.039	0	94.818	55.2941	0	94.83	57.3171	0	84.681	52.2222	1.979	105.673	59.4937	0	116.849	78.3333	116.679	69.767	57.3171	0	89.752	64.3836	0	28.606	68.1159	33.662	94.062	66.1972	1.4	89.2949	50.5376
48	57.1429	0	95.429	64	0	85.1881	52.1739	9.036	66.2818	48	0	88.455	61.5385	0.485	106.881	57.1429	0	88.774	62.3377	0	93.102	56.4706	0	88.214	58.5366	0	81.795	53.3333	0.973	109.874	60.7595	0	116.727	80	137.167	68.232	58.5366	0	83.918	65.7534	0	28.2303	69.5652	33.793	82.933	67.6056	8.537	83.955	51.6129
49	58.3333	0	95.617	65.3333	0	89.1954	53.2609	9.768	64.3939	49	0	84.185	62.8205	0.628	106.381	58.3333	0	95.075	63.6364	0.162	93.025	57.6471	0	86.831	59.7561	0	79.539	54.4444	1.513	118.299	62.0253	0	117.088	81.6667	151.752	65.911	59.7561	0	76.899	67.1233	0	29.5529	71.0145	33.002	71.472	69.0141	29.027	77.798	52.6882
50	59.5238	0	96.721	66.6667	0	92.774	54.3478	7.791	66.3317	50	0	84.614	64.1026	6.016	104.074	59.5238	0	95.014	64.9351	0.829	90.658	58.8235	0	85.901	60.9756	0	79.303	55.5556	3.994	124.343	63.2911	0	113.704	83.3333	160.468	66.872	60.9756	0	73.019	68.4932	0	31.2749	72.4638	37.887	68.651	70.4225	67.846	73.6392	53.7634
51	60.7143	0	97.313	68	0	95.7481	55.4348	4.343	70.0775	51	0	88.28	65.3846	22.007	99.836	60.7143	0	86.385	66.2338	2.575	91.398	60	0	83.669	62.1951	0	81.453	56.6667	7.376	128.176	64.557	0	113.595	85	164.628	73.694	62.1951	0	72.927	69.863	0	33.8593	73.913	47.585	69.251	71.831	112.429	71.2041	54.8387
52	61.9048	0	94.384	69.3333	0	101.202	56.5217	1.97	69.7983	52	0	90.462	66.6667	51.259	104.961	61.9048	0	80.048	67.5325	7.557	94.529	61.1765	0	81.7	63.4146	0	87.168	57.7778	7.913	127.28	65.8228	0	117.496	86.6667	156.307	83.478	63.4146	0	76.436	71.2329	0	37.3717	75.3623	69.221	71.802	73.2394	138.243	69.1028	55.914
53	63.0952	0	89.964	70.6667	0	109.788	57.6087	1	68.3485	53	0	95.302	67.9487	74.017	106.272	63.0952	0	74.704	68.8312	14.226	96.844	62.3529	0	81.339	64.6341	0	93.587	58.8889	4.702	126.674	67.0886	0	117.408	88.3333	130.715	89.818	64.6341	0	80.72	72.6027	0	39.5506	76.8116	101.524	73.193	74.6479	140.082	68.9828	56.9892
54	64.2857	0	82.507	72	0	111.802	58.6957	1.172	71.376	54	0	100.153	69.2308	88.387	105.874	64.2857	0	68.565	70.1299	29.023	96.29	63.5294	0	83.009	65.8537	0.229	92.938	60	0.828	130.599	68.3544	0	110.725	90	94.711	87.411	65.8537	0	84.534	73.9726	0.611	40.807	78.2609	139.97	73.982	76.0563	133.424	69.8145	58.0645
55	65.4762	1.699	76.377	73.3333	0	112.624	59.7826	1.287	75.3588	55	0	102.266	70.5128	113.15	106.551	65.4762	0	66.033	71.4286	57.304	94.463	64.7059	0	82.796	67.0732	1.178	86.832	61.1111	0	134.352	69.6203	0	104.018	91.6667	66.984	81.423	67.0732	0	89.611	75.3425	5.566	41.6533	79.7101	169.613	76.635	77.4648	121.506	70.6701	59.1398
56	66.6667	8.199	73.221	74.6667	0.667	106.769	60.8696	1.346	73.6684	56	0	103.66	71.7949	132.896	103.039	66.6667	0.002	65.996	72.7273	110.678	88.748	65.8824	0	87.588	68.2927	2.216	77.755	62.2222	0	133.424	70.8861	0	99.235	93.3333	39.191	78.601	68.2927	0.026	90.793	76.7123	20.264	41.3495	81.1594	180.982	89.154	78.8732	101.401	70.891	60.2151
57	67.8571	21.409	69.59	76	7.376	93.9158	61.9565	0.673	68.9999	57	0	108.722	73.0769	142.901	96.381	67.8571	0.558	70.649	74.026	172.624	77.525	67.0588	0.833	95.925	69.5122	4.354	68.071	63.3333	0	125.326	72.1519	0	92.913	95	19.12	75.305	69.5122	0.889	84.247	78.0822	46.262	42.8642	82.6087	163.947	101.42	80.2817	75.044	71.562	61.2903
58	69.0476	38.752	68.361	77.3333	26.881	79.2287	63.0435	0.099	70.0154	58	0	120.358	74.359	144.691	92.417	69.0476	3.826	80.259	75.3247	195.14	69.039	68.2353	5.833	98.76	70.7317	9.491	68.254	64.4444	0	119.557	73.4177	1.564	86.612	96.6667	8.06	70.045	70.7317	5.902	73.053	79.4521	77.559	40.2951	84.058	128.451	113.958	81.6901	46.377	72.1382	62.3656
59	70.2381	59.183	69.555	78.6667	59.666	66.6648	64.1304	0	70.7838	59	0	125.894	75.641	144.822	89.676	70.2381	10.992	87.028	76.6234	152.223	69.611	69.4118	19.179	97.809	71.9512	16.131	64.462	65.5556	0	117.538	74.6835	9.055	81.16	98.3333	2.371	70.096	71.9512	22.84	64.537	80.8219	117.659	32.9517	85.5072	97.25	118.863	83.0986	23.727	70.7857	63.4409
60	71.4286	88.689	71.233	80	90.393	62.6305	65.2174	0	70.6377	60	0	113.269	76.9231	138.273	92.962	71.4286	22.581	86.392	77.9221	80.954	72	70.5882	47.978	93.457	73.1707	22.498	59.518	66.6667	0	115.873	75.9494	26.199	76.241	100	0.775	67.365	73.1707	54.929	54.051	82.1918	147.162	28.2687	86.9565	81.203	115.485	84.507	10.686	71.1353	64.5161
61	72.619	123.035	72.575	81.3333	112.345	66.9937	66.3043	0	69.7513	61	0	97.051	78.2051	142.471	98.972	72.619	33.952	82.739	79.2208	28.256	72.201	71.7647	92.094	89.851	74.3902	30.789	55.925	67.7778	0	113.896	77.2152	52.814	72.014				74.3902	100.866	46.553	83.5616	160.127	26.627	88.4058	69.073	115.292	85.9155	4.48	72.2432	65.5914
62	73.8095	143.526	74.87	82.6667	119.221	73.7749	67.3913	0	73.7737	62	0	82.709	79.4872	130.44	101.31	73.8095	53.3	79.253	80.5195	9.929	74.88	72.9412	130.463	89.759	75.6098	59.131	53.647	68.8889	0	110.913	78.481	85.987	72.632				75.6098	151.035	42.011	84.9315	173.062	28.8258	89.8551	49.333	116.724	87.3239	1.698	72.339	66.6667
63	75	141.101	79.203	84	121.659	83.3482	68.4783	0	78.0525	63	0	77.585	80.7692	92.654	101.67	75	69.884	72.364	81.8182	3.43	79.788	74.1176	161.284	84.723	76.8293	99.072	50.777	70	0.539	109.501	79.7468	118.727	80.124				76.8293	191.037	39.07	86.3014	189.368	32.1807	91.3043	29.307	111.732	88.7324	0.369	68.9279	67.7419
64	76.1905	122.974	85.132	85.3333	116.077	90.7427	69.5652	0	76.4002	64	0	79.586	82.0513	50.272	99.51	76.1905	81.076	64.92	83.1169	0.551	90.22	75.2941	181.1	82.739	78.0488	110.306	47.137	71.1111	5.436	99.107	81.0127	147.547	86.407				78.0488	200.148	37.54	87.6712	188.586	35.9035	92.7536	14.134	112.639	90.1408	0	63.0717	68.8172
65	77.381	96.343	91.413	86.6667	91.91	96.298	70.6522	0.422	73.7282	65	0	91.022	83.3333	19.824	96.086	77.381	86.834	65.248	84.4156	0	99.751	76.4706	185.71	82.156	79.2683	96.679	45.408	72.2222	17.866	85.058	82.2785	178.739	95.994				79.2683	172.668	35.805	89.0411	155.489	40.7009	94.2029	4.223	113.634	91.5493	0	60.7353	69.8925
66	78.5714	67.049	96.171	88	58.791	101.09	71.7391	1.949	71.5031	66	0	105.763	84.6154	5.168	92.269	78.5714	100.75	68.073	85.7143	0	109.095	77.6471	177.062	79.19	80.4878	82.651	45.979	73.3333	54.19	78.983	83.5443	194.936	102.261				80.4878	129.704	36.338	90.411	97.025	43.3547	95.6522	0.388	100.864	92.9577	0	61.8842	70.9677
67	79.7619	39.033	99.921	89.3333	28.038	106.984	72.8261	6.188	69.185	67	0	120.882	85.8974	0.033	91.246	79.7619	113.085	73.378	87.013	0.212	116.676	78.8235	156.088	78.55	81.7073	76.074	48.284	74.4444	100.203	79.99	84.8101	181.327	105.464				81.7073	85.243	41.998	91.7808	46.37	43.8486	97.1014	0	89.722	94.3662	0	65.6583	72.043
68	80.9524	17.075	102.655	90.6667	11.058	107.559	73.913	14.704	66.5601	68	0	127.532	87.1795	0.104	97.827	80.9524	94.992	73.568	88.3117	0.66	115.244	80	125.816	79.757	82.9268	63.626	52.725	75.5556	139.43	85.061	86.0759	128.447	101.994				82.9268	47.709	50.681	93.1507	17.416	43.5942	98.5507	0	87.155	95.7746	0	74.9179	73.1183
69	82.1429	5.325	103.794	92	3.072	110.584	75	29.127	63.7678	69	0	120.719	88.4615	1.056	101.263	82.1429	57.592	74.63	89.6104	0.787	105.37	81.1765	94.147	81.428	84.1463	43.013	56.903	76.6667	142.994	89.978	87.3418	62.634	97.986				84.1463	24.87	58.072	94.5205	6.6	42.2244	100	0	88.539	97.1831	0	84.4473	74.1935
70	83.3333	1.365	101.416	93.3333	0.523	106.345	76.087	48.63	63.5447	70	0	107.913	89.7436	3.446	100.388	83.3333	21.225	80.049	90.9091	0	93.582	82.3529	66.755	88.713	85.3659	26.004	58.16	77.7778	113.623	94.106	88.6076	19.71	96.11				85.3659	13.865	65.988	95.8904	2.537	39.5675				98.5915	0	86.6689	75.2688
71	84.5238	1.108	99.284	94.6667	0	103.949	77.1739	70.885	63.7688	71	0.1629	91.837	91.0256	4.492	105.341	84.5238	6.517	84.983	92.2078	0	90.021	83.5294	50.487	101.939	86.5854	13.1	57.096	78.8889	75.387	96.659	89.8734	3.781	100.456				86.5854	8.053	72.918	97.2603	0.685	37.6289				100	0	81.0899	76.3441
72	85.7143	1.176	99.403	96	0	100.584	78.2609	84.336	63.1415	72	3.2758	73.867	92.3077	3.686	105.372	85.7143	1.292	86.534	93.5065	0	96.462	84.7059	33.491	110.545	87.8049	4.583	60.558	80	39.41	103.563	91.1392	0	111.454				87.8049	4.99	77.69	98.6301	0	38.2792							77.4194
73	86.9048	0.955	98.284	97.3333	0	98.7307	79.3478	94.606	63.8537	73	12.2902	58.897	93.5897	1.994	107.328	86.9048	0.152	85.865	94.8052	0	94.461	85.8824	20.698	115.633	89.0244	0.797	67.279	81.1111	16.207	113.329	92.4051	0	118.365				89.0244	3.186	78.31	100	0	38.9405							78.4946
74	88.0952	0	97.074	98.6667	0	92.2342	80.4348	101.079	65.3663	74	27.1005	51.148	94.8718	0.831	118.049	88.0952	0	82.408	96.1039	0	97.428	87.0588	11.789	112.992	90.2439	0	72.104	82.2222	4.533	124.118	93.6709	0	121.765				90.2439	1.67	80.725										79.5699
75	89.2857	0	92.845	100	0	83.096	81.5217	115.633	68.4871	75	37.5955	51.023	96.1538	0.565	125.436	89.2857	0	83.173	97.4026	0.122	101.076	88.2353	5.721	109.974	91.4634	0	73.622	83.3333	0.772	130.334	94.9367	0	121.907				91.4634	0.211	86.952										80.6452
76	90.4762	0	90.059				82.6087	133.438	72.2235	76	41.2725	54.124	97.4359	1	122.245	90.4762	0	89.229	98.7013	0.362	98.493	89.4118	2.06	107.506	92.6829	0	72.495	84.4444	0	129.801	96.2025	0	122.379				92.6829	0	89.838										81.7204
77	91.6667	0	91.162				83.6957	151.491	72.723	77	37.8468	62.105	98.7179	1.083	115.102	91.6667	0	92.307	100	0.199	88.404	90.5882	0.581	100.304	93.9024	0	71.422	85.5556	0	124.206	97.4684	0	119.337				93.9024	0	90.822										82.7957
78	92.8571	0	94.746				84.7826	180.789	73.2854	78	33.3438	74.955	100	1.974	105.286	92.8571	0	91.864				91.7647	0	96.614	95.122	0	67.774	86.6667	0	119.656	98.7342	0	115.63				95.122	0	87.287										83.871
79	94.0476	0	93.567				85.8696	204.168	74.2258	79	28.5408	90.397				94.0476	0	89.147				92.9412	0	91.903	96.3415	0	68.007	87.7778	0	120.223	100	0	105.029				96.3415	0	90.411										84.9462
80	95.2381	0	89.54				86.9565	216.424	79.2429	80	24.9942	104.894				95.2381	0	85.78				94.1176	0	92.032	97.561	0	74.233	88.8889	0	128.594							97.561	0	94.918										86.0215
81	96.4286	0	87.83				88.0435	194.317	83.1617	81	23.7886	117.038				96.4286	0	80.982				95.2941	0	100.586	98.7805	0	74.684	90	0	132.097							98.7805	0.064	92.728										87.0968
82	97.619	0	82.484				89.1304	129.9	84.3603	82	25.5037	121.15				97.619	0	81.107				96.4706	0	97.468	100	0	79.784	91.1111	0	130.746							100	0.771	79.767										88.172
83	98.8095	0.011	74.956				90.2174	66.901	91.818	83	23.7681	121.695				98.8095	0	83.404				97.6471	0	93.604				92.2222	0	128.865																			89.2473
84	100	0.671	63.335				91.3043	27.853	92.3492	84	16.5569	122.04				100	0	80.398				98.8235	0	87.612				93.3333	0	131.88																			90.3226
85							92.3913	9.416	87.7301	85	7.1928	121.323										100	0	78.425				94.4444	0	135.016																			91.3978
86							93.4783	2.416	85.8699	86	2.5258	112.058																95.5556	0	138.657																			92.4731
87							94.5652	0.371	89.9746	87	1.7962	99.635																96.6667	0	138.039																			93.5484
88							95.6522	0	92.2337	88	1.361	89.33																97.7778	0	138.658																			94.6237
89							96.7391	0	96.6293	89	1.002	83.421																98.8889	0.034	128.999																			95.6989
90							97.8261	0	94.269	90	0.6431	84.5																100	0.919	112.921																			96.7742
91							98.913	0	89.5949	91	0.2841	87.685																																					97.8495
92							100	0	84.2413	92	0	88.786																																					98.9247
93										93	0	85.21																																					100
94										94	0	81.693
95										95	0	78.293
96										96	0	76.194
97										97	0	77.875
98										98	0	80.595
99										99	0	81.803
100										100	0	75.097
	0			0			0			0			0			0			0			0			0			0			0			0			0			0			0			0			0
	5	1.4034	186.227	5	7.8775	149.471	5	4.697	139.87	5	1.53462	196.61	5	14.8625	195.161	5	1.7972	191.228	5	1.24375	208.967	5	1.0624	207.641	5	2.031	175.388	5	1	217.35	5	1.52875	196.084	5	3.8215	185.388	5	1.9486	205.224	5	5.74475	76.1267	5	2.86975	167.384	5	0.26275	117.028	5
	10	1.251	150.904	10	0.38725	97.4493	10	6.2976	130.828	10	1.10283	178.346	10	8.188	168.244	10	2.88675	156.733	10	1.379	159.617	10	6.81825	127.602	10	2.40475	108.756	10	4.615	178.436	10	0.2085	125.745	10	3.31525	139.972	10	3.05875	177.268	10	11.2025	70.6673	10	4.04067	172.345	10	2.3345	98.537	10
	15	1.272	101.995	15	0	81.0803	15	2.557	84.1723	15	0.774717	108.482	15	1.89125	113.242	15	7.13225	99.9457	15	1.328	111.254	15	5.09875	63.8815	15	1.66025	61.577	15	3.4398	121.601	15	1.0825	84.7922	15	5.4955	82.1125	15	1.357	105.864	15	3.612	39.4633	15	2.96375	132.935	15	4.86633	69.421	15
	20	1	87.287	20	0.44225	74.6253	20	3.6366	69.2532	20	0.28295	79.6105	20	1.5455	110.138	20	0.32075	73.0998	20	1	92.8072	20	0.4474	78.225	20	1.2555	67.6365	20	3.9468	110.051	20	4.7	98.964	20	2.084	65.3085	20	0.03275	62.7713	20	2.0375	27.5911	20	1.52133	80.2943	20	0.71975	61.9818	20
	25	0.4496	74.908	25	3.5815	72.7707	25	4.3154	72.3522	25	3.45487	75.0327	25	1.28	99.1475	25	0	80.4856	25	1.1905	91.229	25	0.7066	92.9332	25	3.14525	64.6258	25	2.8124	123.621	25	6.906	138.704	25	0.12475	59.6513	25	1.1425	74.4663	25	0.78075	29.5233	25	0.64475	77.5192	25	2.30767	75.3205	25
	30	0.7624	75.9764	30	3.96225	74.8592	30	1.044	83.2485	30	1.83067	91.609	30	2.42875	121.734	30	0	80.003	30	4.25325	118.742	30	1.68875	93.5343	30	1.52425	58.645	30	4.3996	95.407	30	3.99225	110.84	30	0.04075	64.255	30	2.97975	81.6137	30	0.004	33.9769	30	1.57333	81.8433	30	3.36125	70.1058	30
	35	1.1025	84.8495	35	0.81075	92.2257	35	3.725	75.3658	35	0.670883	120.696	35	3.94625	136.607	35	1.112	85.1328	35	2.24667	123.705	35	1.7275	101.015	35	1	70.938	35	1.3574	104.107	35	1.433	101.705	35	0.42675	63.3157	35	1.58	85.9518	35	0.9355	36.48	35	6.14375	92.8312	35	0.043	66.35	35
	40	0.14325	82.9322	40	1.44	93.5203	40	12.3102	79.9763	40	2.55878	110.963	40	15.1753	129.286	40	3.881	76.7798	40	5.51275	102.53	40	0.451	104.647	40	1.20225	76.3203	40	9.775	105.895	40	3.4415	107.353	40	1.008	74.6665	40	0.04825	69.816	40	0.81825	38.7401	40	10.5413	95.042	40	0	70.7007	40
	45	0.36525	96.248	45	0.87425	89.3845	45	2.4884	66.9249	45	0.86585	89.299	45	7.97275	116.215	45	1.966	86.25	45	2.022	95.7482	45	0	93.4834	45	0.11375	77.3113	45	6.0136	109.921	45	2.0795	114.216	45	1.5585	75.8757	45	0	67.2332	45	1.43533	36.792	45	3.002	94.7178	45	0	71.5297	45
	50	0.0084	95.921	50	0	88.3499	50	1.451	81.9869	50	0	90.3615	50	5.22775	140.896	50	3.0648	79.7542	50	0.00475	107.877	50	0	77.9423	50	1.038	74.6196	50	1.8536	103.908	50	2.429	111.321	50	1.62125	68.1577	50	0	74.2162	50	0.05725	31.7014	50	1.72633	80.7047	50	0	68.0201	50
	55	0	91.2414	55	1.01675	87.3645	55	7.3236	69.1797	55	0	93.5128	55	1.802	128.243	55	0	77.564	55	0	138.84	55	0	87.9223	55	0.0008	82.4116	55	1.985	109.066	55	3.174	132.471	55	1.7485	85.537	55	0	85.2794	55	0	35.1404	55	0.169333	89.6813	55	0	76.5856	55
	60	0	95	60	3.36325	89.4927	60	1.9544	70.9918	60	0	112.361	60	4.377	114.059	60	0	90.4952	60	0.0235	109.07	60	0	87.889	60	0	83.6135	60	4.9626	127.414	60	0.91275	125.377	60	1.33375	89.4428	60	0	85.4255	60	0	38.7157	60	0.05125	101.751	60	0	93.6212	60
	65	0	91.042	65	0.426	86.8662	65	0.5295	70.8669	65	0	90.2037	65	2.31725	106.096	65	0	77.4255	65	0.24775	92.9008	65	0	82.5026	65	0	85.3778	65	0.1656	128.652	65	0	115.279	65	0	89.88	65	0	75.7755	65	0	32.3629	65	6.09733	99.143	65	0	97.2819	65
	70	17.5147	71.8873	70	0	94.7299	70	0	73.7231	70	0	112.305	70	58.9175	104.236	70	1.0965	70.7343	70	8.11933	94.257	70	6.46125	95.0205	70	1.99425	81.399	70	0.1078	113.544	70	0	112.412	70	0.21975	80.0565	70	0.22875	87.2963	70	0	30.7293	70	30.8567	96.0383	70	12.988	83.6826	70
	75	111.107	73.4872	75	0.16675	110.246	75	10.478	68.9488	75	13.4042	72.4475	75	133.41	99.597	75	38.1418	81.5552	75	92.4073	89.2565	75	107.955	89.4475	75	19.7273	62.0397	75	35.6468	90.5278	75	2.65475	89.98	75	21.276	67.3077	75	46.1343	59.5485	75	0.203667	39.2431	75	39.4913	69.7913	75	114.65	70.7322	75
	80	93.3	90.368	80	46.079	75.6099	80	65.5168	63.6153	80	33.9323	72.9163	80	139.002	95.73	80	90.3258	68.7966	80	114.143	70.7127	80	165.155	80.4784	80	91.297	49.2422	80	102.169	93.8734	80	70.9317	75.2527	80	99.76	67.7927	80	178.722	38.6065	80	37.4128	41.5405	80	120.082	73.903	80	118.777	70.4585	80
	85	6.21825	101.787	85	110.904	71.6868	85	136.486	70.4171	85	20.3007	118.023	85	41.9795	97.3838	85	45.0815	78.3075	85	3.4775	86.1598	85	74.1392	92.4764	85	66.341	50.9727	85	12.1844	120.229	85	175.637	97.5315	85	153.504	68.6773	85	71.8815	46.7722	85	149.502	29.1683	85	157.793	101.511	85	38.9585	71.4053	85
	90	0.53275	96.9015	90	73.704	98.7784	90	186.202	80.2477	90	2.42015	98.3778	90	1.15975	97.681	90	0.361	84.495	90	0.41475	111.596	90	10.067	111.526	90	11.121	60.7732	90	0	124.955	90	53.643	99.1365	90	136.59	83.6003	90	7.5235	73.7265	90	177.814	36.2617	90	74.2148	116.591	90	2.18233	71.17	90
	95	0	92.3835	95	3.66325	107.109	95	21.3914	89.5484	95	0.154533	84.3612	95	2.75075	109.023	95	0	90.6367	95	0	93.6315	95	0.14525	95.2133	95	0	72.4108	95	0	131.721	95	0	118.373	95	55.0015	80.685	95	0.47025	87.0842	95	41.8528	43.2555	95	15.888	112.668	95	0	62.8374	95
	100	0.1364	79.629	100	0	93.6612	100	0	91.3936	100	0	78.3095	100	1.1555	117.017	100	0	82.3342	100	0.17075	96.3502	100	0	91.539	100	0	72.8964	100	0.1906	131.455	100	0	115.594	100	7.5815	70.7028	100	0.167	89.0222	100	0.8055	38.604	100	0.097	91.57	100	0	81.781	100
[truncated: 29 more columns]

## Sheet: Summary
	FISH	PI	FISH	PI	FISH	PI
	Mean	Mean	STDDEV	STDDEV	SEM	SEM
5	2.91169	168.564	2.99831	42.8014	0.612027	8.7368
10	3.38654	134.82	2.80666	39.5302	0.572908	8.06906
15	3.08501	86.116	3.68593	29.0888	0.752388	5.93772
20	1.78057	72.5428	1.70475	21.5026	0.34798	4.38921
25	2.38073	75.4274	2.01921	26.1878	0.412169	5.34556
30	2.16019	77.6241	1.73781	24.9728	0.354729	5.09755
35	1.8422	81.9288	1.39792	28.0219	0.285349	5.71995
40	3.40979	81.0354	4.17019	25.0906	0.851237	5.1216
45	1.65831	80.8854	2.07768	23.9778	0.424104	4.89445
50	1.37385	80.6648	1.89065	25.5551	0.385928	5.21642
55	0.985219	84.8513	1.69204	28.4215	0.345387	5.80152
60	1.16148	85.7456	2.24218	27.9096	0.457683	5.69702
65	1.23774	81.6796	2.82815	25.3975	0.577294	5.18424
70	9.99878	80.8482	16.1942	23.9145	3.30562	4.88153
75	55.2999	73.2003	50.5223	20.6011	10.3128	4.20518
80	108.329	67.2823	50.0922	18.7788	10.225	3.8332
85	97.865	74.8215	60.9123	26.8585	12.4337	5.48247
90	46.1255	84.1069	55.1387	25.6371	11.2551	5.23315
95	8.26149	84.9016	15.6986	24.8733	3.20446	5.07723
100	0.525863	82.4814	1.53692	24.1645	0.313722	4.93256
