# Supplementary material for: Large domains of heterochromatin direct the formation of short mitotic chromosome loops
Source: eLife. 2020 Sep 11;9:e57212. doi: 10.7554/eLife.57212 (PMC7515631; doi:10.7554/eLife.57212)
Supplement: Figure 5—source data 5. [file elife-57212-fig5-data5.xlsx]

## Sheet: All
1	FISH		PI	2	FISH		PI	3	FISH		PI	4	FISH		PI	5	FISH		PI	6	FISH		PI	7	FISH		PI	9	FISH		PI	10	FISH		PI	11	FISH		PI	12	FISH		PI	13	FISH		PI	14	FISH
X	Y	X	Y	X	Y	X	Y	X	Y	X	Y	X	Y	X	Y	X	Y	X	Y	X	Y	X	Y	X	Y	X	Y	X	Y	X	Y	X	Y	X	Y	X	Y	X	Y	X	Y	X	Y	X	Y	X	Y	X	Y
0	7	0	152	0	11	0	166	0	6	0	146	0	8	0	130	0	7	0	151	0	9	0	217	0	5	0	171	0	3	0	196	0	4	0	164	0	8	0	177	0	8	0	185	0	5	0	175	0	14
1	6.574	1	160.61	1	9.654	1	171.796	1	7.883	1	145.247	1	8.632	1	137.606	1	6.431	1	164.522	1	9.708	1	225.165	1	4.265	1	174.631	1	3.212	1	202.565	1	4.914	1	175.27	1	7.846	1	177.483	1	7.082	1	190.022	1	5.096	1	187.976	1	14.985
2	6.838	2	164.489	2	8.308	2	176.812	2	8.789	2	137.528	2	8.368	2	148.201	2	6.644	2	173.336	2	8.777	2	229.189	2	4.029	2	170.213	2	3.973	2	203.05	2	7.328	2	183.643	2	6.808	2	173.546	2	6.9	2	200.644	2	5.12	2	188.53	2	14.06
3	7.714	3	163.736	3	8	3	179.215	3	9.342	3	127.376	3	8.854	3	156.622	3	6.533	3	175.605	3	7.259	3	216.9	3	4.662	3	167.269	3	4.28	3	197.127	3	9.483	3	184.034	3	6.857	3	174.872	3	7.054	3	209.423	3	5.68	3	183.882	3	11.683
4	8.619	4	160.752	4	8	4	175.058	4	10.033	4	119.468	4	9.53	4	155.67	4	6.831	4	177.241	4	6.065	4	193.839	4	4.97	4	163.451	4	4.855	4	184.383	4	10	4	175.137	4	9.485	4	182.106	4	6.681	4	201.258	4	6.239	4	173.143	4	8.418
5	9.456	5	158.465	5	8.514	5	169.993	5	9.764	5	115.695	5	11.338	5	151.454	5	8.555	5	175.805	5	4.999	5	170.764	5	6.276	5	162.308	5	5.085	5	165.162	5	10	5	167.261	5	14.015	5	180.608	5	6.935	5	196.897	5	6.799	5	170.174	5	6.267
6	9.492	6	151.306	6	9.441	6	165.218	6	9.201	6	111.5	6	14.005	6	150.361	6	10.218	6	172.43	6	5.092	6	150.999	6	8.479	6	156.254	6	5.9	6	155.118	6	9.728	6	157.82	6	19.923	6	172.276	6	7.507	6	183.323	6	7.349	6	167.564	6	5.626
7	9.974	7	141.1	7	9.721	7	159.241	7	8.416	7	102.057	7	15.931	7	150.31	7	13.464	7	165.656	7	4.507	7	136.703	7	11.134	7	149.463	7	8.068	7	145.389	7	9.112	7	149.28	7	22.471	7	162.784	7	8.509	7	174.276	7	7.984	7	164.13	7	5.063
8	9.355	8	127.764	8	10.863	8	151.057	8	7.333	8	90.5115	8	15.074	8	146.632	8	16.902	8	159.43	8	4.41	8	135.283	8	11.94	8	146.296	8	9.288	8	129.421	8	8	8	138.301	8	22.655	8	150.567	8	9.574	8	173.962	8	6.892	8	151.996	8	6.522
9	8.287	9	118.918	9	11.091	9	138.642	9	5.975	9	81.7508	9	13.699	9	136.342	9	19.674	9	156.583	9	4	9	135.583	9	11.915	9	143.49	9	9.095	9	115.211	9	7.698	9	131.156	9	19.871	9	137.368	9	10.54	9	165.163	9	6.077	9	142.035	9	7.548
10	8.448	10	112.772	10	10.155	10	122.993	10	5.528	10	77.2786	10	13.372	10	121.455	10	18.403	10	151.703	10	4.052	10	137.248	10	10.277	10	135.627	10	9.046	10	104.881	10	6.995	10	126.751	10	15.96	10	127.132	10	11.594	10	149.935	10	6.911	10	133.301	10	7.575
11	7.331	11	108.887	11	9.186	11	108.202	11	5.852	11	76.7971	11	13.554	11	108.865	11	15.606	11	144.547	11	5.378	11	129.928	11	7.876	11	127.743	11	9.207	11	98.667	11	6.617	11	118.725	11	11.001	11	117.655	11	11.59	11	136.096	11	7.317	11	125.859	11	7.109
12	6.033	12	106.411	12	8.379	12	97.5825	12	6.733	12	72.8452	12	11.905	12	99.0379	12	12.571	12	134.718	12	6.073	12	119.966	12	5.717	12	121.913	12	8.238	12	93.967	12	5.415	12	113.533	12	6.98	12	111.557	12	11.332	12	132.294	12	8.437	12	115.274	12	6.358
13	4.702	13	107.579	13	8.074	13	94.0274	13	7.628	13	71.3724	13	13.258	13	87.8908	13	8.997	13	132.804	13	7.648	13	109.577	13	4.938	13	120.429	13	6.911	13	93.234	13	4.279	13	110.287	13	6	13	109.59	13	10.768	13	131.085	13	10.05	13	102.778	13	5.402
14	4.013	14	113.543	14	8.637	14	96.4903	14	7.739	14	74.3699	14	15.843	14	80.545	14	7.489	14	130.625	14	9.293	14	103.936	14	5.023	14	123.515	14	5.33	14	89.918	14	4.087	14	118.535	14	6.404	14	106.902	14	9.974	14	120.276	14	10.335	14	95.544	14	4.594
15	3.779	15	120.558	15	9.895	15	99.4844	15	7.413	15	77.6625	15	15.795	15	82.1697	15	6.462	15	120.62	15	9.896	15	97.87	15	5.752	15	125.25	15	4.592	15	89.524	15	5.011	15	121.761	15	7.109	15	101.773	15	8.99	15	107.943	15	9.401	15	88.627	15	4.591
16	3.575	16	126.497	16	10.758	16	100.69	16	7.263	16	81.7009	16	14.904	16	77.3162	16	6.294	16	113.96	16	9.574	16	95.992	16	6	16	125.278	16	3.584	16	96.788	16	5.583	16	124.968	16	7.93	16	95.157	16	6.867	16	104.863	16	7.796	16	85.12	16	6
17	4	17	130.794	17	11.717	17	98.4774	17	7.316	17	87.2447	17	11.916	17	73.288	17	7.293	17	103.145	17	7.516	17	102.223	17	5.965	17	124.028	17	3	17	106.123	17	6.322	17	120.2	17	8.568	17	94.341	17	6.107	17	97.675	17	6.869	17	83.558	17	6.521
18	4.096	18	134.523	18	12.181	18	95.2473	18	6.9	18	86.5115	18	8.632	18	75.1542	18	8.353	18	96.954	18	5.835	18	110.641	18	5.273	18	120.708	18	3	18	106.579	18	6.942	18	118.444	18	8.15	18	93.891	18	5.937	18	93.514	18	5.171	18	84.476	18	7.746
19	4	19	136.973	19	11.148	19	97.4833	19	6.006	19	83.0177	19	7.71	19	81.0813	19	9.313	19	95.577	19	4.437	19	113.999	19	5	19	114.791	19	3.03	19	105.819	19	6.18	19	115.947	19	8.818	19	98.204	19	5.767	19	90.735	19	4.257	19	86.184	19	7.133
20	4	20	136.806	20	8.574	20	98.2133	20	5.111	20	82.9505	20	8.901	20	82.34	20	10.999	20	95.556	20	3.056	20	111.101	20	5.01	20	112.948	20	3.642	20	102.704	20	6.039	20	115.188	20	9.86	20	98.592	20	5.509	20	89.618	20	4.31	20	85.882	20	7.261
21	4.001	21	136.641	21	7.309	21	96.6306	21	5	21	77.5192	21	10.657	21	84.3258	21	13.173	21	94.189	21	1.641	21	111.512	21	5	21	107.673	21	4	21	102.104	21	7.326	21	123.716	21	9.648	21	91.545	21	5.955	21	93.625	21	6.315	21	87.709	21	6.843
22	4.573	22	129.017	22	6.983	22	96.5687	22	5	22	71.1489	22	11.919	22	91.0271	22	14.388	22	90.602	22	0.967	22	112.763	22	5.27	22	102.613	22	4.161	22	100.801	22	10.084	22	129.059	22	9.332	22	88.838	22	6.391	22	95.082	22	9.092	22	86.083	22	6.766
23	4.207	23	124.002	23	6.743	23	96.058	23	5	23	69.2448	23	10.519	23	95.7665	23	12.996	23	86.05	23	0.375	23	113.389	23	6	23	106.048	23	4.975	23	96.534	23	12.686	23	135.042	23	8.197	23	89.921	23	6	23	94.686	23	11.761	23	83.992	23	6.243
24	4	24	121.657	24	7.382	24	95	24	5	24	69.8395	24	7.901	24	101.694	24	10.213	24	87.419	24	0	24	113.118	24	6.027	24	107.171	24	4.977	24	95.334	24	15.515	24	134.215	24	7.274	24	92.629	24	6	24	101.019	24	11.613	24	86.022	24	7.218
25	3.6	25	116.938	25	8	25	95.9987	25	5	25	71.4279	25	6.03	25	102.041	25	7.89	25	92.559	25	0	25	113.049	25	7.015	25	106.014	25	5	25	96.027	25	16.938	25	131.347	25	8	25	99.259	25	7.098	25	106.127	25	9.574	25	85.731	25	7.251
26	3	26	111.094	26	8	26	99.2701	26	5.095	26	73	26	4.607	26	91.6363	26	6.547	26	98.663	26	0	26	111.249	26	8.001	26	104.427	26	4.361	26	97.08	26	15.962	26	131.707	26	8	26	96.911	26	8.021	26	110.456	26	6.56	26	84.138	26	5.885
27	3	27	105.354	27	7.701	27	103.835	27	4.925	27	73.7365	27	3.903	27	85.4931	27	5.874	27	105.825	27	0	27	110.755	27	8.624	27	106.505	27	3.073	27	97.78	27	15.19	27	132.19	27	8.684	27	93.19	27	8.164	27	111.517	27	4.299	27	85.252	27	4.708
28	2.691	28	102.431	28	7.94	28	110.978	28	4.457	28	77.5889	28	3.214	28	81.4469	28	5.938	28	106.456	28	0	28	112.8	28	9.555	28	104	28	2.512	28	98.849	28	14.97	28	131.329	28	9.487	28	89.286	28	8.962	28	109.763	28	3.876	28	89.451	28	3.891
29	2	29	102.586	29	7.368	29	115.741	29	4.002	29	79.8171	29	3.078	29	79.8519	29	6.507	29	102.739	29	0	29	113.159	29	9.884	29	99.936	29	2	29	97.117	29	13.564	29	131.746	29	10.01	29	86.381	29	8.175	29	111.869	29	5.287	29	91.108	29	2.999
30	2.145	30	105.334	30	7.676	30	116.319	30	3.93	30	77.0851	30	3	30	81.7028	30	7.026	30	104.258	30	0	30	110.919	30	9.046	30	95.721	30	2	30	99.263	30	10.222	30	130.453	30	10.229	30	91.337	30	6.58	30	116.14	30	6.829	30	87.529	30	2.499
31	3.15	31	111.267	31	7.409	31	115.306	31	4	31	73.4258	31	2.489	31	89.996	31	7	31	103.308	31	0	31	112.775	31	7.117	31	93.684	31	2	31	105.011	31	6.18	31	127.918	31	9.482	31	95.879	31	5.527	31	113.023	31	6.888	31	87.025	31	1.935
32	2.671	32	115.901	32	7	32	114.39	32	4	32	71.4203	32	2	32	98.047	32	7	32	103.423	32	0	32	113.44	32	6.071	32	92.936	32	2	32	107.135	32	2.814	32	126.918	32	9.963	32	103.04	32	5.138	32	110.694	32	6.485	32	90.204	32	1.15
33	2.2	33	123.669	33	7	33	117.376	33	4	33	68.1776	33	1.954	33	104.687	33	7	33	101.502	33	2.423	33	109.084	33	6	33	95.485	33	2	33	109.063	33	0.578	33	124.136	33	10.176	33	116.461	33	5.973	33	104.459	33	5.657	33	91.757	33	0.836
34	1.748	34	126.506	34	6.739	34	119.286	34	4	34	68.3314	34	1.23	34	110.215	34	7.403	34	98.75	34	13.293	34	105.894	34	6	34	97.07	34	2.724	34	116.357	34	0	34	121.994	34	10.226	34	121.43	34	6	34	105.643	34	5.006	34	89.278	34	0.212
35	1.032	35	127.718	35	6	35	118.758	35	4	35	70.9574	35	0.506	35	116.14	35	7.705	35	97.302	35	41.208	35	105.571	35	6	35	97.633	35	3	35	118.735	35	0	35	125.132	35	10.145	35	121.139	35	5.13	35	110.943	35	5.595	35	88.381	35	0
36	0.286	36	128.784	36	5.564	36	120.377	36	3.9	36	73.2758	36	0.474	36	121.186	36	7.338	36	97.368	36	82.137	36	104.97	36	5.97	36	103.249	36	3.437	36	116.703	36	0	36	130.024	36	9.55	36	122.76	36	3.931	36	113.344	36	6	36	92.588	36	0
37	0	37	126.35	37	5.009	37	124.608	37	3.359	37	80.9381	37	0.114	37	122.175	37	7.415	37	100.759	37	121.716	37	111.747	37	5.107	37	103.81	37	3.957	37	118.682	37	0	37	134.076	37	8.252	37	119.628	37	3.275	37	122.511	37	6	37	96.101	37	0
38	0	38	122.417	38	4.411	38	131.483	38	2.018	38	89.8823	38	0.455	38	118.275	38	6.908	38	107.461	38	155.979	38	115.251	38	4.704	38	109.91	38	2.375	38	116.795	38	0	38	137.023	38	5.805	38	117.483	38	3.507	38	133.822	38	6	38	100.705	38	0
39	0	39	120.074	39	2.73	39	140.12	39	1.559	39	86.028	39	0.236	39	121.726	39	5.056	39	111.04	39	181.745	39	120.836	39	4.078	39	114.719	39	0.685	39	118.091	39	0	39	138.516	39	3.165	39	118.525	39	4.35	39	134.664	39	6	39	103.014	39	0
40	0	40	116.766	40	1.163	40	150.357	40	0.334	40	84.765	40	1.998	40	117.74	40	3.26	40	113.409	40	198.698	40	129.345	40	3.169	40	113.186	40	0	40	125.09	40	0	40	135.985	40	1.076	40	124.956	40	5.289	40	132.446	40	5.519	40	105.366	40	0
41	0	41	114.342	41	0.157	41	157.098	41	0	41	84.8946	41	8.576	41	109.097	41	2.064	41	119.029	41	200.136	41	134.05	41	3	41	117.136	41	0	41	135.351	41	0	41	131.05	41	0.087	41	131.923	41	6.516	41	131.123	41	5.001	41	108.725	41	0
42	0	42	118.172	42	0	42	157.238	42	0	42	85.8576	42	22.122	42	107.603	42	0.621	42	124.768	42	200.084	42	130.584	42	3	42	124.364	42	0	42	141.151	42	0	42	128.095	42	0	42	130.627	42	8.362	42	136.979	42	3.296	42	112.062	42	0
43	0	43	123.071	43	0	43	156.453	43	0	43	87	43	42.746	43	109.501	43	0	43	128.176	43	213.767	43	125.772	43	2.344	43	127.968	43	0	43	144.869	43	0	43	124.17	43	0	43	122.47	43	11.165	43	144.05	43	2.417	43	111.362	43	0.057
44	0	44	129.567	44	0	44	152.219	44	0	44	85.5808	44	56.621	44	106.173	44	0	44	129.729	44	226.118	44	124.288	44	1.544	44	131.916	44	0	44	143.627	44	0	44	118.912	44	0	44	126.585	44	14.354	44	152.45	44	2.634	44	115.153	44	4.967
45	0	45	137.47	45	0.079	45	149.465	45	0	45	82.1277	45	59.556	45	100.799	45	0	45	125.137	45	213.026	45	115.691	45	0.823	45	132.151	45	0	45	145.753	45	1.679	45	119.923	45	0.325	45	122.025	45	16.708	45	160.369	45	3	45	118.731	45	21.307
46	0	46	147.988	46	1.856	46	149.055	46	0	46	79.2024	46	66.817	46	93.1557	46	0	46	117.276	46	165.936	46	108.323	46	0	46	126.36	46	0	46	141.681	46	7.266	46	120.728	46	1.912	46	122.634	46	20.542	46	163.378	46	3	46	113.981	46	46.991
47	0	47	152.561	47	13.126	47	148.469	47	0	47	76.9253	47	81.812	47	85.6119	47	0	47	107.356	47	115.778	47	106.312	47	0	47	124.36	47	0	47	132.583	47	17.72	47	120.147	47	9.504	47	117.268	47	27.916	47	154.083	47	3.567	47	115.433	47	72.053
48	0	48	157.462	48	32.406	48	146.103	48	0	48	76.0046	48	103.278	48	83.1599	48	0	48	96.209	48	68.649	48	103.686	48	0.169	48	118.921	48	0.563	48	126.77	48	32.707	48	117.89	48	25.323	48	110.294	48	36.198	48	142.026	48	3.882	48	120.459	48	94.657
49	0	49	159.157	49	51.278	49	137.663	49	0	49	72.9785	49	128.973	49	81.4621	49	0	49	95.066	49	35.054	49	104.256	49	0.192	49	114.908	49	3.279	49	122.48	49	50.637	49	112.261	49	55.136	49	110.008	49	46.86	49	139.235	49	4.024	49	124.623	49	113.246
50	1.559	50	159.284	50	63.17	50	126.715	50	0	50	68.7173	50	150.557	50	79.2046	50	0	50	98.366	50	17.351	50	106.57	50	0.515	50	115.825	50	8.47	50	120.172	50	70.935	50	101.973	50	88.675	50	114.021	50	59.266	50	147.191	50	2.865	50	120.195	50	128.491
51	7.147	51	154.666	51	70.242	51	116.186	51	0	51	65.7251	51	163.368	51	76.7325	51	0	51	100.173	51	9.27	51	110.622	51	0.276	51	117.881	51	18.923	51	116.858	51	93.353	51	93.8285	51	115.89	51	117.17	51	70.036	51	149.513	51	1.532	51	116.347	51	143.632
52	21.687	52	142.32	52	90.213	52	110.25	52	1.395	52	65.2181	52	174.28	52	73.9907	52	0	52	101.524	52	4.812	52	113.516	52	0.128	52	117.723	52	31.913	52	114.196	52	114.662	52	88.2557	52	133.157	52	118.748	52	75.363	52	153.901	52	0.198	52	115.381	52	153.906
53	47.704	53	130.463	53	124.451	53	106.142	53	7.742	53	63.4124	53	177.014	53	73.5337	53	0	53	98.195	53	1.999	53	112.848	53	0	53	117.334	53	53.808	53	111.218	53	136.755	53	86.4424	53	127.857	53	113.635	53	86.336	53	141.2	53	0.096	53	117.149	53	167.863
54	83.942	54	122.898	54	166.363	54	101.53	54	19.931	54	59.4616	54	176.755	54	78.2392	54	0	54	98.609	54	0.624	54	114.086	54	0.05	54	118.15	54	82.831	54	107.72	54	160.038	54	89.0408	54	133.794	54	110.261	54	97.055	54	134.533	54	0	54	119.482	54	185.386
55	112.91	55	118.792	55	195.836	55	96.9515	55	33.235	55	55.085	55	172.274	55	82.8781	55	1.614	55	97.998	55	0.079	55	115.723	55	0.177	55	116.129	55	112.873	55	102.384	55	178.553	55	93.8924	55	147.576	55	111.879	55	109.502	55	133.897	55	0.784	55	118.699	55	186.863
56	131.748	56	114.079	56	213.861	56	91.35	56	48.347	56	51.2595	56	173.21	56	85.7733	56	10.305	56	97.062	56	0	56	123.004	56	2.168	56	112.432	56	144.38	56	99.01	56	189.04	56	97.3908	56	156.143	56	99.307	56	114.802	56	133.228	56	6.476	56	111.923	56	178.191
57	147.636	57	109.683	57	211.116	57	89.1853	57	69.342	57	48.9169	57	169.241	57	92.2969	57	33.089	57	98.423	57	0	57	136.022	57	4.568	57	111.98	57	165.747	57	96.106	57	187.722	57	96.7159	57	164.549	57	89.469	57	119.996	57	132.141	57	22.01	57	103.482	57	168.907
58	157.377	58	107.277	58	193.652	58	84.4555	58	89.849	58	50.2815	58	163.344	58	98.2436	58	73.021	58	99.168	58	0	58	141.77	58	13.598	58	116.418	58	180.885	58	91.629	58	187.703	58	93.0356	58	169.481	58	89.533	58	125.384	58	132.187	58	52.109	58	100.352	58	172.709
59	162.982	59	105.069	59	182.838	59	82.9333	59	108.088	59	53.7129	59	159.219	59	101.704	59	122.035	59	99.658	59	0	59	142.502	59	27.971	59	115.747	59	192.784	59	88.674	59	192.023	59	88.9723	59	170.789	59	93.193	59	127.779	59	132.701	59	97.784	59	98.341	59	186.738
60	153.576	60	106.353	60	182.496	60	85.1593	60	115.344	60	57.9289	60	156.897	60	107.928	60	159.44	60	101.055	60	0	60	138.591	60	46.126	60	118.1	60	192.866	60	87.206	60	192.078	60	86.969	60	180.65	60	92.034	60	130.881	60	136.123	60	141.84	60	99.256	60	198.761
61	143.188	61	106.186	61	182.117	61	85.7256	61	108.293	61	59.2843	61	152.763	61	115.188	61	170.884	61	104.515	61	0	61	130.864	61	67.679	61	119.852	61	192.306	61	89.378	61	193.989	61	88.3973	61	201.387	61	91.244	61	136.062	61	131.258	61	170.108	61	100.409	61	212.898
62	130.26	62	101.068	62	172.016	62	87.2951	62	91.683	62	58.4287	62	152.574	62	119.209	62	158.197	62	105.89	62	0	62	124.148	62	80.079	62	122.364	62	186.242	62	91.421	62	189.415	62	91.03	62	218.357	62	90.037	62	137.881	62	125.238	62	164.418	62	104.46	62	228.14
63	122.009	63	94.5553	63	153.725	63	93.6069	63	85.409	63	55.2208	63	153.514	63	119.517	63	136.831	63	99.045	63	0	63	120.903	63	80.519	63	121.434	63	161.004	63	94.497	63	177.304	63	96.256	63	213.513	63	88.271	63	136.778	63	126.445	63	157.433	63	109.522	63	218.025
64	128.996	64	92.0706	64	142.643	64	101.4	64	96.613	64	53.6898	64	143.68	64	118.092	64	122.959	64	92.697	64	0	64	119.688	64	76.302	64	116.193	64	111.382	64	99.823	64	168.507	64	100.808	64	187.049	64	80.015	64	126.74	64	116.25	64	154.313	64	112.467	64	174.575
65	151.464	65	95.864	65	139.777	65	107.374	65	122.496	65	54.2721	65	123.269	65	115.998	65	132.288	65	87.761	65	0.174	65	115.023	65	74.088	65	112.461	65	59.736	65	110.189	65	169.463	65	102.092	65	148.388	65	70.294	65	120.023	65	118.587	65	155.655	65	113.61	65	121.278
66	174.758	66	103.649	66	129.543	66	111.988	66	147.513	66	53.372	66	96.101	66	116.251	66	150.371	66	84.757	66	0.849	66	110.445	66	84.898	66	105.43	66	23.886	66	117.37	66	176.399	66	103.41	66	103.768	66	65.484	66	117.819	66	120.042	66	172.271	66	119.373	66	72.142
67	186.74	67	108.041	67	122.54	67	112.778	67	145.763	67	53.8782	67	67.577	67	116.867	67	175.872	67	83.091	67	1	67	109.711	67	108.911	67	94.54	67	6.409	67	120.564	67	175.982	67	106.253	67	62.976	67	63.752	67	121.715	67	117.79	67	197.364	67	127.459	67	35.6
68	181.676	68	109.429	68	110.322	68	112.998	68	120.552	68	53.6521	68	44.888	68	118.296	68	193.605	68	80.299	68	1.089	68	115.572	68	148.41	68	89.275	68	0.789	68	122.217	68	163.036	68	109.938	68	34.921	68	69.202	68	110.425	68	119.866	68	207.209	68	128.632	68	13.331
69	158.608	69	111.605	69	91.496	69	106.976	69	87.622	69	54.2287	69	31.33	69	114.033	69	204.383	69	75.29	69	1.828	69	117.555	69	198.215	69	89.013	69	0	69	125.114	69	134.781	69	113.1	69	16.856	69	80.772	69	82.388	69	121.559	69	209.099	69	128.58	69	2.64
70	124.509	70	107.866	70	66.899	70	105.491	70	66.838	70	55.2592	70	23.852	70	111.359	70	220.096	70	73.662	70	2.033	70	112.142	70	235.39	70	92.743	70	0	70	134.167	70	94.406	70	116.373	70	6.448	70	91.024	70	54.638	70	128.16	70	217.097	70	122.906	70	0
71	86.034	71	104.942	71	48.485	71	108.649	71	57.945	71	53.9852	71	17.358	71	112.579	71	229.555	71	76.148	71	2.814	71	104.466	71	222.614	71	96.317	71	0	71	138.197	71	55.842	71	118.427	71	1.848	71	91.224	71	28.228	71	134.625	71	226.623	71	115.12	71	0
72	47.699	72	104.175	72	32.35	72	111.168	72	56.346	72	53.8333	72	10.226	72	113.229	72	219.325	72	81.046					72	178.202	72	94.61	72	0	72	138.337	72	28.396	72	119.378	72	0.221	72	97.656	72	13.02	72	142.326	72	229.338	72	109.307	72	0
73	20.801	73	106.179	73	21.678	73	116.058	73	62.645	73	50.9315	73	3.681	73	118.867	73	197.383	73	87.178					73	146.541	73	92.646	73	0	73	140.869	73	14.213	73	120.648	73	0	73	103.607	73	6.24	73	153.284	73	220.408	73	105.319	73	0
74	6.389	74	106.46	74	12.434	74	123.145	74	64.93	74	48.7726	74	0.352	74	119.17	74	161.559	74	91.396					74	128.88	74	89.873	74	0	74	144.078	74	8.335	74	121.787	74	0	74	103.009	74	4.897	74	157.383	74	193.15	74	104.316	74	0
75	1.344	75	109.988	75	5.396	75	126.517	75	62.857	75	49.843	75	0	75	111.78	75	116.177	75	94.605					75	122.537	75	87.22	75	0	75	142.966	75	4.378	75	122.886	75	0	75	99.591	75	7.233	75	162.012	75	165.221	75	104.916	75	0
76	0	76	111.942	76	1.59	76	127.266	76	63.671	76	50.8477	76	0	76	105.094	76	71.63	76	99.795					76	127.903	76	85.109	76	0	76	135.336	76	1.218	76	122.665	76	0	76	102.459	76	8.483	76	159.857	76	153.583	76	107.58	76	0.02
77	0	77	115.325	77	0.4	77	134.54	77	76.152	77	53.6217	77	0	77	99.4353	77	34.195	77	104.29					77	147.942	77	84.521	77	0	77	128.92	77	0	77	119.818	77	0	77	103.643	77	7.068	77	151.549	77	149.875	77	108.709	77	0.313
78	0	78	122.04	78	0	78	141.912	78	98.231	78	58.1467	78	0.072	78	96.8165	78	10.796	78	106.408					78	169.951	78	85.716	78	0.6	78	122.811	78	0	78	118.836	78	0	78	97.74	78	4.462	78	142.175	78	147.101	78	107.732	78	0.876
79	0	79	126.726	79	0.203	79	149.216	79	117.593	79	60.269	79	0.365	79	94.0861	79	1.756	79	110.115					79	184.95	79	84.016	79	1.557	79	115.392	79	0.352	79	117.285	79	0.778	79	98.651	79	2.435	79	144.737	79	140.888	79	105.485	79	1.242
80	0	80	129.315	80	1.685	80	156.77	80	113.4	80	64.7369	80	0.213	80	90.3976	80	0	80	112.592					80	192.89	80	87.754	80	2.028	80	111.562	80	3.344	80	117.641	80	1.695	80	100.222	80	2	80	146.052	80	111.561	80	100.942	80	0.982
81	0	81	134.629	81	3	81	157	81	88.697	81	67.9852	81	0.166	81	88.4731	81	0	81	114.971					81	189.776	81	92.282	81	2.815	81	110.347	81	11.464	81	126.272	81	2.343	81	96.007	81	2.487	81	141.546	81	76.987	81	96.516	81	1
82	0	82	137.575	82	4.686	82	154.246	82	55.692	82	72.2807	82	1.094	82	87.9115	82	0	82	123.983					82	155.631	82	99.416	82	4.06	82	112.154	82	22.448	82	135.247	82	2.605	82	87.358	82	3.65	82	134.984	82	45.923	82	89.325	82	1.221
83	0	83	138.734	83	6.372	83	152.425	83	28.112	83	75.9902	83	2.226	83	91.7261	83	0	83	123.044					83	118.322	83	107.703	83	5.305	83	116.49	83	31.726	83	137.25	83	3.684	83	82.019	83	4.338	83	132.586	83	24.87	83	85.872	83	2.337
84	0	84	140.336	84	7	84	146.343	84	11.157	84	78.0824	84	4.717	84	95.8237	84	0	84	116.606					84	88.042	84	109.431	84	6	84	119.34	84	36.855	84	136.924	84	4.769	84	77.545	84	5.154	84	125.782	84	13.848	84	84.928	84	4.014
85	0	85	137.798	85	7	85	137.189	85	4.376	85	81.0174	85	5.905	85	97.8855	85	0	85	108.337					85	63.662	85	110	85	6.304	85	119.467	85	41.922	85	134.055	85	5.306	85	73.98	85	5.973	85	115.394	85	9.663	85	87.757	85	4.435
86	0.419	86	131.319	86	6.377	86	128.01	86	2.029	86	82.4962	86	5.601	86	99.1966	86	0.363	86	103.933					86	46.457	86	113.158	86	7	86	120.421	86	42.522	86	133.377	86	6	86	73.502	86	6.91	86	107.11	86	6.248	86	94.137	86	4.953
87	1.301	87	126.704	87	5.608	87	118.317	87	2.56	87	81.3483	87	5.362	87	95.2161	87	0.958	87	97.609					87	37.394	87	113.777	87	7	87	124.763	87	41.509	87	130.751	87	6	87	74.847	87	7.762	87	108.447	87	2.873	87	99.859	87	4.139
88	2.713	88	122.981	88	5.351	88	112.652	88	1.678	88	83.6086					88	0.064	88	89.769					88	32.842	88	109.422	88	6.822	88	126.77	88	40.926	88	130.516	88	6.256	88	72.294	88	8.541	88	113.115	88	0.202	88	107.709	88	4.666
89	3	89	115.639	89	5.046	89	107.171	89	0.861	89	86.6673					89	0	89	88.04					89	25.66	89	106.656	89	5.864	89	126.542	89	38.746	89	130.626	89	6.981	89	68.472	89	8.229	89	127.542	89	0	89	112.645	89	4.13
90	2.924	90	111.273	90	5.749	90	103.3	90	0	90	90.0813					90	0	90	90.177					90	16.429	90	103.054	90	5.007	90	129.193	90	39.924	90	131.265	90	7.033	90	74.55	90	9.045	90	146.543	90	0	90	114.102	90	4.248
91	2.26	91	109.417	91	7.102	91	104.484	91	0	91	89.2829					91	0	91	93.456					91	9.005	91	98.428	91	5.215	91	124.979	91	42.893	91	131.747	91	7.876	91	81.709	91	9.515	91	151.239	91	0	91	114.882	91	4.03
92	2	92	106.262	92	7.812	92	108.645	92	0	92	85.2282					92	0	92	97.053					92	4.305	92	100.479	92	5.498	92	128.027	92	38.445	92	123.842	92	8.122	92	86.597	92	8.941	92	156.204	92	0	92	114.242	92	4.247
93	2.049	93	105.759	93	7.527	93	112.038	93	0	93	82.9525					93	0.437	93	97.924					93	1.253	93	101.234	93	5.026	93	131.646	93	30.887	93	114.388	93	7.522	93	87.445	93	8.185	93	155.689	93	0	93	113.23	93	4.545
94	2.853	94	107.437	94	8.071	94	115.767	94	0.06	94	80.6154					94	3.28	94	97.877					94	0	94	102.119	94	5	94	132.513	94	21.594	94	110.758	94	7.825	94	86.574					94	0	94	113.012	94	4.397
95	3.398	95	109.436	95	8.615	95	125.583	95	1.201	95	73.9064					95	7.497	95	96.312					95	0	95	102.486	95	5	95	132.705	95	12.712	95	113.169	95	8.881	95	89.133					95	0	95	105.241
96	4	96	112.118	96	8.908	96	135.247	96	3.321	96	66.6877					96	11.866	96	92.94					96	0	96	102.597	96	5	96	131.928	96	6.342	96	116.23	96	10.684	96	97.843					96	0	96	99.533
97	4.503	97	112.137	97	9	97	135.521	97	6.049	97	63.7081					97	15.56	97	88.63					97	0	97	100.865	97	5	97	132.661	97	3.439	97	111.387	97	12.854	97	107.95					97	0.552	97	92.746
				98	9	98	132.236	98	7.016	98	58.3912					98	16.245	98	88.398					98	0	98	92.774	98	4.609	98	132.867	98	3.001	98	105.178	98	13.503	98	115.093					98	1.279	98	86.405
				99	8.906	99	123.966	99	7.402	99	59.7998					99	11.75	99	88.174					99	0.005	99	88.449	99	4.452	99	130.469					99	12.485	99	116.551					99	1.726	99	83.3
								100	6.922	100	61.0719					100	6.661	100	92.384					100	0.372	100	83.584	100	4.303	100	131.637													100	2.173	100	82.034
								101	4.964	101	63.0503					101	4.291	101	100.127					101	1.466	101	75.117	101	4.014	101	131.337													101	2.77	101	83.611
								102	3.989	102	64.3843					102	3.465	102	107.192					102	1.758	102	72.37	102	4.576	102	127.784													102	4.068	102	89.028
								103	3.759	103	65.8133					103	4.689	103	105.289					103	2.905	103	73.481	103	5	103	127.062													103	4.545	103	90.453
								104	4.021	104	59.1735					104	7.317	104	104.341					104	3.145	104	74.836	104	5.303	104	129.137													104	5.887	104	87.403
								105	4.92	105	53.0633					105	7.995	105	100.187					105	4.336	105	78.017	105	4.948	105	130.329													105	6.335	105	83.611
								106	5	106	52.0718													106	4.991	106	83.212	106	5.155	106	135.43													106	6.959	106	77.862
								107	5	107	55.6779													107	5	107	86.963	107	5.25	107	139.793													107	7.423	107	76.715
								108	5	108	56.5314													108	5.932	108	83.363	108	5.232	108	140.205													108	7.374	108	74.741
								109	4.992	109	59.2699													109	6.129	109	84.148	109	5.002	109	136.69
								110	4.005	110	61.6742													110	6.147	110	85.622	110	5.67	110	128.284
								111	5	111	63.334													111	6.349	111	89.093	111	5.298	111	124.427
								112	5.499	112	63.9984													112	5.805	112	95.008	112	4.535	112	126.889
								113	6.992	113	63.2539													113	4.997	113	99.733	113	4	113	123.94
								114	7.991	114	64.324													114	4.688	114	98.283	114	3.777	114	116.616
								115	8.739	115	63.7564													115	6.308	115	93.045	115	3	115	110.884
								116	8.832	116	65.9596													116	7	116	86.624	116	3	116	108.214
								117	7.038	117	70.7351													117	7.476	117	81.859
								118	6.021	118	70.0211													118	9.047	118	81.215
																								119	9.038	119	79.458
																								120	7.943	120	75.425
																								121	6.112	121	73.646
[truncated: 70 more columns]

## Sheet: Binned
	1	FISH	PI	2	FISH	PI	3	FISH	PI	4	FISH	PI	5	FISH	PI	6	FISH	PI	7	FISH	PI	9	FISH	PI	10	FISH	PI	11	FISH	PI	12	FISH	PI	13	FISH	PI	14	FISH	PI	16	FISH	PI	17	FISH	PI	18	FISH	PI	19A
X	X	Y	Y	X	Y	Y	X	Y	Y	X	Y	Y	X	Y	Y	X	Y	Y	X	Y	Y	X	Y	Y	X	Y	Y	X	Y	Y	X	Y	Y	X	Y	Y	X	Y	Y	X	Y	Y	X	Y	Y	X	Y	Y	X
0	0	7	152	0	11	166	0	6	146	0	8	130	0	7	151	0	9	217	0	5	171	0	3	196	0	4	164	0	8	177	0	8	185	0	5	175	0	14	224	0	4	120	0	3	169	0	6	218	0
1	1.03093	6.574	160.61	1.0101	9.654	171.796	0.847458	7.883	145.247	1.14943	8.632	137.606	0.952381	6.431	164.522	1.40845	9.708	225.165	0.826446	4.265	174.631	0.862069	3.212	202.565	1.02041	4.914	175.27	1.0101	7.846	177.483	1.07527	7.082	190.022	0.925926	5.096	187.976	1.06383	14.985	233.937	1.0989	4.072	134.77	1.17647	3.662	187.67	0.884956	6.038	241.637	1.06383
2	2.06186	6.838	164.489	2.0202	8.308	176.812	1.69492	8.789	137.528	2.29885	8.368	148.201	1.90476	6.644	173.336	2.8169	8.777	229.189	1.65289	4.029	170.213	1.72414	3.973	203.05	2.04082	7.328	183.643	2.0202	6.808	173.546	2.15054	6.9	200.644	1.85185	5.12	188.53	2.12766	14.06	232.092	2.1978	4	140.578	2.35294	4.162	181.227	1.76991	7.075	254.212	2.12766
3	3.09278	7.714	163.736	3.0303	8	179.215	2.54237	9.342	127.376	3.44828	8.854	156.622	2.85714	6.533	175.605	4.22535	7.259	216.9	2.47934	4.662	167.269	2.58621	4.28	197.127	3.06122	9.483	184.034	3.0303	6.857	174.872	3.22581	7.054	209.423	2.77778	5.68	183.882	3.19149	11.683	224.305	3.2967	4	139.552	3.52941	4.989	174.887	2.65487	8.113	246.44	3.19149
4	4.12371	8.619	160.752	4.0404	8	175.058	3.38983	10.033	119.468	4.5977	9.53	155.67	3.80952	6.831	177.241	5.6338	6.065	193.839	3.30579	4.97	163.451	3.44828	4.855	184.383	4.08163	10	175.137	4.0404	9.485	182.106	4.30108	6.681	201.258	3.7037	6.239	173.143	4.25532	8.418	208.304	4.3956	4.019	142.566	4.70588	5.646	176.115	3.53982	8.154	234.803	4.25532
5	5.15464	9.456	158.465	5.05051	8.514	169.993	4.23729	9.764	115.695	5.74713	11.338	151.454	4.7619	8.555	175.805	7.04225	4.999	170.764	4.13223	6.276	162.308	4.31034	5.085	165.162	5.10204	10	167.261	5.05051	14.015	180.608	5.37634	6.935	196.897	4.62963	6.799	170.174	5.31915	6.267	179.256	5.49451	4.553	148.003	5.88235	6.231	170.728	4.42478	9.188	221.356	5.31915
6	6.18557	9.492	151.306	6.06061	9.441	165.218	5.08475	9.201	111.5	6.89655	14.005	150.361	5.71429	10.218	172.43	8.4507	5.092	150.999	4.95868	8.479	156.254	5.17241	5.9	155.118	6.12245	9.728	157.82	6.06061	19.923	172.276	6.45161	7.507	183.323	5.55556	7.349	167.564	6.38298	5.626	158.281	6.59341	4.947	152.217	7.05882	7.469	165.157	5.30973	9.231	207.37	6.38298
7	7.21649	9.974	141.1	7.07071	9.721	159.241	5.9322	8.416	102.057	8.04598	15.931	150.31	6.66667	13.464	165.656	9.85915	4.507	136.703	5.78512	11.134	149.463	6.03448	8.068	145.389	7.14286	9.112	149.28	7.07071	22.471	162.784	7.52688	8.509	174.276	6.48148	7.984	164.13	7.44681	5.063	146.216	7.69231	5.008	160.962	8.23529	9.669	157.374	6.19469	10.264	195.293	7.44681
8	8.24742	9.355	127.764	8.08081	10.863	151.057	6.77966	7.333	90.5115	9.1954	15.074	146.632	7.61905	16.902	159.43	11.2676	4.41	135.283	6.61157	11.94	146.296	6.89655	9.288	129.421	8.16327	8	138.301	8.08081	22.655	150.567	8.60215	9.574	173.962	7.40741	6.892	151.996	8.51064	6.522	133.344	8.79121	4.916	171.185	9.41176	12.291	151.831	7.07965	11.302	176.113	8.51064
9	9.27835	8.287	118.918	9.09091	11.091	138.642	7.62712	5.975	81.7508	10.3448	13.699	136.342	8.57143	19.674	156.583	12.6761	4	135.583	7.43802	11.915	143.49	7.75862	9.095	115.211	9.18367	7.698	131.156	9.09091	19.871	137.368	9.67742	10.54	165.163	8.33333	6.077	142.035	9.57447	7.548	124.185	9.89011	4.845	167.942	10.5882	15.098	140.369	7.9646	10.353	168.475	9.57447
10	10.3093	8.448	112.772	10.101	10.155	122.993	8.47458	5.528	77.2786	11.4943	13.372	121.455	9.52381	18.403	151.703	14.0845	4.052	137.248	8.26446	10.277	135.627	8.62069	9.046	104.881	10.2041	6.995	126.751	10.101	15.96	127.132	10.7527	11.594	149.935	9.25926	6.911	133.301	10.6383	7.575	120.112	10.989	6.155	157.361	11.7647	15.619	129.553	8.84956	10.384	152.964	10.6383
11	11.3402	7.331	108.887	11.1111	9.186	108.202	9.32203	5.852	76.7971	12.6437	13.554	108.865	10.4762	15.606	144.547	15.493	5.378	129.928	9.09091	7.876	127.743	9.48276	9.207	98.667	11.2245	6.617	118.725	11.1111	11.001	117.655	11.828	11.59	136.096	10.1852	7.317	125.859	11.7021	7.109	116.531	12.0879	8.94	142.233	12.9412	13.56	117.303	9.73451	10.423	148.038	11.7021
12	12.3711	6.033	106.411	12.1212	8.379	97.5825	10.1695	6.733	72.8452	13.7931	11.905	99.0379	11.4286	12.571	134.718	16.9014	6.073	119.966	9.91736	5.717	121.913	10.3448	8.238	93.967	12.2449	5.415	113.533	12.1212	6.98	111.557	12.9032	11.332	132.294	11.1111	8.437	115.274	12.766	6.358	114.91	13.1868	13.035	127.488	14.1176	11.063	105.147	10.6195	9.013	148.457	12.766
13	13.4021	4.702	107.579	13.1313	8.074	94.0274	11.0169	7.628	71.3724	14.9425	13.258	87.8908	12.381	8.997	132.804	18.3099	7.648	109.577	10.7438	4.938	120.429	11.2069	6.911	93.234	13.2653	4.279	110.287	13.1313	6	109.59	13.9785	10.768	131.085	12.037	10.05	102.778	13.8298	5.402	121.582	14.2857	16.695	113.933	15.2941	9.504	103.073	11.5044	8.01	143.053	13.8298
14	14.433	4.013	113.543	14.1414	8.637	96.4903	11.8644	7.739	74.3699	16.092	15.843	80.545	13.3333	7.489	130.625	19.7183	9.293	103.936	11.5702	5.023	123.515	12.069	5.33	89.918	14.2857	4.087	118.535	14.1414	6.404	106.902	15.0538	9.974	120.276	12.963	10.335	95.544	14.8936	4.594	124.562	15.3846	18.694	108.31	16.4706	7.638	102.876	12.3894	7.543	146.426	14.8936
15	15.4639	3.779	120.558	15.1515	9.895	99.4844	12.7119	7.413	77.6625	17.2414	15.795	82.1697	14.2857	6.462	120.62	21.1268	9.896	97.87	12.3967	5.752	125.25	12.931	4.592	89.524	15.3061	5.011	121.761	15.1515	7.109	101.773	16.129	8.99	107.943	13.8889	9.401	88.627	15.9574	4.591	122.617	16.4835	16.502	110.132	17.6471	6.448	98.428	13.2743	6.017	149.96	15.9574
16	16.4948	3.575	126.497	16.1616	10.758	100.69	13.5593	7.263	81.7009	18.3908	14.904	77.3162	15.2381	6.294	113.96	22.5352	9.574	95.992	13.2231	6	125.278	13.7931	3.584	96.788	16.3265	5.583	124.968	16.1616	7.93	95.157	17.2043	6.867	104.863	14.8148	7.796	85.12	17.0213	6	119	17.5824	12.349	108.669	18.8235	5.591	95.416	14.1593	4.631	144.525	17.0213
17	17.5258	4	130.794	17.1717	11.717	98.4774	14.4068	7.316	87.2447	19.5402	11.916	73.288	16.1905	7.293	103.145	23.9437	7.516	102.223	14.0496	5.965	124.028	14.6552	3	106.123	17.3469	6.322	120.2	17.1717	8.568	94.341	18.2796	6.107	97.675	15.7407	6.869	83.558	18.0851	6.521	116.809	18.6813	10.245	106.231	20	5.253	95.437	15.0442	3.666	134.436	18.0851
18	18.5567	4.096	134.523	18.1818	12.181	95.2473	15.2542	6.9	86.5115	20.6897	8.632	75.1542	17.1429	8.353	96.954	25.3521	5.835	110.641	14.876	5.273	120.708	15.5172	3	106.579	18.3673	6.942	118.444	18.1818	8.15	93.891	19.3548	5.937	93.514	16.6667	5.171	84.476	19.1489	7.746	119.734	19.7802	9.423	104.781	21.1765	4.503	97.079	15.9292	3.009	129.45	19.1489
19	19.5876	4	136.973	19.1919	11.148	97.4833	16.1017	6.006	83.0177	21.8391	7.71	81.0813	18.0952	9.313	95.577	26.7606	4.437	113.999	15.7025	5	114.791	16.3793	3.03	105.819	19.3878	6.18	115.947	19.1919	8.818	98.204	20.4301	5.767	90.735	17.5926	4.257	86.184	20.2128	7.133	121.589	20.8791	8.663	99.2474	22.3529	4	98.881	16.8142	3	123.013	20.2128
20	20.6186	4	136.806	20.202	8.574	98.2133	16.9492	5.111	82.9505	22.9885	8.901	82.34	19.0476	10.999	95.556	28.169	3.056	111.101	16.5289	5.01	112.948	17.2414	3.642	102.704	20.4082	6.039	115.188	20.202	9.86	98.592	21.5054	5.509	89.618	18.5185	4.31	85.882	21.2766	7.261	123.384	21.978	7.592	95.3526	23.5294	4	102.45	17.6991	3.985	115.119	21.2766
21	21.6495	4.001	136.641	21.2121	7.309	96.6306	17.7966	5	77.5192	24.1379	10.657	84.3258	20	13.173	94.189	29.5775	1.641	111.512	17.3554	5	107.673	18.1034	4	102.104	21.4286	7.326	123.716	21.2121	9.648	91.545	22.5806	5.955	93.625	19.4444	6.315	87.709	22.3404	6.843	127.478	23.0769	6.238	96.2693	24.7059	3.253	100.609	18.5841	5.969	112.236	22.3404
22	22.6804	4.573	129.017	22.2222	6.983	96.5687	18.6441	5	71.1489	25.2874	11.919	91.0271	20.9524	14.388	90.602	30.9859	0.967	112.763	18.1818	5.27	102.613	18.9655	4.161	100.801	22.449	10.084	129.059	22.2222	9.332	88.838	23.6559	6.391	95.082	20.3704	9.092	86.083	23.4043	6.766	127.968	24.1758	5.083	95.315	25.8824	3.28	96.12	19.469	6.984	111.627	23.4043
23	23.7113	4.207	124.002	23.2323	6.743	96.058	19.4915	5	69.2448	26.4368	10.519	95.7665	21.9048	12.996	86.05	32.3944	0.375	113.389	19.0083	6	106.048	19.8276	4.975	96.534	23.4694	12.686	135.042	23.2323	8.197	89.921	24.7312	6	94.686	21.2963	11.761	83.992	24.4681	6.243	126.355	25.2747	3.647	95.7424	27.0588	2.715	94.073	20.354	7	113.772	24.4681
24	24.7423	4	121.657	24.2424	7.382	95	20.339	5	69.8395	27.5862	7.901	101.694	22.8571	10.213	87.419	33.8028	0	113.118	19.8347	6.027	107.171	20.6897	4.977	95.334	24.4898	15.515	134.215	24.2424	7.274	92.629	25.8065	6	101.019	22.2222	11.613	86.022	25.5319	7.218	121.783	26.3736	3.414	97.0733	28.2353	2	92.755	21.2389	7	124.721	25.5319
25	25.7732	3.6	116.938	25.2525	8	95.9987	21.1864	5	71.4279	28.7356	6.03	102.041	23.8095	7.89	92.559	35.2113	0	113.049	20.6612	7.015	106.014	21.5517	5	96.027	25.5102	16.938	131.347	25.2525	8	99.259	26.8817	7.098	106.127	23.1481	9.574	85.731	26.5957	7.251	123.262	27.4725	4.527	96.2476	29.4118	2	93.424	22.1239	7	128.964	26.5957
26	26.8041	3	111.094	26.2626	8	99.2701	22.0339	5.095	73	29.8851	4.607	91.6363	24.7619	6.547	98.663	36.6197	0	111.249	21.4876	8.001	104.427	22.4138	4.361	97.08	26.5306	15.962	131.707	26.2626	8	96.911	27.957	8.021	110.456	24.0741	6.56	84.138	27.6596	5.885	122.198	28.5714	5	91.6897	30.5882	2	97.139	23.0088	7	134.883	27.6596
27	27.8351	3	105.354	27.2727	7.701	103.835	22.8814	4.925	73.7365	31.0345	3.903	85.4931	25.7143	5.874	105.825	38.0282	0	110.755	22.314	8.624	106.505	23.2759	3.073	97.78	27.551	15.19	132.19	27.2727	8.684	93.19	29.0323	8.164	111.517	25	4.299	85.252	28.7234	4.708	124.174	29.6703	4.83	89.2161	31.7647	1.263	98.651	23.8938	6.052	134	28.7234
28	28.866	2.691	102.431	28.2828	7.94	110.978	23.7288	4.457	77.5889	32.1839	3.214	81.4469	26.6667	5.938	106.456	39.4366	0	112.8	23.1405	9.555	104	24.1379	2.512	98.849	28.5714	14.97	131.329	28.2828	9.487	89.286	30.1075	8.962	109.763	25.9259	3.876	89.451	29.7872	3.891	126.954	30.7692	3.924	89.0836	32.9412	1.415	101.524	24.7788	5.085	131.724	29.7872
29	29.8969	2	102.586	29.2929	7.368	115.741	24.5763	4.002	79.8171	33.3333	3.078	79.8519	27.619	6.507	102.739	40.8451	0	113.159	23.9669	9.884	99.936	25	2	97.117	29.5918	13.564	131.746	29.2929	10.01	86.381	31.1828	8.175	111.869	26.8519	5.287	91.108	30.8511	2.999	125.015	31.8681	3.064	88.1551	34.1176	2	108.536	25.6637	5	127.44	30.8511
30	30.9278	2.145	105.334	30.303	7.676	116.319	25.4237	3.93	77.0851	34.4828	3	81.7028	28.5714	7.026	104.258	42.2535	0	110.919	24.7934	9.046	95.721	25.8621	2	99.263	30.6122	10.222	130.453	30.303	10.229	91.337	32.2581	6.58	116.14	27.7778	6.829	87.529	31.9149	2.499	126.093	32.967	3	90.0471	35.2941	2.326	120.46	26.5487	5.886	124.657	31.9149
31	31.9588	3.15	111.267	31.3131	7.409	115.306	26.2712	4	73.4258	35.6322	2.489	89.996	29.5238	7	103.308	43.662	0	112.775	25.6198	7.117	93.684	26.7241	2	105.011	31.6327	6.18	127.918	31.3131	9.482	95.879	33.3333	5.527	113.023	28.7037	6.888	87.025	32.9787	1.935	125.181	34.0659	3.542	91.5163	36.4706	2.961	127.549	27.4336	9.848	128.601	32.9787
32	32.9897	2.671	115.901	32.3232	7	114.39	27.1186	4	71.4203	36.7816	2	98.047	30.4762	7	103.423	45.0704	0	113.44	26.4463	6.071	92.936	27.5862	2	107.135	32.6531	2.814	126.918	32.3232	9.963	103.04	34.4086	5.138	110.694	29.6296	6.485	90.204	34.0426	1.15	125.056	35.1648	4.337	95.0467	37.6471	2.22	123.674	28.3186	14.551	130.098	34.0426
33	34.0206	2.2	123.669	33.3333	7	117.376	27.9661	4	68.1776	37.931	1.954	104.687	31.4286	7	101.502	46.4789	2.423	109.084	27.2727	6	95.485	28.4483	2	109.063	33.6735	0.578	124.136	33.3333	10.176	116.461	35.4839	5.973	104.459	30.5556	5.657	91.757	35.1064	0.836	123.134	36.2637	4.53	97.1088	38.8235	1.066	117.836	29.2035	17.277	128.362	35.1064
34	35.0515	1.748	126.506	34.3434	6.739	119.286	28.8136	4	68.3314	39.0805	1.23	110.215	32.381	7.403	98.75	47.8873	13.293	105.894	28.0992	6	97.07	29.3103	2.724	116.357	34.6939	0	121.994	34.3434	10.226	121.43	36.5591	6	105.643	31.4815	5.006	89.278	36.1702	0.212	117.86	37.3626	4.274	100.127	40	0.222	111.642	30.0885	17.885	129.311	36.1702
35	36.0825	1.032	127.718	35.3535	6	118.758	29.661	4	70.9574	40.2299	0.506	116.14	33.3333	7.705	97.302	49.2958	41.208	105.571	28.9256	6	97.633	30.1724	3	118.735	35.7143	0	125.132	35.3535	10.145	121.139	37.6344	5.13	110.943	32.4074	5.595	88.381	37.234	0	115.353	38.4615	3.823	106.485	41.1765	0	114.498	30.9735	15.001	129.249	37.234
36	37.1134	0.286	128.784	36.3636	5.564	120.377	30.5085	3.9	73.2758	41.3793	0.474	121.186	34.2857	7.338	97.368	50.7042	82.137	104.97	29.7521	5.97	103.249	31.0345	3.437	116.703	36.7347	0	130.024	36.3636	9.55	122.76	38.7097	3.931	113.344	33.3333	6	92.588	38.2979	0	114.771	39.5604	2.453	114.069	42.3529	0	114.948	31.8584	10.827	125.663	38.2979
37	38.1443	0	126.35	37.3737	5.009	124.608	31.3559	3.359	80.9381	42.5287	0.114	122.175	35.2381	7.415	100.759	52.1127	121.716	111.747	30.5785	5.107	103.81	31.8966	3.957	118.682	37.7551	0	134.076	37.3737	8.252	119.628	39.7849	3.275	122.511	34.2593	6	96.101	39.3617	0	114.975	40.6593	2.165	116.16	43.5294	0	111.772	32.7434	7.842	118.192	39.3617
38	39.1753	0	122.417	38.3838	4.411	131.483	32.2034	2.018	89.8823	43.6782	0.455	118.275	36.1905	6.908	107.461	53.5211	155.979	115.251	31.405	4.704	109.91	32.7586	2.375	116.795	38.7755	0	137.023	38.3838	5.805	117.483	40.8602	3.507	133.822	35.1852	6	100.705	40.4255	0	120.763	41.7582	1.302	114.526	44.7059	0	110.916	33.6283	5.809	114.361	40.4255
39	40.2062	0	120.074	39.3939	2.73	140.12	33.0508	1.559	86.028	44.8276	0.236	121.726	37.1429	5.056	111.04	54.9296	181.745	120.836	32.2314	4.078	114.719	33.6207	0.685	118.091	39.7959	0	138.516	39.3939	3.165	118.525	41.9355	4.35	134.664	36.1111	6	103.014	41.4894	0	126.886	42.8571	0.408	111.454	45.8824	0	108.883	34.5133	4.062	110.844	41.4894
40	41.2371	0	116.766	40.404	1.163	150.357	33.8983	0.334	84.765	45.977	1.998	117.74	38.0952	3.26	113.409	56.338	198.698	129.345	33.0579	3.169	113.186	34.4828	0	125.09	40.8163	0	135.985	40.404	1.076	124.956	43.0108	5.289	132.446	37.037	5.519	105.366	42.5532	0	129.287	43.956	0	108.686	47.0588	0	111.183	35.3982	3.038	106.577	42.5532
41	42.268	0	114.342	41.4141	0.157	157.098	34.7458	0	84.8946	47.1264	8.576	109.097	39.0476	2.064	119.029	57.7465	200.136	134.05	33.8843	3	117.136	35.3448	0	135.351	41.8367	0	131.05	41.4141	0.087	131.923	44.086	6.516	131.123	37.963	5.001	108.725	43.617	0	128.214	45.0549	0	106.074	48.2353	0	107.371	36.2832	2.417	103.485	43.617
42	43.299	0	118.172	42.4242	0	157.238	35.5932	0	85.8576	48.2759	22.122	107.603	40	0.621	124.768	59.1549	200.084	130.584	34.7107	3	124.364	36.2069	0	141.151	42.8571	0	128.095	42.4242	0	130.627	45.1613	8.362	136.979	38.8889	3.296	112.062	44.6809	0	124.028	46.1538	0	106.162	49.4118	1.044	105.095	37.1681	2	100.251	44.6809
43	44.3299	0	123.071	43.4343	0	156.453	36.4407	0	87	49.4253	42.746	109.501	40.9524	0	128.176	60.5634	213.767	125.772	35.5372	2.344	127.968	37.069	0	144.869	43.8776	0	124.17	43.4343	0	122.47	46.2366	11.165	144.05	39.8148	2.417	111.362	45.7447	0.057	124.38	47.2527	0	104.864	50.5882	7.064	102.82	38.0531	2.421	98.607	45.7447
44	45.3608	0	129.567	44.4444	0	152.219	37.2881	0	85.5808	50.5747	56.621	106.173	41.9048	0	129.729	61.9718	226.118	124.288	36.3636	1.544	131.916	37.931	0	143.627	44.898	0	118.912	44.4444	0	126.585	47.3118	14.354	152.45	40.7407	2.634	115.153	46.8085	4.967	124.154	48.3516	0	103.098	51.7647	22.091	101.633	38.9381	3	100.282	46.8085
45	46.3918	0	137.47	45.4545	0.079	149.465	38.1356	0	82.1277	51.7241	59.556	100.799	42.8571	0	125.137	63.3803	213.026	115.691	37.1901	0.823	132.151	38.7931	0	145.753	45.9184	1.679	119.923	45.4545	0.325	122.025	48.3871	16.708	160.369	41.6667	3	118.731	47.8723	21.307	125.551	49.4505	0	104.897	52.9412	45.608	101.682	39.823	2.645	103.087	47.8723
46	47.4227	0	147.988	46.4646	1.856	149.055	38.9831	0	79.2024	52.8736	66.817	93.1557	43.8095	0	117.276	64.7887	165.936	108.323	38.0165	0	126.36	39.6552	0	141.681	46.9388	7.266	120.728	46.4646	1.912	122.634	49.4624	20.542	163.378	42.5926	3	113.981	48.9362	46.991	123.804	50.5495	0	107.496	54.1176	71.867	98.962	40.708	1.348	102.812	48.9362
47	48.4536	0	152.561	47.4747	13.126	148.469	39.8305	0	76.9253	54.023	81.812	85.6119	44.7619	0	107.356	66.1972	115.778	106.312	38.843	0	124.36	40.5172	0	132.583	47.9592	17.72	120.147	47.4747	9.504	117.268	50.5376	27.916	154.083	43.5185	3.567	115.433	50	72.053	127.801	51.6484	0	113.047	55.2941	97.375	94.725	41.5929	0.38	103.814	50
48	49.4845	0	157.462	48.4848	32.406	146.103	40.678	0	76.0046	55.1724	103.278	83.1599	45.7143	0	96.209	67.6056	68.649	103.686	39.6694	0.169	118.921	41.3793	0.563	126.77	48.9796	32.707	117.89	48.4848	25.323	110.294	51.6129	36.198	142.026	44.4444	3.882	120.459	51.0638	94.657	130.626	52.7473	0	115.578	56.4706	122.186	85.936	42.4779	0	105.282	51.0638
49	50.5155	0	159.157	49.4949	51.278	137.663	41.5254	0	72.9785	56.3218	128.973	81.4621	46.6667	0	95.066	69.0141	35.054	104.256	40.4959	0.192	114.908	42.2414	3.279	122.48	50	50.637	112.261	49.4949	55.136	110.008	52.6882	46.86	139.235	45.3704	4.024	124.623	52.1277	113.246	129.753	53.8462	2.682	117.485	57.6471	141.316	84.569	43.3628	0	104.067	52.1277
50	51.5464	1.559	159.284	50.5051	63.17	126.715	42.3729	0	68.7173	57.4713	150.557	79.2046	47.619	0	98.366	70.4225	17.351	106.57	41.3223	0.515	115.825	43.1034	8.47	120.172	51.0204	70.935	101.973	50.5051	88.675	114.021	53.7634	59.266	147.191	46.2963	2.865	120.195	53.1915	128.491	122.978	54.9451	12.691	117.83	58.8235	151.565	88.278	44.2478	0	103.495	53.1915
51	52.5773	7.147	154.666	51.5152	70.242	116.186	43.2203	0	65.7251	58.6207	163.368	76.7325	48.5714	0	100.173	71.831	9.27	110.622	42.1488	0.276	117.881	43.9655	18.923	116.858	52.0408	93.353	93.8285	51.5152	115.89	117.17	54.8387	70.036	149.513	47.2222	1.532	116.347	54.2553	143.632	114.247	56.044	34.564	111.922	60	147.494	94.939	45.1327	0	98.978	54.2553
52	53.6082	21.687	142.32	52.5253	90.213	110.25	44.0678	1.395	65.2181	59.7701	174.28	73.9907	49.5238	0	101.524	73.2394	4.812	113.516	42.9752	0.128	117.723	44.8276	31.913	114.196	53.0612	114.662	88.2557	52.5253	133.157	118.748	55.914	75.363	153.901	48.1481	0.198	115.381	55.3191	153.906	106.213	57.1429	69.739	102.722	61.1765	134.571	96.647	46.0177	0	98.014	55.3191
53	54.6392	47.704	130.463	53.5354	124.451	106.142	44.9153	7.742	63.4124	60.9195	177.014	73.5337	50.4762	0	98.195	74.6479	1.999	112.848	43.8017	0	117.334	45.6897	53.808	111.218	54.0816	136.755	86.4424	53.5354	127.857	113.635	56.9892	86.336	141.2	49.0741	0.096	117.149	56.383	167.863	99.956	58.2418	112.471	94.7657	62.3529	124.672	90.96	46.9027	0	99.451	56.383
54	55.6701	83.942	122.898	54.5455	166.363	101.53	45.7627	19.931	59.4616	62.069	176.755	78.2392	51.4286	0	98.609	76.0563	0.624	114.086	44.6281	0.05	118.15	46.5517	82.831	107.72	55.102	160.038	89.0408	54.5455	133.794	110.261	58.0645	97.055	134.533	50	0	119.482	57.4468	185.386	99.763	59.3407	154.872	88.3065	63.5294	126.629	80.04	47.7876	0	106.345	57.4468
55	56.701	112.91	118.792	55.5556	195.836	96.9515	46.6102	33.235	55.085	63.2184	172.274	82.8781	52.381	1.614	97.998	77.4648	0.079	115.723	45.4545	0.177	116.129	47.4138	112.873	102.384	56.1224	178.553	93.8924	55.5556	147.576	111.879	59.1398	109.502	133.897	50.9259	0.784	118.699	58.5106	186.863	100.733	60.4396	185.795	83.9131	64.7059	148.075	72.092	48.6726	0	116.51	58.5106
56	57.732	131.748	114.079	56.5657	213.861	91.35	47.4576	48.347	51.2595	64.3678	173.21	85.7733	53.3333	10.305	97.062	78.8732	0	123.004	46.281	2.168	112.432	48.2759	144.38	99.01	57.1429	189.04	97.3908	56.5657	156.143	99.307	60.2151	114.802	133.228	51.8519	6.476	111.923	59.5745	178.191	100.754	61.5385	200.911	80.7873	65.8824	180.248	68.424	49.5575	0	126.542	59.5745
57	58.7629	147.636	109.683	57.5758	211.116	89.1853	48.3051	69.342	48.9169	65.5172	169.241	92.2969	54.2857	33.089	98.423	80.2817	0	136.022	47.1074	4.568	111.98	49.1379	165.747	96.106	58.1633	187.722	96.7159	57.5758	164.549	89.469	61.2903	119.996	132.141	52.7778	22.01	103.482	60.6383	168.907	102.627	62.6374	207.533	77.5905	67.0588	212.098	66.978	50.4425	0	137.165	60.6383
58	59.7938	157.377	107.277	58.5859	193.652	84.4555	49.1525	89.849	50.2815	66.6667	163.344	98.2436	55.2381	73.021	99.168	81.6901	0	141.77	47.9339	13.598	116.418	50	180.885	91.629	59.1837	187.703	93.0356	58.5859	169.481	89.533	62.3656	125.384	132.187	53.7037	52.109	100.352	61.7021	172.709	103.959	63.7363	207.061	75.2189	68.2353	230.413	69.863	51.3274	0	143.976	61.7021
59	60.8247	162.982	105.069	59.596	182.838	82.9333	50	108.088	53.7129	67.8161	159.219	101.704	56.1905	122.035	99.658	83.0986	0	142.502	48.7603	27.971	115.747	50.8621	192.784	88.674	60.2041	192.023	88.9723	59.596	170.789	93.193	63.4409	127.779	132.701	54.6296	97.784	98.341	62.766	186.738	103.529	64.8352	203.883	75.0729	69.4118	228.242	76.799	52.2124	0.035	142.815	62.766
60	61.8557	153.576	106.353	60.6061	182.496	85.1593	50.8475	115.344	57.9289	68.9655	156.897	107.928	57.1429	159.44	101.055	84.507	0	138.591	49.5868	46.126	118.1	51.7241	192.866	87.206	61.2245	192.078	86.969	60.6061	180.65	92.034	64.5161	130.881	136.123	55.5556	141.84	99.256	63.8298	198.761	102.399	65.9341	199.578	75.2206	70.5882	221.382	83.293	53.0973	0.898	134.406	63.8298
61	62.8866	143.188	106.186	61.6162	182.117	85.7256	51.6949	108.293	59.2843	70.1149	152.763	115.188	58.0952	170.884	104.515	85.9155	0	130.864	50.4132	67.679	119.852	52.5862	192.306	89.378	62.2449	193.989	88.3973	61.6162	201.387	91.244	65.5914	136.062	131.258	56.4815	170.108	100.409	64.8936	212.898	99.845	67.033	189.489	76.3456	71.7647	204.664	91.899	53.9823	5.005	126.051	64.8936
62	63.9175	130.26	101.068	62.6263	172.016	87.2951	52.5424	91.683	58.4287	71.2644	152.574	119.209	59.0476	158.197	105.89	87.3239	0	124.148	51.2397	80.079	122.364	53.4483	186.242	91.421	63.2653	189.415	91.03	62.6263	218.357	90.037	66.6667	137.881	125.238	57.4074	164.418	104.46	65.9574	228.14	96.378	68.1319	175.249	81.5019	72.9412	167.91	101.844	54.8673	21.632	118.327	65.9574
63	64.9485	122.009	94.5553	63.6364	153.725	93.6069	53.3898	85.409	55.2208	72.4138	153.514	119.517	60	136.831	99.045	88.7324	0	120.903	52.0661	80.519	121.434	54.3103	161.004	94.497	64.2857	177.304	96.256	63.6364	213.513	88.271	67.7419	136.778	126.445	58.3333	157.433	109.522	67.0213	218.025	93.865	69.2308	159.126	88.8832	74.1176	92.952	106.277	55.7522	54.929	110.405	67.0213
64	65.9794	128.996	92.0706	64.6465	142.643	101.4	54.2373	96.613	53.6898	73.5632	143.68	118.092	60.9524	122.959	92.697	90.1408	0	119.688	52.8926	76.302	116.193	55.1724	111.382	99.823	65.3061	168.507	100.808	64.6465	187.049	80.015	68.8172	126.74	116.25	59.2593	154.313	112.467	68.0851	174.575	97.638	70.3297	129.688	95.1226	75.2941	37.137	109.059	56.6372	96	103	68.0851
65	67.0103	151.464	95.864	65.6566	139.777	107.374	55.0847	122.496	54.2721	74.7126	123.269	115.998	61.9048	132.288	87.761	91.5493	0.174	115.023	53.719	74.088	112.461	56.0345	59.736	110.189	66.3265	169.463	102.092	65.6566	148.388	70.294	69.8925	120.023	118.587	60.1852	155.655	113.61	69.1489	121.278	104.733	71.4286	90.965	99.5797	76.4706	9.809	111.323	57.5221	141.789	102.119	69.1489
66	68.0412	174.758	103.649	66.6667	129.543	111.988	55.9322	147.513	53.372	75.8621	96.101	116.251	62.8571	150.371	84.757	92.9577	0.849	110.445	54.5455	84.898	105.43	56.8966	23.886	117.37	67.3469	176.399	103.41	66.6667	103.768	65.484	70.9677	117.819	120.042	61.1111	172.271	119.373	70.2128	72.142	106.834	72.5275	52.317	105.212	77.6471	0.873	113.323	58.4071	176.272	100.259	70.2128
67	69.0722	186.74	108.041	67.6768	122.54	112.778	56.7797	145.763	53.8782	77.0115	67.577	116.867	63.8095	175.872	83.091	94.3662	1	109.711	55.3719	108.911	94.54	57.7586	6.409	120.564	68.3673	175.982	106.253	67.6768	62.976	63.752	72.043	121.715	117.79	62.037	197.364	127.459	71.2766	35.6	107.69	73.6264	22.759	109.789	78.8235	0	121.038	59.292	195.479	96.1	71.2766
68	70.1031	181.676	109.429	68.6869	110.322	112.998	57.6271	120.552	53.6521	78.1609	44.888	118.296	64.7619	193.605	80.299	95.7746	1.089	115.572	56.1983	148.41	89.275	58.6207	0.789	122.217	69.3878	163.036	109.938	68.6869	34.921	69.202	73.1183	110.425	119.866	62.963	207.209	128.632	72.3404	13.331	108.388	74.7253	7.624	111.653	80	0	126.683	60.177	201.133	95.752	72.3404
69	71.134	158.608	111.605	69.697	91.496	106.976	58.4746	87.622	54.2287	79.3103	31.33	114.033	65.7143	204.383	75.29	97.1831	1.828	117.555	57.0248	198.215	89.013	59.4828	0	125.114	70.4082	134.781	113.1	69.697	16.856	80.772	74.1935	82.388	121.559	63.8889	209.099	128.58	73.4043	2.64	108	75.8242	1.049	111.931	81.1765	0	134.878	61.0619	202.906	95.61	73.4043
70	72.1649	124.509	107.866	70.7071	66.899	105.491	59.322	66.838	55.2592	80.4598	23.852	111.359	66.6667	220.096	73.662	98.5915	2.033	112.142	57.8512	235.39	92.743	60.3448	0	134.167	71.4286	94.406	116.373	70.7071	6.448	91.024	75.2688	54.638	128.16	64.8148	217.097	122.906	74.4681	0	113.04	76.9231	0	113.559	82.3529	0	130.92	61.9469	208.221	92.507	74.4681
71	73.1959	86.034	104.942	71.7172	48.485	108.649	60.1695	57.945	53.9852	81.6092	17.358	112.579	67.619	229.555	76.148	100	2.814	104.466	58.6777	222.614	96.317	61.2069	0	138.197	72.449	55.842	118.427	71.7172	1.848	91.224	76.3441	28.228	134.625	65.7407	226.623	115.12	75.5319	0	117	78.022	0	111.508	83.5294	0	118.505	62.8319	214.415	89.592	75.5319
72	74.2268	47.699	104.175	72.7273	32.35	111.168	61.0169	56.346	53.8333	82.7586	10.226	113.229	68.5714	219.325	81.046				59.5041	178.202	94.61	62.069	0	138.337	73.4694	28.396	119.378	72.7273	0.221	97.656	77.4194	13.02	142.326	66.6667	229.338	109.307	76.5957	0	115.88	79.1209	0	112.29	84.7059	0	106.148	63.7168	221.027	87.552	76.5957
73	75.2577	20.801	106.179	73.7374	21.678	116.058	61.8644	62.645	50.9315	83.908	3.681	118.867	69.5238	197.383	87.178				60.3306	146.541	92.646	62.931	0	140.869	74.4898	14.213	120.648	73.7374	0	103.607	78.4946	6.24	153.284	67.5926	220.408	105.319	77.6596	0	116.77	80.2198	0	116.27	85.8824	0	93.662	64.6018	227.954	83.856	77.6596
74	76.2887	6.389	106.46	74.7475	12.434	123.145	62.7119	64.93	48.7726	85.0575	0.352	119.17	70.4762	161.559	91.396				61.157	128.88	89.873	63.7931	0	144.078	75.5102	8.335	121.787	74.7475	0	103.009	79.5699	4.897	157.383	68.5185	193.15	104.316	78.7234	0	120.172	81.3187	0	118.829	87.0588	0	85.553	65.4867	244.314	82.86	78.7234
75	77.3196	1.344	109.988	75.7576	5.396	126.517	63.5593	62.857	49.843	86.2069	0	111.78	71.4286	116.177	94.605				61.9835	122.537	87.22	64.6552	0	142.966	76.5306	4.378	122.886	75.7576	0	99.591	80.6452	7.233	162.012	69.4444	165.221	104.916	79.7872	0	123.291	82.4176	0	118.773	88.2353	0	82.081	66.3717	243.396	83.684	79.7872
76	78.3505	0	111.942	76.7677	1.59	127.266	64.4068	63.671	50.8477	87.3563	0	105.094	72.381	71.63	99.795				62.8099	127.903	85.109	65.5172	0	135.336	77.551	1.218	122.665	76.7677	0	102.459	81.7204	8.483	159.857	70.3704	153.583	107.58	80.8511	0.02	126.91	83.5165	0	117.296	89.4118	0	84.035	67.2566	222.696	85.623	80.8511
77	79.3814	0	115.325	77.7778	0.4	134.54	65.2542	76.152	53.6217	88.5057	0	99.4353	73.3333	34.195	104.29				63.6364	147.942	84.521	66.3793	0	128.92	78.5714	0	119.818	77.7778	0	103.643	82.7957	7.068	151.549	71.2963	149.875	108.709	81.9149	0.313	126.533	84.6154	0	111.808	90.5882	0	89.5	68.1416	178.275	88.488	81.9149
78	80.4124	0	122.04	78.7879	0	141.912	66.1017	98.231	58.1467	89.6552	0.072	96.8165	74.2857	10.796	106.408				64.4628	169.951	85.716	67.2414	0.6	122.811	79.5918	0	118.836	78.7879	0	97.74	83.871	4.462	142.175	72.2222	147.101	107.732	82.9787	0.876	123.154	85.7143	0	110.527	91.7647	0	91.574	69.0265	138.334	91.417	82.9787
79	81.4433	0	126.726	79.798	0.203	149.216	66.9492	117.593	60.269	90.8046	0.365	94.0861	75.2381	1.756	110.115				65.2893	184.95	84.016	68.1034	1.557	115.392	80.6122	0.352	117.285	79.798	0.778	98.651	84.9462	2.435	144.737	73.1481	140.888	105.485	84.0426	1.242	122.741	86.8132	0.0003743	110.903	92.9412	0	91.074	69.9115	95.702	97.01	84.0426
80	82.4742	0	129.315	80.8081	1.685	156.77	67.7966	113.4	64.7369	91.954	0.213	90.3976	76.1905	0	112.592				66.1157	192.89	87.754	68.9655	2.028	111.562	81.6327	3.344	117.641	80.8081	1.695	100.222	86.0215	2	146.052	74.0741	111.561	100.942	85.1064	0.982	115.575	87.9121	0.528	107.368	94.1176	0	89.801	70.7965	59.861	102.132	85.1064
81	83.5052	0	134.629	81.8182	3	157	68.6441	88.697	67.9852	93.1034	0.166	88.4731	77.1429	0	114.971				66.9421	189.776	92.282	69.8276	2.815	110.347	82.6531	11.464	126.272	81.8182	2.343	96.007	87.0968	2.487	141.546	75	76.987	96.516	86.1702	1	107.445	89.011	1.867	107.055	95.2941	0	91.391	71.6814	31.245	103.746	86.1702
82	84.5361	0	137.575	82.8283	4.686	154.246	69.4915	55.692	72.2807	94.2529	1.094	87.9115	78.0952	0	123.983				67.7686	155.631	99.416	70.6897	4.06	112.154	83.6735	22.448	135.247	82.8283	2.605	87.358	88.172	3.65	134.984	75.9259	45.923	89.325	87.234	1.221	104.56	90.1099	3	108.578	96.4706	0.458	94.45	72.5664	11.358	101.584	87.234
83	85.567	0	138.734	83.8384	6.372	152.425	70.339	28.112	75.9902	95.4023	2.226	91.7261	79.0476	0	123.044				68.595	118.322	107.703	71.5517	5.305	116.49	84.6939	31.726	137.25	83.8384	3.684	82.019	89.2473	4.338	132.586	76.8519	24.87	85.872	88.2979	2.337	102.593	91.2088	3	106.457	97.6471	1.397	98.962	73.4513	2.017	99.383	88.2979
84	86.5979	0	140.336	84.8485	7	146.343	71.1864	11.157	78.0824	96.5517	4.717	95.8237	80	0	116.606				69.4215	88.042	109.431	72.4138	6	119.34	85.7143	36.855	136.924	84.8485	4.769	77.545	90.3226	5.154	125.782	77.7778	13.848	84.928	89.3617	4.014	105.41	92.3077	3.247	104.149	98.8235	2.363	104.386	74.3363	0	98.198	89.3617
85	87.6289	0	137.798	85.8586	7	137.189	72.0339	4.376	81.0174	97.7011	5.905	97.8855	80.9524	0	108.337				70.2479	63.662	110	73.2759	6.304	119.467	86.7347	41.922	134.055	85.8586	5.306	73.98	91.3978	5.973	115.394	78.7037	9.663	87.757	90.4255	4.435	111.078	93.4066	3.45	103.55	100	3.6	109.035	75.2212	0	99.632	90.4255
86	88.6598	0.419	131.319	86.8687	6.377	128.01	72.8814	2.029	82.4962	98.8506	5.601	99.1966	81.9048	0.363	103.933				71.0744	46.457	113.158	74.1379	7	120.421	87.7551	42.522	133.377	86.8687	6	73.502	92.4731	6.91	107.11	79.6296	6.248	94.137	91.4894	4.953	116.337	94.5055	4.45	104.35				76.1062	0	100.681	91.4894
87	89.6907	1.301	126.704	87.8788	5.608	118.317	73.7288	2.56	81.3483	100	5.362	95.2161	82.8571	0.958	97.609				71.9008	37.394	113.777	75	7	124.763	88.7755	41.509	130.751	87.8788	6	74.847	93.5484	7.762	108.447	80.5556	2.873	99.859	92.5532	4.139	115.818	95.6044	5	106.45				76.9912	0	101.491	92.5532
88	90.7216	2.713	122.981	88.8889	5.351	112.652	74.5763	1.678	83.6086				83.8095	0.064	89.769				72.7273	32.842	109.422	75.8621	6.822	126.77	89.7959	40.926	130.516	88.8889	6.256	72.294	94.6237	8.541	113.115	81.4815	0.202	107.709	93.617	4.666	117.34	96.7033	5.45	107				77.8761	0	104.712	93.617
89	91.7526	3	115.639	89.899	5.046	107.171	75.4237	0.861	86.6673				84.7619	0	88.04				73.5537	25.66	106.656	76.7241	5.864	126.542	90.8163	38.746	130.626	89.899	6.981	68.472	95.6989	8.229	127.542	82.4074	0	112.645	94.6809	4.13	120.346	97.8022	6	110.15				78.7611	0	108.201	94.6809
90	92.7835	2.924	111.273	90.9091	5.749	103.3	76.2712	0	90.0813				85.7143	0	90.177				74.3802	16.429	103.054	77.5862	5.007	129.193	91.8367	39.924	131.265	90.9091	7.033	74.55	96.7742	9.045	146.543	83.3333	0	114.102	95.7447	4.248	117.363	98.9011	6	112.65				79.646	0	115.168	95.7447
91	93.8144	2.26	109.417	91.9192	7.102	104.484	77.1186	0	89.2829				86.6667	0	93.456				75.2066	9.005	98.428	78.4483	5.215	124.979	92.8571	42.893	131.747	91.9192	7.876	81.709	97.8495	9.515	151.239	84.2593	0	114.882	96.8085	4.03	120.428	100	6	110.55				80.531	0	123.127	96.8085
92	94.8454	2	106.262	92.9293	7.812	108.645	77.9661	0	85.2282				87.619	0	97.053				76.0331	4.305	100.479	79.3103	5.498	128.027	93.8776	38.445	123.842	92.9293	8.122	86.597	98.9247	8.941	156.204	85.1852	0	114.242	97.8723	4.247	125.771							81.4159	0	127.999	97.8723
93	95.8763	2.049	105.759	93.9394	7.527	112.038	78.8136	0	82.9525				88.5714	0.437	97.924				76.8595	1.253	101.234	80.1724	5.026	131.646	94.898	30.887	114.388	93.9394	7.522	87.445	100	8.185	155.689	86.1111	0	113.23	98.9362	4.545	134.898							82.3009	0	120.712	98.9362
94	96.9072	2.853	107.437	94.9495	8.071	115.767	79.661	0.06	80.6154				89.5238	3.28	97.877				77.686	0	102.119	81.0345	5	132.513	95.9184	21.594	110.758	94.9495	7.825	86.574				87.037	0	113.012	100	4.397	133.922							83.1858	0	114.027	100
95	97.9381	3.398	109.436	95.9596	8.615	125.583	80.5085	1.201	73.9064				90.4762	7.497	96.312				78.5124	0	102.486	81.8966	5	132.705	96.9388	12.712	113.169	95.9596	8.881	89.133				87.963	0	105.241										84.0708	0	106.317
96	98.9691	4	112.118	96.9697	8.908	135.247	81.3559	3.321	66.6877				91.4286	11.866	92.94				79.3388	0	102.597	82.7586	5	131.928	97.9592	6.342	116.23	96.9697	10.684	97.843				88.8889	0	99.533										84.9558	0.213	96.784
97	100	4.503	112.137	97.9798	9	135.521	82.2034	6.049	63.7081				92.381	15.56	88.63				80.1653	0	100.865	83.6207	5	132.661	98.9796	3.439	111.387	97.9798	12.854	107.95				89.8148	0.552	92.746										85.8407	1.033	89.195
98				98.9899	9	132.236	83.0508	7.016	58.3912				93.3333	16.245	88.398				80.9917	0	92.774	84.4828	4.609	132.867	100	3.001	105.178	98.9899	13.503	115.093				90.7407	1.279	86.405										86.7257	1.741	83.693
99				100	8.906	123.966	83.8983	7.402	59.7998				94.2857	11.75	88.174				81.8182	0.005	88.449	85.3448	4.452	130.469				100	12.485	116.551				91.6667	1.726	83.3										87.6106	3.085	81.007
100							84.7458	6.922	61.0719				95.2381	6.661	92.384				82.6446	0.372	83.584	86.2069	4.303	131.637										92.5926	2.173	82.034										88.4956	4.505	83.574
101							85.5932	4.964	63.0503				96.1905	4.291	100.127				83.4711	1.466	75.117	87.069	4.014	131.337										93.5185	2.77	83.611										89.3805	5.886	82.371
102							86.4407	3.989	64.3843				97.1429	3.465	107.192				84.2975	1.758	72.37	87.931	4.576	127.784										94.4444	4.068	89.028										90.2655	6.496	81.686
103							87.2881	3.759	65.8133				98.0952	4.689	105.289				85.124	2.905	73.481	88.7931	5	127.062										95.3704	4.545	90.453										91.1504	6.741	86.266
104							88.1356	4.021	59.1735				99.0476	7.317	104.341				85.9504	3.145	74.836	89.6552	5.303	129.137										96.2963	5.887	87.403										92.0354	6.814	94.203
105							88.9831	4.92	53.0633				100	7.995	100.187				86.7769	4.336	78.017	90.5172	4.948	130.329										97.2222	6.335	83.611										92.9204	5.66	99.578
106							89.8305	5	52.0718										87.6033	4.991	83.212	91.3793	5.155	135.43										98.1481	6.959	77.862										93.8053	5.219	104.636
107							90.678	5	55.6779										88.4298	5	86.963	92.2414	5.25	139.793										99.0741	7.423	76.715										94.6903	3.831	109.544
108							91.5254	5	56.5314										89.2562	5.932	83.363	93.1034	5.232	140.205										100	7.374	74.741										95.5752	3.057	112.187
109							92.3729	4.992	59.2699										90.0826	6.129	84.148	93.9655	5.002	136.69																						96.4602	3.186	109.384
110							93.2203	4.005	61.6742										90.9091	6.147	85.622	94.8276	5.67	128.284																						97.3451	4	107.182
111							94.0678	5	63.334										91.7355	6.349	89.093	95.6897	5.298	124.427																						98.2301	4	107.938
112							94.9153	5.499	63.9984										92.562	5.805	95.008	96.5517	4.535	126.889																						99.115	4.866	102.258
113							95.7627	6.992	63.2539										93.3884	4.997	99.733	97.4138	4	123.94																						100	5.665	102.05
114							96.6102	7.991	64.324										94.2149	4.688	98.283	98.2759	3.777	116.616
115							97.4576	8.739	63.7564										95.0413	6.308	93.045	99.1379	3	110.884
116							98.3051	8.832	65.9596										95.8678	7	86.624	100	3	108.214
117							99.1525	7.038	70.7351										96.6942	7.476	81.859
118							100	6.021	70.0211										97.5207	9.047	81.215
119																			98.3471	9.038	79.458
120																			99.1736	7.943	75.425
121																			100	6.112	73.646
122
123
124
125
126
127
128
129
130
131
132
133
134
135
136
137
138
139
140
141
142
143
144
145
146
147
148
149
150
151
	0			0			0			0			0			0			0			0			0			0			0			0			0			0			0			0			0
	5	7.349	160.317	5	8.9924	173.776	5	8.63517	131.886	5	8.6768	145.62	5	6.999	169.585	5	8.686	222.063	5	5.383	166.447	5	4.0675	191.381	5	7.145	176.417	5	7.7992	177.001	5	7.1434	197.269	5	5.65567	179.784	5	12.6292	224.528	5	4.0182	135.493	5	4.2918	177.78	5	7.428	236.075	5
	10	9.3128	139.51	10	9.926	156.83	10	7.05083	89.9825	10	14.087	149.689	10	15.7322	161.16	10	5.16575	163.076	10	9.80983	137.422	10	8.434	124.781	10	8.9076	148.764	10	19.787	160.721	10	8.613	178.724	10	7.0426	151.805	10	6.2052	148.256	10	4.8538	160.062	10	8.915	161.273	10	10.3262	174.709	10
	15	6.1054	109.838	15	8.8862	103.859	15	7.34867	77.5326	15	13.1576	110.718	15	10.225	132.663	15	4.154	136.038	15	5.49183	123.201	15	5.27583	94.9257	15	5.4786	117.566	15	9.269	114.567	15	11.321	137.353	15	8.88933	102.2	15	6.2076	119.539	15	11.2063	135.254	15	13.835	123.093	15	7.0428	146.484	15
	20	3.89	129.869	20	11.1398	98.2765	20	5.50283	78.3988	20	14.6145	78.3297	20	9.2375	99.8968	20	7.098	115.852	20	5.3845	108.541	20	3.80133	102.423	20	6.0076	120.264	20	8.115	96.6732	20	7.575	104.854	20	5.3844	85.5618	20	6.2145	119.54	20	13.4426	107.625	20	6.8868	99.046	20	4.4355	120.98	20
	25	4.1562	129.625	25	7.3982	96.4941	25	4.7465	74.235	25	8.975	80.7253	25	10.8678	91.5803	25	8.99533	98.695	25	8.6875	102.767	25	3.65383	97.0312	25	10.33	127.444	25	8.8622	92.305	25	5.9244	92.7492	25	8.8165	85.203	25	6.8492	125.355	25	6.894	96.5461	25	4.2018	98.8912	25	6.52283	128.011	25
	30	2.8582	107.681	30	7.8018	105.165	30	3.98833	71.5663	30	8.1952	96.433	30	6.469	104.517	30	3.74225	111.813	30	6.193	96.6762	30	2.12067	105.658	30	15.3248	131.664	30	8.8362	93.0054	30	7.32075	107.28	30	5.61067	88.4282	30	5.7906	123.674	30	4.2836	93.9938	30	2.49875	94.093	30	10.5124	127.832	30
	35	2.5415	114.043	35	7.1648	116.535	35	1.86167	83.2973	35	3.29875	82.1237	35	7.2892	99.669	35	0.447333	113.09	35	3.843	113.854	35	2.24233	119.016	35	3.9588	126.284	35	10.0152	105.629	35	6.8764	112.298	35	5.6516	91.621	35	2.14575	125.336	35	3.3825	89.7005	35	1.6695	101.462	35	10.2377	121.27	35
	40	0.6132	126.355	40	4.7428	127.069	40	0	82.7823	40	1.91825	100.736	40	4.22067	112.744	40	0	111.963	40	0.813333	126.946	40	0	142.072	40	0	132.954	40	7.3834	119.907	40	4.8618	111.38	40	4.7055	106.872	40	0.2096	117.219	40	3.8834	102.567	40	1.759	120.232	40	2.58683	102.048	40
	45	0	118.485	45	0.264	154.673	45	1.52283	68.676	45	0.357	119.9	45	0.1035	122.074	45	0	112.284	45	0.1935	116.97	45	10.5247	122.177	45	0	127.642	45	0.2326	127.312	45	4.9155	133.014	45	3.2166	116.751	45	0	125.836	45	0.96875	112.706	45	0.0444	112.755	45	0.3456	103.894	45
	50	0	145.01	50	19.749	146.151	50	61.4653	53.1196	50	18.8605	110.985	50	0	98.2676	50	14.231	108.497	50	15.768	115.134	50	123.421	101.344	50	22.0018	118.19	50	18.44	116.446	50	14.2262	151.445	50	1.4525	118.863	50	29.075	125.138	50	0	105.019	50	0.261	108.133	50	0	107.64	50
	55	15.6194	149.178	55	102.888	112.165	55	100.905	56.3776	55	66.2015	96.435	55	9.0016	98.0574	55	135.394	113.201	55	77.2608	116.289	55	184.348	90.4675	55	93.2684	96.552	55	119.875	114.767	55	48.0552	146.41	55	29.8605	108.713	55	110.416	125.081	55	3.0746	114.287	55	36.6575	101.274	55	4.595	133.79	55
	60	126.723	114.546	60	199.461	88.9751	60	115.131	54.1104	60	144.091	78.91	60	136.735	101.555	60	199.639	131.326	60	181.957	92.7497	60	33.7003	115.88	60	180.611	94.0151	60	161.708	96.6762	60	92.064	140.883	60	157.622	105.223	60	174.442	101.484	60	92.9115	99.4292	60	131.987	89.6894	60	132.894	102.377	60
	65	142.403	102.646	65	166.599	90.6373	65	61.399	51.3689	65	174.813	80.1061	65	151.988	87.9417	65	204.712	118.518	65	140.626	87.5142	65	0	139.769	65	188.962	90.3249	65	200.191	88.3202	65	123.768	133.276	65	193.116	123.427	65	188.003	102.472	65	201.037	78.5165	65	136.288	86.9356	65	212.609	90.8115	65
	70	160.49	99.906	70	118.736	110.423	70	91.6275	62.84	70	162.175	100.043	70	214.148	78.6648	70	73.1603	104.751	70	154.935	96.767	70	1.16667	120.728	70	170.677	104.5	70	73.3818	69.9008	70	131.497	123.556	70	206.948	107.796	70	185.505	98.1535	70	180.861	80.4878	70	212.75	70.516	70	187.119	88.1803	70
	75	119.705	107.603	75	36.3692	112.902	75	8.31867	80.4239	75	145.16	117.601	75	78.8714	99.2988	75	8.358	110.889	75	37.074	109.344	75	5.94483	118.773	75	65.5276	117.585	75	1.7034	97.304	75	108.087	119.814	75	129.999	104.494	75	24.7426	108.79	75	60.6706	104.271	75	171.727	95.8282	75	20.8962	101.009	75
	80	5.7068	109.979	80	1.5178	135.89	80	0.1535	85.8046	80	59.974	116.362	80	0.292667	116.885	80	0.234333	117.604	80	2.42717	101.224	80	5.901	126.712	80	2.7862	121.198	80	0.1556	100.417	80	21.4046	143.156	80	29.5898	89.7558	80	0	118.623	80	0.26225	112.322	80	9.5638	116.285	80	0	104.981	80
	85	0	130.057	85	4.5486	153.357	85	5.3185	63.9275	85	13.7792	114.009	85	0.230833	100.716	85	0	139.721	85	0.600167	85.5265	85	4.93917	132.387	85	13.8668	126.739	85	3.0192	88.6302	85	5.9362	152.066	85	0.615	109.839	85	0.61275	124.834	85	0	116.595	85	0	123.427	85	0.0355	114.828	85
	90	0.344	134.978	90	5.8764	120.668	90	4.44217	59.5927	90	0.0848	106.459	90	0.7434	95.2974	90	0	125.305	90	4.38483	79.9787	90	4.608	129.571	90	40.7468	133.125	90	6.1086	72.619	90	3.11875	138.792	90	0.092	106.334	90	1.9108	107.117	90	0.598844	108.963	90	0	86.3328	90	3.25	83.968	90
	95	2.5794	113.114	95	7.2522	108.847	95	4.916	60.081	95	0.4595	90.2171	95	12.5836	90.8908	95	0.50575	113.717	95	5.68583	91.9812	95	5.2095	135.122	95	38.179	126.373	95	7.6756	83.375	95	6.868	113.97	95	2.4032	84.8756	95	4.4646	116.184	95	3.4294	105.417	95	0	90.4873	95	5.7935	95.9855	95
	100	3.3606	109.377	100	8.8858	130.511	100	7.60217	66.3417	100	4.7622	95.9696	100	5.73633	101.587	100	1.941	112.434	100	7.56057	81.6103	100	3.935	118.495	100	9.4176	111.344	100	11.6814	105.314	100	8.783	147.443	100	6.4205	81.7975	100	4.2934	126.476	100	5.69	109.36	100	1.5636	99.6448	100	4.129	106.833	100
[truncated: 47 more columns]

## Sheet: Summary
	FISH	PI	FISH	PI	FISH	PI
	Mean	Mean	STDDEV	STDDEV	SEM	SEM
5	7.39936	178.101	2.41747	26.3594	0.441368	4.81255
10	9.43548	147.797	3.27084	21.0416	0.59717	3.84166
15	8.80443	115.847	3.29358	16.93	0.601322	3.09098
20	7.51362	105.249	3.06011	15.0094	0.558698	2.74033
25	7.02176	103.849	2.54531	16.9523	0.464708	3.09505
30	6.252	105.979	2.94897	16.0955	0.538407	2.93862
35	4.67664	108.437	2.63144	14.647	0.480432	2.67417
40	2.2334	114.124	2.36186	14.1332	0.431214	2.58036
45	5.84988	117.479	23.724	15.548	4.33139	2.83866
50	28.932	117.932	44.5649	20.8282	8.13639	3.80269
55	78.7205	113.568	60.0348	22.0603	10.9608	4.02764
60	137.695	103.24	51.3008	20.1516	9.3662	3.67917
65	141.251	97.806	56.8672	20.0404	10.3825	3.65886
70	123.194	99.3066	64.3801	20.5367	11.7541	3.74947
75	61.8614	110.842	57.4764	16.8156	10.4937	3.07009
80	13.7373	115.483	33.6921	14.6248	6.15131	2.67011
85	5.70212	118.36	14.6667	20.0602	2.67776	3.66247
90	4.94765	110.193	7.25255	23.8422	1.32413	4.35296
95	6.29424	105.515	6.65314	20.2219	1.21469	3.69199
100	5.94563	109.616	2.58225	20.0502	0.471452	3.66065
