# Supplementary material for: Large domains of heterochromatin direct the formation of short mitotic chromosome loops
Source: eLife. 2020 Sep 11;9:e57212. doi: 10.7554/eLife.57212 (PMC7515631; doi:10.7554/eLife.57212)
Supplement: Figure 5—source data 6. [file elife-57212-fig5-data6.xlsx]

## Sheet: All
1	FISH		PI	2	FISH		PI	3	FISH		PI	4	FISH		PI	5	FISH		PI	6	FISH		PI	7	FISH		PI	8	FISH		PI	9	FISH		PI	10	FISH		PI	11	FISH		PI	13	FISH		PI	14	FISH
X	Y	X	Y	X	Y	X	Y	X	Y	X	Y	X	Y	X	Y	X	Y	X	Y	X	Y	X	Y	X	Y	X	Y	X	Y	X	Y	X	Y	X	Y	X	Y	X	Y	X	Y	X	Y	X	Y	X	Y	X	Y
0	2	0	156	0	7	0	211	0	3	0	179	0	11	0	193	0	1	0	176	0	2	0	136	0	1	0	157	0	2	0	144	0	3	0	164	0	4	0	171	0	2	0	154	0	12	0	138	0	1
1	2.978	1	149.068	1	5.443	1	214.204	1	2.973	1	184.438	1	11	1	198.186	1	1	1	193.604	1	2	1	136	1	1	1	159.9	1	2	1	149.656	1	2.244	1	173.181	1	3.086	1	160.616	1	2	1	164.862	1	18.684	1	136.658	1	1.293
2	2.956	2	149.911	2	3.885	2	203.853	2	3.22	2	187.175	2	9.587	2	199.834	2	1	2	199.445	2	2	2	135.405	2	1	2	160.19	2	2	2	145.001	2	2.31	2	174.235	2	3.994	2	143.119	2	2	2	175.843	2	22.528	2	135.216	2	1
3	3.866	3	149.467	3	2.335	3	181.376	3	2.886	3	188.644	3	7.022	3	192.468	3	1.865	3	191.118	3	2	3	130.305	3	1	3	156.057	3	2.623	3	138.313	3	2.707	3	170.531	3	5.733	3	137.552	3	1.181	3	168.738	3	20.536	3	134.916	3	1.043
4	3.911	4	135.569	4	2.072	4	151.106	4	3.228	4	169.356	4	5.297	4	180.997	4	4.176	4	181.949	4	2.177	4	119.599	4	1.007	4	149.734	4	2.99	4	129.893	4	3.239	4	161.663	4	6.654	4	136.014	4	1	4	155.962	4	14.374	4	130.791	4	0.501
5	3.778	5	124.125	5	2	5	121.239	5	3.785	5	152.742	5	5.049	5	170.703	5	7.44	5	172.632	5	4.048	5	113.042	5	1.085	5	141.859	5	3.996	5	123.502	5	4.763	5	161.764	5	7.976	5	137.799	5	1.682	5	149.588	5	8.311	5	120.355	5	0
6	2.868	6	111.685	6	2.012	6	100.273	6	5.142	6	141.078	6	4.638	6	160.602	6	12.512	6	158.567	6	6.972	6	104.957	6	1	6	129.751	6	5.196	6	121.247	6	7.819	6	153.209	6	9.467	6	137.993	6	2.897	6	147.532	6	5.269	6	106.632	6	0.685
7	2.844	7	94.43	7	2.607	7	84.192	7	7.398	7	137.6	7	4.04	7	143.29	7	16.951	7	152.059	7	9.467	7	95.4858	7	1.732	7	122.595	7	6.516	7	122.82	7	12.382	7	132.008	7	13.076	7	145.156	7	6.037	7	146.169	7	2.913	7	89.2241	7	1.093
8	3.82	8	83.444	8	2.803	8	74.454	8	8.498	8	137.087	8	3.27	8	122.215	8	22.132	8	151.615	8	10.71	8	85.4869	8	2.315	8	123.007	8	7.397	8	116.998	8	16.148	8	108.18	8	15.919	8	148.914	8	9.805	8	140.442	8	1.821	8	75.8643	8	1.25
9	4.798	9	80.407	9	2.986	9	68.607	9	8.193	9	130.915	9	2.526	9	105.315	9	26.923	9	141.818	9	10.342	9	76.5477	9	3.721	9	124.393	9	8.859	9	109.315	9	15.292	9	87.224	9	14.549	9	132.052	9	13.4	9	131.056	9	1.709	9	67.1159	9	0.794
10	5.775	10	81.664	10	3.742	10	65.62	10	6.94	10	122.541	10	2.195	10	94.088	10	25.348	10	126.855	10	7.905	10	70.1388	10	4.982	10	114.975	10	10.923	10	106.633	10	13.407	10	74.623	10	10.963	10	117.01	10	15.352	10	122.216	10	1.839	10	65.3214	10	0.609
11	5.756	11	85.988	11	4.774	11	70.279	11	5.897	11	112.13	11	2	11	83.773	11	19.589	11	109.251	11	5.876	11	66.3793	11	5.018	11	104.744	11	11.347	11	104.131	11	12.515	11	70.968	11	6.27	11	105.178	11	14.173	11	106.178	11	3.427	11	70.6126	11	0.128
12	4.005	12	91.051	12	5.012	12	77.997	12	4.945	12	104.118	12	2.54	12	74.42	12	11.08	12	91.112	12	4.946	12	65.7156	12	4.061	12	90.5475	12	9.736	12	95.3224	12	12.249	12	71.589	12	3.128	12	94.436	12	10.618	12	90.852	12	6.256	12	77.1846	12	0
13	3.003	13	95.142	13	4.705	13	86.916	13	3.262	13	101.746	13	2.65	13	67.106	13	5.16	13	79.367	13	3.618	13	68.9694	13	3.464	13	79.3348	13	7.101	13	86.3302	13	13.134	13	75.701	13	2.422	13	81.542	13	7.925	13	83.588	13	10.544	13	78.9755	13	0
14	2.003	14	94.934	14	4.509	14	97.721	14	2.001	14	110.185	14	2.713	14	63.455	14	4.894	14	75.311	14	2.911	14	71.3339	14	4.367	14	74.0936	14	3.874	14	79.7983	14	13.509	14	82.278	14	2.135	14	74.345	14	4.874	14	80.345	14	17.309	14	81.5738	14	0
15	1.336	15	94.667	15	5	15	105.724	15	2	15	111.768	15	3.494	15	64.245	15	6.448	15	74.219	15	2.306	15	71.632	15	7.726	15	76.82	15	2.011	15	74.9881	15	17.906	15	87.359	15	1.978	15	71.509	15	4.012	15	81.712	15	17.189	15	80.9115	15	0
16	1.355	16	94.201	16	4.671	16	112.976	16	2.806	16	111.893	16	4	16	67.92	16	7.822	16	72.514	16	2.239	16	71.1222	16	13.957	16	80.1491	16	0.812	16	72.7385	16	25.991	16	88.608	16	2	16	69.935	16	4.582	16	86.281	16	13.377	16	79.6894	16	0
17	1.997	17	92.895	17	4.633	17	122.164	17	4.411	17	117.289	17	4	17	69.52	17	7.602	17	74.434	17	3.348	17	70.3724	17	22.499	17	84.3571	17	0.077	17	73.9239	17	36.938	17	89.487	17	2	17	67.321	17	5	17	89.026	17	8.777	17	79.0685	17	0
18	2	18	93.796	18	4.999	18	133.184	18	5.37	18	118.949	18	4	18	70.44	18	6.754	18	77.668	18	4.727	18	71.1249	18	28.793	18	89.8057	18	0	18	76.3592	18	40.444	18	86.615	18	3.115	18	69.725	18	4.391	18	89.485	18	7.191	18	77.3693	18	0
19	2.42	19	101.077	19	6.763	19	142.492	19	4.169	19	120.456	19	4	19	74.4	19	6.395	19	77.692	19	5.904	19	69.3291	19	26.082	19	91.8568	19	0	19	78.9232	19	36.509	19	84.427	19	4.801	19	77.112	19	2.679	19	89.131	19	10.904	19	76.6693	19	0
20	3.439	20	108.409	20	7.633	20	156.589	20	3.042	20	116.438	20	4	20	77	20	6.754	20	79.412	20	4.856	20	68.0124	20	19.196	20	97.1672	20	0	20	80.7171	20	29.793	20	82.814	20	6.228	20	81.674	20	0.539	20	87.56	20	17.878	20	79.9161	20	0
21	2.472	21	107.671	21	10.246	21	173.613	21	2.401	21	116.392	21	3.52	21	78.44	21	5.746	21	85.641	21	3.598	21	67.6037	21	12.88	21	101.125	21	0	21	83.2386	21	23.855	21	83.255	21	7.197	21	87.781	21	0.0008028	21	88.121	21	23.969	21	84.9415	21	0
22	2.489	22	97.588	22	11.82	22	177.82	22	2.326	22	123.871	22	2.52	22	78.08	22	4.082	22	90.848	22	2.06	22	72.0713	22	9.466	22	98.5038	22	0	22	85.5521	22	16.07	22	81.403	22	7.782	22	96.186	22	0	22	88.879	22	25.739	22	88.9483	22	0
23	4.013	23	85.071	23	14.46	23	178	23	2.92	23	132.878	23	2	23	74.56	23	3.236	23	91.709	23	1.094	23	76.7173	23	9.207	23	99.6637	23	0	23	88.0275	23	10.387	23	79.243	23	8.202	23	105.057	23	0	23	91.321	23	21.567	23	92.5145	23	0
24	8.573	24	73.071	24	15.82	24	175.54	24	2.981	24	139.783	24	1.52	24	73	24	3.246	24	90.702	24	1.588	24	81.5609	24	11.703	24	110.805	24	0	24	90.9598	24	9.296	24	83.258	24	7.775	24	109.561	24	0.465	24	91.652	24	15.303	24	95.0556	24	0
25	14.187	25	63.062	25	16.82	25	167.62	25	3.123	25	137.551	25	1	25	72.04	25	4.91	25	90.277	25	2.191	25	84.5491	25	13.678	25	105.602	25	0	25	92.6596	25	11.093	25	91.45	25	7.706	25	108.604	25	0.778	25	88.903	25	13.945	25	94.3529	25	0
26	17.137	26	54.632	26	14.54	26	160.26	26	2.763	26	126.778	26	1	26	69.08	26	4.809	26	90.727	26	2.781	26	82.7688	26	11.6	26	99.1143	26	0	26	90.2007	26	14.502	26	93.688	26	6.593	26	108.03	26	0.914	26	86.084	26	21.239	26	93.8901	26	0
27	17.995	27	47.646	27	13.18	27	160.64	27	1.973	27	116.186	27	1	27	66.04	27	4.716	27	92.573	27	3	27	82.76	27	6.213	27	93.044	27	0	27	85.3873	27	17.83	27	94.889	27	4.422	27	112.012	27	1.176	27	83.847	27	40.026	27	91.9801	27	0
28	12.041	28	43.274	28	13	28	157.72	28	1.238	28	108.832	28	1.96	28	62.12	28	4.467	28	95.919	28	2.24	28	79.2	28	1.115	28	88.9064	28	0	28	83.6754	28	16.199	28	88.989	28	2.046	28	120.202	28	1.742	28	84.629	28	63.98	28	91.8736	28	0.328
29	6.043	29	43.575	29	12.18	29	152.08	29	2.452	29	111.328	29	3.96	29	59	29	3.548	29	96.472	29	2	29	78	29	0	29	87.8748	29	0	29	80.7161	29	15.236	29	85.479	29	0.085	29	125.616	29	2	29	85.414	29	86.341	29	98.6576	29	3.353
30	3.022	30	48.298	30	9.54	30	149.36	30	4.404	30	114.015	30	5	30	62.36	30	2.629	30	93.417	30	2	30	75.72	30	0	30	91.3824	30	0	30	78.0239	30	13.911	30	86.148	30	0	30	134.312	30	1.677	30	85.005	30	106.946	30	108.558	30	14.271
31	1.015	31	55.876	31	5.72	31	146.54	31	6.153	31	120.598	31	3.56	31	70.32	31	1.829	31	88.419	31	2	31	71.2	31	0	31	99.7689	31	0	31	78.2654	31	12.102	31	86.15	31	0	31	139.554	31	0.622	31	85.001	31	111.464	31	116.77	31	36.038
32	0.008	32	63.54	32	1.72	32	150.1	32	5.734	32	133.213	32	1.04	32	78.84	32	1.845	32	85.54	32	2	32	68.48	32	0	32	108.659	32	0	32	78.7006	32	10.638	32	86.677	32	0	32	139.267	32	0	32	86.41	32	93.308	32	119.686	32	64.554
33	0	33	70.345	33	0.18	33	153.46	33	4.289	33	138.9	33	0	33	85.88	33	2.129	33	83.372	33	1.24	33	71.04	33	0	33	115.671	33	0	33	75.4114	33	11.695	33	80.807	33	0	33	138.912	33	0	33	89.252	33	63.218	33	125.621	33	91.522
34	0.749	34	73.926	34	0	34	154	34	3.07	34	138.561	34	0	34	89.48	34	3	34	81.264	34	0.24	34	76.56	34	0	34	119.862	34	0	34	72.5084	34	10.932	34	79.063	34	0.235	34	135.916	34	0	34	92.434	34	33.084	34	128.871	34	119.723
35	1.769	35	76.533	35	0.82	35	149.08	35	1.714	35	140.982	35	0	35	87.6	35	3	35	78.113	35	0	35	78.76	35	0	35	123.088	35	0	35	72.9534	35	7.702	35	80.023	35	0.837	35	128.61	35	0	35	94.673	35	14.924	35	130.763	35	157.196
36	5.367	36	76.797	36	3.46	36	137.34	36	0.243	36	140.243	36	0	36	83.259	36	3.38	36	78.883	36	0	36	79.76	36	0	36	129.233	36	0	36	74.3577	36	3.292	36	80.9	36	3.313	36	126.483	36	0	36	96.183	36	7.307	36	136.654	36	193.073
37	7.448	37	75.721	37	12.2	37	124.34	37	0	37	145.31	37	0	37	82.246	37	2.968	37	85.155	37	0	37	80.76	37	1.892	37	131.405	37	0	37	74.652	37	1.348	37	79.599	37	5.559	37	127.901	37	0	37	97.429	37	4.377	37	140.514	37	213.149
38	8.369	38	76.768	38	29.58	38	119.54	38	0	38	151.055	38	0	38	83.538	38	3.168	38	94.484	38	0	38	77.2	38	4.918	38	128.286	38	0	38	82.7151	38	0.992	38	80.318	38	7.26	38	134.816	38	0	38	99.102	38	3.159	38	140.841	38	204.435
39	6.75	39	83.865	39	51.86	39	113.26	39	0	39	149.359	39	0	39	84.099	39	3.923	39	100.903	39	0	39	72.2	39	9.856	39	121.982	39	0	39	90.6311	39	0.408	39	84.287	39	9.55	39	130.371	39	0	39	100.279	39	4.635	39	138.573	39	185.049
40	4.797	40	89.61	40	73.22	40	102.16	40	0	40	151.169	40	0	40	85.814	40	4.936	40	108.344	40	0	40	71	40	17.038	40	113.562	40	0	40	97.3013	40	0	40	83.328	40	14.873	40	120.437	40	0.452	40	98.965	40	9.886	40	131.755	40	158.545
41	3.018	41	92.24	41	94.22	41	91.8	41	0	41	146.632	41	0	41	80.894	41	5.168	41	114.675	41	0	41	73.28	41	26.941	41	108.275	41	0.122	41	108.701	41	0	41	81.31	41	33.316	41	114.148	41	2.836	41	92.183	41	27.714	41	124.975	41	137.577
42	3	42	85.538	42	113.58	42	82.62	42	0	42	134.41	42	0	42	76.798	42	5.342	42	115.235	42	0	42	76.28	42	39.904	42	104.785	42	2.101	42	113.09	42	0	42	78.316	42	71.11	42	114.737	42	7.942	42	85.244	42	50.571	42	115.257	42	135.202
43	4.078	43	76.497	43	132.58	43	76.9	43	0	43	119.721	43	0.257	43	75.033	43	3.809	43	110.862	43	0	43	79.28	43	60.437	43	107.61	43	7.601	43	110.153	43	0	43	76.27	43	120.937	43	108.852	43	18.95	43	81.529	43	80.485	43	106.064	43	139.208
44	7.012	44	77.125	44	149.12	44	70.26	44	0	44	110.89	44	1.417	44	80.342	44	1.117	44	105.666	44	0	44	81.52	44	93.297	44	108.408	44	16.263	44	101.391	44	0.061	44	78.192	44	147.101	44	101.982	44	34.5	44	78.718	44	108.157	44	99.8134	44	137.203
45	7.99	45	79.968	45	167.58	45	63.26	45	0	45	110.838	45	4.405	45	81.345	45	0	45	98.944	45	0	45	79.72	45	137.94	45	98.2677	45	36.023	45	95.2447	45	0.041	45	83.503	45	150.124	45	95.294	45	50.36	45	78.068	45	138.039	45	97.0017	45	126.828
46	4.312	46	86.504	46	165.26	46	58.72	46	0	46	116.569	46	11.045	46	76.798	46	0	46	99.64	46	3.8	46	81.28	46	182.845	46	89.9593	46	74.156	46	86.2709	46	0	46	93.009	46	145.068	46	85.839	46	69.516	46	71.525	46	159.06	46	98.074	46	118.281
47	1.381	47	90.197	47	150.88	47	58	47	2.3	47	121.834	47	24.114	47	74.983	47	0	47	105.125	47	14.88	47	82.76	47	210.904	47	85.9333	47	126.243	47	75.3691	47	0	47	105.412	47	141.244	47	71.73	47	92.936	47	67.32	47	174.593	47	96.4569	47	106.541
48	0.843	48	87.998	48	139.8	48	60.46	48	11.141	48	128.646	48	46.268	48	76.266	48	0	48	104.462	48	39.28	48	78.44	48	209.722	48	84.3547	48	169.053	48	67.2468	48	0	48	111.413	48	128.243	48	63.888	48	128.366	48	64.718	48	173.272	48	94.7541	48	95.81
49	1.966	49	81.08	49	136.36	49	64.28	49	30.624	49	130.768	49	76.481	49	77.209	49	0	49	104.667	49	75.64	49	74.72	49	210.196	49	78.9695	49	191.195	49	60.6824	49	0.324	49	115.402	49	114.285	49	58.791	49	171.705	49	63.244	49	175.705	49	93.7408	49	78.288
50	6.478	50	72.82	50	138.46	50	69.92	50	55.039	50	131.024	50	114.55	50	79.445	50	0	50	99.293	50	110.08	50	69.44	50	204.755	50	78.8606	50	198.377	50	53.8518	50	2.761	50	113.514	50	125.431	50	54.663	50	201.183	50	66.672	50	183.177	50	89.2824	50	58.535
51	16.124	51	62.517	51	133.26	51	73.46	51	78.802	51	134.526	51	167.028	51	82.665	51	0	51	94.233	51	135.48	51	64.2	51	189.598	51	84.8645	51	204.714	51	52.0873	51	11.194	51	110.288	51	166.478	51	48.824	51	209.332	51	70.609	51	198.175	51	80.594	51	44.935
52	29.086	52	54.561	52	118.88	52	74	52	96.017	52	134.872	52	214.385	52	86.746	52	0	52	89.224	52	156.96	52	60.72	52	164.972	52	90.3471	52	194.704	52	52.7195	52	24.763	52	104.991	52	207.27	52	45.272	52	192.053	52	70.114	52	208.186	52	70.7384	52	44.643
53	41.2	53	51.918	53	116.82	53	76.46	53	105.127	53	135.437	53	240.338	53	90.87	53	1.094	53	81.938	53	174.16	53	57.72	53	148.527	53	92.3462	53	175.501	53	54.8885	53	36.713	53	97.179	53	215.242	53	47.627	53	171.335	53	74.944	53	211.566	53	63.636	53	45.581
54	50.464	54	49.312	54	122.74	54	81.1	54	108.012	54	135.234	54	230.325	54	93.019	54	7.85	54	75.625	54	181.04	54	56.24	54	129.415	54	90.8804	54	151.908	54	61.1326	54	46.544	54	88.361	54	202.448	54	50.316	54	156.788	54	73.596	54	192.756	54	59.4234	54	40.891
55	60.172	55	47.242	55	128.1	55	84.46	55	118.053	55	125.611	55	192.259	55	98.53	55	22.825	55	72.581	55	178.96	55	57.52	55	106.426	55	91.5701	55	135.71	55	65.3673	55	50.476	55	85.447	55	179.846	55	52.045	55	158.074	55	75.545	55	161.174	55	54.6545	55	28.369
56	85.257	56	46.376	56	122.44	56	89.92	56	130.794	56	114.243	56	159.731	56	106.288	56	47.059	56	69.981	56	172.68	56	62.56	56	103.179	56	92.2524	56	143.363	56	65.5304	56	50.994	56	87.463	56	150.405	56	52.629	56	176.919	56	78.435	56	122.878	56	52.4357	56	16.82
57	129.176	57	44.097	57	131.66	57	95.1	57	154.315	57	103.025	57	150.404	57	107.44	57	68.671	57	68.458	57	157.32	57	65.52	57	119.549	57	95.9098	57	166.065	57	65.6201	57	55.15	57	79.411	57	125.099	57	55.939	57	190.374	57	81.115	57	95.581	57	54.5578	57	8.85
58	176.679	58	42.686	58	142.2	58	98.46	58	178.379	58	95.8427	58	150.417	58	102.622	58	79.377	58	67.135	58	143.88	58	68.28	58	147.534	58	98.3868	58	195.575	58	69.2836	58	67.683	58	74.695	58	95.069	58	65.4	58	188.742	58	86.372	58	84.318	58	59.2115	58	3.843
59	208.528	59	43.073	59	130.06	59	102.28	59	195.512	59	98.8308	59	140.556	59	98.347	59	88.71	59	66.471	59	134.92	59	65.96	59	176.961	59	98.8176	59	195.979	59	68.8713	59	93.132	59	69.176	59	72.725	59	76.766	59	167.855	59	89.409	59	84.209	59	62.412	59	1.884
60	208.197	60	45.059	60	99.94	60	102.18	60	186.17	60	99.5377	60	134.288	60	94.734	60	103.165	60	67.54	60	135.28	60	61.96	60	179.053	60	94.4023	60	175.828	60	68.804	60	120.241	60	62.875	60	61.879	60	81.044	60	147.984	60	89.982	60	88.668	60	65.0639	60	2.815
61	179.466	61	49.139	61	60.38	61	104.46	61	170.957	61	102.162	61	131.295	61	92.632	61	117.242	61	64.777	61	140.56	61	57.2	61	148.482	61	84.9185	61	147.033	61	71.6722	61	147.648	61	58.147	61	54.708	61	74.794	61	142.707	61	90.038	61	92.421	61	66.5199	61	5.084
62	170.8	62	52.405	62	25.12	62	108.28	62	161.807	62	108.761	62	130.046	62	92.584	62	132.118	62	58.711	62	140.48	62	56.76	62	104.588	62	79.5348	62	113.987	62	74.9177	62	183.047	62	56.75	62	41.787	62	74.092	62	150.629	62	90.341	62	77.841	62	66.6471	62	6.636
63	187.23	63	54.6	63	5.955	63	104.502	63	165.761	63	124.571	63	128.885	63	93.919	63	133.446	63	53.656	63	130.12	63	58.52	63	69.728	63	80.5101	63	79.187	63	76.7948	63	218.472	63	60.156	63	22.575	63	76.024	63	161.118	63	93.445	63	61.949	63	66.3876	63	6.56
64	205.377	64	54.233	64	0.588	64	98.631	64	175.403	64	139.014	64	115.628	64	93.682	64	126.022	64	51.7	64	116.36	64	61.28	64	39.688	64	88.2101	64	49.386	64	80.3492	64	246.985	64	64.469	64	7.527	64	73.31	64	147.32	64	97.662	64	41.789	64	72.1667	64	5.12
65	221.648	65	56.608	65	0	65	93.192	65	189.215	65	133.189	65	96.116	65	90.15	65	126.938	65	53.46	65	97.457	65	65.7053	65	16.876	65	94.3944	65	29.218	65	79.0382	65	252.92	65	69.892	65	1.112	65	70.801	65	108.098	65	99.415	65	23.219	65	80.4663	65	3.12
66	233.263	66	59.521	66	0	66	89.76	66	191.371	66	133.789	66	71.194	66	85.345	66	131.055	66	56.332	66	69.348	66	67.9529	66	4.169	66	100.989	66	21.776	66	80.4891	66	225.454	66	75.856	66	0	66	69.939	66	67.586	66	102.8	66	9.989	66	89.0215	66	1.12
67	232.138	67	64.661	67	0	67	88.214	67	186.111	67	144.381	67	50.802	67	81.181	67	139.07	67	62.443	67	42.99	67	66.1858	67	0.567	67	102.221	67	18.121	67	77.8769	67	186.925	67	86.887	67	0	67	69.522	67	38.822	67	106.783	67	2.382	67	94.0279	67	0
68	231.012	68	68.355	68	0	68	87.006	68	168.144	68	150.432	68	38	68	76.02	68	151.064	68	67.748	68	25.51	68	64.4893	68	0	68	104.502	68	15.193	68	78.4227	68	158.83	68	93.221	68	0	68	67.136	68	24.07	68	107.276	68	0	68	94.7569	68	0
69	220.77	69	68.646	69	0	69	86.723	69	141.555	69	149.674	69	35.328	69	76.281	69	153.263	69	70.457	69	12.174	69	63.6906	69	0	69	107.789	69	10.204	69	75.8958	69	161.075	69	91.373	69	0	69	61.368	69	16.624	69	106.354	69	0	69	94.4577	69	0
70	189.917	70	71.174	70	0	70	91.735	70	106.677	70	151.111	70	39.404	70	81.624	70	145.807	70	73.27	70	3.478	70	63.2839	70	0	70	109.222	70	4.714	70	75.6378	70	173.628	70	90.862	70	0	70	60.36	70	10.636	70	102.58	70	0	70	99.1562	70	0
71	151.338	71	78.137	71	0	71	98.823	71	74.543	71	149.002	71	44.798	71	81.662	71	135.338	71	79.332	71	0.47	71	63.319	71	0	71	112.434	71	1.005	71	79.389	71	164.432	71	87.975	71	0	71	63.188	71	7.217	71	96.457	71	0	71	99.9848	71	0
72	117.047	72	90.73	72	0	72	98.317	72	47.073	72	143.445	72	40.379	72	81.568	72	112.938	72	86.677	72	0	72	65.6633	72	0	72	112.497	72	0	72	87.8424	72	131.406	72	84.39	72	1.105	72	69.06	72	5.331	72	93.937	72	0.387	72	100.682	72	0
73	90.027	73	109.026	73	0	73	98.128	73	21.546	73	138.285	73	28.864	73	78.395	73	84.304	73	95.752	73	0	73	71.0809	73	0	73	106.865	73	0	73	95.6532	73	99.45	73	87.737	73	1.541	73	77.301	73	3.262	73	90.333	73	1.999	73	101	73	0
74	69.188	74	119.011	74	0	74	100.503	74	6.545	74	128.488	74	17.239	74	78.493	74	49.977	74	101.075	74	0	74	75.2096	74	0	74	102.426	74	0	74	106.544	74	77.401	74	92.807	74	1.555	74	79.638	74	1.193	74	84.843	74	3.546	74	100.901	74	0.44
75	52.089	75	122.947	75	0	75	104.336	75	0.913	75	117.007	75	9.682	75	80.591	75	20.869	75	99.81	75	0	75	74.6106	75	0	75	99.5636	75	0	75	110.627	75	61.95	75	99.115	75	1.035	75	80.489	75	0.625	75	80.809	75	2.972	75	102.714	75	1
76	38.66	76	121.455	76	0	76	104.73	76	0.026	76	107.171	76	2.727	76	85.969	76	5.376	76	94.575	76	0	76	72.2372	76	0	76	98.9252	76	0	76	117.299	76	44.899	76	99.78	76	0.594	76	81.944	76	0.182	76	81.198	76	2.016	76	103.735	76	1.44
77	28.351	77	113.098	77	0	77	99.237	77	0	77	101.228	77	0.208	77	93.389	77	1.236	77	92.24	77	0	77	79.6588	77	0	77	95.8714	77	0.363	77	120.212	77	24.507	77	105.535	77	0.106	77	81.692	77	0	77	86.255	77	1.564	77	100.615	77	2
78	19.345	78	107.517	78	0	78	95.62	78	0	78	104.305	78	0	78	97.761	78	0.069	78	93.849	78	0	78	82.0862	78	0	78	92.6279	78	1.09	78	117.046	78	8.523	78	103.848	78	0.069	78	80.037	78	0	78	95.853	78	1.264	78	96.8569	78	2
79	11.65	79	109.501	79	0	79	93.62	79	0	79	104.532	79	0	79	102.1	79	0	79	97.345	79	0	79	81.649	79	0	79	91.0549	79	1.601	79	113.665	79	1.166	79	101.16	79	0.745	79	80.599	79	0	79	104.872	79	0.964	79	95.8555	79	2
80	5.711	80	113.274	80	0	80	97.83	80	0	80	100.318	80	0	80	106.129	80	0	80	103.468	80	0	80	80.7338	80	0	80	91.0028	80	2.956	80	114.224	80	0	80	104.564	80	1	80	87.705	80	0	80	112.243	80	1.615	80	96.8713	80	2
81	1.945	81	113.921	81	0.69	81	100	81	0	81	96.3167	81	0	81	106.58	81	0	81	107.484	81	0	81	76.9044	81	0	81	92.1161	81	2.031	81	115.07	81	0	81	103.614	81	1	81	101.922	81	2.063	81	117.202	81	1.947	81	102.689	81	2.44
82	0.48	82	112.835	82	1	82	100	82	0	82	99.1574	82	0	82	105.762	82	0	82	107.423	82	0	82	73.4137	82	1.274	82	93.1121	82	1.217	82	117.965	82	0	82	104.139	82	1.87	82	108.405	82	5.38	82	119.513	82	2.55	82	106.526	82	3.905
83	0.024	83	105.78	83	1	83	102.07	83	0	83	107.925	83	0	83	102.441	83	0	83	100.585	83	0	83	74.0785	83	4.007	83	96.0638	83	1	83	115.154	83	0	83	108.584	83	3.545	83	108.275	83	8.634	83	119.902	83	3.078	83	110.268	83	6.515
84	0	84	95.871	84	1	84	103	84	0	84	110.685	84	0	84	96.761	84	0	84	89.727	84	0	84	74.0034	84	9.107	84	99.2168	84	1	84	109.016	84	0	84	110.635	84	6.702	84	100.531	84	8.997	84	119.021	84	4.139	84	106.367	84	8.249
85	0	85	93.725	85	1	85	107.83	85	0	85	105.523	85	0	85	92.799	85	0	85	83.689	85	0	85	75.4155	85	16.895	85	99.087	85	1	85	104.765	85	0	85	112.668	85	8.956	85	95.907	85	5.776	85	113.716	85	5.435	85	103.41	85	7.139
86	0	86	98.843	86	1	86	111.38	86	0	86	97.3652	86	0	86	94.589	86	0	86	83.225	86	0	86	74.3641	86	25.944	86	96.7764	86	1.394	86	100.788	86	0	86	114.087	86	8.805	86	91.889	86	2.64	86	109.47	86	7.089	86	103.096	86	4.928
87	0	87	104.773	87	1	87	104.41	87	0	87	92.8234	87	0	87	97.009	87	0	87	86.511	87	0	87	70.2635	87	30.292	87	97.0751	87	2	87	95.8945	87	0	87	113.841	87	7.363	87	88.41	87	1.291	87	106.61	87	7.05	87	107.555	87	4
88	0.053	88	105.017	88	1	88	98.24	88	0	88	92.595	88	0	88	97.122	88	0	88	91.099	88	0.086	88	67.6479	88	28.505	88	90.7524	88	1.619	88	90.075	88	0	88	114.968	88	5.014	88	87.607	88	1.376	88	103.305	88	7.465	88	114.465	88	3.767
89	0.787	89	105.199	89	1	89	98.38	89	0	89	95.2251	89	0	89	89.617	89	0	89	97.803	89	0	89	63.5978	89	21.604	89	84.9745	89	1.273	89	82.7849	89	0	89	112.624	89	3.712	89	89.781	89	3.37	89	102.247	89	9.203	89	121.276	89	3.19
90	1.841	90	108.856	90	1.69	90	99.69	90	0	90	97.7507	90	0	90	79.365	90	0	90	103.016	90	0	90	60.798	90	12.392	90	87.8178	90	1.999	90	81.5375	90	0.236	90	105.781	90	3.005	90	90.995	90	6.215	90	102.308	90	15.066	90	122.388	90	3.28
91	0.766	91	106.9	91	2	91	102.07	91	0.054	91	106.219	91	0	91	70.92	91	0	91	103.99	91	0.345	91	60.1412	91	5.102	91	94.7035	91	1.39	91	82.4645	91	1.909	91	102.925	91	2.791	91	88.759	91	7.607	91	99.402	91	23.326	91	120.299	91	3.029
92	0.688	92	103.43	92	2	92	105.76	92	0.87	92	115.322	92	0	92	68.594	92	0.392	92	103.869	92	0.983	92	63.4073	92	1.96	92	92.9454	92	1.812	92	81.3516	92	4.818	92	99.493	92	3.409	92	81.892	92	7.73	92	93.075	92	31.169	92	116.921	92	2.415
93	0.716	93	98.627	93	2	93	102.86	93	1.544	93	119.445	93	0	93	72.71	93	0.964	93	99.573	93	1.51	93	63.635	93	1.624	93	91.401	93	2	93	87.4448	93	7.025	93	95.54	93	4.116	93	72.361	93	14.18	93	91.815	93	30.241	93	113.558	93	2.165
94	0	94	92.194	94	3.38	94	96.17	94	3.657	94	116.902	94	0	94	79.568	94	1	94	95.947	94	1.41	94	62.7069	94	1.303	94	88.7383	94	2	94	94.3606	94	7.52	94	93.349	94	4.824	94	67.073	94	28.21	94	93.988	94	24.198	94	106.259	94	2
95	0	95	83.774	95	4	95	94.69	95	5	95	119.62	95	0	95	84.365	95	1.671	95	95.859	95	1.288	95	63.2093	95	1.907	95	89.1229	95	2	95	96.1191	95	5.432	95	89.353	95	4.469	95	68.473	95	43.487	95	93.845	95	16.649	95	100.273	95	2.374
96	0	96	74.027	96	3.31	96	94.31	96	5	96	122.576	96	0.009	96	85.792	96	1.981	96	95.117	96	1.019	96	63.6029	96	2.766	96	87.7139	96	2.076	96	98.8489	96	3.942	96	87.973	96	4.181	96	74.713	96	48.768	96	93.799	96	13.388	96	101.833	96	2.044
97	0	97	69.356	97	3	97	90.55	97	4.154	97	127.216	97	0.067	97	84.916	97	3.261	97	95.481	97	1	97	66.9835	97	2.949	97	83.3232	97	2.326	97	102.296	97	3.24	97	87.748	97	4.052	97	76.835	97	35.09	97	89.94	97	11.088	97	97.0216	97	2.262
98	0	98	67.189	98	2.31	98	89.69	98	2.852	98	127.55	98	0.868	98	84.017	98	3.513	98	96.14	98	1.108	98	69.7767	98	3	98	80.2786	98	3.229	98	104.392	98	2.673	98	94.043	98	3.773	98	74.421	98	20.147	98	87.76	98	7.423	98	93.9389	98	2.397
99	0	99	65.446	99	2	99	92.07	99	2.18	99	119.377	99	0.757	99	88.285	99	2.7	99	97.893	99	1.151	99	66.0514	99	2.726	99	77.0559	99	4.395	99	109.232	99	2.936	99	103.055	99	4	99	73.133	99	10.777	99	85.969	99	3.872	99	93.6045	99	2.041
100	0	100	64.425	100	2	100	90.93	100	2	100	119.062	100	1.017	100	93.633	100	1.796	100	103.991	100	1.075	100	62.2096	100	2.956	100	75.8543	100	7.019	100	104.266	100	3.187	100	104.504	100	4	100	80.161	100	6.08	100	87.535	100	1.833	100	94.7077	100	1.929
101	0.365	101	64.014	101	1.31	101	86.55	101	1.249	101	125.694	101	1.559	101	96.982	101	1	101	109.435	101	1	101	58.9034	101	2.866	101	74.0782	101	7.909	101	97.5524	101	2.985	101	101.772	101	4	101	88.734	101	4.189	101	87.277	101	1.673	101	93.1147	101	1.325
102	0.939	102	58.529	102	1	102	83.62	102	1	102	119.812	102	3.275	102	96.174	102	1	102	109.541	102	1	102	56.5294	102	2.862	102	76.1295	102	7.549	102	99.5914	102	2.727	102	103.8	102	4.48	102	90.867	102	3.182	102	86.628	102	3.068	102	92.3559	102	1.958
103	1	103	54.221	103	1	103	85.07	103	1	103	116.619	103	4.279	103	88.869	103	1	103	111.742	103	1	103	56.6536	103	2.512	103	78.9387	103	5.727	103	102.613	103	2.041	103	103.056	103	5.527	103	101.126	103	1.978	103	92.148	103	5.629	103	93.0897	103	2.3
104	1.551	104	52.364	104	1	104	85.31	104	1	104	120.753	104	5.62	104	82.584	104	1	104	112.706	104	1	104	57.7616	104	2.792	104	82.9497	104	4.447	104	94.0209	104	2	104	98.204	104	6.884	104	116.682	104	1.146	104	98.182	104	8.246	104	93.1594	104	2.16
105	2.985	105	51.325	105	1	105	86.38	105	1	105	133.584	105	5.024	105	79.978	105	1	105	106.842	105	1	105	57.7605	105	2.985	105	85.9278	105	3.234	105	80.4119	105	2.711	105	97.277	105	6.76	105	122.003	105	0.399	105	97.995	105	9.69	105	94.051	105	2.8
106	6.4	106	51.978	106	1.69	106	84.24	106	1	106	136.085	106	6.957	106	80.202	106	1	106	101.829	106	1.805	106	58.5149	106	3	106	86.3942	106	3	106	75.9412	106	3.913	106	94.817	106	6.382	106	118.389	106	1.197	106	96.284	106	6.896	106	96.0883	106	3.44
107	12.843	107	58.125	107	2.69	107	81.62	107	1	107	132.959	107	7.544	107	81.563	107	1.816	107	100.295	107	2	107	57.5412	107	2.903	107	88.8318	107	3.33	107	73.9629	107	6.322	107	96.888	107	5	107	110.903	107	2.35	107	94.147	107	4.827	107	95.2227	107	4.201
108	17.355	108	71.407	108	3.69	108	84.45	108	1.095	108	129.854	108	7.034	108	78.523	108	2.503	108	100.656	108	2	108	59.876	108	2.423	108	91.1086	108	4.404	108	72.9883	108	8.907	108	96.233	108	4.477	108	105.093	108	3.144	108	93.863	108	3.08	108	85.4118	108	4.721
109	17.818	109	80.336	109	4	109	88.41	109	1	109	124.477	109	4.621	109	76.42	109	3.431	109	102.85	109	2	109	60.2836	109	4.615	109	91.3771	109	5.617	109	72.8937	109	9.433	109	88.311	109	4.401	109	100.092	109	3.647	109	97.879	109	1.926	109	77.2409	109	3.677
110	14.068	110	86.354	110	3.456	110	85.414	110	1.207	110	125.091	110	3.066	110	74.737	110	4.334	110	106.07	110	2	110	60.986	110	11.445	110	94.3838	110	6.332	110	72.5025	110	7.437	110	82.326	110	4.276	110	93.037	110	3.016	110	91.901	110	1.217	110	73.5703	110	3.398
111	9.986	111	92.329	111	3.103	111	81.422	111	1.329	111	122.181	111	3.642	111	74.992	111	4.619	111	105.41	111	2	111	57.9649	111	19.479	111	100.069	111	6.299	111	75.8347	111	5.204	111	82.92	111	3.941	111	92.998	111	2.16	111	86.318	111	1	111	73.0411	111	2.635
112	6.961	112	96.954	112	3	112	79.48	112	1.024	112	115.904	112	3.895	112	75.904	112	4.091	112	102.764	112	2	112	55.8709	112	23.018	112	103.428	112	5.003	112	79.7484	112	3.208	112	91.699	112	3.143	112	99.34	112	1.851	112	81.923	112	1	112	75.9531	112	2
113	4.853	113	99.424	113	2.342	113	77.45	113	1.054	113	116.977	113	4.054	113	77.523	113	3.06	113	103.072	113	2.109	113	53.885	113	19.855	113	107.324	113	3.472	113	80.7258	113	3	113	95.915	113	2	113	96.488	113	1.718	113	82.402	113	1	113	79.3934	113	2.482
114	3.544	114	101.626	114	2	114	78.075	114	1.633	114	112.827	114	2.989	114	81.538	114	2.328	114	101.556	114	2	114	51.3472	114	9.366	114	109.299	114	2.592	114	83.1257	114	3	114	93.621	114	2	114	93.826	114	1.619	114	84.308	114	1.784	114	88.549	114	4.231
115	2.136	115	103.125	115	1.496	115	78.546	115	1.659	115	107.741	115	1.934	115	87.61	115	2.6	115	98.478	115	2	115	47.6321	115	3.662	115	111.326	115	2.184	115	88.1435	115	3	115	91.756	115	2	115	87.589	115	1.519	115	86.976	115	3.093	115	96.4916	115	6.648
116	1.37	116	101.576	116	1.101	116	78.643	116	1.884	116	105.885	116	1.079	116	88.68	116	3.286	116	94.381	116	2	116	43.8388	116	2.097	116	116.394	116	1.516	116	94.9324	116	2.685	116	92.553	116	2.408	116	84.371	116	1.885	116	86.795	116	4.789	116	93.893	116	7.784
117	1	117	100.802	117	1.621	117	81.533	117	2.03	117	104.073	117	1.279	117	93.184	117	3.805	117	88.207	117	2	117	42.6405	117	1.792	117	118.308	117	1.454	117	97.5463	117	2.115	117	90.39	117	2.958	117	82.023	117	2.255	117	86.854	117	7.074	117	92.9532	117	6.789
118	1.077	118	97.306	118	1.868	118	84.706	118	2.175	118	104.253	118	1.576	118	99.437	118	3.609	118	80.547	118	2	118	43.4485	118	2.127	118	116.344	118	2	118	94.5563	118	2.097	118	86.757	118	3.422	118	84.122	118	2.837	118	88.233	118	8.372	118	86.8432	118	4.514
119	1.682	119	93.345	119	1.751	119	84.268	119	2.321	119	109.127	119	1.564	119	99.123	119	3.311	119	72.562	119	2	119	46.1398	119	2.329	119	123.134	119	2	119	94.8578	119	2.824	119	91.248	119	3.251	119	92.235	119	3	119	88.662	119	8.014	119	79.8537	119	3.228
120	2.453	120	91.722	120	1.634	120	82.718	120	2.984	120	111.14	120	2	120	99.468	120	3.015	120	68.486	120	2	120	49.4156	120	2.516	120	120.324	120	2	120	99.7975	120	2.976	120	94.291	120	2.923	120	101.991	120	2.983	120	83.466	120	6.408	120	76.2912	120	2.523
121	3	121	90.177	121	1.808	121	84.292	121	5.784	121	113.715	121	2	121	100.017	121	2.099	121	65.017	121	2	121	53.9142	121	2.118	121	118.748	121	2.082	121	110.391	121	2.397	121	93.375	121	2.746	121	108.364					121	4.524	121	72.7506	121	2
122	3.242	122	89.421	122	2	122	90.966	122	10.715	122	115.971	122	2	122	97.292	122	2.116	122	58.294	122	2.011	122	55.336	122	2	122	119.293	122	2.67	122	111.659	122	2.883	122	92.459	122	3.182	122	115.487					122	3.163	122	69.5357	122	2
123	3.361	123	86.708	123	1.578	123	96.907	123	16.503	123	115.388	123	2.028	123	94.079	123	2	123	53.909	123	2.612	123	56.6622	123	2.123	123	119.65	123	3.393	123	112.095	123	3.412	123	93.11	123	4.153	123	113.841					123	2.679	123	71.8944	123	2
124	3.329	124	83.425	124	1.652	124	97.89	124	17.952	124	110.191	124	2.179	124	93.927	124	2	124	55.783	124	3.824	124	55.0667	124	2.744	124	114.162	124	3.558	124	112.133	124	4.433	124	94.693	124	5.942	124	111.115					124	2.027	124	78.7647	124	3.03
125	4.121	125	81.433	125	2	125	97.272	125	14.666	125	105.509	125	3.044	125	95.811	125	2	125	62.662	125	4.457	125	53.6555	125	2.607	125	112.865	125	3.392	125	107.814	125	6.755	125	91.02	125	6	125	113.222					125	2	125	83.3407	125	4.29
126	4.708	126	74.92	126	2	126	95.887	126	8.593	126	103.059	126	3.923	126	98.44	126	2.157	126	74.258	126	4.537	126	54.4178	126	2.589	126	114.836	126	3.093	126	102.489	126	10.008	126	87.728	126	6.669	126	111.418					126	2	126	87.4979	126	5.802
127	4.559	127	70.008	127	2	127	91.611	127	5.286	127	97.2265	127	3.154	127	99.323	127	3.477	127	89.331	127	3.697	127	58.1245	127	2.113	127	113.508	127	3	127	103.188	127	11.773	127	84.739	127	6.346	127	111.981					127	2.634	127	90.9996	127	5.692
128	4.011	128	66.118	128	2	128	87.828	128	3.674	128	97.0456	128	2.038	128	99.646	128	7.185	128	101.35	128	3	128	61.4019	128	2.751	128	107.684	128	3	128	105.207	128	11.349	128	86.936	128	5.328	128	111.022									128	4.438
129	3.657	129	58.838	129	1.624	129	86.372	129	3.224	129	102.816	129	2	129	101.007	129	13.088	129	98.874	129	3	129	66.4184	129	3.546	129	106.065	129	3	129	106.958	129	10.517	129	88.351	129	5.097	129	108.784									129	3.81
130	2.429	130	52.554	130	1.009	130	84.082	130	3.246	130	108.067	130	1.983	130	106.152	130	16.009	130	95.673	130	2.175	130	63.7176	130	4.357	130	105.381	130	3	130	109.389	130	10.101	130	86	130	5.519	130	109.37									130	3.805
131	2.138	131	52.594	131	1	131	82.932	131	3.024	131	115.176	131	2	131	107.666	131	16.411	131	90.248	131	2	131	56.6766	131	3.911	131	101.447	131	3	131	112.732	131	11.475	131	84.104	131	5.893	131	112.969									131	3.957
132	2	132	56.292	132	1	132	84.129	132	3.33	132	122.79	132	2	132	107.843	132	15.719	132	86.078	132	2	132	53.5204	132	3.291	132	95.5735	132	3.912	132	112.504	132	12.257	132	85.795	132	5.69	132	119.435									132	2.987
133	2	133	60.609	133	1.39	133	90.332	133	2.782	133	131.308	133	2.08	133	109.79	133	12.846	133	83.111	133	2	133	53.8201	133	3	133	94.4971	133	4.415	133	116.832	133	10.062	133	91.022	133	4.807	133	120.538									133	2.309
134	2	134	65.758	134	2.366	134	97.783	134	2.45	134	138.203	134	2	134	112.066	134	7.946	134	80.829	134	2	134	52.781	134	2.967	134	94.829	134	4.713	134	115.527	134	6.889	134	93.658	134	4.399	134	119.222									134	1.524
135	2.027	135	77.944					135	3	135	139	135	2	135	108.843	135	5.276	135	78.581	135	2	135	51.7891	135	3.113	135	90.1364	135	4.17	135	111.93	135	3.876	135	91.918	135	4.795	135	117.266									135	1
136	3.078	136	86.731					136	3	136	141.394	136	2.003	136	101.402	136	3.352	136	77.888	136	2	136	54.4223					136	3.843	136	106.518	136	2.409	136	89.863	136	4.775	136	117.72									136	1.297
137	4.326	137	90.601					137	5.043	137	143.662	137	2.871	137	92.596	137	2.539	137	78.174	137	2	137	57.1949					137	2.797	137	102.378	137	2.086	137	89.862	137	4.113	137	126.3									137	2
138	4.967	138	89.319					138	6.148	138	147.536	138	3.739	138	88.445	138	2.303	138	79.332	138	2	138	58.4265					138	2.817	138	106.201	138	2.275	138	91.363	138	3.387	138	137.495									138	2.026
139	5.711	139	85.647					139	5.586	139	148.423	139	4.607	139	93.442	139	2	139	77.688	139	2	139	58.54					139	3	139	110.109	139	2.53	139	92.04	139	3	139	147.521									139	2
140	6	140	81.22					140	4.067	140	138.671	140	5.679	140	103.338	140	2.062	140	74.987	140	2	140	59.3208									140	2.656	140	92.083	140	2.638	140	151.509									140	2
141	5.512	141	76.475					141	2.456	141	129.364	141	7.184	141	113.198	141	2.118	141	73.879	141	2	141	63.909									141	3.44	141	91.832	141	2.553	141	146.292									141	2.003
142	5.175	142	71.541					142	1.515	142	128.019	142	8.896	142	123.856	142	2.149	142	73.852	142	2	142	66.8975									142	3.848	142	92.995	142	3.152	142	142.481									142	1.669
143	5.998	143	69					143	1	143	124.783	143	9.721	143	130.319	143	2	143	77.845	143	2	143	66.1359									143	3.414	143	92.082	143	4.326	143	142.36									143	1.05
144	6.606	144	69.235					144	1.291	144	124.295	144	11.077	144	128.91	144	2.736	144	81.312	144	2	144	61.4996									144	3.117	144	91.218	144	5.658	144	136.04
145	7.989	145	70.312					145	1.986	145	122.258	145	9.128	145	124.374	145	3.589	145	82.757	145	2	145	58.1915									145	2.374	145	87.621	145	7.626	145	135.251
146	6.766	146	72.698					146	2	146	116.09	146	6.988	146	122.579	146	4.912	146	84.264	146	2	146	55.3664									146	2	146	83.832	146	6.533	146	131.247
147	5.458	147	78.139									147	6.114	147	122.925	147	6.32	147	85.059	147	2	147	56.328									147	1.718	147	82.81	147	5.106	147	122.388
148	5.568	148	84.79									148	6.346	148	119.19	148	5.891	148	84.845	148	2	148	60.8681									148	1.264	148	81.71	148	4.011	148	114.205
149	5.417	149	86.573									149	6.946	149	115.202	149	4.497	149	85.507	149	2	149	60.2154									149	1	149	81.653	149	3.092	149	113.957
150	4.473	150	87.089									150	6.239	150	105.747	150	3.145	150	89.612	150	2	150	61.483									150	1	150	81.372	150	3	150	116.117
151	3.809	151	87.671									151	5.532	151	98.171	151	2.614	151	88.514	151	2	151	66.1921									151	1.596	151	78.671	151	3.526	151	113.284
152	3.085	152	84.05									152	4.681	152	96.959	152	2	152	85.269	152	2	152	69.1157									152	2.57	152	74.15
153	2.764	153	75.834									153	4.014	153	96.494	153	2	153	82.365	153	1.869	153	68.169									153	3.959	153	71.768
154	2	154	67.578									154	4	154	102.27	154	2.348	154	77.617	154	1.469	154	64.7373									154	5.456	154	71.839
155	2.042	155	60.7									155	4.088	155	111.434	155	3	155	75.861	155	2	155	64.4716									155	5.611	155	69.46
156	2.945	156	62.265									156	5.007	156	121.01	156	3.148	156	78.551	156	2	156	68.0159									156	4.985	156	65.331
157	3.847	157	65.117									157	5.916	157	126.16	157	5.33	157	84.552	157	2	157	72.3195									157	4.185	157	62.869
158	4.411	158	68.703									158	6.592	158	133.932	158	8.594	158	92.986	158	2.466	158	81.7211									158	3.266	158	65.848
159	4.847	159	68.653									159	7.751	159	139.548	159	10.889	159	100.716	159	3.005	159	88.0461									159	3.025	159	73.628
160	5.314	160	66.681									160	6.336	160	138.748	160	12.9	160	104.098	160	3.281	160	89.588									160	3.264	160	84.91
161	5.468	161	64.716									161	4.674	161	139.248	161	13.573	161	103.243	161	2.738	161	89.2986									161	3.603	161	94.435
162	4.573	162	61.558									162	3.754	162	138.319	162	12.531	162	95.908	162	2.195	162	86.2739									162	3.855	162	100.576
163	3.505	163	58.733									163	3.047	163	139.73	163	9.804	163	87.094	163	2	163	81.5467									163	4.804	163	100.673
164	2.727	164	60.058									164	3	164	128	164	5.563	164	83.377	164	2	164	79.7204									164	6.154	164	95.593
165	2.898	165	61.749									165	3	165	117.895	165	3.263	165	84.14	165	2	165	76.655									165	7.272	165	93.624
166	3	166	65.405									166	3.702	166	114.631	166	3.508	166	87.158	166	2	166	74.1814									166	7.9	166	93.731
167	3	167	70.762									167	4.343	167	117.799	167	5.084	167	90.798	167	2	167	73.6359									167	6.924	167	92.924
168	3.246	168	76.302									168	5.487	168	122.595	168	6.865	168	92.147	168	2	168	74.2038									168	5.207	168	92.044
169	2.756	169	78.988									169	6	169	127.299	169	7.356	169	93.483	169	2	169	74.0829									169	4.353	169	93.153
170	2	170	77.844									170	5.621	170	129.67	170	6.601	170	94.443	170	2	170	74.361									170	3.752	170	90.022
171	2.02	171	80.657													171	5.08	171	97.403	171	2	171	74.9978									171	2.947	171	84.524
172	2.115	172	76.931													172	4.188	172	100.241	172	2	172	73.9223									172	2.413	172	83.748
173	2.032	173	76.352													173	3.519	173	104.28	173	2	173	70.5645									173	2	173	81.667
174	2	174	73.611													174	2.666	174	109.009	174	2	174	66.4907									174	2.007	174	74.096
175	2.104	175	68.752													175	2	175	111.826	175	2	175	62.6671									175	2	175	65.188
176	2	176	66.027													176	2.017	176	116.632	176	2	176	60.7678									176	2	176	62.406
177	2	177	64.658													177	2	177	123.832	177	2	177	63.8874									177	2	177	60.63
178	2	178	59.702													178	2.747	178	134.206	178	2	178	67.3896
179	2	179	61.001													179	2.942	179	138.473	179	2.029	179	67.5196
180	2	180	67.178													180	3.454	180	128.8
181	2	181	78.807
182	2.026	182	92.449
183	2.093	183	98.801
184	2.939	184	106.22
[truncated: 74 more columns]

## Sheet: Binned
	1	FISH	PI	2	FISH	PI	3	FISH	PI	4	FISH	PI	5	FISH	PI	6	FISH	PI	7	FISH	PI	8	FISH	PI	9	FISH	PI	10	FISH	PI	11	FISH	PI	13	FISH	PI	14	FISH	PI	15	FISH	PI	16	FISH	PI	17	FISH	PI	18
X	X	Y	Y	X	Y	Y	X	Y	Y	X	Y	Y	X	Y	Y	X	Y	Y	X	Y	Y	X	Y	Y	X	Y	Y	X	Y	Y	X	Y	Y	X	Y	Y	X	Y	Y	X	Y	Y	X	Y	Y	X	Y	Y	X
0	0	2	156	0	7	211	0	3	179	0	11	193	0	1	176	0	2	136	0	1	157	0	2	144	0	3	164	0	4	171	0	2	154	0	12	138	0	1	219	0	2	168	0	2	160	0	17	183	0
1	0.543478	2.978	149.068	0.746269	5.443	214.204	0.684932	2.973	184.438	0.588235	11	198.186	0.555556	1	193.604	0.558659	2	136	0.740741	1	159.9	0.719424	2	149.656	0.564972	2.244	173.181	0.662252	3.086	160.616	0.833333	2	164.862	0.787402	18.684	136.658	0.699301	1.293	244.985	0.502513	2.494	179.204	0.657895	2	167.397	0.675676	17.399	178.027	0.555556
2	1.08696	2.956	149.911	1.49254	3.885	203.853	1.36986	3.22	187.175	1.17647	9.587	199.834	1.11111	1	199.445	1.11732	2	135.405	1.48148	1	160.19	1.43885	2	145.001	1.12994	2.31	174.235	1.3245	3.994	143.119	1.66667	2	175.843	1.5748	22.528	135.216	1.3986	1	251.88	1.00503	3.298	180.122	1.31579	2.31	170.527	1.35135	13.245	167.508	1.11111
3	1.63043	3.866	149.467	2.23881	2.335	181.376	2.05479	2.886	188.644	1.76471	7.022	192.468	1.66667	1.865	191.118	1.67598	2	130.305	2.22222	1	156.057	2.15827	2.623	138.313	1.69492	2.707	170.531	1.98675	5.733	137.552	2.5	1.181	168.738	2.3622	20.536	134.916	2.0979	1.043	242.97	1.50754	4.229	180.909	1.97368	2.965	171.746	2.02703	7.388	157.253	1.66667
4	2.17391	3.911	135.569	2.98507	2.072	151.106	2.73973	3.228	169.356	2.35294	5.297	180.997	2.22222	4.176	181.949	2.23464	2.177	119.599	2.96296	1.007	149.734	2.8777	2.99	129.893	2.25989	3.239	161.663	2.64901	6.654	136.014	3.33333	1	155.962	3.14961	14.374	130.791	2.7972	0.501	225.534	2.01005	6.417	175.485	2.63158	4.239	176.423	2.7027	5.438	140.534	2.22222
5	2.71739	3.778	124.125	3.73134	2	121.239	3.42466	3.785	152.742	2.94118	5.049	170.703	2.77778	7.44	172.632	2.7933	4.048	113.042	3.7037	1.085	141.859	3.59712	3.996	123.502	2.82486	4.763	161.764	3.31126	7.976	137.799	4.16667	1.682	149.588	3.93701	8.311	120.355	3.4965	0	203.128	2.51256	12.362	165.288	3.28947	5.824	178.452	3.37838	4.032	118.061	2.77778
6	3.26087	2.868	111.685	4.47761	2.012	100.273	4.10959	5.142	141.078	3.52941	4.638	160.602	3.33333	12.512	158.567	3.35196	6.972	104.957	4.44444	1	129.751	4.31655	5.196	121.247	3.38983	7.819	153.209	3.97351	9.467	137.993	5	2.897	147.532	4.72441	5.269	106.632	4.1958	0.685	173.564	3.01508	17.997	153.688	3.94737	7.292	172.248	4.05405	3.615	98.375	3.33333
7	3.80435	2.844	94.43	5.22388	2.607	84.192	4.79452	7.398	137.6	4.11765	4.04	143.29	3.88889	16.951	152.059	3.91061	9.467	95.4858	5.18519	1.732	122.595	5.03597	6.516	122.82	3.9548	12.382	132.008	4.63576	13.076	145.156	5.83333	6.037	146.169	5.51181	2.913	89.2241	4.8951	1.093	145.836	3.51759	21.936	144.048	4.60526	8.294	160.542	4.72973	4.369	81.301	3.88889
8	4.34783	3.82	83.444	5.97015	2.803	74.454	5.47945	8.498	137.087	4.70588	3.27	122.215	4.44444	22.132	151.615	4.46927	10.71	85.4869	5.92593	2.315	123.007	5.7554	7.397	116.998	4.51977	16.148	108.18	5.29801	15.919	148.914	6.66667	9.805	140.442	6.29921	1.821	75.8643	5.59441	1.25	128.056	4.0201	22.115	139.557	5.26316	8.524	146.988	5.40541	4.024	67.939	4.44444
9	4.8913	4.798	80.407	6.71642	2.986	68.607	6.16438	8.193	130.915	5.29412	2.526	105.315	5	26.923	141.818	5.02793	10.342	76.5477	6.66667	3.721	124.393	6.47482	8.859	109.315	5.08475	15.292	87.224	5.96026	14.549	132.052	7.5	13.4	131.056	7.08661	1.709	67.1159	6.29371	0.794	117.474	4.52261	15.379	126.377	5.92105	10.59	129.657	6.08108	3.045	54.989	5
10	5.43478	5.775	81.664	7.46269	3.742	65.62	6.84932	6.94	122.541	5.88235	2.195	94.088	5.55556	25.348	126.855	5.58659	7.905	70.1388	7.40741	4.982	114.975	7.19424	10.923	106.633	5.64972	13.407	74.623	6.62252	10.963	117.01	8.33333	15.352	122.216	7.87402	1.839	65.3214	6.99301	0.609	110.768	5.02513	9.86	112.431	6.57895	11	114.491	6.75676	3	46.417	5.55556
11	5.97826	5.756	85.988	8.20896	4.774	70.279	7.53425	5.897	112.13	6.47059	2	83.773	6.11111	19.589	109.251	6.14525	5.876	66.3793	8.14815	5.018	104.744	7.91367	11.347	104.131	6.21469	12.515	70.968	7.28477	6.27	105.178	9.16667	14.173	106.178	8.66142	3.427	70.6126	7.69231	0.128	108.004	5.52764	6.4	102.85	7.23684	9.794	102.898	7.43243	2.995	44.199	6.11111
12	6.52174	4.005	91.051	8.95522	5.012	77.997	8.21918	4.945	104.118	7.05882	2.54	74.42	6.66667	11.08	91.112	6.70391	4.946	65.7156	8.88889	4.061	90.5475	8.63309	9.736	95.3224	6.77966	12.249	71.589	7.94702	3.128	94.436	10	10.618	90.852	9.44882	6.256	77.1846	8.39161	0	103.969	6.03015	5.76	99.945	7.89474	6.067	91.157	8.10811	3.94	48.714	6.66667
13	7.06522	3.003	95.142	9.70149	4.705	86.916	8.90411	3.262	101.746	7.64706	2.65	67.106	7.22222	5.16	79.367	7.26257	3.618	68.9694	9.62963	3.464	79.3348	9.35252	7.101	86.3302	7.34463	13.134	75.701	8.60927	2.422	81.542	10.8333	7.925	83.588	10.2362	10.544	78.9755	9.09091	0	97.061	6.53266	6	97.392	8.55263	2.924	77.514	8.78378	4	53.291	7.22222
14	7.6087	2.003	94.934	10.4478	4.509	97.721	9.58904	2.001	110.185	8.23529	2.713	63.455	7.77778	4.894	75.311	7.82123	2.911	71.3339	10.3704	4.367	74.0936	10.0719	3.874	79.7983	7.9096	13.509	82.278	9.27152	2.135	74.345	11.6667	4.874	80.345	11.0236	17.309	81.5738	9.79021	0	87.2	7.03518	7.303	91.858	9.21053	1.518	68.549	9.45946	4.931	59.934	7.77778
15	8.15217	1.336	94.667	11.194	5	105.724	10.274	2	111.768	8.82353	3.494	64.245	8.33333	6.448	74.219	8.37989	2.306	71.632	11.1111	7.726	76.82	10.7914	2.011	74.9881	8.47458	17.906	87.359	9.93377	1.978	71.509	12.5	4.012	81.712	11.811	17.189	80.9115	10.4895	0	78.268	7.53769	7.89	87.725	9.86842	1.824	67.041	10.1351	4.53	63.753	8.33333
16	8.69565	1.355	94.201	11.9403	4.671	112.976	10.9589	2.806	111.893	9.41176	4	67.92	8.88889	7.822	72.514	8.93855	2.239	71.1222	11.8519	13.957	80.1491	11.5108	0.812	72.7385	9.03955	25.991	88.608	10.596	2	69.935	13.3333	4.582	86.281	12.5984	13.377	79.6894	11.1888	0	72.779	8.0402	7.337	82.401	10.5263	3.001	73.731	10.8108	6.058	59.588	8.88889
17	9.23913	1.997	92.895	12.6866	4.633	122.164	11.6438	4.411	117.289	10	4	69.52	9.44444	7.602	74.434	9.49721	3.348	70.3724	12.5926	22.499	84.3571	12.2302	0.077	73.9239	9.60452	36.938	89.487	11.2583	2	67.321	14.1667	5	89.026	13.3858	8.777	79.0685	11.8881	0	71.259	8.54271	6.032	78.965	11.1842	5.609	82.611	11.4865	10.396	53.714	9.44444
18	9.78261	2	93.796	13.4328	4.999	133.184	12.3288	5.37	118.949	10.5882	4	70.44	10	6.754	77.668	10.0559	4.727	71.1249	13.3333	28.793	89.8057	12.9496	0	76.3592	10.1695	40.444	86.615	11.9205	3.115	69.725	15	4.391	89.485	14.1732	7.191	77.3693	12.5874	0	76.15	9.04523	4.402	75.729	11.8421	8.782	88.089	12.1622	12.795	49.003	10
19	10.3261	2.42	101.077	14.1791	6.763	142.492	13.0137	4.169	120.456	11.1765	4	74.4	10.5556	6.395	77.692	10.6145	5.904	69.3291	14.0741	26.082	91.8568	13.6691	0	78.9232	10.7345	36.509	84.427	12.5828	4.801	77.112	15.8333	2.679	89.131	14.9606	10.904	76.6693	13.2867	0	85.324	9.54774	3.695	70.981	12.5	9.025	87.189	12.8378	10.028	49.333	10.5556
20	10.8696	3.439	108.409	14.9254	7.633	156.589	13.6986	3.042	116.438	11.7647	4	77	11.1111	6.754	79.412	11.1732	4.856	68.0124	14.8148	19.196	97.1672	14.3885	0	80.7171	11.2994	29.793	82.814	13.245	6.228	81.674	16.6667	0.539	87.56	15.748	17.878	79.9161	13.986	0	91.686	10.0503	3.983	70.918	13.1579	6.656	79.596	13.5135	6.376	50.859	11.1111
21	11.413	2.472	107.671	15.6716	10.246	173.613	14.3836	2.401	116.392	12.3529	3.52	78.44	11.6667	5.746	85.641	11.7318	3.598	67.6037	15.5556	12.88	101.125	15.1079	0	83.2386	11.8644	23.855	83.255	13.9073	7.197	87.781	17.5	0.0008028	88.121	16.5354	23.969	84.9415	14.6853	0	93.084	10.5528	4.014	70.1	13.8158	3.99	72.367	14.1892	3.195	50.64	11.6667
22	11.9565	2.489	97.588	16.4179	11.82	177.82	15.0685	2.326	123.871	12.9412	2.52	78.08	12.2222	4.082	90.848	12.2905	2.06	72.0713	16.2963	9.466	98.5038	15.8273	0	85.5521	12.4294	16.07	81.403	14.5695	7.782	96.186	18.3333	0	88.879	17.3228	25.739	88.9483	15.3846	0	92.604	11.0553	3.796	70.789	14.4737	1.877	68.542	14.8649	2.003	47.691	12.2222
23	12.5	4.013	85.071	17.1642	14.46	178	15.7534	2.92	132.878	13.5294	2	74.56	12.7778	3.236	91.709	12.8492	1.094	76.7173	17.037	9.207	99.6637	16.5468	0	88.0275	12.9944	10.387	79.243	15.2318	8.202	105.057	19.1667	0	91.321	18.1102	21.567	92.5145	16.0839	0	93.25	11.5578	3.074	74.068	15.1316	0.658	69.962	15.5405	1.723	47.474	12.7778
24	13.0435	8.573	73.071	17.9104	15.82	175.54	16.4384	2.981	139.783	14.1176	1.52	73	13.3333	3.246	90.702	13.4078	1.588	81.5609	17.7778	11.703	110.805	17.2662	0	90.9598	13.5593	9.296	83.258	15.894	7.775	109.561	20	0.465	91.652	18.8976	15.303	95.0556	16.7832	0	88.814	12.0603	3	76.072	15.7895	0	73.866	16.2162	1.296	45.627	13.3333
25	13.587	14.187	63.062	18.6567	16.82	167.62	17.1233	3.123	137.551	14.7059	1	72.04	13.8889	4.91	90.277	13.9665	2.191	84.5491	18.5185	13.678	105.602	17.9856	0	92.6596	14.1243	11.093	91.45	16.5563	7.706	108.604	20.8333	0.778	88.903	19.685	13.945	94.3529	17.4825	0	85.485	12.5628	2.776	73.796	16.4474	0	78.247	16.8919	0.894	44.749	13.8889
26	14.1304	17.137	54.632	19.403	14.54	160.26	17.8082	2.763	126.778	15.2941	1	69.08	14.4444	4.809	90.727	14.5251	2.781	82.7688	19.2593	11.6	99.1143	18.705	0	90.2007	14.6893	14.502	93.688	17.2185	6.593	108.03	21.6667	0.914	86.084	20.4724	21.239	93.8901	18.1818	0	86.172	13.0653	2.127	69.457	17.1053	0	81.522	17.5676	0	46.304	14.4444
27	14.6739	17.995	47.646	20.1493	13.18	160.64	18.4932	1.973	116.186	15.8824	1	66.04	15	4.716	92.573	15.0838	3	82.76	20	6.213	93.044	19.4245	0	85.3873	15.2542	17.83	94.889	17.8808	4.422	112.012	22.5	1.176	83.847	21.2598	40.026	91.9801	18.8811	0	86.69	13.5678	2	65.291	17.7632	0.032	81.415	18.2432	0	49.5	15
28	15.2174	12.041	43.274	20.8955	13	157.72	19.1781	1.238	108.832	16.4706	1.96	62.12	15.5556	4.467	95.919	15.6425	2.24	79.2	20.7407	1.115	88.9064	20.1439	0	83.6754	15.8192	16.199	88.989	18.543	2.046	120.202	23.3333	1.742	84.629	22.0472	63.98	91.8736	19.5804	0.328	88.607	14.0704	2	62.705	18.4211	0	80.113	18.9189	0	50.09	15.5556
29	15.7609	6.043	43.575	21.6418	12.18	152.08	19.863	2.452	111.328	17.0588	3.96	59	16.1111	3.548	96.472	16.2011	2	78	21.4815	0	87.8748	20.8633	0	80.7161	16.3842	15.236	85.479	19.2053	0.085	125.616	24.1667	2	85.414	22.8346	86.341	98.6576	20.2797	3.353	94.085	14.5729	2	60.575	19.0789	0	81.226	19.5946	0	49.08	16.1111
30	16.3043	3.022	48.298	22.3881	9.54	149.36	20.5479	4.404	114.015	17.6471	5	62.36	16.6667	2.629	93.417	16.7598	2	75.72	22.2222	0	91.3824	21.5827	0	78.0239	16.9492	13.911	86.148	19.8675	0	134.312	25	1.677	85.005	23.622	106.946	108.558	20.979	14.271	98.295	15.0754	2.082	62.517	19.7368	0	83.92	20.2703	0	48.241	16.6667
31	16.8478	1.015	55.876	23.1343	5.72	146.54	21.2329	6.153	120.598	18.2353	3.56	70.32	17.2222	1.829	88.419	17.3184	2	71.2	22.963	0	99.7689	22.3022	0	78.2654	17.5141	12.102	86.15	20.5298	0	139.554	25.8333	0.622	85.001	24.4094	111.464	116.77	21.6783	36.038	104.485	15.5779	2.049	63.47	20.3947	0	93.256	20.9459	0	48.822	17.2222
32	17.3913	0.008	63.54	23.8806	1.72	150.1	21.9178	5.734	133.213	18.8235	1.04	78.84	17.7778	1.845	85.54	17.8771	2	68.48	23.7037	0	108.659	23.0216	0	78.7006	18.0791	10.638	86.677	21.1921	0	139.267	26.6667	0	86.41	25.1969	93.308	119.686	22.3776	64.554	111.166	16.0804	1.653	67.181	21.0526	0	102.576	21.6216	0	51.6	17.7778
33	17.9348	0	70.345	24.6269	0.18	153.46	22.6027	4.289	138.9	19.4118	0	85.88	18.3333	2.129	83.372	18.4358	1.24	71.04	24.4444	0	115.671	23.741	0	75.4114	18.6441	11.695	80.807	21.8543	0	138.912	27.5	0	89.252	25.9843	63.218	125.621	23.0769	91.522	115.023	16.5829	0.955	70.77	21.7105	0	107.082	22.2973	0	58.651	18.3333
34	18.4783	0.749	73.926	25.3731	0	154	23.2877	3.07	138.561	20	0	89.48	18.8889	3	81.264	18.9944	0.24	76.56	25.1852	0	119.862	24.4604	0	72.5084	19.209	10.932	79.063	22.5166	0.235	135.916	28.3333	0	92.434	26.7717	33.084	128.871	23.7762	119.723	117.176	17.0854	0.132	78.166	22.3684	0	104.875	22.973	0	65.283	18.8889
35	19.0217	1.769	76.533	26.1194	0.82	149.08	23.9726	1.714	140.982	20.5882	0	87.6	19.4444	3	78.113	19.5531	0	78.76	25.9259	0	123.088	25.1799	0	72.9534	19.774	7.702	80.023	23.1788	0.837	128.61	29.1667	0	94.673	27.5591	14.924	130.763	24.4755	157.196	112.296	17.5879	0	87.564	23.0263	0	100.465	23.6486	0	70.97	19.4444
36	19.5652	5.367	76.797	26.8657	3.46	137.34	24.6575	0.243	140.243	21.1765	0	83.259	20	3.38	78.883	20.1117	0	79.76	26.6667	0	129.233	25.8993	0	74.3577	20.339	3.292	80.9	23.8411	3.313	126.483	30	0	96.183	28.3465	7.307	136.654	25.1748	193.073	109.82	18.0905	0	94.873	23.6842	0	92.93	24.3243	0	76.922	20
37	20.1087	7.448	75.721	27.6119	12.2	124.34	25.3425	0	145.31	21.7647	0	82.246	20.5556	2.968	85.155	20.6704	0	80.76	27.4074	1.892	131.405	26.6187	0	74.652	20.904	1.348	79.599	24.5033	5.559	127.901	30.8333	0	97.429	29.1339	4.377	140.514	25.8741	213.149	107.412	18.593	0	100.983	24.3421	0	88.848	25	0	78.138	20.5556
38	20.6522	8.369	76.768	28.3582	29.58	119.54	26.0274	0	151.055	22.3529	0	83.538	21.1111	3.168	94.484	21.2291	0	77.2	28.1481	4.918	128.286	27.3381	0	82.7151	21.4689	0.992	80.318	25.1656	7.26	134.816	31.6667	0	99.102	29.9213	3.159	140.841	26.5734	204.435	99.508	19.0955	0	101.485	25	0	86.701	25.6757	2.126	76.201	21.1111
39	21.1957	6.75	83.865	29.1045	51.86	113.26	26.7123	0	149.359	22.9412	0	84.099	21.6667	3.923	100.903	21.7877	0	72.2	28.8889	9.856	121.982	28.0576	0	90.6311	22.0339	0.408	84.287	25.8278	9.55	130.371	32.5	0	100.279	30.7087	4.635	138.573	27.2727	185.049	94.966	19.598	0	102.003	25.6579	0	86.219	26.3514	8.666	75.794	21.6667
40	21.7391	4.797	89.61	29.8507	73.22	102.16	27.3973	0	151.169	23.5294	0	85.814	22.2222	4.936	108.344	22.3464	0	71	29.6296	17.038	113.562	28.777	0	97.3013	22.5989	0	83.328	26.4901	14.873	120.437	33.3333	0.452	98.965	31.4961	9.886	131.755	27.972	158.545	89.376	20.1005	0	104.538	26.3158	0	86.038	27.027	23.138	78.045	22.2222
41	22.2826	3.018	92.24	30.597	94.22	91.8	28.0822	0	146.632	24.1176	0	80.894	22.7778	5.168	114.675	22.905	0	73.28	30.3704	26.941	108.275	29.4964	0.122	108.701	23.1638	0	81.31	27.1523	33.316	114.148	34.1667	2.836	92.183	32.2835	27.714	124.975	28.6713	137.577	82.57	20.603	0	107.269	26.9737	0	87.913	27.7027	41.508	82.527	22.7778
42	22.8261	3	85.538	31.3433	113.58	82.62	28.7671	0	134.41	24.7059	0	76.798	23.3333	5.342	115.235	23.4637	0	76.28	31.1111	39.904	104.785	30.2158	2.101	113.09	23.7288	0	78.316	27.8146	71.11	114.737	35	7.942	85.244	33.0709	50.571	115.257	29.3706	135.202	80.216	21.1055	0	112.587	27.6316	0	85.394	28.3784	64.034	80.928	23.3333
43	23.3696	4.078	76.497	32.0896	132.58	76.9	29.4521	0	119.721	25.2941	0.257	75.033	23.8889	3.809	110.862	24.0223	0	79.28	31.8519	60.437	107.61	30.9353	7.601	110.153	24.2938	0	76.27	28.4768	120.937	108.852	35.8333	18.95	81.529	33.8583	80.485	106.064	30.0699	139.208	79.533	21.608	0	121.804	28.2895	0.093	84.573	29.0541	83.695	81.289	23.8889
44	23.913	7.012	77.125	32.8358	149.12	70.26	30.137	0	110.89	25.8824	1.417	80.342	24.4444	1.117	105.666	24.581	0	81.52	32.5926	93.297	108.408	31.6547	16.263	101.391	24.8588	0.061	78.192	29.1391	147.101	101.982	36.6667	34.5	78.718	34.6457	108.157	99.8134	30.7692	137.203	80.397	22.1106	0	130.475	28.9474	1.124	85.098	29.7297	108.164	82.552	24.4444
45	24.4565	7.99	79.968	33.5821	167.58	63.26	30.8219	0	110.838	26.4706	4.405	81.345	25	0	98.944	25.1397	0	79.72	33.3333	137.94	98.2677	32.3741	36.023	95.2447	25.4237	0.041	83.503	29.8013	150.124	95.294	37.5	50.36	78.068	35.4331	138.039	97.0017	31.4685	126.828	82.683	22.6131	0	132.478	29.6053	4.171	87.01	30.4054	138.669	82.938	25
46	25	4.312	86.504	34.3284	165.26	58.72	31.5068	0	116.569	27.0588	11.045	76.798	25.5556	0	99.64	25.6983	3.8	81.28	34.0741	182.845	89.9593	33.0935	74.156	86.2709	25.9887	0	93.009	30.4636	145.068	85.839	38.3333	69.516	71.525	36.2205	159.06	98.074	32.1678	118.281	89.171	23.1156	0	127.543	30.2632	12.581	85.995	31.0811	152.275	81.989	25.5556
47	25.5435	1.381	90.197	35.0746	150.88	58	32.1918	2.3	121.834	27.6471	24.114	74.983	26.1111	0	105.125	26.257	14.88	82.76	34.8148	210.904	85.9333	33.8129	126.243	75.3691	26.5537	0	105.412	31.1258	141.244	71.73	39.1667	92.936	67.32	37.0079	174.593	96.4569	32.8671	106.541	92.883	23.6181	0	119.927	30.9211	24.778	84.545	31.7568	166.785	75.144	26.1111
48	26.087	0.843	87.998	35.8209	139.8	60.46	32.8767	11.141	128.646	28.2353	46.268	76.266	26.6667	0	104.462	26.8156	39.28	78.44	35.5556	209.722	84.3547	34.5324	169.053	67.2468	27.1186	0	111.413	31.7881	128.243	63.888	40	128.366	64.718	37.7953	173.272	94.7541	33.5664	95.81	96.263	24.1206	0.293	111.095	31.5789	38.437	84.26	32.4324	159.604	68.414	26.6667
49	26.6304	1.966	81.08	36.5672	136.36	64.28	33.5616	30.624	130.768	28.8235	76.481	77.209	27.2222	0	104.667	27.3743	75.64	74.72	36.2963	210.196	78.9695	35.2518	191.195	60.6824	27.6836	0.324	115.402	32.4503	114.285	58.791	40.8333	171.705	63.244	38.5827	175.705	93.7408	34.2657	78.288	103.715	24.6231	2.33	101.752	32.2368	55.792	80.916	33.1081	144.674	60.241	27.2222
50	27.1739	6.478	72.82	37.3134	138.46	69.92	34.2466	55.039	131.024	29.4118	114.55	79.445	27.7778	0	99.293	27.933	110.08	69.44	37.037	204.755	78.8606	35.9712	198.377	53.8518	28.2486	2.761	113.514	33.1126	125.431	54.663	41.6667	201.183	66.672	39.3701	183.177	89.2824	34.965	58.535	115.809	25.1256	11.685	98.109	32.8947	78.541	77.335	33.7838	134.462	53.843	27.7778
51	27.7174	16.124	62.517	38.0597	133.26	73.46	34.9315	78.802	134.526	30	167.028	82.665	28.3333	0	94.233	28.4916	135.48	64.2	37.7778	189.598	84.8645	36.6906	204.714	52.0873	28.8136	11.194	110.288	33.7748	166.478	48.824	42.5	209.332	70.609	40.1575	198.175	80.594	35.6643	44.935	122.754	25.6281	28.976	98.576	33.5526	105.832	72.334	34.4595	141.313	48.411	28.3333
52	28.2609	29.086	54.561	38.806	118.88	74	35.6164	96.017	134.872	30.5882	214.385	86.746	28.8889	0	89.224	29.0503	156.96	60.72	38.5185	164.972	90.3471	37.4101	194.704	52.7195	29.3785	24.763	104.991	34.4371	207.27	45.272	43.3333	192.053	70.114	40.9449	208.186	70.7384	36.3636	44.643	124.432	26.1307	51.591	98.782	34.2105	130.448	66.356	35.1351	152.858	47.165	28.8889
53	28.8043	41.2	51.918	39.5522	116.82	76.46	36.3014	105.127	135.437	31.1765	240.338	90.87	29.4444	1.094	81.938	29.6089	174.16	57.72	39.2593	148.527	92.3462	38.1295	175.501	54.8885	29.9435	36.713	97.179	35.0993	215.242	47.627	44.1667	171.335	74.944	41.7323	211.566	63.636	37.0629	45.581	129.584	26.6332	74.663	96.257	34.8684	145.473	63.171	35.8108	165.85	50.628	29.4444
54	29.3478	50.464	49.312	40.2985	122.74	81.1	36.9863	108.012	135.234	31.7647	230.325	93.019	30	7.85	75.625	30.1676	181.04	56.24	40	129.415	90.8804	38.8489	151.908	61.1326	30.5085	46.544	88.361	35.7616	202.448	50.316	45	156.788	73.596	42.5197	192.756	59.4234	37.7622	40.891	137.837	27.1357	100.774	92.966	35.5263	147.228	61.59	36.4865	178.861	59.796	30
55	29.8913	60.172	47.242	41.0448	128.1	84.46	37.6712	118.053	125.611	32.3529	192.259	98.53	30.5556	22.825	72.581	30.7263	178.96	57.52	40.7407	106.426	91.5701	39.5683	135.71	65.3673	31.0734	50.476	85.447	36.4238	179.846	52.045	45.8333	158.074	75.545	43.3071	161.174	54.6545	38.4615	28.369	139.784	27.6382	121.063	92.75	36.1842	138.876	58.416	37.1622	174.697	71.121	30.5556
56	30.4348	85.257	46.376	41.791	122.44	89.92	38.3562	130.794	114.243	32.9412	159.731	106.288	31.1111	47.059	69.981	31.2849	172.68	62.56	41.4815	103.179	92.2524	40.2878	143.363	65.5304	31.6384	50.994	87.463	37.0861	150.405	52.629	46.6667	176.919	78.435	44.0945	122.878	52.4357	39.1608	16.82	134.478	28.1407	128.34	95.891	36.8421	139.085	56.98	37.8378	162.084	82.164	31.1111
57	30.9783	129.176	44.097	42.5373	131.66	95.1	39.0411	154.315	103.025	33.5294	150.404	107.44	31.6667	68.671	68.458	31.8436	157.32	65.52	42.2222	119.549	95.9098	41.0072	166.065	65.6201	32.2034	55.15	79.411	37.7483	125.099	55.939	47.5	190.374	81.115	44.8819	95.581	54.5578	39.8601	8.85	125.278	28.6432	128.009	99.764	37.5	156.849	57.129	38.5135	161.606	86.085	31.6667
58	31.5217	176.679	42.686	43.2836	142.2	98.46	39.726	178.379	95.8427	34.1176	150.417	102.622	32.2222	79.377	67.135	32.4022	143.88	68.28	42.963	147.534	98.3868	41.7266	195.575	69.2836	32.7684	67.683	74.695	38.4106	95.069	65.4	48.3333	188.742	86.372	45.6693	84.318	59.2115	40.5594	3.843	118.783	29.1457	127.307	101.405	38.1579	188.163	58.927	39.1892	167.043	81.448	32.2222
59	32.0652	208.528	43.073	44.0299	130.06	102.28	40.411	195.512	98.8308	34.7059	140.556	98.347	32.7778	88.71	66.471	32.9609	134.92	65.96	43.7037	176.961	98.8176	42.446	195.979	68.8713	33.3333	93.132	69.176	39.0728	72.725	76.766	49.1667	167.855	89.409	46.4567	84.209	62.412	41.2587	1.884	115.322	29.6482	125.217	103.521	38.8158	193.717	61.103	39.8649	161.266	73.356	32.7778
60	32.6087	208.197	45.059	44.7761	99.94	102.18	41.0959	186.17	99.5377	35.2941	134.288	94.734	33.3333	103.165	67.54	33.5196	135.28	61.96	44.4444	179.053	94.4023	43.1655	175.828	68.804	33.8983	120.241	62.875	39.7351	61.879	81.044	50	147.984	89.982	47.2441	88.668	65.0639	41.958	2.815	116.541	30.1508	120.477	103.996	39.4737	168.663	70.872	40.5405	125.805	69.679	33.3333
61	33.1522	179.466	49.139	45.5224	60.38	104.46	41.7808	170.957	102.162	35.8824	131.295	92.632	33.8889	117.242	64.777	34.0782	140.56	57.2	45.1852	148.482	84.9185	43.8849	147.033	71.6722	34.4633	147.648	58.147	40.3974	54.708	74.794	50.8333	142.707	90.038	48.0315	92.421	66.5199	42.6573	5.084	119.69	30.6533	125.524	97.623	40.1316	125.137	85.325	41.2162	82.433	69.797	33.8889
62	33.6957	170.8	52.405	46.2687	25.12	108.28	42.4658	161.807	108.761	36.4706	130.046	92.584	34.4444	132.118	58.711	34.6369	140.48	56.76	45.9259	104.588	79.5348	44.6043	113.987	74.9177	35.0282	183.047	56.75	41.0596	41.787	74.092	51.6667	150.629	90.341	48.8189	77.841	66.6471	43.3566	6.636	121.05	31.1558	148.037	86.716	40.7895	85	95	41.8919	46.43	73.514	34.4444
63	34.2391	187.23	54.6	47.0149	5.955	104.502	43.1507	165.761	124.571	37.0588	128.885	93.919	35	133.446	53.656	35.1955	130.12	58.52	46.6667	69.728	80.5101	45.3237	79.187	76.7948	35.5932	218.472	60.156	41.7219	22.575	76.024	52.5	161.118	93.445	49.6063	61.949	66.3876	44.0559	6.56	118.68	31.6583	169.076	81.51	41.4474	52.968	101.68	42.5676	23.297	77.694	35
64	34.7826	205.377	54.233	47.7612	0.588	98.631	43.8356	175.403	139.014	37.6471	115.628	93.682	35.5556	126.022	51.7	35.7542	116.36	61.28	47.4074	39.688	88.2101	46.0432	49.386	80.3492	36.1582	246.985	64.469	42.3841	7.527	73.31	53.3333	147.32	97.662	50.3937	41.789	72.1667	44.7552	5.12	113.92	32.1608	178.273	80.724	42.1053	22.793	103.613	43.2432	10.862	84.941	35.5556
65	35.3261	221.648	56.608	48.5075	0	93.192	44.5205	189.215	133.189	38.2353	96.116	90.15	36.1111	126.938	53.46	36.3128	97.457	65.7053	48.1481	16.876	94.3944	46.7626	29.218	79.0382	36.7232	252.92	69.892	43.0464	1.112	70.801	54.1667	108.098	99.415	51.1811	23.219	80.4663	45.4545	3.12	106.48	32.6633	173.819	82.886	42.7632	5.913	102.228	43.9189	3.699	85.52	36.1111
66	35.8696	233.263	59.521	49.2537	0	89.76	45.2055	191.371	133.789	38.8235	71.194	85.345	36.6667	131.055	56.332	36.8715	69.348	67.9529	48.8889	4.169	100.989	47.482	21.776	80.4891	37.2881	225.454	75.856	43.7086	0	69.939	55	67.586	102.8	51.9685	9.989	89.0215	46.1538	1.12	98.48	33.1658	165.879	87.052	43.4211	0.491	99.345	44.5946	0.635	86.688	36.6667
67	36.413	232.138	64.661	50	0	88.214	45.8904	186.111	144.381	39.4118	50.802	81.181	37.2222	139.07	62.443	37.4302	42.99	66.1858	49.6296	0.567	102.221	48.2014	18.121	77.8769	37.8531	186.925	86.887	44.3709	0	69.522	55.8333	38.822	106.783	52.7559	2.382	94.0279	46.8531	0	90.92	33.6683	161.769	89.269	44.0789	0	98.9	45.2703	0	88.502	37.2222
68	36.9565	231.012	68.355	50.7463	0	87.006	46.5753	168.144	150.432	40	38	76.02	37.7778	151.064	67.748	37.9888	25.51	64.4893	50.3704	0	104.502	48.9209	15.193	78.4227	38.4181	158.83	93.221	45.0331	0	67.136	56.6667	24.07	107.276	53.5433	0	94.7569	47.5524	0	83.92	34.1709	155.861	88.389	44.7368	0	104.506	45.9459	0	92.217	37.7778
69	37.5	220.77	68.646	51.4925	0	86.723	47.2603	141.555	149.674	40.5882	35.328	76.281	38.3333	153.263	70.457	38.5475	12.174	63.6906	51.1111	0	107.789	49.6403	10.204	75.8958	38.9831	161.075	91.373	45.6954	0	61.368	57.5	16.624	106.354	54.3307	0	94.4577	48.2517	0	79.56	34.6734	150.376	80.325	45.3947	0	113.759	46.6216	0	95.773	38.3333
70	38.0435	189.917	71.174	52.2388	0	91.735	47.9452	106.677	151.111	41.1765	39.404	81.624	38.8889	145.807	73.27	39.1061	3.478	63.2839	51.8519	0	109.222	50.3597	4.714	75.6378	39.548	173.628	90.862	46.3576	0	60.36	58.3333	10.636	102.58	55.1181	0	99.1562	48.951	0	79.88	35.1759	146.262	74.767	46.0526	0	120.929	47.2973	0	98.86	38.8889
71	38.587	151.338	78.137	52.9851	0	98.823	48.6301	74.543	149.002	41.7647	44.798	81.662	39.4444	135.338	79.332	39.6648	0.47	63.319	52.5926	0	112.434	51.0791	1.005	79.389	40.113	164.432	87.975	47.0199	0	63.188	59.1667	7.217	96.457	55.9055	0	99.9848	49.6503	0	79.68	35.6784	149.442	72.808	46.7105	0	123.666	47.973	0	102.225	39.4444
72	39.1304	117.047	90.73	53.7313	0	98.317	49.3151	47.073	143.445	42.3529	40.379	81.568	40	112.938	86.677	40.2235	0	65.6633	53.3333	0	112.497	51.7986	0	87.8424	40.678	131.406	84.39	47.6821	1.105	69.06	60	5.331	93.937	56.6929	0.387	100.682	50.3497	0	78.88	36.1809	160.566	70.426	47.3684	0	123.858	48.6486	0	96.696	40
73	39.6739	90.027	109.026	54.4776	0	98.128	50	21.546	138.285	42.9412	28.864	78.395	40.5556	84.304	95.752	40.7821	0	71.0809	54.0741	0	106.865	52.518	0	95.6532	41.2429	99.45	87.737	48.3444	1.541	77.301	60.8333	3.262	90.333	57.4803	1.999	101	51.049	0	79.56	36.6834	163.348	69.704	48.0263	0	125.806	49.3243	0	92.664	40.5556
74	40.2174	69.188	119.011	55.2239	0	100.503	50.6849	6.545	128.488	43.5294	17.239	78.493	41.1111	49.977	101.075	41.3408	0	75.2096	54.8148	0	102.426	53.2374	0	106.544	41.8079	77.401	92.807	49.0066	1.555	79.638	61.6667	1.193	84.843	58.2677	3.546	100.901	51.7483	0.44	79.88	37.1859	129.29	73.665	48.6842	0	129.576	50	0	90.466	41.1111
75	40.7609	52.089	122.947	55.9701	0	104.336	51.3699	0.913	117.007	44.1176	9.682	80.591	41.6667	20.869	99.81	41.8994	0	74.6106	55.5556	0	99.5636	53.9568	0	110.627	42.3729	61.95	99.115	49.6689	1.035	80.489	62.5	0.625	80.809	59.0551	2.972	102.714	52.4476	1	83.2	37.6884	71.268	76.467	49.3421	0	126.787	50.6757	0	91.639	41.6667
76	41.3043	38.66	121.455	56.7164	0	104.73	52.0548	0.026	107.171	44.7059	2.727	85.969	42.2222	5.376	94.575	42.4581	0	72.2372	56.2963	0	98.9252	54.6763	0	117.299	42.9379	44.899	99.78	50.3311	0.594	81.944	63.3333	0.182	81.198	59.8425	2.016	103.735	53.1469	1.44	87.32	38.191	26.338	78.12	50	0	120.935	51.3514	0	93.675	42.2222
77	41.8478	28.351	113.098	57.4627	0	99.237	52.7397	0	101.228	45.2941	0.208	93.389	42.7778	1.236	92.24	43.0168	0	79.6588	57.037	0	95.8714	55.3957	0.363	120.212	43.5028	24.507	105.535	50.9934	0.106	81.692	64.1667	0	86.255	60.6299	1.564	100.615	53.8462	2	92.52	38.6935	6.046	79.794	50.6579	0	114.14	52.027	0	91.261	42.7778
78	42.3913	19.345	107.517	58.209	0	95.62	53.4247	0	104.305	45.8824	0	97.761	43.3333	0.069	93.849	43.5754	0	82.0862	57.7778	0	92.6279	56.1151	1.09	117.046	44.0678	8.523	103.848	51.6556	0.069	80.037	65	0	95.853	61.4173	1.264	96.8569	54.5455	2	101.84	39.196	1.051	84.313	51.3158	0	108.125	52.7027	0	84.82	43.3333
79	42.9348	11.65	109.501	58.9552	0	93.62	54.1096	0	104.532	46.4706	0	102.1	43.8889	0	97.345	44.1341	0	81.649	58.5185	0	91.0549	56.8345	1.601	113.665	44.6328	1.166	101.16	52.3179	0.745	80.599	65.8333	0	104.872	62.2047	0.964	95.8555	55.2448	2	107.56	39.6985	0.073	91.719	51.9737	0	107.402	53.3784	0	78.642	43.8889
80	43.4783	5.711	113.274	59.7015	0	97.83	54.7945	0	100.318	47.0588	0	106.129	44.4444	0	103.468	44.6927	0	80.7338	59.2593	0	91.0028	57.554	2.956	114.224	45.1977	0	104.564	52.9801	1	87.705	66.6667	0	112.243	62.9921	1.615	96.8713	55.9441	2	103.04	40.201	0	97.543	52.6316	0	103.592	54.0541	0	73.399	44.4444
81	44.0217	1.945	113.921	60.4478	0.69	100	55.4795	0	96.3167	47.6471	0	106.58	45	0	107.484	45.2514	0	76.9044	60	0	92.1161	58.2734	2.031	115.07	45.7627	0	103.614	53.6424	1	101.922	67.5	2.063	117.202	63.7795	1.947	102.689	56.6434	2.44	93.16	40.7035	0	102.436	53.2895	0	100.249	54.7297	0	68.556	45
82	44.5652	0.48	112.835	61.194	1	100	56.1644	0	99.1574	48.2353	0	105.762	45.5556	0	107.423	45.8101	0	73.4137	60.7407	1.274	93.1121	58.9928	1.217	117.965	46.3277	0	104.139	54.3046	1.87	108.405	68.3333	5.38	119.513	64.5669	2.55	106.526	57.3427	3.905	85.962	41.206	0	105.296	53.9474	0	94.721	55.4054	0	61.914	45.5556
83	45.1087	0.024	105.78	61.9403	1	102.07	56.8493	0	107.925	48.8235	0	102.441	46.1111	0	100.585	46.3687	0	74.0785	61.4815	4.007	96.0638	59.7122	1	115.154	46.8927	0	108.584	54.9669	3.545	108.275	69.1667	8.634	119.902	65.3543	3.078	110.268	58.042	6.515	82.107	41.7085	0	108.101	54.6053	0	89.593	56.0811	0	55.773	46.1111
84	45.6522	0	95.871	62.6866	1	103	57.5342	0	110.685	49.4118	0	96.761	46.6667	0	89.727	46.9274	0	74.0034	62.2222	9.107	99.2168	60.4317	1	109.016	47.4576	0	110.635	55.6291	6.702	100.531	70	8.997	119.021	66.1417	4.139	106.367	58.7413	8.249	74.125	42.2111	0	103.999	55.2632	0	84.417	56.7568	0	53.43	46.6667
85	46.1957	0	93.725	63.4328	1	107.83	58.2192	0	105.523	50	0	92.799	47.2222	0	83.689	47.486	0	75.4155	62.963	16.895	99.087	61.1511	1	104.765	48.0226	0	112.668	56.2914	8.956	95.907	70.8333	5.776	113.716	66.9291	5.435	103.41	59.4406	7.139	68.509	42.7136	0	105.361	55.9211	0.18	81.245	57.4324	0	55.6	47.2222
86	46.7391	0	98.843	64.1791	1	111.38	58.9041	0	97.3652	50.5882	0	94.589	47.7778	0	83.225	48.0447	0	74.3641	63.7037	25.944	96.7764	61.8705	1.394	100.788	48.5876	0	114.087	56.9536	8.805	91.889	71.6667	2.64	109.47	67.7165	7.089	103.096	60.1399	4.928	69.587	43.2161	0	106.656	56.5789	0.758	79.041	58.1081	0	57.579	47.7778
87	47.2826	0	104.773	64.9254	1	104.41	59.589	0	92.8234	51.1765	0	97.009	48.3333	0	86.511	48.6034	0	70.2635	64.4444	30.292	97.0751	62.5899	2	95.8945	49.1525	0	113.841	57.6159	7.363	88.41	72.5	1.291	106.61	68.5039	7.05	107.555	60.8392	4	74.309	43.7186	0	105.51	57.2368	1.28	75.893	58.7838	0	61.871	48.3333
88	47.8261	0.053	105.017	65.6716	1	98.24	60.274	0	92.595	51.7647	0	97.122	48.8889	0	91.099	49.162	0.086	67.6479	65.1852	28.505	90.7524	63.3094	1.619	90.075	49.7175	0	114.968	58.2781	5.014	87.607	73.3333	1.376	103.305	69.2913	7.465	114.465	61.5385	3.767	77.408	44.2211	0	107.395	57.8947	1.188	74.509	59.4595	0	63.115	48.8889
89	48.3696	0.787	105.199	66.4179	1	98.38	60.9589	0	95.2251	52.3529	0	89.617	49.4444	0	97.803	49.7207	0	63.5978	65.9259	21.604	84.9745	64.0288	1.273	82.7849	50.2825	0	112.624	58.9404	3.712	89.781	74.1667	3.37	102.247	70.0787	9.203	121.276	62.2378	3.19	79.802	44.7236	0	110.561	58.5526	0.901	75.418	60.1351	0	61.558	49.4444
90	48.913	1.841	108.856	67.1642	1.69	99.69	61.6438	0	97.7507	52.9412	0	79.365	50	0	103.016	50.2793	0	60.798	66.6667	12.392	87.8178	64.7482	1.999	81.5375	50.8475	0.236	105.781	59.6026	3.005	90.995	75	6.215	102.308	70.8661	15.066	122.388	62.9371	3.28	80.582	45.2261	0	110.794	59.2105	1.024	75.455	60.8108	0	59.312	50
91	49.4565	0.766	106.9	67.9104	2	102.07	62.3288	0.054	106.219	53.5294	0	70.92	50.5556	0	103.99	50.838	0.345	60.1412	67.4074	5.102	94.7035	65.4676	1.39	82.4645	51.4124	1.909	102.925	60.2649	2.791	88.759	75.8333	7.607	99.402	71.6535	23.326	120.299	63.6364	3.029	81.26	45.7286	0.819	104.531	59.8684	1.364	75.827	61.4865	0	60.193	50.5556
92	50	0.688	103.43	68.6567	2	105.76	63.0137	0.87	115.322	54.1176	0	68.594	51.1111	0.392	103.869	51.3966	0.983	63.4073	68.1481	1.96	92.9454	66.1871	1.812	81.3516	51.9774	4.818	99.493	60.9272	3.409	81.892	76.6667	7.73	93.075	72.4409	31.169	116.921	64.3357	2.415	87.848	46.2312	1.025	95.39	60.5263	1.914	77.695	62.1622	0	62.291	51.1111
93	50.5435	0.716	98.627	69.403	2	102.86	63.6986	1.544	119.445	54.7059	0	72.71	51.6667	0.964	99.573	51.9553	1.51	63.635	68.8889	1.624	91.401	66.9065	2	87.4448	52.5424	7.025	95.54	61.5894	4.116	72.361	77.5	14.18	91.815	73.2283	30.241	113.558	65.035	2.165	94.718	46.7337	1.303	85.186	61.1842	2	78.744	62.8378	0.015	62.652	51.6667
94	51.087	0	92.194	70.1493	3.38	96.17	64.3836	3.657	116.902	55.2941	0	79.568	52.2222	1	95.947	52.514	1.41	62.7069	69.6296	1.303	88.7383	67.6259	2	94.3606	53.1073	7.52	93.349	62.2517	4.824	67.073	78.3333	28.21	93.988	74.0157	24.198	106.259	65.7343	2	101.06	47.2362	1.168	77.793	61.8421	2.363	78.765	63.5135	0.332	61.049	52.2222
95	51.6304	0	83.774	70.8955	4	94.69	65.0685	5	119.62	55.8824	0	84.365	52.7778	1.671	95.859	53.0726	1.288	63.2093	70.3704	1.907	89.1229	68.3453	2	96.1191	53.6723	5.432	89.353	62.9139	4.469	68.473	79.1667	43.487	93.845	74.8031	16.649	100.273	66.4336	2.374	103.907	47.7387	1	79.654	62.5	3	78.996	64.1892	1.052	59.338	52.7778
96	52.1739	0	74.027	71.6418	3.31	94.31	65.7534	5	122.576	56.4706	0.009	85.792	53.3333	1.981	95.117	53.6313	1.019	63.6029	71.1111	2.766	87.7139	69.0647	2.076	98.8489	54.2373	3.942	87.973	63.5762	4.181	74.713	80	48.768	93.799	75.5906	13.388	101.833	67.1329	2.044	101.781	48.2412	1	81.909	63.1579	3	80.732	64.8649	1.124	55.116	53.3333
97	52.7174	0	69.356	72.3881	3	90.55	66.4384	4.154	127.216	57.0588	0.067	84.916	53.8889	3.261	95.481	54.1899	1	66.9835	71.8519	2.949	83.3232	69.7842	2.326	102.296	54.8023	3.24	87.748	64.2384	4.052	76.835	80.8333	35.09	89.94	76.378	11.088	97.0216	67.8322	2.262	97.095	48.7437	1.595	82.669	63.8158	2.652	82.236	65.5405	1.415	51.932	53.8889
98	53.2609	0	67.189	73.1343	2.31	89.69	67.1233	2.852	127.55	57.6471	0.868	84.017	54.4444	3.513	96.14	54.7486	1.108	69.7767	72.5926	3	80.2786	70.5036	3.229	104.392	55.3672	2.673	94.043	64.9007	3.773	74.421	81.6667	20.147	87.76	77.1654	7.423	93.9389	68.5315	2.397	90.071	49.2462	2.366	84.68	64.4737	1.657	82.054	66.2162	1	49.222	54.4444
99	53.8043	0	65.446	73.8806	2	92.07	67.8082	2.18	119.377	58.2353	0.757	88.285	55	2.7	97.893	55.3073	1.151	66.0514	73.3333	2.726	77.0559	71.223	4.395	109.232	55.9322	2.936	103.055	65.5629	4	73.133	82.5	10.777	85.969	77.9528	3.872	93.6045	69.2308	2.041	86.325	49.7487	2.965	86.977	65.1316	1	80.429	66.8919	1.503	54.267	55
100	54.3478	0	64.425	74.6269	2	90.93	68.4932	2	119.062	58.8235	1.017	93.633	55.5556	1.796	103.991	55.8659	1.075	62.2096	74.0741	2.956	75.8543	71.9424	7.019	104.266	56.4972	3.187	104.504	66.2252	4	80.161	83.3333	6.08	87.535	78.7402	1.833	94.7077	69.9301	1.929	81.909	50.2513	3.585	84.197	65.7895	1	77.977	67.5676	1.155	61.871	55.5556
101	54.8913	0.365	64.014	75.3731	1.31	86.55	69.1781	1.249	125.694	59.4118	1.559	96.982	56.1111	1	109.435	56.4246	1	58.9034	74.8148	2.866	74.0782	72.6619	7.909	97.5524	57.0621	2.985	101.772	66.8874	4	88.734	84.1667	4.189	87.277	79.5276	1.673	93.1147	70.6294	1.325	78.244	50.7538	3.763	78	66.4474	1	77.023	68.2432	1.529	62.34	56.1111
102	55.4348	0.939	58.529	76.1194	1	83.62	69.863	1	119.812	60	3.275	96.174	56.6667	1	109.541	56.9832	1	56.5294	75.5556	2.862	76.1295	73.3813	7.549	99.5914	57.6271	2.727	103.8	67.5497	4.48	90.867	85	3.182	86.628	80.315	3.068	92.3559	71.3287	1.958	74.183	51.2563	3.438	71.283	67.1053	1	75.593	68.9189	2.787	62.382	56.6667
103	55.9783	1	54.221	76.8657	1	85.07	70.5479	1	116.619	60.5882	4.279	88.869	57.2222	1	111.742	57.5419	1	56.6536	76.2963	2.512	78.9387	74.1007	5.727	102.613	58.1921	2.041	103.056	68.2119	5.527	101.126	85.8333	1.978	92.148	81.1024	5.629	93.0897	72.028	2.3	74.232	51.7588	3	69.659	67.7632	1.319	71.75	69.5946	5.645	65.136	57.2222
104	56.5217	1.551	52.364	77.6119	1	85.31	71.2329	1	120.753	61.1765	5.62	82.584	57.7778	1	112.706	58.1006	1	57.7616	77.037	2.792	82.9497	74.8201	4.447	94.0209	58.7571	2	98.204	68.8742	6.884	116.682	86.6667	1.146	98.182	81.8898	8.246	93.1594	72.7273	2.16	73.746	52.2613	3.24	68.239	68.4211	2.418	68.39	70.2703	9.273	68.336	57.7778
105	57.0652	2.985	51.325	78.3582	1	86.38	71.9178	1	133.584	61.7647	5.024	79.978	58.3333	1	106.842	58.6592	1	57.7605	77.7778	2.985	85.9278	75.5396	3.234	80.4119	59.322	2.711	97.277	69.5364	6.76	122.003	87.5	0.399	97.995	82.6772	9.69	94.051	73.4266	2.8	71.8	52.7638	3.744	66.612	69.0789	3.74	67.799	70.9459	12.904	70.253	58.3333
106	57.6087	6.4	51.978	79.1045	1.69	84.24	72.6027	1	136.085	62.3529	6.957	80.202	58.8889	1	101.829	59.2179	1.805	58.5149	78.5185	3	86.3942	76.259	3	75.9412	59.887	3.913	94.817	70.1987	6.382	118.389	88.3333	1.197	96.284	83.4646	6.896	96.0883	74.1259	3.44	72.152	53.2663	4.436	68.439	69.7368	4.53	74.867	71.6216	13.788	73.393	58.8889
107	58.1522	12.843	58.125	79.8507	2.69	81.62	73.2877	1	132.959	62.9412	7.544	81.563	59.4444	1.816	100.295	59.7765	2	57.5412	79.2593	2.903	88.8318	76.9784	3.33	73.9629	60.452	6.322	96.888	70.8609	5	110.903	89.1667	2.35	94.147	84.252	4.827	95.2227	74.8252	4.201	72.423	53.7688	4.685	73.667	70.3947	4.331	86.989	72.2973	11.233	76.632	59.4444
108	58.6957	17.355	71.407	80.597	3.69	84.45	73.9726	1.095	129.854	63.5294	7.034	78.523	60	2.503	100.656	60.3352	2	59.876	80	2.423	91.1086	77.6978	4.404	72.9883	61.0169	8.907	96.233	71.5232	4.477	105.093	90	3.144	93.863	85.0394	3.08	85.4118	75.5245	4.721	71.131	54.2714	3.452	81.064	71.0526	3.515	96.889	72.973	7.405	78.589	60
109	59.2391	17.818	80.336	81.3433	4	88.41	74.6575	1	124.477	64.1176	4.621	76.42	60.5556	3.431	102.85	60.8939	2	60.2836	80.7407	4.615	91.3771	78.4173	5.617	72.8937	61.5819	9.433	88.311	72.1854	4.401	100.092	90.8333	3.647	97.879	85.8268	1.926	77.2409	76.2238	3.677	71.769	54.7739	2.365	84.219	71.7105	3	104.034	73.6486	4.348	77.281	60.5556
110	59.7826	14.068	86.354	82.0896	3.456	85.414	75.3425	1.207	125.091	64.7059	3.066	74.737	61.1111	4.334	106.07	61.4525	2	60.986	81.4815	11.445	94.3838	79.1367	6.332	72.5025	62.1469	7.437	82.326	72.8477	4.276	93.037	91.6667	3.016	91.901	86.6142	1.217	73.5703	76.9231	3.398	76.205	55.2764	2.084	83.331	72.3684	2.716	106.452	74.3243	2.168	72.563	61.1111
111	60.3261	9.986	92.329	82.8358	3.103	81.422	76.0274	1.329	122.181	65.2941	3.642	74.992	61.6667	4.619	105.41	62.0112	2	57.9649	82.2222	19.479	100.069	79.8561	6.299	75.8347	62.7119	5.204	82.92	73.5099	3.941	92.998	92.5	2.16	86.318	87.4016	1	73.0411	77.6224	2.635	77.322	55.7789	2	81.977	73.0263	2	105.343	75	2	65.179	61.6667
112	60.8696	6.961	96.954	83.5821	3	79.48	76.7123	1.024	115.904	65.8824	3.895	75.904	62.2222	4.091	102.764	62.5698	2	55.8709	82.963	23.018	103.428	80.5755	5.003	79.7484	63.2768	3.208	91.699	74.1722	3.143	99.34	93.3333	1.851	81.923	88.189	1	75.9531	78.3217	2	77.978	56.2814	2.035	85.824	73.6842	2	108.709	75.6757	2	59.293	62.2222
113	61.413	4.853	99.424	84.3284	2.342	77.45	77.3973	1.054	116.977	66.4706	4.054	77.523	62.7778	3.06	103.072	63.1285	2.109	53.885	83.7037	19.855	107.324	81.295	3.472	80.7258	63.8418	3	95.915	74.8344	2	96.488	94.1667	1.718	82.402	88.9764	1	79.3934	79.021	2.482	77.773	56.7839	2.997	87.869	74.3421	1.939	115.103	76.3514	2	55.994	62.7778
114	61.9565	3.544	101.626	85.0746	2	78.075	78.0822	1.633	112.827	67.0588	2.989	81.538	63.3333	2.328	101.556	63.6872	2	51.3472	84.4444	9.366	109.299	82.0144	2.592	83.1257	64.4068	3	93.621	75.4967	2	93.826	95	1.619	84.308	89.7638	1.784	88.549	79.7203	4.231	75.615	57.2864	3.011	89.958	75	1.76	115.202	77.027	2	53.944	63.3333
115	62.5	2.136	103.125	85.8209	1.496	78.546	78.7671	1.659	107.741	67.6471	1.934	87.61	63.8889	2.6	98.478	64.2458	2	47.6321	85.1852	3.662	111.326	82.7338	2.184	88.1435	64.9718	3	91.756	76.1589	2	87.589	95.8333	1.519	86.976	90.5512	3.093	96.4916	80.4196	6.648	69.445	57.7889	3.953	92.055	75.6579	2.369	112.572	77.7027	1.558	52.68	63.8889
116	63.0435	1.37	101.576	86.5672	1.101	78.643	79.4521	1.884	105.885	68.2353	1.079	88.68	64.4444	3.286	94.381	64.8045	2	43.8388	85.9259	2.097	116.394	83.4532	1.516	94.9324	65.5367	2.685	92.553	76.8212	2.408	84.371	96.6667	1.885	86.795	91.3386	4.789	93.893	81.1189	7.784	70.598	58.2915	4.339	96.068	76.3158	3.913	110.885	78.3784	1.29	51.262	64.4444
117	63.587	1	100.802	87.3134	1.621	81.533	80.137	2.03	104.073	68.8235	1.279	93.184	65	3.805	88.207	65.3631	2	42.6405	86.6667	1.792	118.308	84.1727	1.454	97.5463	66.1017	2.115	90.39	77.4834	2.958	82.023	97.5	2.255	86.854	92.126	7.074	92.9532	81.8182	6.789	71.27	58.794	4.456	98.97	76.9737	5.25	108.039	79.0541	1.248	51.511	65
118	64.1304	1.077	97.306	88.0597	1.868	84.706	80.8219	2.175	104.253	69.4118	1.576	99.437	65.5556	3.609	80.547	65.9218	2	43.4485	87.4074	2.127	116.344	84.8921	2	94.5563	66.6667	2.097	86.757	78.1457	3.422	84.122	98.3333	2.837	88.233	92.9134	8.372	86.8432	82.5175	4.514	73.224	59.2965	4.259	101.513	77.6316	5.205	98.88	79.7297	2.056	50.323	65.5556
119	64.6739	1.682	93.345	88.806	1.751	84.268	81.5068	2.321	109.127	70	1.564	99.123	66.1111	3.311	72.562	66.4804	2	46.1398	88.1481	2.329	123.134	85.6115	2	94.8578	67.2316	2.824	91.248	78.8079	3.251	92.235	99.1667	3	88.662	93.7008	8.014	79.8537	83.2168	3.228	75.469	59.799	3.2	96.91	78.2895	4.211	93.824	80.4054	2.741	48.117	66.1111
120	65.2174	2.453	91.722	89.5522	1.634	82.718	82.1918	2.984	111.14	70.5882	2	99.468	66.6667	3.015	68.486	67.0391	2	49.4156	88.8889	2.516	120.324	86.3309	2	99.7975	67.7966	2.976	94.291	79.4702	2.923	101.991	100	2.983	83.466	94.4882	6.408	76.2912	83.9161	2.523	76.978	60.3015	2.129	94.159	78.9474	2.707	95.559	81.0811	3.138	45.846	66.6667
121	65.7609	3	90.177	90.2985	1.808	84.292	82.8767	5.784	113.715	71.1765	2	100.017	67.2222	2.099	65.017	67.5978	2	53.9142	89.6296	2.118	118.748	87.0504	2.082	110.391	68.3616	2.397	93.375	80.1325	2.746	108.364				95.2756	4.524	72.7506	84.6154	2	80.846	60.804	2	97.377	79.6053	2.015	96.99	81.7568	4.464	43.202	67.2222
122	66.3043	3.242	89.421	91.0448	2	90.966	83.5616	10.715	115.971	71.7647	2	97.292	67.7778	2.116	58.294	68.1564	2.011	55.336	90.3704	2	119.293	87.7698	2.67	111.659	68.9266	2.883	92.459	80.7947	3.182	115.487				96.063	3.163	69.5357	85.3147	2	82.996	61.3065	2.819	94.672	80.2632	2	102.442	82.4324	5.789	43.765	67.7778
123	66.8478	3.361	86.708	91.791	1.578	96.907	84.2466	16.503	115.388	72.3529	2.028	94.079	68.3333	2	53.909	68.7151	2.612	56.6622	91.1111	2.123	119.65	88.4892	3.393	112.095	69.4915	3.412	93.11	81.457	4.153	113.841				96.8504	2.679	71.8944	86.014	2	81.451	61.809	3.542	89.544	80.9211	1.821	111.332	83.1081	4.885	48.918	68.3333
124	67.3913	3.329	83.425	92.5373	1.652	97.89	84.9315	17.952	110.191	72.9412	2.179	93.927	68.8889	2	55.783	69.2737	3.824	55.0667	91.8519	2.744	114.162	89.2086	3.558	112.133	70.0565	4.433	94.693	82.1192	5.942	111.115				97.6378	2.027	78.7647	86.7133	3.03	80.129	62.3116	3.971	88.145	81.5789	1.28	119.486	83.7838	3.559	56.395	68.8889
125	67.9348	4.121	81.433	93.2836	2	97.272	85.6164	14.666	105.509	73.5294	3.044	95.811	69.4444	2	62.662	69.8324	4.457	53.6555	92.5926	2.607	112.865	89.9281	3.392	107.814	70.6215	6.755	91.02	82.7815	6	113.222				98.4252	2	83.3407	87.4126	4.29	78.461	62.8141	4.039	85.618	82.2368	1.659	119.323	84.4595	2.446	58.741	69.4444
126	68.4783	4.708	74.92	94.0299	2	95.887	86.3014	8.593	103.059	74.1176	3.923	98.44	70	2.157	74.258	70.3911	4.537	54.4178	93.3333	2.589	114.836	90.6475	3.093	102.489	71.1864	10.008	87.728	83.4437	6.669	111.418				99.2126	2	87.4979	88.1119	5.802	77.695	63.3166	4.809	81.612	82.8947	3.021	112.913	85.1351	2	58.589	70
127	69.0217	4.559	70.008	94.7761	2	91.611	86.9863	5.286	97.2265	74.7059	3.154	99.323	70.5556	3.477	89.331	70.9497	3.697	58.1245	94.0741	2.113	113.508	91.3669	3	103.188	71.7514	11.773	84.739	84.106	6.346	111.981				100	2.634	90.9996	88.8112	5.692	75.167	63.8191	4.269	85.145	83.5526	3.54	102.093	85.8108	2	58.765	70.5556
128	69.5652	4.011	66.118	95.5224	2	87.828	87.6712	3.674	97.0456	75.2941	2.038	99.646	71.1111	7.185	101.35	71.5084	3	61.4019	94.8148	2.751	107.684	92.0863	3	105.207	72.3164	11.349	86.936	84.7682	5.328	111.022							89.5105	4.438	74.563	64.3216	4	87.037	84.2105	3.499	92.367	86.4865	2	59.928	71.1111
129	70.1087	3.657	58.838	96.2687	1.624	86.372	88.3562	3.224	102.816	75.8824	2	101.007	71.6667	13.088	98.874	72.067	3	66.4184	95.5556	3.546	106.065	92.8058	3	106.958	72.8814	10.517	88.351	85.4305	5.097	108.784							90.2098	3.81	76.825	64.8241	3.304	83.582	84.8684	2.801	85.911	87.1622	2	63.083	71.6667
130	70.6522	2.429	52.554	97.0149	1.009	84.082	89.0411	3.246	108.067	76.4706	1.983	106.152	72.2222	16.009	95.673	72.6257	2.175	63.7176	96.2963	4.357	105.381	93.5252	3	109.389	73.4463	10.101	86	86.0927	5.519	109.37							90.9091	3.805	82.868	65.3266	3	82.613	85.5263	1.805	81.334	87.8378	2	63.718	72.2222
131	71.1957	2.138	52.594	97.7612	1	82.932	89.726	3.024	115.176	77.0588	2	107.666	72.7778	16.411	90.248	73.1844	2	56.6766	97.037	3.911	101.447	94.2446	3	112.732	74.0113	11.475	84.104	86.755	5.893	112.969							91.6084	3.957	87.911	65.8291	2.454	81.415	86.1842	1	78.603	88.5135	2	67.143	72.7778
132	71.7391	2	56.292	98.5075	1	84.129	90.411	3.33	122.79	77.6471	2	107.843	73.3333	15.719	86.078	73.743	2	53.5204	97.7778	3.291	95.5735	94.964	3.912	112.504	74.5763	12.257	85.795	87.4172	5.69	119.435							92.3077	2.987	87.451	66.3317	2.129	79.336	86.8421	1	77.41	89.1892	2	69.746	73.3333
133	72.2826	2	60.609	99.2537	1.39	90.332	91.0959	2.782	131.308	78.2353	2.08	109.79	73.8889	12.846	83.111	74.3017	2	53.8201	98.5185	3	94.4971	95.6835	4.415	116.832	75.1412	10.062	91.022	88.0795	4.807	120.538							93.007	2.309	84.57	66.8342	2	80.188	87.5	1	75.828	89.8649	2	75.825	73.8889
134	72.8261	2	65.758	100	2.366	97.783	91.7808	2.45	138.203	78.8235	2	112.066	74.4444	7.946	80.829	74.8603	2	52.781	99.2593	2.967	94.829	96.4029	4.713	115.527	75.7062	6.889	93.658	88.7417	4.399	119.222							93.7063	1.524	79.7	67.3367	2	82.661	88.1579	1	78.051	90.5405	2	78.443	74.4444
135	73.3696	2.027	77.944				92.4658	3	139	79.4118	2	108.843	75	5.276	78.581	75.419	2	51.7891	100	3.113	90.1364	97.1223	4.17	111.93	76.2712	3.876	91.918	89.404	4.795	117.266							94.4056	1	74.578	67.8392	2.544	83.208	88.8158	1.177	75.801	91.2162	2	84.014	75
136	73.913	3.078	86.731				93.1507	3	141.394	80	2.003	101.402	75.5556	3.352	77.888	75.9777	2	54.4223				97.8417	3.843	106.518	76.8362	2.409	89.863	90.0662	4.775	117.72							95.1049	1.297	71.193	68.3417	3	86.226	89.4737	2.463	72.723	91.8919	2.441	86.602	75.5556
137	74.4565	4.326	90.601				93.8356	5.043	143.662	80.5882	2.871	92.596	76.1111	2.539	78.174	76.5363	2	57.1949				98.5612	2.797	102.378	77.4011	2.086	89.862	90.7285	4.113	126.3							95.8042	2	71.021	68.8442	2.972	89.68	90.1316	5.032	71.655	92.5676	3.493	81.54	76.1111
138	75	4.967	89.319				94.5205	6.148	147.536	81.1765	3.739	88.445	76.6667	2.303	79.332	77.095	2	58.4265				99.2806	2.817	106.201	77.9661	2.275	91.363	91.3907	3.387	137.495							96.5035	2.026	72.055	69.3467	2.928	87.46	90.7895	7.345	69.983	93.2432	3.872	74.271	76.6667
139	75.5435	5.711	85.647				95.2055	5.586	148.423	81.7647	4.607	93.442	77.2222	2	77.688	77.6536	2	58.54				100	3	110.109	78.5311	2.53	92.04	92.053	3	147.521							97.2028	2	71.854	69.8492	3	83.555	91.4474	8.706	70.546	93.9189	3.789	70.75	77.2222
140	76.087	6	81.22				95.8904	4.067	138.671	82.3529	5.679	103.338	77.7778	2.062	74.987	78.2123	2	59.3208							79.096	2.656	92.083	92.7152	2.638	151.509							97.9021	2	71.633	70.3518	3.484	87.954	92.1053	7.685	72.208	94.5946	3.706	71.933	77.7778
141	76.6304	5.512	76.475				96.5753	2.456	129.364	82.9412	7.184	113.198	78.3333	2.118	73.879	78.7709	2	63.909							79.661	3.44	91.832	93.3775	2.553	146.292							98.6014	2.003	73.502	70.8543	4.113	90.607	92.7632	5.654	74.148	95.2703	3.95	76.652	78.3333
142	77.1739	5.175	71.541				97.2603	1.515	128.019	83.5294	8.896	123.856	78.8889	2.149	73.852	79.3296	2	66.8975							80.226	3.848	92.995	94.0397	3.152	142.481							99.3007	1.669	77.586	71.3568	4.757	89.203	93.4211	3.563	77.775	95.9459	4.601	84.707	78.8889
143	77.7174	5.998	69				97.9452	1	124.783	84.1176	9.721	130.319	79.4444	2	77.845	79.8883	2	66.1359							80.791	3.414	92.082	94.702	4.326	142.36							100	1.05	81.612	71.8593	4.751	86.786	94.0789	2	84.044	96.6216	4.914	92.322	79.4444
144	78.2609	6.606	69.235				98.6301	1.291	124.295	84.7059	11.077	128.91	80	2.736	81.312	80.4469	2	61.4996							81.3559	3.117	91.218	95.3642	5.658	136.04										72.3618	3.929	81.497	94.7368	1.86	86.815	97.2973	4.556	94.94	80
145	78.8043	7.989	70.312				99.3151	1.986	122.258	85.2941	9.128	124.374	80.5556	3.589	82.757	81.0056	2	58.1915							81.9209	2.374	87.621	96.0265	7.626	135.251										72.8643	3.057	77.773	95.3947	1.279	79.415	97.973	3.78	96.766	80.5556
146	79.3478	6.766	72.698				100	2	116.09	85.8824	6.988	122.579	81.1111	4.912	84.264	81.5642	2	55.3664							82.4859	2	83.832	96.6887	6.533	131.247										73.3668	2.99	76.669	96.0526	1.521	71.535	98.6486	3.609	99.153	81.1111
147	79.8913	5.458	78.139							86.4706	6.114	122.925	81.6667	6.32	85.059	82.1229	2	56.328							83.0508	1.718	82.81	97.351	5.106	122.388										73.8693	2.787	79.888	96.7105	1.764	67.192	99.3243	4	98.746	81.6667
148	80.4348	5.568	84.79							87.0588	6.346	119.19	82.2222	5.891	84.845	82.6816	2	60.8681							83.6158	1.264	81.71	98.0132	4.011	114.205										74.3719	2.702	83.095	97.3684	2	61.928	100	4	97.041	82.2222
149	80.9783	5.417	86.573							87.6471	6.946	115.202	82.7778	4.497	85.507	83.2402	2	60.2154							84.1808	1	81.653	98.6755	3.092	113.957										74.8744	2.788	82.937	98.0263	2	59.508				82.7778
150	81.5217	4.473	87.089							88.2353	6.239	105.747	83.3333	3.145	89.612	83.7989	2	61.483							84.7458	1	81.372	99.3377	3	116.117										75.3769	3	82.234	98.6842	2.491	62.899				83.3333
151	82.0652	3.809	87.671							88.8235	5.532	98.171	83.8889	2.614	88.514	84.3575	2	66.1921							85.3107	1.596	78.671	100	3.526	113.284										75.8794	3	84.22	99.3421	3.202	68.679				83.8889
152	82.6087	3.085	84.05							89.4118	4.681	96.959	84.4444	2	85.269	84.9162	2	69.1157							85.8757	2.57	74.15													76.3819	2.168	90.009	100	3.023	75.389				84.4444
153	83.1522	2.764	75.834							90	4.014	96.494	85	2	82.365	85.4749	1.869	68.169							86.4407	3.959	71.768													76.8844	2	94.32							85
154	83.6957	2	67.578							90.5882	4	102.27	85.5556	2.348	77.617	86.0335	1.469	64.7373							87.0056	5.456	71.839													77.3869	2	92.68							85.5556
155	84.2391	2.042	60.7							91.1765	4.088	111.434	86.1111	3	75.861	86.5922	2	64.4716							87.5706	5.611	69.46													77.8894	2	93.672							86.1111
156	84.7826	2.945	62.265							91.7647	5.007	121.01	86.6667	3.148	78.551	87.1508	2	68.0159							88.1356	4.985	65.331													78.392	2.791	89.663							86.6667
157	85.3261	3.847	65.117							92.3529	5.916	126.16	87.2222	5.33	84.552	87.7095	2	72.3195							88.7006	4.185	62.869													78.8945	3.781	84.714							87.2222
158	85.8696	4.411	68.703							92.9412	6.592	133.932	87.7778	8.594	92.986	88.2682	2.466	81.7211							89.2655	3.266	65.848													79.397	5.568	82.385							87.7778
159	86.413	4.847	68.653							93.5294	7.751	139.548	88.3333	10.889	100.716	88.8268	3.005	88.0461							89.8305	3.025	73.628													79.8995	7.983	83.901							88.3333
160	86.9565	5.314	66.681							94.1176	6.336	138.748	88.8889	12.9	104.098	89.3855	3.281	89.588							90.3955	3.264	84.91													80.402	8.25	92.262							88.8889
161	87.5	5.468	64.716							94.7059	4.674	139.248	89.4444	13.573	103.243	89.9441	2.738	89.2986							90.9605	3.603	94.435													80.9045	6.633	101.845							89.4444
162	88.0435	4.573	61.558							95.2941	3.754	138.319	90	12.531	95.908	90.5028	2.195	86.2739							91.5254	3.855	100.576													81.407	4.13	107.913							90
163	88.587	3.505	58.733							95.8824	3.047	139.73	90.5556	9.804	87.094	91.0615	2	81.5467							92.0904	4.804	100.673													81.9095	2.605	108.004							90.5556
164	89.1304	2.727	60.058							96.4706	3	128	91.1111	5.563	83.377	91.6201	2	79.7204							92.6554	6.154	95.593													82.4121	2.053	104.395							91.1111
165	89.6739	2.898	61.749							97.0588	3	117.895	91.6667	3.263	84.14	92.1788	2	76.655							93.2203	7.272	93.624													82.9146	2	96.957							91.6667
166	90.2174	3	65.405							97.6471	3.702	114.631	92.2222	3.508	87.158	92.7374	2	74.1814							93.7853	7.9	93.731													83.4171	2.691	91.927							92.2222
167	90.7609	3	70.762							98.2353	4.343	117.799	92.7778	5.084	90.798	93.2961	2	73.6359							94.3503	6.924	92.924													83.9196	3.163	90.837							92.7778
168	91.3043	3.246	76.302							98.8235	5.487	122.595	93.3333	6.865	92.147	93.8547	2	74.2038							94.9153	5.207	92.044													84.4221	3.382	92.887							93.3333
169	91.8478	2.756	78.988							99.4118	6	127.299	93.8889	7.356	93.483	94.4134	2	74.0829							95.4802	4.353	93.153													84.9246	3.523	96.328							93.8889
170	92.3913	2	77.844							100	5.621	129.67	94.4444	6.601	94.443	94.9721	2	74.361							96.0452	3.752	90.022													85.4271	3.232	97.014							94.4444
171	92.9348	2.02	80.657										95	5.08	97.403	95.5307	2	74.9978							96.6102	2.947	84.524													85.9296	3	96.949							95
172	93.4783	2.115	76.931										95.5556	4.188	100.241	96.0894	2	73.9223							97.1751	2.413	83.748													86.4322	2.369	98.4							95.5556
173	94.0217	2.032	76.352										96.1111	3.519	104.28	96.648	2	70.5645							97.7401	2	81.667													86.9347	2.137	99.363							96.1111
174	94.5652	2	73.611										96.6667	2.666	109.009	97.2067	2	66.4907							98.3051	2.007	74.096													87.4372	3.118	97.966							96.6667
175	95.1087	2.104	68.752										97.2222	2	111.826	97.7654	2	62.6671							98.8701	2	65.188													87.9397	3.673	95.073							97.2222
176	95.6522	2	66.027										97.7778	2.017	116.632	98.324	2	60.7678							99.435	2	62.406													88.4422	3.853	92.304							97.7778
177	96.1957	2	64.658										98.3333	2	123.832	98.8827	2	63.8874							100	2	60.63													88.9447	3.476	86.846							98.3333
178	96.7391	2	59.702										98.8889	2.747	134.206	99.4413	2	67.3896																						89.4472	2.779	80.355							98.8889
179	97.2826	2	61.001										99.4444	2.942	138.473	100	2.029	67.5196																						89.9497	2.769	75.988							99.4444
180	97.8261	2	67.178										100	3.454	128.8																									90.4523	2.706	74.156							100
181	98.3696	2	78.807																																					90.9548	2.182	78.111
182	98.913	2.026	92.449																																					91.4573	2	83.333
183	99.4565	2.093	98.801																																					91.9598	2	82.561
184	100	2.939	106.22																																					92.4623	2	84.028
185																																								92.9648	2	87.58
186																																								93.4673	2.305	88.469
187																																								93.9698	3.282	82.526
188																																								94.4724	4.258	79.477
189																																								94.9749	5	79.033
190																																								95.4774	4.827	77.383
191																																								95.9799	3.822	83.126
192																																								96.4824	2.952	85.536
193																																								96.9849	2.219	88.648
194																																								97.4874	2	84.934
195																																								97.9899	2	85.452
196																																								98.4925	2	87.604
197																																								98.995	2.035	93.539
198																																								99.4975	2	93.011
199																																								100	2	88.615
	0			0			0			0			0			0			0			0			0			0			0			0			0			0			0			0			0
	2.5	3.1422	148.003	2.5	4.66575	202.608	2.5	3.01975	184.814	2.5	8.7812	192.897	2.5	1.8082	188.423	2.5	2.0354	131.462	2.5	1	158.287	2.5	2.15575	144.243	2.5	2.7	168.722	2.5	4.20325	153.072	2.5	1.79525	165.861	2.5	18.437	136.198	2.5	1.084	239.709	2.5	3.6876	176.744	2.5	2.31875	167.417	2.5	13.758	171.447	2.5
	5	3.6216	98.8182	5	2.028	124.206	5	4.88825	150.194	5	4.24925	149.203	5	17.1916	155.338	5	7.79925	99.7429	5	1.03067	140.448	5	4.06067	124.881	5	10.278	138.79	5	9.29325	139.24	5	1.69	155.455	5	9.318	119.259	5	0.56975	187.016	5	17.9578	145.792	5	6.41225	171.916	5	4.3635	109.568	5
	7.5	4.63475	88.4612	7.5	3.0345	73.2182	7.5	7.877	130.181	7.5	2.31525	89.399	7.5	17.62	109.681	7.5	6.5374	69.5502	7.5	3.1875	121.242	7.5	8.42375	113.942	7.5	13.3194	76.021	7.5	11.9252	125.788	7.5	8.03475	141.3	7.5	2.14767	77.4014	7.5	0.884333	118.766	7.5	7.0646	100.895	7.5	9.977	123.508	7.5	3.266	53.386	7.5
	10	1.7382	94.0986	10	4.83033	78.3973	10	4.02625	107.045	10	3.3714	66.4492	10	6.704	74.8292	10	2.701	71.1151	10	4.181	91.5422	10	9.39467	95.2612	10	23.586	86.933	10	2.41575	80.458	10	13.3858	112.576	10	3.84067	71.0395	10	0.032	99.0585	10	5.8712	79.1602	10	3.08325	76.0652	10	4.29033	53.9797	10
	12.5	2.9666	99.9632	12.5	4.72667	105.474	12.5	3.64675	114.975	12.5	3.904	73.96	12.5	5.9462	82.2522	12.5	4.229	69.6283	12.5	8.68333	77.0209	12.5	1.6935	75.3622	12.5	29.3342	83.7028	12.5	2.37167	68.9937	12.5	6.85725	84.1243	12.5	15.014	80.4869	12.5	0	74.102	12.5	3.5734	72.3894	12.5	6.60425	82.905	12.5	8.44475	56.5145	12.5
	15	12.381	64.6964	15	6.007	138.607	15	3.204	117.762	15	1.76	74.42	15	4.1834	91.1976	15	1.9135	81.399	15	24.1425	90.7967	15	0	78.6665	15	11.3195	86.9097	15	6.502	85.6883	15	4.49625	86.626	15	10.0622	78.1991	15	0	86.561	15	2.1806	66.3648	15	5.387	76.9235	15	5.4005	49.6307	15
	17.5	4.4258	50.9126	17.5	12.1753	176.478	17.5	2.8375	133.521	17.5	1.98	64.06	17.5	3.4378	93.36	17.5	2.248	77.376	17.5	10.5177	99.764	17.5	0	86.9445	17.5	15.794	88.8762	17.5	7.569	107.813	17.5	1.90245	88.5742	17.5	22.5287	84.602	17.5	0	90.0383	17.5	1.3742	68.4208	17.5	0.1645	75.8992	17.5	1.30433	45.95	17.5
	20	1.97125	74.4002	20	15.7267	167.807	20	2.1065	115.781	20	1.92	77.376	20	2.6708	81.4344	20	0.87	73.71	20	10.7985	102.141	20	0	89.4159	20	10.6138	82.544	20	1.63825	123.035	20	0.116451	89.9933	20	16.9383	93.9743	20	0.109333	87.1563	20	0	97.3816	20	0.008	81.6685	20	0	48.7435	20
	22.5	6.0764	83.6408	22.5	11.975	154.95	22.5	5.43033	122.609	22.5	0	85.2246	22.5	3.675	93.5538	22.5	0	76.184	22.5	1.832	90.3019	22.5	0	80.1702	22.5	1.51	81.276	22.5	0	139.244	22.5	0.83325	87.6215	22.5	41.7483	92.5813	22.5	29.554	102.008	22.5	0	115.335	22.5	0	101.947	22.5	0	51.8285	22.5
	25	5.2784	81.1264	25	2.54	150.033	25	2.329	139.672	25	0	81.9013	25	3.0872	109.076	25	0	77.59	25	0	108.033	25	0	75.5401	25	0.0122	79.4832	25	2.486	129.727	25	1.64875	84.7237	25	101.584	107.995	25	122.814	114.832	25	0.5246	118.559	25	0	92.236	25	0	72.8282	25
	27.5	2.996	83.7198	27.5	1.42667	146.807	27.5	0	149.223	27.5	4.281	78.3795	27.5	0	102.568	27.5	26.72	79.384	27.5	0.473	125.897	27.5	0	76.1696	27.5	0.01025	98.3342	27.5	16.2497	124.943	27.5	0.57475	86.417	27.5	63.2033	124.726	27.5	198.926	102.927	27.5	53.5378	96.938	27.5	0	86.7177	27.5	8.4825	77.0445	27.5
	30	39.4092	53.11	30	41.715	114.825	30	0	133.588	30	85.6882	78.1136	30	1.7888	88.0626	30	144.17	63.02	30	10.604	121.277	30	0.0406667	98.8779	30	15.151	108.275	30	122.318	105.216	30	0	93.1355	30	7.44175	137.193	30	143.775	84.054	30	125.987	98.6662	30	1.347	85.5187	30	74.3503	81.824	30
	32.5	149.91	44.058	32.5	113.46	83.7733	32.5	0.575	115.033	32.5	208.867	90.366	32.5	45.1564	70.756	32.5	166.776	62.024	32.5	42.4273	106.89	32.5	15.497	104.97	32.5	50.791	85.1705	32.5	132.21	70.062	32.5	0	98.2483	32.5	14.0783	131.768	32.5	130.38	82.946	32.5	148.277	90.1138	32.5	32.897	83.929	32.5	154.333	77.1213	32.5
	35	190.214	51.0872	35	160.653	64.08	35	43.9015	131.241	35	150.277	103.674	35	114.936	62.231	35	137.81	60.47	35	156.246	95.6422	35	123.151	76.2956	35	107.176	66.2232	35	166.393	49.5863	35	2.8075	94.1678	35	79.7377	107.044	35	84.7935	102.167	35	161.541	85.5842	35	115.074	69.799	35	140.15	54.165	35
	37.5	227.766	63.5582	37.5	141.375	63.165	37.5	103.052	135.181	37.5	131.128	93.4672	37.5	131.306	55.5182	37.5	91.255	63.9288	37.5	208.224	80.7283	37.5	197.248	54.8353	37.5	225.376	65.4246	37.5	186.985	50.6542	37.5	27.938	80.8897	37.5	157.231	97.1775	37.5	45.053	125.59	37.5	149.782	72.274	37.5	145.51	58.5287	37.5	168.066	57.1775	37.5
	40	153.82	83.5426	40	122.987	74.64	40	145.385	109.68	40	74.348	85.2756	40	139.682	75.4968	40	10.408	63.6957	40	158.128	89.6095	40	154.373	60.4628	40	170.114	90.5857	40	88.693	69.7873	40	85.2945	70.4078	40	177.385	92.5924	40	23.7325	134.344	40	20.9552	82.0826	40	176.848	62.0078	40	163	80.7632	40
	42.5	41.5266	116.806	42.5	124.427	85.16	42.5	178.612	102.323	42.5	39.5818	79.431	42.5	54.6928	95.5778	42.5	0	71.7603	42.5	114.642	92.6532	42.5	175.245	67.3264	42.5	106.928	90.4048	42.5	31.6493	74.555	42.5	177.647	66.3107	42.5	205.976	71.6561	42.5	2.84733	116.882	42.5	0	103.475	42.5	71.4745	96.4045	42.5	84.8893	70.9967	42.5
	45	4.9465	112.383	45	125.965	99.505	45	176.793	132.258	45	14.628	80.862	45	0.261	98.8772	45	0	81.0319	45	167.849	97.2022	45	145.616	71.798	45	19.7737	102.581	45	0.370667	70.0873	45	182.377	72.3158	45	143.097	55.2678	45	5.85	118.335	45	0	107.097	45	1.601	101.245	45	9.62325	83.7107	45
	47.5	0.0048	99.7984	47.5	30.485	105.747	47.5	171.795	144.569	47.5	0.052	99.8448	47.5	0	97.7816	47.5	0	74.7631	47.5	90.6215	83.2934	47.5	44.8918	79.1678	47.5	0	106.307	47.5	0	63.013	47.5	170.539	77.1728	47.5	85.7317	62.2291	47.5	1.41333	98.6267	47.5	0.863	94.7388	47.5	0	120.553	47.5	0	93.838	47.5
	50	0.827	105.88	50	0.147	92.4492	50	62.4598	145.461	50	0	100.869	50	0	92.3308	50	0.0215	68.9683	50	7.204	99.2013	50	14.506	77.3985	50	0	113.891	50	1.309	76.622	50	173.739	86.7195	50	77.4037	66.5182	50	0	80.76	50	1.7852	83.1778	50	0	125.776	50	0	95.5127	50
	52.5	0.2808	90.4104	52.5	0	88.4195	52.5	7.2575	122.738	52.5	0	94.2272	52.5	0.4712	101.279	52.5	0.7095	61.9954	52.5	0	107.171	52.5	1.90633	80.9564	52.5	1.74075	105.206	52.5	0.3785	81.068	52.5	150.61	90.9515	52.5	24.999	80.5515	52.5	0.36	80.38	52.5	3.4052	74.2756	52.5	0	112.65	52.5	0	91.7602	52.5
	55	0.073	66.086	55	0	98.4227	55	0	102.596	55	0	72.8972	55	2.6252	96.098	55	1.165	65.2559	55	0	108.555	55	0	107.531	55	5.4318	90.7926	55	1.85375	101.577	55	121.031	98.3305	55	0.794	94.4142	55	1.81333	93.8933	55	3.7364	74.8002	55	0	97.0388	55	0	76.3542	55
	57.5	1.61875	54.1098	57.5	0	102.202	57.5	0	101.133	57.5	0.019	83.6602	57.5	1.4992	106.52	57.5	1.0565	60.9235	57.5	0	98.1201	57.5	1.018	116.974	57.5	2.94525	100.844	57.5	8.15433	96.109	57.5	36.7755	105.803	57.5	0.5965	100.206	57.5	2.58625	97.4305	57.5	2.4254	85.7918	57.5	0.5545	80.149	57.5	0	56.6793	57.5
	60	13.6968	69.64	60	0	95.69	60	0	101.599	60	1.4952	91.8182	60	1.4638	104.466	60	1.361	57.6464	60	0	91.7004	60	1.801	115.603	60	2.6784	99.4308	60	4.7735	89.1983	60	9.952	99.832	60	2.84467	102.45	60	7.301	74.9137	60	4.0414	97.1032	60	1.11925	75.3023	60	0	60.855	60
	62.5	5.496	98.6916	62.5	0.896667	100.69	62.5	0.0135	97.9475	62.5	5.031	85.5614	62.5	3.7956	103.55	62.5	2	59.7776	62.5	3.597	95.1272	62.5	1.13133	104.856	62.5	8.02475	90.9395	62.5	3.785	77.5212	62.5	2.60275	87.4805	62.5	1.264	97.7758	62.5	3.97125	75.2765	62.5	2.8922	92.7794	62.5	2.31925	78.55	62.5	0	60.8385	62.5
	65	1.453	99.2308	65	1	106.655	65	2.02367	117.223	65	5.56625	77.8108	65	3.0158	97.1388	65	2.0218	50.5148	65	24.377	97.6462	65	1.72275	87.573	65	3.4824	91.1822	65	4.11875	73.6105	65	0.20175	86.0288	65	2.03733	102.029	65	2.908	83.23	65	4.0842	84.5988	65	2.57725	81.0045	65	0.63075	59.5387	65
	67.5	3.077	88.2906	67.5	1.23	98.77	67.5	4.2515	124.24	67.5	3.645	77.4892	67.5	3.1678	74.9638	67.5	2	45.4111	67.5	16.9007	89.5621	67.5	1.734	83.7536	67.5	2.43025	90.237	67.5	4	80.676	67.5	0.51575	107.542	67.5	4.21733	106.682	67.5	2.14575	100.367	67.5	2.3166	81.2426	67.5	1	77.7555	67.5	1.306	51.807	67.5
	70	4.34975	73.1197	70	2	103.563	70	1.60725	120.986	70	1.4864	93.6068	70	2.0546	60.9812	70	2.9808	54.9269	70	1.629	91.0282	70	2.1005	97.9061	70	2.917	93.3088	70	5.91275	107.669	70	6.2685	118.91	70	7.20133	108.372	70	2.15725	88.85	70	2.8888	86.0258	70	3.00175	70.7015	70	2.779	62.9323	70
	72.5	2.4448	56.1774	72.5	3.4225	93.93	72.5	1	123.652	72.5	1.9184	97.9958	72.5	8.3832	91.8972	72.5	3.5585	60.0906	72.5	2.54067	86.72	72.5	4.881	105.963	72.5	8.8636	89.0232	72.5	5.065	108.619	72.5	4.676	112.204	72.5	19.691	120.221	72.5	1.861	75.553	72.5	4.2068	87.2094	72.5	3.3905	98.591	72.5	11.7995	72.1535	72.5
	75	3.2796	82.0706	75	2.10333	90.8967	75	1.02375	130.844	75	3.075	96.8752	75	11.6396	83.7694	75	2.035	56.1031	75	2.887	76.8167	75	6.408	98.4444	75	11.0875	86.0625	75	3.34	95.4657	75	3.063	103.618	75	23.696	106.697	75	3.15025	72.5302	75	2.8648	80.0724	75	1.92475	111.089	75	3.98025	73.403	75
	77.5	5.473	80.8404	77.5	1.10333	85.08	77.5	1.1535	120.038	77.5	2.00525	103.618	77.5	3.094	78.3326	77.5	2	55.4582	77.5	2.722	79.3393	77.5	3.188	76.772	77.5	5.0644	91.2646	77.5	2.3415	86.9522	77.5	8.933	96.65	77.5	10.633	97.5979	77.5	3.932	73.035	77.5	2.4336	88.6926	77.5	3.323	111.674	77.5	2	58.6025	77.5
	80	6.5634	71.8768	80	1.595	84.3875	80	1.72533	108.818	80	2.0166	107.989	80	2.213	76.375	80	2	62.9606	80	2.82775	88.0656	80	5.663	73.5548	80	2.72525	91.8295	80	3.19867	92.7827	80	33.6613	93.3618	80	2.45933	93.809	80	2.837	77.172	80	4.4246	86.867	80	3.5345	96.3133	80	1.538	51.444	80
	82.5	4.81675	86.5307	82.5	3.71533	86.0913	82.5	2.3775	107.148	82.5	3.7798	95.8446	82.5	4.6896	83.6474	82.5	2	57.8464	82.5	9.4905	94.2346	82.5	3.689	81.2	82.5	2.9506	89.5496	82.5	4.00575	112.202	82.5	28.6955	89.367	82.5	5.64767	92.8683	82.5	7.07367	70.4377	82.5	4.7342	102.884	82.5	1.69	113.146	82.5	4.033	45.2325	82.5
	85	2.5672	70.0854	85	2.815	79.4507	85	12.7385	113.816	85	9.2195	124.071	85	2.8512	86.2534	85	2	63.5749	85	17.413	106.684	85	1.7885	93.7946	85	1.2455	81.8863	85	6.08575	111.911	85	6.057	86.8522	85	7.13767	95.1207	85	3.06625	76.6292	85	2.9518	93.7872	85	3.21525	98.321	85	3.63	54.6847	85
	87.5	4.7774	66.774	87.5	1.5545	79.1993	87.5	9.515	101.931	87.5	7.144	122.267	87.5	3.1652	79.7892	87.5	1.8345	66.3484	87.5	2.4195	115.593	87.5	2.02733	101.682	87.5	3.39525	74.107	87.5	5.54975	112.639	87.5	1.67625	93.7383	87.5	1.80575	77.316	87.5	2.83	80.7593	87.5	2.7712	97.9384	87.5	1.20125	78.2938	87.5	2	60.0912	87.5
	90	3.8342	61.3628	90	1.751	83.8973	90	3.292	105.776	90	5.4824	102.515	90	11.6974	99.3902	90	2.698	84.1947	90	2.321	120.736	90	3.25325	110.925	90	4.2144	67.4272	90	4.667	119.009	90	1.7725	95.5722	90	1.26133	81.2985	90	5.31067	75.8083	90	3.31	86.1132	90	1.41	75.6008	90	2	69.108	90
	92.5	2.8004	73.8602	92.5	1.79533	90.7217	92.5	2.8905	132.825	92.5	4.605	111.474	92.5	6.9338	87.5354	92.5	2.04875	81.049	92.5	2.289	117.702	92.5	3.031	103.628	92.5	3.8815	95.1485	92.5	3.81875	132.259	92.5	2.99175	92.4903	92.5	4.98533	94.4459	92.5	3.63975	83.7637	92.5	2.1776	80.4378	92.5	7.192	71.098	92.5	2.147	83.0197	92.5
	95	2.04175	76.8877	95	1.913	95.665	95	4.73033	144.197	95	6.33825	137.869	95	6.1972	93.6548	95	2	74.093	95	2.515	112.223	95	3.228	110.396	95	6.6914	93.5832	95	3.16725	145.661	95	1.837	83.7377	95	7.598	80.996	95	1.611	79.616	95	3.369	83.417	95	3.26925	80.6955	95	3.715	74.6235	95
	97.5	2.0208	64.028	97.5	1.54433	86.094	97.5	3.406	136.119	97.5	3.20025	130.986	97.5	3.4906	104.552	97.5	2	71.4938	97.5	3.938	104.297	97.5	4.43267	114.763	97.5	3.36625	87.8618	97.5	6.23075	131.232	97.5	1.8195	86.2332	97.5	3.45533	71.3936	97.5	1.83075	71.5307	97.5	3.164	83.9254	97.5	1.641	70.0175	97.5	4.50525	87.1552	97.5
	100	2.2116	88.691	100	1.439	88.794	100	1.56925	121.856	100	5.0306	122.399	100	2.632	128.389	100	2.0058	64.4463	100	3.09275	93.759	100	3.11425	106.301	100	2.0014	68.7974	100	3.40725	114.391	100	2.76875	86.8038	100	2.16525	85.1507	100	1.6805	76.0832	100	2.007	89.6442	100	2.679	66.6188	100	3.84725	97.9265	100
[truncated: 50 more columns]

## Sheet: Summary
	FISH	PI	FISH	PI	FISH	PI
	Mean	Mean	STDDEV	STDDEV	SEM	SEM
2.5	3.93522	171.9	3.68297	23.6431	0.661481	4.24642
5	6.09041	141.929	4.27329	22.7392	0.767505	4.08408
7.5	8.31976	107.431	6.31516	21.9383	1.13424	3.94024
10	6.37315	89.9954	5.38124	16.6734	0.966499	2.99462
12.5	5.31945	84.4044	5.53542	16.3163	0.994192	2.93049
15	4.18291	87.2635	4.84667	18.0135	0.870488	3.23531
17.5	4.55288	91.5121	5.18029	24.4133	0.930408	4.38477
20	3.30905	93.4219	4.52769	22.6267	0.813197	4.06387
22.5	4.64848	96.9242	8.97468	22.9432	1.6119	4.12073
25	10.5433	101.134	27.5286	20.541	4.94429	3.68927
27.5	14.8016	102.076	37.4713	20.4644	6.73005	3.67551
30	31.9816	98.8839	45.1436	19.0181	8.10804	3.41574
32.5	68.1487	95.0467	63.1593	20.6794	11.3438	3.71413
35	108.017	88.6547	67.1406	24.1889	12.0588	4.34446
37.5	133.783	83.339	63.3339	25.5881	11.3751	4.59576
40	116.718	81.2892	48.3061	22.0452	8.67604	3.95943
42.5	95.8979	85.0939	66.9562	20.4615	12.0257	3.675
45	71.0108	92.7007	75.4476	20.7123	13.5508	3.72004
47.5	42.1543	95.2119	58.6214	19.5624	10.5287	3.51351
50	21.1865	97.6141	40.2775	20.4692	7.23406	3.67637
52.5	8.32618	95.6702	26.8303	19.3802	4.81887	3.48079
55	5.46618	95.6163	21.2341	16.8802	3.81376	3.03178
57.5	4.29892	93.4036	10.7605	16.836	1.93265	3.02384
60	3.05494	91.4433	3.39579	15.2965	0.609901	2.74734
62.5	2.90578	89.4788	1.95497	15.6093	0.351123	2.80351
65	3.63355	87.6505	4.50223	16.9864	0.808625	3.05085
67.5	3.60553	84.7929	3.82962	17.3834	0.687819	3.12215
70	3.13289	87.4683	1.83366	17.0021	0.329336	3.05366
72.5	5.01803	91.3045	4.11459	17.6299	0.739002	3.16643
75	5.02911	90.0302	4.57486	18.0123	0.821668	3.2351
77.5	3.56488	86.7072	2.26076	18.0221	0.406045	3.23687
80	4.27408	86.6722	5.79038	14.2013	1.03998	2.55063
82.5	4.38482	88.637	4.85653	17.0174	0.872259	3.05642
85	4.21642	90.3404	3.63692	19.0411	0.65321	3.41988
87.5	3.597	89.3305	2.3145	18.1466	0.415697	3.25923
90	3.56701	93.8356	2.33465	17.6024	0.419315	3.16149
92.5	3.34486	98.3019	1.74604	17.6645	0.313598	3.17264
95	3.58365	99.303	1.89891	21.02	0.341054	3.7753
97.5	3.37868	96.3558	1.86782	19.9721	0.335471	3.5871
100	3.23661	97.0778	1.66706	18.4637	0.299413	3.31617
