# Supplementary material for: Large domains of heterochromatin direct the formation of short mitotic chromosome loops
Source: eLife. 2020 Sep 11;9:e57212. doi: 10.7554/eLife.57212 (PMC7515631; doi:10.7554/eLife.57212)
Supplement: Figure 5—source data 7. [file elife-57212-fig5-data7.xlsx]

## Sheet: NP-T1 H3K9me3
		%IP 1 (ChIP 40 - NPD3)	%IP 2 (ChIP 40 - NPD4)	%IP 3 (ChIP43)	Mean %IP	STDEV	SEM		% Sat 1	% Sat 2	% Sat 3	Mean %Sat	STDEV	SEM
Mac1	No Antibody	0.0143636	0.0316176	0.0615288	0.0358367	0.0194848	0.0112496		0.00457152	0.0165685	0.00099167	0.00737724	0.00666151	0.00384603
	H3K9me3	0.665787	0.440915	31.1439	10.7502	14.4208	8.32587		0.211901	0.231052	0.501952	0.314968	0.132448	0.0764691
ChrI_Inter	No Antibody	0.0307772	0.0390111	0.0266717	0.0321534	0.00513066	0.00296219		0.00979548	0.0204429	0.000429873	0.0102228	0.00817587	0.00472034
	H3K9me3	0.599887	0.626363	31.9659	11.0641	14.7798	8.53315		0.190926	0.328232	0.5152	0.344786	0.132901	0.0767302
Hut1	No Antibody	0.0143049	0.0224045	0.073012	0.0365738	0.025977	0.0149978		0.00455282	0.0117406	0.00117675	0.00582338	0.00440524	0.00254337
	H3K9me3	0.629133	0.576994	30.6242	10.6101	14.1521	8.17072		0.200235	0.302361	0.493575	0.332057	0.121583	0.0701958
Pcn1	No Antibody	0.0192804	0.0128345	0.0875988	0.0399046	0.0338274	0.0195303		0.00613638	0.00672565	0.00141184	0.00475796	0.00237826	0.00137309
	H3K9me3	0.664393	0.426505	25.6842	8.92505	11.8509	6.84214		0.211457	0.2235	0.413957	0.282972	0.0927513	0.05355
Ura4	No Antibody	0.00702106	0.00958919	0.0736216	0.0300773	0.0308083	0.0177872		0.0022346	0.005025	0.00118657	0.00281539	0.00161995	0.000935281
	H3K9me3	0.592857	0.345903	39.1769	13.3719	18.2472	10.535		0.188689	0.181263	0.631421	0.333791	0.210478	0.121519
Omh3	No Antibody	0.00430534	0.00545279	0.0760786	0.0286122	0.0335671	0.0193799		0.00137026	0.00285741	0.00122617	0.00181795	0.000737363	0.000425717
	H3K9me3	0.678783	0.607744	29.4882	10.2583	13.5977	7.85062		0.216037	0.318475	0.475267	0.336593	0.106603	0.0615472
ChrII_LTR	No Antibody	0.0117169	0.020635	3.54472	1.19236	1.66338	0.960351		0.00372916	0.0108133	0.0571309	0.0238911	0.0236813	0.0136724
	H3K9me3	0.50857	0.43661	31.6826	10.8759	14.7126	8.49431		0.161863	0.228796	0.510634	0.300431	0.151127	0.0872531
NeoS	No Antibody	0.000642493	0.00270205	0.0861774	0.0298406	0.039845	0.0230045		0.000204487	0.00141595	0.00138894	0.00100312	0.000564829	0.000326104
	H3K9me3	0.0780852	0.0535137	7.58546	2.57235	3.54482	2.0466		0.0248522	0.0280426	0.122256	0.0583837	0.0451834	0.0260867
mAct	No Antibody	0.00110927	0.00211913	0.0808622	0.0280302	0.0373601	0.0215699		0.000353048	0.00111048	0.00130327	0.000922267	0.000410121	0.000236784
	H3K9me3	0.0702488	0.0607759	6.72984	2.28695	3.14159	1.8138		0.0223581	0.0318482	0.108466	0.0542241	0.0385499	0.0222568
Hoxc8	No Antibody	0.00314681	0.00823392	0.086365	0.0325819	0.0380871	0.0219896		0.00100154	0.0043148	0.00139196	0.0022361	0.00147848	0.000853602
	H3K9me3	0.319918	0.303311	11.1122	3.91181	5.09146	2.93955		0.10182	0.158943	0.179097	0.14662	0.0327294	0.0188963
MaSat	No Antibody	0.00560957	0.00724231	0.0180145	0.0102888	0.0055034	0.00317739		0.00178536	0.00379517	0.000290342	0.00195696	0.00143598	0.000829061
	H3K9me3	3.14198	1.9083	62.0457	22.3653	28.0628	16.202		1	1	1	1	0	0
