# Supplementary material for: Large domains of heterochromatin direct the formation of short mitotic chromosome loops
Source: eLife. 2020 Sep 11;9:e57212. doi: 10.7554/eLife.57212 (PMC7515631; doi:10.7554/eLife.57212)
Supplement: Figure 5—source data 8. [file elife-57212-fig5-data8.xlsx]

## Sheet: NP-T2 H3K9me3
		%IP 1 (ChIP42)	%IP 2 (ChIP43)	%IP 3 (ChIP53)	Mean %IP	STDEV	SEM		% Sat 1	% Sat 2	% Sat 3	Mean %Sat	STDEV	SEM
Rad3	No Antibody	0.0662107	0.00531541	0.00462141	0.0253825	0.0288713	0.0166688		0.00115342	9.11727e-05	0.0011172	0.000787264	0.000492433	0.000284306
	H3K9me3	17.6667	42.1448	1.11181	20.3078	16.8554	9.73148		0.307761	0.722889	0.268775	0.433142	0.2055	0.118645
Mac1	No Antibody	0.268772	0.00268819	0.456891	0.242784	0.186336	0.107581		0.0046821	4.61093e-05	0.110451	0.0383931	0.0509879	0.0294379
	H3K9me3	18.4271	30.523	1.71082	16.887	11.8128	6.82014		0.321007	0.523546	0.413582	0.419378	0.0827878	0.0477976
Hut1	No Antibody	0.0883724	0.00128161	0.00691139	0.0321885	0.0397945	0.0229753		0.00153948	2.19829e-05	0.0016708	0.00107742	0.000748229	0.00043199
	H3K9me3	15.4209	28.9882	0.867639	15.0922	11.4825	6.62943		0.268638	0.497221	0.209747	0.325202	0.123989	0.0715849
Pcn1	No Antibody	0.0750542	0.00344712	0.010057	0.0295194	0.0323108	0.0186547		0.00130747	5.91268e-05	0.00243122	0.00126594	0.00096885	0.000559366
	H3K9me3	10.3908	21.962	0.664491	11.0058	8.70555	5.02615		0.181012	0.376704	0.160637	0.239451	0.0974084	0.0562388
Ura4	No Antibody	0.137055	0.00607366	0.00410776	0.0490787	0.0622136	0.0359191		0.00238755	0.000104179	0.00099303	0.00116159	0.00093977	0.000542576
	H3K9me3	15.0694	39.582	1.13823	18.5965	15.8915	9.17498		0.262514	0.678931	0.27516	0.405535	0.193389	0.111653
Omh3	No Antibody	0.131375	0.0114274	0.0988507	0.0805511	0.0506494	0.0292424		0.00228861	0.000196008	0.0238967	0.00879376	0.0107135	0.00618543
	H3K9me3	16.8922	27.6259	1.00746	15.1752	10.9345	6.31306		0.294269	0.473854	0.243549	0.337224	0.0988059	0.0570456
NeoP	No Antibody	0.0621183	0.00432877	0.00247504	0.022974	0.0276895	0.0159865		0.00108212	7.42493e-05	0.000598328	0.0005849	0.000411573	0.000237622
	H3K9me3	28.8767	51.3028	2.47491	27.5515	19.9559	11.5216		0.503043	0.879972	0.598297	0.660438	0.160031	0.0923941
mAct	No Antibody	0.0390523	0.00405728	0.00403063	0.0157134	0.0165031	0.00952807		0.000680306	6.95926e-05	0.000974384	0.000574761	0.000376844	0.000217571
	H3K9me3	3.62823	9.95687	0.166238	4.58378	4.05372	2.34041		0.0632051	0.170785	0.0401873	0.0913926	0.0569203	0.0328629
Hoxc8	No Antibody	0.0186684	0.0063161	0.00233237	0.00910564	0.00695476	0.00401533		0.000325211	0.000108337	0.000563839	0.000332462	0.000186028	0.000107404
	H3K9me3	5.45069	17.0942	0.271378	7.60542	7.03486	4.06158		0.0949531	0.293208	0.0656042	0.151255	0.101089	0.0583636
MaSat	No Antibody	0.080699	0.00106655	0.00267208	0.0281459	0.0371665	0.0214581		0.00140581	1.8294e-05	0.000645963	0.000690021	0.000567306	0.000327534
	H3K9me3	57.404	58.3005	4.13659	39.947	25.3244	14.6211		1	1	1	1	0	0
