# Supplementary material for: Large domains of heterochromatin direct the formation of short mitotic chromosome loops
Source: eLife. 2020 Sep 11;9:e57212. doi: 10.7554/eLife.57212 (PMC7515631; doi:10.7554/eLife.57212)
Supplement: Figure 5—source data 9. [file elife-57212-fig5-data9.xlsx]

## Sheet: NP-T3 H3K9me3
% IP	NPT_C606				Mean	STDEV	SEM
	ChIP 52A	ChIP 53A	ChIP 53B
Rad3	0.486134	1.04673	1.28713		0.94	0.335602	0.19376
Mac1	0.905008	1.4495	1.91724		1.42392	0.413638	0.238814
ChrI_inter	0.39787	0.830954	1.28318		0.837334	0.361453	0.208685
Pol5	0.738648	1.12287	1.72676		1.19609	0.406703	0.23481
Pcn1	0.334182	0.794275	1.07996		0.736138	0.307223	0.177375
Ura4	0.408147	0.793739	1.01741		0.739765	0.251641	0.145285
LTR1	0.339243	1.0383	1.43431		0.937286	0.452731	0.261384
NeoP	0.774355	1.92147	1.4904		1.39541	0.473098	0.273144
mAct	0.108028	0.218199	0.430761		0.25233	0.133947	0.0773345
Hoxc8	0.283045	0.271579	0.878032		0.477552	0.283221	0.163518
mSat	0.625742	1.37524	1.73326		1.24475	0.461463	0.266426
% Sat	NPT_C606				Mean	STDEV	SEM
	ChIP 52A	ChIP 53A	ChIP 53B
Rad3	0.776892	0.761128	0.742606		0.760208	0.0140122	0.00808992
Mac1	1.44629	1.054	1.10614		1.20215	0.173946	0.100428
ChrI_inter	0.635837	0.604224	0.740325		0.660129	0.0581574	0.0335772
Pol5	1.18044	0.816492	0.996247		0.997724	0.148583	0.0857844
Pcn1	0.534057	0.577553	0.623076		0.578229	0.036345	0.0209838
Ura4	0.652261	0.577164	0.586991		0.605472	0.0333274	0.0192416
LTR1	0.542145	0.754996	0.827522		0.708221	0.121108	0.069922
NeoP	1.2375	1.39718	0.859881		1.16485	0.225287	0.13007
mAct	0.17264	0.158662	0.248526		0.193276	0.0394822	0.0227951
Hoxc8	0.452335	0.197477	0.506577		0.385463	0.134758	0.0778027
mSat	1	1	1		1	0	0

## Sheet: No Antibody
% IP	NPT_C606				Mean	STDEV	SEM
	ChIP 52A	ChIP 53A	ChIP 53B
Rad3	0.00332195	0.00962226	0.00912274		0.00735565	0.00285954	0.00165095
Mac1	0.00840746	0.0239807	0.017047		0.0164784	0.00637046	0.00367799
ChrI_inter	0.00381305	0.0289563	0.0249691		0.0192461	0.0110336	0.00637024
Pol5	0.0136031	0.0373465	0.0234388		0.0247961	0.00974062	0.00562375
Pcn1	0.00227181	0.00774458	0.00191747		0.00397795	0.00266733	0.00153998
Ura4	0.000573421	0.00838269	0.00668105		0.00521239	0.003353	0.00193586
LTR1	0.00286474	0.0137749	0.00767593		0.00810521	0.0044644	0.00257752
NeoP	0.00102366	0.00832357	0.00480392		0.00471705	0.00298081	0.00172097
mAct	0.0122908	0.252514	0.00189622		0.0889004	0.11577	0.0668399
Hoxc8	0.000451804	0	0.0017799		0.000743903	0.000755428	0.000436146
mSat	0.000335947	0.00157458	0.00268097		0.0015305	0.000957858	0.00055302
% Sat	NPT_C606				Mean	STDEV	SEM
	ChIP 52A	ChIP 53A	ChIP 53B
Rad3	0.00530881	0.00699678	0.00526333		0.00585631	0.000806648	0.000465719
Mac1	0.013436	0.0174375	0.00983519		0.0135696	0.00310506	0.00179271
ChrI_inter	0.00609363	0.0210554	0.0144058		0.0138516	0.00612068	0.00353378
Pol5	0.0217391	0.0271563	0.0135229		0.0208061	0.00560477	0.00323591
Pcn1	0.00363058	0.00563143	0.00110628		0.0034561	0.0018515	0.00106897
Ura4	0.000916385	0.00609543	0.00385461		0.00362214	0.00212072	0.0012244
LTR1	0.00457814	0.0100164	0.0044286		0.00634104	0.00259957	0.00150086
NeoP	0.00163592	0.00605245	0.0027716		0.00348666	0.00187259	0.00108114
mAct	0.019642	0.183614	0.00109402		0.0681168	0.0820194	0.0473539
Hoxc8	0.000722028	0	0.00102691		0.000582979	0.00043061	0.000248613
mSat	0.000536877	0.00114495	0.00154678		0.0010762	0.000415145	0.000239684
mSat (H3K9me3)	0.625742	1.37524	1.73326

## Sheet: All data
		H3K9me3				No Antibody
% Sat		Mean	STDEV	SEM		Mean	STDEV	SEM
Rad3		0.760208	0.0140122	0.00808992		0.00585631	0.000806648	0.000465719
Mac1		1.20215	0.173946	0.100428		0.0135696	0.00310506	0.00179271
ChrI_inter		0.660129	0.0581574	0.0335772		0.0138516	0.00612068	0.00353378
Pol5		0.997724	0.148583	0.0857844		0.0208061	0.00560477	0.00323591
Pcn1		0.578229	0.036345	0.0209838		0.0034561	0.0018515	0.00106897
Ura4		0.605472	0.0333274	0.0192416		0.00362214	0.00212072	0.0012244
LTR1		0.708221	0.121108	0.069922		0.00634104	0.00259957	0.00150086
NeoP		1.16485	0.225287	0.13007		0.00348666	0.00187259	0.00108114
mAct		0.193276	0.0394822	0.0227951		0.0681168	0.0820194	0.0473539
Hoxc8		0.385463	0.134758	0.0778027		0.000582979	0.00043061	0.000248613
mSat		1	0	0		0.0010762	0.000415145	0.000239684
