# Supplementary material for: Large domains of heterochromatin direct the formation of short mitotic chromosome loops
Source: eLife. 2020 Sep 11;9:e57212. doi: 10.7554/eLife.57212 (PMC7515631; doi:10.7554/eLife.57212)
Supplement: Figure 5—source data 10. [file elife-57212-fig5-data10.xlsx]

## Sheet: NP-T4 H3K9me3
% IP					Mean	STDEV	SEM
	ChIP54	ChIP55 A	ChIP55 B
Rad3	0.654427	0.353823	1.6018		0.870015	0.5318	0.307035
ChrI_inter	1.20945	0.398725	0.918197		0.842123	0.335319	0.193596
Pol5	0.719	0.355875	0.582		0.552292	0.149726	0.0864446
Pcn1	1.04974	0.34209	0.577827		0.656551	0.29421	0.169862
Ura4	0.600798	0.296758	0.382959		0.426838	0.127943	0.0738679
Omh3	1.17521	0.381907	1.08222		0.879778	0.354089	0.204434
Mpg1	1.03966	0.512053	1.17632		0.909345	0.286414	0.165361
LTR1	0.658514	0.214727	0.63443		0.502557	0.203764	0.117643
LTR2	1.07915	0.227987	0.840189		0.715775	0.358448	0.20695
LTR3	0.73745	0.507937	0.92496		0.723449	0.170537	0.0984593
NeoP	0.133797	0.0743959	0.11841		0.108868	0.0251717	0.0145329
mAct	0.149561	0.118953	0.208173		0.158896	0.0370172	0.0213719
Hoxc8	0.441916	0.245213	0.37944		0.355523	0.0820652	0.0473804
mSat	1.08732	0.457148	1.1542		0.899557	0.314019	0.181299
% Sat					Mean	STDEV	SEM
	ChIP54	ChIP55 A	ChIP55 B
Rad3	0.601871	0.773979	1.3878		0.921216	0.337321	0.194753
ChrI_inter	1.11232	0.872202	0.795527		0.926682	0.134945	0.0779107
Pol5	0.661258	0.778467	0.504246		0.64799	0.112343	0.0648612
Pcn1	0.965434	0.748314	0.50063		0.738126	0.189892	0.109634
Ura4	0.552549	0.649151	0.331796		0.511165	0.132823	0.0766856
Omh3	1.08083	0.835411	0.937633		0.951292	0.100657	0.0581143
Mpg1	0.956169	1.1201	1.01916		1.03181	0.0675206	0.038983
LTR1	0.60563	0.46971	0.54967		0.54167	0.0557767	0.0322027
LTR2	0.992483	0.498716	0.72794		0.739713	0.201751	0.116481
LTR3	0.678227	1.1111	0.801386		0.86357	0.182108	0.10514
NeoP	0.123052	0.162739	0.102591		0.129461	0.02497	0.0144165
mAct	0.13755	0.260207	0.180362		0.192706	0.05083	0.0293467
Hoxc8	0.406426	0.536397	0.328747		0.423857	0.0856639	0.0494581
mSat	1	1	1		1	0	0

## Sheet: No Antibody
% IP					Mean	STDEV	SEM
	ChIP54	ChIP55 A	ChIP55 B
Rad3	0.0274714	0.0017761	0.00275143		0.0106663	0.0118897	0.00686451
ChrI_inter	0.120167	0.0019151	0.000853341		0.0409785	0.0559964	0.0323295
Pol5	0.0667152	0.00357365	0.00288825		0.0243924	0.0299281	0.017279
Pcn1	0.0702979	0.0253129	0		0.0318703	0.0290712	0.0167842
Ura4	0.0101554	0.00358242	0.0017517		0.00516317	0.00360829	0.00208325
Omh3	0.0691079	0.00238547	0		0.0238311	0.0320303	0.0184927
Mpg1	0.081182	0	0		0.0270607	0.0382696	0.022095
LTR1	0.0747196	0	0		0.0249065	0.0352232	0.0203361
LTR2	0.111074	0	0		0.0370246	0.0523607	0.0302305
LTR3	0.0366263	0.00931751	0.00201758		0.0159871	0.0148953	0.00859979
NeoP	0.00357049	0.00119722	0.001772		0.0021799	0.0010109	0.000583644
mAct	0.00268882	0.00125333	0.0279468		0.0106297	0.0122591	0.00707779
Hoxc8	0.00453818	0.000266767	0		0.00160165	0.00207929	0.00120048
mSat	0.00121608	0.000422122	1.38759e-06		0.00054653	0.000503639	0.000290776
% Sat					Mean	STDEV	SEM
	ChIP54	ChIP55 A	ChIP55 B
Rad3	0.0252653	0.00388518	0.00238384		0.0105114	0.0104505	0.00603361
ChrI_inter	0.110517	0.00418923	0.000739335		0.0384817	0.0509558	0.0294193
Pol5	0.0613574	0.00781726	0.00250238		0.0238923	0.0265805	0.0153463
Pcn1	0.0646524	0.0553713	0		0.0400079	0.0285425	0.016479
Ura4	0.00933983	0.00783645	0.00151768		0.00623132	0.00338909	0.00195669
Omh3	0.063558	0.00521816	0		0.0229254	0.0288105	0.0166337
Mpg1	0.0746624	0	0		0.0248875	0.0351962	0.0203205
LTR1	0.068719	0	0		0.0229063	0.0323944	0.0187029
LTR2	0.102154	0	0		0.0340512	0.0481557	0.0278027
LTR3	0.0336849	0.0203818	0.00174803		0.0186049	0.0130986	0.00756246
NeoP	0.00328375	0.0026189	0.00153527		0.0024793	0.000720607	0.000416042
mAct	0.00247289	0.00274163	0.0242131		0.00980922	0.0101857	0.00588072
Hoxc8	0.00417372	0.000583546	0		0.00158576	0.00184541	0.00106545
mSat	0.00111842	0.000923381	1.20221e-06		0.000681001	0.00048724	0.000281308
mSat (H3K9me3)	1.08732	0.457148	1.1542

## Sheet: All data
		H3K9me3				No Antibody
% Sat		Mean	STDEV	SEM		Mean	STDEV	SEM
Rad3		0.921216	0.337321	0.194753		0.0105114	0.0104505	0.00603361
ChrI_inter		0.926682	0.134945	0.0779107		0.0384817	0.0509558	0.0294193
Pol5		0.64799	0.112343	0.0648612		0.0238923	0.0265805	0.0153463
Pcn1		0.738126	0.189892	0.109634		0.0400079	0.0285425	0.016479
Ura4		0.511165	0.132823	0.0766856		0.00623132	0.00338909	0.00195669
Omh3		0.951292	0.100657	0.0581143		0.0229254	0.0288105	0.0166337
Mpg1		1.03181	0.0675206	0.038983		0.0248875	0.0351962	0.0203205
LTR1		0.54167	0.0557767	0.0322027		0.0229063	0.0323944	0.0187029
LTR2		0.739713	0.201751	0.116481		0.0340512	0.0481557	0.0278027
LTR3		0.86357	0.182108	0.10514		0.0186049	0.0130986	0.00756246
NeoP		0.129461	0.02497	0.0144165		0.0024793	0.000720607	0.000416042
mAct		0.192706	0.05083	0.0293467		0.00980922	0.0101857	0.00588072
Hoxc8		0.423857	0.0856639	0.0494581		0.00158576	0.00184541	0.00106545
mSat		1	0	0		0.000681001	0.00048724	0.000281308
