# Supplementary material for: Large domains of heterochromatin direct the formation of short mitotic chromosome loops
Source: eLife. 2020 Sep 11;9:e57212. doi: 10.7554/eLife.57212 (PMC7515631; doi:10.7554/eLife.57212)
Supplement: Figure 5—source data 11. [file elife-57212-fig5-data11.xlsx]

## Sheet: NP-T5 H3K9me3
% IP					Mean	STDEV	SEM
	ChIP 49A	ChIP 49B	ChIP50
Rad3	0.404608	0.43522	0.38138		0.407069	0.0220492	0.0127301
Mac1	0.543904	0.704162	0.441124		0.563063	0.108236	0.0624901
ChrI_inter	0.343156	0.303499	0.256456		0.301037	0.0354381	0.0204602
Pol5	0.454587	0.390717	0.343016		0.396107	0.045708	0.0263896
Pcn1	0.45096	0.423781	0.277921		0.38422	0.0759798	0.0438669
Ura4	0.429122	0.541689	0.504436		0.491749	0.0468226	0.027033
Omh3	0.39064	0.567512	0.296206		0.418119	0.112452	0.064924
Mpg1	0.472952	0.510396	0.47433		0.485893	0.0173357	0.0100088
LTR1	0.510356	0.486094	0.341678		0.446043	0.074459	0.042989
LTR2	0.456985	0.514057	0.32854		0.433194	0.0775826	0.0447924
NeoP	1.27903	1.10803	1.26762		1.21823	0.0780587	0.0450672
mAct	0.112607	0.181027	0.0817242		0.125119	0.0414943	0.0239568
Hoxc8	0.207021	0.473095	0.146739		0.275618	0.141789	0.0818619
mSat	0.682727	0.537651	0.308034		0.509471	0.15426	0.0890622
% Sat					Mean	STDEV	SEM
	ChIP 49A	ChIP 49B	ChIP50
Rad3	0.592635	0.809484	1.23811		0.880076	0.268199	0.154845
Mac1	0.796663	1.3097	1.43206		1.17948	0.27526	0.158921
ChrI_inter	0.502625	0.564491	0.832556		0.633224	0.143194	0.0826731
Pol5	0.66584	0.726711	1.11356		0.835372	0.198275	0.114474
Pcn1	0.660527	0.788208	0.90224		0.783658	0.0987316	0.0570027
Ura4	0.628541	1.00751	1.6376		1.09122	0.416176	0.240279
Omh3	0.572177	1.05554	0.961601		0.863105	0.209262	0.120817
Mpg1	0.692739	0.949307	1.53986		1.06064	0.354684	0.204777
LTR1	0.747526	0.904107	1.10922		0.920284	0.148103	0.0855076
LTR2	0.669353	0.956115	1.06657		0.897347	0.167404	0.0966506
NeoP	1.87341	2.06087	4.1152		2.68316	1.01549	0.586295
mAct	0.164937	0.336699	0.265309		0.255648	0.0704537	0.0406764
Hoxc8	0.303226	0.879928	0.476373		0.553176	0.24162	0.139499
mSat	1	1	1		1	0	0

## Sheet: No antibody
% IP					Mean	STDEV	SEM
	ChIP 49A	ChIP 49B	ChIP50
Rad3	0.00460069	0.00532712	0.00895		0.0062926	0.00190232	0.00109831
Mac1	0.00390046	0.00254796	0.00554902		0.00399915	0.00122717	0.000708505
ChrI_inter	0.00492512	0.00580231	0.0043004		0.00500928	0.000616035	0.000355668
Pol5	0.00456705	0.0038246	0.0080685		0.00548672	0.00185059	0.00106844
Pcn1	0.0045856	0.00297772	0.00357711		0.00371348	0.000663458	0.000383048
Ura4	0.0161398	0.00226312	0.00293743		0.00711344	0.00638851	0.00368841
Omh3	0.00395246	0.00288833	0.00424618		0.00369566	0.000583324	0.000336782
Mpg1	0.00464238	0.00386187	0.00576115		0.00475513	0.000779463	0.000450023
LTR1	0.00308886	0.00239851	0.00483677		0.00344138	0.00102615	0.00059245
LTR2	0.00411937	0.00762387	0.00193208		0.00455844	0.00234431	0.00135349
NeoP	0.00305097	0.0026555	0.00160014		0.00243554	0.000612382	0.000353559
mAct	0.00370326	0.00191369	0.0288925		0.0115032	0.0123178	0.0071117
Hoxc8	0.00416027	0.00100126	0.00262674		0.00259609	0.00128984	0.000744691
mSat	0.00385541	0.0010363	0.00130129		0.00206434	0.00127109	0.000733866
% Sat					Mean	STDEV	SEM
	ChIP 49A	ChIP 49B	ChIP50
Rad3	0.00673869	0.00990813	0.0290552		0.015234	0.00985836	0.00569172
Mac1	0.00571306	0.00473905	0.0180143		0.00948881	0.00604155	0.00348809
ChrI_inter	0.0072139	0.010792	0.0139608		0.0106555	0.00275609	0.00159123
Pol5	0.00668942	0.00711353	0.0261935		0.0133322	0.00909601	0.00525159
Pcn1	0.00671659	0.00553838	0.0116127		0.0079559	0.00263012	0.0015185
Ura4	0.0236401	0.00420927	0.00953607		0.0124618	0.00819795	0.00473309
Omh3	0.00578922	0.00537213	0.0137848		0.00831538	0.0038712	0.00223504
Mpg1	0.00679976	0.00718286	0.0187029		0.0108952	0.00552313	0.00318878
LTR1	0.00452429	0.00446109	0.0157021		0.00822915	0.00528422	0.00305084
LTR2	0.0060337	0.0141799	0.00627229		0.00882865	0.00378519	0.00218538
NeoP	0.0044688	0.00493908	0.00519468		0.00486752	0.000300629	0.000173568
mAct	0.00542422	0.00355935	0.0937966		0.03426	0.0421056	0.0243097
Hoxc8	0.0060936	0.00186228	0.00852744		0.00549444	0.00275383	0.00158992
mSat	0.00564707	0.00192747	0.00422451		0.00393302	0.00153245	0.00088476
mSat (H3K9me3)	0.682727	0.537651	0.308034

## Sheet: All Data
	H3K9me3				No antibody
% Sat	Mean	STDEV	SEM		Mean	STDEV	SEM
Rad3	0.880076	0.268199	0.154845		0.015234	0.00985836	0.00569172
Mac1	1.17948	0.27526	0.158921		0.00948881	0.00604155	0.00348809
ChrI_inter	0.633224	0.143194	0.0826731		0.0106555	0.00275609	0.00159123
Pol5	0.835372	0.198275	0.114474		0.0133322	0.00909601	0.00525159
Pcn1	0.783658	0.0987316	0.0570027		0.0079559	0.00263012	0.0015185
Ura4	1.09122	0.416176	0.240279		0.0124618	0.00819795	0.00473309
Omh3	0.863105	0.209262	0.120817		0.00831538	0.0038712	0.00223504
Mpg1	1.06064	0.354684	0.204777		0.0108952	0.00552313	0.00318878
LTR1	0.920284	0.148103	0.0855076		0.00822915	0.00528422	0.00305084
LTR2	0.897347	0.167404	0.0966506		0.00882865	0.00378519	0.00218538
NeoP	2.68316	1.01549	0.586295		0.00486752	0.000300629	0.000173568
mAct	0.255648	0.0704537	0.0406764		0.03426	0.0421056	0.0243097
Hoxc8	0.553176	0.24162	0.139499		0.00549444	0.00275383	0.00158992
mSat	1	0	0		0.00393302	0.00153245	0.00088476
