# Supplementary material for: Large domains of heterochromatin direct the formation of short mitotic chromosome loops
Source: eLife. 2020 Sep 11;9:e57212. doi: 10.7554/eLife.57212 (PMC7515631; doi:10.7554/eLife.57212)
Supplement: Figure 5—source data 12. [file elife-57212-fig5-data12.xlsx]

## Sheet: NP-T6 H3K9me3
% IP					Mean	STDEV	SEM
	ChIP50	ChIP 53	ChIP55
Rad3	0.17889	2.64426	1.81406		1.54573	1.02421	0.591327
Mac1	0.261118	3.19206	1.82387		1.75902	1.19743	0.691337
ChrI_inter	0.150194	2.42561	1.00718		1.19433	0.938313	0.541735
Pol5	0.211139	2.42419	1.3638		1.33304	0.903738	0.521773
Pcn1	0.207071	2.3048	1.37074		1.2942	0.858101	0.495425
Ura4	0.21266	2.84235	1.37857		1.47786	1.07586	0.621147
Omh3	0.214984	2.64191	1.28749		1.38146	0.993016	0.573318
Mpg1	0.227156	2.73841	1.69849		1.55469	1.03025	0.594813
LTR1	0.170497	2.44102	1.2649		1.29214	0.927139	0.535284
LTR2	0.197568	2.99503	1.4641		1.55223	1.14376	0.660348
NeoP	0.331344	5.61136	3.68617		3.20963	2.18174	1.25963
mAct	0.0466657	0.424818	0.27114		0.247541	0.155279	0.0896506
Hoxc8	0.113687	0.828781	0.684751		0.542406	0.3088	0.178286
mSat	0.0999898	2.15991	1.17731		1.14574	0.841255	0.485699
% Sat					Mean	STDEV	SEM
	ChIP50	ChIP 53	ChIP55
Rad3	1.78908	1.22424	1.54085		1.51806	0.231156	0.133458
Mac1	2.61145	1.47787	1.54918		1.8795	0.518384	0.299289
ChrI_inter	1.50209	1.12301	0.85549		1.1602	0.265281	0.15316
Pol5	2.1116	1.12236	1.1584		1.46412	0.458076	0.26447
Pcn1	2.07092	1.06708	1.1643		1.4341	0.452048	0.26099
Ura4	2.12682	1.31596	1.17095		1.53791	0.42061	0.24284
Omh3	2.15006	1.22316	1.09358		1.48893	0.470469	0.271625
Mpg1	2.27179	1.26784	1.44268		1.66077	0.437914	0.25283
LTR1	1.70514	1.13015	1.0744		1.30323	0.285105	0.164606
LTR2	1.97588	1.38664	1.24359		1.53537	0.316915	0.182971
NeoP	3.31378	2.59796	3.131		3.01425	0.30367	0.175324
mAct	0.466704	0.196683	0.230304		0.297897	0.120151	0.0693692
Hoxc8	1.13698	0.383711	0.581622		0.700772	0.318854	0.18409
mSat	1	1	1		1	0	0

## Sheet: No antibody
% IP					Mean	STDEV	SEM
	ChIP50	ChIP 53	ChIP55
Rad3	0.00107761	0.406128	0.0157496		0.140985	0.18758	0.108299
Mac1	0.000803739	0.401451	0.00998766		0.137414	0.18674	0.107814
ChrI_inter	0.00111627	0.299263	0.0108661		0.103748	0.138307	0.0798516
Pol5	0.00371618	0.368527	0.0243945		0.132213	0.167313	0.0965981
Pcn1	0.00139996	0.297871	0.0136288		0.1043	0.136966	0.0790775
Ura4	0.000319413	0.291678	0.0245628		0.10552	0.132005	0.0762133
Omh3	0.00319494	0.266886	0.0223121		0.0974644	0.120053	0.0693128
Mpg1	0.00263508	0.335645	0.0168529		0.118378	0.153741	0.0887622
LTR1	0.00129864	0.29557	0.0143064		0.103725	0.135759	0.0783803
LTR2	0.00136094	0.305289	0.00594682		0.104199	0.142204	0.0821018
NeoP	0.000405766	0.372308	0.0158388		0.129518	0.171794	0.0991856
mAct	0.0159092	0.215965	0.0136206		0.0818316	0.0948512	0.0547624
Hoxc8	0.000115422	0.41556	0.0252454		0.146974	0.190196	0.10981
mSat	0.0001846	0.228275	0.0162862		0.0815819	0.103936	0.0600073
% Sat					Mean	STDEV	SEM
	ChIP50	ChIP 53	ChIP55
Rad3	0.0107772	0.18803	0.0133776		0.0707282	0.0829516	0.0478921
Mac1	0.00803821	0.185865	0.00848344		0.067462	0.0837234	0.0483377
ChrI_inter	0.0111638	0.138553	0.00922956		0.0529823	0.0605131	0.0349373
Pol5	0.0371656	0.170622	0.0207205		0.0761692	0.0671245	0.0387544
Pcn1	0.014001	0.137909	0.0115762		0.0544953	0.0589905	0.0340582
Ura4	0.00319446	0.135042	0.0208635		0.0530333	0.0584358	0.0337379
Omh3	0.0319526	0.123564	0.0189518		0.058156	0.0465537	0.0268778
Mpg1	0.0263535	0.155398	0.0143147		0.0653552	0.0638589	0.036869
LTR1	0.0129877	0.136844	0.0121518		0.0539943	0.0585842	0.0338236
LTR2	0.0136108	0.141343	0.00505118		0.0533351	0.0623293	0.0359858
NeoP	0.00405808	0.172372	0.0134534		0.0632945	0.0772248	0.0445858
mAct	0.159108	0.099988	0.0115692		0.0902218	0.0606271	0.0350031
Hoxc8	0.00115433	0.192397	0.0214432		0.0716648	0.0857713	0.0495201
mSat	0.00184619	0.105687	0.0138333		0.0404556	0.0463846	0.0267802
mSat (H3K9me3)	0.0999898	2.15991	1.17731

## Sheet: All Data
	H3K9me3				No antibody
% Sat	Mean	STDEV	SEM		Mean	STDEV	SEM
Rad3	1.51806	0.231156	0.133458		0.0707282	0.0829516	0.0478921
Mac1	1.8795	0.518384	0.299289		0.067462	0.0837234	0.0483377
ChrI_inter	1.1602	0.265281	0.15316		0.0529823	0.0605131	0.0349373
Pol5	1.46412	0.458076	0.26447		0.0761692	0.0671245	0.0387544
Pcn1	1.4341	0.452048	0.26099		0.0544953	0.0589905	0.0340582
Ura4	1.53791	0.42061	0.24284		0.0530333	0.0584358	0.0337379
Omh3	1.48893	0.470469	0.271625		0.058156	0.0465537	0.0268778
Mpg1	1.66077	0.437914	0.25283		0.0653552	0.0638589	0.036869
LTR1	1.30323	0.285105	0.164606		0.0539943	0.0585842	0.0338236
LTR2	1.53537	0.316915	0.182971		0.0533351	0.0623293	0.0359858
NeoP	3.01425	0.30367	0.175324		0.0632945	0.0772248	0.0445858
mAct	0.297897	0.120151	0.0693692		0.0902218	0.0606271	0.0350031
Hoxc8	0.700772	0.318854	0.18409		0.0716648	0.0857713	0.0495201
mSat	1	0	0		0.0404556	0.0463846	0.0267802
