# Supplementary material for: Large domains of heterochromatin direct the formation of short mitotic chromosome loops
Source: eLife. 2020 Sep 11;9:e57212. doi: 10.7554/eLife.57212 (PMC7515631; doi:10.7554/eLife.57212)
Supplement: Figure 6—source data 1. [file elife-57212-fig6-data1.xlsx]

## Sheet: Binned values
	1	FISH	IF	3	FISH	IF	6	FISH	IF	7	FISH	IF	8	FISH	IF	9	FISH	IF	11	FISH	IF	13	FISH	IF	15	FISH	IF	16	FISH	IF	18	FISH	IF	23	FISH	IF	24	FISH	IF	27	FISH	IF	28	FISH	IF
	X	Y	Y	X	Y	Y	X	Y	Y	X	Y	Y	X	Y	Y	X	Y	Y	X	Y	Y	X	Y	Y	X	Y	Y	X	Y	Y	X	Y	Y	X	Y	Y	X	Y	Y	X	Y	Y	X	Y	Y
0	0	8.25	112.5	0	7	62	0	11	104	0	15	100	0	7	124	0	7	73	0	17.375	55.875	0	24	95	0	12	150	0	10	107	0	17	135	0	13	75	0	16	101	0	10.7778	62.5556	0	15	73.5
1	1.16279	8.0775	135.533	1.5873	7	70.6568	1.35135	11.0145	101.803	1.51515	14.5028	119.733	1.40845	7.1754	145.571	1.0989	6.1355	84.4789	1.08696	15.7104	68.5691	1.04167	22.7879	104.924	1.69492	13.8515	163.62	1.16279	9.9838	113.357	1.5873	17.3259	136.599	1.92308	15.5355	91.8492	1.35135	14.615	120.85	1.75439	9.4791	64.2859	1.81818	15.4727	70.8623
2	2.32558	8.5291	155.284	3.1746	6.6106	74.1573	2.7027	11.9122	102.427	3.0303	15.0056	142.684	2.8169	7.2638	155.858	2.1978	6.7263	96.8755	2.17391	16.2949	77.2279	2.08333	21.6363	105.697	3.38983	14.4584	164.51	2.32558	10.3298	117.049	3.1746	17.69	132.579	3.84615	18.7279	105.728	2.7027	13.3957	139.338	3.50877	9.8098	65.6697	3.63636	16.8379	69.397
3	3.48837	9.0608	171.082	4.7619	6.2296	74.6663	4.05405	12.0408	96.1066	4.54545	16.6943	145.342	4.22535	8.6836	157.293	3.2967	7.5869	106.177	3.26087	15.3231	80.8587	3.125	21.3637	98.5236	5.08475	15.1807	161.687	3.48837	9.2053	118.743	4.7619	17.2941	128.601	5.76923	22.4411	115.989	4.05405	13.4981	153.16	5.26316	9.6454	65.2151	5.45455	21.8154	67.7537
4	4.65116	9.6105	179.412	6.34921	6	69.6378	5.40541	10.2389	94.1791	6.06061	17.9606	140.674	5.6338	9.5275	151.898	4.3956	8.5342	109.595	4.34783	15.9008	83.9036	4.16667	21.3029	91.0917	6.77966	14.998	159.431	4.65116	9.7947	118.042	6.34921	19.9031	126.821	7.69231	23.2548	117.652	5.40541	11.1735	157.269	7.01754	9.7401	63.9481	7.27273	25.3792	67.4208
5	5.81395	10	179.889	7.93651	6	66.3486	6.75676	10.8825	90.0544	7.57576	17.1269	130.904	7.04225	11.0165	141.681	5.49451	7.345	109.757	5.43478	16.6904	82.4348	5.20833	21.3335	83.0619	8.47458	13.412	159.345	5.81395	10.3114	117.879	7.93651	19.8752	120.787	9.61538	23.7843	117	6.75676	8.2073	152.228	8.77193	9.7895	62.16	9.09091	27.2541	67.6818
6	6.97674	10.0472	177.244	9.52381	5.7939	65.7786	8.10811	11	84.6832	9.09091	16.8068	118.228	8.4507	10.9475	133.909	6.59341	7.1868	107.438	6.52174	16.1848	78.8414	6.25	20.0456	76.5461	10.1695	14.1544	159.397	6.97674	10.7947	116.779	9.52381	18.584	112.739	11.5385	23.2061	112.92	8.10811	8.2903	145.178	10.5263	9.899	59.2632	10.9091	24.5048	67.1773
7	8.13953	10.9826	169.244	11.1111	5.2952	62.8506	9.45946	11	82.0314	10.6061	17.0027	111.764	9.85915	11.1412	129.794	7.69231	8.025	105.692	7.6087	16.9507	77.2885	7.29167	19.6441	72.8799	11.8644	16.1628	161.857	8.13953	12.435	112.865	11.1111	19.4284	103.354	13.4615	22.9071	107.073	9.45946	7.4104	138.065	12.2807	10.4971	54.6206	12.7273	20.483	64.4846
8	9.30233	11.9796	162.861	12.6984	5.6626	59.0508	10.8108	11	77.2995	12.1212	15.3483	108.482	11.2676	10.9721	126.359	8.79121	8.9023	98.2198	8.69565	18.0005	73.5751	8.33333	19.1515	66.5773	13.5593	18.6749	157.135	9.30233	12.1334	107.316	12.6984	21.6288	96.6971	15.3846	21.0294	102.402	10.8108	9.2862	131.785	14.0351	9.9523	53.5429	14.5455	16.8065	62.9742
9	10.4651	12.4945	158.812	14.2857	6	54.2048	12.1622	10.4024	76.8432	13.6364	17.2707	94.9601	12.6761	10.0585	118.976	9.89011	9	94.751	9.78261	17.2005	67.5906	9.375	19.5453	61.2046	15.2542	23.2263	159.039	10.4651	11.2251	100.962	14.2857	26.3324	87.1647	17.3077	19.0406	98.6097	12.1622	10.3743	124.396	15.7895	9.9015	51.6411	16.3636	15.7455	60.902
10	11.6279	12.4713	159.543	15.873	5.9268	48.3419	13.5135	11.2315	74.9624	15.1515	16.9613	87.1026	14.0845	10.6773	108.248	10.989	8.3553	91.0712	10.8696	16.4477	57.5535	10.4167	19.1967	61.3802	16.9492	25.2453	155.955	11.6279	11.2456	94.3025	15.873	24.8678	83.0436	19.2308	17.9289	92.7157	13.5135	10.3204	117.001	17.5439	10.6668	49.921	18.1818	15.6668	60.6524
11	12.7907	13.7215	160.128	17.4603	6.4499	42.7089	14.8649	11.1091	72.5404	16.6667	16.4574	74.6606	15.493	10.4151	102.912	12.0879	7.7557	87.8436	11.9565	18.4343	52.4223	11.4583	20.7493	58.0839	18.6441	24.6961	158.27	12.7907	11.0243	91.129	17.4603	23.6815	78.5495	21.1538	17.2218	89.8873	14.8649	9.3657	109.154	19.2982	11.0492	49.2472	20	15.44	57.8
12	13.9535	15.8034	155.698	19.0476	6.2793	38.5183	16.2162	11.5842	70.365	18.1818	16	65.1581	16.9014	10.8395	97.6523	13.1868	7.022	86.1565	13.0435	21.5633	45.2769	12.5	21.0913	56.0006	20.339	21.6026	162.1	13.9535	11	90.0789	19.0476	24.7514	82.4476	23.0769	16.9714	82.9268	16.2162	7.5805	102.386	21.0526	11.7959	48.7886	21.8182	16.8455	53.2127
13	15.1163	16.5116	151.146	20.6349	6	36.3355	17.5676	11.0822	66.6439	19.697	16	62.8582	18.3099	12.2428	95.0612	14.2857	7.4875	80.4943	14.1304	24.0401	39.5815	13.5417	21.5531	59.0521	22.0339	21.1648	159.376	15.1163	10.7781	89.9631	20.6349	26.5536	80.9144	25	18.2675	76.0677	17.5676	6.9946	94.5239	22.807	12.2577	49.9411	23.6364	18	53.0663
14	16.2791	14.8014	148.017	22.2222	6.4002	34.5218	18.9189	9.9788	62.3202	21.2121	16.1471	62.6404	19.7183	16.0983	92.914	15.3846	7.1256	78.5049	15.2174	23.8033	37.1564	14.5833	22.7412	57.3498	23.7288	23.7813	152.139	16.2791	10.4682	89.4115	22.2222	25.2986	83.188	26.9231	16.2111	76.4576	18.9189	6.7887	90.9684	24.5614	13.5731	49.6701	25.4545	19.8907	51.4512
15	17.4419	12.8816	145.082	23.8095	6.6898	32.9299	20.2703	9.4856	58.9342	22.7273	17.5147	62.6713	21.1268	19.5383	95.803	16.4835	7.5101	70.7884	16.3043	22.8608	34.6241	15.625	24.3173	57.0441	25.4237	26.6685	142.434	17.4419	10.4868	88.8818	23.8095	24.6633	86.6949	28.8462	18.2971	66.9665	20.2703	7.1298	84.7288	26.3158	14.1936	49.6334	27.2727	24.8192	51.4959
16	18.6047	11.8289	147.788	25.3968	6.7911	31.752	21.6216	9.5793	55.0534	24.2424	16.3988	65.9959	22.5352	19.2884	97.2558	17.5824	7.0293	68.8806	17.3913	25.2755	34.6945	16.6667	27.5442	57.5161	27.1186	32.2956	142.506	18.6047	11.4068	87.8285	25.3968	23.9676	81.4699	30.7692	17.8436	63.5694	21.6216	7.5784	79.2365	28.0702	14.491	50.1987	29.0909	25.8161	54.8864
17	19.7674	10.4709	143.786	26.9841	7.6344	29.549	22.973	10	51.447	25.7576	17.16	70.4496	23.9437	20.1447	98.9646	18.6813	7.5122	66.5836	18.4783	29.0071	37.5273	17.7083	31.7021	54.7527	28.8136	31.2007	137.368	19.7674	12.952	82.6651	26.9841	23.3508	82.0901	32.6923	16.0824	63.8569	22.973	7.7415	75.8699	29.8246	15.3361	50.2401	30.9091	24.4036	54.8812
18	20.9302	10	136.965	28.5714	6.6699	27.5869	24.3243	10.2934	52.0669	27.2727	17.5795	75.2448	25.3521	20.1019	101.138	19.7802	7.5749	66.9525	19.5652	33.9022	35.5047	18.75	34.2268	50.7742	30.5085	27.8427	136.398	20.9302	12.3549	80.8975	28.5714	25.3487	80.1185	34.6154	17.8519	62.0838	24.3243	8.2848	73.988	31.5789	17.2456	51.201	32.7273	22.0682	55.9415
19	22.093	9.6176	125.652	30.1587	6.7657	26.5243	25.6757	10.655	54.1227	28.7879	18.8236	79.7302	26.7606	21.3297	103.993	20.8791	8.4652	67.355	20.6522	35.9999	34.2444	19.7917	36.0587	49.832	32.2034	25.6444	134.774	22.093	12.0581	84.1913	30.1587	23.4021	81.8244	36.5385	17.6977	64.4378	25.6757	8.9729	74	33.3333	17.8519	50.5185	34.5455	18.318	57.5455
20	23.2558	9.593	113.436	31.746	8.1169	26.9431	27.027	11.2826	55.0883	30.303	19.9439	80.4999	28.169	23.7935	104.406	21.978	8.6846	68.4058	21.7391	34.0974	33.9976	20.8333	36.6987	49.5177	33.8983	25.593	130.85	23.2558	13.9559	91.1488	31.746	21.5403	84.2671	38.4615	19.1421	67.3088	27.027	8.0208	76.8116	35.0877	19.7793	51.9729	36.3636	19.5883	57.2577
21	24.4186	10.9477	103.137	33.3333	8.9893	28.131	28.3784	11.6033	57	31.8182	20.1167	80.0698	29.5775	25.4073	106.266	23.0769	8.5444	68.5621	22.8261	27.3953	29.5839	21.875	38.0224	47.6595	35.5932	28.406	128.186	24.4186	14.591	96.0644	33.3333	20.5956	81.1588	40.3846	19.8492	68.6742	28.3784	8.0018	75.9216	36.8421	23.4681	53.3887	38.1818	20.6098	56.6987
22	25.5814	12.2967	98.7509	34.9206	9.1249	29.357	29.7297	11.4485	55.8579	33.3333	19.9177	76.1369	30.9859	24.7569	106.7	24.1758	9.0352	71.0967	23.913	18.384	30.0363	22.9167	37.334	46.0011	37.2881	33.693	131.823	25.5814	15.7532	100.361	34.9206	22.4257	78.8693	42.3077	20.8032	71.1754	29.7297	8.0347	77.3904	38.5965	27.5031	55.4742	40	22.55	57.7375
23	26.7442	13	94	36.5079	10.0243	31.5145	31.0811	11.6519	54.8662	34.8485	19.7672	69.6846	32.3944	21.2792	102.344	25.2747	10.4687	70.806	25	15.4375	31	23.9583	47.1741	46.1509	38.9831	37.6016	135.331	26.7442	16.9944	105.345	36.5079	28.5433	77.1306	44.2308	21.915	74.0128	31.0811	8.6412	79.7464	40.3509	35.2287	57.2585	41.8182	23.4778	55.3035
24	27.907	13.2707	91.1253	38.0952	10.4127	33.6217	32.4324	12.6417	56.1579	36.3636	19.0929	66.9374	33.8028	17.3451	91.6291	26.3736	12.1872	73.6928	26.087	16.9957	33.5499	25	45.276	49.4528	40.678	40.4386	139.061	27.907	18.6733	102.748	38.0952	36.3852	73.0669	46.1538	22.9983	81.5351	32.4324	9.5224	81.5125	42.1053	42.1791	60.4161	43.6364	25.3635	53.9675
25	29.0698	16.7253	87.1381	39.6825	11.6144	33.1114	33.7838	12.9366	57.3009	37.8788	19.9611	62.9861	35.2113	15.006	86.2576	27.4725	14.3998	69.5578	27.1739	14.9457	30.0554	26.0417	39.2239	52.4435	42.3729	39.6532	137.139	29.0698	20.4342	100.498	39.6825	41.8575	70.4121	48.0769	24.8137	72.7223	33.7838	10.3358	83.8259	43.8596	47.4537	64.0835	45.4545	26.8554	56.4607
26	30.2326	16.946	81.8755	41.2698	13.7002	34.1618	35.1351	12.5388	57.7579	39.3939	20.3286	56.4201	36.6197	15.6187	81.7744	28.5714	15.4308	69.8912	28.2609	15.158	29.5816	27.0833	32.611	55.619	44.0678	42.2296	133.909	30.2326	20.3336	96.8925	41.2698	45.3711	70.3096	50	26.6652	68.1924	35.1351	9.2085	78.4339	45.614	49.4383	66.5325	47.2727	30.9769	54.8923
27	31.3953	15.7016	78.0677	42.8571	15.7264	35.2307	36.4865	12.3689	57.4328	40.9091	21.4628	50.5881	38.0282	17.4979	76.7966	29.6703	16.1099	68.4249	29.3478	14.8967	29.712	28.125	29.5816	57.8368	45.7627	45.0969	135.095	31.3953	21.1526	94.2798	42.8571	40.7953	71.4868	51.9231	27.5787	63.8378	36.4865	8.3726	73.2613	47.3684	46.6424	65.5965	49.0909	40.4745	55.0703
28	32.5581	14.9673	77.1658	44.4444	17.3281	33.4113	37.8378	13.8072	56.299	42.4242	21.9822	47.2385	39.4366	19.6199	75.0248	30.7692	15.5385	66.8974	30.4348	14.8544	27.6564	29.1667	33.8993	59.246	47.4576	47.6105	135.701	32.5581	22.5815	95.0517	44.4444	34.6286	68.783	53.8462	30.7882	63.9844	37.8378	8.7809	63.5411	49.1228	50.2923	65.0877	50.9091	56.1877	52.5578
29	33.7209	13.5129	77.7233	46.0317	20.8431	30.5514	39.1892	15.8413	53.6692	43.9394	22.3815	47.7147	40.8451	22.1718	73.1715	31.8681	14.4158	63.9652	31.5217	14.7319	25.9674	30.2083	36.4286	60.3571	49.1525	49.618	132.728	33.7209	24.6268	98.4441	46.0317	28.7369	70.2061	55.7692	33.5012	63.3331	39.1892	9.7118	54.4633	50.8772	64.2739	63.9834	52.7273	70.3668	51.2712
30	34.8837	13.2295	76.8895	47.619	24.1442	29.1994	40.5405	15.427	51.4975	45.4545	23.2373	46.9967	42.2535	25.6259	71.4325	32.967	14.0623	59.3663	32.6087	15.1122	25.2538	31.25	38.7427	60.5986	50.8475	53.7359	130.378	34.8837	27.6462	99.711	47.619	29.295	69.7172	57.6923	35.1088	61.1536	40.5405	9.0625	54.6947	52.6316	76.578	64.2641	54.5455	83.6999	51.7939
31	36.0465	13.1137	75.5963	49.2063	27.5062	30.0481	41.8919	16.6358	49.8911	46.9697	24.4545	46.0511	43.662	28.935	74.0863	34.0659	14.3553	56.1639	33.6957	16.774	23.3379	32.2917	41.8336	56.7877	52.5424	54.3359	130.016	36.0465	29.9222	100.445	49.2063	33.2792	71.8134	59.6154	37.9697	57.1254	41.8919	9.936	59.3611	54.386	84.538	64.2957	56.3636	92.7271	52.6676
32	37.2093	13.4302	73.5738	50.7937	33.6651	30.8895	43.2432	19.2369	48.9641	48.4848	26.5234	46.16	45.0704	33.791	76.1892	35.1648	14.0198	52.4746	34.7826	16.7082	23.8755	33.3333	38.326	54.3551	54.2373	55.1879	128.94	37.2093	28.8632	101.664	50.7937	34.1712	78.6243	61.5385	41.6359	55.1498	43.2432	11.0187	61.9983	56.1404	93.5103	64.5731	58.1818	96.1789	53.3464
33	38.3721	14.7184	72.3334	52.381	40.7002	30.7866	44.5946	18.0479	47.0258	50	29.9101	50.9816	46.4789	40.2296	79.8598	36.2637	12.5055	50.9373	35.8696	17.4368	23.89	34.375	32.769	52.0481	55.9322	59.8119	126.334	38.3721	26.5159	99.7206	52.381	40.3815	86.1984	63.4615	47.9897	54.4482	44.5946	13.0594	66.3933	57.8947	102.524	60.0865	60	102.32	54.23
34	39.5349	13.9993	70.3041	53.9683	48.391	31.667	45.9459	21.6857	48.966	51.5152	34.5589	57.4571	47.8873	44.9458	80.5389	37.3626	11.7973	51.0379	36.9565	17.8215	24.1739	35.4167	31.1381	50.1217	57.6271	65.0344	124.382	39.5349	24.9436	93.8663	53.9683	48.4633	93.5198	65.3846	53.8595	54.7576	45.9459	13.4642	67.8135	59.6491	121.402	54.2157	61.8182	105.459	55.2445
35	40.6977	15.7965	68.9419	55.5556	57.5533	30.387	47.2973	23.931	50.4217	53.0303	39.6181	62.3741	49.2958	49.4444	79.7514	38.4615	13.2235	51.4103	38.0435	17.1413	25.4234	36.4583	28.9024	49.1927	59.322	70.2994	116.594	40.6977	26.8836	92.2259	55.5556	51.7983	97.8633	67.3077	62.8123	55.5972	47.2973	14.6561	68.7128	61.4035	135.512	49.7251	63.6364	107.779	55.0589
36	41.8605	16.1121	69.9313	57.1429	66.2035	31.088	48.6486	26.0989	50.9799	54.5455	47.9758	64.177	50.7042	57.6087	79.0155	39.5604	14.8841	54.8412	39.1304	18.5416	28.104	37.5	28.5933	47.5449	61.0169	81.5594	110.566	41.8605	30.5721	90.3638	57.1429	55.6181	95.8205	69.2308	71.4171	56.4216	48.6486	15.9631	70.7493	63.1579	134.986	46.1373	65.4545	116.46	61.9524
37	43.0233	17.3256	72.204	58.7302	78.7197	30.4719	50	28.6417	52.603	56.0606	54.7479	65.155	52.1127	68.1733	76.4902	40.6593	15.0063	57.7762	40.2174	18.587	28.1531	38.5417	28.8282	49.4047	62.7119	102.934	108.894	43.0233	30.935	93.0547	58.7302	61.8173	93.4011	71.1538	77.232	58.3484	50	18.7313	74.4029	64.9123	118.496	44.1282	67.2727	126.454	65.0955
38	44.186	18.1279	69.9242	60.3175	90.513	29.6241	51.3514	31.4381	48.4691	57.5758	60.9993	65.8269	53.5211	79.0036	72.0977	41.7582	15.909	61.1784	41.3043	19.9941	28.1778	39.5833	27.7227	52.1449	64.4068	127.31	106.666	44.186	27.6852	95.1757	60.3175	71.7864	91.0133	73.0769	82.5683	62.0103	51.3514	20.3208	79.1583	66.6667	100.333	43.6667	69.0909	139.595	65.9373
39	45.3488	19.436	69.007	61.9048	102.705	29.802	52.7027	34.3625	48.8356	59.0909	66.0605	63.4405	54.9296	96.472	73.8424	42.8571	17.5714	60.3265	42.3913	20.7232	28.6852	40.625	27.0211	55.5938	66.1017	137.717	107.188	45.3488	22.3401	95.6698	61.9048	83.0443	84.4048	75	89.2484	67.1681	52.7027	22.7797	82.4969	68.4211	93.9668	43.2982	70.9091	154.733	63.6648
40	46.5116	21.5665	72.2276	63.4921	117.164	31.6987	54.0541	39.1068	51.1765	60.6061	72.3732	65.936	56.338	116.092	73.9357	43.956	20.5897	60.5541	43.4783	22.5662	29.7115	41.6667	25.7901	59.8704	67.7966	137.806	106.739	46.5116	23.264	95.9159	63.4921	96.3145	88.4864	76.9231	100.277	69.6771	54.0541	25.2219	81.2321	70.1754	93.496	43.3525	72.7273	165.182	63.4272
41	47.6744	24.0197	75.1864	65.0794	119.559	33.8235	55.4054	46.1633	54.228	62.1212	76.5862	65.5506	57.7465	129.787	76.9825	45.0549	23.0748	61.2534	44.5652	23	30.5978	42.7083	23.0597	70.968	69.4915	129.798	104.716	47.6744	24.0238	90.7171	65.0794	106.193	86.4495	78.8462	94.9773	72.1739	55.4054	30.9018	76.2867	71.9298	97.9412	44.2342	74.5455	175.668	62.9999
42	48.8372	25.7267	78.3037	66.6667	118.204	38.9682	56.7568	60.587	57.6583	63.6364	81.3834	67.4802	59.1549	144.978	84.7886	46.1538	25.2544	60.1953	45.6522	24.0367	31.4306	43.75	24.2855	70.7142	71.1864	120.628	101.953	48.8372	28.5051	88.1794	66.6667	115.359	86.3997	80.7692	85.6207	73.5152	56.7568	38.7952	67.1495	73.6842	99.5063	44.8095	76.3636	176.282	62.3743
43	50	29.75	77.75	68.254	126.915	39.9759	58.1081	75.333	59.6781	65.1515	85.0065	64.4574	60.5634	156.806	91.3923	47.2527	26.8381	58.7524	46.7391	26.3399	32.0351	44.7917	25.4056	67.9783	72.8814	112.761	99.5525	50	35.005	86.422	68.254	122.152	84.9363	82.6923	80.6775	72.1722	58.1081	46.9028	66.8082	75.4386	99.0205	44.5409	78.1818	171.023	62.0682
44	51.1628	34.6866	77.7611	69.8413	139.82	44.2847	59.4595	92.2498	64.9069	66.6667	92.3378	64.9466	61.9718	162.315	98.6587	48.3516	30.0149	55.3838	47.8261	28.0553	33.4178	45.8333	25.0127	66.883	74.5763	108.295	98.7047	51.1628	42.9102	88.6909	69.8413	137.062	85.207	84.6154	76.8983	69.5597	59.4595	53.8408	66.0143	77.193	90.0893	47.5189	80	154.725	59.6325
45	52.3256	41.6637	76.8532	71.4286	138.423	43.8752	60.8108	109.236	63.1179	68.1818	102.023	68.9368	63.3803	163.484	101.528	49.4505	33.6044	54.673	48.913	31.0509	34.3645	46.875	26.0323	59.8676	76.2712	104.347	100	52.3256	48.3191	90.5317	71.4286	151.052	88.9919	86.5385	68.5521	70.3828	60.8108	67.729	69.183	78.9474	82.9431	50.3632	81.8182	128.599	56.1384
46	53.4884	53.1071	74.5116	73.0159	126.672	42.9346	62.1622	127	61	69.697	117.418	71.5908	64.7887	156.183	102.497	50.5495	38.1503	54.46	50	32.75	32.875	47.9167	25.734	57.9649	77.9661	99.3279	99.5774	53.4884	50.0335	96.2678	73.0159	156.909	92.1624	88.4615	56.3653	67.2265	62.1622	81.5975	75.2547	80.7018	71.4912	51.9401	83.6364	102.555	56.1385
47	54.6512	59.7918	72.078	74.6032	104.7	40.4343	63.5135	142.45	54.5	71.2121	137.234	75.4117	66.1972	152.35	101.2	51.6484	46.4791	54.0365	51.087	34.3517	31.5365	48.9583	26.6804	60.7661	79.661	91.2848	100.248	54.6512	50.6689	104.729	74.6032	162.527	95.4024	90.3846	43.7865	67.6824	63.5135	92.1961	79.3623	82.4561	63.7713	52.8156	85.4545	80.852	58.3671
48	55.814	59.8689	71.4821	76.1905	88.7651	39.7	64.8649	148.3	48.4	72.7273	153.249	79.7113	67.6056	155.35	99	52.7473	57.001	56.5614	52.1739	37.1926	31.0761	50	27.7689	61.2666	81.3559	84.6099	98.5331	55.814	56.8134	113.661	76.1905	168.364	95.7097	92.3077	34.5853	68.1966	64.8649	101.049	84.3948	84.2105	57.494	54.1404	87.2727	82.1881	60.7182
49	56.9767	58.6126	71.0602	77.7778	82.9989	37.9016	66.2162	149.65	43.1	74.2424	164.674	77.0823	69.0141	157	97.2	53.8462	67.4615	58.8711	53.2609	40.477	28.9728	51.0417	28.7722	62.0528	83.0508	77.3345	100.118	56.9767	64.645	118.465	77.7778	171.535	98.8235	94.2308	29.6196	69.8529	66.2162	114.036	86.4256	85.9649	60.1302	53.3481	89.0909	82.6773	61.1703
50	58.1395	59.1649	73.9038	79.3651	77.0942	37.0271	67.5676	146.1	42.95	75.7576	158.146	76.0298	70.4225	155.2	95.45	54.9451	77.3247	62.5596	54.3478	48.8494	28.633	52.0833	29	62.9418	84.7458	72.9587	101.938	58.1395	74.859	121.271	79.3651	163.3	98.2865	96.1538	24.447	72.7946	67.5676	132.273	81.3957	87.7193	65.7304	53.1407	90.9091	78.0455	59.4675
51	59.3023	69.1594	77.7582	80.9524	74.6891	38.7404	68.9189	140.75	45.95	77.2727	134.716	77.4601	71.831	148.5	94.65	56.044	92.0659	62.7114	55.4348	59.7971	29.492	53.125	30.1827	59.5354	86.4407	71.1352	105.904	59.3023	91.9917	124.637	80.9524	137.24	101.242	98.0769	22.0719	78.408	68.9189	145.529	84.6333	89.4737	72.5657	52.4254	92.7273	62.7729	56.103
52	60.4651	85.4265	80.8837	82.5397	73.9861	39.7098	70.2703	130.55	51.55	78.7879	100.958	71.8909	73.2394	132.2	92.55	57.1429	110.381	64.5011	56.5217	78.2027	28.0425	54.1667	31.0357	55.2212	88.1356	71.6183	103.546	60.4651	108.801	126.474	82.5397	107.188	100.891	100	20.8993	83.3818	70.2703	188.233	81.2392	91.2281	73.973	51.7332	94.5455	50.7717	55.0622
53	61.6279	117.023	84.5866	84.127	68.057	41.3106	71.6216	114.3	55.95	80.303	75.2095	67.0711	74.6479	108.2	89.3	58.2418	134.944	63.4595	57.6087	110.41	29.8253	55.2083	33.7112	50.6922	89.8305	68.8	102.72	61.6279	110.851	128.868	84.127	88.6723	103.059				71.6216	234.826	81.8555	92.9825	63.9271	49.1994	96.3636	41.7186	52.0265
54	62.7907	145.286	88.5361	85.7143	58.2998	41.3548	72.973	94.35	57.65	81.8182	62.1194	63.5178	76.0563	87.35	84.2	59.3407	158.018	63.4213	58.6957	140.906	32.2036	56.25	34.2213	49.7666	91.5254	64.44	98.16	62.7907	106.31	123.01	85.7143	73.738	96.8137				72.973	252.398	84.8616	94.7368	51.4761	45.5479	98.1818	34.3268	49.2581
55	63.9535	156.216	93.4974	87.3016	47.8404	40.6287	74.3243	76.6	55.4	83.3333	52.8395	60.7967	77.4648	73.95	80.65	60.4396	181.472	61.6628	59.7826	180.321	35.1498	57.2917	34.6414	47.7354	93.2203	60.44	90.88	63.9535	112.79	119.752	87.3016	61.9056	92.7792				74.3243	233.386	84.338	96.4912	37.9917	41.0443	100	29.5	46.5
56	65.1163	151.98	97.7937	88.8889	38.4498	38.4309	75.6757	61.9	52.05	84.8485	48.6538	60.8235	78.8732	64.95	77.65	61.5385	201.082	61.1486	60.8696	217.346	39.0116	58.3333	38.5495	47.0299	94.9153	57.08	86.08	65.1163	118.182	113.838	88.8889	49.8364	93.7227				75.6757	188.229	86.8313	98.2456	28.7384	36.3727
57	66.2791	155.852	98.8837	90.4762	34.8648	38.8759	77.027	51.15	47.1	86.3636	45.693	64.1585	80.2817	54.6	75.55	62.6374	206.033	61.381	61.9565	240.798	39.3022	59.375	49.0673	50.1244	96.6102	52.8	81.8	66.2791	109.926	108.09	90.4762	41.6571	91.2241				77.027	147.182	90.9678	100	23.6667	32.3333
58	67.4419	167.83	97.4193	92.0635	30.3967	39.6077	78.3784	41.5	44.35	87.8788	41.3883	67.691	81.6901	44.85	75	63.7363	193.862	63.5089	63.0435	234.018	40.1581	60.4167	56.3509	50.1315	98.3051	49.08	74.24	67.4419	95.8456	110.828	92.0635	38.0942	91.1008				78.3784	128.784	86.1713
59	68.6047	165.835	93.9866	93.6508	27.0856	39.4623	79.7297	36.05	44	89.3939	36.9407	70.0311	83.0986	38.4741	78.9341	64.8352	160.056	68.0491	64.1304	207.123	37.5361	61.4583	69.5009	51.5234	100	42.88	69.08	68.6047	121.464	115.049	93.6508	33.1701	91.9693				79.7297	117.384	81.1078
60	69.7674	153.65	88.0105	95.2381	24.7043	39.651	81.0811	32.4	45.3	90.9091	32.8235	73.8356	84.507	34.6175	87.3938	65.9341	122.472	68.0584	65.2174	177.394	35.3048	62.5	90.5467	54.8703				69.7674	157.401	115.383	95.2381	31.0726	90.2558				81.0811	107.079	76.0265
61	70.9302	135.668	81.9448	96.8254	21.4254	40.7596	82.4324	29.05	47.3	92.4242	31.1169	74.6362	85.9155	31.27	87.4299	67.033	102.398	67.5837	66.3043	168.581	29.9441	63.5417	115.27	55.645				70.9302	170.406	112.895	96.8254	27.7221	84.4369				82.4324	96.6308	76.9337
62	72.093	118.733	80.2614	98.4127	19.2884	40.5206	83.7838	28	51.25	93.9394	29.8135	77.3289	87.3239	31.7544	87.4743	68.1319	93.6027	65.7856	67.3913	166.042	27.2644	64.5833	134.798	56.5352				72.093	155.823	110.82	98.4127	26.0097	80.4287				83.7838	77.6283	80.8797
63	73.2558	109.961	74.9039	100	18.3863	37.7372	85.1351	25.4	56.9	95.4545	26.9818	79.1816	88.7324	29.4325	84.6738	69.2308	92.2071	63.1065	68.4783	162.565	28.9366	65.625	141.942	56.2688				73.2558	114.538	105.026	100	25.4568	78.9471				85.1351	62.4408	85.1308
64	74.4186	111.871	77.1507				86.4865	22.7	59.65	96.9697	25.3913	76.097	90.1408	26.4538	83.2687	70.3297	99.0513	59.3259	69.5652	153.658	25.4468	66.6667	123.73	55.0907				74.4186	77.4191	100.486							86.4865	49.4851	89.9337
65	75.5814	108.633	78.9113				87.8378	20.7	58.05	98.4848	26.3973	77.887	91.5493	22.6142	82.743	71.4286	95.2132	57.8163	70.6522	155.576	25.0924	67.7083	96.166	52.8031				75.5814	54.5097	100.355							87.8378	41.6613	91.8809
66	76.7442	97.8504	81.2273				89.1892	20.0509	56.2332	100	32.5836	76.4002	92.9577	20	84.389	72.5275	80.2111	57.5474	71.7391	159.975	26.9674	68.75	77.7322	49.6701				76.7442	42.8382	104.839							89.1892	37.4588	87.1143
67	77.907	83.1628	83.7017				90.5405	17.965	55.9935				94.3662	19.7465	85.0166	73.6264	57.6703	57.4033	72.8261	155.895	27.6033	69.7917	70.736	48.1215				77.907	35.9971	105.741							90.5405	34.3519	87.0317
68	79.0698	69.6597	82.2412				91.8919	16.2131	55.7413				95.7746	18	87.2848	74.7253	42.9502	60.6278	73.913	138.286	26.8086	70.8333	69.9268	48.3919				79.0698	31.8452	107.941							91.8919	31.3587	85.6947
69	80.2326	62.6067	82.2553				93.2432	15.3391	57.9095				97.1831	18	88.8955	75.8242	35.2313	60.0449	75	121.406	25.8125	71.875	74.3744	49.3174				80.2326	27.1205	105.504							93.2432	27.2969	83.0164
70	81.3953	55.7097	76.9039				94.5946	13.9188	62.2169				98.5915	18.4596	87.4129	76.9231	29.6266	59.261	76.087	120.57	29.1293	72.9167	76.8495	48.2561				81.3953	24.7226	108.328							94.5946	22.3775	82.1645
71	82.5581	50.4847	74.4558				95.9459	13.6219	66.4484				100	17.2724	80.4891	78.022	24.7924	59.5909	77.1739	133.174	31.7105	73.9583	81.619	46.9774				82.5581	25.643	108.609							95.9459	19.2536	83.4358
72	83.7209	47.7153	74.2713				97.2973	12.7754	68.2773							79.1209	22.2066	60.2571	78.2609	141.407	33.4995	75	88.2868	48.1118				83.7209	24.7592	111.792							97.2973	17.1174	80.4997
73	84.8837	41.3488	72.7036				98.6486	11.2064	66.7366							80.2198	19.0655	59.1011	79.3478	140.384	34.3098	76.0417	83.8627	48.9735				84.8837	23.7881	116.467							98.6486	16.078	79.6401
74	86.0465	38.0904	76.2692				100	10.0663	63.1961							81.3187	17.8764	59.7244	80.4348	127.32	38.1017	77.0833	70.5081	52.4766				86.0465	22.8394	119.456							100	14.3523	77.9956
75	87.2093	35.1499	78.5331													82.4176	14.5398	61.7569	81.5217	116.918	40.7192	78.125	61.6398	59.2499				87.2093	19.9452	121.045
76	88.3721	32.6395	79.284													83.5165	12.6981	63.0927	82.6087	106.596	41.491	79.1667	57.9969	62.8218				88.3721	18.7292	122.974
77	89.5349	28.7133	81.5065													84.6154	12.1591	60.9329	83.6957	93.2346	41.2529	80.2083	55.0704	63.8066				89.5349	15.4604	126.423
78	90.6977	25.8372	86.5989													85.7143	11.5306	59.0612	84.7826	75.8043	42.0305	81.25	53.2919	68.0253				90.6977	13.6589	123.67
79	91.8605	24.4943	84.0581													86.8132	12.482	57.7043	85.8696	60.2924	41.915	82.2917	50.2322	74.3758				91.8605	13.7188	126.739
80	93.0233	23.1651	84.907													87.9121	13.4385	59.2161	86.9565	58.0326	40.931	83.3333	49.0793	80.6771				93.0233	13.4376	131.711
81	94.186	21.6894	81.9966													89.011	13.9308	58.9231	88.0435	56.6196	41.8989	84.375	44.8842	76.506				94.186	12.5939	135.842
82	95.3488	21.034	80.4419													90.1099	12.3174	57.8974	89.1304	46.9903	41.2717	85.4167	40.9227	75.7263				95.3488	12	131.292
83	96.5116	19.5403	79.707													91.2088	8.9646	60.4835	90.2174	35.7808	38.8261	86.4583	39.2496	75.3827				96.5116	11.7843	124.047
84	97.6744	17.757	79.964													92.3077	7.7337	59.9823	91.3043	33.4669	36.4825	87.5	35.8946	72.8967				97.6744	11.6637	111.415
85	98.8372	16.0756	81.6783													93.4066	6.8612	58.9996	92.3913	35.0255	39.0163	88.5417	32.3715	71.4197				98.8372	11.8742	103.025
86	100	16	79.375													94.5055	5.7641	57.6322	93.4783	36.7046	37.9981	89.5833	31.6603	74.3658				100	11.5649	92.6801
87																95.6044	5	58.4222	94.5652	38.1344	37.1949	90.625	27.836	69.2545
88																96.7033	4.9385	62.63	95.6522	29.5784	39.6127	91.6667	27.0807	68.6469
89																97.8022	4.3783	62.0856	96.7391	25.6455	41.7512	92.7083	26.097	74.3348
90																98.9011	4.9674	64.9106	97.8261	21.9898	43.0754	93.75	24.9595	77.8123
91																100	4.2222	62.2222	98.913	20.2997	43.038	94.7917	23.0548	77.4504
92																			100	20.25	40.25	95.8333	22.8324	78.2237
93																						96.875	23.0793	80.4854
94																						97.9167	21.9645	75.2573
95																						98.9583	19.9358	72.6399
96																						100	19.4506	66.0219
97
98
99
100
101
102
103
104
105
106
107
108
109
110
111
112
113
114
115
116
117
118
119
120
121
122
123
124
125
126
127
128
129
130
131
132
133
134
135
136
137
138
139
140
141
142
143
144
145
146
147
148
149
150
151
152
153
154
155
156
157
158
159
160
161
162
163
164
165
166
167
168
169
170
171
172
173
174
175
176
177
178
179
180
181
182
183
184
185
186
187
188
189
190
191
192
193
194
195
196
197
198
199
200
201
202
203
204
205
206
207
208
209
210
211
212
213
214
215
216
217
218
219
220
221
222
223
224
225
226
227
228
229
230
231
232
233
234
235
236
237
238
239
240
241
242
243
244
245
246
247
248
249
250
251
252
253
254
255
256
257
258
259
260
261
262
263
264
265
266
267
268
269
270
271
272
273
274
275
276
277
278
279
280
281
282
	0			0			0			0			0			0			0			0			0			0			0			0			0			0			0					Mean	STDDEV
	5	8.70558	150.762	5	6.71005	70.3701	5	11.4919	101.084	5	15.3007	126.94	5	7.5307	145.681	5	7.19658	94.0252	5	16.1208	73.2869	5	22.2182	99.0473	5	13.4366	159.377	5	9.86272	114.838	5	17.3275	133.195	5	15.7545	90.859	5	14.3772	128.587	5	10.0222	64.1704	5	15.7702	71.2531		FISH	12.7884	4.30499
	10	10.7523	172.309	10	5.9313	67.255	10	10.7804	87.737	10	17.2981	129.935	10	10.6582	139.321	10	8.09182	103.171	10	17.0054	75.9461	10	19.944	72.054	10	14.5302	160.154	10	11.4186	113.71	10	19.4541	120.115	10	23.1601	116.88	10	8.77038	148.185	10	9.725	63.7744	10	24.8162	67.6188			14.1557	5.59871
	15	13.6227	158.545	15	5.6526	58.7021	15	10.9357	75.4114	15	16.5406	105.069	15	10.5693	117.861	15	7.65513	86.3914	15	20.1213	48.7086	15	21.0663	58.3733	15	16.3307	159.463	15	11.1238	94.118	15	22.4632	95.7386	15	23.0566	109.996	15	9.83665	120.584	15	10.1161	55.8089	15	20.5981	64.8787			14.6459	5.55064
	20	13.2989	147.164	20	6.21867	43.1897	20	10.8817	66.443	20	16.3547	72.4449	20	12.3989	97.1349	20	7.35042	70.342	20	26.9698	35.9014	20	30.7698	53.9838	20	24.3892	157.755	20	11.2184	87.75	20	24.4336	81.3469	20	19.333	97.9091	20	7.12127	95.9594	20	10.5392	50.2698	20	15.6174	59.7848			15.793	7.47972
	25	10.0396	119.797	25	6.36333	34.5957	25	9.83957	54.3754	25	16.6869	63.7692	25	19.6571	97.3411	25	8.68235	68.8549	25	26.2628	31.7724	25	40.901	47.7564	25	22.1829	157.872	25	13.24	88.0755	25	25.5052	83.5991	25	17.4869	82.9606	25	7.68363	78.4558	25	12.5422	49.4666	25	16.7618	54.693			16.9224	8.81842
	30	13.8232	92.7536	30	7.0318	29.6293	30	11.2474	55.5172	30	17.8544	75.1415	30	22.6581	103.951	30	13.7193	70.4745	30	15.4867	30.7798	30	36.1184	54.9196	30	30.0549	140.769	30	17.9638	102.238	30	24.2224	81.2262	30	17.5919	73.1639	30	8.25755	76.0309	30	14.6736	50.0241	30	23.5087	52.6112			18.2808	7.64779
	35	14.8715	78.3444	35	8.2492	27.7388	35	12.4101	56.1083	35	19.9364	76.5978	35	21.1271	100.224	35	14.593	61.5982	35	15.6361	25.2182	35	37.62	56.8293	35	26.36	134.007	35	23.2681	96.8758	35	21.9909	81.5299	35	17.2593	63.17	35	9.4998	81.6949	35	17.5487	50.8598	35	21.5966	56.1227			18.7978	7.03205
	40	13.8154	72.9519	40	10.6838	32.7492	40	13.6391	56.2897	40	19.7942	62.1145	40	16.9356	79.9633	40	13.286	52.1403	40	17.7353	25.3978	40	29.0369	49.6818	40	33.2335	131.78	40	27.5612	98.924	40	35.5953	73.5365	40	18.4199	65.8733	40	9.01845	67.4249	40	23.5835	53.6119	40	20.916	57.2313			20.217	7.82469
	45	16.8405	70.2503	45	15.5849	34.2679	45	17.3369	49.3446	45	21.9422	48.5138	45	25.5776	72.8968	45	17.2691	59.9588	45	20.9741	29.0651	45	25.1124	65.0249	45	40.7738	136.703	45	29.019	92.705	45	40.265	70.1931	45	20.8558	71.2875	45	10.7691	60.6119	45	41.6205	60.586	45	23.7971	55.6695			24.5159	9.27888
	50	24.0998	74.4949	50	24.1645	29.933	50	25.0893	50.7426	50	26.0313	47.5473	50	42.1027	79.0848	50	27.7573	58.0516	50	28.4466	32.8246	50	26.2457	61.3496	50	47.4418	134.508	50	26.6276	91.3808	50	30.437	70.5789	50	24.8257	74.1499	50	15.7037	70.4196	50	48.791	65.7389	50	32.7689	55.4744			30.0355	8.88606
	55	43.7998	75.7908	55	40.9188	31.1144	55	33.3873	50.2711	55	38.0157	58.7475	55	75.3144	75.3614	55	57.2833	57.2977	55	38.7241	30.6187	55	29.3519	60.2036	55	54.4199	129.778	55	45.3873	93.3283	55	41.0053	86.1142	55	28.344	65.3382	55	21.7634	79.3225	55	75.13	64.1811	55	70.0848	51.8743			46.1953	16.317
	60	61.7015	73.5511	60	67.4922	30.649	60	68.5833	59.1178	60	60.6026	64.8075	60	130.286	78.5689	60	123.852	63.5233	60	113.927	30.9426	60	38.0381	49.0697	60	65.0486	122.437	60	72.0773	119.509	60	56.4112	95.695	60	35.5266	60.5374	60	42.6102	69.0647	60	105.812	59.6251	60	97.0753	53.4147			75.9363	29.766
	65	125.988	86.876	65	103.461	30.3749	65	131.746	56.7545	65	76.7809	66.3223	65	159.697	98.5188	65	188.501	63.1501	65	224.821	39.002	65	93.2931	53.7411	65	103.935	108.708	65	109.688	124.526	65	83.7151	87.9682	65	44.8128	54.799	65	85.643	77.0487	65	129.665	46.6635	65	105.186	54.8445			117.795	43.999
	70	159.029	95.2188	70	126.125	39.2631	70	145.5	44	70	99.1964	67.4829	70	154.9	99.1333	70	102.67	66.1335	70	165.648	29.3793	70	102.061	52.3908	70	135.107	106.214	70	120.564	112.638	70	120.191	85.7481	70	62.6963	55.5921	70	130.613	84.1515	70	97.15	43.4825	70	127.503	64.3284			123.264	26.5974
	75	119.058	78.5652	75	123.265	42.4147	75	103.95	55.1375	75	151.719	77.4018	75	136.025	92.9875	75	75.0192	58.5441	75	146.228	26.4568	75	78.2113	48.2109	75	113.895	100.07	75	129.547	107.307	75	156.829	92.1856	75	83.0162	62.5089	75	227.211	83.0736	75	96.9812	44.1321	75	165.195	63.364			127.077	38.4339
	80	89.8266	81.5204	80	82.9527	38.2096	80	47.65	46.875	80	131.273	75.1269	80	75.4167	80.8333	80	27.9642	59.7885	80	131.388	30.8923	80	72.4589	54.3267	80	98.32	99.9419	80	41.2976	104.719	80	167.733	97.6066	80	94.8341	69.673	80	145.395	86.2696	80	90.6843	47.4743	80	167.343	61.3583			97.6359	41.8823
	85	51.573	76.118	85	72.2441	39.9203	85	29.8167	47.95	85	59.7056	63.0523	85	43.1354	79.2195	85	15.2678	60.9216	85	103.974	40.7191	85	50.5116	72.6782	85	78.301	100.197	85	25.2067	110.14	85	111.033	101.731	85	81.0655	71.749	85	93.7792	77.9466	85	64.2522	52.9654	85	128.627	57.3031			67.2329	31.7478
	90	33.6483	78.8982	90	48.1967	40.1381	90	22.2127	57.7083	90	41.3407	67.2935	90	30.819	86.526	90	12.8455	58.7262	90	55.4837	41.5042	90	36.0197	73.9582	90	70.5178	104.057	90	19.2435	122.474	90	61.8267	94.4385	90	62.4587	68.8047	90	47.7615	88.5149	90	66.1421	52.9714	90	81.9058	60.0852			46.0282	19.6648
	95	23.7965	84.3901	95	30.7824	39.3153	95	15.859	57.9653	95	31.2513	75.2669	95	22.2036	83.8543	95	8.3282	58.999	95	35.8224	37.9036	95	25.8056	73.4998	95	60.6533	91.7067	95	13.3523	129.491	95	37.6405	91.4314	95	35.9971	68.5773	95	28.8462	84.4768	95	63.1254	48.8268	95	63.8634	56.8776			33.1552	16.7923
	100	18.0814	80.2332	100	20.9511	39.6671	100	11.9175	66.1646	100	27.8385	77.3914	100	17.933	86.0206	100	4.70128	62.0541	100	23.5527	41.5455	100	21.4525	74.5256	100	48.2533	75.04	100	11.7774	112.492	100	27.5653	83.5171	100	22.4727	78.1948	100	16.7003	80.3928	100	30.1323	36.5834	100	35.1818	49.2615			22.5674	10.1941
[truncated: 5 more columns]

## Sheet: IF Normalised
	0			0			0			0			0			0			0			0			0			0			0			0			0			0			0
	5	8.70558	150.762	5	6.71005	70.3701	5	11.4919	101.084	5	15.3007	126.94	5	7.5307	145.681	5	7.19658	94.0252	5	16.1208	73.2869	5	22.2182	99.0473	5	13.4366	159.377	5	9.86272	114.838	5	17.3275	133.195	5	15.7545	90.859	5	14.3772	128.587	5	10.0222	64.1704	5	15.7702	71.2531
	10	10.7523	172.309	10	5.9313	67.255	10	10.7804	87.737	10	17.2981	129.935	10	10.6582	139.321	10	8.09182	103.171	10	17.0054	75.9461	10	19.944	72.054	10	14.5302	160.154	10	11.4186	113.71	10	19.4541	120.115	10	23.1601	116.88	10	8.77038	148.185	10	9.725	63.7744	10	24.8162	67.6188
	15	13.6227	158.545	15	5.6526	58.7021	15	10.9357	75.4114	15	16.5406	105.069	15	10.5693	117.861	15	7.65513	86.3914	15	20.1213	48.7086	15	21.0663	58.3733	15	16.3307	159.463	15	11.1238	94.118	15	22.4632	95.7386	15	23.0566	109.996	15	9.83665	120.584	15	10.1161	55.8089	15	20.5981	64.8787
	20	13.2989	147.164	20	6.21867	43.1897	20	10.8817	66.443	20	16.3547	72.4449	20	12.3989	97.1349	20	7.35042	70.342	20	26.9698	35.9014	20	30.7698	53.9838	20	24.3892	157.755	20	11.2184	87.75	20	24.4336	81.3469	20	19.333	97.9091	20	7.12127	95.9594	20	10.5392	50.2698	20	15.6174	59.7848
	25	10.0396	119.797	25	6.36333	34.5957	25	9.83957	54.3754	25	16.6869	63.7692	25	19.6571	97.3411	25	8.68235	68.8549	25	26.2628	31.7724	25	40.901	47.7564	25	22.1829	157.872	25	13.24	88.0755	25	25.5052	83.5991	25	17.4869	82.9606	25	7.68363	78.4558	25	12.5422	49.4666	25	16.7618	54.693
	30	13.8232	92.7536	30	7.0318	29.6293	30	11.2474	55.5172	30	17.8544	75.1415	30	22.6581	103.951	30	13.7193	70.4745	30	15.4867	30.7798	30	36.1184	54.9196	30	30.0549	140.769	30	17.9638	102.238	30	24.2224	81.2262	30	17.5919	73.1639	30	8.25755	76.0309	30	14.6736	50.0241	30	23.5087	52.6112
	35	14.8715	78.3444	35	8.2492	27.7388	35	12.4101	56.1083	35	19.9364	76.5978	35	21.1271	100.224	35	14.593	61.5982	35	15.6361	25.2182	35	37.62	56.8293	35	26.36	134.007	35	23.2681	96.8758	35	21.9909	81.5299	35	17.2593	63.17	35	9.4998	81.6949	35	17.5487	50.8598	35	21.5966	56.1227
	40	13.8154	72.9519	40	10.6838	32.7492	40	13.6391	56.2897	40	19.7942	62.1145	40	16.9356	79.9633	40	13.286	52.1403	40	17.7353	25.3978	40	29.0369	49.6818	40	33.2335	131.78	40	27.5612	98.924	40	35.5953	73.5365	40	18.4199	65.8733	40	9.01845	67.4249	40	23.5835	53.6119	40	20.916	57.2313
	45	16.8405	70.2503	45	15.5849	34.2679	45	17.3369	49.3446	45	21.9422	48.5138	45	25.5776	72.8968	45	17.2691	59.9588	45	20.9741	29.0651	45	25.1124	65.0249	45	40.7738	136.703	45	29.019	92.705	45	40.265	70.1931	45	20.8558	71.2875	45	10.7691	60.6119	45	41.6205	60.586	45	23.7971	55.6695
	50	24.0998	74.4949	50	24.1645	29.933	50	25.0893	50.7426	50	26.0313	47.5473	50	42.1027	79.0848	50	27.7573	58.0516	50	28.4466	32.8246	50	26.2457	61.3496	50	47.4418	134.508	50	26.6276	91.3808	50	30.437	70.5789	50	24.8257	74.1499	50	15.7037	70.4196	50	48.791	65.7389	50	32.7689	55.4744
	55	43.7998	75.7908	55	40.9188	31.1144	55	33.3873	50.2711	55	38.0157	58.7475	55	75.3144	75.3614	55	57.2833	57.2977	55	38.7241	30.6187	55	29.3519	60.2036	55	54.4199	129.778	55	45.3873	93.3283	55	41.0053	86.1142	55	28.344	65.3382	55	21.7634	79.3225	55	75.13	64.1811	55	70.0848	51.8743
	60	61.7015	73.5511	60	67.4922	30.649	60	68.5833	59.1178	60	60.6026	64.8075	60	130.286	78.5689	60	123.852	63.5233	60	113.927	30.9426	60	38.0381	49.0697	60	65.0486	122.437	60	72.0773	119.509	60	56.4112	95.695	60	35.5266	60.5374	60	42.6102	69.0647	60	105.812	59.6251	60	97.0753	53.4147
	65	125.988	86.876	65	103.461	30.3749	65	131.746	56.7545	65	76.7809	66.3223	65	159.697	98.5188	65	188.501	63.1501	65	224.821	39.002	65	93.2931	53.7411	65	103.935	108.708	65	109.688	124.526	65	83.7151	87.9682	65	44.8128	54.799	65	85.643	77.0487	65	129.665	46.6635	65	105.186	54.8445
	70	159.029	95.2188	70	126.125	39.2631	70	145.5	44	70	99.1964	67.4829	70	154.9	99.1333	70	102.67	66.1335	70	165.648	29.3793	70	102.061	52.3908	70	135.107	106.214	70	120.564	112.638	70	120.191	85.7481	70	62.6963	55.5921	70	130.613	84.1515	70	97.15	43.4825	70	127.503	64.3284
	75	119.058	78.5652	75	123.265	42.4147	75	103.95	55.1375	75	151.719	77.4018	75	136.025	92.9875	75	75.0192	58.5441	75	146.228	26.4568	75	78.2113	48.2109	75	113.895	100.07	75	129.547	107.307	75	156.829	92.1856	75	83.0162	62.5089	75	227.211	83.0736	75	96.9812	44.1321	75	165.195	63.364
	80	89.8266	81.5204	80	82.9527	38.2096	80	47.65	46.875	80	131.273	75.1269	80	75.4167	80.8333	80	27.9642	59.7885	80	131.388	30.8923	80	72.4589	54.3267	80	98.32	99.9419	80	41.2976	104.719	80	167.733	97.6066	80	94.8341	69.673	80	145.395	86.2696	80	90.6843	47.4743	80	167.343	61.3583
	85	51.573	76.118	85	72.2441	39.9203	85	29.8167	47.95	85	59.7056	63.0523	85	43.1354	79.2195	85	15.2678	60.9216	85	103.974	40.7191	85	50.5116	72.6782	85	78.301	100.197	85	25.2067	110.14	85	111.033	101.731	85	81.0655	71.749	85	93.7792	77.9466	85	64.2522	52.9654	85	128.627	57.3031
	90	33.6483	78.8982	90	48.1967	40.1381	90	22.2127	57.7083	90	41.3407	67.2935	90	30.819	86.526	90	12.8455	58.7262	90	55.4837	41.5042	90	36.0197	73.9582	90	70.5178	104.057	90	19.2435	122.474	90	61.8267	94.4385	90	62.4587	68.8047	90	47.7615	88.5149	90	66.1421	52.9714	90	81.9058	60.0852
	95	23.7965	84.3901	95	30.7824	39.3153	95	15.859	57.9653	95	31.2513	75.2669	95	22.2036	83.8543	95	8.3282	58.999	95	35.8224	37.9036	95	25.8056	73.4998	95	60.6533	91.7067	95	13.3523	129.491	95	37.6405	91.4314	95	35.9971	68.5773	95	28.8462	84.4768	95	63.1254	48.8268	95	63.8634	56.8776
	100	18.0814	80.2332	100	20.9511	39.6671	100	11.9175	66.1646	100	27.8385	77.3914	100	17.933	86.0206	100	4.70128	62.0541	100	23.5527	41.5455	100	21.4525	74.5256	100	48.2533	75.04	100	11.7774	112.492	100	27.5653	83.5171	100	22.4727	78.1948	100	16.7003	80.3928	100	30.1323	36.5834	100	35.1818	49.2615
	0			0			0			0			0			0			0			0			0			0			0			0			0			0			0					Mean	STDDEV
	5	8.70558	1	5	6.71005	1	5	11.4919	1	5	15.3007	1	5	7.5307	1	5	7.19658	1	5	16.1208	1	5	22.2182	1	5	13.4366	1	5	9.86272	1	5	17.3275	1	5	15.7545	1	5	14.3772	1	5	10.0222	1	5	15.7702	1		FISH	12.7884	4.30499
	10	10.7523	1.14292	10	5.9313	0.955733	10	10.7804	0.867961	10	17.2981	1.0236	10	10.6582	0.956344	10	8.09182	1.09727	10	17.0054	1.03629	10	19.944	0.727471	10	14.5302	1.00488	10	11.4186	0.990174	10	19.4541	0.901804	10	23.1601	1.28639	10	8.77038	1.15241	10	9.725	0.993829	10	24.8162	0.948994			14.1557	5.59871
	15	13.6227	1.05162	15	5.6526	0.83419	15	10.9357	0.746026	15	16.5406	0.827706	15	10.5693	0.809036	15	7.65513	0.918811	15	20.1213	0.664629	15	21.0663	0.589348	15	16.3307	1.00054	15	11.1238	0.81957	15	22.4632	0.718787	15	23.0566	1.21063	15	9.83665	0.937763	15	10.1161	0.869698	15	20.5981	0.910539			14.6459	5.55064
	20	13.2989	0.976129	20	6.21867	0.613751	20	10.8817	0.657304	20	16.3547	0.570704	20	12.3989	0.666766	20	7.35042	0.748119	20	26.9698	0.489875	20	30.7698	0.545031	20	24.3892	0.989824	20	11.2184	0.764118	20	24.4336	0.610737	20	19.333	1.07759	20	7.12127	0.746261	20	10.5392	0.783379	20	15.6174	0.839048			15.793	7.47972
	25	10.0396	0.79461	25	6.36333	0.491625	25	9.83957	0.537922	25	16.6869	0.502359	25	19.6571	0.668182	25	8.68235	0.732303	25	26.2628	0.433535	25	40.901	0.482158	25	22.1829	0.990559	25	13.24	0.766952	25	25.5052	0.627646	25	17.4869	0.913069	25	7.68363	0.610138	25	12.5422	0.770863	25	16.7618	0.767588			16.9224	8.81842
	30	13.8232	0.61523	30	7.0318	0.42105	30	11.2474	0.549218	30	17.8544	0.591947	30	22.6581	0.713551	30	13.7193	0.749528	30	15.4867	0.41999	30	36.1184	0.554479	30	30.0549	0.883249	30	17.9638	0.890278	30	24.2224	0.60983	30	17.5919	0.805247	30	8.25755	0.59128	30	14.6736	0.77955	30	23.5087	0.73837			18.2808	7.64779
	35	14.8715	0.519655	35	8.2492	0.394185	35	12.4101	0.555066	35	19.9364	0.603419	35	21.1271	0.687973	35	14.593	0.655124	35	15.6361	0.344103	35	37.62	0.57376	35	26.36	0.840821	35	23.2681	0.843584	35	21.9909	0.612111	35	17.2593	0.695253	35	9.4998	0.635329	35	17.5487	0.792573	35	21.5966	0.787653			18.7978	7.03205
	40	13.8154	0.483887	40	10.6838	0.465385	40	13.6391	0.55686	40	19.7942	0.489324	40	16.9356	0.548895	40	13.286	0.554535	40	17.7353	0.346554	40	29.0369	0.501597	40	33.2335	0.826847	40	27.5612	0.86142	40	35.5953	0.552098	40	18.4199	0.725006	40	9.01845	0.524353	40	23.5835	0.835462	40	20.916	0.803211			20.217	7.82469
	45	16.8405	0.465968	45	15.5849	0.486967	45	17.3369	0.488154	45	21.9422	0.38218	45	25.5776	0.500388	45	17.2691	0.637689	45	20.9741	0.396593	45	25.1124	0.656504	45	40.7738	0.857736	45	29.019	0.807266	45	40.265	0.526997	45	20.8558	0.784594	45	10.7691	0.471369	45	41.6205	0.944143	45	23.7971	0.781292			24.5159	9.27888
	50	24.0998	0.494122	50	24.1645	0.425365	50	25.0893	0.501984	50	26.0313	0.374567	50	42.1027	0.542865	50	27.7573	0.617404	50	28.4466	0.447892	50	26.2457	0.619398	50	47.4418	0.843962	50	26.6276	0.795735	50	30.437	0.529893	50	24.8257	0.816099	50	15.7037	0.547642	50	48.791	1.02444	50	32.7689	0.778555			30.0355	8.88606
	55	43.7998	0.502717	55	40.9188	0.442153	55	33.3873	0.497319	55	38.0157	0.462798	55	75.3144	0.517306	55	57.2833	0.609387	55	38.7241	0.417792	55	29.3519	0.607827	55	54.4199	0.814284	55	45.3873	0.812693	55	41.0053	0.646529	55	28.344	0.719116	55	21.7634	0.616879	55	75.13	1.00017	55	70.0848	0.728029			46.1953	16.317
	60	61.7015	0.487861	60	67.4922	0.43554	60	68.5833	0.584838	60	60.6026	0.510538	60	130.286	0.539323	60	123.852	0.675599	60	113.927	0.422213	60	38.0381	0.495417	60	65.0486	0.768223	60	72.0773	1.04067	60	56.4112	0.718459	60	35.5266	0.666278	60	42.6102	0.537105	60	105.812	0.929168	60	97.0753	0.749647			75.9363	29.766
	65	125.988	0.576244	65	103.461	0.431645	65	131.746	0.561458	65	76.7809	0.522471	65	159.697	0.676266	65	188.501	0.671629	65	224.821	0.532183	65	93.2931	0.54258	65	103.935	0.682085	65	109.688	1.08436	65	83.7151	0.660448	65	44.8128	0.603121	65	85.643	0.599196	65	129.665	0.727182	65	105.186	0.769713			117.795	43.999
	70	159.029	0.631582	70	126.125	0.557951	70	145.5	0.435281	70	99.1964	0.531614	70	154.9	0.680484	70	102.67	0.70336	70	165.648	0.400881	70	102.061	0.528948	70	135.107	0.666436	70	120.564	0.980837	70	120.191	0.64378	70	62.6963	0.61185	70	130.613	0.654433	70	97.15	0.677609	70	127.503	0.902815			123.264	26.5974
	75	119.058	0.52112	75	123.265	0.602738	75	103.95	0.545462	75	151.719	0.609753	75	136.025	0.638297	75	75.0192	0.622643	75	146.228	0.361004	75	78.2113	0.486747	75	113.895	0.627884	75	129.547	0.934417	75	156.829	0.692112	75	83.0162	0.687977	75	227.211	0.64605	75	96.9812	0.687732	75	165.195	0.88928			127.077	38.4339
	80	89.8266	0.540721	80	82.9527	0.54298	80	47.65	0.463723	80	131.273	0.591832	80	75.4167	0.554867	80	27.9642	0.635877	80	131.388	0.421526	80	72.4589	0.548493	80	98.32	0.62708	80	41.2976	0.911882	80	167.733	0.732811	80	94.8341	0.766826	80	145.395	0.670905	80	90.6843	0.739817	80	167.343	0.861132			97.6359	41.8823
	85	51.573	0.504887	85	72.2441	0.56729	85	29.8167	0.474357	85	59.7056	0.496711	85	43.1354	0.543789	85	15.2678	0.647928	85	103.974	0.555612	85	50.5116	0.733773	85	78.301	0.628678	85	25.2067	0.959086	85	111.033	0.763776	85	81.0655	0.789674	85	93.7792	0.606179	85	64.2522	0.825386	85	128.627	0.80422			67.2329	31.7478
	90	33.6483	0.523328	90	48.1967	0.570386	90	22.2127	0.570894	90	41.3407	0.530122	90	30.819	0.593943	90	12.8455	0.624579	90	55.4837	0.566325	90	36.0197	0.746696	90	70.5178	0.652898	90	19.2435	1.06649	90	61.8267	0.709026	90	62.4587	0.757268	90	47.7615	0.688367	90	66.1421	0.82548	90	81.9058	0.843264			46.0282	19.6648
	95	23.7965	0.559756	95	30.7824	0.558693	95	15.859	0.573436	95	31.2513	0.592935	95	22.2036	0.575604	95	8.3282	0.627481	95	35.8224	0.517195	95	25.8056	0.742068	95	60.6533	0.575408	95	13.3523	1.12759	95	37.6405	0.686449	95	35.9971	0.754766	95	28.8462	0.656963	95	63.1254	0.760893	95	63.8634	0.798247			33.1552	16.7923
	100	18.0814	0.532184	100	20.9511	0.563693	100	11.9175	0.65455	100	27.8385	0.609671	100	17.933	0.590474	100	4.70128	0.659973	100	23.5527	0.566888	100	21.4525	0.752425	100	48.2533	0.470834	100	11.7774	0.979566	100	27.5653	0.627031	100	22.4727	0.860617	100	16.7003	0.625202	100	30.1323	0.570098	100	35.1818	0.69136			22.5674	10.1941
[truncated: 5 more columns]

## Sheet: Summary
% Chromosome Length		Mean	STDDEV	SEM		Mean	STDDEV	SEM
0-5	IF	1	0	0	FISH	12.7884	4.30499	1.11154
5-10		1.00574	0.127669	0.0329641		14.1557	5.59871	1.44558
10-15		0.860593	0.150964	0.0389788		14.6459	5.55064	1.43317
15-20		0.738576	0.167048	0.0431315		15.793	7.47972	1.93125
20-25		0.672634	0.160039	0.041322		16.9224	8.81842	2.27691
25-30		0.660853	0.143121	0.0369537		18.2808	7.64779	1.97465
30-35		0.636041	0.143389	0.0370229		18.7978	7.03205	1.81567
35-40		0.605029	0.155802	0.0402278		20.217	7.82469	2.02033
40-45		0.612523	0.175289	0.0452594		24.5159	9.27888	2.3958
45-50		0.623995	0.179777	0.0464182		30.0355	8.88606	2.29437
50-55		0.626333	0.158714	0.0409798		46.1953	16.317	4.21303
55-60		0.637392	0.174058	0.0449415		75.9363	29.766	7.68554
60-65		0.642706	0.145574	0.037587		117.795	43.999	11.3605
65-70		0.640524	0.146967	0.0379467		123.264	26.5974	6.86741
70-75		0.636881	0.137394	0.0354751		127.077	38.4339	9.9236
75-80		0.640698	0.135309	0.0349366		97.6359	41.8823	10.814
80-85		0.66009	0.139723	0.0360764		67.2329	31.7478	8.19726
85-90		0.684605	0.142191	0.0367135		46.0282	19.6648	5.07744
90-95		0.673832	0.148216	0.0382691		33.1552	16.7923	4.33575
95-100		0.650304	0.12605	0.0325459		22.5674	10.1941	2.6321
