# Supplementary material for: Large domains of heterochromatin direct the formation of short mitotic chromosome loops
Source: eLife. 2020 Sep 11;9:e57212. doi: 10.7554/eLife.57212 (PMC7515631; doi:10.7554/eLife.57212)
Supplement: Figure 6—source data 2. [file elife-57212-fig6-data2.xlsx]

## Sheet: FISH Binned
		5		6		7		9		12		13		16A		16B		17		19		20A		20B		21		22		23		24		25A		25B		27		28A		28B		29A		29B		31
X	X	Y	X	Y	X	Y	X	Y	X	Y	X	Y	X	Y	X	Y	X	Y	X	Y	X	Y	X	Y	X	Y	X	Y	X	Y	X	Y	X	Y	X	Y	X	Y	X	Y	X	Y	X	Y	X	Y	X	Y	X
0	0	177	0	199	0	174	0	200	0	166	0	169	0	149	0	189	0	200	0	191	0	173	0	160	0	169	0	178	0	159	0	159	0	200	0	211	0	165	0	206	0	179	0	190	0	200	0	161	0
0.11	2	182.675	1.81818	200.87	1.92308	171.961	2.43902	186.126	2.22222	178.778	2.32558	163.433	1.25	157.309	1.92308	194.595	2.63158	196.038	2.12766	182.913	2.27273	178.245	1.92308	162.118	2.08333	166	2.17391	178.999	1.36986	156.536	2.04082	143.144	2.94118	215.361	2.77778	207.183	1.14943	162.462	2.77778	182.398	2.63158	166.629	2.27273	197.316	2.43902	190.353	1.88679	164.807	1.88679
0.22	4	187.089	3.63636	212.89	3.84615	167.093	4.87805	184.138	4.44444	181.289	4.65116	167.958	2.5	156.096	3.84615	178.775	5.26316	194.855	4.25532	181.674	4.54545	174.756	3.84615	162.5	4.16667	166.6	4.34783	191.102	2.73973	157.728	4.08163	148.751	5.88235	211.846	5.55556	214.983	2.29885	160.941	5.55556	180.557	5.26316	171.215	4.54545	191.7	4.87805	180.627	3.77358	172.213	3.77358
0.33	6	183.491	5.45455	205.869	5.76923	167.649	7.31707	192.056	6.66667	183.764	6.97674	167.769	3.75	157.02	5.76923	187.476	7.89474	198.076	6.38298	179.817	6.81818	175.85	5.76923	162.604	6.25	167.12	6.52174	186.939	4.10959	167.401	6.12245	147.745	8.82353	216.786	8.33333	224.359	3.44828	156.711	8.33333	183.247	7.89474	167.602	6.81818	190.403	7.31707	171.122	5.66038	165.265	5.66038
0.44	8	178.877	7.27273	220.387	7.69231	171.805	9.7561	193.723	8.88889	187.019	9.30233	163.075	5	171.511	7.69231	181.85	10.5263	201.882	8.51064	178.625	9.09091	168.266	7.69231	161.8	8.33333	162.64	8.69565	199.375	5.47945	161.534	8.16327	157.647	11.7647	224.179	11.1111	211.763	4.5977	156.917	11.1111	194.538	10.5263	175.862	9.09091	193.631	9.7561	170.417	7.54717	173.586	7.54717
0.55	10	180.971	9.09091	212.52	9.61538	167.733	12.1951	196.233	11.1111	176.837	11.6279	170.213	6.25	159.938	9.61538	191.261	13.1579	195.958	10.6383	174.152	11.3636	172.887	9.61538	158.804	10.4167	167	10.8696	191.667	6.84932	163.949	10.2041	148.177	14.7059	215.316	13.8889	223.692	5.74713	156.702	13.8889	188.428	13.1579	183.781	11.3636	190.269	12.1951	169.037	9.43396	171.827	9.43396
0.66	12	181.985	10.9091	205.484	11.5385	176.195	14.6341	188.077	13.3333	177.713	13.9535	170.811	7.5	160.393	11.5385	189.732	15.7895	191.401	12.766	168.877	13.6364	171.716	11.5385	160.167	12.5	176	13.0435	194.89	8.21918	162.228	12.2449	158.983	17.6471	241.407	16.6667	233.186	6.89655	160.016	16.6667	200.306	15.7895	182.917	13.6364	184.04	14.6341	181.544	11.3208	174.777	11.3208
0.77	14	184.278	12.7273	203.227	13.4615	173.385	17.0732	180.204	15.5556	183.832	16.2791	172.718	8.75	154.847	13.4615	183.738	18.4211	195.299	14.8936	177.011	15.9091	178.766	13.4615	167.034	14.5833	161	15.2174	181.537	9.58904	161.766	14.2857	154.514	20.5882	254.162	19.4444	249.586	8.04598	156.8	19.4444	193.795	18.4211	190.467	15.9091	196.754	17.0732	178.944	13.2075	179.172	13.2075
0.88	16	195.305	14.5455	206.657	15.3846	178.066	19.5122	182.315	17.7778	179.177	18.6047	182.07	10	158.327	15.3846	193.447	21.0526	192.258	17.0213	174.788	18.1818	177.669	15.3846	167.72	16.6667	164	17.3913	195.72	10.9589	154.981	16.3265	159.457	23.5294	253.798	22.2222	262.475	9.1954	153.509	22.2222	198.318	21.0526	189.542	18.1818	191.498	19.5122	176.188	15.0943	176.225	15.0943
0.99	18	180.329	16.3636	210.809	17.3077	181.959	21.9512	181.97	20	178.722	20.9302	174.433	11.25	154.219	17.3077	177.411	23.6842	200.679	19.1489	182.463	20.4545	180.29	17.3077	165.717	18.75	163	19.5652	180.153	12.3288	161.727	18.3673	154.31	26.4706	256.451	25	264.707	10.3448	155.134	25	203.484	23.6842	188.979	20.4545	189.885	21.9512	175.37	16.9811	173.012	16.9811
1.1	20	184.928	18.1818	207.11	19.2308	178.319	24.3902	173.683	22.2222	189.635	23.2558	168.097	12.5	154.906	19.2308	177.577	26.3158	209.73	21.2766	177.893	22.7273	185.19	19.2308	162.868	20.8333	171.627	21.7391	206.481	13.6986	172.293	20.4082	159.885	29.4118	239.002	27.7778	275.811	11.4943	154.176	27.7778	215.786	26.3158	204.118	22.7273	191.676	24.3902	182.033	18.8679	175.17	18.8679
1.21	22	191.68	20	207.19	21.1538	181.671	26.8293	169.187	24.4444	184.898	25.5814	177.999	13.75	145.681	21.1538	177.309	28.9474	208.763	23.4043	174.329	25	181.983	21.1538	156.847	22.9167	167.889	23.913	208.362	15.0685	169.789	22.449	155.591	32.3529	241.314	30.5556	302.145	12.6437	155.032	30.5556	227.093	28.9474	227.75	25	193.501	26.8293	179.716	20.7547	178.07	20.7547
1.32	24	191.128	21.8182	213.07	23.0769	180.743	29.2683	173.939	26.6667	185.119	27.907	175.873	15	149.436	23.0769	176.386	31.5789	214.989	25.5319	177.037	27.2727	178.762	23.0769	158.917	25	174.594	26.087	213.929	16.4384	168.365	24.4898	159.909	35.2941	256.146	33.3333	309.101	13.7931	154.296	33.3333	220.031	31.5789	239.671	27.2727	199.161	29.2683	175.545	22.6415	179.1	22.6415
1.43	26	189.166	23.6364	223.412	25	175.888	31.7073	168.812	28.8889	189.966	30.2326	176.121	16.25	157.402	25	175.254	34.2105	228.999	27.6596	181.605	29.5455	192.769	25	168.55	27.0833	172.462	28.2609	210.231	17.8082	167.363	26.5306	162.861	38.2353	244.824	36.1111	337.289	14.9425	153.885	36.1111	239.262	34.2105	268.389	29.5455	204.152	31.7073	174.004	24.5283	179.487	24.5283
1.54	28	190.193	25.4545	234.245	26.9231	184.406	34.1463	177.219	31.1111	200.212	32.5581	176.784	17.5	153.765	26.9231	187.927	36.8421	237.454	29.7872	182.27	31.8182	187.101	26.9231	168.944	29.1667	170.268	30.4348	203.972	19.1781	161.25	28.5714	160.373	41.1765	279.729	38.8889	356.608	16.092	156.564	38.8889	252.871	36.8421	278.5	31.8182	210.478	34.1463	186.082	26.4151	191.174	26.4151
1.65	30	192.395	27.2727	215.463	28.8462	191.041	36.5854	173.303	33.3333	192.757	34.8837	191.982	18.75	157.059	28.8462	182.227	39.4737	234.91	31.9149	183.601	34.0909	196.406	28.8462	166.713	31.25	165.763	32.6087	226.961	20.5479	166.514	30.6122	160.775	44.1176	315.875	41.6667	361.071	17.2414	155.419	41.6667	293.605	39.4737	301.8	34.0909	235.534	36.5854	191.242	28.3019	183.87	28.3019
1.76	32	200.594	29.0909	208.304	30.7692	209.156	39.0244	181.56	35.5556	191.919	37.2093	185.232	20	152.742	30.7692	184.304	42.1053	256.99	34.0426	184.376	36.3636	190.259	30.7692	172.257	33.3333	175.562	34.7826	237.46	21.9178	173.657	32.6531	153.577	47.0588	359.729	44.4444	365.591	18.3908	152.586	44.4444	342.912	42.1053	335.751	36.3636	241.472	39.0244	190.027	30.1887	193.908	30.1887
1.87	34	213.931	30.9091	207.802	32.6923	259.628	41.4634	189.853	37.7778	189.245	39.5349	187.311	21.25	152.312	32.6923	177.29	44.7368	275.444	36.1702	195.099	38.6364	189.629	32.6923	172.577	35.4167	179.204	36.9565	236.826	23.2877	174.404	34.6939	159.149	50	402.504	47.2222	362.315	19.5402	156.582	47.2222	408.789	44.7368	378.21	38.6364	260.604	41.4634	189.69	32.0755	214.286	32.0755
1.98	36	205.069	32.7273	212.789	34.6154	257.169	43.9024	197.662	40	189.472	41.8605	190.209	22.5	155.098	34.6154	187.889	47.3684	272.864	38.2979	191.885	40.9091	187.298	34.6154	166.349	37.5	164.896	39.1304	253.17	24.6575	186.351	36.7347	159.795	52.9412	488.208	50	371.716	20.6897	153.065	50	475.55	47.3684	461.366	40.9091	259.898	43.9024	196.475	33.9623	237.738	33.9623
2.09	38	234.239	34.5455	210.51	36.5385	245.86	46.3415	198.918	42.2222	192.313	44.186	200.065	23.75	152.629	36.5385	193.096	50	286.806	40.4255	201.438	43.1818	203.702	36.5385	164.92	39.5833	167.421	41.3043	277.452	26.0274	188.751	38.7755	162.12	55.8824	574.047	52.7778	436.32	21.8391	156.04	52.7778	487.637	50	530.432	43.1818	285.412	46.3415	199.805	35.8491	210.722	35.8491
2.2	40	232.612	36.3636	208.535	38.4615	224.286	48.7805	230.827	44.4444	203.534	46.5116	217.848	25	157.834	38.4615	194.764	52.6316	322.815	42.5532	210.686	45.4545	215.424	38.4615	172.288	41.6667	168.443	43.4783	349.388	27.3973	174.111	40.8163	155.778	58.8235	622.838	55.5556	465.086	22.9885	157.075	55.5556	525.805	52.6316	603.821	45.4545	314.265	48.7805	209.446	37.7358	206.691	37.7358
2.31	42	242.437	38.1818	207.974	40.3846	209.267	51.2195	233.597	46.6667	222.405	48.8372	218.259	26.25	153.064	40.3846	207.317	55.2632	380.822	44.6809	209.535	47.7273	228.162	40.3846	181.619	43.75	166.581	45.6522	439.118	28.7671	170.808	42.8571	155.741	61.7647	688.693	58.3333	501.24	24.1379	158.125	58.3333	589.229	55.2632	621.044	47.7273	348.131	51.2195	210.857	39.6226	201.631	39.6226
2.42	44	275.358	40	209.119	42.3077	194.264	53.6585	246.99	48.8889	217.109	51.1628	276.194	27.5	149.718	42.3077	212.784	57.8947	440.004	46.8085	221.175	50	253.979	42.3077	186.753	45.8333	168.669	47.8261	528.553	30.137	170.283	44.898	162.665	64.7059	808.535	61.1111	521.469	25.2874	157.19	61.1111	650.823	57.8947	579.375	50	393.921	53.6585	225.721	41.5094	206.89	41.5094
2.53	46	290.373	41.8182	211.767	44.2308	196.213	56.0976	300.784	51.1111	220.348	53.4884	286.537	28.75	153.157	44.2308	231.614	60.5263	574.601	48.9362	236.961	52.2727	277.161	44.2308	192.595	47.9167	172.92	50	632.212	31.5068	174.232	46.9388	165.337	67.6471	827.083	63.8889	514.469	26.4368	163.774	63.8889	697.823	60.5263	539.386	52.2727	491.879	56.0976	252.245	43.3962	209.766	43.3962
2.64	48	304.794	43.6364	214.455	46.1538	204.838	58.5366	405.519	53.3333	242.922	55.814	298.701	30	150.54	46.1538	245.171	63.1579	661.956	51.0638	248.233	54.5455	310.362	46.1538	194.291	50	174.556	52.1739	709.645	32.8767	175.849	48.9796	173.064	70.5882	852.295	66.6667	470.629	27.5862	166.023	66.6667	759.422	63.1579	524.437	54.5455	642.814	58.5366	274.236	45.283	214.022	45.283
2.75	50	330.561	45.4545	220.523	48.0769	211.203	60.9756	495.183	55.5556	241.514	58.1395	332.951	31.25	150.762	48.0769	277.808	65.7895	728.493	53.1915	271.158	56.8182	336.011	48.0769	196.616	52.0833	172.543	54.3478	740.438	34.2466	178.408	51.0204	170.03	73.5294	822.123	69.4444	423.317	28.7356	152.42	69.4444	848.37	65.7895	487.462	56.8182	738.98	60.9756	313.684	47.1698	222.706	47.1698
2.86	52	370.114	47.2727	227.033	50	208.689	63.4146	620.06	57.7778	285.254	60.4651	423.609	32.5	152.443	50	318.311	68.4211	707.435	55.3191	302.574	59.0909	382.653	50	217.366	54.1667	186.757	56.5217	754.265	35.6164	175.087	53.0612	169.084	76.4706	821.646	72.2222	455.365	29.8851	155.88	72.2222	798.559	68.4211	525.238	59.0909	762.785	63.4146	396.058	49.0566	233.897	49.0566
2.97	54	415.788	49.0909	221.035	51.9231	219.461	65.8537	706.13	60	353.549	62.7907	575.539	33.75	151.361	51.9231	362.223	71.0526	672.413	57.4468	336.13	61.3636	426.469	51.9231	227.492	56.25	203.941	58.6957	762.87	36.9863	172.162	55.102	181.47	79.4118	859.062	75	420.635	31.0345	161.82	75	668.843	71.0526	613.658	61.3636	709.227	65.8537	538.12	50.9434	259.451	50.9434
3.08	56	486.937	50.9091	223.593	53.8462	231.748	68.2927	784.306	62.2222	447.669	65.1163	756.285	35	150.613	53.8462	442.737	73.6842	740.7	59.5745	346.88	63.6364	533.638	53.8462	232.221	58.3333	200.533	60.8696	733.646	38.3562	183.51	57.1429	183.896	82.3529	911.594	77.7778	389.849	32.1839	159.09	77.7778	552.053	73.6842	634.052	63.6364	660.156	68.2927	548.902	52.8302	294.373	52.8302
3.19	58	581.178	52.7273	239.541	55.7692	243.045	70.7317	815.177	64.4444	524.58	67.4419	904.073	36.25	147.064	55.7692	541.131	76.3158	832.096	61.7021	365.011	65.9091	616.268	55.7692	238.163	60.4167	214.065	63.0435	704.453	39.726	192.825	59.1837	189.091	85.2941	911.693	80.5556	341.933	33.3333	169.67	80.5556	472.217	76.3158	584.407	65.9091	747.85	70.7317	621.107	54.717	324.13	54.717
3.3	60	679.022	54.5455	265.46	57.6923	275.29	73.1707	688.503	66.6667	617.009	69.7674	1058.01	37.5	144.25	57.6923	630.196	78.9474	909.392	63.8298	429.886	68.1818	730.616	57.6923	270.786	62.5	226.352	65.2174	667.994	41.0959	184.387	61.2245	211.463	88.2353	799.443	83.3333	288.252	34.4828	159.33	83.3333	450.575	78.9474	557.302	68.1818	851.449	73.1707	748.08	56.6038	394.561	56.6038
3.41	62	812.631	56.3636	305.659	59.6154	312.743	75.6098	572.002	68.8889	711.861	72.093	1158.55	38.75	150.243	59.6154	655.784	81.5789	824.863	65.9574	498.534	70.4545	848.6	59.6154	318.841	64.5833	266.131	67.3913	617.492	42.4658	194.698	63.2653	239.107	91.1765	665.21	86.1111	289.164	35.6322	159.97	86.1111	405.726	81.5789	554.915	70.4545	921.234	75.6098	823.263	58.4906	439.522	58.4906
3.52	64	881.995	58.1818	328.354	61.5385	392.777	78.0488	497.23	71.1111	950.89	74.4186	1068.34	40	152.534	61.5385	677.567	84.2105	706.666	68.0851	529.741	72.7273	898.232	61.5385	383.209	66.6667	350.773	69.5652	592.141	43.8356	202.425	65.3061	261.848	94.1176	497.033	88.8889	334.168	36.7816	163.88	88.8889	331.486	84.2105	523.328	72.7273	1026.58	78.0488	894.937	60.3774	483.922	60.3774
3.63	66	898.132	60	345.554	63.4615	439.028	80.4878	367.039	73.3333	1125.01	76.7442	950.656	41.25	151.432	63.4615	608.357	86.8421	515.503	70.2128	542.991	75	976.77	63.4615	472.06	68.75	460.248	71.7391	552.927	45.2055	205.493	67.3469	285.923	97.0588	379.259	91.6667	344.088	37.931	165.94	91.6667	284.989	86.8421	515.481	75	1054.65	80.4878	853.297	62.2642	507.588	62.2642
3.74	68	854.092	61.8182	401.574	65.3846	449.999	82.9268	336.252	75.5556	1091	79.0698	880.021	42.5	152.728	65.3846	615.134	89.4737	433.562	72.3404	615.5	77.2727	1052.16	65.3846	563.691	70.8333	558.529	73.913	475.919	46.5753	224.489	69.3878	316.731	100	348.738	94.4444	352.57	39.0805	152.42	94.4444	249.299	89.4737	475.167	77.2727	1080.48	82.9268	753.614	64.1509	494.565	64.1509
3.85	70	741.234	63.6364	456.801	67.3077	484.201	85.3659	322.858	77.7778	932.183	81.3953	955.196	43.75	147.58	67.3077	590.605	92.1053	356.199	74.4681	664.37	79.5455	1074.08	67.3077	627.38	72.9167	618.272	76.087	394.4	47.9452	242.445	71.4286	347.762			97.2222	347.342	40.2299	158.79	97.2222	223.732	92.1053	423.385	79.5455	1091.78	85.3659	592.906	66.0377	546.074	66.0377
3.96	72	617.355	65.4545	473.568	69.2308	546.773	87.8049	308.632	80	679.029	83.7209	915.052	45	148.187	69.2308	605.135	94.7368	292.691	76.5957	676.282	81.8182	1065.09	69.2308	696.816	75	691.3	78.2609	346.873	49.3151	271.478	73.4694	384.48			100	304.768	41.3793	165.79	100	213.146	94.7368	354.219	81.8182	1073.36	87.8049	483.09	67.9245	603.691	67.9245
4.07	74	527.451	67.2727	570.659	71.1538	559.441	90.2439	285.516	82.2222	506.82	86.0465	825.084	46.25	148.648	71.1538	577.592	97.3684	278.571	78.7234	650.779	84.0909	1013.09	71.1538	704.748	77.0833	619.95	80.4348	317.509	50.6849	290.032	75.5102	425.85					42.5287	159.21			97.3684	313.831	84.0909	922.665	90.2439	380.04	69.8113	639.637	69.8113
4.18	76	459.37	69.0909	644.084	73.0769	607.799	92.6829	266.53	84.4444	420.016	88.3721	652.984	47.5	155.859	73.0769	562.333	100	248.1	80.8511	669.278	86.3636	921.845	73.0769	748.78	79.1667	550.45	82.6087	285.394	52.0548	276.407	77.551	420.05					43.6782	164.82			100	289.883	86.3636	760.602	92.6829	326.696	71.6981	615.039	71.6981
4.29	78	410.767	70.9091	743.425	75	612.048	95.122	228.783	86.6667	326.473	90.6977	595.488	48.75	152.205	75	556.539			82.9787	618.113	88.6364	730.186	75	758.866	81.25	414	84.7826	259.316	53.4247	297.678	79.5918	367.91					44.8276	165.97					88.6364	657.658	95.122	279.619	73.5849	575.574	73.5849
4.4	80	356.8	72.7273	880.881	76.9231	613.528	97.561	204.876	88.8889	294.747	93.0233	457.653	50	152.048	76.9231	552.653			85.1064	595.087	90.9091	550.468	76.9231	723.053	83.3333	368.05	86.9565	239.299	54.7945	266.951	81.6327	319.11					45.977	167.94					90.9091	560.818	97.561	259.424	75.4717	602.281	75.4717
4.51	82	317.467	74.5455	941.729	78.8462	639.008	100	206.068	91.1111	263.663	95.3488	378.722	51.25	152.016	78.8462	548.657			87.234	506.485	93.1818	433.676	78.8462	689.974	85.4167	313.75	89.1304	223.967	56.1644	253.183	83.6735	288.27					47.1264	168.97					93.1818	482.54	100	235.739	77.3585	620.541	77.3585
4.62	84	279.262	76.3636	883.299	80.7692	596.538			93.3333	248.351	97.6744	305.698	52.5	152.429	80.7692	497.944			89.3617	417.951	95.4545	371.777	80.7692	645.754	87.5	300.55	91.3043	214.331	57.5342	244.813	85.7143	264.76					48.2759	170.351					95.4545	405.971			79.2453	557.834	79.2453
4.73	86	261.247	78.1818	779.286	82.6923	502.823			95.5556	237.244	100	275.299	53.75	149.047	82.6923	476.756			91.4894	378.307	97.7273	332.612	82.6923	520.394	89.5833	236.35	93.4783	204.996	58.9041	239.778	87.7551	236.68					49.4253	187.561					97.7273	352.834			81.1321	460.602	81.1321
4.84	88	245.571	80	624.205	84.6154	434.714			97.7778	219.629			55	149.445	84.6154	462.025			93.617	370.46	100	288.651	84.6154	407	91.6667	214	95.6522	203.328	60.274	244.238	89.7959	213.86					50.5747	191.393					100	322.996			83.0189	360.902	83.0189
4.95	90	243.347	81.8182	562.751	86.5385	345.136			100	202.487			56.25	146.786	86.5385	359.79			95.7447	388.302			86.5385	356.302	93.75	219.65	97.8261	191.285	61.6438	245.017	91.8367	201.39					51.7241	191.294									84.9057	326.106	84.9057
5.06	92	220.876	83.6364	512.155	88.4615	318.95							57.5	150.626	88.4615	313.723			97.8723	458.467			88.4615	317.629	95.8333	201.95	100	194.093	63.0137	246.346	93.8776	190.39					52.8736	200.471									86.7925	301.878	86.7925
5.17	94	223.809	85.4545	419.782	90.3846	284.662							58.75	151.433	90.3846	270.571			100	537.476			90.3846	240.752	97.9167	203.85			64.3836	279.097	95.9184	177.35					54.023	198.142									88.6792	277.099	88.6792
5.28	96	219.205	87.2727	354.44	92.3077	253.529							60	157.463	92.3077	254.982							92.3077	226.702	100	217.3			65.7534	292.81	97.9592	170.51					55.1724	191.048									90.566	250.754	90.566
5.39	98	208.055	89.0909	295.711	94.2308	234.062							61.25	158.452	94.2308	228.301							94.2308	229.533					67.1233	319.669	100	165.9					56.3218	194.967									92.4528	228.002	92.4528
5.5	100	206.887	90.9091	288.672	96.1538	227.683							62.5	165.839	96.1538	237.449							96.1538	219.276					68.4932	343.539							57.4713	202.548									94.3396	225.888	94.3396
5.61			92.7273	271.676	98.0769	213.276							63.75	164.028	98.0769	213.157							98.0769	211.386					69.863	344.635							58.6207	220.695									96.2264	220.325	96.2264
5.72			94.5455	257.018	100	203.11							65	165.374	100	195.173							100	197.317					71.2329	339.456							59.7701	234.636									98.1132	204.607	98.1132
5.83			96.3636	255.056									66.25	163.162															72.6027	373.92							60.9195	235.29									100	197.216	100
5.94			98.1818	241.455									67.5	158.034															73.9726	444.952							62.069	234.83
6.05			100	245.74									68.75	176.813															75.3425	496.869							63.2184	242.632
6.16													70	182.528															76.7123	512.631							64.3678	273.265
6.27													71.25	177.89															78.0822	492.722							65.5172	307.66
6.38													72.5	203.851															79.4521	468.897							66.6667	333.715
6.49													73.75	203.552															80.8219	457.105							67.8161	368.133
6.6													75	219.202															82.1918	393.867							68.9655	393.037
6.71													76.25	245.78															83.5616	285.802							70.1149	439.586
6.82													77.5	300.493															84.9315	254.037							71.2644	483.976
6.93													78.75	388.235															86.3014	232.196							72.4138	510.33
7.04													80	485.21															87.6712	208.718							73.5632	508.752
7.15													81.25	532.991															89.0411	197.81							74.7126	467.813
7.26													82.5	572.214															90.411	196.662							75.8621	388.87
7.37													83.75	527.589															91.7808	198.661							77.0115	315.892
7.48													85	492.672															93.1507	196.627							78.1609	274.92
7.59													86.25	536.044															94.5205	191.822							79.3103	242.013
7.7													87.5	576.144															95.8904	187.316							80.4598	220.04
7.81													88.75	512.231															97.2603	189.317							81.6092	210.923
7.92													90	386.502															98.6301	184.51							82.7586	204.441
8.03													91.25	312.66															100	171.563							83.908	206.672
8.14													92.5	284.686																							85.0575	198.224
8.25													93.75	253.171																							86.2069	193.676
8.36													95	225.714																							87.3563	202.608
8.47													96.25	214.95																							88.5057	193.156
8.58													97.5	203.728																							89.6552	187.225
8.69													98.75	194.816																							90.8046	177.998
8.8													100	190.744																							91.954	181.638
8.91																																					93.1034	182.935
9.02																																					94.2529	181.736
9.13																																					95.4023	171.996
9.24																																					96.5517	165.333
9.35																																					97.7011	170.033
9.46																																					98.8506	169.988
9.57																																					100	166.085
	0		0		0		0		0		0		0		0		0		0		0		0		0		0		0		0		0		0		0		0		0		0		0		0		0
	5	182.255	5	204.253	5	171.018	5	190.088	5	175.356	5	166.797	5	158.187	5	187.457	5	198.019	5	185.196	5	175.334	5	161.539	5	167.2	5	182.7	5	160.166	5	150.298	5	207.68	5	209.091	5	160.406	5	194.199	5	172.815	5	193.005	5	190.327	5	166.007	5
	10	181.113	10	212.925	10	169.062	10	192.889	10	185.392	10	165.422	10	161.003	10	186.862	10	196.465	10	179.221	10	172.058	10	161.069	10	164.88	10	193.157	10	162.369	10	152.696	10	214.316	10	219.671	10	156.757	10	181.902	10	169.409	10	192.017	10	170.769	10	170.226	10
	15	182.411	15	205.123	15	174.79	15	192.155	15	177.275	15	170.512	15	152.514	15	186.735	15	198.92	15	173.347	15	172.302	15	163.601	15	168	15	193.279	15	163	15	153.891	15	219.748	15	217.728	15	154.505	15	191.483	15	179.822	15	187.154	15	175.291	15	176.974	15
	20	186.854	20	208.37	20	179.448	20	181.26	20	180.577	20	177.394	20	154.081	20	182.812	20	193.35	20	178.625	20	178.218	20	165.435	20	163.5	20	185.803	20	166.692	20	156.883	20	241.407	20	241.386	20	155.288	20	197.05	20	186.692	20	194.126	20	177.566	20	174.802	20
	25	189.245	25	214.557	25	179.434	25	177.827	25	184.418	25	171.265	25	154.123	25	176.316	25	196.469	25	176.111	25	182.488	25	161.438	25	171.37	25	207.421	25	175.232	25	158.462	25	253.98	25	263.591	25	156.076	25	200.901	25	189.261	25	191.687	25	178.702	25	178.886	25
	30	190.585	30	219.337	30	183.778	30	171.563	30	187.543	30	176.936	30	152.863	30	181.803	30	209.246	30	180.304	30	184.505	30	168.069	30	172.441	30	212.08	30	177.89	30	161.617	30	247.727	30	270.259	30	159.057	30	209.635	30	215.934	30	198.938	30	177.63	30	187.522	30
	35	202.307	35	210.367	35	241.984	35	173.016	35	196.484	35	181.629	35	151.144	35	183.161	35	221.994	35	183.988	35	191.754	35	170.394	35	170.663	35	222.798	35	174.693	35	157.834	35	241.314	35	305.623	35	162.477	35	223.562	35	254.03	35	223.006	35	180.043	35	215.311	35
	40	223.973	40	208.543	40	235.073	40	177.431	40	190.212	40	186.272	40	148.941	40	193.93	40	236.182	40	193.492	40	189.944	40	168.604	40	170.507	40	244.998	40	180.896	40	160.957	40	250.485	40	346.948	40	160.553	40	246.067	40	290.15	40	251.038	40	190.635	40	206.348	40
	45	250.136	45	211.78	45	199.915	45	193.757	45	195.106	45	195.137	45	150.492	45	217.238	45	266.217	45	207.22	45	195.5	45	186.989	45	167.512	45	313.42	45	193.837	45	158.061	45	297.802	45	363.331	45	162.916	45	318.259	45	356.981	45	272.655	45	193.082	45	208.328	45
	50	308.576	50	222.864	50	208.243	50	214.873	50	219.757	50	218.053	50	151.389	50	280.43	50	279.835	50	229.068	50	232.522	50	202.758	50	172.048	50	533.294	50	235.976	50	169.2	50	381.116	50	367.015	50	173.706	50	442.169	50	495.899	50	352.106	50	204.625	50	223.542	50
	55	372.154	55	242.865	55	219.966	55	240.293	55	231.635	55	281.365	55	150.997	55	374.424	55	304.81	55	259.696	55	280.501	55	225.693	55	177.952	55	694.098	55	282.767	55	169.557	55	445.356	55	404.018	55	195.325	55	481.594	55	567.127	55	509.538	55	218.289	55	292.651	55
	60	582.379	60	326.522	60	277.026	60	353.151	60	293.439	60	315.826	60	151.151	60	609.037	60	410.413	60	328.528	60	359.332	60	275.93	60	202.237	60	758.567	60	245.925	60	184.819	60	598.442	60	483.163	60	208.779	60	557.517	60	600.209	60	750.882	60	263.24	60	417.041	60
	65	791.216	65	401.31	65	415.903	65	557.621	65	441.933	65	499.574	65	162.231	65	642.962	65	618.279	65	397.449	65	480.053	65	427.635	65	235.516	65	719.049	65	253.674	65	225.285	65	748.614	65	517.969	65	246.504	65	674.323	65	531.911	65	684.691	65	354.871	65	495.358	65
	70	831.153	70	562.77	70	493.658	70	745.218	70	664.435	70	906.122	70	169.182	70	603.625	70	717.964	70	514.138	70	673.442	70	629.296	70	405.51	70	625.876	70	325.163	70	288.167	70	827.083	70	446.973	70	350.636	70	803.896	70	506.35	70	799.649	70	543.511	70	596.467	70
	75	628.68	75	855.345	75	593.096	75	751.84	75	1037.95	75	1113.44	75	197.405	75	565.488	75	706.557	75	607.62	75	907.867	75	737.465	75	622.7	75	514.423	75	386.109	75	366.121	75	837.209	75	438	75	482.091	75	733.701	75	623.855	75	1000.82	75	684.593	75	595.306	75
	80	408.979	80	762.263	80	621.528	80	534.616	80	900.738	80	915.338	80	327.784	80	552.616	80	870.744	80	663.531	80	1034.34	80	723.964	80	620.567	80	370.636	80	492.78	80	404.603	80	840.354	80	405.242	80	305.424	80	610.448	80	570.855	80	1075.64	80	859.1	80	593.552	80
	85	317.843	85	566.37	85	511.358	85	351.645	85	535.288	85	935.124	85	522.135	85	478.908	85	765.764	85	643.696	85	1039.09	85	524.383	85	391.025	85	287.406	85	347.703	85	303.69	85	911.594	85	315.092	85	210.519	85	461.396	85	539.121	85	998.014	85	803.456	85	382.537	85
	90	250.055	90	356.644	90	332.043	90	315.745	90	310.61	90	739.034	90	500.719	90	336.757	90	474.533	90	506.508	90	826.015	90	336.966	90	283.55	90	231.633	90	212.908	90	238.433	90	855.568	90	311.666	90	194.978	90	368.606	90	495.324	90	709.13	90	537.998	90	289.488	90
	95	229.344	95	272.455	95	257.418	95	276.023	95	256.007	95	526.571	95	292.547	95	251.285	95	324.445	95	374.384	95	492.072	95	232.329	95	216.825	95	209.663	95	195.943	95	195.89	95	581.121	95	348.329	95	181.077	95	267.144	95	388.802	95	521.679	95	353.368	95	234.881	95
	100	211.382	100	247.417	100	214.69	100	213.242	100	219.787	100	319.906	100	205.99	100	215.26	100	263.336	100	461.415	100	331.013	100	209.326	100	207.7	100	196.235	100	183.177	100	171.253	100	363.999	100	326.055	100	168.687	100	218.439	100	301.857	100	360.6	100	258.261	100	207.383	100
[truncated: 35 more columns]

## Sheet: IF Binned
		5		6		7		9		12		13		16A		16B		17		19		20A		20B		21		22		23		24		25A		25B		27		28A		28B		29A		29B		31
X	X	Y	X	Y	X	Y	X	Y	X	Y	X	Y	X	Y	X	Y	X	Y	X	Y	X	Y	X	Y	X	Y	X	Y	X	Y	X	Y	X	Y	X	Y	X	Y	X	Y	X	Y	X	Y	X	Y	X	Y	X
0	0	14800	0	19680	0	11072	0	13920	0	12704	0	8944	0	8880	0	21552	0	23408	0	25632	0	18608	0	14176	0	10176	0	16624	0	7712	0	10144	0	17936	0	32288	0	10768	0	19216	0	20752	0	18784	0	16576	0	16944	0
0.11	2.17391	13645.4	2.7027	20503.4	1.92308	12896.3	2.94118	13101.8	2.32558	12755.1	2.27273	9274.24	1.28205	8602.55	2.08333	21293.1	3.0303	25043.9	2.43902	25103.8	2.22222	18585.7	1.92308	16158.5	2.27273	10901.8	3.0303	16539.5	1.49254	7554.65	2	11002.3	3.33333	17909.2	3.125	32630.3	1.17647	10539.6	2.77778	20262.5	3.7037	20024.3	2.04082	18476.4	2.94118	16054.8	2.12766	16492.1	2.17391
0.22	4.34783	13122.9	5.40541	18967.7	3.84615	13462.5	5.88235	13005.9	4.65116	12775.8	4.54545	9235.2	2.5641	8552.43	4.16667	19761.3	6.06061	26003.2	4.87805	24086.1	4.44444	18147.4	3.84615	17265.3	4.54545	10562.3	6.06061	16203.5	2.98507	7459.58	4	10249.3	6.66667	17107.2	6.25	32289.8	2.35294	10552	5.55556	21480.9	7.40741	20377.2	4.08163	20257.8	5.88235	14624.7	4.25532	15085.8	4.34783
0.33	6.52174	12575.7	8.10811	16777	5.76923	12986.2	8.82353	11549.4	6.97674	11791.8	6.81818	9702.4	3.84615	7712.38	6.25	19385.3	9.09091	25870.5	7.31707	22801.4	6.66667	17562.5	5.76923	18078.6	6.81818	10121	9.09091	15931.5	4.47761	7113.99	6	9693.12	10	15945.5	9.375	30746.3	3.52941	10903.2	8.33333	20663.6	11.1111	19005.1	6.12245	19761.7	8.82353	12740.3	6.38298	14049.5	6.52174
0.44	8.69565	11941.9	10.8108	13588	7.69231	12934.8	11.7647	10471.5	9.30233	11184.9	9.09091	9358.72	5.12821	7343.13	8.33333	17100.7	12.1212	23336.7	9.7561	20573.8	8.88889	15707.3	7.69231	18131.3	9.09091	8734.04	12.1212	16101.1	5.97015	6912.16	8	9557.18	13.3333	15627	12.5	29742.2	4.70588	11400.6	11.1111	18427.6	14.8148	17286.2	8.16327	17755.5	11.7647	10719.4	8.51064	12821.4	8.69565
0.55	10.8696	9900.6	13.5135	13564.2	9.61538	12686.7	14.7059	10140.8	11.6279	10269.1	11.3636	8544	6.41026	6390.12	10.4167	15958.6	15.1515	21011	12.1951	18010.5	11.1111	14669.7	9.61538	16845	11.3636	7973.64	15.1515	16544	7.46269	6591.15	10	8317.92	16.6667	14323.9	15.625	27365.2	5.88235	10844.4	13.8889	17041.7	18.5185	15289.8	10.2041	15387.4	14.7059	9049.63	10.6383	11648.3	10.8696
0.66	13.0435	8738.23	16.2162	12573.5	11.5385	12423.8	17.6471	9421.39	13.9535	9695.46	13.6364	7946.24	7.69231	6038.21	12.5	14921.4	18.1818	18209.3	14.6341	15849.9	13.3333	13760.5	11.5385	14785.5	13.6364	6903.07	18.1818	15562.8	8.95522	6922.74	12	7219.64	20	12759.9	18.75	24140	7.05882	9669.06	16.6667	14706	22.2222	13186.3	12.2449	13011	17.6471	8300.11	12.766	10590.3	13.0435
0.77	15.2174	8516.29	18.9189	11739.5	13.4615	10705	20.5882	8723.24	16.2791	10074.6	15.9091	7763.2	8.97436	5985.62	14.5833	14622.8	21.2121	16091.1	17.0732	15354.4	15.5556	12732.5	13.4615	12150.4	15.9091	6606.39	21.2121	14201.7	10.4478	6715.87	14	6882.02	23.3333	11737.9	21.875	19758.7	8.23529	8488.99	19.4444	14401	25.9259	10739.8	14.2857	10937.4	20.5882	8080.71	14.8936	8872.32	15.2174
0.88	17.3913	8236.17	21.6216	12003.1	15.3846	8860.62	23.5294	8706.03	18.6047	9988.84	18.1818	7262.08	10.2564	5675.86	16.6667	13822.7	24.2424	15065.5	19.5122	14470.8	17.7778	12358.2	15.3846	10041.5	18.1818	5991.39	24.2424	13037.6	11.9403	6509.13	16	6796.84	26.6667	11215.3	25	18845.5	9.41176	7585.04	22.2222	13645.5	29.6296	10648.1	16.3265	11070.9	23.5294	8114.92	17.0213	8141.85	17.3913
0.99	19.5652	7705.06	24.3243	11670.6	17.3077	7236.57	26.4706	9006.07	20.9302	10439.5	20.4545	6938.24	11.5385	5657.29	18.75	14936.8	27.2727	14505.4	21.9512	15083.7	20	11607.4	17.3077	8875.77	20.4545	5759.36	27.2727	12392.5	13.4328	5984.62	18	7146.54	30	10771.4	28.125	17950.2	10.5882	7045.7	25	13481.6	33.3333	10790	18.3673	11260.1	26.4706	9273.82	19.1489	7659.45	19.5652
1.1	21.7391	7744.02	27.027	12498.7	19.2308	6646.82	29.4118	9507.39	23.2558	10993.5	22.7273	7120	12.8205	5202.18	20.8333	15299.9	30.303	14653	24.3902	14773.1	22.2222	10899.4	19.2308	8316.84	22.7273	6084.48	30.303	11234.2	14.9254	5836.54	20	6906.55	33.3333	10009.8	31.25	17200.4	11.7647	6769.36	27.7778	13182.2	37.037	11830.7	20.4082	10651.7	29.4118	10638.2	21.2766	7894.53	21.7391
1.21	23.913	7885.82	29.7297	12177.5	21.1538	6561.83	32.3529	10804.5	25.5814	11178	25	7171.2	14.1026	5548.34	22.9167	13763	33.3333	15420.9	26.8293	13876.6	24.4444	11460.8	21.1538	8059.11	25	6641.92	33.3333	11168.2	16.4179	5570.05	22	6959.16	36.6667	10465.8	34.375	16932.8	12.9412	5906.51	30.5556	12208.7	40.7407	12490.7	22.449	9882.42	32.3529	10574.8	23.4043	8824.62	23.913
1.32	26.087	8131.08	32.4324	11664.5	23.0769	6766.41	35.2941	12782.4	27.907	10610.1	27.2727	7131.52	15.3846	5276.09	25	12272	36.3636	16082.3	29.2683	12387.6	26.6667	12491.2	23.0769	7572.63	27.2727	6698.88	36.3636	11298.9	17.9104	5103.51	24	6095.57	40	11569.7	37.5	16770.7	14.1176	5099.77	33.3333	11178.2	44.4444	13011.8	24.4898	8852.31	35.2941	9266.78	25.5319	8585.11	26.087
1.43	28.2609	7957.78	35.1351	10403.8	25	7206	38.2353	13963.7	30.2326	10462	29.5455	7162.88	16.6667	5363.13	27.0833	11746.4	39.3939	16758.9	31.7073	11490.5	28.8889	12361.6	25	7361.37	29.5455	7134.08	39.3939	11428	19.403	4824.42	26	5736.2	43.3333	11880.6	40.625	17665.2	15.2941	4816.4	36.1111	10964.2	48.1481	13995.3	26.5306	9595.05	38.2353	8114.99	27.6596	8265.27	28.2609
1.54	30.4348	7378.86	37.8378	8539.52	26.9231	7011.75	41.1765	13639.8	32.5581	9021.9	31.8182	7447.68	17.9487	5539.74	29.1667	11154.4	42.4242	16119.6	34.1463	10457.8	31.1111	12548.6	26.9231	7463.82	31.8182	7438.08	42.4242	11459.2	20.8955	4675.46	28	5722.24	46.6667	12091.8	43.75	19258.5	16.4706	5002.75	38.8889	10886.5	51.8519	13263.5	28.5714	10194	41.1765	7779.3	29.7872	8501.89	30.4348
1.65	32.6087	7359.72	40.5405	7926.4	28.8462	5651.61	44.1176	12028.4	34.8837	8381.38	34.0909	8768	19.2308	5378.28	31.25	11545.7	45.4545	15811.8	36.5854	10425.4	33.3333	12555.2	28.8462	7146.94	34.0909	7779.84	45.4545	11996.4	22.3881	4586.71	30	5891.67	50	11769.8	46.875	19077.6	17.6471	4843.31	41.6667	11664	55.5556	12183.4	30.6122	10656.4	44.1176	7489.51	31.9149	8781.36	32.6087
1.76	34.7826	7846.61	43.2432	8456.96	30.7692	5061.93	47.0588	10500.5	37.2093	8220.91	36.3636	9255.76	20.5128	5329.81	33.3333	11137.4	48.4848	16869.8	39.0244	10550.9	35.5556	13294.8	30.7692	7335.26	36.3636	8638.08	48.4848	12091.4	23.8806	4584.31	32	5797.58	53.3333	11332.3	50	18729.1	18.8235	4454.63	44.4444	11363.7	59.2593	11497.8	32.6531	10271.4	47.0588	7386.31	34.0426	8558.92	34.7826
1.87	36.9565	8739.42	45.9459	9048.32	32.6923	4970.12	50	9957.74	39.5349	8686.11	38.6364	9232.79	21.7949	5575.12	35.4167	10434.3	51.5152	18258	41.4634	10674.9	37.7778	13109.1	32.6923	7758.61	38.6364	8819.2	51.5152	11386.5	25.3731	4652.82	34	6474.57	56.6667	10767.7	53.125	17865.7	20	4474.13	47.2222	10964.4	62.963	11437.4	34.6939	8977.5	50	7343.26	36.1702	8263	36.9565
1.98	39.1304	9423.28	48.6486	10153.4	34.6154	5276.77	52.9412	9683.34	41.8605	9122.25	40.9091	8785.56	23.0769	5752.01	37.5	10320.4	54.5455	19922.4	43.9024	10511.6	40	12742.2	34.6154	8922.9	40.9091	8099.72	54.5455	10774.6	26.8657	5156.2	36	6850.35	60	11146.7	56.25	17153.5	21.1765	4700.2	50	11132.3	66.6667	12550.5	36.7347	8651.42	52.9412	7673.02	38.2979	7713.97	39.1304
2.09	41.3043	9576.38	51.3514	9695.36	36.5385	5747.31	55.8824	10106.4	44.186	8984.29	43.1818	8703.7	24.359	5975.84	39.5833	10824	57.5758	19536.3	46.3415	9804.23	42.2222	12814.4	36.5385	10103.4	43.1818	6981.22	57.5758	10314.4	28.3582	5218.05	38	6738.01	63.3333	11120.1	59.375	18096.3	22.3529	5006.41	52.7778	11375.2	70.3704	13861.2	38.7755	9109.37	55.8824	8458.55	40.4255	7125.2	41.3043
2.2	43.4783	9351.96	54.0541	10536.9	38.4615	6316.05	58.8235	10519	46.5116	8705.8	45.4545	7741.01	25.641	6246.93	41.6667	11453.3	60.6061	20445.9	48.7805	10187.7	44.4444	13639.4	38.4615	10474.5	45.4545	6420.09	60.6061	9878.2	29.8507	5866.17	40	6048.46	66.6667	11984.8	62.5	17893	23.5294	5386.02	55.5556	12115	74.0741	14381.5	40.8163	9290.33	58.8235	9609.05	42.5532	7477.67	43.4783
2.31	45.6522	9029.2	56.7568	11834.6	40.3846	5992.94	61.7647	11091.3	48.8372	8683.88	47.7273	6542.39	26.9231	6155.64	43.75	11626.1	63.6364	18306.8	51.2195	11097.9	46.6667	13497.8	40.3846	10042.3	47.7273	6269.44	63.6364	9461.3	31.3433	6107.05	42	5544.52	70	11943.6	65.625	17494.9	24.7059	5090.89	58.3333	13833.1	77.7778	15412.8	42.8571	9689.32	61.7647	10361.9	44.6809	8494.16	45.6522
2.42	47.8261	8974.09	59.4595	12825	42.3077	5688.79	64.7059	11951.4	51.1628	8783.8	50	6129.54	28.2051	6047.33	45.8333	12541.6	66.6667	18232.2	53.6585	11611.2	48.8889	14132.9	42.3077	10042.6	50	6643.4	66.6667	9233.09	32.8358	6571.65	44	5490.41	73.3333	11662.1	68.75	17053.4	25.8824	5063.03	61.1111	12960.3	81.4815	17117	44.898	8727.73	64.7059	10108.2	46.8085	9386.05	47.8261
2.53	50	8332.28	62.1622	14246.7	44.2308	5060.07	67.6471	10834.4	53.4884	8791.35	52.2727	6120.15	29.4872	5290.81	47.9167	13400.2	69.697	18579.3	56.0976	11983.7	51.1111	14239.2	44.2308	9984.95	52.2727	7127.21	69.697	10073.7	34.3284	6781.84	46	5295.37	76.6667	11103.5	71.875	16607.1	27.0588	5042.82	63.8889	11095.6	85.1852	17439	46.9388	7853.2	67.6471	10705.1	48.9362	9507.11	50
2.64	52.1739	7922.67	64.8649	14485.5	46.1538	5111.29	70.5882	9090.76	55.814	9530.09	54.5455	6226.5	30.7692	5097.42	50	13201.1	72.7273	18515.6	58.5366	12804.7	53.3333	13835.6	46.1538	10264.2	54.5455	7740.8	72.7273	10577.6	35.8209	5950.7	48	5842.26	80	11434.8	75	16442.1	28.2353	4810.76	66.6667	10652.3	88.8889	16913.9	48.9796	7758.14	70.5882	9870.56	51.0638	8283.4	52.1739
2.75	54.3478	8702.64	67.5676	14651.2	48.0769	5546.17	73.5294	8684.8	58.1395	9458.55	56.8182	6265.61	32.0513	5067.27	52.0833	13239.9	75.7576	16943.7	60.9756	12524.7	55.5556	13914.1	48.0769	10046.2	56.8182	7479.32	75.7576	11922.2	37.3134	5336.33	50	6435.35	83.3333	11390.4	78.125	15644.7	29.4118	4976.97	69.4444	10019.2	92.5926	16132.4	51.0204	8320.17	73.5294	10021.6	53.1915	7631.19	54.3478
2.86	56.5217	10334	70.2703	14640.4	50	6880.58	76.4706	9036.54	60.4651	8997.84	59.0909	6993.82	33.3333	4949.64	54.1667	12026.8	78.7879	15847.8	63.4146	12267.7	57.7778	13067.4	50	9564.55	59.0909	7060.93	78.7879	13088.1	38.806	5348.94	52	7325.57	86.6667	11310.3	81.25	15458	30.5882	5133.96	72.2222	9460.25	96.2963	15191.9	53.0612	9354.28	76.4706	10192	55.3191	7513.98	56.5217
2.97	58.6957	11767.9	72.973	13835.3	51.9231	7874.83	79.4118	10207.4	62.7907	8891.52	61.3636	7567.58	34.6154	4875.83	56.25	10838.9	81.8182	14687.4	65.8537	11513	60	12357	51.9231	9371.26	61.3636	6879.99	81.8182	12682	40.2985	5332.16	54	7513.38	90	12016.5	84.375	14976.2	31.7647	5417.72	75	8519.81	100	14506.8	55.102	9992.89	79.4118	9820.02	57.4468	7335.06	58.6957
3.08	60.8696	11911.8	75.6757	13423.3	53.8462	8270.38	82.3529	12259.5	65.1163	9184.95	63.6364	8644.49	35.8974	4793.81	58.3333	10279.4	84.8485	13672.6	68.2927	10992.4	62.2222	11652.6	53.8462	9358.38	63.6364	6864.03	84.8485	11950.9	41.791	5474.56	56	7256.89	93.3333	11919.2	87.5	15284.4	32.9412	5469.22	77.7778	8175.6			57.1429	10039.2	82.3529	10581	59.5745	7956.26	60.8696
3.19	63.0435	10838.4	78.3784	13595	55.7692	7728.14	85.2941	12981.7	67.4419	9623.84	65.9091	9745.59	37.1795	4577.06	60.4167	9566	87.8788	13599.9	70.7317	10362.4	64.4444	10907	55.7692	8725.92	65.9091	7118.35	87.8788	11849.4	43.2836	5471.3	58	6790.94	96.6667	12240.3	90.625	15290.1	34.1176	6347.7	80.5556	7895.44			59.1837	8901.45	85.2941	11212.2	61.7021	7891.31	63.0435
3.3	65.2174	10949.3	81.0811	12785.3	57.6923	7547.13	88.2353	12965.6	69.7674	9967.61	68.1818	10464.4	38.4615	4845.3	62.5	9200.5	90.9091	13014.1	73.1707	10141.1	66.6667	9778.49	57.6923	8376.85	68.1818	7394.45	90.9091	11899.2	44.7761	5376.07	60	6357.73	100	11569	93.75	15996.1	35.2941	5765.92	83.3333	7742.14			61.2245	8345.28	88.2353	10894.4	63.8298	8161.34	65.2174
3.41	67.3913	11179.1	83.7838	11769.4	59.6154	6918.75	91.1765	11341.6	72.093	9849.02	70.4545	10240.5	39.7436	5128.83	64.5833	9101.87	93.9394	12363	75.6098	10454.5	68.8889	9147.14	59.6154	8217.14	70.4545	7288.66	93.9394	12479.5	46.2687	5495.7	62	5889.39			96.875	15756	36.4706	5302.36	86.1111	7943.29			63.2653	8117.62	91.1765	10353.1	65.9574	8261.13	67.3913
3.52	69.5652	10827.2	86.4865	11158.3	61.5385	7277.96	94.1176	9239.81	74.4186	10250.3	72.7273	9855.61	41.0256	5810.98	66.6667	8457.85	96.9697	12538.6	78.0488	10704.4	71.1111	8893.96	61.5385	7838.28	72.7273	7237.09	96.9697	13219.6	47.7612	5589.82	64	5780.42			100	15029.8	37.6471	5378.17	88.8889	8629.26			65.3061	8929.99	94.1176	9141.13	68.0851	9390.83	69.5652
3.63	71.7391	8729.6	89.1892	10270.2	63.4615	7804.41	97.0588	8307.76	76.7442	9744.49	75	9935.1	42.3077	6109.54	68.75	8301.01	100	13466.9	80.4878	11096.3	73.3333	8562.65	63.4615	8180.32	75	7360.8	100	13694.1	49.2537	5404.91	66	5770.42					38.8235	5679.93	91.6667	8383.7			67.3469	9589.41	97.0588	8267.62	70.2128	10068.7	71.7391
3.74	73.913	7637.76	91.8919	9685.61	65.3846	8713.88	100	7717.83	79.0698	9536.1	77.2727	9108.94	43.5897	6577.26	70.8333	8360.14			82.9268	11823.4	75.5556	8839.59	65.3846	8231.78	77.2727	7082.4			50.7463	5873.39	68	6035.53					40	5920.67	94.4444	8617.91			69.3878	10244.5	100	7430.62	72.3404	10459	73.913
3.85	76.087	7936.96	94.5946	10096.8	67.3077	8850.43			81.3953	9330.41	79.5455	7789.14	44.8718	6215.16	72.9167	8714.31			85.3659	12131.3	77.7778	8930.95	67.3077	8188.45	79.5455	6680.8			52.2388	6467.5	70	6131.49					41.1765	5375.66	97.2222	8515.9			71.4286	10190.9			74.4681	10572.6	76.087
3.96	78.2609	8774.08	97.2973	10474.6	69.2308	8567.23			83.7209	9505.76	81.8182	7635.02	46.1538	5531.42	75	9545.51			87.8049	11847.6	80	9122.74	69.2308	8760.1	81.8182	6635.2			53.7313	6974.4	72	6513.88					42.3529	5546.96	100	9047.63			73.4694	9975.23			76.5957	10490	78.2609
4.07	80.4348	9079.68	100	10303.9	71.1538	8296.8			86.0465	9743.94	84.0909	7682.91	47.4359	5005.58	77.0833	8518.83			90.2439	10899.8	82.2222	9667.89	71.1538	9906.26	84.0909	6372			55.2239	7076.06	74	7040.17					43.5294	5590.87					75.5102	9401.8			78.7234	9960.32	80.4348
4.18	82.6087	9456			73.0769	8205.29			88.3721	10015.4	86.3636	9508.52	48.7179	4796.39	79.1667	7610.9			92.6829	10376.7	84.4444	11029.2	73.0769	11107.5	86.3636	6051.2			56.7164	6976.51	76	6931.82					44.7059	6149.53					77.551	8611.56			80.8511	9371.14	82.6087
4.29	84.7826	9438.6			75	8016.69			90.6977	10279.1	88.6364	10872.4	50	4728.17	81.25	7459.11			95.122	9808.15	86.6667	11417.3	75	11130.9	88.6364	5830.4			58.209	6720.44	78	6997.03					45.8824	6558.54					79.5918	9878.47			82.9787	9177	84.7826
4.4	86.9565	8581.47			76.9231	7741.86			93.0233	10251.5	90.9091	11959.8	51.2821	4840.17	83.3333	7754.66			97.561	9890.74	88.8889	10898.9	76.9231	10852.2	90.9091	6025.6			59.7015	5996.03	80	6759.17					47.0588	5833.65					81.6327	9888.99			85.1064	8799.2	86.9565
4.51	89.1304	8178.38			78.8462	7525.32			95.3488	9540.56	93.1818	12208	52.5641	4784.48	85.4167	8070.24			100	9886.02	91.1111	9129.75	78.8462	10964.2	93.1818	6907.2			61.194	5748.88	82	6228.87					48.2353	5791.31					83.6735	9571.86			87.234	8374.32	89.1304
4.62	91.3043	7974.15			80.7692	7554.13			97.6744	9017.62	95.4545	11618.5	53.8462	5018.94	87.5	7622.25					93.3333	7904.1	80.7692	10696.3	95.4545	7880			62.6866	5869.21	84	6147.35					49.4118	5015.51					85.7143	9914.86			89.3617	8648.93	91.3043
4.73	93.4783	7131.26			82.6923	7305.11			100	8096.86	97.7273	11295.2	55.1282	5045.96	89.5833	7983.52					95.5556	7409.91	82.6923	11183.2	97.7273	8125.6			64.1791	5990.12	86	6244					50.5882	4867					87.7551	9882.56			91.4894	8536.12	93.4783
4.84	95.6522	6851.25			84.6154	6390.41					100	9881.57	56.4103	4840.29	91.6667	8558.44					97.7778	7200.89	84.6154	11377	100	8322.4			65.6716	6059.4	88	6226.88					51.7647	5330.69					89.7959	9734.72			93.617	7562.25	95.6522
4.95	97.8261	6686.05			86.5385	5698.2							57.6923	4617.94	93.75	8747.12					100	6786.17	86.5385	10621.3					67.1642	6311.62	90	5537.12					52.9412	5846.47					91.8367	8859.84			95.7447	7370.5	97.8261
5.06	100	6502.88			88.4615	5400.92							58.9744	4482.21	95.8333	8620							88.4615	9154.79					68.6567	6600.58	92	5618.24					54.1176	6311.44					93.8776	8137.28			97.8723	6842.03	100
5.17					90.3846	5202.4							60.2564	4316.73	97.9167	8760.68							90.3846	9033.94					70.1493	6726.83	94	6213.6					55.2941	5920.42					95.9184	8262.08			100	6678.35
5.28					92.3077	5114.54							61.5385	4224.75	100	7533.06							92.3077	8818.57					71.6418	7072.16	96	6218.08					56.4706	5454.38					97.9592	7612.16
5.39					94.2308	5279.44							62.8205	4335.02									94.2308	9506.27					73.1343	6535.26	98	6478.56					57.6471	5183.7					100	7445.44
5.5					96.1538	5543.66							64.1026	4521.97									96.1538	10279.4					74.6269	6500.3	100	6683.52					58.8235	5085.22
5.61					98.0769	5860.3							65.3846	4615.06									98.0769	10796.4					76.1194	7010.99							60	5074.5
5.72					100	6246.51							66.6667	4445.66									100	11109.1					77.6119	7406.39							61.1765	5124.41
5.83													67.9487	4569.59															79.1045	6935.76							62.3529	5231.37
5.94													69.2308	4999.58															80.597	6675.77							63.5294	5256.02
6.05													70.5128	5195.58															82.0896	6171.47							64.7059	5048.87
6.16													71.7949	5318.43															83.5821	5721.44							65.8824	5104.3
6.27													73.0769	5489.75															85.0746	6103.57							67.0588	5217.48
6.38													74.359	5754.64															86.5672	6108.57							68.2353	5422.52
6.49													75.641	5710.03															88.0597	6392.53							69.4118	5359.9
6.6													76.9231	5308.1															89.5522	6594.48							70.5882	5224.98
6.71													78.2051	5444.78															91.0448	6702.68							71.7647	5222.62
6.82													79.4872	6145.02															92.5373	7008.64							72.9412	5163.46
6.93													80.7692	6610.49															94.0299	7663.04							74.1176	5028.23
7.04													82.0513	6743.76															95.5224	7590.08							75.2941	5322.95
7.15													83.3333	6308.7															97.0149	7272.32							76.4706	5434.64
7.26													84.6154	6135.77															98.5075	6879.36							77.6471	5398.31
7.37													85.8974	6460.53															100	6122.88							78.8235	5254.24
7.48													87.1795	6745.78																							80	5125.36
7.59													88.4615	6773																							81.1765	5250.06
7.7													89.7436	6316.06																							82.3529	5480.25
7.81													91.0256	6134.49																							83.5294	5535.13
7.92													92.3077	6311.2																							84.7059	5738.8
8.03													93.5897	6258.97																							85.8824	5972.56
8.14													94.8718	6216.54																							87.0588	5641.55
8.25													96.1538	6668.53																							88.2353	5290.24
8.36													97.4359	7024.79																							89.4118	5038.54
8.47													98.7179	6719.07																							90.5882	5552.37
8.58													100	6493.74																							91.7647	5769.49
8.69																																					92.9412	5934.49
8.8																																					94.1176	5948.21
8.91																																					95.2941	5800.72
9.02																																					96.4706	5293.69
9.13																																					97.6471	5573.88
9.24																																					98.8235	5880.85
9.35																																					100	6154.91
	0		0		0		0		0		0		0		0		0		0		0		0		0		0		0		0		0		0		0		0		0		0		0		0		0
	5	13856.1	5	20091.7	5	12476.9	5	13510.9	5	12744.9	5	9151.15	5	8436.84	5	20868.8	5	24226	5	24940.7	5	18447	5	15866.6	5	10546.7	5	16581.8	5	7460.06	5	10465.2	5	17922.6	5	32459.1	5	10832.7	5	19739.2	5	20388.1	5	19172.7	5	16315.4	5	16174	5
	10	12258.8	10	17872.4	10	12869.2	10	12277.6	10	11488.4	10	9530.56	10	6439.27	10	18243	10	25936.9	10	21687.6	10	16634.9	10	17685	10	9427.54	10	16067.5	10	6808.68	10	9189.41	10	16526.3	10	31518.1	10	9146.88	10	21072.2	10	20377.2	10	18758.6	10	13682.5	10	13435.4	10
	15	9319.42	15	13576.1	15	11564.4	15	10306.2	15	9982.29	15	8245.12	15	5520.92	15	15167.6	15	23336.7	15	16930.2	15	14215.1	15	13468	15	7438.35	15	16101.1	15	6261.54	15	7473.19	15	15786.3	15	29742.2	15	6205.34	15	17734.6	15	18145.7	15	13111.9	15	9884.49	15	10370.3	15
	20	8152.51	20	12156.5	20	7581.34	20	9421.39	20	10031.7	20	7512.64	20	5389.31	20	14379.8	20	19610.2	20	14912.6	20	12232.7	20	9078.04	20	6298.89	20	16053.4	20	5165.99	20	6949.98	20	13541.9	20	25752.6	20	4718.24	20	14553.5	20	15289.8	20	11165.5	20	8300.11	20	7900.65	20
	25	7814.92	25	11836.8	25	6844.75	25	8714.64	25	10716.5	25	7076.48	25	5658.2	25	13778.3	25	15578.3	25	14928.4	25	11322.5	25	7664.37	25	6161.92	25	13619.6	25	4615.49	25	6653.76	25	12248.9	25	19302.1	25	4931.53	25	13563.5	25	13186.3	25	9795.46	25	8097.82	25	8359.58	25
	30	8044.43	30	12338.1	30	6623.12	30	9256.73	30	10894.1	30	7155.2	30	5935.18	30	11724.3	30	14505.4	30	13132.1	30	12426.4	30	7324.04	30	6824.96	30	12392.5	30	5223.31	30	5783.37	30	10993.4	30	18397.8	30	4973.39	30	13331.9	30	10693.9	30	9894.53	30	9955.99	30	8450.76	30
	35	7528.4	35	11664.5	35	5102.94	35	10804.5	35	9288.42	35	8107.84	35	4997.54	35	11341.6	35	15037	35	10974.2	35	12551.9	35	8005.59	35	7608.96	35	11201.2	35	6486.85	35	6054.61	35	10390.6	35	17066.6	35	5592.15	35	11693.5	35	10790	35	9968.44	35	10574.8	35	8670.14	35
	40	9081.35	40	9471.68	40	6031.68	40	13373	40	8453.51	40	9244.28	40	4836.25	40	10526.2	40	16420.6	40	10488.1	40	13048.7	40	10288.9	40	8728.64	40	11363.5	40	5545.32	40	6545.61	40	11017.8	40	16770.7	40	5609.41	40	10925.4	40	11830.7	40	8880.4	40	8690.89	40	7988.49	40
	45	9464.17	45	8191.68	45	5580.6	45	12834.1	45	9053.27	45	8744.63	45	6178.23	45	11539.7	45	16119.6	45	10593.3	45	13065.4	45	10023.3	45	7540.47	45	11459.2	45	5413.52	45	5694.46	45	11725.2	45	18461.9	45	5716.74	45	11513.9	45	12751.2	45	9235.79	45	7634.41	45	7699.01	45
	50	8778.52	50	9600.87	50	5846.01	50	10229.1	50	8694.84	50	6804.31	50	5015.39	50	13047.6	50	16340.8	50	9995.98	50	13815.3	50	9958.33	50	6444.31	50	12043.9	50	5496.81	50	5857.66	50	11930.8	50	18903.3	50	5799.75	50	11048.4	50	13995.3	50	7805.67	50	7364.78	50	9446.58	50
	55	8319.2	55	10116.1	55	7675.26	55	9820.54	55	8787.58	55	6158.73	55	4842.94	55	12822.6	55	19090.2	55	11354.5	55	14037.4	55	9431.4	55	7170.47	55	11080.5	55	6438.43	55	7091.43	55	11551	55	18297.4	55	5588.9	55	11253.8	55	13263.5	55	8837.23	55	7508.14	55	7957.3	55
	60	11051	60	12329.8	60	7398.01	60	10312.7	60	9494.32	60	6629.72	60	4746.6	60	10559.2	60	19536.3	60	12394.2	60	13112.8	60	8439.97	60	7270.12	60	10314.4	60	6692.26	60	6801.85	60	10957.2	60	17624.9	60	5343.64	60	12974.1	60	11840.6	60	9644.51	60	9033.8	60	7601.77	60
	65	11375.1	65	14366.1	65	7541.18	65	11521.4	65	8944.68	65	8106.03	65	4349.62	65	9289.46	65	19376.4	65	12396.2	65	11638.9	65	8009.3	65	6872.01	65	9669.75	65	5869.4	65	6009.18	65	11133.4	65	17893	65	5147.03	65	12027.9	65	11437.4	65	8231.45	65	10235	65	8026.33	65
	70	10985.2	70	14651.2	70	8710.51	70	10834.4	70	9592.13	70	10105	70	4657.47	70	8379.43	70	18405.7	70	11252.7	70	9462.81	70	8393.44	70	7256.4	70	9653.42	70	6323.87	70	5979.15	70	11964.2	70	17274.2	70	5276.05	70	10335.7	70	12550.5	70	9587.96	70	10705.1	70	8825.98	70
	75	8183.68	75	14237.9	75	8172.93	75	8887.78	75	10049.7	75	10010.4	75	5439.6	75	8873.32	75	18515.6	75	10251.8	75	8728.31	75	10714.9	75	7295.52	75	10577.6	75	6708.64	75	6561.85	75	11802.9	75	16524.6	75	5159.82	75	8990.03	75	14121.4	75	10083.1	75	9946.08	75	10366.8	75
	80	8355.52	80	13509.1	80	7761.29	80	9621.97	80	9640.3	80	8944.39	80	5651.98	80	8558.41	80	16395.7	80	10579.4	80	8964.43	80	10982.4	80	7041.33	80	12505.2	80	7117.71	80	6896.01	80	11269.1	80	16043.4	80	5307.1	80	8347.7	80	15412.8	80	9297.28	80	10006	80	10225.2	80
	85	9324.76	85	12277.4	85	7083.22	85	12259.5	85	9418.08	85	7658.97	85	6449.68	85	7606.89	85	14180	85	11459.9	85	9939.94	85	11085.5	85	6503.6	85	12316.5	85	6189.56	85	6378.46	85	11412.6	85	15217.1	85	5425.92	85	7818.79	85	17117	85	9730.42	85	10581	85	9274.07	85
	90	8379.92	90	10714.2	90	5549.56	90	12973.7	90	9879.65	90	10190.4	90	6573.84	90	7892	90	13599.9	90	11989.5	90	11158.1	90	9888.05	90	5940.8	90	11849.4	90	6299.79	90	6002.67	90	11663.4	90	15284.4	90	5485.72	90	8286.27	90	17176.4	90	9844.05	90	11053.3	90	8607.48	90
	95	7552.7	95	9891.22	95	5198.79	95	10290.7	95	10265.3	95	12083.9	95	6230.3	95	8652.78	95	12688.6	95	10638.3	95	8516.92	95	9119.59	95	6466.4	95	12189.4	95	7124.79	95	5789.65	95	11967.9	95	15643.1	95	5801.14	95	8500.81	95	16132.4	95	8498.56	95	9747.1	95	8049.19	95
	100	6680.06	100	10389.2	100	5883.49	100	8012.8	100	8885.01	100	10931.8	100	6726.53	100	8304.58	100	13002.7	100	9861.64	100	7132.32	100	10728.3	100	8109.33	100	13456.8	100	6966.16	100	6460.05	100	11904.6	100	15392.9	100	5740.81	100	8781.76	100	14849.3	100	7773.23	100	7849.12	100	6963.63	100
[truncated: 35 more columns]

## Sheet: IF Normalised
	0		0		0		0		0		0		0		0		0		0		0		0		0		0		0		0		0		0		0		0		0		0		0		0		0
	5	13856.1	5	20091.7	5	12476.9	5	13510.9	5	12744.9	5	9151.15	5	8436.84	5	20868.8	5	24226	5	24940.7	5	18447	5	15866.6	5	10546.7	5	16581.8	5	7460.06	5	10465.2	5	17922.6	5	32459.1	5	10832.7	5	19739.2	5	20388.1	5	19172.7	5	16315.4	5	16174	5
	10	12258.8	10	17872.4	10	12869.2	10	12277.6	10	11488.4	10	9530.56	10	6439.27	10	18243	10	25936.9	10	21687.6	10	16634.9	10	17685	10	9427.54	10	16067.5	10	6808.68	10	9189.41	10	16526.3	10	31518.1	10	9146.88	10	21072.2	10	20377.2	10	18758.6	10	13682.5	10	13435.4	10
	15	9319.42	15	13576.1	15	11564.4	15	10306.2	15	9982.29	15	8245.12	15	5520.92	15	15167.6	15	23336.7	15	16930.2	15	14215.1	15	13468	15	7438.35	15	16101.1	15	6261.54	15	7473.19	15	15786.3	15	29742.2	15	6205.34	15	17734.6	15	18145.7	15	13111.9	15	9884.49	15	10370.3	15
	20	8152.51	20	12156.5	20	7581.34	20	9421.39	20	10031.7	20	7512.64	20	5389.31	20	14379.8	20	19610.2	20	14912.6	20	12232.7	20	9078.04	20	6298.89	20	16053.4	20	5165.99	20	6949.98	20	13541.9	20	25752.6	20	4718.24	20	14553.5	20	15289.8	20	11165.5	20	8300.11	20	7900.65	20
	25	7814.92	25	11836.8	25	6844.75	25	8714.64	25	10716.5	25	7076.48	25	5658.2	25	13778.3	25	15578.3	25	14928.4	25	11322.5	25	7664.37	25	6161.92	25	13619.6	25	4615.49	25	6653.76	25	12248.9	25	19302.1	25	4931.53	25	13563.5	25	13186.3	25	9795.46	25	8097.82	25	8359.58	25
	30	8044.43	30	12338.1	30	6623.12	30	9256.73	30	10894.1	30	7155.2	30	5935.18	30	11724.3	30	14505.4	30	13132.1	30	12426.4	30	7324.04	30	6824.96	30	12392.5	30	5223.31	30	5783.37	30	10993.4	30	18397.8	30	4973.39	30	13331.9	30	10693.9	30	9894.53	30	9955.99	30	8450.76	30
	35	7528.4	35	11664.5	35	5102.94	35	10804.5	35	9288.42	35	8107.84	35	4997.54	35	11341.6	35	15037	35	10974.2	35	12551.9	35	8005.59	35	7608.96	35	11201.2	35	6486.85	35	6054.61	35	10390.6	35	17066.6	35	5592.15	35	11693.5	35	10790	35	9968.44	35	10574.8	35	8670.14	35
	40	9081.35	40	9471.68	40	6031.68	40	13373	40	8453.51	40	9244.28	40	4836.25	40	10526.2	40	16420.6	40	10488.1	40	13048.7	40	10288.9	40	8728.64	40	11363.5	40	5545.32	40	6545.61	40	11017.8	40	16770.7	40	5609.41	40	10925.4	40	11830.7	40	8880.4	40	8690.89	40	7988.49	40
	45	9464.17	45	8191.68	45	5580.6	45	12834.1	45	9053.27	45	8744.63	45	6178.23	45	11539.7	45	16119.6	45	10593.3	45	13065.4	45	10023.3	45	7540.47	45	11459.2	45	5413.52	45	5694.46	45	11725.2	45	18461.9	45	5716.74	45	11513.9	45	12751.2	45	9235.79	45	7634.41	45	7699.01	45
	50	8778.52	50	9600.87	50	5846.01	50	10229.1	50	8694.84	50	6804.31	50	5015.39	50	13047.6	50	16340.8	50	9995.98	50	13815.3	50	9958.33	50	6444.31	50	12043.9	50	5496.81	50	5857.66	50	11930.8	50	18903.3	50	5799.75	50	11048.4	50	13995.3	50	7805.67	50	7364.78	50	9446.58	50
	55	8319.2	55	10116.1	55	7675.26	55	9820.54	55	8787.58	55	6158.73	55	4842.94	55	12822.6	55	19090.2	55	11354.5	55	14037.4	55	9431.4	55	7170.47	55	11080.5	55	6438.43	55	7091.43	55	11551	55	18297.4	55	5588.9	55	11253.8	55	13263.5	55	8837.23	55	7508.14	55	7957.3	55
	60	11051	60	12329.8	60	7398.01	60	10312.7	60	9494.32	60	6629.72	60	4746.6	60	10559.2	60	19536.3	60	12394.2	60	13112.8	60	8439.97	60	7270.12	60	10314.4	60	6692.26	60	6801.85	60	10957.2	60	17624.9	60	5343.64	60	12974.1	60	11840.6	60	9644.51	60	9033.8	60	7601.77	60
	65	11375.1	65	14366.1	65	7541.18	65	11521.4	65	8944.68	65	8106.03	65	4349.62	65	9289.46	65	19376.4	65	12396.2	65	11638.9	65	8009.3	65	6872.01	65	9669.75	65	5869.4	65	6009.18	65	11133.4	65	17893	65	5147.03	65	12027.9	65	11437.4	65	8231.45	65	10235	65	8026.33	65
	70	10985.2	70	14651.2	70	8710.51	70	10834.4	70	9592.13	70	10105	70	4657.47	70	8379.43	70	18405.7	70	11252.7	70	9462.81	70	8393.44	70	7256.4	70	9653.42	70	6323.87	70	5979.15	70	11964.2	70	17274.2	70	5276.05	70	10335.7	70	12550.5	70	9587.96	70	10705.1	70	8825.98	70
	75	8183.68	75	14237.9	75	8172.93	75	8887.78	75	10049.7	75	10010.4	75	5439.6	75	8873.32	75	18515.6	75	10251.8	75	8728.31	75	10714.9	75	7295.52	75	10577.6	75	6708.64	75	6561.85	75	11802.9	75	16524.6	75	5159.82	75	8990.03	75	14121.4	75	10083.1	75	9946.08	75	10366.8	75
	80	8355.52	80	13509.1	80	7761.29	80	9621.97	80	9640.3	80	8944.39	80	5651.98	80	8558.41	80	16395.7	80	10579.4	80	8964.43	80	10982.4	80	7041.33	80	12505.2	80	7117.71	80	6896.01	80	11269.1	80	16043.4	80	5307.1	80	8347.7	80	15412.8	80	9297.28	80	10006	80	10225.2	80
	85	9324.76	85	12277.4	85	7083.22	85	12259.5	85	9418.08	85	7658.97	85	6449.68	85	7606.89	85	14180	85	11459.9	85	9939.94	85	11085.5	85	6503.6	85	12316.5	85	6189.56	85	6378.46	85	11412.6	85	15217.1	85	5425.92	85	7818.79	85	17117	85	9730.42	85	10581	85	9274.07	85
	90	8379.92	90	10714.2	90	5549.56	90	12973.7	90	9879.65	90	10190.4	90	6573.84	90	7892	90	13599.9	90	11989.5	90	11158.1	90	9888.05	90	5940.8	90	11849.4	90	6299.79	90	6002.67	90	11663.4	90	15284.4	90	5485.72	90	8286.27	90	17176.4	90	9844.05	90	11053.3	90	8607.48	90
	95	7552.7	95	9891.22	95	5198.79	95	10290.7	95	10265.3	95	12083.9	95	6230.3	95	8652.78	95	12688.6	95	10638.3	95	8516.92	95	9119.59	95	6466.4	95	12189.4	95	7124.79	95	5789.65	95	11967.9	95	15643.1	95	5801.14	95	8500.81	95	16132.4	95	8498.56	95	9747.1	95	8049.19	95
	100	6680.06	100	10389.2	100	5883.49	100	8012.8	100	8885.01	100	10931.8	100	6726.53	100	8304.58	100	13002.7	100	9861.64	100	7132.32	100	10728.3	100	8109.33	100	13456.8	100	6966.16	100	6460.05	100	11904.6	100	15392.9	100	5740.81	100	8781.76	100	14849.3	100	7773.23	100	7849.12	100	6963.63	100
	0		0		0		0		0		0		0		0		0		0		0		0		0		0		0		0		0		0		0		0		0		0		0		0		0
	5	1	5	1	5	1	5	1	5	1	5	1	5	1	5	1	5	1	5	1	5	1	5	1	5	1	5	1	5	1	5	1	5	1	5	1	5	1	5	1	5	1	5	1	5	1	5	1	5
	10	0.884723	10	0.88954	10	1.03144	10	0.908721	10	0.901405	10	1.04146	10	0.763232	10	0.874174	10	1.07062	10	0.86957	10	0.901766	10	1.1146	10	0.893886	10	0.968988	10	0.912685	10	0.878092	10	0.922095	10	0.971008	10	0.844378	10	1.06753	10	0.999465	10	0.978399	10	0.838625	10	0.830683	10
	15	0.672586	15	0.675706	15	0.926865	15	0.762804	15	0.783236	15	0.900993	15	0.654382	15	0.726806	15	0.963295	15	0.678818	15	0.77059	15	0.848825	15	0.705279	15	0.971014	15	0.839342	15	0.7141	15	0.880802	15	0.916297	15	0.572835	15	0.898446	15	0.890012	15	0.683884	15	0.605838	15	0.641172	15
	20	0.58837	20	0.60505	20	0.607628	20	0.697319	20	0.787114	20	0.820951	20	0.638783	20	0.689056	20	0.809469	20	0.597925	20	0.663126	20	0.572147	20	0.597239	20	0.968136	20	0.692487	20	0.664104	20	0.755575	20	0.793386	20	0.435556	20	0.737288	20	0.749935	20	0.582364	20	0.508729	20	0.488479	20
	25	0.564006	25	0.589141	25	0.548592	25	0.645009	25	0.840842	25	0.773289	25	0.670653	25	0.660233	25	0.643041	25	0.598557	25	0.613787	25	0.48305	25	0.584252	25	0.821362	25	0.618694	25	0.635799	25	0.683432	25	0.594658	25	0.455246	25	0.687136	25	0.646761	25	0.510906	25	0.49633	25	0.516854	25
	30	0.58057	30	0.614091	30	0.530829	30	0.685132	30	0.854774	30	0.781891	30	0.703483	30	0.561808	30	0.598755	30	0.526533	30	0.673626	30	0.461601	30	0.647119	30	0.747358	30	0.70017	30	0.552629	30	0.613379	30	0.5668	30	0.45911	30	0.675402	30	0.524516	30	0.516073	30	0.610221	30	0.522491	30
	35	0.543328	35	0.580564	35	0.40899	35	0.799689	35	0.728792	35	0.885992	35	0.592347	35	0.54347	35	0.620696	35	0.440011	35	0.680428	35	0.504556	35	0.721455	35	0.675512	35	0.869544	35	0.578547	35	0.57975	35	0.525787	35	0.516229	35	0.592397	35	0.529232	35	0.519928	35	0.648146	35	0.536055	35
	40	0.655405	40	0.471423	40	0.483427	40	0.989799	40	0.663283	40	1.01018	40	0.57323	40	0.5044	40	0.67781	40	0.420523	40	0.707361	40	0.648465	40	0.827619	40	0.685299	40	0.743335	40	0.625464	40	0.614741	40	0.51667	40	0.517823	40	0.553484	40	0.580275	40	0.463178	40	0.53268	40	0.49391	40
	45	0.683033	45	0.407715	45	0.447273	45	0.949909	45	0.710342	45	0.955578	45	0.732293	45	0.552965	45	0.665387	45	0.424739	45	0.708264	45	0.631722	45	0.714961	45	0.69107	45	0.725668	45	0.544134	45	0.654211	45	0.568773	45	0.527731	45	0.583298	45	0.625425	45	0.481715	45	0.467926	45	0.476012	45
	50	0.63355	50	0.477853	50	0.468546	50	0.757104	50	0.682219	50	0.743548	50	0.594463	50	0.625222	50	0.674516	50	0.400791	50	0.748919	50	0.627628	50	0.611027	50	0.726334	50	0.736832	50	0.559728	50	0.665685	50	0.582372	50	0.535394	50	0.559715	50	0.686444	50	0.407123	50	0.451401	50	0.584061	50
	55	0.6004	55	0.503499	55	0.615156	55	0.726862	55	0.689495	55	0.673001	55	0.574023	55	0.614439	55	0.788006	55	0.455262	55	0.760959	55	0.594418	55	0.679879	55	0.668236	55	0.863054	55	0.677621	55	0.644496	55	0.563705	55	0.515929	55	0.570121	55	0.650547	55	0.460927	55	0.460187	55	0.491981	55
	60	0.797554	60	0.613676	60	0.592935	60	0.763287	60	0.744948	60	0.724468	60	0.562604	60	0.505978	60	0.80642	60	0.496948	60	0.710837	60	0.531933	60	0.689328	60	0.622034	60	0.897079	60	0.64995	60	0.61136	60	0.542987	60	0.493289	60	0.657273	60	0.580759	60	0.503033	60	0.553698	60	0.47	60
	65	0.820946	65	0.715027	65	0.60441	65	0.852746	65	0.701822	65	0.885794	65	0.515551	65	0.445136	65	0.799818	65	0.497029	65	0.630936	65	0.50479	65	0.65158	65	0.583156	65	0.786777	65	0.574206	65	0.621191	65	0.551248	65	0.475139	65	0.609341	65	0.560984	65	0.429331	65	0.627324	65	0.496249	65
	70	0.792808	70	0.729218	70	0.69813	70	0.801902	70	0.752622	70	1.10423	70	0.55204	70	0.401529	70	0.759752	70	0.451179	70	0.512972	70	0.529	70	0.688027	70	0.582171	70	0.847697	70	0.571336	70	0.667548	70	0.532182	70	0.487049	70	0.523613	70	0.615578	70	0.500083	70	0.656136	70	0.54569	70
	75	0.59062	75	0.708644	75	0.655043	75	0.657824	75	0.788521	75	1.09389	75	0.644744	75	0.425196	75	0.764287	75	0.411047	75	0.473155	75	0.67531	75	0.691735	75	0.637909	75	0.899275	75	0.627016	75	0.658547	75	0.50909	75	0.47632	75	0.455439	75	0.692626	75	0.525907	75	0.609613	75	0.640953	75
	80	0.603021	80	0.672374	80	0.622051	80	0.712164	80	0.756401	80	0.977407	80	0.669917	80	0.410106	80	0.676784	80	0.424184	80	0.485955	80	0.692172	80	0.667635	80	0.754152	80	0.95411	80	0.658947	80	0.628767	80	0.494264	80	0.489916	80	0.422899	80	0.755968	80	0.484922	80	0.613287	80	0.6322	80
	85	0.672972	85	0.611067	85	0.567705	85	0.907379	85	0.738966	85	0.83694	85	0.764466	85	0.36451	85	0.585322	85	0.459485	85	0.538837	85	0.69867	85	0.616649	85	0.742772	85	0.829694	85	0.609493	85	0.636773	85	0.468808	85	0.500884	85	0.396104	85	0.839555	85	0.507514	85	0.648528	85	0.573395	85
	90	0.604783	90	0.533267	90	0.444786	90	0.960239	90	0.775182	90	1.11357	90	0.779183	90	0.378172	90	0.561377	90	0.480719	90	0.604871	90	0.623199	90	0.563286	90	0.714607	90	0.844469	90	0.573584	90	0.650765	90	0.470881	90	0.506405	90	0.419787	90	0.842471	90	0.51344	90	0.677475	90	0.532181	90
	95	0.545082	95	0.492304	95	0.416672	95	0.761661	95	0.80544	95	1.32048	95	0.738464	95	0.414628	95	0.523759	95	0.426543	95	0.461696	95	0.574766	95	0.613121	95	0.735107	95	0.955058	95	0.553229	95	0.667754	95	0.481933	95	0.535522	95	0.430655	95	0.791263	95	0.443263	95	0.597417	95	0.497663	95
	100	0.482103	100	0.517091	100	0.471549	100	0.593063	100	0.69714	100	1.19458	100	0.797281	100	0.397942	100	0.536727	100	0.395404	100	0.386638	100	0.676157	100	0.768899	100	0.811545	100	0.933795	100	0.617289	100	0.664224	100	0.474223	100	0.529953	100	0.444889	100	0.728332	100	0.405431	100	0.481087	100	0.430545	100
[truncated: 35 more columns]

## Sheet: Summary
% Chromosome Length		Mean	STDDEV	SEM		Mean	STDDEV	SEM
0-5	IF	1	0	0	FISH	181.162	31.6821	5.00939
5-10		0.926804	0.0866478	0.0137002		181.736	26.7235	4.22536
10-15		0.776596	0.115897	0.0183249		182.056	24.9918	3.95156
15-20		0.661945	0.116437	0.0184103		184.295	26.3159	4.1609
20-25		0.617386	0.100929	0.0159583		186.254	27.3687	4.32737
25-30		0.609576	0.101304	0.0160175		189.07	27.1413	4.29142
30-35		0.607446	0.121295	0.0191784		196.288	32.2569	5.10027
35-40		0.615107	0.145509	0.023007		205.24	39.4581	6.23887
40-45		0.616475	0.145562	0.0230154		223.956	61.3041	9.69303
45-50		0.59853	0.118323	0.0187086		264.396	99.4121	15.7184
50-55		0.594011	0.122438	0.0193591		314.58	130.305	20.6031
55-60		0.609278	0.144118	0.022787		398.563	171.136	27.0589
60-65		0.608204	0.163767	0.0258938		478.651	169.467	26.7951
65-70		0.620345	0.170327	0.026931		574.688	188.561	29.8141
70-75		0.626662	0.159159	0.0251653		637.603	202.37	31.9975
75-80		0.636994	0.157663	0.0249288		613.493	200.523	31.7055
80-85		0.637101	0.153232	0.0242281		516.026	208.421	32.9542
85-90		0.632327	0.171559	0.0271259		404.968	174.289	27.5574
90-95		0.625327	0.197411	0.0312134		313.221	129.357	20.4531
95-100		0.622412	0.223443	0.0353295		254.723	81.1622	12.8329
