# Supplementary figures and images for: Large domains of heterochromatin direct the formation of short mitotic chromosome loops
Source: eLife journal article supplement (doi:10.7554/elife.57212), 2020-09-11

Figure 4 - Figure supplement 1

A

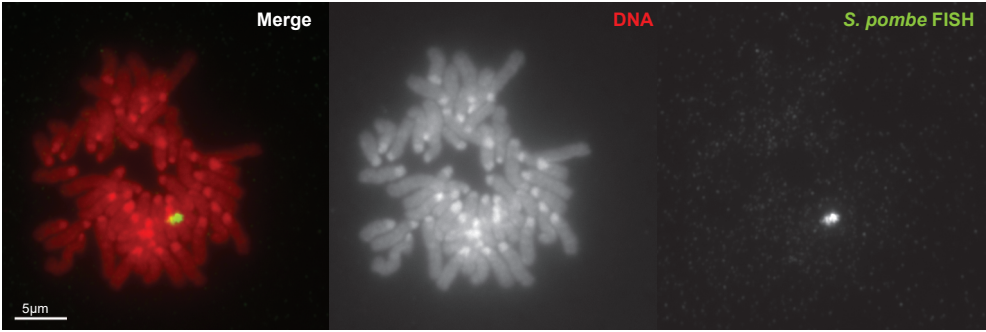

B

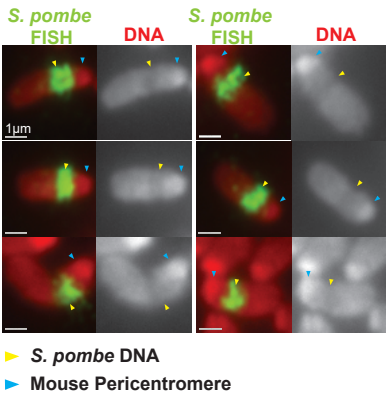

Supplement: supp [file elife-57212-supp-v1.zip]

Figure 2 - Figure supplement 1

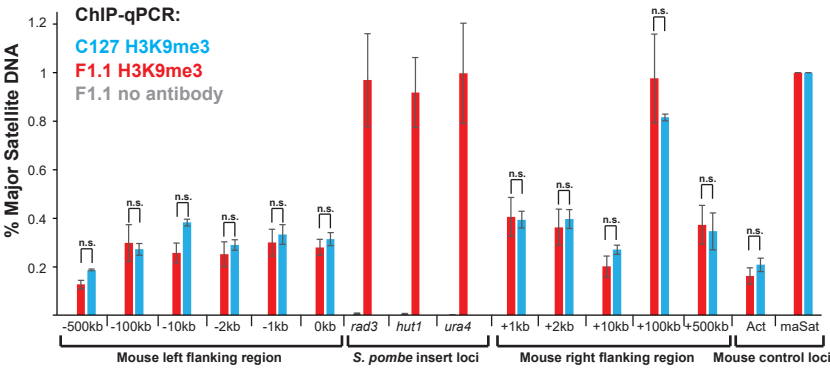

Supplement: supp [file elife-57212-supp-v1.zip]

Figure 5 - Figure supplement 1

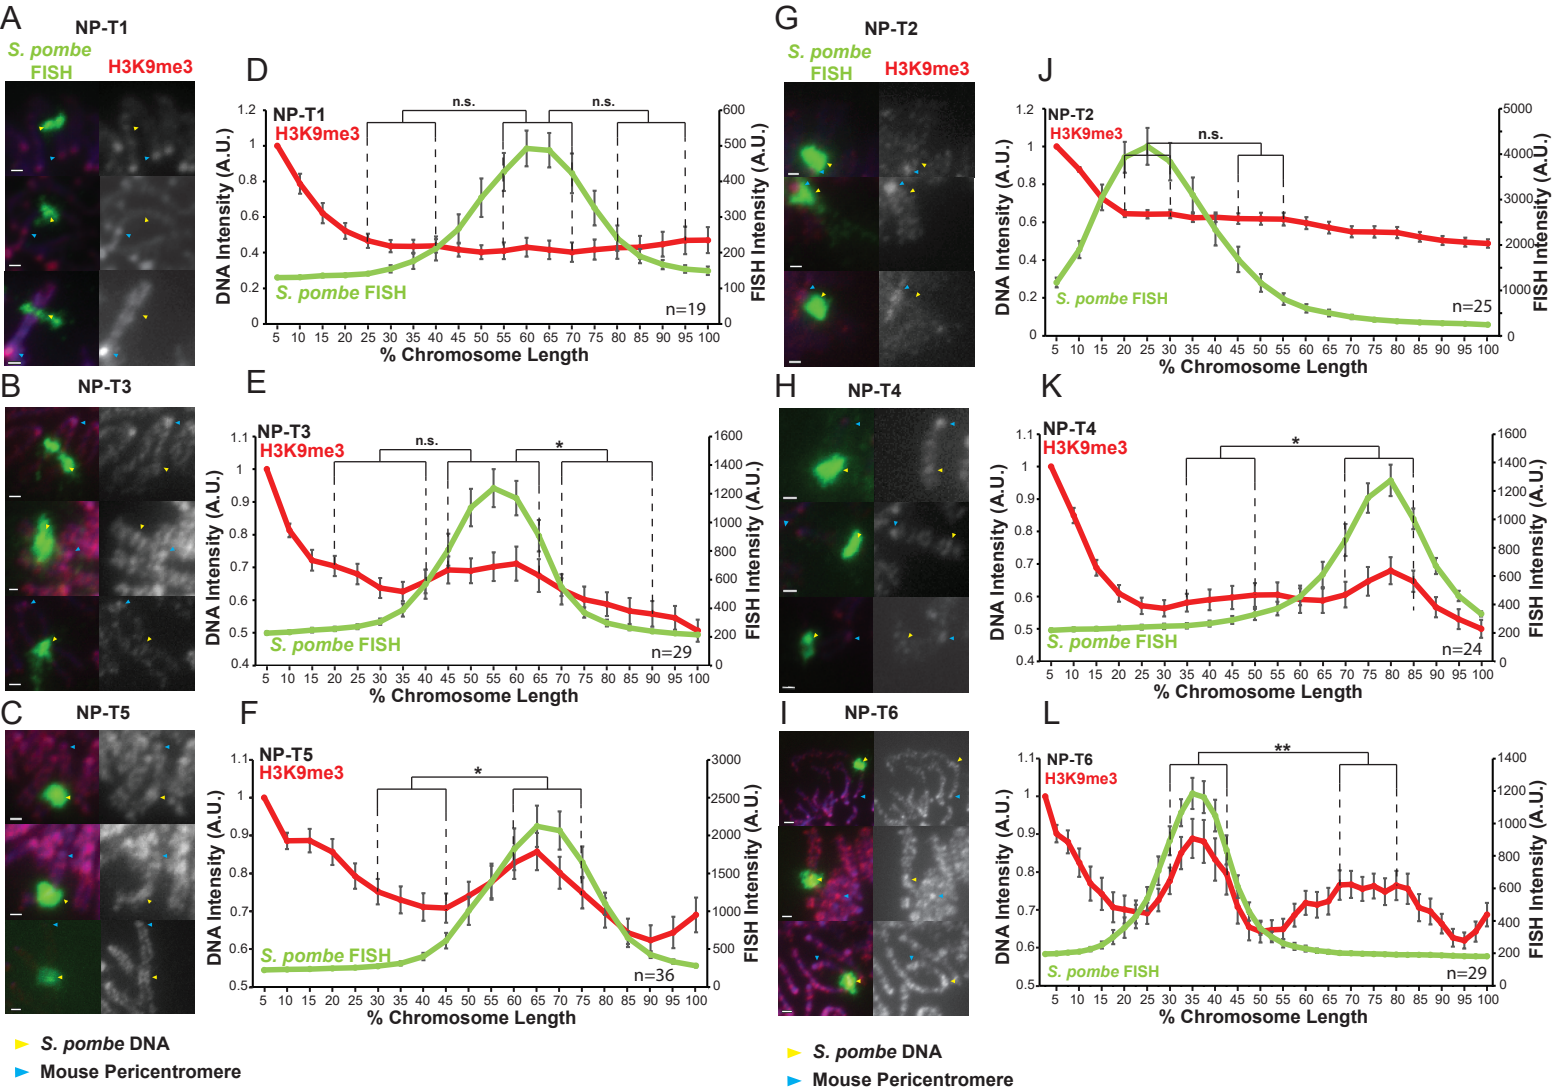

Supplement: supp [file elife-57212-supp-v1.zip]

Figure 6 - Figure supplement 3

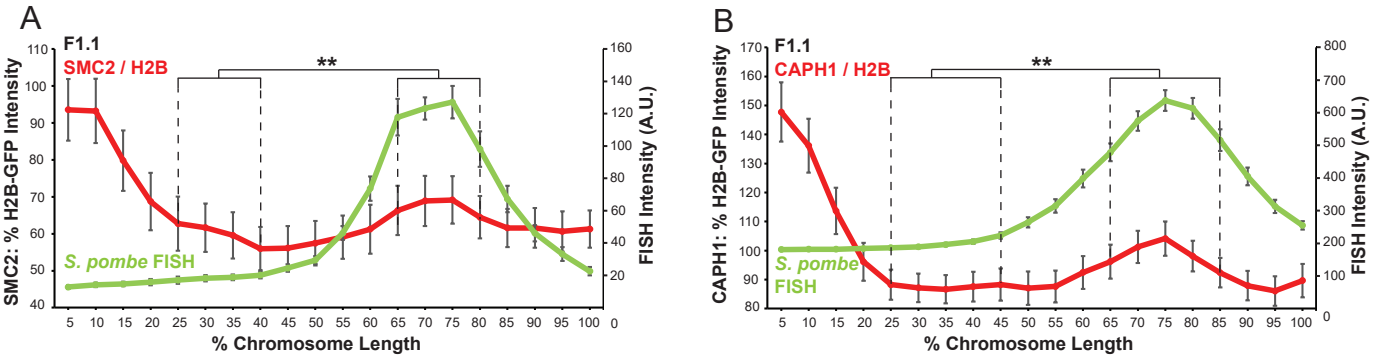

Supplement: supp [file elife-57212-supp-v1.zip]

Figure 6 - Figure supplement 1

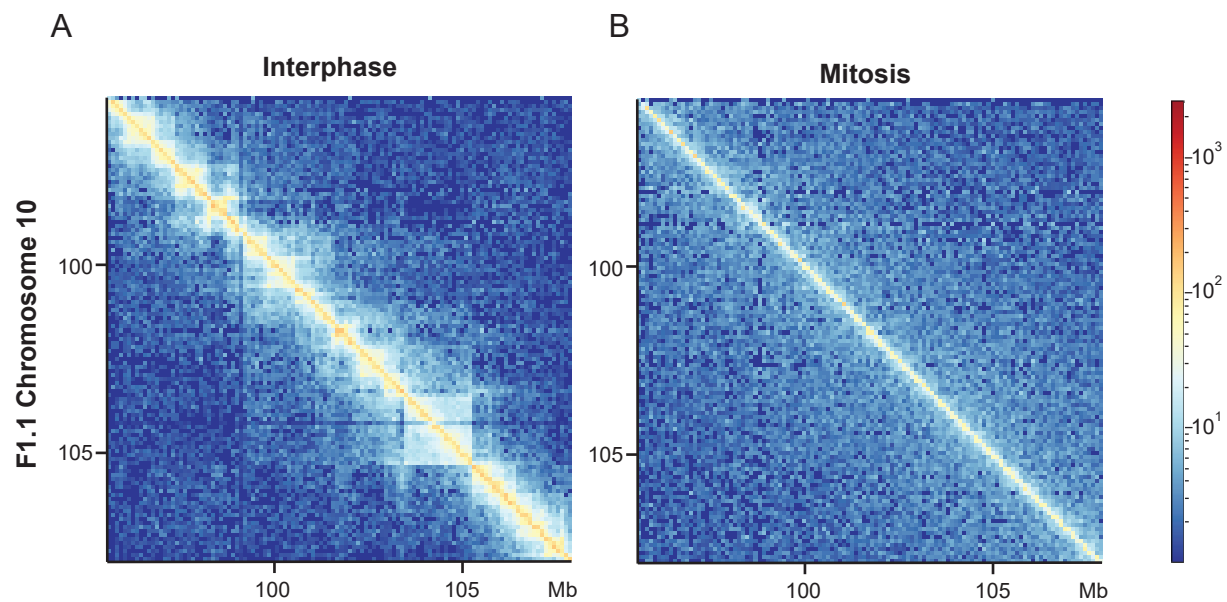

Supplement: supp [file elife-57212-supp-v1.zip]

Figure 6 - Figure supplement 2

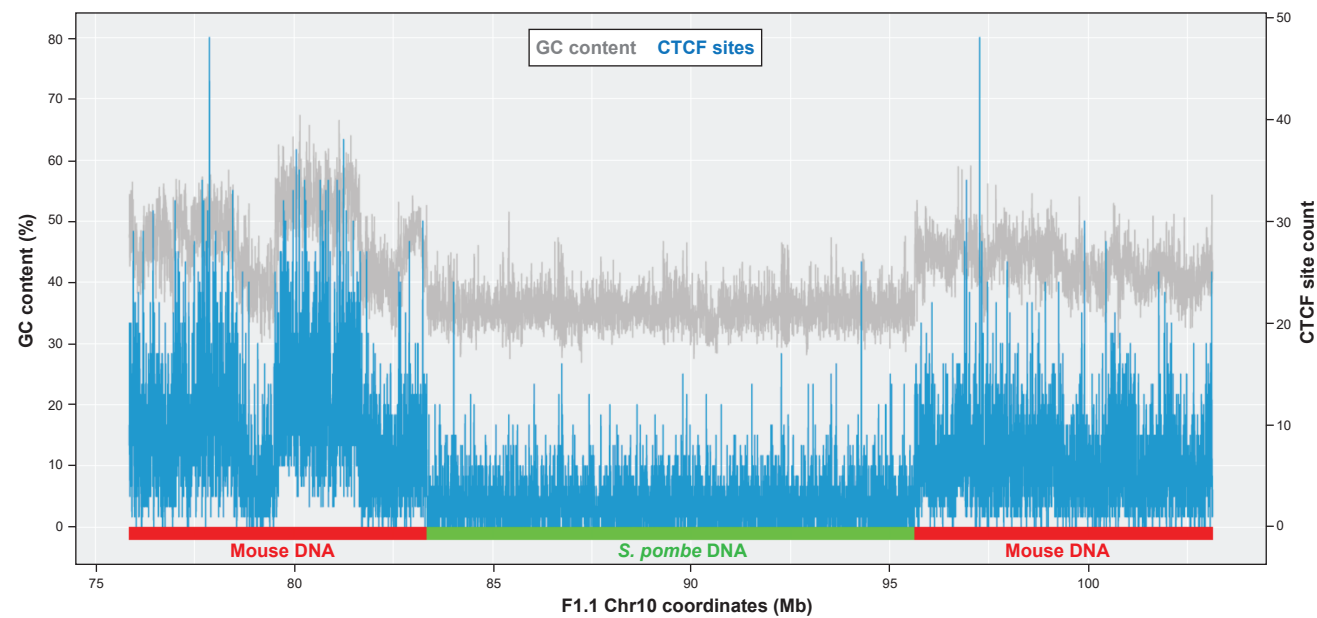

Supplement: supp [file elife-57212-supp-v1.zip]

Figure 1 - Figure supplement 1

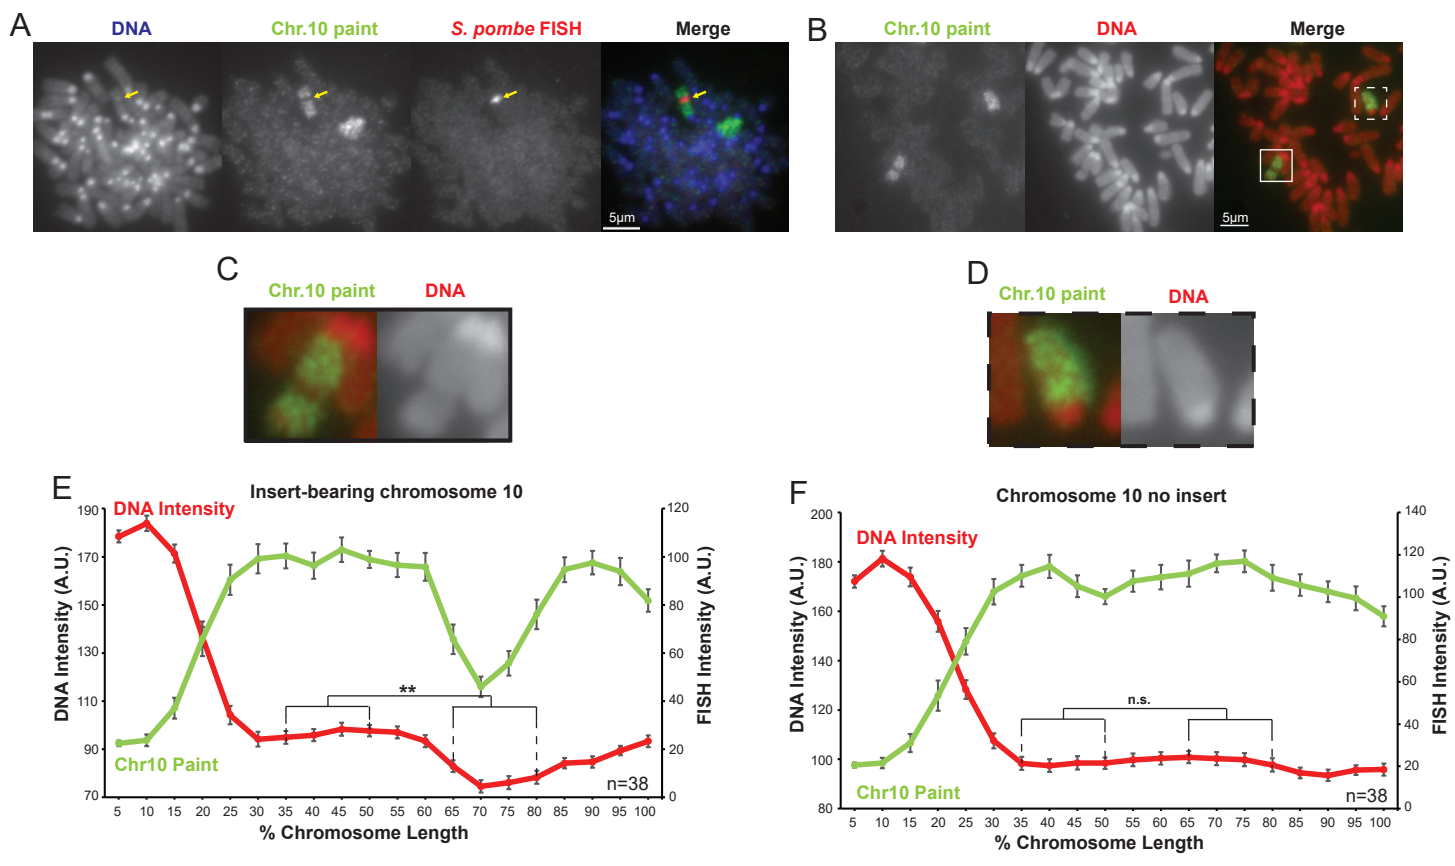

Supplement: supp [file elife-57212-supp-v1.zip]

Figure 3 - Figure supplement 1

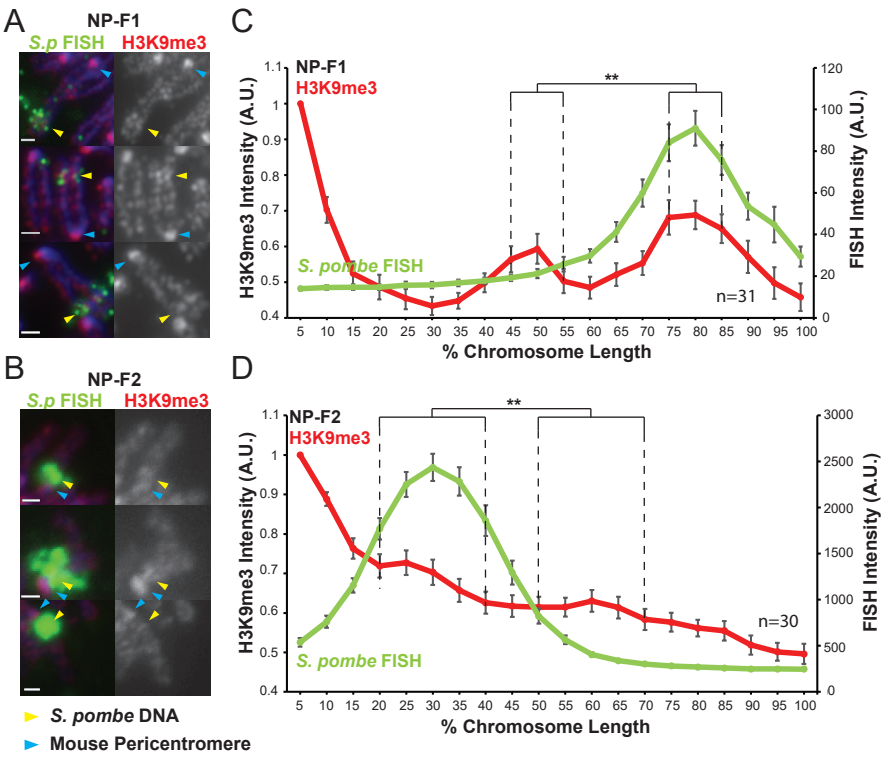

Supplement: supp [file elife-57212-supp-v1.zip]
